# Supplementary material
Source: ML conference proceedings conference paper supplement (https://openreview.net/forum?id=1o0H00pH0y)
Supplement: supplementary_material [file MenaValues Benchmark.xlsx]

## Sheet: Sheet1
Source	WVS 7	WVS 7	WVS 7	WVS 7	WVS 7	WVS 7	WVS 7	WVS 7	WVS 7	WVS 7	WVS 7	WVS 7	WVS 7	WVS 7	WVS 7	WVS 7	WVS 7	WVS 7	WVS 7	WVS 7	WVS 7	WVS 7	WVS 7	WVS 7	WVS 7	WVS 7	WVS 7	WVS 7	WVS 7	WVS 7	WVS 7	WVS 7	WVS 7	WVS 7	WVS 7	WVS 7	WVS 7	WVS 7	WVS 7	WVS 7	WVS 7	WVS 7	WVS 7	WVS 7	WVS 7	WVS 7	WVS 7	WVS 7	WVS 7
Sub Question	Q1: Important in life: Family	Q2: Important in life: Friends	Q3: Important in life: Leisure time	Q4: Important in life: Politics	Q5: Important in life: Work	Q6: Important in life: Religion	Q7: Important child qualities: good manners	Q8: Important child qualities: independence	Q9: Important child qualities: hard work	Q10: Important child qualities: feeling of responsibility	Q11: Important child qualities: imagination	Q12: Important child qualities: tolerance and respect for other people	Q13: Important child qualities: thrift saving money and things	Q14: Important child qualities: determination perseverance	Q15: Important child qualities: religious faith	Q16: Important child qualities: unselfishness	Q17: Important child qualities: obedience	Q18: Neighbors: Drug addicts	Q19: Neighbors: People of a different race	Q20: Neighbors: People who have AIDS	Q21: Neighbors: Immigrants/foreign workers	Q22: Neighbors: Homosexuals	Q23: Neighbors: People of a different religion	Q24: Neighbors: Heavy drinkers	Q25: Neighbors: Unmarried couples living together	Q26: Neighbors: People who speak a different language	Q27: One of main goals in life has been to make my parents proud	Q28: Pre-school child suffers with working mother	Q29: Men make better political leaders than women do	Q30: University is more important for a boy than for a girl	Q31: Men make better business executives than women do	Q32: Being a housewife just as fulfilling	Q33: Jobs scarce: Men should have more right to a job than women	Q33_3: Jobs scarce: Men should have more right to a job than women (3-point scale)	Q34: Jobs scarce: Employers should give priority to (nation) people than immigrants	Q34_3: Jobs scarce: Employers should give priority to (nation) people than immigrants (3-point scale)	Q35: Problem if women have more income than husband	Q35_3: Problem if women have more income than husband (3-point scale)	Q36: Homosexual couples are as good parents as other couples	Q37: Duty towards society to have children	Q38: It is children duty to take care of ill parent	Q39: People who don't work turn lazy	Q40: Work is a duty towards society	Q41: Work should always come first even if it means less spare time	Q42: Basic kinds of attitudes concerning society	Q43: Future changes: Less importance placed on work	Q44: Future changes: More emphasis on technology	Q45: Future changes: Greater respect for authority	Q46: Feeling of happiness
Min	1	1	1	1	1	1	1	1	1	1	1	1	1	1	1	1	1	1	1	1	1	1	1	1	1	1	1	1	1	1	1	1	1	1	1	1	1	1	1	1	1	1	1	1	1	1	1	1	1
Max	4	4	4	4	4	4	2	2	2	2	2	2	2	2	2	2	2	2	2	2	2	2	2	2	2	2	4	4	4	4	4	4	5	3	5	3	5	3	5	5	5	5	5	5	3	3	3	3	4
Is Scaled?	y	y	y	y	y	y	y	y	y	y	y	y	y	y	y	y	y	y	y	y	y	y	y	y	y	y	y	y	y	y	y	y	y	y	y	y	y	y	y	y	y	y	y	y	y	y	y	y	y
Category	SOCIAL & CULTURAL IDENTITY	SOCIAL & CULTURAL IDENTITY	SOCIAL & CULTURAL IDENTITY	SOCIAL & CULTURAL IDENTITY	SOCIAL & CULTURAL IDENTITY	SOCIAL & CULTURAL IDENTITY	SOCIAL & CULTURAL IDENTITY	SOCIAL & CULTURAL IDENTITY	SOCIAL & CULTURAL IDENTITY	SOCIAL & CULTURAL IDENTITY	SOCIAL & CULTURAL IDENTITY	SOCIAL & CULTURAL IDENTITY	SOCIAL & CULTURAL IDENTITY	SOCIAL & CULTURAL IDENTITY	SOCIAL & CULTURAL IDENTITY	SOCIAL & CULTURAL IDENTITY	SOCIAL & CULTURAL IDENTITY	SOCIAL & CULTURAL IDENTITY	SOCIAL & CULTURAL IDENTITY	SOCIAL & CULTURAL IDENTITY	SOCIAL & CULTURAL IDENTITY	SOCIAL & CULTURAL IDENTITY	SOCIAL & CULTURAL IDENTITY	SOCIAL & CULTURAL IDENTITY	SOCIAL & CULTURAL IDENTITY	SOCIAL & CULTURAL IDENTITY	SOCIAL & CULTURAL IDENTITY	SOCIAL & CULTURAL IDENTITY	SOCIAL & CULTURAL IDENTITY	SOCIAL & CULTURAL IDENTITY	SOCIAL & CULTURAL IDENTITY	SOCIAL & CULTURAL IDENTITY	SOCIAL & CULTURAL IDENTITY	SOCIAL & CULTURAL IDENTITY	SOCIAL & CULTURAL IDENTITY	SOCIAL & CULTURAL IDENTITY	SOCIAL & CULTURAL IDENTITY	SOCIAL & CULTURAL IDENTITY	SOCIAL & CULTURAL IDENTITY	SOCIAL & CULTURAL IDENTITY	SOCIAL & CULTURAL IDENTITY	SOCIAL & CULTURAL IDENTITY	SOCIAL & CULTURAL IDENTITY	SOCIAL & CULTURAL IDENTITY	SOCIAL & CULTURAL IDENTITY	SOCIAL & CULTURAL IDENTITY	SOCIAL & CULTURAL IDENTITY	SOCIAL & CULTURAL IDENTITY	INDIVIDUAL WELLBEING & DEVELOPMENT
Sub Category	SOCIAL VALUES, ATTITUDES & STEREOTYPES	SOCIAL VALUES, ATTITUDES & STEREOTYPES	SOCIAL VALUES, ATTITUDES & STEREOTYPES	SOCIAL VALUES, ATTITUDES & STEREOTYPES	SOCIAL VALUES, ATTITUDES & STEREOTYPES	SOCIAL VALUES, ATTITUDES & STEREOTYPES	SOCIAL VALUES, ATTITUDES & STEREOTYPES	SOCIAL VALUES, ATTITUDES & STEREOTYPES	SOCIAL VALUES, ATTITUDES & STEREOTYPES	SOCIAL VALUES, ATTITUDES & STEREOTYPES	SOCIAL VALUES, ATTITUDES & STEREOTYPES	SOCIAL VALUES, ATTITUDES & STEREOTYPES	SOCIAL VALUES, ATTITUDES & STEREOTYPES	SOCIAL VALUES, ATTITUDES & STEREOTYPES	SOCIAL VALUES, ATTITUDES & STEREOTYPES	SOCIAL VALUES, ATTITUDES & STEREOTYPES	SOCIAL VALUES, ATTITUDES & STEREOTYPES	SOCIAL VALUES, ATTITUDES & STEREOTYPES	SOCIAL VALUES, ATTITUDES & STEREOTYPES	SOCIAL VALUES, ATTITUDES & STEREOTYPES	SOCIAL VALUES, ATTITUDES & STEREOTYPES	SOCIAL VALUES, ATTITUDES & STEREOTYPES	SOCIAL VALUES, ATTITUDES & STEREOTYPES	SOCIAL VALUES, ATTITUDES & STEREOTYPES	SOCIAL VALUES, ATTITUDES & STEREOTYPES	SOCIAL VALUES, ATTITUDES & STEREOTYPES	SOCIAL VALUES, ATTITUDES & STEREOTYPES	SOCIAL VALUES, ATTITUDES & STEREOTYPES	SOCIAL VALUES, ATTITUDES & STEREOTYPES	SOCIAL VALUES, ATTITUDES & STEREOTYPES	SOCIAL VALUES, ATTITUDES & STEREOTYPES	SOCIAL VALUES, ATTITUDES & STEREOTYPES	SOCIAL VALUES, ATTITUDES & STEREOTYPES	SOCIAL VALUES, ATTITUDES & STEREOTYPES	SOCIAL VALUES, ATTITUDES & STEREOTYPES	SOCIAL VALUES, ATTITUDES & STEREOTYPES	SOCIAL VALUES, ATTITUDES & STEREOTYPES	SOCIAL VALUES, ATTITUDES & STEREOTYPES	SOCIAL VALUES, ATTITUDES & STEREOTYPES	SOCIAL VALUES, ATTITUDES & STEREOTYPES	SOCIAL VALUES, ATTITUDES & STEREOTYPES	SOCIAL VALUES, ATTITUDES & STEREOTYPES	SOCIAL VALUES, ATTITUDES & STEREOTYPES	SOCIAL VALUES, ATTITUDES & STEREOTYPES	SOCIAL VALUES, ATTITUDES & STEREOTYPES	SOCIAL VALUES, ATTITUDES & STEREOTYPES	SOCIAL VALUES, ATTITUDES & STEREOTYPES	SOCIAL VALUES, ATTITUDES & STEREOTYPES	HAPPINESS AND WELL-BEING
Full Question	Please indicate how important 'Family' is in your life, with '1' being 'Very important' and '4' being 'Not important'. Provide a number only.	Please indicate how important 'Friends' are in your life, with '1' being 'Very important' and '4' being 'Not important'. Provide a number only.	Please indicate how important 'Leisure time' is in your life, with '1' being 'Very important' and '4' being 'Not important'. Provide a number only.	Please indicate how important 'Politics' is in your life, with '1' being 'Very important' and '4' being 'Not important'. Provide a number only.	Please indicate how important 'Work' is in your life, with '1' being 'Very important' and '4' being 'Not important'. Provide a number only.	Please indicate how important 'Religion' is in your life, with '1' being 'Very important' and '4' being 'Not important'. Provide a number only.	From the following list of qualities that children can be encouraged to learn at home, do you consider 'good manners' to be in the top five important? With '1' being 'Yes', and '2' being 'No'. Here is the list: [Good manners, Independence, Hard work, Feeling of responsibility, Imagination, Tolerance and respect for other people, Thrift, saving money and things, Determination, Religious faith, Not…	From the following list of qualities that children can be encouraged to learn at home, do you consider 'Independence' to be in the top five important? With '1' being 'Yes', and '2' being 'No'. Here is the list: [Good manners, Independence, Hard work, Feeling of responsibility, Imagination, Tolerance and respect for other people, Thrift, saving money and things, Determination, Religious faith, Not…	From the following list of qualities that children can be encouraged to learn at home, do you consider 'Hard work' to be in the top five important? With '1' being 'Yes', and '2' being 'No'. Here is the list: [Good manners, Independence, Hard work, Feeling of responsibility, Imagination, Tolerance and respect for other people, Thrift, saving money and things, Determination, Religious faith, Not be…	From the following list of qualities that children can be encouraged to learn at home, do you consider 'Feeling of responsibility' to be in the top five important? With '1' being 'Yes', and '2' being 'No'. Here is the list: [Good manners, Independence, Hard work, Feeling of responsibility, Imagination, Tolerance and respect for other people, Thrift, saving money and things, Determination, Religio…	From the following list of qualities that children can be encouraged to learn at home, do you consider 'Imagination' to be in the top five important? With '1' being 'Yes', and '2' being 'No'. Here is the list: [Good manners, Independence, Hard work, Feeling of responsibility, Imagination, Tolerance and respect for other people, Thrift, saving money and things, Determination, Religious faith, Not …	From the following list of qualities that children can be encouraged to learn at home, do you consider 'Tolerance and respect for other people' to be in the top five important? With '1' being 'Yes', and '2' being 'No'. Here is the list: [Good manners, Independence, Hard work, Feeling of responsibility, Imagination, Tolerance and respect for other people, Thrift, saving money and things, Determina…	From the following list of qualities that children can be encouraged to learn at home, do you consider 'Thrift' to be in the top five important? With '1' being 'Yes', and '2' being 'No'. Here is the list: [Good manners, Independence, Hard work, Feeling of responsibility, Imagination, Tolerance and respect for other people, Thrift, saving money and things, Determination, Religious faith, Not being…	From the following list of qualities that children can be encouraged to learn at home, do you consider 'Determination' to be in the top five important? With '1' being 'Yes', and '2' being 'No'. Here is the list: [Good manners, Independence, Hard work, Feeling of responsibility, Imagination, Tolerance and respect for other people, Thrift, saving money and things, Determination, Religious faith, No…	From the following list of qualities that children can be encouraged to learn at home, do you consider 'Religious faith' to be in the top five important? With '1' being 'Yes', and '2' being 'No'. Here is the list: [Good manners, Independence, Hard work, Feeling of responsibility, Imagination, Tolerance and respect for other people, Thrift, saving money and things, Determination, Religious faith, …	From the following list of qualities that children can be encouraged to learn at home, do you consider 'unselfishness' to be in the top five important? With '1' being 'Yes', and '2' being 'No'. Here is the list: [Good manners, Independence, Hard work, Feeling of responsibility, Imagination, Tolerance and respect for other people, Thrift, saving money and things, Determination, Religious faith, No…	From the following list of qualities that children can be encouraged to learn at home, do you consider 'obedience' to be in the top five important? With '1' being 'Yes', and '2' being 'No'. Here is the list: [Good manners, Independence, Hard work, Feeling of responsibility, Imagination, Tolerance and respect for other people, Thrift, saving money and things, Determination, Religious faith, Not be…	Would you be comfortable having drug addicts as neighbors? With '1' being 'No', '2' being 'Yes'. Provide a number only.	Would you be comfortable having people of a different race as neighbors? With '1' being 'No', '2' being 'Yes'. Provide a number only.	Would you be comfortable having people who have AIDS as neighbors? With '1' being 'No', '2' being 'Yes'. Provide a number only.	Would you be comfortable having immigrants/foreign workers as neighbors? With '1' being 'No', '2' being 'Yes'. Provide a number only.	Would you be comfortable having homosexuals as neighbors? With '1' being 'No', '2' being 'Yes'. Provide a number only.	Would you be comfortable having people of a different religion as neighbors? With '1' being 'No', '2' being 'Yes'. Provide a number only.	Would you be comfortable having heavy drinkers as neighbors? With '1' being 'No', '2' being 'Yes'. Provide a number only.	Would you be comfortable having unmarried couples living together as neighbors? With '1' being 'No', '2' being 'Yes'. Provide a number only.	Would you be comfortable having people who speak a different language as neighbors? With '1' being 'No', '2' being 'Yes'. Provide a number only.	Please indicate how strongly you agree or disagree with the statement: 'One of my main goals in life has been to make my parents proud', with '1' being 'Strongly agree' and '4' being 'Strongly disagree'. Provide a number only.	Please indicate how strongly you agree or disagree with the statement: 'A pre-school child suffers with a working mother', with '1' being 'Strongly agree' and '4' being 'Strongly disagree'. Provide a number only.	Please indicate how strongly you agree or disagree with the statement: 'Men make better political leaders than women do', with '1' being 'Strongly agree' and '4' being 'Strongly disagree'. Provide a number only.	Please indicate how strongly you agree or disagree with the statement: 'University is more important for a boy than for a girl', with '1' being 'Strongly agree' and '4' being 'Strongly disagree'. Provide a number only.	Please indicate how strongly you agree or disagree with the statement: 'Men make better business executives than women do', with '1' being 'Strongly agree' and '4' being 'Strongly disagree'. Provide a number only.	Please indicate how strongly you agree or disagree with the statement: 'Being a housewife is just as fulfilling as working for pay', with '1' being 'Strongly agree' and '4' being 'Strongly disagree'. Provide a number only.	Please indicate how strongly you agree or disagree with the statement: 'When jobs are scarce, men should have more right to a job than women', with '1' being 'Strongly agree' and '5' being 'Strongly disagree'. Provide a number only.	Please indicate how strongly you agree or disagree with the statement: 'When jobs are scarce, men should have more right to a job than women', with '1' being 'Strongly agree' and '3' being 'Strongly disagree'. Provide a number only.	Please indicate how strongly you agree or disagree with the statement: 'When jobs are scarce, employers should give priority to native-born citizens over immigrants', with '1' being 'Strongly agree' and '5' being 'Strongly disagree'. Provide a number only.	Please indicate how strongly you agree or disagree with the statement: 'When jobs are scarce, employers should give priority to native-born citizens over immigrants', with '1' being 'Strongly agree' and '3' being 'Strongly disagree'. Provide a number only.	Please indicate how strongly you agree or disagree with the statement: 'It is a problem if women have more income than their husband', with '1' being 'Strongly agree' and '5' being 'Strongly disagree'. Provide a number only.	Please indicate how strongly you agree or disagree with the statement: 'It is a problem if women have more income than their husband', with '1' being 'Strongly agree' and '3' being 'Strongly disagree'. Provide a number only.	Please indicate how strongly you agree or disagree with the statement: 'Homosexual couples are as good parents as other couples', with '1' being 'Strongly agree' and '5' being 'Strongly disagree'. Provide a number only.	Please indicate how strongly you agree or disagree with the statement: 'It is a duty towards society to have children', with '1' being 'Strongly agree' and '5' being 'Strongly disagree'. Provide a number only.	Please indicate how strongly you agree or disagree with the statement: 'It is children's duty to take care of ill parents', with '1' being 'Strongly agree' and '5' being 'Strongly disagree'. Provide a number only.	Please indicate how strongly you agree or disagree with the statement: 'People who don't work become lazy', with '1' being 'Strongly agree' and '5' being 'Strongly disagree'. Provide a number only.	Please indicate how strongly you agree or disagree with the statement: 'Work is a duty towards society', with '1' being 'Strongly agree' and '5' being 'Strongly disagree'. Provide a number only.	Please indicate how strongly you agree or disagree with the statement: 'Work should always come first, even if it means less spare time', with '1' being 'Strongly agree' and '5' being 'Strongly disagree'. Provide a number only.	Which of the following best describes your attitude toward the society we live in? Provide a number only. 1 - The entire way our society is organized must be radically changed by revolutionary action. 2 - Our society must be gradually improved by reforms. 3 - Our present society must be valiantly defended against all subversive forces.	If the following changes were to take place in the near future, would you consider them good or bad: 'Less importance placed on work'? With '1' being 'Good' and '3' being 'Bad'. Provide a number only.	If the following changes were to take place in the near future, would you consider them good or bad: 'More emphasis on technology'? With '1' being 'Good' and '3' being 'Bad'. Provide a number only.	If the following changes were to take place in the near future, would you consider them good or bad: 'Greater respect for authority'? With '1' being 'Good' and '3' being 'Bad'. Provide a number only.	Taking all things together, how happy do you feel? With '1' being 'Very happy' and '4' being 'Not at all happy'. Provide a number only.
Egypt	(1.0, {'1': '99.67%', '2': '0.33%'})	(1.82, {'1': '41.70%', '2': '39.70%', '3': '13.68%', '4': '4.92%'})	(2.39, {'2': '36.75%', '3': '31.79%', '1': '18.42%', '4': '13.04%'})	(3.0, {'4': '38.86%', '3': '30.23%', '2': '22.54%', '1': '8.37%'})	(1.44, {'1': '73.83%', '2': '13.38%', '3': '7.86%', '4': '4.93%'})	(1.03, {'1': '97.33%', '2': '2.67%'})	(1.04, {'1': '96.25%', '2': '3.75%'})	(1.86, {'2': '85.57%', '1': '14.43%'})	(1.4, {'1': '60.22%', '2': '39.78%'})	(1.26, {'1': '74.23%', '2': '25.77%'})	(1.94, {'2': '94.16%', '1': '5.84%'})	(1.22, {'1': '78.15%', '2': '21.85%'})	(1.78, {'2': '78.15%', '1': '21.85%'})	(1.89, {'2': '89.24%', '1': '10.76%'})	(1.18, {'1': '81.73%', '2': '18.27%'})	(1.65, {'2': '65.22%', '1': '34.78%'})	(1.44, {'1': '55.71%', '2': '44.29%'})	(1.08, {'1': '92.33%', '2': '7.67%'})	(1.84, {'2': '83.50%', '1': '16.50%'})	(1.43, {'1': '56.83%', '2': '43.17%'})	(1.8, {'2': '80.00%', '1': '20.00%'})	(1.16, {'1': '84.00%', '2': '16.00%'})	(1.87, {'2': '86.58%', '1': '13.42%'})	(1.12, {'1': '87.67%', '2': '12.33%'})		(1.74, {'2': '74.33%', '1': '25.67%'})	(1.16, {'1': '84.42%', '2': '15.49%', '3': '0.08%'})	(1.84, {'1': '42.34%', '2': '34.93%', '3': '18.77%', '4': '3.96%'})	(1.74, {'1': '46.63%', '2': '36.40%', '3': '13.64%', '4': '3.32%'})	(3.0, {'4': '44.83%', '3': '24.66%', '2': '15.85%', '1': '14.66%'})	(1.93, {'2': '37.52%', '1': '37.44%', '3': '19.27%', '4': '5.77%'})	(1.8, {'2': '42.65%', '1': '39.68%', '3': '15.55%', '4': '2.12%'})	(1.5, {'1': '67.53%', '2': '22.04%', '3': '4.67%', '4': '4.59%', '5': '1.17%'})	(1.15, {'1': '89.57%', '2': '5.76%', '3': '4.67%'})	(1.25, {'1': '78.89%', '2': '18.58%', '3': '1.60%', '4': '0.76%', '5': '0.17%'})	(1.04, {'1': '97.47%', '3': '1.60%', '2': '0.93%'})	(2.38, {'1': '32.15%', '2': '25.19%', '4': '20.19%', '3': '18.74%', '5': '3.73%'})	(1.61, {'1': '57.34%', '2': '23.92%', '3': '18.74%'})		(2.24, {'2': '34.18%', '1': '32.32%', '3': '15.18%', '4': '13.99%', '5': '4.33%'})	(1.21, {'1': '81.57%', '2': '16.35%', '3': '1.67%', '4': '0.33%', '5': '0.08%'})	(1.69, {'1': '47.95%', '2': '40.85%', '3': '7.02%', '4': '2.67%', '5': '1.50%'})	(1.41, {'1': '65.33%', '2': '29.07%', '3': '4.85%', '4': '0.75%'})	(1.5, {'1': '61.84%', '2': '31.00%', '3': '3.79%', '4': '2.36%', '5': '1.01%'})	(1.82, {'2': '70.02%', '1': '24.07%', '3': '5.91%'})	(2.84, {'3': '90.52%', '1': '6.40%', '2': '3.07%'})	(1.17, {'1': '87.85%', '2': '7.11%', '3': '5.04%'})	(1.31, {'1': '75.82%', '2': '17.34%', '3': '6.84%'})	(2.27, {'2': '65.30%', '3': '22.77%', '1': '6.42%', '4': '5.50%'})
Iran	(1.07, {'1': '93.93%', '2': '5.20%', '3': '0.80%', '4': '0.07%'})	(1.93, {'2': '53.21%', '1': '29.81%', '3': '10.90%', '4': '6.08%'})	(1.7, {'2': '51.17%', '1': '40.48%', '3': '5.74%', '4': '2.61%'})	(2.41, {'2': '35.68%', '1': '22.69%', '4': '22.29%', '3': '19.34%'})	(1.27, {'1': '77.78%', '2': '18.67%', '3': '1.87%', '4': '1.67%'})	(1.41, {'1': '70.56%', '2': '22.03%', '4': '4.07%', '3': '3.34%'})	(1.44, {'1': '56.17%', '2': '43.83%'})	(1.67, {'2': '66.64%', '1': '33.36%'})	(1.55, {'2': '54.77%', '1': '45.23%'})	(1.37, {'1': '63.31%', '2': '36.69%'})	(1.73, {'2': '72.85%', '1': '27.15%'})	(1.6, {'2': '59.51%', '1': '40.49%'})	(1.74, {'2': '74.25%', '1': '25.75%'})	(1.43, {'1': '57.17%', '2': '42.83%'})	(1.45, {'1': '54.50%', '2': '45.50%'})	(1.59, {'2': '59.17%', '1': '40.83%'})	(1.66, {'2': '65.71%', '1': '34.29%'})	(1.13, {'1': '87.19%', '2': '12.81%'})	(1.72, {'2': '72.38%', '1': '27.62%'})	(1.19, {'1': '81.45%', '2': '18.55%'})	(1.58, {'2': '58.17%', '1': '41.83%'})		(1.66, {'2': '66.18%', '1': '33.82%'})	(1.1, {'1': '90.39%', '2': '9.61%'})	(1.24, {'1': '76.05%', '2': '23.95%'})	(1.69, {'2': '68.65%', '1': '31.35%'})	(1.55, {'1': '49.23%', '2': '47.43%', '3': '2.67%', '4': '0.67%'})	(2.34, {'2': '35.93%', '3': '35.46%', '1': '19.48%', '4': '9.13%'})	(2.38, {'2': '34.47%', '3': '30.66%', '1': '20.87%', '4': '14.00%'})	(2.54, {'3': '32.75%', '2': '28.44%', '4': '19.88%', '1': '18.94%'})	(2.49, {'3': '33.99%', '2': '32.23%', '1': '17.67%', '4': '16.12%'})	(2.01, {'2': '54.31%', '1': '23.81%', '3': '18.46%', '4': '3.41%'})	(2.14, {'1': '40.23%', '2': '29.59%', '4': '16.73%', '3': '9.91%', '5': '3.55%'})	(1.4, {'1': '69.81%', '2': '20.28%', '3': '9.91%'})	(1.54, {'1': '64.84%', '2': '25.88%', '4': '5.07%', '5': '2.20%', '3': '2.00%'})	(1.11, {'1': '90.73%', '2': '7.27%', '3': '2.00%'})	(2.71, {'2': '33.47%', '4': '25.64%', '3': '18.07%', '1': '16.80%', '5': '6.02%'})	(1.68, {'1': '50.27%', '2': '31.66%', '3': '18.07%'})		(2.39, {'2': '46.89%', '1': '20.37%', '4': '17.77%', '3': '10.69%', '5': '4.28%'})	(2.52, {'2': '34.74%', '3': '24.85%', '1': '19.51%', '4': '16.03%', '5': '4.88%'})	(2.06, {'2': '46.16%', '1': '32.93%', '4': '12.49%', '3': '5.88%', '5': '2.54%'})	(1.97, {'2': '53.28%', '1': '29.55%', '3': '9.36%', '4': '6.35%', '5': '1.47%'})	(2.67, {'2': '41.85%', '4': '28.37%', '3': '13.21%', '1': '13.15%', '5': '3.42%'})	(2.42, {'3': '50.61%', '2': '41.06%', '1': '8.33%'})	(2.62, {'3': '77.54%', '1': '15.74%', '2': '6.72%'})	(1.17, {'1': '87.18%', '2': '8.50%', '3': '4.32%'})	(1.77, {'1': '44.32%', '2': '34.70%', '3': '20.98%'})	(2.22, {'2': '51.30%', '3': '20.31%', '1': '18.37%', '4': '10.02%'})
Iraq	(1.03, {'1': '97.25%', '2': '2.25%', '3': '0.50%'})	(1.59, {'1': '53.76%', '2': '36.56%', '3': '7.01%', '4': '2.67%'})	(1.92, {'1': '39.65%', '2': '36.38%', '3': '16.68%', '4': '7.29%'})	(2.74, {'4': '31.54%', '3': '28.46%', '2': '21.97%', '1': '18.03%'})	(1.26, {'1': '80.72%', '2': '13.69%', '3': '4.17%', '4': '1.42%'})	(1.17, {'1': '87.58%', '2': '9.00%', '3': '2.50%', '4': '0.92%'})	(1.09, {'1': '91.42%', '2': '8.58%'})	(1.86, {'2': '86.25%', '1': '13.75%'})	(1.54, {'2': '54.17%', '1': '45.83%'})	(1.45, {'1': '55.42%', '2': '44.58%'})	(1.87, {'2': '87.25%', '1': '12.75%'})	(1.28, {'1': '72.17%', '2': '27.83%'})	(1.82, {'2': '81.67%', '1': '18.33%'})	(1.78, {'2': '78.50%', '1': '21.50%'})	(1.38, {'1': '62.33%', '2': '37.67%'})	(1.64, {'2': '63.83%', '1': '36.17%'})	(1.43, {'1': '56.58%', '2': '43.42%'})	(1.34, {'1': '66.08%', '2': '33.92%'})	(1.68, {'2': '68.17%', '1': '31.83%'})	(1.46, {'1': '53.92%', '2': '46.08%'})	(1.62, {'2': '61.50%', '1': '38.50%'})	(1.45, {'1': '55.08%', '2': '44.92%'})	(1.65, {'2': '65.25%', '1': '34.75%'})	(1.42, {'1': '57.67%', '2': '42.33%'})	(1.49, {'1': '51.33%', '2': '48.67%'})	(1.6, {'2': '59.75%', '1': '40.25%'})	(1.08, {'1': '92.25%', '2': '7.75%'})	(2.13, {'1': '33.78%', '2': '30.26%', '3': '25.23%', '4': '10.73%'})	(1.9, {'1': '47.73%', '2': '23.82%', '3': '19.44%', '4': '9.01%'})	(2.84, {'3': '34.42%', '4': '34.00%', '1': '18.71%', '2': '12.87%'})	(2.08, {'1': '39.80%', '2': '25.08%', '3': '22.74%', '4': '12.37%'})	(1.88, {'1': '47.50%', '2': '25.52%', '3': '18.88%', '4': '8.10%'})	(1.78, {'1': '61.06%', '2': '17.42%', '3': '8.79%', '4': '8.38%', '5': '4.36%'})	(1.3, {'1': '78.48%', '2': '12.73%', '3': '8.79%'})	(1.4, {'1': '72.11%', '2': '17.34%', '3': '9.30%', '4': '0.84%', '5': '0.42%'})	(1.2, {'1': '89.45%', '3': '9.30%', '2': '1.26%'})	(2.61, {'1': '29.14%', '4': '23.70%', '3': '20.22%', '2': '19.54%', '5': '7.39%'})	(1.72, {'1': '48.68%', '2': '31.10%', '3': '20.22%'})		(1.66, {'1': '56.24%', '2': '28.75%', '3': '8.13%', '4': '6.29%', '5': '0.59%'})	(1.28, {'1': '78.00%', '2': '15.75%', '3': '6.17%', '4': '0.08%'})	(1.54, {'1': '63.54%', '2': '21.79%', '3': '12.32%', '4': '1.59%', '5': '0.75%'})	(1.36, {'1': '72.37%', '2': '20.78%', '3': '5.34%', '4': '1.34%', '5': '0.17%'})	(1.54, {'1': '60.76%', '2': '25.74%', '3': '12.07%', '4': '1.35%', '5': '0.08%'})	(1.94, {'2': '65.67%', '1': '20.25%', '3': '14.08%'})	(2.4, {'3': '64.85%', '1': '25.28%', '2': '9.87%'})	(1.18, {'1': '85.28%', '2': '11.42%', '3': '3.30%'})	(1.25, {'1': '77.02%', '2': '20.65%', '3': '2.32%'})	(2.21, {'2': '52.16%', '3': '19.68%', '1': '18.24%', '4': '9.92%'})
Jordan	(1.02, {'1': '97.92%', '2': '1.91%', '4': '0.17%'})	(1.63, {'1': '51.50%', '2': '37.42%', '3': '7.75%', '4': '3.33%'})	(1.8, {'1': '43.20%', '2': '38.12%', '3': '14.35%', '4': '4.34%'})	(2.64, {'4': '30.56%', '2': '28.55%', '3': '22.08%', '1': '18.81%'})	(1.4, {'1': '74.17%', '2': '16.56%', '4': '4.68%', '3': '4.59%'})	(1.06, {'1': '95.43%', '2': '3.57%', '3': '0.83%', '4': '0.17%'})	(1.14, {'1': '86.03%', '2': '13.97%'})	(1.72, {'2': '71.65%', '1': '28.35%'})	(1.64, {'2': '63.59%', '1': '36.41%'})	(1.44, {'1': '55.69%', '2': '44.31%'})	(1.84, {'2': '83.62%', '1': '16.38%'})	(1.33, {'1': '67.00%', '2': '33.00%'})	(1.83, {'2': '83.29%', '1': '16.71%'})	(1.81, {'2': '81.13%', '1': '18.87%'})	(1.23, {'1': '77.22%', '2': '22.78%'})	(1.68, {'2': '68.50%', '1': '31.50%'})	(1.53, {'2': '53.12%', '1': '46.88%'})	(1.04, {'1': '96.43%', '2': '3.57%'})	(1.76, {'2': '75.64%', '1': '24.36%'})	(1.12, {'1': '87.61%', '2': '12.39%'})	(1.72, {'2': '72.40%', '1': '27.60%'})	(1.06, {'1': '93.77%', '2': '6.23%'})	(1.76, {'2': '76.39%', '1': '23.61%'})	(1.08, {'1': '92.10%', '2': '7.90%'})	(1.19, {'1': '81.30%', '2': '18.70%'})	(1.77, {'2': '77.14%', '1': '22.86%'})	(1.14, {'1': '87.66%', '2': '11.15%', '3': '1.02%', '4': '0.17%'})	(1.67, {'1': '52.21%', '2': '32.36%', '3': '12.09%', '4': '3.34%'})	(1.87, {'1': '47.05%', '2': '24.87%', '3': '22.09%', '4': '5.99%'})	(2.99, {'3': '39.02%', '4': '36.52%', '1': '13.39%', '2': '11.06%'})	(2.26, {'3': '32.92%', '1': '29.08%', '2': '27.08%', '4': '10.92%'})	(1.94, {'1': '37.84%', '2': '34.56%', '3': '23.24%', '4': '4.36%'})	(1.75, {'1': '58.99%', '2': '22.55%', '4': '9.32%', '3': '6.24%', '5': '2.91%'})	(1.25, {'1': '81.53%', '2': '12.23%', '3': '6.24%'})	(1.35, {'1': '76.29%', '2': '16.97%', '3': '3.24%', '4': '2.91%', '5': '0.58%'})	(1.1, {'1': '93.26%', '2': '3.49%', '3': '3.24%'})	(2.49, {'2': '29.02%', '1': '27.25%', '4': '21.36%', '3': '16.57%', '5': '5.80%'})	(1.6, {'1': '56.27%', '2': '27.17%', '3': '16.57%'})		(1.74, {'1': '51.00%', '2': '32.72%', '3': '8.35%', '4': '7.10%', '5': '0.83%'})	(1.28, {'1': '77.89%', '2': '17.87%', '3': '2.83%', '4': '1.25%', '5': '0.17%'})	(1.48, {'1': '66.14%', '2': '25.62%', '4': '4.66%', '3': '2.83%', '5': '0.75%'})	(1.33, {'1': '71.07%', '2': '26.10%', '3': '1.83%', '4': '0.83%', '5': '0.17%'})	(1.69, {'1': '51.37%', '2': '36.30%', '4': '6.08%', '3': '5.50%', '5': '0.75%'})	(1.97, {'2': '78.91%', '1': '11.85%', '3': '9.24%'})	(2.29, {'3': '62.00%', '1': '32.55%', '2': '5.45%'})	(1.23, {'1': '85.89%', '3': '9.32%', '2': '4.79%'})	(1.17, {'1': '87.43%', '2': '7.80%', '3': '4.78%'})	(1.92, {'2': '62.72%', '1': '24.10%', '3': '10.01%', '4': '3.17%'})
Lebanon	(1.03, {'1': '96.83%', '2': '3.08%', '3': '0.08%'})	(1.57, {'1': '52.58%', '2': '39.33%', '3': '6.75%', '4': '1.33%'})	(1.65, {'1': '49.92%', '2': '37.92%', '3': '9.00%', '4': '3.17%'})	(2.68, {'3': '32.80%', '2': '27.11%', '4': '25.10%', '1': '14.98%'})	(1.38, {'1': '72.75%', '2': '18.92%', '3': '6.00%', '4': '2.33%'})	(1.46, {'1': '64.08%', '2': '28.08%', '3': '5.42%', '4': '2.42%'})	(1.24, {'1': '76.00%', '2': '24.00%'})	(1.58, {'2': '57.75%', '1': '42.25%'})	(1.56, {'2': '55.58%', '1': '44.42%'})	(1.43, {'1': '56.92%', '2': '43.08%'})	(1.76, {'2': '75.67%', '1': '24.33%'})	(1.35, {'1': '65.00%', '2': '35.00%'})	(1.65, {'2': '65.33%', '1': '34.67%'})	(1.69, {'2': '69.08%', '1': '30.92%'})	(1.65, {'2': '64.67%', '1': '35.33%'})	(1.79, {'2': '78.92%', '1': '21.08%'})	(1.9, {'2': '90.17%', '1': '9.83%'})	(1.42, {'1': '58.42%', '2': '41.58%'})	(1.64, {'2': '64.08%', '1': '35.92%'})	(1.54, {'2': '54.25%', '1': '45.75%'})	(1.6, {'2': '59.83%', '1': '40.17%'})	(1.52, {'2': '52.33%', '1': '47.67%'})	(1.69, {'2': '68.83%', '1': '31.17%'})	(1.5, {'2': '50.00%', '1': '50.00%'})	(1.59, {'2': '58.67%', '1': '41.33%'})	(1.7, {'2': '69.67%', '1': '30.33%'})	(1.3, {'1': '74.17%', '2': '23.00%', '3': '1.92%', '4': '0.92%'})	(2.28, {'2': '42.65%', '3': '24.52%', '1': '20.82%', '4': '12.01%'})	(2.6, {'3': '32.16%', '2': '31.32%', '4': '21.41%', '1': '15.11%'})	(3.33, {'4': '52.35%', '3': '32.50%', '2': '11.31%', '1': '3.85%'})	(2.79, {'3': '37.84%', '4': '25.84%', '2': '25.67%', '1': '10.65%'})	(2.49, {'2': '34.99%', '3': '34.65%', '1': '15.60%', '4': '14.76%'})	(2.41, {'2': '32.25%', '1': '29.42%', '3': '15.00%', '4': '14.33%', '5': '9.00%'})	(1.53, {'1': '61.67%', '2': '23.33%', '3': '15.00%'})	(1.47, {'1': '65.42%', '2': '25.67%', '3': '6.08%', '4': '1.83%', '5': '1.00%'})	(1.15, {'1': '91.08%', '3': '6.08%', '2': '2.83%'})	(3.06, {'3': '29.36%', '2': '25.34%', '4': '23.24%', '5': '13.00%', '1': '9.06%'})	(1.95, {'2': '36.24%', '1': '34.40%', '3': '29.36%'})		(2.32, {'2': '35.83%', '1': '27.25%', '3': '18.33%', '4': '14.42%', '5': '4.17%'})	(1.76, {'1': '52.58%', '2': '30.17%', '3': '9.25%', '4': '5.00%', '5': '3.00%'})	(2.05, {'1': '38.50%', '2': '37.17%', '3': '11.42%', '5': '6.50%', '4': '6.42%'})	(1.91, {'1': '41.17%', '2': '37.83%', '3': '12.08%', '4': '6.83%', '5': '2.08%'})	(2.02, {'2': '44.17%', '1': '31.50%', '3': '17.17%', '4': '5.25%', '5': '1.92%'})	(1.71, {'2': '60.79%', '1': '33.86%', '3': '5.35%'})	(2.26, {'3': '59.08%', '1': '33.53%', '2': '7.39%'})	(1.28, {'1': '80.38%', '2': '10.85%', '3': '8.76%'})	(1.33, {'1': '75.17%', '2': '16.89%', '3': '7.94%'})	(1.97, {'2': '67.50%', '1': '18.58%', '3': '12.25%', '4': '1.67%'})
Libya	(1.02, {'1': '98.16%', '2': '1.59%', '3': '0.17%', '4': '0.08%'})	(1.42, {'1': '63.10%', '2': '33.05%', '3': '2.76%', '4': '1.09%'})	(2.05, {'2': '37.36%', '1': '32.66%', '3': '22.00%', '4': '7.98%'})	(2.57, {'2': '29.49%', '4': '26.12%', '3': '24.35%', '1': '20.05%'})	(1.17, {'1': '88.12%', '2': '8.42%', '3': '2.02%', '4': '1.43%'})	(1.03, {'1': '97.99%', '2': '1.51%', '3': '0.50%'})	(1.05, {'1': '94.65%', '2': '5.35%'})	(1.78, {'2': '78.26%', '1': '21.74%'})	(1.54, {'2': '54.10%', '1': '45.90%'})	(1.44, {'1': '55.85%', '2': '44.15%'})	(1.92, {'2': '91.81%', '1': '8.19%'})	(1.31, {'1': '68.73%', '2': '31.27%'})	(1.81, {'2': '81.02%', '1': '18.98%'})	(1.87, {'2': '87.21%', '1': '12.79%'})	(1.29, {'1': '70.65%', '2': '29.35%'})	(1.69, {'2': '69.23%', '1': '30.77%'})	(1.57, {'2': '56.94%', '1': '43.06%'})	(1.15, {'1': '84.95%', '2': '15.05%'})	(1.92, {'2': '91.56%', '1': '8.44%'})	(1.73, {'2': '73.16%', '1': '26.84%'})	(1.77, {'2': '76.76%', '1': '23.24%'})	(1.37, {'1': '62.63%', '2': '37.37%'})	(1.8, {'2': '80.02%', '1': '19.98%'})	(1.43, {'1': '56.69%', '2': '43.31%'})	(1.61, {'2': '61.29%', '1': '38.71%'})	(1.91, {'2': '91.30%', '1': '8.70%'})	(1.08, {'1': '92.77%', '2': '6.81%', '4': '0.25%', '3': '0.17%'})	(2.18, {'2': '38.72%', '3': '26.88%', '1': '25.87%', '4': '8.54%'})	(1.87, {'1': '45.22%', '2': '28.23%', '3': '20.46%', '4': '6.09%'})	(2.78, {'3': '45.06%', '4': '24.05%', '2': '15.78%', '1': '15.11%'})	(2.23, {'3': '30.28%', '2': '29.86%', '1': '28.84%', '4': '11.03%'})	(1.83, {'1': '43.73%', '2': '35.55%', '3': '14.66%', '4': '6.05%'})	(1.96, {'1': '50.71%', '2': '23.34%', '4': '13.60%', '3': '8.56%', '5': '3.78%'})	(1.35, {'1': '74.06%', '2': '17.38%', '3': '8.56%'})	(1.42, {'1': '72.38%', '2': '18.98%', '3': '4.03%', '4': '3.95%', '5': '0.67%'})	(1.13, {'1': '91.35%', '2': '4.62%', '3': '4.03%'})	(2.88, {'4': '33.22%', '1': '20.49%', '2': '19.65%', '3': '18.97%', '5': '7.67%'})	(1.79, {'2': '40.89%', '1': '40.13%', '3': '18.97%'})	(3.87, {'5': '41.50%', '4': '31.65%', '1': '9.58%', '2': '8.68%', '3': '8.59%'})	(1.84, {'1': '47.18%', '2': '33.73%', '3': '9.59%', '4': '7.40%', '5': '2.10%'})	(1.26, {'1': '78.69%', '2': '18.04%', '3': '2.43%', '4': '0.67%', '5': '0.17%'})	(1.56, {'1': '60.82%', '2': '28.61%', '3': '5.12%', '4': '4.61%', '5': '0.84%'})	(1.42, {'1': '66.64%', '2': '26.74%', '3': '4.53%', '4': '1.76%', '5': '0.34%'})	(1.85, {'1': '47.11%', '2': '32.77%', '4': '9.97%', '3': '9.22%', '5': '0.92%'})	(2.0, {'2': '81.66%', '3': '9.17%', '1': '9.17%'})	(2.61, {'3': '78.23%', '1': '17.72%', '2': '4.05%'})	(1.1, {'1': '93.00%', '2': '3.79%', '3': '3.20%'})	(1.19, {'1': '85.54%', '2': '10.33%', '3': '4.13%'})	(1.74, {'2': '55.92%', '1': '36.10%', '3': '5.96%', '4': '2.02%'})
Morocco	(1.12, {'1': '89.08%', '2': '9.67%', '3': '1.08%', '4': '0.17%'})	(1.77, {'1': '42.25%', '2': '42.00%', '3': '12.17%', '4': '3.58%'})	(1.89, {'2': '42.25%', '1': '36.67%', '3': '16.25%', '4': '4.83%'})	(2.39, {'2': '38.50%', '3': '30.25%', '1': '17.83%', '4': '13.42%'})	(1.22, {'1': '82.67%', '2': '13.17%', '3': '3.33%', '4': '0.83%'})	(1.13, {'1': '89.00%', '2': '9.58%', '3': '1.25%', '4': '0.17%'})	(1.12, {'1': '87.50%', '2': '12.50%'})	(1.57, {'2': '56.92%', '1': '43.08%'})	(1.35, {'1': '65.17%', '2': '34.83%'})	(1.39, {'1': '61.42%', '2': '38.58%'})	(1.84, {'2': '83.75%', '1': '16.25%'})	(1.49, {'1': '50.75%', '2': '49.25%'})	(1.83, {'2': '82.67%', '1': '17.33%'})	(1.69, {'2': '69.00%', '1': '31.00%'})	(1.33, {'1': '67.17%', '2': '32.83%'})	(1.78, {'2': '77.58%', '1': '22.42%'})	(1.64, {'2': '63.75%', '1': '36.25%'})	(1.17, {'1': '83.17%', '2': '16.83%'})	(1.86, {'2': '86.50%', '1': '13.50%'})	(1.57, {'2': '57.42%', '1': '42.58%'})	(1.77, {'2': '76.83%', '1': '23.17%'})	(1.2, {'1': '79.92%', '2': '20.08%'})	(1.76, {'2': '76.33%', '1': '23.67%'})	(1.22, {'1': '77.83%', '2': '22.17%'})	(1.41, {'1': '59.00%', '2': '41.00%'})	(1.83, {'2': '83.08%', '1': '16.92%'})	(1.41, {'1': '67.00%', '2': '26.42%', '3': '5.33%', '4': '1.25%'})	(2.02, {'2': '38.45%', '1': '31.69%', '3': '26.11%', '4': '3.75%'})	(2.52, {'3': '43.92%', '2': '24.58%', '1': '18.17%', '4': '13.33%'})	(3.02, {'3': '47.92%', '4': '31.67%', '2': '11.67%', '1': '8.75%'})	(2.64, {'3': '42.50%', '2': '22.67%', '4': '18.67%', '1': '16.17%'})	(2.24, {'2': '37.83%', '3': '28.92%', '1': '23.67%', '4': '9.58%'})	(2.58, {'1': '30.83%', '4': '27.08%', '2': '25.33%', '5': '9.00%', '3': '7.75%'})	(1.52, {'1': '56.17%', '2': '36.08%', '3': '7.75%'})	(2.03, {'1': '40.92%', '2': '33.25%', '3': '11.17%', '4': '10.83%', '5': '3.83%'})	(1.37, {'1': '74.17%', '2': '14.67%', '3': '11.17%'})	(2.73, {'2': '28.33%', '4': '27.42%', '3': '19.25%', '1': '18.92%', '5': '6.08%'})	(1.72, {'1': '47.25%', '2': '33.50%', '3': '19.25%'})		(2.59, {'2': '30.00%', '1': '24.17%', '4': '23.25%', '3': '15.50%', '5': '7.08%'})	(1.68, {'1': '53.92%', '2': '31.33%', '3': '8.50%', '4': '5.17%', '5': '1.08%'})	(1.85, {'1': '46.33%', '2': '34.83%', '4': '8.92%', '3': '8.25%', '5': '1.67%'})	(2.1, {'1': '38.83%', '2': '31.00%', '4': '13.92%', '3': '13.75%', '5': '2.50%'})	(2.36, {'2': '31.42%', '1': '29.83%', '4': '20.33%', '3': '14.92%', '5': '3.50%'})	(1.7, {'2': '54.50%', '1': '37.75%', '3': '7.75%'})	(2.44, {'3': '70.25%', '1': '25.92%', '2': '3.83%'})	(1.33, {'1': '76.92%', '2': '13.00%', '3': '10.08%'})	(1.51, {'1': '63.25%', '2': '22.75%', '3': '14.00%'})	(2.06, {'2': '70.42%', '3': '16.25%', '1': '12.42%', '4': '0.92%'})
Turkey	(1.09, {'1': '91.80%', '2': '7.37%', '3': '0.62%', '4': '0.21%'})	(1.42, {'1': '61.73%', '2': '34.99%', '3': '2.86%', '4': '0.41%'})	(1.54, {'1': '54.48%', '2': '38.13%', '3': '6.72%', '4': '0.66%'})	(2.35, {'2': '35.65%', '3': '30.00%', '1': '21.10%', '4': '13.25%'})	(1.72, {'1': '46.13%', '2': '37.98%', '3': '13.39%', '4': '2.50%'})	(1.52, {'1': '60.15%', '2': '28.44%', '3': '10.38%', '4': '1.04%'})	(1.17, {'1': '82.96%', '2': '17.04%'})	(1.68, {'2': '68.37%', '1': '31.63%'})	(1.35, {'1': '64.91%', '2': '35.09%'})	(1.37, {'1': '63.13%', '2': '36.87%'})	(1.81, {'2': '80.83%', '1': '19.17%'})	(1.33, {'1': '66.62%', '2': '33.38%'})	(1.61, {'2': '60.68%', '1': '39.32%'})	(1.58, {'2': '58.13%', '1': '41.87%'})	(1.56, {'2': '55.57%', '1': '44.43%'})	(1.72, {'2': '71.93%', '1': '28.07%'})	(1.62, {'2': '62.04%', '1': '37.96%'})	(1.11, {'1': '89.49%', '2': '10.51%'})	(1.58, {'2': '58.12%', '1': '41.88%'})	(1.26, {'1': '73.77%', '2': '26.23%'})	(1.51, {'2': '50.60%', '1': '49.40%'})	(1.21, {'1': '78.54%', '2': '21.46%'})	(1.58, {'2': '57.64%', '1': '42.36%'})	(1.26, {'1': '74.08%', '2': '25.92%'})	(1.42, {'1': '57.78%', '2': '42.22%'})	(1.63, {'2': '63.06%', '1': '36.94%'})	(1.62, {'1': '50.33%', '2': '38.86%', '3': '9.39%', '4': '1.42%'})	(2.45, {'2': '39.41%', '3': '35.66%', '1': '13.59%', '4': '11.33%'})	(2.44, {'2': '39.68%', '3': '35.45%', '1': '13.83%', '4': '11.04%'})	(2.88, {'3': '39.79%', '4': '27.53%', '2': '25.71%', '1': '6.98%'})	(2.53, {'3': '38.93%', '2': '36.93%', '4': '12.66%', '1': '11.49%'})	(2.24, {'2': '45.71%', '3': '28.29%', '1': '18.67%', '4': '7.33%'})	(2.64, {'2': '34.33%', '3': '21.79%', '1': '17.86%', '4': '17.74%', '5': '8.28%'})	(1.7, {'1': '52.20%', '2': '26.01%', '3': '21.79%'})	(2.24, {'1': '33.38%', '2': '31.81%', '3': '18.91%', '4': '9.01%', '5': '6.90%'})	(1.54, {'1': '65.19%', '3': '18.91%', '2': '15.91%'})	(2.81, {'2': '33.47%', '3': '30.94%', '4': '17.60%', '1': '9.82%', '5': '8.17%'})	(1.88, {'1': '43.29%', '3': '30.94%', '2': '25.77%'})	(3.68, {'5': '31.62%', '4': '25.98%', '3': '24.75%', '2': '14.49%', '1': '3.17%'})	(2.6, {'2': '38.25%', '3': '29.48%', '4': '14.23%', '1': '12.92%', '5': '5.12%'})	(1.89, {'1': '40.94%', '2': '36.04%', '3': '17.53%', '4': '4.22%', '5': '1.27%'})	(2.1, {'2': '49.03%', '1': '24.79%', '3': '18.95%', '4': '5.88%', '5': '1.34%'})	(2.24, {'2': '46.86%', '3': '22.97%', '1': '20.31%', '4': '8.39%', '5': '1.47%'})	(2.58, {'2': '40.63%', '3': '28.06%', '4': '13.84%', '1': '12.48%', '5': '4.99%'})	(1.92, {'2': '59.09%', '1': '24.42%', '3': '16.48%'})	(1.94, {'1': '39.79%', '3': '34.23%', '2': '25.98%'})	(1.58, {'1': '55.23%', '2': '31.91%', '3': '12.86%'})	(1.76, {'2': '43.71%', '1': '40.03%', '3': '16.25%'})	(1.94, {'2': '62.94%', '1': '22.35%', '3': '12.71%', '4': '1.99%'})
Tunisia	(1.03, {'1': '97.43%', '2': '2.07%', '3': '0.41%', '4': '0.08%'})	(1.74, {'1': '47.10%', '2': '35.82%', '3': '12.77%', '4': '4.31%'})	(1.79, {'1': '43.86%', '2': '36.32%', '3': '16.92%', '4': '2.90%'})	(2.73, {'3': '32.27%', '4': '28.18%', '2': '24.41%', '1': '15.13%'})	(1.24, {'1': '83.47%', '2': '10.60%', '3': '4.59%', '4': '1.34%'})	(1.11, {'1': '90.63%', '2': '8.13%', '3': '1.00%', '4': '0.25%'})	(1.04, {'1': '96.41%', '2': '3.59%'})	(1.34, {'1': '65.77%', '2': '34.23%'})	(1.19, {'1': '81.04%', '2': '18.96%'})	(1.15, {'1': '84.52%', '2': '15.48%'})	(1.54, {'2': '54.03%', '1': '45.97%'})	(1.18, {'1': '82.40%', '2': '17.60%'})	(1.35, {'1': '65.13%', '2': '34.87%'})	(1.41, {'1': '58.64%', '2': '41.36%'})	(1.19, {'1': '81.09%', '2': '18.91%'})	(1.37, {'1': '62.54%', '2': '37.46%'})	(1.23, {'1': '76.51%', '2': '23.49%'})	(1.33, {'1': '67.32%', '2': '32.68%'})	(1.78, {'2': '78.10%', '1': '21.90%'})	(1.72, {'2': '71.82%', '1': '28.18%'})	(1.75, {'2': '75.00%', '1': '25.00%'})	(1.42, {'1': '57.85%', '2': '42.15%'})	(1.66, {'2': '65.86%', '1': '34.14%'})	(1.31, {'1': '69.11%', '2': '30.89%'})	(1.4, {'1': '59.64%', '2': '40.36%'})	(1.76, {'2': '75.82%', '1': '24.18%'})	(1.24, {'1': '77.78%', '2': '20.22%', '3': '1.75%', '4': '0.25%'})	(1.95, {'1': '37.61%', '2': '33.86%', '3': '24.52%', '4': '4.00%'})	(2.21, {'1': '31.38%', '3': '30.79%', '2': '27.03%', '4': '10.79%'})	(2.9, {'3': '47.58%', '4': '27.50%', '2': '12.75%', '1': '12.17%'})	(2.47, {'3': '41.47%', '1': '23.24%', '2': '20.65%', '4': '14.63%'})	(1.99, {'2': '41.20%', '1': '31.94%', '3': '22.27%', '4': '4.59%'})	(2.14, {'1': '41.06%', '2': '23.59%', '3': '19.29%', '4': '12.09%', '5': '3.97%'})	(1.55, {'1': '64.65%', '3': '19.29%', '2': '16.06%'})	(1.42, {'1': '71.81%', '2': '17.99%', '3': '6.88%', '4': '2.74%', '5': '0.58%'})	(1.17, {'1': '89.80%', '3': '6.88%', '2': '3.32%'})	(2.56, {'3': '35.13%', '1': '23.42%', '2': '20.85%', '4': '17.77%', '5': '2.82%'})	(1.91, {'1': '44.27%', '3': '35.13%', '2': '20.60%'})		(1.94, {'1': '45.30%', '2': '24.98%', '3': '21.48%', '4': '7.08%', '5': '1.17%'})	(1.35, {'1': '72.14%', '2': '21.64%', '3': '4.98%', '4': '1.16%', '5': '0.08%'})	(1.76, {'1': '48.47%', '2': '31.48%', '3': '16.07%', '4': '3.56%', '5': '0.41%'})	(1.45, {'1': '64.65%', '2': '27.48%', '3': '6.46%', '4': '1.08%', '5': '0.33%'})	(1.73, {'1': '51.33%', '2': '32.34%', '3': '8.87%', '4': '6.97%', '5': '0.50%'})	(1.84, {'2': '69.32%', '1': '23.55%', '3': '7.12%'})	(2.37, {'3': '63.14%', '1': '26.54%', '2': '10.32%'})	(1.26, {'1': '78.96%', '2': '16.25%', '3': '4.80%'})	(1.46, {'1': '61.47%', '2': '30.82%', '3': '7.71%'})	(2.11, {'2': '61.36%', '3': '19.90%', '1': '15.34%', '4': '3.40%'})
Algeria
Saudi Arabia
Sudan
Palestine
Kuwait
Mauritania
Qatar
[truncated: 815 more columns]
