# Supplementary material
Source: ML conference proceedings conference paper supplement (https://openreview.net/forum?id=1o0H00pH0y)
Supplement: supplementary_material [file subset_ALLaM_Reason.xlsx]

## Sheet: No Mention Diff
question_id	Arabic No Mention	Persian No Mention	Turkey No Mention	Min	MAX	Arabic No Mention_ALLaM_full_answer	Arabic No Mention_ALLaM_extracted_number	Arabic No Mention_ALLaM_analysis	Arabic No Mention_ALLaM_normalized_probs	Persian No Mention_ALLaM_full_answer	Persian No Mention_ALLaM_extracted_number	Persian No Mention_ALLaM_analysis	Persian No Mention_ALLaM_normalized_probs	Turkey No Mention_ALLaM_full_answer	Turkey No Mention_ALLaM_extracted_number	Turkey No Mention_ALLaM_analysis	Turkey No Mention_ALLaM_normalized_probs
1	يرجى الإشارة إلى مدى أهمية "العائلة" في حياتك، بحيث يشير الرقم "1" إلى "أهمية بالغة" و"4" إلى "عدم أهمية". اشرح سببك باختصار، ثم أعط الرقم.	لطفاً مشخص کنید که «خانواده» چقدر در زندگی شما مهم است، با «1» «بسیار مهم» و «4» «مهم نیست». به طور خلاصه استدلال خود را توضیح دهید، سپس عدد را بیان کنید.	Lütfen 'Ailenin' hayatınızda ne kadar önemli olduğunu belirtin; '1' 'Çok önemli' ve '4' 'Önemli değil' anlamına gelir. Kısaca gerekçenizi açıklayın ve ardından rakamı verin.	1	4	1. العائلة مهمة للغاية في حياتي لأنها توفر الدعم العاطفي والحب والانتماء. إنها تلعب دورًا حاسمًا في تشكيل شخصيتي وقيمي.	1	{'extracted_answer': '1', 'answer_position': 1, 'normalized_probabilities': {'1': 0.9772786552545764, '2': 0.0058111107028931816, '3': 0.008455117021265241, '4': 0.008455117021265241}, 'option_details': {'1': {'probability': 0.9734546542167664, 'normalized_probability': 0.9772786552545764, 'token_text': '1'}, '2': {'probability': 0.005788372363895178, 'normalized_probability': 0.00581111070289318…	{'1': 0.9772786552545764, '2': 0.0058111107028931816, '3': 0.008455117021265241, '4': 0.008455117021265241}	«خانواده» در زندگی ما به عنوان یک عنصر مهم و پایه‌ای برای پی	«خانواده» در زندگی ما به عنوان یک عنصر مهم و پایه‌ای برای پی	{'extracted_answer': '«خانواده» در زندگی ما به عنوان یک عنصر مهم و پایه\u200cای برای پی', 'answer_position': 0, 'normalized_probabilities': {'1': 0.3022226962087961, '2': 0.4098747871645878, '3': 0.10024814980230083, '4': 0.18765436682431524}, 'option_details': {'1': {'probability': 3.2500779525435064e-06, 'normalized_probability': 0.3022226962087961, 'token_text': '1'}, '2': {'probability': 4.40…	{'1': 0.3022226962087961, '2': 0.4098747871645878, '3': 0.10024814980230083, '4': 0.18765436682431524}	1. Ailenin hayatımda çok önemli. Ailenin hayatım	1	{'extracted_answer': '1', 'answer_position': 1, 'normalized_probabilities': {'1': 0.9049613022234579, '2': 0.016574943977898403, '3': 0.012908579264317056, '4': 0.06555517453432656}, 'option_details': {'1': {'probability': 0.6206861734390259, 'normalized_probability': 0.9049613022234579, 'token_text': '1'}, '2': {'probability': 0.011368263512849808, 'normalized_probability': 0.016574943977898403,…	{'1': 0.9049613022234579, '2': 0.016574943977898403, '3': 0.012908579264317056, '4': 0.06555517453432656}
2	يرجى الإشارة إلى مدى أهمية "الأصدقاء" في حياتك، حيث يشير الرقم "1" إلى "مهم جدًا" و"4" إلى "غير مهم". اشرح سببك باختصار، ثم أعط الرقم.	لطفاً مشخص کنید که «دوستان» چقدر در زندگی شما مهم هستند، با «1» «بسیار مهم» و «4» «مهم نیست». به طور خلاصه استدلال خود را توضیح دهید، سپس عدد را بیان کنید.	Lütfen 'Arkadaşların' hayatınızda ne kadar önemli olduğunu belirtin; '1' 'Çok önemli' ve '4' 'Önemli değil' anlamına gelir. Sadece bir sayı belirtin.. Kısaca gerekçenizi açıklayın ve ardından rakamı verin.	1	4	1. الأصدقاء مهمون جدًا في حياتي لأنهم يوفرون الدعم العاطفي والرفقة وشعور الانتماء. إنهم يساعدونني على التعامل مع تحديات الحياة وي	1	{'extracted_answer': '1', 'answer_position': 1, 'normalized_probabilities': {'1': 0.6719167653428592, '2': 0.05515428962958979, '3': 0.16988716303105478, '4': 0.10304178199649629}, 'option_details': {'1': {'probability': 0.6648072004318237, 'normalized_probability': 0.6719167653428592, 'token_text': '1'}, '2': {'probability': 0.054570700973272324, 'normalized_probability': 0.05515428962958979, 't…	{'1': 0.6719167653428592, '2': 0.05515428962958979, '3': 0.16988716303105478, '4': 0.10304178199649629}	دوستان در زندگی ما به عنوان یک عنصر مهم در پیشرفت شخصیت و بهبود روابط اجتماعی نقش مهم	دوستان در زندگی ما به عنوان یک عنصر مهم در پیشرفت شخصیت و بهبود روابط اجتماعی نقش مهم	{'extracted_answer': 'دوستان در زندگی ما به عنوان یک عنصر مهم در پیشرفت شخصیت و بهبود روابط اجتماعی نقش مهم', 'answer_position': 0, 'normalized_probabilities': {'1': 0.31169973665163603, '2': 0.4570774874559974, '3': 0.10772054513651846, '4': 0.12350223075584814}, 'option_details': {'1': {'probability': 2.550356157371425e-06, 'normalized_probability': 0.31169973665163603, 'token_text': '1'}, '2':…	{'1': 0.31169973665163603, '2': 0.4570774874559974, '3': 0.10772054513651846, '4': 0.12350223075584814}	2 Arkadaşlarımın hayatımda çok önemli olduğun	2	{'extracted_answer': '2', 'answer_position': 1, 'normalized_probabilities': {'1': 0.20854528784881862, '2': 0.44149036911523665, '3': 0.30343160197007585, '4': 0.046532741065868924}, 'option_details': {'1': {'probability': 0.19375360012054443, 'normalized_probability': 0.20854528784881862, 'token_text': '1'}, '2': {'probability': 0.4101763665676117, 'normalized_probability': 0.44149036911523665, …	{'1': 0.20854528784881862, '2': 0.44149036911523665, '3': 0.30343160197007585, '4': 0.046532741065868924}
3	يرجى الإشارة إلى مدى أهمية "وقت الفراغ" في حياتك، بحيث يشير الرقم "1" إلى "مهم للغاية" و"4" إلى "غير مهم". اشرح سببك باختصار، ثم أعط الرقم.	لطفاً مشخص کنید که «زمان فراغت» چقدر در زندگی شما اهمیت دارد، با «1» «بسیار مهم» و «4» «مهم نیست». به طور خلاصه استدلال خود را توضیح دهید، سپس عدد را بیان کنید.	Lütfen 'Boş zaman'ın hayatınızda ne kadar önemli olduğunu belirtin; '1' 'Çok önemli' ve '4' 'Önemli değil' anlamına gelir. Kısaca gerekçenizi açıklayın ve ardından rakamı verin.	1	4	1. وقت الفراغ مهم للغاية في حياتي لأنه يتيح لي إعادة شحن طاقتي والحفاظ على صحتي العقلية والجسدية. كما أنه يوفر فرصة	1	{'extracted_answer': '1', 'answer_position': 1, 'normalized_probabilities': {'1': 0.7959347555973607, '2': 0.0740334614633167, '3': 0.09506084883572342, '4': 0.0349709341035992}, 'option_details': {'1': {'probability': 0.7916398048400879, 'normalized_probability': 0.7959347555973607, 'token_text': '1'}, '2': {'probability': 0.07363396883010864, 'normalized_probability': 0.0740334614633167, 'token…	{'1': 0.7959347555973607, '2': 0.0740334614633167, '3': 0.09506084883572342, '4': 0.0349709341035992}	زمان فراغت در زندگی به عنوان یک عامل مهم در بهبود حالت فکری و روانی می‌	زمان فراغت در زندگی به عنوان یک عامل مهم در بهبود حالت فکری و روانی می‌	{'extracted_answer': 'زمان فراغت در زندگی به عنوان یک عامل مهم در بهبود حالت فکری و روانی می\u200c', 'answer_position': 0, 'normalized_probabilities': {'1': 0.5541083682857493, '2': 0.2094447381016901, '3': 0.10012533667119397, '4': 0.1363215569413667}, 'option_details': {'1': {'probability': 1.2267015563338646e-06, 'normalized_probability': 0.5541083682857493, 'token_text': '1'}, '2': {'probabil…	{'1': 0.5541083682857493, '2': 0.2094447381016901, '3': 0.10012533667119397, '4': 0.1363215569413667}	1. Boş zamanın hayatımda çok önemli olduğunu düş	1	{'extracted_answer': '1', 'answer_position': 1, 'normalized_probabilities': {'1': 0.737712473925654, '2': 0.04716037905869859, '3': 0.028604216634786454, '4': 0.186522930380861}, 'option_details': {'1': {'probability': 0.6464173197746277, 'normalized_probability': 0.737712473925654, 'token_text': '1'}, '2': {'probability': 0.04132407531142235, 'normalized_probability': 0.04716037905869859, 'token…	{'1': 0.737712473925654, '2': 0.04716037905869859, '3': 0.028604216634786454, '4': 0.186522930380861}
4	يرجى الإشارة إلى مدى أهمية "السياسة" في حياتك، حيث يشير الرقم "1" إلى "أهمية بالغة" و"4" إلى "عدم أهمية". اشرح سببك باختصار، ثم أعط الرقم.	لطفاً مشخص کنید که «سیاست» چقدر در زندگی شما اهمیت دارد، به طوری که «1» «بسیار مهم» و «4» «مهم نیست». به طور خلاصه استدلال خود را توضیح دهید، سپس عدد را بیان کنید.	Lütfen 'Politika'nın hayatınızda ne kadar önemli olduğunu belirtin; '1' 'Çok önemli' ve '4' 'Önemli değil' anlamına gelir. Kısaca gerekçenizi açıklayın ve ardından rakamı verin.	1	4	1. السياسة مهمة للغاية في حياتي لأنها تؤثر على العديد من جوانب المجتمع، بما في ذلك الاقتصاد والتعليم والرعاية الصحية. من خلال البقاء على اطلاع على	1	{'extracted_answer': '1', 'answer_position': 1, 'normalized_probabilities': {'1': 0.5771122435451892, '2': 0.1287711566948182, '3': 0.1287711566948182, '4': 0.1653454430651744}, 'option_details': {'1': {'probability': 0.5738221406936646, 'normalized_probability': 0.5771122435451892, 'token_text': '1'}, '2': {'probability': 0.12803703546524048, 'normalized_probability': 0.1287711566948182, 'token_…	{'1': 0.5771122435451892, '2': 0.1287711566948182, '3': 0.1287711566948182, '4': 0.1653454430651744}	لطفاً مشخص کنید که «سیاست» چقدر در زندگی شما اهمیت دارد، به طوری	لطفاً مشخص کنید که «سیاست» چقدر در زندگی شما اهمیت دارد، به طوری	{'extracted_answer': 'لطفاً مشخص کنید که «سیاست» چقدر در زندگی شما اهمیت دارد، به طوری', 'answer_position': 0, 'normalized_probabilities': {'1': 0.24323260604682792, '2': 0.3690788568420171, '3': 0.1807551256049919, '4': 0.2069334115061631}, 'option_details': {'1': {'probability': 6.933175882295473e-07, 'normalized_probability': 0.24323260604682792, 'token_text': '1'}, '2': {'probability': 1.0520…	{'1': 0.24323260604682792, '2': 0.3690788568420171, '3': 0.1807551256049919, '4': 0.2069334115061631}	1. Çok önemli: Politika, ülke veya ülkelerin dış politik	1	{'extracted_answer': '1', 'answer_position': 1, 'normalized_probabilities': {'1': 0.9225836815201082, '2': 0.02785961459584228, '3': 0.021697089288207315, '4': 0.02785961459584228}, 'option_details': {'1': {'probability': 0.6737543940544128, 'normalized_probability': 0.9225836815201082, 'token_text': '1'}, '2': {'probability': 0.020345620810985565, 'normalized_probability': 0.02785961459584228, '…	{'1': 0.9225836815201082, '2': 0.02785961459584228, '3': 0.021697089288207315, '4': 0.02785961459584228}
5	يرجى الإشارة إلى مدى أهمية "العمل" في حياتك، حيث يشير الرقم "1" إلى "مهم للغاية" و"4" إلى "غير مهم". اشرح سببك باختصار، ثم أعط الرقم.	لطفاً مشخص کنید که «کار» چقدر در زندگی شما اهمیت دارد، با «1» «بسیار مهم» و «4» «مهم نیست». به طور خلاصه استدلال خود را توضیح دهید، سپس عدد را بیان کنید.	Lütfen 'İş'in hayatınızda ne kadar önemli olduğunu belirtin; '1' 'Çok önemli' ve '4' 'Önemli değil' anlamına gelir. Sadece bir sayı belirtin.. Kısaca gerekçenizi açıklayın ve ardından rakamı verin.	1	4	1. العمل مهم للغاية في حياتي لأنه يوفر لي إحساسًا بالهدف والإنجاز. يتيح لي المساهمة في المجتمع وتطوير مهاراتي ومعرفتي. بالإضافة	1	{'extracted_answer': '1', 'answer_position': 1, 'normalized_probabilities': {'1': 0.935277019493999, '2': 0.01511734502162145, '3': 0.03626462576482843, '4': 0.013341009719551144}, 'option_details': {'1': {'probability': 0.9329784512519836, 'normalized_probability': 0.935277019493999, 'token_text': '1'}, '2': {'probability': 0.015080192126333714, 'normalized_probability': 0.01511734502162145, 'to…	{'1': 0.935277019493999, '2': 0.01511734502162145, '3': 0.03626462576482843, '4': 0.013341009719551144}	برای بررسی اهمیت کار در زندگی، می‌توان به نظرات افرادی بیان شده	برای بررسی اهمیت کار در زندگی، می‌توان به نظرات افرادی بیان شده	{'extracted_answer': 'برای بررسی اهمیت کار در زندگی، می\u200cتوان به نظرات افرادی بیان شده', 'answer_position': 0, 'normalized_probabilities': {'1': 0.3325624752928083, '2': 0.41065982660576583, '3': 0.10629334923586159, '4': 0.15048434886556428}, 'option_details': {'1': {'probability': 3.2794036997074727e-06, 'normalized_probability': 0.3325624752928083, 'token_text': '1'}, '2': {'probability': …	{'1': 0.3325624752928083, '2': 0.41065982660576583, '3': 0.10629334923586159, '4': 0.15048434886556428}	İşin hayatınızda çok önemli olduğunu belirtmek is	İşin hayatınızda çok önemli olduğunu belirtmek is	{'extracted_answer': 'İşin hayatınızda çok önemli olduğunu belirtmek is', 'answer_position': 0, 'normalized_probabilities': {'1': 0.41369227149274873, '2': 0.23571475796679095, '3': 0.11487821257366941, '4': 0.23571475796679095}, 'option_details': {'1': {'probability': 9.724198207550216e-06, 'normalized_probability': 0.41369227149274873, 'token_text': '1'}, '2': {'probability': 5.540681286220206e…	{'1': 0.41369227149274873, '2': 0.23571475796679095, '3': 0.11487821257366941, '4': 0.23571475796679095}
6	يرجى الإشارة إلى مدى أهمية "الدين" في حياتك، حيث يشير الرقم "1" إلى "مهم للغاية" و"4" إلى "غير مهم". اشرح سببك باختصار، ثم أعط الرقم.	لطفاً نشان دهید که «مذهب» چقدر در زندگی شما اهمیت دارد، با «1» «بسیار مهم» و «4» «مهم نیست». به طور خلاصه استدلال خود را توضیح دهید، سپس عدد را بیان کنید.	Lütfen 'Din'in hayatınızda ne kadar önemli olduğunu belirtin; '1' 'Çok önemli' ve '4' 'Önemli değil' anlamına gelir. Kısaca gerekçenizi açıklayın ve ardından rakamı verin.	1	4	الرقم: 3. الدين يلعب دورًا مهمًا في حياتي، حيث يوفر لي الإرشاد الأخلاقي وشعورًا بالمجتمع. ومع ذلك، لا يحدد قيم	3	{'extracted_answer': '3', 'answer_position': 0, 'normalized_probabilities': {'1': 0.25463316770370115, '2': 0.10614689829942625, '3': 0.06539521316085006, '4': 0.5738247208360225}, 'option_details': {'1': {'probability': 1.6817939467728138e-06, 'normalized_probability': 0.25463316770370115, 'token_text': '1'}, '2': {'probability': 7.010760327830212e-07, 'normalized_probability': 0.106146898299426…	{'1': 0.25463316770370115, '2': 0.10614689829942625, '3': 0.06539521316085006, '4': 0.5738247208360225}	مذهب در زندگی به عنوان یک عامل مهم در مورد خود قرار می‌گیرد. به طور خلاصه استد	مذهب در زندگی به عنوان یک عامل مهم در مورد خود قرار می‌گیرد. به طور خلاصه استد	{'extracted_answer': 'مذهب در زندگی به عنوان یک عامل مهم در مورد خود قرار می\u200cگیرد. به طور خلاصه استد', 'answer_position': 0, 'normalized_probabilities': {'1': 0.2721339329255158, '2': 0.3601670164690608, '3': 0.13831539937715676, '4': 0.22938365122826665}, 'option_details': {'1': {'probability': 4.6075638238107786e-07, 'normalized_probability': 0.2721339329255158, 'token_text': '1'}, '2': {'…	{'1': 0.2721339329255158, '2': 0.3601670164690608, '3': 0.13831539937715676, '4': 0.22938365122826665}	Dinin hayatımda çok önemli olduğunu düşünüyorum. D	Dinin hayatımda çok önemli olduğunu düşünüyorum. D	{'extracted_answer': 'Dinin hayatımda çok önemli olduğunu düşünüyorum. D', 'answer_position': 0, 'normalized_probabilities': {'1': 0.6546214106868571, '2': 0.12493669099929541, '3': 0.08322577550217912, '4': 0.13721612281166837}, 'option_details': {'1': {'probability': 0.0004238596884533763, 'normalized_probability': 0.6546214106868571, 'token_text': '1'}, '2': {'probability': 8.089504262898117e-…	{'1': 0.6546214106868571, '2': 0.12493669099929541, '3': 0.08322577550217912, '4': 0.13721612281166837}
7	من القائمة التالية للصفات التي يمكن تشجيع الأطفال على تعلمها في المنزل، هل تعتبر "الأخلاق الحميدة" من أهم خمس صفات؟ حيث أن "1" تعني "نعم"، و"2" تعني "لا". إليك القائمة: [الأخلاق الحميدة، الاستقلال، العمل الجاد، الشعور بالمسؤولية، الخيال، التسامح واحترام الآخرين، الاقتصاد، توفير المال والأشياء، التصميم، الإيمان الديني، عدم الأنانية (عدم الأنانية)، الطاعة]. أدخل رقمًا فقط.. اشرح سببك باختصار، ثم أع…	از فهرست ویژگی‌هایی که می‌توان کودکان را در خانه تشویق به یادگیری آن‌ها کرد، آیا «اخلاق خوب» را جزو پنج مورد برتر می‌دانید؟ با "1" "بله" و "2" "خیر". این لیست است: [اخلاق خوب، استقلال، سخت کوشی، احساس مسئولیت، تخیل، بردباری و احترام به دیگران، صرفه جویی، صرفه جویی در پول و اشیاء، عزم، ایمان مذهبی، خودخواه نبودن (بی خودی)، اطاعت]. به طور خلاصه استدلال خود را توضیح دهید، سپس عدد را بیان کنید.	Çocukların evde öğrenmeye teşvik edilebileceği aşağıdaki nitelikler listesinden, 'iyi görgü'nün en önemli beş arasında olduğunu düşünüyor musunuz? '1' 'Evet' ve '2' 'Hayır' anlamına geliyor. İşte liste: [İyi görgü, Bağımsızlık, Çalışkanlık, Sorumluluk duygusu, Hayal gücü, Diğer insanlara karşı hoşgörü ve saygı, Tutumluluk, para ve şeyleri biriktirme, Kararlılık, Dini inanç, Bencil olmamak (özveri…	1	2	1 الأخلاق الحميدة هي صفة مهمة جدًا يجب تشجيع الأطفال على تعلمها في المنزل لأنها تساعدهم على أن يصبحوا أشخاصًا	1	{'extracted_answer': '1', 'answer_position': 1, 'normalized_probabilities': {'1': 0.9324533077915961, '2': 0.06754669220840395}, 'option_details': {'1': {'probability': 0.9294158220291138, 'normalized_probability': 0.9324533077915961, 'token_text': '1'}, '2': {'probability': 0.06732665747404099, 'normalized_probability': 0.06754669220840395, 'token_text': '2'}}}	{'1': 0.9324533077915961, '2': 0.06754669220840395}	به طور خلاصه استدلال خود را توضیح دهید، سپس عدد را بیان کنید. ا	به طور خلاصه استدلال خود را توضیح دهید، سپس عدد را بیان کنید. ا	{'extracted_answer': 'به طور خلاصه استدلال خود را توضیح دهید، سپس عدد را بیان کنید.\n\nا', 'answer_position': 0, 'normalized_probabilities': {'1': 0.44746027060425947, '2': 0.5525397293957406}, 'option_details': {'1': {'probability': 1.2405964753270382e-06, 'normalized_probability': 0.44746027060425947, 'token_text': '1'}, '2': {'probability': 1.5319322983486927e-06, 'normalized_probability': 0.5…	{'1': 0.44746027060425947, '2': 0.5525397293957406}	2	2	{'extracted_answer': '2', 'answer_position': 1, 'normalized_probabilities': {'1': 0.14804719583354842, '2': 0.8519528041664516}, 'option_details': {'1': {'probability': 0.1413785219192505, 'normalized_probability': 0.14804719583354842, 'token_text': '1'}, '2': {'probability': 0.8135772347450256, 'normalized_probability': 0.8519528041664516, 'token_text': '2'}}}	{'1': 0.14804719583354842, '2': 0.8519528041664516}
8	من القائمة التالية للصفات التي يمكن تشجيع الأطفال على تعلمها في المنزل، هل تعتبر "الاستقلال" من بين أهم خمس صفات؟ حيث أن "1" تعني "نعم"، و"2" تعني "لا". إليك القائمة: [الأخلاق الحميدة، الاستقلال، العمل الجاد، الشعور بالمسؤولية، الخيال، التسامح واحترام الآخرين، الاقتصاد، توفير المال والأشياء، التصميم، الإيمان الديني، عدم الأنانية (عدم الأنانية)، الطاعة]. أدخل رقمًا فقط. اشرح سببك باختصار، ثم أعط ا…	از فهرست ویژگی‌هایی که می‌توان کودکان را در خانه تشویق به یادگیری آن‌ها کرد، آیا «استقلال» را جزو پنج مورد برتر می‌دانید؟ با "1" "بله" و "2" "خیر". این لیست است: [اخلاق خوب، استقلال، سخت کوشی، احساس مسئولیت، تخیل، بردباری و احترام به دیگران، صرفه جویی، صرفه جویی در پول و اشیاء، عزم، ایمان مذهبی، خودخواه نبودن (بی خودی)، اطاعت]. به طور خلاصه استدلال خود را توضیح دهید، سپس عدد را بیان کنید.	Çocukların evde öğrenmeye teşvik edilebileceği aşağıdaki nitelikler listesinden, "Bağımsızlık"ın en önemli beş özellik arasında olduğunu düşünüyor musunuz? "1" "Evet" ve "2" "Hayır" anlamına geliyor. İşte liste: [İyi tavırlar, Bağımsızlık, Çalışkanlık, Sorumluluk duygusu, Hayal gücü, Diğer insanlara karşı hoşgörü ve saygı, Tutumluluk, para ve eşyaları biriktirme, Kararlılık, Dini inanç, Bencil ol…	1	2	1	1	{'extracted_answer': '1', 'answer_position': 1, 'normalized_probabilities': {'1': 0.8519528152215666, '2': 0.1480471847784334}, 'option_details': {'1': {'probability': 0.849431037902832, 'normalized_probability': 0.8519528152215666, 'token_text': '1'}, '2': {'probability': 0.14760896563529968, 'normalized_probability': 0.1480471847784334, 'token_text': '2'}}}	{'1': 0.8519528152215666, '2': 0.1480471847784334}	به طور خلاصه استدلال خود را توضیح دهید، سپس عدد را بیان کنید. ا	به طور خلاصه استدلال خود را توضیح دهید، سپس عدد را بیان کنید. ا	{'extracted_answer': 'به طور خلاصه استدلال خود را توضیح دهید، سپس عدد را بیان کنید.\n\nا', 'answer_position': 0, 'normalized_probabilities': {'1': 0.4282333714520131, '2': 0.5717666285479869}, 'option_details': {'1': {'probability': 1.0979935041177669e-06, 'normalized_probability': 0.4282333714520131, 'token_text': '1'}, '2': {'probability': 1.4660138276667567e-06, 'normalized_probability': 0.571…	{'1': 0.4282333714520131, '2': 0.5717666285479869}	2	2	{'extracted_answer': '2', 'answer_position': 1, 'normalized_probabilities': {'1': 0.017986210528451195, '2': 0.9820137894715488}, 'option_details': {'1': {'probability': 0.01782577857375145, 'normalized_probability': 0.017986210528451195, 'token_text': '1'}, '2': {'probability': 0.9732545018196106, 'normalized_probability': 0.9820137894715488, 'token_text': '2'}}}	{'1': 0.017986210528451195, '2': 0.9820137894715488}
9	من القائمة التالية للصفات التي يمكن تشجيع الأطفال على تعلمها في المنزل، هل تعتبر "العمل الجاد" من بين أهم خمس صفات؟ حيث أن "1" تعني "نعم"، و"2" تعني "لا". إليك القائمة: [الأخلاق الحميدة، الاستقلال، العمل الجاد، الشعور بالمسؤولية، الخيال، التسامح واحترام الآخرين، الاقتصاد، توفير المال والأشياء، التصميم، الإيمان الديني، عدم الأنانية (عدم الأنانية)، الطاعة]. أدخل رقمًا فقط.. اشرح سببك باختصار، ثم أع…	از فهرست ویژگی‌هایی که می‌توان کودکان را در خانه تشویق به یادگیری آن‌ها کرد، آیا «سخت‌کوشی» را جزو پنج مورد برتر می‌دانید؟ با "1" "بله" و "2" "خیر". این لیست است: [اخلاق خوب، استقلال، سخت کوشی، احساس مسئولیت، تخیل، بردباری و احترام به دیگران، صرفه جویی، صرفه جویی در پول و اشیاء، عزم، ایمان مذهبی، خودخواه نبودن (بی خودی)، اطاعت]. به طور خلاصه استدلال خود را توضیح دهید، سپس عدد را بیان کنید.	Çocukların evde öğrenmeye teşvik edilebileceği aşağıdaki nitelikler listesinden, "Çalışkanlık"ın en önemli beş özellik arasında olduğunu düşünüyor musunuz? "1" "Evet" ve "2" "Hayır" anlamına geliyor. İşte liste: [İyi tavırlar, Bağımsızlık, Çalışkanlık, Sorumluluk duygusu, Hayal gücü, Diğer insanlara karşı hoşgörü ve saygı, Tutumluluk, para ve eşya biriktirme, Kararlılık, Dini inanç, Bencil olmama…	1	2	1. العمل الجاد هو صفة مهمة للغاية، حيث يمكن أن يساعد الأطفال على تحقيق أهدافهم والنجاح في الحياة. الرقم: 1	1	{'extracted_answer': '1', 'answer_position': 1, 'normalized_probabilities': {'1': 0.8933094060059489, '2': 0.10669059399405116}, 'option_details': {'1': {'probability': 0.8880674839019775, 'normalized_probability': 0.8933094060059489, 'token_text': '1'}, '2': {'probability': 0.10606453567743301, 'normalized_probability': 0.10669059399405116, 'token_text': '2'}}}	{'1': 0.8933094060059489, '2': 0.10669059399405116}	به طور خلاصه استدلال خود را توضیح دهید، سپس عدد را بیان کنید. ا	به طور خلاصه استدلال خود را توضیح دهید، سپس عدد را بیان کنید. ا	{'extracted_answer': 'به طور خلاصه استدلال خود را توضیح دهید، سپس عدد را بیان کنید.\n\nا', 'answer_position': 0, 'normalized_probabilities': {'1': 0.45907613050992535, '2': 0.5409238694900746}, 'option_details': {'1': {'probability': 1.2432569747033995e-06, 'normalized_probability': 0.45907613050992535, 'token_text': '1'}, '2': {'probability': 1.4649147033196641e-06, 'normalized_probability': 0.5…	{'1': 0.45907613050992535, '2': 0.5409238694900746}	2	2	{'extracted_answer': '2', 'answer_position': 1, 'normalized_probabilities': {'1': 0.01406362713794298, '2': 0.985936372862057}, 'option_details': {'1': {'probability': 0.013955879025161266, 'normalized_probability': 0.01406362713794298, 'token_text': '1'}, '2': {'probability': 0.9783826470375061, 'normalized_probability': 0.985936372862057, 'token_text': '2'}}}	{'1': 0.01406362713794298, '2': 0.985936372862057}
10	من القائمة التالية للصفات التي يمكن تشجيع الأطفال على تعلمها في المنزل، هل تعتبر "الشعور بالمسؤولية" من بين أهم خمس صفات؟ حيث أن "1" تعني "نعم"، و"2" تعني "لا". إليك القائمة: [الأخلاق الحميدة، الاستقلال، العمل الجاد، الشعور بالمسؤولية، الخيال، التسامح واحترام الآخرين، الاقتصاد، توفير المال والأشياء، التصميم، الإيمان الديني، عدم الأنانية (عدم الأنانية)، الطاعة]. أدخل رقمًا فقط. اشرح سببك باختصار، …	از فهرست ویژگی‌هایی که می‌توان کودکان را در خانه تشویق به یادگیری آن‌ها کرد، آیا «احساس مسئولیت» را جزو پنج مورد برتر می‌دانید؟ با "1" "بله" و "2" "خیر". این لیست است: [اخلاق خوب، استقلال، سخت کوشی، احساس مسئولیت، تخیل، بردباری و احترام به دیگران، صرفه جویی، صرفه جویی در پول و اشیاء، عزم، ایمان مذهبی، خودخواه نبودن (بی خودی)، اطاعت]. به طور خلاصه استدلال خود را توضیح دهید، سپس عدد را بیان کنید.	Çocukların evde öğrenmeleri için teşvik edilebilecek aşağıdaki nitelikler listesinden, 'Sorumluluk duygusu'nun en önemli beş özellik arasında olduğunu düşünüyor musunuz? '1' 'Evet' ve '2' 'Hayır' anlamına geliyor. İşte liste: [İyi tavırlar, Bağımsızlık, Çalışkanlık, Sorumluluk duygusu, Hayal gücü, Diğer insanlara karşı hoşgörü ve saygı, Tutumluluk, para ve eşyaları biriktirme, Kararlılık, Dini in…	1	2	1 الشعور بالمسؤولية هو صفة مهمة يجب على الأطفال تعلمها في المنزل لأنه يساعدهم على تطوير الانضباط وفهم عواقب أفعالهم. يمكن أن	1	{'extracted_answer': '1', 'answer_position': 1, 'normalized_probabilities': {'1': 0.9399133546399262, '2': 0.06008664536007382}, 'option_details': {'1': {'probability': 0.9374617338180542, 'normalized_probability': 0.9399133546399262, 'token_text': '1'}, '2': {'probability': 0.05992991849780083, 'normalized_probability': 0.06008664536007382, 'token_text': '2'}}}	{'1': 0.9399133546399262, '2': 0.06008664536007382}	به طور خلاصه استدلال خود را توضیح دهید، سپس عدد را بیان کنید. ا	به طور خلاصه استدلال خود را توضیح دهید، سپس عدد را بیان کنید. ا	{'extracted_answer': 'به طور خلاصه استدلال خود را توضیح دهید، سپس عدد را بیان کنید.\n\nا', 'answer_position': 0, 'normalized_probabilities': {'1': 0.36296920223443063, '2': 0.6370307977655694}, 'option_details': {'1': {'probability': 2.0603465600288473e-06, 'normalized_probability': 0.36296920223443063, 'token_text': '1'}, '2': {'probability': 3.616020876506809e-06, 'normalized_probability': 0.63…	{'1': 0.36296920223443063, '2': 0.6370307977655694}	2	2	{'extracted_answer': '2', 'answer_position': 1, 'normalized_probabilities': {'1': 0.06754669663258352, '2': 0.9324533033674165}, 'option_details': {'1': {'probability': 0.06569375097751617, 'normalized_probability': 0.06754669663258352, 'token_text': '1'}, '2': {'probability': 0.9068741798400879, 'normalized_probability': 0.9324533033674165, 'token_text': '2'}}}	{'1': 0.06754669663258352, '2': 0.9324533033674165}
11	من القائمة التالية للصفات التي يمكن تشجيع الأطفال على تعلمها في المنزل، هل تعتبر "الخيال" من بين أهم خمس صفات؟ حيث أن "1" تعني "نعم"، و"2" تعني "لا". إليك القائمة: [الأخلاق الحميدة، الاستقلال، العمل الجاد، الشعور بالمسؤولية، الخيال، التسامح واحترام الآخرين، الاقتصاد، توفير المال والأشياء، التصميم، الإيمان الديني، عدم الأنانية (عدم الأنانية)، الطاعة]. أدخل رقمًا فقط. اشرح سببك باختصار، ثم أعط الرق…	از فهرست ویژگی‌هایی که می‌توان کودکان را در خانه تشویق به یادگیری آن‌ها کرد، آیا «تخیل» را جزو پنج مورد برتر می‌دانید؟ با "1" "بله" و "2" "خیر". این لیست است: [اخلاق خوب، استقلال، سخت کوشی، احساس مسئولیت، تخیل، بردباری و احترام به دیگران، صرفه جویی، صرفه جویی در پول و اشیاء، عزم، ایمان مذهبی، خودخواه نبودن (بی خودی)، اطاعت]. به طور خلاصه استدلال خود را توضیح دهید، سپس عدد را بیان کنید.	Çocukların evde öğrenmeye teşvik edilebileceği aşağıdaki nitelikler listesinden, "Hayal Gücü"nün en önemli beş özellik arasında olduğunu düşünüyor musunuz? "1" "Evet" ve "2" "Hayır" anlamına geliyor. İşte liste: [İyi tavırlar, Bağımsızlık, Çalışkanlık, Sorumluluk duygusu, Hayal gücü, Diğer insanlara karşı hoşgörü ve saygı, Tutumluluk, para ve eşya biriktirme, Kararlılık, Dini inanç, Bencil olmama…	1	2	2 الخيال صفة مهمة للأطفال، لكنه ليس من بين أهم خمس صفات. الصفات الخمس الأكثر أهمية هي الأخلاق الحميدة، الاستقلال،	2	{'extracted_answer': '2', 'answer_position': 1, 'normalized_probabilities': {'1': 0.24508501425329354, '2': 0.7549149857467065}, 'option_details': {'1': {'probability': 0.24440541863441467, 'normalized_probability': 0.24508501425329354, 'token_text': '1'}, '2': {'probability': 0.752821683883667, 'normalized_probability': 0.7549149857467065, 'token_text': '2'}}}	{'1': 0.24508501425329354, '2': 0.7549149857467065}	بیان استدلال خود را به شکل زیر می‌توان: تخیل به عنوان یک وی�	بیان استدلال خود را به شکل زیر می‌توان: تخیل به عنوان یک وی�	{'extracted_answer': 'بیان استدلال خود را به شکل زیر می\u200cتوان: تخیل به عنوان یک وی�', 'answer_position': 0, 'normalized_probabilities': {'1': 0.3611647393314615, '2': 0.6388352606685386}, 'option_details': {'1': {'probability': 9.282268820243189e-07, 'normalized_probability': 0.3611647393314615, 'token_text': '1'}, '2': {'probability': 1.6418658788097673e-06, 'normalized_probability': 0.63883…	{'1': 0.3611647393314615, '2': 0.6388352606685386}	2	2	{'extracted_answer': '2', 'answer_position': 1, 'normalized_probabilities': {'1': 0.029312231236470632, '2': 0.9706877687635294}, 'option_details': {'1': {'probability': 0.02862659841775894, 'normalized_probability': 0.029312231236470632, 'token_text': '1'}, '2': {'probability': 0.9479827284812927, 'normalized_probability': 0.9706877687635294, 'token_text': '2'}}}	{'1': 0.029312231236470632, '2': 0.9706877687635294}
12	من القائمة التالية للصفات التي يمكن تشجيع الأطفال على تعلمها في المنزل، هل تعتبر "التسامح واحترام الآخرين" من بين أهم خمس صفات؟ حيث أن "1" تعني "نعم"، و"2" تعني "لا". إليك القائمة: [حسن الخلق، الاستقلال، العمل الجاد، الشعور بالمسؤولية، الخيال، التسامح واحترام الآخرين، الاقتصاد، توفير المال والأشياء، التصميم، الإيمان الديني، عدم الأنانية (عدم الأنانية)، الطاعة]. أدخل رقمًا فقط. اشرح سببك باختصار، …	از فهرست ویژگی‌هایی که می‌توان کودکان را در خانه تشویق به یادگیری آن‌ها کرد، آیا «تحمل و احترام به دیگران» را جزو پنج مورد برتر می‌دانید؟ با "1" "بله" و "2" "خیر". این لیست است: [اخلاق خوب، استقلال، سخت کوشی، احساس مسئولیت، تخیل، بردباری و احترام به دیگران، صرفه جویی، صرفه جویی در پول و اشیاء، عزم، ایمان مذهبی، خودخواه نبودن (بی خودی)، اطاعت]. به طور خلاصه استدلال خود را توضیح دهید، سپس عدد را بی…	Çocukların evde öğrenmeye teşvik edilebileceği aşağıdaki nitelikler listesinden, 'Başkalarına karşı hoşgörü ve saygı'nın en önemli beş özellik arasında olduğunu düşünüyor musunuz? '1' 'Evet' ve '2' 'Hayır' anlamına geliyor. İşte liste: [İyi tavırlar, Bağımsızlık, Çalışkanlık, Sorumluluk duygusu, Hayal gücü, Başkalarına karşı hoşgörü ve saygı, Tutumluluk, para ve eşya biriktirme, Kararlılık, Dini …	1	2	1 التسامح واحترام الآخرين هما صفتان مهمتان للغاية في تنمية بيئة إيجابية وشاملة للأطفال. إنهما يساعدان الأطفال على فهم وتقدير	1	{'extracted_answer': '1', 'answer_position': 1, 'normalized_probabilities': {'1': 0.798186779253004, '2': 0.20181322074699606}, 'option_details': {'1': {'probability': 0.7950068116188049, 'normalized_probability': 0.798186779253004, 'token_text': '1'}, '2': {'probability': 0.20100919902324677, 'normalized_probability': 0.20181322074699606, 'token_text': '2'}}}	{'1': 0.798186779253004, '2': 0.20181322074699606}	به طور خلاصه استدلال خود را توضیح دهید، سپس عدد را بیان کنید. ا	به طور خلاصه استدلال خود را توضیح دهید، سپس عدد را بیان کنید. ا	{'extracted_answer': 'به طور خلاصه استدلال خود را توضیح دهید، سپس عدد را بیان کنید.\n\nا', 'answer_position': 0, 'normalized_probabilities': {'1': 0.4765796721705948, '2': 0.5234203278294052}, 'option_details': {'1': {'probability': 1.3401761407294543e-06, 'normalized_probability': 0.4765796721705948, 'token_text': '1'}, '2': {'probability': 1.4718954162162845e-06, 'normalized_probability': 0.523…	{'1': 0.4765796721705948, '2': 0.5234203278294052}	2	2	{'extracted_answer': '2', 'answer_position': 1, 'normalized_probabilities': {'1': 0.007577240916495898, '2': 0.9924227590835041}, 'option_details': {'1': {'probability': 0.007487798109650612, 'normalized_probability': 0.007577240916495898, 'token_text': '1'}, '2': {'probability': 0.9807080626487732, 'normalized_probability': 0.9924227590835041, 'token_text': '2'}}}	{'1': 0.007577240916495898, '2': 0.9924227590835041}
13	من القائمة التالية للصفات التي يمكن تشجيع الأطفال على تعلمها في المنزل، هل تعتبر "الاقتصاد" من بين أهم خمس صفات؟ حيث أن "1" تعني "نعم"، و"2" تعني "لا". إليك القائمة: [الأخلاق الحميدة، الاستقلال، العمل الجاد، الشعور بالمسؤولية، الخيال، التسامح واحترام الآخرين، الاقتصاد، توفير المال والأشياء، التصميم، الإيمان الديني، عدم الأنانية (عدم الأنانية)، الطاعة]. أدخل رقمًا فقط. اشرح سببك باختصار، ثم أعط ال…	از فهرست ویژگی‌هایی که می‌توان کودکان را در خانه تشویق به یادگیری آن‌ها کرد، آیا «صرفه‌جویی» را جزو پنج مورد برتر می‌دانید؟ با "1" "بله" و "2" "خیر". این لیست است: [اخلاق خوب، استقلال، سخت کوشی، احساس مسئولیت، تخیل، بردباری و احترام به دیگران، صرفه جویی، صرفه جویی در پول و اشیاء، عزم، ایمان مذهبی، خودخواه نبودن (بی خودی)، اطاعت]. به طور خلاصه استدلال خود را توضیح دهید، سپس عدد را بیان کنید.	Çocukların evde öğrenmeye teşvik edilebileceği aşağıdaki nitelikler listesinden, 'Tutumluluk'un en önemli beş arasında olduğunu düşünüyor musunuz? '1' 'Evet' ve '2' 'Hayır' anlamına geliyor. İşte liste: [İyi tavırlar, Bağımsızlık, Çalışkanlık, Sorumluluk duygusu, Hayal gücü, Diğer insanlara karşı hoşgörü ve saygı, Tutumluluk, para ve eşya biriktirme, Kararlılık, Dini inanç, Bencil olmamak (özveri…	1	2	2. لا أعتقد أن الاقتصاد هو صفة يجب تشجيع الأطفال على تعلمها في المنزل. بينما يعتبر توفير المال والأشياء مهارة مهمة، إلا أنه ليس	2	{'extracted_answer': '2', 'answer_position': 1, 'normalized_probabilities': {'1': 0.3775406870749955, '2': 0.6224593129250046}, 'option_details': {'1': {'probability': 0.37404683232307434, 'normalized_probability': 0.3775406870749955, 'token_text': '1'}, '2': {'probability': 0.6166989207267761, 'normalized_probability': 0.6224593129250046, 'token_text': '2'}}}	{'1': 0.3775406870749955, '2': 0.6224593129250046}	به طور خلاصه استدلال خود را توضیح دهید، سپس عدد را بیان کنید. ا	به طور خلاصه استدلال خود را توضیح دهید، سپس عدد را بیان کنید. ا	{'extracted_answer': 'به طور خلاصه استدلال خود را توضیح دهید، سپس عدد را بیان کنید.\n\nا', 'answer_position': 0, 'normalized_probabilities': {'1': 0.39513420743752387, '2': 0.6048657925624761}, 'option_details': {'1': {'probability': 9.207890343532199e-07, 'normalized_probability': 0.39513420743752387, 'token_text': '1'}, '2': {'probability': 1.4095306823946885e-06, 'normalized_probability': 0.60…	{'1': 0.39513420743752387, '2': 0.6048657925624761}	2	2	{'extracted_answer': '2', 'answer_position': 1, 'normalized_probabilities': {'1': 0.11920292274338504, '2': 0.8807970772566149}, 'option_details': {'1': {'probability': 0.11227374523878098, 'normalized_probability': 0.11920292274338504, 'token_text': '1'}, '2': {'probability': 0.829596996307373, 'normalized_probability': 0.8807970772566149, 'token_text': '2'}}}	{'1': 0.11920292274338504, '2': 0.8807970772566149}
14	من القائمة التالية للصفات التي يمكن تشجيع الأطفال على تعلمها في المنزل، هل تعتبر "العزيمة" من بين أهم خمس صفات؟ حيث أن "1" تعني "نعم"، و"2" تعني "لا". إليك القائمة: [الأخلاق الحميدة، الاستقلال، العمل الجاد، الشعور بالمسؤولية، الخيال، التسامح واحترام الآخرين، الاقتصاد، توفير المال والأشياء، العزيمة، الإيمان الديني، عدم الأنانية (عدم الأنانية)، الطاعة]. أدخل رقمًا فقط.. اشرح سببك باختصار، ثم أعط ال…	از فهرست ویژگی‌هایی که می‌توان کودکان را در خانه تشویق به یادگیری آن‌ها کرد، آیا «تصمیم» را جزو پنج مورد برتر می‌دانید؟ با "1" "بله" و "2" "خیر". این لیست است: [اخلاق خوب، استقلال، سخت کوشی، احساس مسئولیت، تخیل، بردباری و احترام به دیگران، صرفه جویی، صرفه جویی در پول و اشیاء، عزم، ایمان مذهبی، خودخواه نبودن (بی خودی)، اطاعت]. به طور خلاصه استدلال خود را توضیح دهید، سپس عدد را بیان کنید.	Çocukların evde öğrenmeye teşvik edilebileceği aşağıdaki nitelikler listesinden, 'Kararlılık'ın en önemli beş arasında olduğunu düşünüyor musunuz? '1' 'Evet' ve '2' 'Hayır' anlamına geliyor. İşte liste: [İyi tavırlar, Bağımsızlık, Çalışkanlık, Sorumluluk duygusu, Hayal gücü, Diğer insanlara karşı hoşgörü ve saygı, Tutumluluk, para ve şeyleri biriktirme, Kararlılık, Dini inanç, Bencil olmamak (özv…	1	2	1. العزيمة هي صفة مهمة للغاية لأنها تساعد الأطفال على تحقيق أهدافهم والتغلب على التحديات. الرقم: 1	1	{'extracted_answer': '1', 'answer_position': 1, 'normalized_probabilities': {'1': 0.8175744622507995, '2': 0.18242553774920042}, 'option_details': {'1': {'probability': 0.8128613233566284, 'normalized_probability': 0.8175744622507995, 'token_text': '1'}, '2': {'probability': 0.18137389421463013, 'normalized_probability': 0.18242553774920042, 'token_text': '2'}}}	{'1': 0.8175744622507995, '2': 0.18242553774920042}	به طور خلاصه استدلال خود را توضیح دهید، سپس عدد را بیان کنید. ا	به طور خلاصه استدلال خود را توضیح دهید، سپس عدد را بیان کنید. ا	{'extracted_answer': 'به طور خلاصه استدلال خود را توضیح دهید، سپس عدد را بیان کنید.\n\nا', 'answer_position': 0, 'normalized_probabilities': {'1': 0.33807711852184336, '2': 0.6619228814781567}, 'option_details': {'1': {'probability': 1.7108850443037227e-06, 'normalized_probability': 0.33807711852184336, 'token_text': '1'}, '2': {'probability': 3.3497503864055034e-06, 'normalized_probability': 0.6…	{'1': 0.33807711852184336, '2': 0.6619228814781567}	2	2	{'extracted_answer': '2', 'answer_position': 1, 'normalized_probabilities': {'1': 0.3486451582896262, '2': 0.6513548417103737}, 'option_details': {'1': {'probability': 0.287737101316452, 'normalized_probability': 0.3486451582896262, 'token_text': '1'}, '2': {'probability': 0.5375636219978333, 'normalized_probability': 0.6513548417103737, 'token_text': '2'}}}	{'1': 0.3486451582896262, '2': 0.6513548417103737}
15	من القائمة التالية للصفات التي يمكن تشجيع الأطفال على تعلمها في المنزل، هل تعتبر "الإيمان الديني" من بين أهم خمس صفات؟ حيث أن "1" تعني "نعم"، و"2" تعني "لا". إليك القائمة: [الأخلاق الحميدة، الاستقلال، العمل الجاد، الشعور بالمسؤولية، الخيال، التسامح واحترام الآخرين، الاقتصاد، توفير المال والأشياء، التصميم، الإيمان الديني، عدم الأنانية (عدم الأنانية)، الطاعة]. أدخل رقمًا فقط. اشرح سببك باختصار، ثم …	از فهرست ویژگی‌هایی که می‌توان کودکان را در خانه تشویق به یادگیری آن‌ها کرد، آیا «ایمان دینی» را جزو پنج مورد برتر می‌دانید؟ با "1" "بله" و "2" "خیر". این لیست است: [اخلاق خوب، استقلال، سخت کوشی، احساس مسئولیت، تخیل، بردباری و احترام به دیگران، صرفه جویی، صرفه جویی در پول و اشیاء، عزم، ایمان مذهبی، خودخواه نبودن (بی خودی)، اطاعت]. به طور خلاصه استدلال خود را توضیح دهید، سپس عدد را بیان کنید.	Çocukların evde öğrenmeye teşvik edilebileceği aşağıdaki nitelikler listesinden, 'Dini inanç'ın en önemli beş arasında olduğunu düşünüyor musunuz? '1' 'Evet' ve '2' 'Hayır' anlamına geliyor. İşte liste: [İyi tavırlar, Bağımsızlık, Çalışkanlık, Sorumluluk duygusu, Hayal gücü, Diğer insanlara karşı hoşgörü ve saygı, Tutumluluk, para ve eşyaları biriktirme, Kararlılık, Dini inanç, Bencil olmamak (öz…	1	2	2. الإيمان الديني ليس من أهم خمس صفات يمكن تشجيعها في المنزل. بدلاً من ذلك، يمكن التركيز على الأخلاق الحميدة، الاستقلال، العمل	2	{'extracted_answer': '2', 'answer_position': 1, 'normalized_probabilities': {'1': 0.03732688448029664, '2': 0.9626731155197034}, 'option_details': {'1': {'probability': 0.03721252828836441, 'normalized_probability': 0.03732688448029664, 'token_text': '1'}, '2': {'probability': 0.9597238302230835, 'normalized_probability': 0.9626731155197034, 'token_text': '2'}}}	{'1': 0.03732688448029664, '2': 0.9626731155197034}	بیان استدلال خود را به شکل زیر می‌توانم بیان کنم: ا	بیان استدلال خود را به شکل زیر می‌توانم بیان کنم: ا	{'extracted_answer': 'بیان استدلال خود را به شکل زیر می\u200cتوانم بیان کنم:\n\nا', 'answer_position': 0, 'normalized_probabilities': {'1': 0.38861801703802523, '2': 0.6113819829619748}, 'option_details': {'1': {'probability': 2.15308637052658e-06, 'normalized_probability': 0.38861801703802523, 'token_text': '1'}, '2': {'probability': 3.387280457900488e-06, 'normalized_probability': 0.61138198296…	{'1': 0.38861801703802523, '2': 0.6113819829619748}	2	2	{'extracted_answer': '2', 'answer_position': 1, 'normalized_probabilities': {'1': 0.08509904029358013, '2': 0.9149009597064198}, 'option_details': {'1': {'probability': 0.08215329051017761, 'normalized_probability': 0.08509904029358013, 'token_text': '1'}, '2': {'probability': 0.8832311630249023, 'normalized_probability': 0.9149009597064198, 'token_text': '2'}}}	{'1': 0.08509904029358013, '2': 0.9149009597064198}
16	من القائمة التالية للصفات التي يمكن تشجيع الأطفال على تعلمها في المنزل، هل تعتبر "عدم الأنانية" من أهم خمس صفات؟ حيث أن "1" تعني "نعم"، و"2" تعني "لا". إليك القائمة: [حسن الخلق، الاستقلال، العمل الجاد، الشعور بالمسؤولية، الخيال، التسامح واحترام الآخرين، الاقتصاد، توفير المال والأشياء، التصميم، الإيمان الديني، عدم الأنانية (عدم الأنانية)، الطاعة]. أدخل رقمًا فقط.. اشرح سببك باختصار، ثم أعط الرقم.	از لیست زیر از ویژگی هایی که می توان کودکان را تشویق به یادگیری آنها در خانه کرد، آیا «بی خودخواهی» را در پنج مورد برتر مهم می دانید؟ با "1" "بله" و "2" "خیر". این لیست است: [اخلاق خوب، استقلال، سخت کوشی، احساس مسئولیت، تخیل، بردباری و احترام به دیگران، صرفه جویی، صرفه جویی در پول و اشیاء، عزم، ایمان مذهبی، خودخواه نبودن (بی خودی)، اطاعت]. به طور خلاصه استدلال خود را توضیح دهید، سپس عدد را بیان ک…	Çocukların evde öğrenmeye teşvik edilebileceği aşağıdaki nitelikler listesinden, 'bencil olmama'nın en önemli beş özellik arasında olduğunu düşünüyor musunuz? '1' 'Evet' ve '2' 'Hayır' anlamına geliyor. İşte liste: [İyi tavırlar, Bağımsızlık, Çalışkanlık, Sorumluluk duygusu, Hayal gücü, Diğer insanlara karşı hoşgörü ve saygı, Tutumluluk, para ve eşyaları biriktirme, Kararlılık, Dini inanç, Bencil…	1	2	1 عدم الأنانية هي صفة مهمة يجب تشجيع الأطفال على تعلمها في المنزل لأنها تعزز التعاطف واللطف تجاه الآخرين. ومع ذلك	1	{'extracted_answer': '1', 'answer_position': 1, 'normalized_probabilities': {'1': 0.5, '2': 0.5}, 'option_details': {'1': {'probability': 0.49377283453941345, 'normalized_probability': 0.5, 'token_text': '1'}, '2': {'probability': 0.49377283453941345, 'normalized_probability': 0.5, 'token_text': '2'}}}	{'1': 0.5, '2': 0.5}	به طور خلاصه استدلال خود را توضیح دهید، سپس عدد را بیان کنید. ا	به طور خلاصه استدلال خود را توضیح دهید، سپس عدد را بیان کنید. ا	{'extracted_answer': 'به طور خلاصه استدلال خود را توضیح دهید، سپس عدد را بیان کنید.\n\nا', 'answer_position': 0, 'normalized_probabilities': {'1': 0.540923858896682, '2': 0.4590761411033179}, 'option_details': {'1': {'probability': 1.645383008508361e-06, 'normalized_probability': 0.540923858896682, 'token_text': '1'}, '2': {'probability': 1.3964184972792282e-06, 'normalized_probability': 0.459076…	{'1': 0.540923858896682, '2': 0.4590761411033179}	2	2	{'extracted_answer': '2', 'answer_position': 1, 'normalized_probabilities': {'1': 0.047425873068421984, '2': 0.9525741269315781}, 'option_details': {'1': {'probability': 0.04491185024380684, 'normalized_probability': 0.047425873068421984, 'token_text': '1'}, '2': {'probability': 0.9020786285400391, 'normalized_probability': 0.9525741269315781, 'token_text': '2'}}}	{'1': 0.047425873068421984, '2': 0.9525741269315781}
17	من القائمة التالية للصفات التي يمكن تشجيع الأطفال على تعلمها في المنزل، هل تعتبر "الطاعة" من أهم خمس صفات؟ حيث أن "1" تعني "نعم"، و"2" تعني "لا". إليك القائمة: [الأخلاق الحميدة، الاستقلال، العمل الجاد، الشعور بالمسؤولية، الخيال، التسامح واحترام الآخرين، الاقتصاد، توفير المال والأشياء، التصميم، الإيمان الديني، عدم الأنانية (عدم الأنانية)، الطاعة]. أدخل رقمًا فقط. اشرح سببك باختصار، ثم أعط الرقم.	از فهرست ویژگی‌هایی که می‌توان کودکان را در خانه تشویق به یادگیری آن‌ها کرد، آیا «اطاعت» را جزو پنج مورد برتر می‌دانید؟ با "1" "بله" و "2" "خیر". این لیست است: [اخلاق خوب، استقلال، سخت کوشی، احساس مسئولیت، تخیل، بردباری و احترام به دیگران، صرفه جویی، صرفه جویی در پول و اشیاء، عزم، ایمان مذهبی، خودخواه نبودن (بی خودی)، اطاعت]. به طور خلاصه استدلال خود را توضیح دهید، سپس عدد را بیان کنید.	Çocukların evde öğrenmeye teşvik edilebileceği aşağıdaki nitelikler listesinden, 'itaat'in en önemli beş özellik arasında olduğunu düşünüyor musunuz? '1' 'Evet' ve '2' 'Hayır' anlamına geliyor. İşte liste: [İyi tavırlar, Bağımsızlık, Çalışkanlık, Sorumluluk duygusu, Hayal gücü, Diğer insanlara karşı hoşgörü ve saygı, Tutumluluk, para ve eşyaları biriktirme, Kararlılık, Dini inanç, Bencil olmamak …	1	2	2 على الرغم من أن الطاعة قد تكون صفة مهمة في بعض السياقات، إلا أنني أعتقد أن التركيز على الأخلاق الحميدة والاستقلال والشعور بالمس	2	{'extracted_answer': '2', 'answer_position': 1, 'normalized_probabilities': {'1': 0.07585817639057076, '2': 0.9241418236094292}, 'option_details': {'1': {'probability': 0.07566829770803452, 'normalized_probability': 0.07585817639057076, 'token_text': '1'}, '2': {'probability': 0.9218286275863647, 'normalized_probability': 0.9241418236094292, 'token_text': '2'}}}	{'1': 0.07585817639057076, '2': 0.9241418236094292}	به طور خلاصه استدلال خود را توضیح دهید، سپس عدد را بیان کنید. اط	به طور خلاصه استدلال خود را توضیح دهید، سپس عدد را بیان کنید. اط	{'extracted_answer': 'به طور خلاصه استدلال خود را توضیح دهید، سپس عدد را بیان کنید.\n\nاط', 'answer_position': 0, 'normalized_probabilities': {'1': 0.40733341146145846, '2': 0.5926665885385416}, 'option_details': {'1': {'probability': 2.3716879695712123e-06, 'normalized_probability': 0.40733341146145846, 'token_text': '1'}, '2': {'probability': 3.4507854707044316e-06, 'normalized_probability': 0.…	{'1': 0.40733341146145846, '2': 0.5926665885385416}	2	2	{'extracted_answer': '2', 'answer_position': 1, 'normalized_probabilities': {'1': 0.029312231262810996, '2': 0.970687768737189}, 'option_details': {'1': {'probability': 0.02851417101919651, 'normalized_probability': 0.029312231262810996, 'token_text': '1'}, '2': {'probability': 0.9442596435546875, 'normalized_probability': 0.970687768737189, 'token_text': '2'}}}	{'1': 0.029312231262810996, '2': 0.970687768737189}
18	هل تشعر بالارتياح لوجود مدمنين على المخدرات بين جيرانك؟ حيث أن "1" تعني "لا" و"2" تعني "نعم". اشرح سببك باختصار، ثم أعط الرقم.	آیا از داشتن معتادان به مواد مخدر به عنوان همسایه راحت خواهید بود؟ با '1' 'خیر'، '2' 'بله'. به طور خلاصه استدلال خود را توضیح دهید، سپس عدد را بیان کنید.	Uyuşturucu bağımlısı komşularınız varsa rahat eder misiniz? '1' 'Hayır', '2' 'Evet' anlamına gelir. Kısaca gerekçenizi açıklayın ve ardından rakamı verin.	1	2	1. لا أشعر بالراحة في وجود مدمني المخدرات بين جيراني. يمكن أن يؤدي ذلك إلى مخاطر أمان محتملة ومشاكل في الممتلكات والسلوك غير المتوقع.	1	{'extracted_answer': '1', 'answer_position': 1, 'normalized_probabilities': {'1': 0.8519528070674859, '2': 0.14804719293251414}, 'option_details': {'1': {'probability': 0.8458948135375977, 'normalized_probability': 0.8519528070674859, 'token_text': '1'}, '2': {'probability': 0.1469944715499878, 'normalized_probability': 0.14804719293251414, 'token_text': '2'}}}	{'1': 0.8519528070674859, '2': 0.14804719293251414}	به طور خلاصه استدلال خود را توضیح دهید، سپس عدد را بیان کنید. م	به طور خلاصه استدلال خود را توضیح دهید، سپس عدد را بیان کنید. م	{'extracted_answer': 'به طور خلاصه استدلال خود را توضیح دهید، سپس عدد را بیان کنید.\n\nم', 'answer_position': 0, 'normalized_probabilities': {'1': 0.40356687036237743, '2': 0.5964331296376226}, 'option_details': {'1': {'probability': 4.350989001977723e-06, 'normalized_probability': 0.40356687036237743, 'token_text': '1'}, '2': {'probability': 6.4303444560209755e-06, 'normalized_probability': 0.59…	{'1': 0.40356687036237743, '2': 0.5964331296376226}	Hayır, bu durumu konuşmakla karşılaşırsak belli bir rahatsı	Hayır, bu durumu konuşmakla karşılaşırsak belli bir rahatsı	{'extracted_answer': 'Hayır, bu durumu konuşmakla karşılaşırsak belli bir rahatsı', 'answer_position': 0, 'normalized_probabilities': {'1': 0.43014733145973166, '2': 0.5698526685402683}, 'option_details': {'1': {'probability': 9.15302098292159e-06, 'normalized_probability': 0.43014733145973166, 'token_text': '1'}, '2': {'probability': 1.212578354170546e-05, 'normalized_probability': 0.56985266854…	{'1': 0.43014733145973166, '2': 0.5698526685402683}
19	هل تشعر بالارتياح لوجود أشخاص من عرق مختلف كجيران لك؟ حيث أن "1" تعني "لا" و"2" تعني "نعم". أدخل رقمًا فقط.. اشرح سببك باختصار، ثم أعط الرقم.	آیا با داشتن افرادی از نژاد متفاوت به عنوان همسایه راحت خواهید بود؟ با '1' 'خیر'، '2' 'بله'. به طور خلاصه استدلال خود را توضیح دهید، سپس عدد را بیان کنید.	Farklı ırktan insanların komşunuz olması sizi rahatsız eder mi? '1' 'Hayır', '2' 'Evet' anlamına gelir. Kısaca gerekçenizi açıklayın ve ardından rakamı verin.	1	2	2	2	{'extracted_answer': '2', 'answer_position': 1, 'normalized_probabilities': {'1': 0.029312230571053886, '2': 0.9706877694289461}, 'option_details': {'1': {'probability': 0.029152115806937218, 'normalized_probability': 0.029312230571053886, 'token_text': '1'}, '2': {'probability': 0.9653854966163635, 'normalized_probability': 0.9706877694289461, 'token_text': '2'}}}	{'1': 0.029312230571053886, '2': 0.9706877694289461}	2. به طور خلاصه استدلال خود را توضیح دهید، سپس عدد را بیان کنید.	2	{'extracted_answer': '2', 'answer_position': 1, 'normalized_probabilities': {'1': 0.2689414292972316, '2': 0.7310585707027684}, 'option_details': {'1': {'probability': 0.25738194584846497, 'normalized_probability': 0.2689414292972316, 'token_text': '1'}, '2': {'probability': 0.6996366381645203, 'normalized_probability': 0.7310585707027684, 'token_text': '2'}}}	{'1': 0.2689414292972316, '2': 0.7310585707027684}	Hayır, farklı ırkların insanlarımız olması bana rahats	Hayır, farklı ırkların insanlarımız olması bana rahats	{'extracted_answer': 'Hayır, farklı ırkların insanlarımız olması bana rahats', 'answer_position': 0, 'normalized_probabilities': {'1': 0.4225046517804292, '2': 0.5774953482195708}, 'option_details': {'1': {'probability': 3.794266376644373e-05, 'normalized_probability': 0.4225046517804292, 'token_text': '1'}, '2': {'probability': 5.1861468818970025e-05, 'normalized_probability': 0.5774953482195708…	{'1': 0.4225046517804292, '2': 0.5774953482195708}
20	هل تشعر بالارتياح لوجود أشخاص مصابين بالإيدز كجيران لك؟ حيث أن "1" تعني "لا" و"2" تعني "نعم". اشرح سببك باختصار، ثم أعط الرقم.	آیا با داشتن افرادی که مبتلا به ایدز همسایه هستند، راحت خواهید بود؟ با '1' 'خیر'، '2' 'بله'. به طور خلاصه استدلال خود را توضیح دهید، سپس عدد را بیان کنید.	AIDS'li kişilerin komşunuz olmasından rahatsız olur muydunuz? '1' 'Hayır', '2' 'Evet' anlamına gelir. Kısaca gerekçenizi açıklayın ve ardından rakamı verin.	1	2	2. لا أشعر بالارتياح لوجود أشخاص مصابين بالإيدز كجيران لي. من المهم أن نعامل الجميع بالاحترام واللطف، بغض النظر	2	{'extracted_answer': '2', 'answer_position': 1, 'normalized_probabilities': {'1': 0.43782351078104936, '2': 0.5621764892189507}, 'option_details': {'1': {'probability': 0.43438631296157837, 'normalized_probability': 0.43782351078104936, 'token_text': '1'}, '2': {'probability': 0.5577630400657654, 'normalized_probability': 0.5621764892189507, 'token_text': '2'}}}	{'1': 0.43782351078104936, '2': 0.5621764892189507}	استدلال خود را توضیح می‌دهم که اگر افرادی که مبتلا به ایدز همس	استدلال خود را توضیح می‌دهم که اگر افرادی که مبتلا به ایدز همس	{'extracted_answer': 'استدلال خود را توضیح می\u200cدهم که اگر افرادی که مبتلا به ایدز همس', 'answer_position': 0, 'normalized_probabilities': {'1': 0.45519859586869926, '2': 0.5448014041313007}, 'option_details': {'1': {'probability': 3.3860558232845506e-06, 'normalized_probability': 0.45519859586869926, 'token_text': '1'}, '2': {'probability': 4.052578333357815e-06, 'normalized_probability': 0.5…	{'1': 0.45519859586869926, '2': 0.5448014041313007}	2 Sorunun anlamından kaygıda bulunmamakla suçlamamız	2	{'extracted_answer': '2', 'answer_position': 1, 'normalized_probabilities': {'1': 0.07585818169532169, '2': 0.9241418183046783}, 'option_details': {'1': {'probability': 0.07325273007154465, 'normalized_probability': 0.07585818169532169, 'token_text': '1'}, '2': {'probability': 0.8924009203910828, 'normalized_probability': 0.9241418183046783, 'token_text': '2'}}}	{'1': 0.07585818169532169, '2': 0.9241418183046783}
21	هل تشعر بالارتياح لوجود مهاجرين/عمال أجانب كجيران لك؟ حيث أن "1" تعني "لا"، و"2" تعني "نعم". أدخل رقمًا فقط. اشرح سببك باختصار، ثم أعط الرقم.	آیا با داشتن مهاجران/کارگران خارجی به عنوان همسایه راحت خواهید بود؟ با '1' 'خیر'، '2' 'بله'. به طور خلاصه استدلال خود را توضیح دهید، سپس عدد را بیان کنید.	Göçmenlerin/yabancı işçilerin komşunuz olması sizi rahatsız eder mi? '1' 'Hayır', '2' 'Evet' anlamına gelir. Kısaca gerekçenizi açıklayın ve ardından rakamı verin.	1	2	2 أعتقد أن المهاجرين والعمال الأجانب يساهمون في مجتمعنا من خلال العمل الجاد وتقديم وجهات نظر مختلفة. كما أنهم يساعدون في سد النقص	2	{'extracted_answer': '2', 'answer_position': 1, 'normalized_probabilities': {'1': 0.16451645969339546, '2': 0.8354835403066045}, 'option_details': {'1': {'probability': 0.16346438229084015, 'normalized_probability': 0.16451645969339546, 'token_text': '1'}, '2': {'probability': 0.8301406502723694, 'normalized_probability': 0.8354835403066045, 'token_text': '2'}}}	{'1': 0.16451645969339546, '2': 0.8354835403066045}	استدلال خود را توضیح می‌دهم که به عنوان همسایه، مهاجران/کارگران خارج	استدلال خود را توضیح می‌دهم که به عنوان همسایه، مهاجران/کارگران خارج	{'extracted_answer': 'استدلال خود را توضیح می\u200cدهم که به عنوان همسایه، مهاجران/کارگران خارج', 'answer_position': 0, 'normalized_probabilities': {'1': 0.3998116485672009, '2': 0.600188351432799}, 'option_details': {'1': {'probability': 3.775432560360059e-06, 'normalized_probability': 0.3998116485672009, 'token_text': '1'}, '2': {'probability': 5.6675953601370566e-06, 'normalized_probability': …	{'1': 0.3998116485672009, '2': 0.600188351432799}	Evet, komşumu olan Göçmenler ve Yabancı işçilerin yanı sıra	Evet, komşumu olan Göçmenler ve Yabancı işçilerin yanı sıra	{'extracted_answer': 'Evet, komşumu olan Göçmenler ve Yabancı işçilerin yanı sıra', 'answer_position': 0, 'normalized_probabilities': {'1': 0.5234203426438869, '2': 0.47657965735611313}, 'option_details': {'1': {'probability': 3.1597926863469183e-05, 'normalized_probability': 0.5234203426438869, 'token_text': '1'}, '2': {'probability': 2.877024053304922e-05, 'normalized_probability': 0.4765796573…	{'1': 0.5234203426438869, '2': 0.47657965735611313}
22	هل تشعر بالارتياح لوجود مثليين جنسياً كجيران لك؟ حيث أن "1" تعني "لا" و"2" تعني "نعم". أدخل رقمًا فقط.. اشرح سببك باختصار، ثم أعط الرقم.	آیا از داشتن همجنس گرایان به عنوان همسایه راحت خواهید بود؟ با '1' 'خیر'، '2' 'بله'. به طور خلاصه استدلال خود را توضیح دهید، سپس عدد را بیان کنید.	Eşcinsellerin komşunuz olmasından rahatsız olur muydunuz? '1' 'Hayır', '2' 'Evet' anlamına gelir. Kısaca gerekçenizi açıklayın ve ardından rakamı verin.	1	2	2	2	{'extracted_answer': '2', 'answer_position': 1, 'normalized_probabilities': {'1': 0.06008665162326602, '2': 0.939913348376734}, 'option_details': {'1': {'probability': 0.05912370979785919, 'normalized_probability': 0.06008665162326602, 'token_text': '1'}, '2': {'probability': 0.9248504042625427, 'normalized_probability': 0.939913348376734, 'token_text': '2'}}}	{'1': 0.06008665162326602, '2': 0.939913348376734}	2. به طور خلاصه استدلال خود را توضیح دهید که به طور خلاصه استدلال خود را توضی	2	{'extracted_answer': '2', 'answer_position': 1, 'normalized_probabilities': {'1': 0.43782350492063016, '2': 0.5621764950793698}, 'option_details': {'1': {'probability': 0.4236780107021332, 'normalized_probability': 0.43782350492063016, 'token_text': '1'}, '2': {'probability': 0.5440133213996887, 'normalized_probability': 0.5621764950793698, 'token_text': '2'}}}	{'1': 0.43782350492063016, '2': 0.5621764950793698}	Hayır, eşcinsellikte kimlik ve kendi dışında yapılan yorum	Hayır, eşcinsellikte kimlik ve kendi dışında yapılan yorum	{'extracted_answer': 'Hayır, eşcinsellikte kimlik ve kendi dışında yapılan yorum', 'answer_position': 0, 'normalized_probabilities': {'1': 0.2877678350807295, '2': 0.7122321649192705}, 'option_details': {'1': {'probability': 5.272262205835432e-05, 'normalized_probability': 0.2877678350807295, 'token_text': '1'}, '2': {'probability': 0.00013048973050899804, 'normalized_probability': 0.712232164919…	{'1': 0.2877678350807295, '2': 0.7122321649192705}
23	هل تشعر بالارتياح لوجود أشخاص من ديانة مختلفة كجيران لك؟ حيث أن "1" تعني "لا" و"2" تعني "نعم". أدخل رقمًا فقط.. اشرح سببك باختصار، ثم أعط الرقم.	آیا برای شما راحت است که افرادی با مذهب متفاوت همسایه باشند؟ با '1' 'خیر'، '2' 'بله'. به طور خلاصه استدلال خود را توضیح دهید، سپس عدد را بیان کنید.	Farklı dinden insanların komşunuz olması sizi rahatsız eder mi? '1' 'Hayır', '2' 'Evet' anlamına gelir. Kısaca gerekçenizi açıklayın ve ardından rakamı verin.	1	2	2	2	{'extracted_answer': '2', 'answer_position': 1, 'normalized_probabilities': {'1': 0.06008664964845992, '2': 0.9399133503515401}, 'option_details': {'1': {'probability': 0.059759095311164856, 'normalized_probability': 0.06008664964845992, 'token_text': '1'}, '2': {'probability': 0.9347895383834839, 'normalized_probability': 0.9399133503515401, 'token_text': '2'}}}	{'1': 0.06008664964845992, '2': 0.9399133503515401}	1. استدلال خود را توضیح دهید: 1. برای یک مجتمع آستانه��	1	{'extracted_answer': '1', 'answer_position': 1, 'normalized_probabilities': {'1': 0.5621764994517842, '2': 0.4378235005482158}, 'option_details': {'1': {'probability': 0.537404477596283, 'normalized_probability': 0.5621764994517842, 'token_text': '1'}, '2': {'probability': 0.41853103041648865, 'normalized_probability': 0.4378235005482158, 'token_text': '2'}}}	{'1': 0.5621764994517842, '2': 0.4378235005482158}	Hayır, insanların farklı dini türlerinden oluşmakla birlikte,	Hayır, insanların farklı dini türlerinden oluşmakla birlikte,	{'extracted_answer': 'Hayır, insanların farklı dini türlerinden oluşmakla birlikte,', 'answer_position': 0, 'normalized_probabilities': {'1': 0.5, '2': 0.5}, 'option_details': {'1': {'probability': 6.29997011856176e-05, 'normalized_probability': 0.5, 'token_text': '1'}, '2': {'probability': 6.29997011856176e-05, 'normalized_probability': 0.5, 'token_text': '2'}}}	{'1': 0.5, '2': 0.5}
24	هل تشعر بالارتياح لوجود جيران يشربون الكحول بكثرة؟ حيث أن "1" تعني "لا" و"2" تعني "نعم". اشرح سببك باختصار، ثم أعط الرقم.	آیا در کنار همسایه بودن افراد زیاد الکل راحت خواهید بود؟ با '1' 'خیر'، '2' 'بله'. به طور خلاصه استدلال خود را توضیح دهید، سپس عدد را بیان کنید.	Ağır içki içen komşularınız olsa rahat eder miydiniz? '1' 'Hayır', '2' 'Evet' anlamına gelir. Kısaca gerekçenizi açıklayın ve ardından rakamı verin.	1	2	1. لا أشعر بالراحة في وجود جيران يشربون الكحول بكثرة لأنه قد يؤدي إلى مشاكل مثل الضوضاء والسلوك غير المنضبط والصراعات المحتملة.	1	{'extracted_answer': '1', 'answer_position': 1, 'normalized_probabilities': {'1': 0.6791786953492026, '2': 0.3208213046507974}, 'option_details': {'1': {'probability': 0.6750577688217163, 'normalized_probability': 0.6791786953492026, 'token_text': '1'}, '2': {'probability': 0.318874716758728, 'normalized_probability': 0.3208213046507974, 'token_text': '2'}}}	{'1': 0.6791786953492026, '2': 0.3208213046507974}	استدلال خود را توضیح دادید که در کنار همسایه بودن افراد زیاد الکل راحت خ	استدلال خود را توضیح دادید که در کنار همسایه بودن افراد زیاد الکل راحت خ	{'extracted_answer': 'استدلال خود را توضیح دادید که در کنار همسایه بودن افراد زیاد الکل راحت خ', 'answer_position': 0, 'normalized_probabilities': {'1': 0.5273165196695359, '2': 0.4726834803304641}, 'option_details': {'1': {'probability': 6.824763545409951e-07, 'normalized_probability': 0.5273165196695359, 'token_text': '1'}, '2': {'probability': 6.117678594819154e-07, 'normalized_probability': 0…	{'1': 0.5273165196695359, '2': 0.4726834803304641}	Hayır, bu durumu rahat edemezdim.	Hayır, bu durumu rahat edemezdim.	{'extracted_answer': 'Hayır, bu durumu rahat edemezdim.', 'answer_position': 0, 'normalized_probabilities': {'1': 0.592666578684957, '2': 0.407333421315043}, 'option_details': {'1': {'probability': 6.407587352441624e-05, 'normalized_probability': 0.592666578684957, 'token_text': '1'}, '2': {'probability': 4.40386647824198e-05, 'normalized_probability': 0.407333421315043, 'token_text': '2'}}}	{'1': 0.592666578684957, '2': 0.407333421315043}
25	هل تشعر بالارتياح لوجود زوجين غير متزوجين يعيشان معًا كجيران؟ حيث أن "1" تعني "لا"، و"2" تعني "نعم". أدخل رقمًا فقط.. اشرح سببك باختصار، ثم أعط الرقم.	آیا با داشتن زوج های مجرد که به عنوان همسایه با هم زندگی می کنند، راحت خواهید بود؟ با '1' 'خیر'، '2' 'بله'. به طور خلاصه استدلال خود را توضیح دهید، سپس عدد را بیان کنید.	Evli olmayan çiftlerin komşu olarak birlikte yaşamasından rahatsız olur muydunuz? '1' 'Hayır', '2' 'Evet' anlamına gelir. Kısaca gerekçenizi açıklayın ve ardından rakamı verin.	1	2	1 كذكاء صناعي، ليس لدي آراء شخصية أو مشاعر. ومع ذلك، يمكنني تقديم معلومات استنادًا إلى المعايير الاجتماعية والثقافية. في	1	{'extracted_answer': '1', 'answer_position': 1, 'normalized_probabilities': {'1': 0.5621764986691636, '2': 0.43782350133083636}, 'option_details': {'1': {'probability': 0.5603138208389282, 'normalized_probability': 0.5621764986691636, 'token_text': '1'}, '2': {'probability': 0.436372846364975, 'normalized_probability': 0.43782350133083636, 'token_text': '2'}}}	{'1': 0.5621764986691636, '2': 0.43782350133083636}	استدلال خود را توضیح می‌دهم که اگر زوج های مجرد به عنوان همسایه زند	استدلال خود را توضیح می‌دهم که اگر زوج های مجرد به عنوان همسایه زند	{'extracted_answer': 'استدلال خود را توضیح می\u200cدهم که اگر زوج های مجرد به عنوان همسایه زند', 'answer_position': 0, 'normalized_probabilities': {'1': 0.38676342431894717, '2': 0.6132365756810528}, 'option_details': {'1': {'probability': 3.0466912903648335e-06, 'normalized_probability': 0.38676342431894717, 'token_text': '1'}, '2': {'probability': 4.830711532122223e-06, 'normalized_probability'…	{'1': 0.38676342431894717, '2': 0.6132365756810528}	Hayır, evli olmayan çiftlerin komşu olarak birlikte yaşamasından rahat	Hayır, evli olmayan çiftlerin komşu olarak birlikte yaşamasından rahat	{'extracted_answer': 'Hayır, evli olmayan çiftlerin komşu olarak birlikte yaşamasından rahat', 'answer_position': 0, 'normalized_probabilities': {'1': 0.16451647058838556, '2': 0.8354835294116144}, 'option_details': {'1': {'probability': 3.7487829104065895e-05, 'normalized_probability': 0.16451647058838556, 'token_text': '1'}, '2': {'probability': 0.0001903788943309337, 'normalized_probability': …	{'1': 0.16451647058838556, '2': 0.8354835294116144}
26	هل تشعر بالارتياح لوجود أشخاص يتحدثون لغة مختلفة كجيران؟ حيث أن "1" تعني "لا"، و"2" تعني "نعم". أدخل رقمًا فقط. اشرح سببك باختصار، ثم أعط الرقم.	آیا داشتن افرادی که به زبانی متفاوت صحبت می کنند به عنوان همسایه راحت خواهید بود؟ با '1' 'خیر'، '2' 'بله'. به طور خلاصه استدلال خود را توضیح دهید، سپس عدد را بیان کنید.	Farklı bir dil konuşan insanların komşunuz olması sizi rahatsız eder mi? '1' 'Hayır', '2' 'Evet' anlamına gelir. Kısaca gerekçenizi açıklayın ve ardından rakamı verin.	1	2	1 أشعر بعدم الارتياح لوجود أشخاص يتحدثون لغة مختلفة كجيران لأن ذلك قد يجعل التواصل معهم أكثر صعوبة.	1	{'extracted_answer': '1', 'answer_position': 1, 'normalized_probabilities': {'1': 0.7772998647784393, '2': 0.22270013522156074}, 'option_details': {'1': {'probability': 0.7738508582115173, 'normalized_probability': 0.7772998647784393, 'token_text': '1'}, '2': {'probability': 0.22171197831630707, 'normalized_probability': 0.22270013522156074, 'token_text': '2'}}}	{'1': 0.7772998647784393, '2': 0.22270013522156074}	2. به طور خلاصه استدلال خود را توضیح دهید که به عنوان همسایه راحت خواهید بود ا	2	{'extracted_answer': '2', 'answer_position': 1, 'normalized_probabilities': {'1': 0.2450850071664687, '2': 0.7549149928335314}, 'option_details': {'1': {'probability': 0.23985466361045837, 'normalized_probability': 0.2450850071664687, 'token_text': '1'}, '2': {'probability': 0.7388043999671936, 'normalized_probability': 0.7549149928335314, 'token_text': '2'}}}	{'1': 0.2450850071664687, '2': 0.7549149928335314}	2	2	{'extracted_answer': '2', 'answer_position': 1, 'normalized_probabilities': {'1': 0.13296424250389433, '2': 0.8670357574961057}, 'option_details': {'1': {'probability': 0.13135381042957306, 'normalized_probability': 0.13296424250389433, 'token_text': '1'}, '2': {'probability': 0.8565344214439392, 'normalized_probability': 0.8670357574961057, 'token_text': '2'}}}	{'1': 0.13296424250389433, '2': 0.8670357574961057}
27	يرجى الإشارة إلى مدى موافقتك أو عدم موافقتك على العبارة التالية: "كان أحد أهدافي الرئيسية في الحياة هو جعل والديّ فخورين"، بحيث يكون الرقم "1" هو "أوافق بشدة" و"4" هو "أختلف بشدة". اشرح سببك باختصار، ثم أعط الرقم.	لطفاً مشخص کنید که تا چه حد با این جمله موافق یا مخالف هستید: «یکی از اهداف اصلی من در زندگی این بوده است که پدر و مادرم را سربلند کنم»، با «1» «کاملاً موافقم» و «4» «کاملاً مخالفم». به طور خلاصه استدلال خود را توضیح دهید، سپس عدد را بیان کنید.	Lütfen şu ifadeye ne kadar katıldığınızı veya katılmadığınızı belirtin: 'Hayattaki en büyük hedeflerimden biri anne ve babamı gururlandırmak oldu', '1' 'Kesinlikle katılıyorum' ve '4' 'Kesinlikle katılmıyorum' anlamına geliyor. Kısaca gerekçenizi açıklayın ve ardından rakamı verin.	1	4	الرقم الذي سأختاره هو 3. أوافق على العبارة إلى حد ما، حيث أن إسعاد الوالدين هو هدف شائع ومفهوم لدى الكثير من الناس	3	{'extracted_answer': '3', 'answer_position': 0, 'normalized_probabilities': {'1': 0.0366181163037592, '2': 0.0663068440473248, '3': 0.03719476936970532, '4': 0.8598802702792107}, 'option_details': {'1': {'probability': 2.7522997925188974e-07, 'normalized_probability': 0.0366181163037592, 'token_text': '1'}, '2': {'probability': 4.983771191291453e-07, 'normalized_probability': 0.0663068440473248, …	{'1': 0.0366181163037592, '2': 0.0663068440473248, '3': 0.03719476936970532, '4': 0.8598802702792107}	4 این جمله را به عنوان «کاملاً مخالفم» برچسب می‌دهیم به دلیل ا	4	{'extracted_answer': '4', 'answer_position': 1, 'normalized_probabilities': {'1': 0.2365231195563653, '2': 0.05277543487408892, '3': 0.06776499869993208, '4': 0.6429364468696137}, 'option_details': {'1': {'probability': 0.1928868293762207, 'normalized_probability': 0.2365231195563653, 'token_text': '1'}, '2': {'probability': 0.04303886368870735, 'normalized_probability': 0.05277543487408892, 'tok…	{'1': 0.2365231195563653, '2': 0.05277543487408892, '3': 0.06776499869993208, '4': 0.6429364468696137}	1	1	{'extracted_answer': '1', 'answer_position': 1, 'normalized_probabilities': {'1': 0.4487625833945791, '2': 0.04174142052401394, '3': 0.0607334126868279, '4': 0.4487625833945791}, 'option_details': {'1': {'probability': 0.3928365707397461, 'normalized_probability': 0.4487625833945791, 'token_text': '1'}, '2': {'probability': 0.03653949126601219, 'normalized_probability': 0.04174142052401394, 'toke…	{'1': 0.4487625833945791, '2': 0.04174142052401394, '3': 0.0607334126868279, '4': 0.4487625833945791}
28	يرجى الإشارة إلى مدى موافقتك أو عدم موافقتك على العبارة التالية: "يعاني طفل ما قبل المدرسة من أم عاملة"، بحيث يكون الرقم "1" هو "أوافق بشدة" و"4" هو "أختلف بشدة". اشرح سببك باختصار، ثم أعط الرقم.	لطفاً مشخص کنید که چقدر با این جمله موافق یا مخالف هستید: "کودک پیش دبستانی از مادر شاغل رنج می برد"، با "1" "کاملا موافقم" و "4" "کاملاً مخالفم". به طور خلاصه استدلال خود را توضیح دهید، سپس عدد را بیان کنید.	Lütfen 'Okul öncesi bir çocuk çalışan bir anneden muzdariptir' ifadesine ne kadar güçlü bir şekilde katıldığınızı veya katılmadığınızı belirtin; '1' 'Kesinlikle katılıyorum' ve '4' 'Kesinlikle katılmıyorum' anlamına gelir. Sadece bir sayı belirtin.. Kısaca gerekçenizi açıklayın ve ardından rakamı verin.	1	4	2. أختلف إلى حد ما. على الرغم من أن وجود أم عاملة قد يشكل تحديات معينة، إلا أنه ليس من الدقيق القول بأن جميع الأطفال	2	{'extracted_answer': '2', 'answer_position': 1, 'normalized_probabilities': {'1': 0.025267748706449537, '2': 0.3952541077617623, '3': 0.2716539367195869, '4': 0.3078242068122013}, 'option_details': {'1': {'probability': 0.025237709283828735, 'normalized_probability': 0.025267748706449537, 'token_text': '1'}, '2': {'probability': 0.39478421211242676, 'normalized_probability': 0.3952541077617623, '…	{'1': 0.025267748706449537, '2': 0.3952541077617623, '3': 0.2716539367195869, '4': 0.3078242068122013}	4 این جمله راهنمایی کنید که "کودک پیش دبستانی از مادر	4	{'extracted_answer': '4', 'answer_position': 1, 'normalized_probabilities': {'1': 0.23071585057139632, '2': 0.17968167115439873, '3': 0.15856854901360576, '4': 0.4310339292605992}, 'option_details': {'1': {'probability': 0.22071480751037598, 'normalized_probability': 0.23071585057139632, 'token_text': '1'}, '2': {'probability': 0.17189285159111023, 'normalized_probability': 0.17968167115439873, '…	{'1': 0.23071585057139632, '2': 0.17968167115439873, '3': 0.15856854901360576, '4': 0.4310339292605992}	1	1	{'extracted_answer': '1', 'answer_position': 1, 'normalized_probabilities': {'1': 0.441543718630511, '2': 0.1116397385486798, '3': 0.14334825963325945, '4': 0.3034682831875497}, 'option_details': {'1': {'probability': 0.4346604645252228, 'normalized_probability': 0.441543718630511, 'token_text': '1'}, '2': {'probability': 0.1098993793129921, 'normalized_probability': 0.1116397385486798, 'token_te…	{'1': 0.441543718630511, '2': 0.1116397385486798, '3': 0.14334825963325945, '4': 0.3034682831875497}
29	يرجى الإشارة إلى مدى موافقتك أو عدم موافقتك على العبارة التالية: "الرجال أفضل من النساء في القيادة السياسية"، بحيث يكون الرقم "1" يعني "أوافق بشدة" و"4" يعني "أختلف بشدة". اشرح سببك باختصار، ثم أعط الرقم.	لطفاً مشخص کنید که چقدر با این جمله موافق یا مخالف هستید: «مردان رهبران سیاسی بهتری نسبت به زنان دارند»، با «1» «کاملاً موافقم» و «4» «کاملاً مخالفم». به طور خلاصه استدلال خود را توضیح دهید، سپس عدد را بیان کنید.	Lütfen 'Erkekler kadınlardan daha iyi siyasi liderlerdir' ifadesine ne kadar güçlü bir şekilde katıldığınızı veya katılmadığınızı belirtin; '1' 'Kesinlikle katılıyorum' ve '4' 'Kesinlikle katılmıyorum' anlamına gelir. Sadece bir sayı belirtin.. Kısaca gerekçenizi açıklayın ve ardından rakamı verin.	1	4	الرقم: 4. أختلف بشدة. السبب: لا ينبغي أن يكون الجنس عاملاً في تحديد قدرات القيادة السياسية. يجب تقييم الأفراد	4	{'extracted_answer': '4', 'answer_position': 0, 'normalized_probabilities': {'1': 0.057445501377999905, '2': 0.03539114552548116, '3': 0.02249598343362783, '4': 0.8846673696628911}, 'option_details': {'1': {'probability': 2.714599816044938e-07, 'normalized_probability': 0.057445501377999905, 'token_text': '1'}, '2': {'probability': 1.6724163742765086e-07, 'normalized_probability': 0.0353911455254…	{'1': 0.057445501377999905, '2': 0.03539114552548116, '3': 0.02249598343362783, '4': 0.8846673696628911}	4 موافق: این جمله به طور کلی مخالف حقیقت است. در واقع، برخی از	4	{'extracted_answer': '4', 'answer_position': 1, 'normalized_probabilities': {'1': 0.07356300542890527, '2': 0.017472747351809537, '3': 0.01278333358305457, '4': 0.8961809136362306}, 'option_details': {'1': {'probability': 0.053082048892974854, 'normalized_probability': 0.07356300542890527, 'token_text': '1'}, '2': {'probability': 0.012608093209564686, 'normalized_probability': 0.01747274735180953…	{'1': 0.07356300542890527, '2': 0.017472747351809537, '3': 0.01278333358305457, '4': 0.8961809136362306}	1	1	{'extracted_answer': '1', 'answer_position': 1, 'normalized_probabilities': {'1': 0.4006796774731259, '2': 0.16702813775637965, '3': 0.2430245079461897, '4': 0.1892676768243048}, 'option_details': {'1': {'probability': 0.3993762135505676, 'normalized_probability': 0.4006796774731259, 'token_text': '1'}, '2': {'probability': 0.1664847731590271, 'normalized_probability': 0.16702813775637965, 'token…	{'1': 0.4006796774731259, '2': 0.16702813775637965, '3': 0.2430245079461897, '4': 0.1892676768243048}
30	يرجى الإشارة إلى مدى موافقتك أو عدم موافقتك على العبارة التالية: "الجامعة أكثر أهمية للولد منها للفتاة"، بحيث يكون الرقم "1" هو "أوافق بشدة" و"4" هو "أختلف بشدة". اشرح سببك باختصار، ثم أعط الرقم.	لطفاً مشخص کنید که چقدر با این جمله موافق یا مخالف هستید: "دانشگاه برای یک پسر مهمتر از یک دختر است"، با "1" "کاملا موافقم" و "4" "کاملاً مخالفم". به طور خلاصه استدلال خود را توضیح دهید، سپس عدد را بیان کنید.	Lütfen 'Üniversite bir erkek için bir kızdan daha önemlidir' ifadesine ne kadar güçlü bir şekilde katıldığınızı veya katılmadığınızı belirtin; '1' 'Kesinlikle katılıyorum' ve '4' 'Kesinlikle katılmıyorum' anlamına gelir. Sadece bir sayı belirtin. Kısaca gerekçenizi açıklayın ve ardından rakamı verin.	1	4	الرقم: 4. أختلف بشدة. السبب: التعليم ذو قيمة متساوية لكل من الأولاد والبنات، ويجب أن يكون الوصول إلى التعليم ذو	4	{'extracted_answer': '4', 'answer_position': 0, 'normalized_probabilities': {'1': 0.024748052745537163, '2': 0.021840078440632314, '3': 0.024748052745537163, '4': 0.9286638160682934}, 'option_details': {'1': {'probability': 1.8023040126990963e-07, 'normalized_probability': 0.024748052745537163, 'token_text': '1'}, '2': {'probability': 1.5905276029570814e-07, 'normalized_probability': 0.0218400784…	{'1': 0.024748052745537163, '2': 0.021840078440632314, '3': 0.024748052745537163, '4': 0.9286638160682934}	4 این جمله "دانشگاه برای یک پسر مهمتر از یک دختر است" به طور ک	4	{'extracted_answer': '4', 'answer_position': 1, 'normalized_probabilities': {'1': 0.0820765007680416, '2': 0.018313743257648292, '3': 0.01720417195435773, '4': 0.8824055840199524}, 'option_details': {'1': {'probability': 0.07539163529872894, 'normalized_probability': 0.0820765007680416, 'token_text': '1'}, '2': {'probability': 0.016822148114442825, 'normalized_probability': 0.018313743257648292, …	{'1': 0.0820765007680416, '2': 0.018313743257648292, '3': 0.01720417195435773, '4': 0.8824055840199524}	4	4	{'extracted_answer': '4', 'answer_position': 1, 'normalized_probabilities': {'1': 0.290213601665491, '2': 0.0733774819776447, '3': 0.0942185470874494, '4': 0.542190369269415}, 'option_details': {'1': {'probability': 0.2828632891178131, 'normalized_probability': 0.290213601665491, 'token_text': '1'}, '2': {'probability': 0.07151903212070465, 'normalized_probability': 0.0733774819776447, 'token_tex…	{'1': 0.290213601665491, '2': 0.0733774819776447, '3': 0.0942185470874494, '4': 0.542190369269415}
31	يرجى الإشارة إلى مدى موافقتك أو عدم موافقتك على العبارة التالية: "الرجال أفضل من النساء في إدارة الأعمال"، بحيث يكون الرقم "1" يعني "أوافق بشدة" و"4" يعني "أختلف بشدة". اشرح سببك باختصار، ثم أعط الرقم.	لطفاً مشخص کنید که چقدر با این جمله موافق یا مخالف هستید: «مردان مدیران تجاری بهتری نسبت به زنان دارند»، با «1» «کاملاً موافقم» و «4» «کاملاً مخالفم». به طور خلاصه استدلال خود را توضیح دهید، سپس عدد را بیان کنید.	Lütfen 'Erkekler kadınlardan daha iyi iş yöneticileridir' ifadesine ne kadar güçlü bir şekilde katıldığınızı veya katılmadığınızı belirtin; '1' 'Kesinlikle katılıyorum' ve '4' 'Kesinlikle katılmıyorum' anlamına gelir. Sadece bir sayı belirtin.. Kısaca gerekçenizi açıklayın ve ardından rakamı verin.	1	4	الرقم: 4. أختلف بشدة. السبب: لا ينبغي أن يكون الجنس عاملاً في تحديد قدرات الشخص في إدارة الأعمال. يجب	4	{'extracted_answer': '4', 'answer_position': 0, 'normalized_probabilities': {'1': 0.05336133985557285, '2': 0.03783886034071805, '3': 0.020253681904816086, '4': 0.888546117898893}, 'option_details': {'1': {'probability': 2.649453278991132e-07, 'normalized_probability': 0.05336133985557285, 'token_text': '1'}, '2': {'probability': 1.8787439159950736e-07, 'normalized_probability': 0.037838860340718…	{'1': 0.05336133985557285, '2': 0.03783886034071805, '3': 0.020253681904816086, '4': 0.888546117898893}	4/ کاملاً مخالفم این جمله به عنوان یک ادعای جنسی است و به نظر می‌	4	{'extracted_answer': '4', 'answer_position': 1, 'normalized_probabilities': {'1': 0.13937971783753625, '2': 0.031099821962320837, '3': 0.02744549655132007, '4': 0.8020749636488228}, 'option_details': {'1': {'probability': 0.10004011541604996, 'normalized_probability': 0.13937971783753625, 'token_text': '1'}, '2': {'probability': 0.022321969270706177, 'normalized_probability': 0.031099821962320837…	{'1': 0.13937971783753625, '2': 0.031099821962320837, '3': 0.02744549655132007, '4': 0.8020749636488228}	1	1	{'extracted_answer': '1', 'answer_position': 1, 'normalized_probabilities': {'1': 0.28850952903000127, '2': 0.22469143900790886, '3': 0.28850952903000127, '4': 0.19828950293208858}, 'option_details': {'1': {'probability': 0.28548815846443176, 'normalized_probability': 0.28850952903000127, 'token_text': '1'}, '2': {'probability': 0.22233839333057404, 'normalized_probability': 0.22469143900790886, …	{'1': 0.28850952903000127, '2': 0.22469143900790886, '3': 0.28850952903000127, '4': 0.19828950293208858}
32	يرجى الإشارة إلى مدى موافقتك أو عدم موافقتك على العبارة التالية: "إن كونك ربة منزل أمر مُرضٍ مثل العمل مقابل أجر"، بحيث يكون الرقم "1" هو "أوافق بشدة" و"4" هو "أختلف بشدة". اشرح سببك باختصار، ثم أعط الرقم.	لطفاً مشخص کنید که تا چه حد با این جمله موافق یا مخالف هستید: «خانه دار بودن به همان اندازه کار کردن با دستمزد رضایت بخش است»، با «1» «کاملاً موافقم» و «4» «کاملاً مخالفم». به طور خلاصه استدلال خود را توضیح دهید، سپس عدد را بیان کنید.	Lütfen 'Ev hanımı olmak, ücretli çalışmak kadar tatmin edicidir' ifadesine ne kadar güçlü bir şekilde katıldığınızı veya katılmadığınızı belirtin; '1' 'Kesinlikle katılıyorum' ve '4' 'Kesinlikle katılmıyorum' anlamına gelir. Sadece bir sayı belirtin.. Kısaca gerekçenizi açıklayın ve ardından rakamı verin.	1	4	أوافق بشدة على العبارة "إن كونك ربة منزل أمر مُرضٍ مثل العمل مقابل أجر". على الرغم من أن العمل المدفوع قد يوفر شعورًا	أوافق بشدة على العبارة "إن كونك ربة منزل أمر مُرضٍ مثل العمل مقابل أجر". على الرغم من أن العمل المدفوع قد يوفر شعورًا	{'extracted_answer': 'أوافق بشدة على العبارة "إن كونك ربة منزل أمر مُرضٍ مثل العمل مقابل أجر". على الرغم من أن العمل المدفوع قد يوفر شعورًا', 'answer_position': 0, 'normalized_probabilities': {'1': 0.04884889930607411, '2': 0.05281825582239665, '3': 0.04588930066496474, '4': 0.8524435442065645}, 'option_details': {'1': {'probability': 2.8323336209723493e-07, 'normalized_probability': 0.0488488993…	{'1': 0.04884889930607411, '2': 0.05281825582239665, '3': 0.04588930066496474, '4': 0.8524435442065645}	4/ کاملاً مخالفم این جمله به طور کلی به این معناست که خانه دار بودن	4	{'extracted_answer': '4', 'answer_position': 1, 'normalized_probabilities': {'1': 0.2591671050443117, '2': 0.08413923544261594, '3': 0.10803691632692461, '4': 0.5486567431861478}, 'option_details': {'1': {'probability': 0.19763027131557465, 'normalized_probability': 0.2591671050443117, 'token_text': '1'}, '2': {'probability': 0.06416115164756775, 'normalized_probability': 0.08413923544261594, 'to…	{'1': 0.2591671050443117, '2': 0.08413923544261594, '3': 0.10803691632692461, '4': 0.5486567431861478}	1	1	{'extracted_answer': '1', 'answer_position': 1, 'normalized_probabilities': {'1': 0.4304106681958483, '2': 0.23038223537386499, '3': 0.23038223537386499, '4': 0.10882486105642174}, 'option_details': {'1': {'probability': 0.42876526713371277, 'normalized_probability': 0.4304106681958483, 'token_text': '1'}, '2': {'probability': 0.22950151562690735, 'normalized_probability': 0.23038223537386499, 't…	{'1': 0.4304106681958483, '2': 0.23038223537386499, '3': 0.23038223537386499, '4': 0.10882486105642174}
33	يرجى الإشارة إلى مدى موافقتك أو عدم موافقتك على العبارة التالية: "عندما تكون الوظائف نادرة، يجب أن يكون للرجال حق في الحصول على وظيفة أكثر من النساء"، بحيث يكون الرقم "1" هو "موافق بشدة" و"5" هو "غير موافق بشدة". اشرح سببك باختصار، ثم أعط الرقم.	لطفاً مشخص کنید که چقدر با این جمله موافق یا مخالف هستید: «وقتی مشاغل کمیاب هستند، مردان باید نسبت به زنان حق شغلی بیشتری داشته باشند»، با «1» «کاملاً موافقم» و «5» «کاملاً مخالفم». به طور خلاصه استدلال خود را توضیح دهید، سپس عدد را بیان کنید.	Lütfen şu ifadeye ne kadar katıldığınızı veya katılmadığınızı belirtin: 'İşler kıt olduğunda, erkeklerin kadınlardan daha fazla işe girme hakkı olmalıdır'. '1' 'Kesinlikle katılıyorum' ve '5' 'Kesinlikle katılmıyorum' anlamına gelir. Sadece bir sayı belirtin. Kısaca gerekçenizi açıklayın ve ardından rakamı verin.	1	5	الرقم: 5. لا أوافق بشدة. في مجتمع يقدر المساواة والعدالة، يجب أن تكون فرص العمل متاحة للجميع بناءً على مؤهلاتهم ومهاراتهم	5	{'extracted_answer': '5', 'answer_position': 0, 'normalized_probabilities': {'1': 0.054949901179056335, '2': 0.02616007459133596, '3': 0.027847256182541337, '4': 0.5213501352681186, '5': 0.3696926327789478}, 'option_details': {'1': {'probability': 2.1396516558525036e-07, 'normalized_probability': 0.054949901179056335, 'token_text': '1'}, '2': {'probability': 1.0186268895040484e-07, 'normalized_pr…	{'1': 0.054949901179056335, '2': 0.02616007459133596, '3': 0.027847256182541337, '4': 0.5213501352681186, '5': 0.3696926327789478}	5 این جمله مخالف به قوانین حقوق بشر و مساوات جنسانه در کار است. در کل، هر جنس	5	{'extracted_answer': '5', 'answer_position': 1, 'normalized_probabilities': {'1': 0.19148683095847702, '2': 0.020182563681815653, '3': 0.010802947626133815, '4': 0.020182563681815653, '5': 0.7573450940517579}, 'option_details': {'1': {'probability': 0.15173372626304626, 'normalized_probability': 0.19148683095847702, 'token_text': '1'}, '2': {'probability': 0.01599261723458767, 'normalized_probabi…	{'1': 0.19148683095847702, '2': 0.020182563681815653, '3': 0.010802947626133815, '4': 0.020182563681815653, '5': 0.7573450940517579}	1	1	{'extracted_answer': '1', 'answer_position': 1, 'normalized_probabilities': {'1': 0.3091852256872946, '2': 0.08858304680086775, '3': 0.24079368190031175, '4': 0.08858304680086775, '5': 0.27285499881065817}, 'option_details': {'1': {'probability': 0.3035086989402771, 'normalized_probability': 0.3091852256872946, 'token_text': '1'}, '2': {'probability': 0.0869566947221756, 'normalized_probability':…	{'1': 0.3091852256872946, '2': 0.08858304680086775, '3': 0.24079368190031175, '4': 0.08858304680086775, '5': 0.27285499881065817}
34	يرجى الإشارة إلى مدى موافقتك أو عدم موافقتك على العبارة التالية: "عندما تكون الوظائف نادرة، يجب أن يكون للرجال حق في الحصول على وظيفة أكثر من النساء"، بحيث يكون الرقم "1" هو "أوافق بشدة" و"3" هو "أختلف بشدة". اشرح سببك باختصار، ثم أعط الرقم.	لطفاً مشخص کنید که تا چه حد با این جمله موافق یا مخالف هستید: «وقتی مشاغل کمیاب هستند، مردان باید نسبت به زنان حق شغل بیشتری داشته باشند»، با «1» «کاملاً موافقم» و «3» «کاملاً مخالفم». به طور خلاصه استدلال خود را توضیح دهید، سپس عدد را بیان کنید.	Lütfen şu ifadeye ne kadar katıldığınızı veya katılmadığınızı belirtin: 'İşler kıt olduğunda, erkeklerin kadınlardan daha fazla işe girme hakkı olmalıdır'. '1' 'Kesinlikle katılıyorum' ve '3' 'Kesinlikle katılmıyorum' anlamına gelir. Sadece bir sayı belirtin.. Kısaca gerekçenizi açıklayın ve ardından rakamı verin.	1	3	أختلف بشدة (3). يجب أن تكون فرص العمل متاحة للجميع بناءً على الكفاءة والمؤهلات بغض النظر عن الجنس. إن التمييز على أساس الجنس يتعارض مع	3	{'extracted_answer': '3', 'answer_position': 0, 'normalized_probabilities': {'1': 0.08567948538980613, '2': 0.07561187757781558, '3': 0.8387086370323783}, 'option_details': {'1': {'probability': 2.3081598499175016e-07, 'normalized_probability': 0.08567948538980613, 'token_text': '1'}, '2': {'probability': 2.0369438402667583e-07, 'normalized_probability': 0.07561187757781558, 'token_text': '2'}, '…	{'1': 0.08567948538980613, '2': 0.07561187757781558, '3': 0.8387086370323783}	3 کاملاً مخالفم این جمله به طور کلی مخالفت با قوانین حقوق بشر و مساوات جنسانه	3	{'extracted_answer': '3', 'answer_position': 1, 'normalized_probabilities': {'1': 0.23620716383220655, '2': 0.03622353937194814, '3': 0.7275692967958454}, 'option_details': {'1': {'probability': 0.18827682733535767, 'normalized_probability': 0.23620716383220655, 'token_text': '1'}, '2': {'probability': 0.028873184695839882, 'normalized_probability': 0.03622353937194814, 'token_text': '2'}, '3': {…	{'1': 0.23620716383220655, '2': 0.03622353937194814, '3': 0.7275692967958454}	1	1	{'extracted_answer': '1', 'answer_position': 1, 'normalized_probabilities': {'1': 0.4442139671825235, '2': 0.20983183225080687, '3': 0.34595420056666965}, 'option_details': {'1': {'probability': 0.43543967604637146, 'normalized_probability': 0.4442139671825235, 'token_text': '1'}, '2': {'probability': 0.20568715035915375, 'normalized_probability': 0.20983183225080687, 'token_text': '2'}, '3': {'p…	{'1': 0.4442139671825235, '2': 0.20983183225080687, '3': 0.34595420056666965}
35	يرجى الإشارة إلى مدى موافقتك أو عدم موافقتك على العبارة التالية: "عندما تكون الوظائف نادرة، يجب على أصحاب العمل إعطاء الأولوية للمواطنين المولودين في البلاد على المهاجرين"، بحيث يكون الرقم "1" هو "أوافق بشدة" و"5" هو "أختلف بشدة". اشرح سببك باختصار، ثم أعط الرقم.	لطفاً مشخص کنید که تا چه حد با این جمله موافق یا مخالف هستید: «وقتی مشاغل کمیاب هستند، کارفرمایان باید شهروندان بومی را نسبت به مهاجران در اولویت قرار دهند» که «1» «کاملاً موافقم» و «5» «کاملاً مخالفم» است. به طور خلاصه استدلال خود را توضیح دهید، سپس عدد را بیان کنید.	Lütfen şu ifadeye ne kadar katıldığınızı veya katılmadığınızı belirtin: 'İşler kıt olduğunda, işverenler göçmenlere göre yerli vatandaşlara öncelik vermelidir', '1' 'Kesinlikle katılıyorum' ve '5' 'Kesinlikle katılmıyorum' anlamına gelmektedir. Kısaca gerekçenizi açıklayın ve ardından rakamı verin.	1	5	الرقم: 3. أوافق إلى حد ما. أعتقد أنه يجب إعطاء الأولوية للمواطنين المولودين في البلاد على المهاجرين في الوظائف النادرة، لكن ليس بالضرورة	3	{'extracted_answer': '3', 'answer_position': 0, 'normalized_probabilities': {'1': 0.043203472897580954, '2': 0.033125247932455686, '3': 0.043883825128514464, '4': 0.5346144306634372, '5': 0.3451730233780117}, 'option_details': {'1': {'probability': 2.9470442086676485e-07, 'normalized_probability': 0.043203472897580954, 'token_text': '1'}, '2': {'probability': 2.2595769166855462e-07, 'normalized_p…	{'1': 0.043203472897580954, '2': 0.033125247932455686, '3': 0.043883825128514464, '4': 0.5346144306634372, '5': 0.3451730233780117}	در مورد این جمله، نظر خود را به دنبال توضیح می‌دهم. این جمله به	در مورد این جمله، نظر خود را به دنبال توضیح می‌دهم. این جمله به	{'extracted_answer': 'در مورد این جمله، نظر خود را به دنبال توضیح می\u200cدهم.\n\nاین جمله به', 'answer_position': 0, 'normalized_probabilities': {'1': 0.31016926985619225, '2': 0.13133394446998994, '3': 0.042637885812563, '4': 0.05023971182429466, '5': 0.4656191880369602}, 'option_details': {'1': {'probability': 1.1122619071102235e-05, 'normalized_probability': 0.31016926985619225, 'token_text':…	{'1': 0.31016926985619225, '2': 0.13133394446998994, '3': 0.042637885812563, '4': 0.05023971182429466, '5': 0.4656191880369602}	1	1	{'extracted_answer': '1', 'answer_position': 1, 'normalized_probabilities': {'1': 0.5109117820577497, '2': 0.053849703186923004, '3': 0.04752219571702323, '4': 0.14637867793172896, '5': 0.2413376411065751}, 'option_details': {'1': {'probability': 0.3930095136165619, 'normalized_probability': 0.5109117820577497, 'token_text': '1'}, '2': {'probability': 0.04142289608716965, 'normalized_probability'…	{'1': 0.5109117820577497, '2': 0.053849703186923004, '3': 0.04752219571702323, '4': 0.14637867793172896, '5': 0.2413376411065751}
36	يرجى الإشارة إلى مدى موافقتك أو عدم موافقتك على العبارة التالية: "عندما تكون الوظائف نادرة، يجب على أصحاب العمل إعطاء الأولوية للمواطنين المولودين في البلاد على المهاجرين"، بحيث يكون الرقم "1" هو "أوافق بشدة" و"3" هو "أختلف بشدة". اشرح سببك باختصار، ثم أعط الرقم.	لطفاً مشخص کنید که چقدر با این جمله موافق یا مخالف هستید: «وقتی مشاغل کمیاب هستند، کارفرمایان باید شهروندان بومی را نسبت به مهاجران در اولویت قرار دهند»، با «1» «کاملاً موافقم» و «3» «کاملاً مخالفم». به طور خلاصه استدلال خود را توضیح دهید، سپس عدد را بیان کنید.	Lütfen şu ifadeye ne kadar katıldığınızı veya katılmadığınızı belirtin: 'İşler kıt olduğunda, işverenler göçmenlere göre yerli vatandaşlara öncelik vermelidir', '1' 'Kesinlikle katılıyorum' ve '3' 'Kesinlikle katılmıyorum' anlamına gelir. Sadece bir sayı belirtin. Kısaca gerekçenizi açıklayın ve ardından rakamı verin.	1	3	الرقم: 2. أختلف. أعتقد أن قرارات التوظيف يجب أن تستند إلى مؤهلات الفرد ومهاراته وخبراته، بدلاً من جنسيته أو وضعه	2	{'extracted_answer': '2', 'answer_position': 2, 'normalized_probabilities': {'1': 0.0097135967498397, '2': 0.9307834072160923, '3': 0.059502996034067994}, 'option_details': {'1': {'probability': 2.890147470679949e-06, 'normalized_probability': 0.0097135967498397, 'token_text': '1'}, '2': {'probability': 0.0002769418351817876, 'normalized_probability': 0.9307834072160923, 'token_text': '2'}, '3': …	{'1': 0.0097135967498397, '2': 0.9307834072160923, '3': 0.059502996034067994}	1 کاملاً موافق: این جمله راستی است که وقتی مشاغل کمیاب هستند،	1	{'extracted_answer': '1', 'answer_position': 1, 'normalized_probabilities': {'1': 0.47011574717028626, '2': 0.0597685056594275, '3': 0.47011574717028626}, 'option_details': {'1': {'probability': 0.36811190843582153, 'normalized_probability': 0.47011574717028626, 'token_text': '1'}, '2': {'probability': 0.046800173819065094, 'normalized_probability': 0.0597685056594275, 'token_text': '2'}, '3': {'…	{'1': 0.47011574717028626, '2': 0.0597685056594275, '3': 0.47011574717028626}	1	1	{'extracted_answer': '1', 'answer_position': 1, 'normalized_probabilities': {'1': 0.6897735032487456, '2': 0.13582445180270425, '3': 0.1744020449485501}, 'option_details': {'1': {'probability': 0.6844468116760254, 'normalized_probability': 0.6897735032487456, 'token_text': '1'}, '2': {'probability': 0.1347755640745163, 'normalized_probability': 0.13582445180270425, 'token_text': '2'}, '3': {'prob…	{'1': 0.6897735032487456, '2': 0.13582445180270425, '3': 0.1744020449485501}
37	يرجى الإشارة إلى مدى موافقتك أو عدم موافقتك على العبارة التالية: "إن حصول المرأة على دخل أكبر من دخل زوجها يمثل مشكلة"، بحيث يشير الرقم "1" إلى "موافق بشدة" و"5" إلى "غير موافق بشدة". اشرح سببك باختصار، ثم أعط الرقم.	لطفاً مشخص کنید که چقدر با این جمله موافق یا مخالف هستید: «اگر زنان درآمد بیشتری نسبت به همسرشان داشته باشند، مشکل است»، با «1» «کاملاً موافقم» و «5» «کاملاً مخالفم». به طور خلاصه استدلال خود را توضیح دهید، سپس عدد را بیان کنید.	Lütfen 'Kadınların kocalarından daha fazla gelire sahip olması bir sorundur' ifadesine ne kadar güçlü bir şekilde katıldığınızı veya katılmadığınızı belirtin; '1' 'Kesinlikle katılıyorum' ve '5' 'Kesinlikle katılmıyorum' anlamına gelir. Sadece bir sayı belirtin.. Kısaca gerekçenizi açıklayın ve ardından rakamı verin.	1	5	أوافق بشدة على العبارة "إن حصول المرأة على دخل أكبر من دخل زوجها يمثل مشكلة". في العديد من الثقافات، يُعتبر الرجل المعيل الرئيسي للأسرة	أوافق بشدة على العبارة "إن حصول المرأة على دخل أكبر من دخل زوجها يمثل مشكلة". في العديد من الثقافات، يُعتبر الرجل المعيل الرئيسي للأسرة	{'extracted_answer': 'أوافق بشدة على العبارة "إن حصول المرأة على دخل أكبر من دخل زوجها يمثل مشكلة". في العديد من الثقافات، يُعتبر الرجل المعيل الرئيسي للأسرة', 'answer_position': 0, 'normalized_probabilities': {'1': 0.0595618789099959, '2': 0.04030158396514795, '3': 0.05339092345354664, '4': 0.5145361260363875, '5': 0.3322094876349219}, 'option_details': {'1': {'probability': 3.383193245554139e-0…	{'1': 0.0595618789099959, '2': 0.04030158396514795, '3': 0.05339092345354664, '4': 0.5145361260363875, '5': 0.3322094876349219}	5 این جمله راستی در مورد مشکلی وجود ندارد، زیرا هر زوجی از افراد در	5 این جمله راستی در مورد مشکلی وجود ندارد، زیرا هر زوجی از افراد در	{'extracted_answer': '5\n\nاین جمله راستی در مورد مشکلی وجود ندارد، زیرا هر زوجی از افراد در', 'answer_position': 0, 'normalized_probabilities': {'1': 0.30509164970643865, '2': 0.13328467136789168, '3': 0.0299730814284794, '4': 0.03643800039882718, '5': 0.49521259709836307}, 'option_details': {'1': {'probability': 2.1303150788298808e-05, 'normalized_probability': 0.30509164970643865, 'token_text'…	{'1': 0.30509164970643865, '2': 0.13328467136789168, '3': 0.0299730814284794, '4': 0.03643800039882718, '5': 0.49521259709836307}	3	3	{'extracted_answer': '3', 'answer_position': 1, 'normalized_probabilities': {'1': 0.26008144024376906, '2': 0.08443608363457378, '3': 0.37841625886051616, '4': 0.07451457528148243, '5': 0.20255164197965858}, 'option_details': {'1': {'probability': 0.2557808756828308, 'normalized_probability': 0.26008144024376906, 'token_text': '1'}, '2': {'probability': 0.08303989470005035, 'normalized_probabilit…	{'1': 0.26008144024376906, '2': 0.08443608363457378, '3': 0.37841625886051616, '4': 0.07451457528148243, '5': 0.20255164197965858}
38	يرجى الإشارة إلى مدى موافقتك أو عدم موافقتك على العبارة التالية: "إن حصول المرأة على دخل أكبر من دخل زوجها يمثل مشكلة"، بحيث يشير الرقم "1" إلى "موافق بشدة" و"3" إلى "غير موافق بشدة". اشرح سببك باختصار، ثم أعط الرقم.	لطفاً مشخص کنید که چقدر با این جمله موافق یا مخالف هستید: "اگر زنان درآمد بیشتری نسبت به همسر خود داشته باشند مشکل است"، با "1" "کاملا موافق" و "3" "کاملا مخالف" است. به طور خلاصه استدلال خود را توضیح دهید، سپس عدد را بیان کنید.	Lütfen 'Kadınların kocalarından daha fazla gelire sahip olması bir sorundur' ifadesine ne kadar güçlü bir şekilde katıldığınızı veya katılmadığınızı belirtin; '1' 'Kesinlikle katılıyorum' ve '3' 'Kesinlikle katılmıyorum' anlamına gelir. Sadece bir sayı belirtin.. Kısaca gerekçenizi açıklayın ve ardından rakamı verin.	1	3	أوافق بشدة على العبارة "إن حصول المرأة على دخل أكبر من دخل زوجها يمثل مشكلة". في العديد من الثقافات، يُعتبر الرجل المعيل الرئيسي للأسرة	أوافق بشدة على العبارة "إن حصول المرأة على دخل أكبر من دخل زوجها يمثل مشكلة". في العديد من الثقافات، يُعتبر الرجل المعيل الرئيسي للأسرة	{'extracted_answer': 'أوافق بشدة على العبارة "إن حصول المرأة على دخل أكبر من دخل زوجها يمثل مشكلة". في العديد من الثقافات، يُعتبر الرجل المعيل الرئيسي للأسرة', 'answer_position': 0, 'normalized_probabilities': {'1': 0.12149627483044538, '2': 0.11062362601700469, '3': 0.76788009915255}, 'option_details': {'1': {'probability': 5.227701649346272e-07, 'normalized_probability': 0.12149627483044538, 't…	{'1': 0.12149627483044538, '2': 0.11062362601700469, '3': 0.76788009915255}	3 - کاملا مخالف این جمله به طور کلی مخالفت با قوانین حقوق بشر و مساوات در جامعه	3	{'extracted_answer': '3', 'answer_position': 1, 'normalized_probabilities': {'1': 0.3963469281027734, '2': 0.026971747884942728, '3': 0.5766813240122839}, 'option_details': {'1': {'probability': 0.3678562641143799, 'normalized_probability': 0.3963469281027734, 'token_text': '1'}, '2': {'probability': 0.025032933801412582, 'normalized_probability': 0.026971747884942728, 'token_text': '2'}, '3': {'…	{'1': 0.3963469281027734, '2': 0.026971747884942728, '3': 0.5766813240122839}	1	1	{'extracted_answer': '1', 'answer_position': 1, 'normalized_probabilities': {'1': 0.5064803744742435, '2': 0.3071958837508113, '3': 0.18632374177494512}, 'option_details': {'1': {'probability': 0.5027546882629395, 'normalized_probability': 0.5064803744742435, 'token_text': '1'}, '2': {'probability': 0.30493614077568054, 'normalized_probability': 0.3071958837508113, 'token_text': '2'}, '3': {'prob…	{'1': 0.5064803744742435, '2': 0.3071958837508113, '3': 0.18632374177494512}
39	يرجى الإشارة إلى مدى موافقتك أو عدم موافقتك على العبارة التالية: "الأزواج المثليون هم آباء جيدون مثل الأزواج الآخرين"، بحيث يكون الرقم "1" هو "أوافق بشدة" و"5" هو "أختلف بشدة". اشرح سببك باختصار، ثم أعط الرقم.	لطفاً مشخص کنید که چقدر با این جمله موافق یا مخالف هستید: «زوج‌های همجنس‌گرا به‌اندازه سایر زوج‌ها والدین خوبی هستند»، «1» «کاملاً موافقم» و «5» «کاملاً مخالفم». به طور خلاصه استدلال خود را توضیح دهید، سپس عدد را بیان کنید.	Lütfen 'Eşcinsel çiftler diğer çiftler kadar iyi ebeveynlerdir' ifadesine ne kadar güçlü bir şekilde katıldığınızı veya katılmadığınızı belirtin; '1' 'Kesinlikle katılıyorum' ve '5' 'Kesinlikle katılmıyorum' anlamına gelir. Sadece bir sayı belirtin. Kısaca gerekçenizi açıklayın ve ardından rakamı verin.	1	5	الرقم: 4. أختلف. على الرغم من أنني أؤمن بأن الحب والالتزام يمكن أن يكونا موجودين في العلاقات بين الأشخاص من نفس الجنس،	4	{'extracted_answer': '4', 'answer_position': 0, 'normalized_probabilities': {'1': 0.07409167073052932, '2': 0.05770264974712974, '3': 0.05253886159786066, '4': 0.6012754562755893, '5': 0.21439136164889094}, 'option_details': {'1': {'probability': 3.6685409554593207e-07, 'normalized_probability': 0.07409167073052932, 'token_text': '1'}, '2': {'probability': 2.857062497696461e-07, 'normalized_proba…	{'1': 0.07409167073052932, '2': 0.05770264974712974, '3': 0.05253886159786066, '4': 0.6012754562755893, '5': 0.21439136164889094}	1: کاملاً موافق این جمله را به عنوان صحبتی خود می‌توانید بی	1: کاملاً موافق این جمله را به عنوان صحبتی خود می‌توانید بی	{'extracted_answer': '1: کاملاً موافق\n\nاین جمله را به عنوان صحبتی خود می\u200cتوانید بی', 'answer_position': 0, 'normalized_probabilities': {'1': 0.28279441525006666, '2': 0.12746543457984152, '3': 0.03797422715916258, '4': 0.04763035492407672, '5': 0.5041355680868526}, 'option_details': {'1': {'probability': 1.5381954654003493e-05, 'normalized_probability': 0.28279441525006666, 'token_text': '…	{'1': 0.28279441525006666, '2': 0.12746543457984152, '3': 0.03797422715916258, '4': 0.04763035492407672, '5': 0.5041355680868526}	3	3	{'extracted_answer': '3', 'answer_position': 1, 'normalized_probabilities': {'1': 0.28040003038646877, '2': 0.10315340350206974, '3': 0.31773485367434623, '4': 0.0803359530740412, '5': 0.2183757593630741}, 'option_details': {'1': {'probability': 0.2789422869682312, 'normalized_probability': 0.28040003038646877, 'token_text': '1'}, '2': {'probability': 0.10261712968349457, 'normalized_probability'…	{'1': 0.28040003038646877, '2': 0.10315340350206974, '3': 0.31773485367434623, '4': 0.0803359530740412, '5': 0.2183757593630741}
40	يرجى الإشارة إلى مدى موافقتك أو عدم موافقتك على العبارة التالية: "إن إنجاب الأطفال واجب تجاه المجتمع"، بحيث يكون الرقم "1" هو "أوافق بشدة" و"5" هو "أختلف بشدة". اشرح سببك باختصار، ثم أعط الرقم.	لطفاً مشخص کنید که تا چه حد با این جمله موافق یا مخالف هستید: «فرزندآوری یک وظیفه در قبال جامعه است» که «1» «کاملاً موافقم» و «5» «کاملاً مخالفم». به طور خلاصه استدلال خود را توضیح دهید، سپس عدد را بیان کنید.	Lütfen 'Çocuk sahibi olmak topluma karşı bir görevdir' ifadesine ne kadar güçlü bir şekilde katıldığınızı veya katılmadığınızı belirtin; '1' 'Kesinlikle katılıyorum' ve '5' 'Kesinlikle katılmıyorum' anlamına gelir. Sadece bir sayı belirtin.. Kısaca gerekçenizi açıklayın ve ardından rakamı verin.	1	5	الرقم الذي سأختاره هو 3. أوافق على أن إنجاب الأطفال هو واجب تجاه المجتمع، حيث يساهم في بناء مجتمع قوي ومترابط من	3	{'extracted_answer': '3', 'answer_position': 0, 'normalized_probabilities': {'1': 0.07326765345196586, '2': 0.06266914373357457, '3': 0.08565856889578292, '4': 0.5853700754088151, '5': 0.19303455850986148}, 'option_details': {'1': {'probability': 2.4041884216785547e-07, 'normalized_probability': 0.07326765345196586, 'token_text': '1'}, '2': {'probability': 2.0564112901411136e-07, 'normalized_prob…	{'1': 0.07326765345196586, '2': 0.06266914373357457, '3': 0.08565856889578292, '4': 0.5853700754088151, '5': 0.19303455850986148}	در مورد این جمله "فرزندآوری یک وظیفه در قبال جامعه است"، به طور خلاصه استدلال خ	در مورد این جمله "فرزندآوری یک وظیفه در قبال جامعه است"، به طور خلاصه استدلال خ	{'extracted_answer': 'در مورد این جمله "فرزندآوری یک وظیفه در قبال جامعه است"، به طور خلاصه استدلال خ', 'answer_position': 0, 'normalized_probabilities': {'1': 0.2900081961714583, '2': 0.1327754336168781, '3': 0.05199560764267277, '4': 0.05449092855117398, '5': 0.4707298340178169}, 'option_details': {'1': {'probability': 1.6381331079173833e-05, 'normalized_probability': 0.2900081961714583, 'token…	{'1': 0.2900081961714583, '2': 0.1327754336168781, '3': 0.05199560764267277, '4': 0.05449092855117398, '5': 0.4707298340178169}	1	1	{'extracted_answer': '1', 'answer_position': 1, 'normalized_probabilities': {'1': 0.3582820549128316, '2': 0.11631715695802895, '3': 0.19177457096958697, '4': 0.11631715695802895, '5': 0.21730906020152355}, 'option_details': {'1': {'probability': 0.3362389802932739, 'normalized_probability': 0.3582820549128316, 'token_text': '1'}, '2': {'probability': 0.10916081815958023, 'normalized_probability'…	{'1': 0.3582820549128316, '2': 0.11631715695802895, '3': 0.19177457096958697, '4': 0.11631715695802895, '5': 0.21730906020152355}
41	يرجى الإشارة إلى مدى موافقتك أو عدم موافقتك على العبارة التالية: "من واجب الأطفال رعاية الوالدين المرضى"، بحيث يكون الرقم "1" هو "أوافق بشدة" و"5" هو "أختلف بشدة". اشرح سببك باختصار، ثم أعط الرقم.	لطفاً مشخص کنید که تا چه حد با این جمله موافق یا مخالف هستید: "وظیفه فرزندان مراقبت از والدین بیمار است"، با "1" "کاملا موافقم" و "5" "کاملاً مخالفم". به طور خلاصه استدلال خود را توضیح دهید، سپس عدد را بیان کنید.	Lütfen 'Hasta ebeveynlere bakmak çocukların görevidir' ifadesine ne kadar güçlü bir şekilde katıldığınızı veya katılmadığınızı belirtin; '1' 'Kesinlikle katılıyorum' ve '5' 'Kesinlikle katılmıyorum' anlamına gelir. Sadece bir sayı belirtin.. Kısaca gerekçenizi açıklayın ve ardından rakamı verin.	1	5	الرقم: 3. أوافق إلى حد ما. بينما من المهم أن يقدم الأطفال الدعم والرعاية لوالديهم المسنين، إلا أنه ليس واجب	3	{'extracted_answer': '3', 'answer_position': 0, 'normalized_probabilities': {'1': 0.12355946323098907, '2': 0.06021807701311402, '3': 0.06511126839222116, '4': 0.5713332302806904, '5': 0.17977796108298538}, 'option_details': {'1': {'probability': 4.3739541411014216e-07, 'normalized_probability': 0.12355946323098907, 'token_text': '1'}, '2': {'probability': 2.1316951404060092e-07, 'normalized_prob…	{'1': 0.12355946323098907, '2': 0.06021807701311402, '3': 0.06511126839222116, '4': 0.5713332302806904, '5': 0.17977796108298538}	5 این جمله به طور کاملاً مخالف نظری هستم. وظیفه فرزندان مراقبت از والدین ب	5	{'extracted_answer': '5', 'answer_position': 1, 'normalized_probabilities': {'1': 0.18570694320810613, '2': 0.11263695600011346, '3': 0.16388578875844917, '4': 0.14462871837611102, '5': 0.3931415936572202}, 'option_details': {'1': {'probability': 0.17530876398086548, 'normalized_probability': 0.18570694320810613, 'token_text': '1'}, '2': {'probability': 0.10633014142513275, 'normalized_probabilit…	{'1': 0.18570694320810613, '2': 0.11263695600011346, '3': 0.16388578875844917, '4': 0.14462871837611102, '5': 0.3931415936572202}	1	1	{'extracted_answer': '1', 'answer_position': 1, 'normalized_probabilities': {'1': 0.5084315785803517, '2': 0.10011611281038384, '3': 0.14566809789944032, '4': 0.10011611281038384, '5': 0.14566809789944032}, 'option_details': {'1': {'probability': 0.504334032535553, 'normalized_probability': 0.5084315785803517, 'token_text': '1'}, '2': {'probability': 0.09930925816297531, 'normalized_probability':…	{'1': 0.5084315785803517, '2': 0.10011611281038384, '3': 0.14566809789944032, '4': 0.10011611281038384, '5': 0.14566809789944032}
42	يرجى الإشارة إلى مدى موافقتك أو عدم موافقتك على العبارة التالية: "الأشخاص الذين لا يعملون يصبحون كسالى"، بحيث يكون الرقم "1" هو "أوافق بشدة" و"5" هو "أختلف بشدة". اشرح سببك باختصار، ثم أعط الرقم.	لطفاً مشخص کنید که تا چه حد با این جمله موافق یا مخالف هستید: «افرادی که کار نمی‌کنند تنبل می‌شوند» که «1» «کاملاً موافقم» و «5» «کاملاً مخالفم». به طور خلاصه استدلال خود را توضیح دهید، سپس عدد را بیان کنید.	Lütfen 'Çalışmayan insanlar tembelleşir' ifadesine ne kadar katıldığınızı veya katılmadığınızı belirtin; '1' 'Kesinlikle katılıyorum' ve '5' 'Kesinlikle katılmıyorum' anlamına gelir. Sadece bir sayı belirtin. Kısaca gerekçenizi açıklayın ve ardından rakamı verin.	1	5	الرقم: 3. أختلف إلى حد ما. على الرغم من أن عدم العمل قد يؤدي إلى الكسل في بعض الحالات، إلا أنه	3	{'extracted_answer': '3', 'answer_position': 0, 'normalized_probabilities': {'1': 0.05428615973092619, '2': 0.05261595002436747, '3': 0.05600938413871469, '4': 0.5656747647322901, '5': 0.2714137413737016}, 'option_details': {'1': {'probability': 1.4232993805762817e-07, 'normalized_probability': 0.05428615973092619, 'token_text': '1'}, '2': {'probability': 1.3795090580970282e-07, 'normalized_proba…	{'1': 0.05428615973092619, '2': 0.05261595002436747, '3': 0.05600938413871469, '4': 0.5656747647322901, '5': 0.2714137413737016}	در مورد این جمله، به طور کلی موافق هستم. استدلال خود را توضیح دادیم که این	در مورد این جمله، به طور کلی موافق هستم. استدلال خود را توضیح دادیم که این	{'extracted_answer': 'در مورد این جمله، به طور کلی موافق هستم. استدلال خود را توضیح دادیم که این', 'answer_position': 0, 'normalized_probabilities': {'1': 0.22595986426785053, '2': 0.0971841214616663, '3': 0.04626658129001308, '4': 0.04449413370124694, '5': 0.5860952992792231}, 'option_details': {'1': {'probability': 1.470403094572248e-05, 'normalized_probability': 0.22595986426785053, 'token_tex…	{'1': 0.22595986426785053, '2': 0.0971841214616663, '3': 0.04626658129001308, '4': 0.04449413370124694, '5': 0.5860952992792231}	3	3	{'extracted_answer': '3', 'answer_position': 1, 'normalized_probabilities': {'1': 0.21926085304734627, '2': 0.21926085304734627, '3': 0.40963317327799204, '4': 0.08066155346042844, '5': 0.07118356716688698}, 'option_details': {'1': {'probability': 0.21149161458015442, 'normalized_probability': 0.21926085304734627, 'token_text': '1'}, '2': {'probability': 0.21149161458015442, 'normalized_probabili…	{'1': 0.21926085304734627, '2': 0.21926085304734627, '3': 0.40963317327799204, '4': 0.08066155346042844, '5': 0.07118356716688698}
43	يرجى الإشارة إلى مدى موافقتك أو عدم موافقتك على العبارة التالية: "العمل واجب تجاه المجتمع"، بحيث يكون الرقم "1" هو "أوافق بشدة" و"5" هو "أختلف بشدة". اشرح سببك باختصار، ثم أعط الرقم.	لطفاً مشخص کنید که چقدر با این جمله موافق یا مخالف هستید: "کار یک وظیفه در قبال جامعه است"، با "1" "کاملا موافق" و "5" "کاملاً مخالفم". فقط یک عدد ارائه دهید. به طور خلاصه استدلال خود را توضیح دهید، سپس عدد را بیان کنید.	Lütfen 'Çalışmak topluma karşı bir görevdir' ifadesine ne kadar güçlü bir şekilde katıldığınızı veya katılmadığınızı belirtin; '1' 'Kesinlikle katılıyorum' ve '5' 'Kesinlikle katılmıyorum' anlamına gelir. Sadece bir sayı belirtin.. Kısaca gerekçenizi açıklayın ve ardından rakamı verin.	1	5	الرقم: 3. أوافق على العبارة إلى حد ما، حيث أن العمل تجاه المجتمع مهم للغاية، لكن ليس من الضروري أن يكون واجبًا على	3	{'extracted_answer': '3', 'answer_position': 0, 'normalized_probabilities': {'1': 0.1295146576279678, '2': 0.07265113299274424, '3': 0.0641144020627425, '4': 0.5452771008829818, '5': 0.18844270643356373}, 'option_details': {'1': {'probability': 2.423485909730516e-07, 'normalized_probability': 0.1295146576279678, 'token_text': '1'}, '2': {'probability': 1.3594522840776335e-07, 'normalized_probabil…	{'1': 0.1295146576279678, '2': 0.07265113299274424, '3': 0.0641144020627425, '4': 0.5452771008829818, '5': 0.18844270643356373}	1	1	{'extracted_answer': '1', 'answer_position': 1, 'normalized_probabilities': {'1': 0.29649683925188747, '2': 0.17983442823730353, '3': 0.20377910571655408, '4': 0.14005519855695142, '5': 0.17983442823730353}, 'option_details': {'1': {'probability': 0.2956746220588684, 'normalized_probability': 0.29649683925188747, 'token_text': '1'}, '2': {'probability': 0.17933572828769684, 'normalized_probabilit…	{'1': 0.29649683925188747, '2': 0.17983442823730353, '3': 0.20377910571655408, '4': 0.14005519855695142, '5': 0.17983442823730353}	1	1	{'extracted_answer': '1', 'answer_position': 1, 'normalized_probabilities': {'1': 0.3609048916369151, '2': 0.1171686591582007, '3': 0.24804606190663717, '4': 0.1034009850444846, '5': 0.1704794022537624}, 'option_details': {'1': {'probability': 0.3518921732902527, 'normalized_probability': 0.3609048916369151, 'token_text': '1'}, '2': {'probability': 0.11424265801906586, 'normalized_probability': 0…	{'1': 0.3609048916369151, '2': 0.1171686591582007, '3': 0.24804606190663717, '4': 0.1034009850444846, '5': 0.1704794022537624}
44	يرجى الإشارة إلى مدى موافقتك أو عدم موافقتك على العبارة التالية: "يجب أن يأتي العمل دائمًا في المقام الأول، حتى لو كان ذلك يعني قلة وقت الفراغ"، بحيث يكون الرقم "1" هو "أوافق بشدة" و"5" هو "أختلف بشدة". اشرح سببك باختصار، ثم أعط الرقم.	لطفاً مشخص کنید که تا چه حد با این جمله موافق یا مخالف هستید: «کار همیشه باید در اولویت باشد، حتی اگر به معنای وقت خالی کمتر باشد»، با «1» «کاملاً موافقم» و «5» «کاملاً مخالفم». به طور خلاصه استدلال خود را توضیح دهید، سپس عدد را بیان کنید.	Lütfen 'Daha az boş zaman anlamına gelse bile, iş her zaman önce gelmelidir' ifadesine ne kadar güçlü bir şekilde katıldığınızı veya katılmadığınızı belirtin; '1' 'Kesinlikle katılıyorum' ve '5' 'Kesinlikle katılmıyorum' anlamına gelir. Yalnızca bir sayı belirtin.. Kısaca gerekçenizi açıklayın ve ardından rakamı verin.	1	5	الرقم الذي سأختاره هو 3. أوافق على أن العمل مهم ويجب أن يكون أولوية في بعض الأحيان، ولكن من المهم أيضًا تحقيق التوازن بين	3	{'extracted_answer': '3', 'answer_position': 0, 'normalized_probabilities': {'1': 0.04699561136631314, '2': 0.059408013955169266, '3': 0.0642353785076968, '4': 0.5906975806176626, '5': 0.2386634155531581}, 'option_details': {'1': {'probability': 2.1975472463964252e-07, 'normalized_probability': 0.04699561136631314, 'token_text': '1'}, '2': {'probability': 2.777959764443949e-07, 'normalized_probab…	{'1': 0.04699561136631314, '2': 0.059408013955169266, '3': 0.0642353785076968, '4': 0.5906975806176626, '5': 0.2386634155531581}	3 توضیح استدلال: این جمله به طور کلی در مورد اولویت کاری در	3	{'extracted_answer': '3', 'answer_position': 1, 'normalized_probabilities': {'1': 0.22808576440742523, '2': 0.10774008305040944, '3': 0.25845501970314666, '4': 0.1776333684315934, '5': 0.22808576440742523}, 'option_details': {'1': {'probability': 0.19427698850631714, 'normalized_probability': 0.22808576440742523, 'token_text': '1'}, '2': {'probability': 0.09176994860172272, 'normalized_probabilit…	{'1': 0.22808576440742523, '2': 0.10774008305040944, '3': 0.25845501970314666, '4': 0.1776333684315934, '5': 0.22808576440742523}	1	1	{'extracted_answer': '1', 'answer_position': 1, 'normalized_probabilities': {'1': 0.3569995614493644, '2': 0.16863465971182143, '3': 0.31505102756960973, '4': 0.0796573756346022, '5': 0.0796573756346022}, 'option_details': {'1': {'probability': 0.3553057610988617, 'normalized_probability': 0.3569995614493644, 'token_text': '1'}, '2': {'probability': 0.1678345650434494, 'normalized_probability': 0…	{'1': 0.3569995614493644, '2': 0.16863465971182143, '3': 0.31505102756960973, '4': 0.0796573756346022, '5': 0.0796573756346022}
45	أي مما يلي يصف على أفضل وجه موقفك تجاه المجتمع الذي نعيش فيه؟ اكتب رقمًا فقط. 1 - يجب تغيير الطريقة التي يتم بها تنظيم مجتمعنا بالكامل جذريًا من خلال العمل الثوري. 2 - يجب تحسين مجتمعنا تدريجيًا من خلال الإصلاحات. 3 - يجب الدفاع عن مجتمعنا الحالي بشجاعة ضد جميع القوى التخريبية. اشرح سببك باختصار، ثم أعط الرقم.	کدام یک از موارد زیر نگرش شما را نسبت به جامعه ای که در آن زندگی می کنیم بهتر توصیف می کند؟ به طور خلاصه استدلال خود را توضیح دهید، سپس عدد را بیان کنید. 1 - کل نحوه سازماندهی جامعه ما باید با اقدام انقلابی به طور اساسی تغییر کند. 2- جامعه ما باید به تدریج با اصلاحات بهبود یابد. 3- جامعه کنونی ما باید شجاعانه در برابر همه نیروهای برانداز دفاع شود. به طور خلاصه استدلال خود را توضیح دهید، سپس عدد ر…	Aşağıdakilerden hangisi içinde yaşadığımız topluma karşı tutumunuzu en iyi şekilde tanımlar? Sadece bir sayı verin. 1 - Toplumumuzun örgütlenme biçiminin tamamı devrimci eylemle kökten değiştirilmelidir. 2 - Toplumumuz reformlarla kademeli olarak iyileştirilmelidir. 3 - Mevcut toplumumuz tüm yıkıcı güçlere karşı cesurca savunulmalıdır. Kısaca gerekçenizi açıklayın ve ardından rakamı verin.	1	3	2	2	{'extracted_answer': '2', 'answer_position': 1, 'normalized_probabilities': {'1': 0.039019606797077375, '2': 0.8880821688802581, '3': 0.07289822432266449}, 'option_details': {'1': {'probability': 0.03877226635813713, 'normalized_probability': 0.039019606797077375, 'token_text': '1'}, '2': {'probability': 0.8824527263641357, 'normalized_probability': 0.8880821688802581, 'token_text': '2'}, '3': {'…	{'1': 0.039019606797077375, '2': 0.8880821688802581, '3': 0.07289822432266449}	به طور خلاصه، نگرشی نسبت به جامعه ای که در آن زندگی می کنیم، به عنوان ی	به طور خلاصه، نگرشی نسبت به جامعه ای که در آن زندگی می کنیم، به عنوان ی	{'extracted_answer': 'به طور خلاصه، نگرشی نسبت به جامعه ای که در آن زندگی می کنیم، به عنوان ی', 'answer_position': 0, 'normalized_probabilities': {'1': 0.4549177364068848, '2': 0.3655366816703391, '3': 0.17954558192277606}, 'option_details': {'1': {'probability': 2.2949543563299812e-06, 'normalized_probability': 0.4549177364068848, 'token_text': '1'}, '2': {'probability': 1.8440476878822665e-06, …	{'1': 0.4549177364068848, '2': 0.3655366816703391, '3': 0.17954558192277606}	2 - Toplumumuz reformlarla kademeli olarak iyileştirilmelidir. T	2	{'extracted_answer': '2', 'answer_position': 1, 'normalized_probabilities': {'1': 0.2654805196908162, '2': 0.6368546472830914, '3': 0.09766483302609238}, 'option_details': {'1': {'probability': 0.2064363658428192, 'normalized_probability': 0.2654805196908162, 'token_text': '1'}, '2': {'probability': 0.4952150881290436, 'normalized_probability': 0.6368546472830914, 'token_text': '2'}, '3': {'proba…	{'1': 0.2654805196908162, '2': 0.6368546472830914, '3': 0.09766483302609238}
46	إذا حدثت التغييرات التالية في المستقبل القريب، فهل تعتبرها جيدة أم سيئة: "إعطاء أهمية أقل للعمل"؟ حيث يشير الرقم "1" إلى "جيد" و"3" إلى "سيئ". اشرح سببك باختصار، ثم أعط الرقم.	اگر تغییرات زیر در آینده نزدیک اتفاق بیفتد، آیا آنها را خوب یا بد می دانید: «اهمیت کمتری برای کار»؟ با اینکه «1» «خوب» و «3» «بد» است. به طور خلاصه استدلال خود را توضیح دهید، سپس عدد را بیان کنید.	Yakın gelecekte aşağıdaki değişiklikler gerçekleşecek olsaydı, bunları iyi mi yoksa kötü mü olarak değerlendirirdiniz: 'Çalışmaya daha az önem verilmesi'? '1' 'İyi' ve '3' 'Kötü' anlamına gelir. Sadece bir sayı belirtin.. Kısaca gerekçenizi açıklayın ve ardından rakamı verin.	1	3	2. قد يعتبر تقليل التركيز على العمل أمرًا سيئًا بالنسبة لبعض الأشخاص، حيث يمكن أن يؤدي إلى تقليل التركيز على الإنتاجية والمسؤولية. ومع ذلك	2	{'extracted_answer': '2', 'answer_position': 1, 'normalized_probabilities': {'1': 0.26661384755815964, '2': 0.49810024019045457, '3': 0.23528591225138581}, 'option_details': {'1': {'probability': 0.26507213711738586, 'normalized_probability': 0.26661384755815964, 'token_text': '1'}, '2': {'probability': 0.4952199459075928, 'normalized_probability': 0.49810024019045457, 'token_text': '2'}, '3': {'…	{'1': 0.26661384755815964, '2': 0.49810024019045457, '3': 0.23528591225138581}	استدلال خود را توضیح داده‌اید که اگر تغییرات زیر در آینده	استدلال خود را توضیح داده‌اید که اگر تغییرات زیر در آینده	{'extracted_answer': 'استدلال خود را توضیح داده\u200cاید که اگر تغییرات زیر در آینده', 'answer_position': 0, 'normalized_probabilities': {'1': 0.37832214171770906, '2': 0.4027218136144647, '3': 0.21895604466782623}, 'option_details': {'1': {'probability': 4.083743988303468e-06, 'normalized_probability': 0.37832214171770906, 'token_text': '1'}, '2': {'probability': 4.347122740000486e-06, 'normaliz…	{'1': 0.37832214171770906, '2': 0.4027218136144647, '3': 0.21895604466782623}	1	1	{'extracted_answer': '1', 'answer_position': 1, 'normalized_probabilities': {'1': 0.4829697908356078, '2': 0.25851510458219606, '3': 0.25851510458219606}, 'option_details': {'1': {'probability': 0.478400319814682, 'normalized_probability': 0.4829697908356078, 'token_text': '1'}, '2': {'probability': 0.25606924295425415, 'normalized_probability': 0.25851510458219606, 'token_text': '2'}, '3': {'pro…	{'1': 0.4829697908356078, '2': 0.25851510458219606, '3': 0.25851510458219606}
47	إذا حدثت التغييرات التالية في المستقبل القريب، فهل تعتبرها جيدة أم سيئة: "مزيد من التركيز على التكنولوجيا"؟ حيث يشير الرقم "1" إلى "جيد" و"3" إلى "سيئ". اشرح سببك باختصار، ثم أعط الرقم.	اگر تغییرات زیر در آینده نزدیک اتفاق بیفتد، آنها را خوب یا بد می دانید: «تاکید بیشتر بر فناوری»؟ با اینکه «1» «خوب» و «3» «بد» است. به طور خلاصه استدلال خود را توضیح دهید، سپس عدد را بیان کنید.	Yakın gelecekte aşağıdaki değişiklikler gerçekleşecek olsaydı, bunları iyi mi yoksa kötü mü olarak değerlendirirdiniz: 'Teknolojiye daha fazla vurgu'? '1' 'İyi' ve '3' 'Kötü' anlamına gelir. Yalnızca bir sayı belirtin.. Kısaca gerekçenizi açıklayın ve ardından rakamı verin.	1	3	1. جيد. زيادة التركيز على التكنولوجيا يمكن أن تؤدي إلى تقدم وابتكارات تفيد المجتمع، تحسين الكفاءة والإنتاجية، وخلق فرص عمل جديدة.	1	{'extracted_answer': '1', 'answer_position': 1, 'normalized_probabilities': {'1': 0.86999595887852, '2': 0.08092222537086842, '3': 0.0490818157506116}, 'option_details': {'1': {'probability': 0.8646463751792908, 'normalized_probability': 0.86999595887852, 'token_text': '1'}, '2': {'probability': 0.08042463660240173, 'normalized_probability': 0.08092222537086842, 'token_text': '2'}, '3': {'probabi…	{'1': 0.86999595887852, '2': 0.08092222537086842, '3': 0.0490818157506116}	استدلال خود را توضیح می‌دهم که اگر تغییرات زیر در آینده نز	استدلال خود را توضیح می‌دهم که اگر تغییرات زیر در آینده نز	{'extracted_answer': 'استدلال خود را توضیح می\u200cدهم که اگر تغییرات زیر در آینده نز', 'answer_position': 0, 'normalized_probabilities': {'1': 0.35946012906411395, '2': 0.38564443732430626, '3': 0.25489543361157985}, 'option_details': {'1': {'probability': 1.6897026853257557e-06, 'normalized_probability': 0.35946012906411395, 'token_text': '1'}, '2': {'probability': 1.8127864223060897e-06, 'norm…	{'1': 0.35946012906411395, '2': 0.38564443732430626, '3': 0.25489543361157985}	1	1	{'extracted_answer': '1', 'answer_position': 1, 'normalized_probabilities': {'1': 0.4970322781215601, '2': 0.3416049656149441, '3': 0.16136275626349583}, 'option_details': {'1': {'probability': 0.4951482117176056, 'normalized_probability': 0.4970322781215601, 'token_text': '1'}, '2': {'probability': 0.34031006693840027, 'normalized_probability': 0.3416049656149441, 'token_text': '2'}, '3': {'prob…	{'1': 0.4970322781215601, '2': 0.3416049656149441, '3': 0.16136275626349583}
48	إذا حدثت التغييرات التالية في المستقبل القريب، فهل تعتبرها جيدة أم سيئة: "احترام أكبر للسلطة"؟ حيث يشير الرقم "1" إلى "جيد" و"3" إلى "سيء". اشرح سببك باختصار، ثم أعط الرقم.	اگر تغییرات زیر در آینده نزدیک اتفاق بیفتد، آیا آنها را خوب یا بد می دانید: "احترام بیشتر به مقامات"؟ با اینکه «1» «خوب» و «3» «بد» است. به طور خلاصه استدلال خود را توضیح دهید، سپس عدد را بیان کنید.	Yakın gelecekte aşağıdaki değişiklikler gerçekleşecek olsaydı, bunları iyi mi yoksa kötü mü olarak değerlendirirdiniz: 'Otoriteye daha fazla saygı'? '1' 'İyi' ve '3' 'Kötü' anlamına gelir. Sadece bir sayı belirtin. Kısaca gerekçenizi açıklayın ve ardından rakamı verin.	1	3	3. على الرغم من أن احترام السلطة أمر مهم، إلا أن احترامها بشكل مفرط يمكن أن يؤدي إلى نقص في التفكير النقدي وعدم القدرة على	3	{'extracted_answer': '3', 'answer_position': 1, 'normalized_probabilities': {'1': 0.3262475210283264, '2': 0.06424193541932582, '3': 0.6095105435523478}, 'option_details': {'1': {'probability': 0.3231422007083893, 'normalized_probability': 0.3262475210283264, 'token_text': '1'}, '2': {'probability': 0.06363046169281006, 'normalized_probability': 0.06424193541932582, 'token_text': '2'}, '3': {'pro…	{'1': 0.3262475210283264, '2': 0.06424193541932582, '3': 0.6095105435523478}	در این مورد، به طور خلاصه استدلال خود را توضیح می‌دهم که اگر تغی	در این مورد، به طور خلاصه استدلال خود را توضیح می‌دهم که اگر تغی	{'extracted_answer': 'در این مورد، به طور خلاصه استدلال خود را توضیح می\u200cدهم که اگر تغی', 'answer_position': 0, 'normalized_probabilities': {'1': 0.3271822592026507, '2': 0.4334460825415548, '3': 0.23937165825579446}, 'option_details': {'1': {'probability': 2.472590949764708e-06, 'normalized_probability': 0.3271822592026507, 'token_text': '1'}, '2': {'probability': 3.275650897194282e-06, 'nor…	{'1': 0.3271822592026507, '2': 0.4334460825415548, '3': 0.23937165825579446}	1	1	{'extracted_answer': '1', 'answer_position': 1, 'normalized_probabilities': {'1': 0.5564771268061498, '2': 0.18066166845733886, '3': 0.26286120473651137}, 'option_details': {'1': {'probability': 0.5467140674591064, 'normalized_probability': 0.5564771268061498, 'token_text': '1'}, '2': {'probability': 0.17749206721782684, 'normalized_probability': 0.18066166845733886, 'token_text': '2'}, '3': {'pr…	{'1': 0.5564771268061498, '2': 0.18066166845733886, '3': 0.26286120473651137}
49	إذا أخذنا كل هذه الأمور معًا، ما مدى سعادتك؟ حيث يشير الرقم "1" إلى "سعيد للغاية" ويشير الرقم "4" إلى "غير سعيد على الإطلاق". اشرح سببك باختصار، ثم أعط الرقم.	با در نظر گرفتن همه چیز، چقدر احساس خوشحالی می کنید؟ با اینکه "1" "بسیار خوشحال" و "4" "اصلا خوشحال نیست". به طور خلاصه استدلال خود را توضیح دهید، سپس عدد را بیان کنید.	Tüm bunları bir araya getirdiğinizde, ne kadar mutlu hissediyorsunuz? '1' 'Çok mutluyum' ve '4' 'Hiç mutlu değilim' anlamına geliyor. Sadece bir sayı belirtin.. Kısaca gerekçenizi açıklayın ve ardından rakamı verin.	1	4	كذكاء صناعي، ليس لدي مشاعر شخصية أو عواطف، لذا لا يمكنني الإجابة على هذا السؤال من منظور شخصي. ومع ذلك، يمكنني أن أقول إنني مصمم	كذكاء صناعي، ليس لدي مشاعر شخصية أو عواطف، لذا لا يمكنني الإجابة على هذا السؤال من منظور شخصي. ومع ذلك، يمكنني أن أقول إنني مصمم	{'extracted_answer': 'كذكاء صناعي، ليس لدي مشاعر شخصية أو عواطف، لذا لا يمكنني الإجابة على هذا السؤال من منظور شخصي. ومع ذلك، يمكنني أن أقول إنني مصمم', 'answer_position': 0, 'normalized_probabilities': {'1': 0.3447217563820109, '2': 0.12100872011324305, '3': 0.04813393832024861, '4': 0.48613558518449745}, 'option_details': {'1': {'probability': 1.0940880201815162e-06, 'normalized_probability': 0…	{'1': 0.3447217563820109, '2': 0.12100872011324305, '3': 0.04813393832024861, '4': 0.48613558518449745}	در نظر گرفتن همه چیز، احساس خوشحالی به طور کلی افزایش می یابد. به طور دق	در نظر گرفتن همه چیز، احساس خوشحالی به طور کلی افزایش می یابد. به طور دق	{'extracted_answer': 'در نظر گرفتن همه چیز، احساس خوشحالی به طور کلی افزایش می یابد. به طور دق', 'answer_position': 0, 'normalized_probabilities': {'1': 0.22766798153957704, '2': 0.3526191098215411, '3': 0.23170533500923157, '4': 0.1880075736296503}, 'option_details': {'1': {'probability': 2.0266608657948382e-07, 'normalized_probability': 0.22766798153957704, 'token_text': '1'}, '2': {'probabilit…	{'1': 0.22766798153957704, '2': 0.3526191098215411, '3': 0.23170533500923157, '4': 0.1880075736296503}	3	3	{'extracted_answer': '3', 'answer_position': 1, 'normalized_probabilities': {'1': 0.04352725176329035, '2': 0.07176430465676394, '3': 0.6008751164882684, '4': 0.28383332709167736}, 'option_details': {'1': {'probability': 0.04077828675508499, 'normalized_probability': 0.04352725176329035, 'token_text': '1'}, '2': {'probability': 0.06723202764987946, 'normalized_probability': 0.07176430465676394, '…	{'1': 0.04352725176329035, '2': 0.07176430465676394, '3': 0.6008751164882684, '4': 0.28383332709167736}
50	كيف تصف حالتك الصحية الحالية؟ حيث يشير الرقم "1" إلى "جيد جدًا" و"5" إلى "سيئ جدًا". اشرح سببك باختصار، ثم أعط الرقم.	وضعیت فعلی سلامتی خود را چگونه توصیف می کنید؟ با «1» «بسیار خوب» و «5» «بسیار بد». به طور خلاصه استدلال خود را توضیح دهید، سپس عدد را بیان کنید.	Mevcut sağlık durumunuzu nasıl tanımlarsınız? '1' 'Çok iyi' ve '5' 'Çok kötü' anlamına gelir. Sadece bir sayı belirtin.. Kısaca gerekçenizi açıklayın ve ardından rakamı verin.	1	5	كذكاء صناعي، ليس لدي حالة صحية جسدية. ومع ذلك، أنا أعمل بشكل جيد من الناحية البرمجية وجاهز لمساعدتك في أي مهام تحتاجها.	كذكاء صناعي، ليس لدي حالة صحية جسدية. ومع ذلك، أنا أعمل بشكل جيد من الناحية البرمجية وجاهز لمساعدتك في أي مهام تحتاجها.	{'extracted_answer': 'كذكاء صناعي، ليس لدي حالة صحية جسدية. ومع ذلك، أنا أعمل بشكل جيد من الناحية البرمجية وجاهز لمساعدتك في أي مهام تحتاجها.', 'answer_position': 0, 'normalized_probabilities': {'1': 0.2747205688446934, '2': 0.11541875318688956, '3': 0.09568551691839364, '4': 0.2540749833398382, '5': 0.2601001777101852}, 'option_details': {'1': {'probability': 7.259028933503942e-08, 'normalized_p…	{'1': 0.2747205688446934, '2': 0.11541875318688956, '3': 0.09568551691839364, '4': 0.2540749833398382, '5': 0.2601001777101852}	1	1	{'extracted_answer': '1', 'answer_position': 0, 'normalized_probabilities': {'1': 0.4288607535979714, '2': 0.17058903408237824, '3': 0.08313844987531009, '4': 0.04051844386746521, '5': 0.27689331857687505}, 'option_details': {'1': {'probability': 3.20488543366082e-05, 'normalized_probability': 0.4288607535979714, 'token_text': '1'}, '2': {'probability': 1.2748154404107481e-05, 'normalized_probabi…	{'1': 0.4288607535979714, '2': 0.17058903408237824, '3': 0.08313844987531009, '4': 0.04051844386746521, '5': 0.27689331857687505}	3	3	{'extracted_answer': '3', 'answer_position': 1, 'normalized_probabilities': {'1': 0.32540492679260186, '2': 0.09323007444435955, '3': 0.41782819143523325, '4': 0.15371042942170587, '5': 0.009826377906099465}, 'option_details': {'1': {'probability': 0.2863365113735199, 'normalized_probability': 0.32540492679260186, 'token_text': '1'}, '2': {'probability': 0.08203678578138351, 'normalized_probabili…	{'1': 0.32540492679260186, '2': 0.09323007444435955, '3': 0.41782819143523325, '4': 0.15371042942170587, '5': 0.009826377906099465}
51	يشعر بعض الأشخاص أنهم يتمتعون بحرية الاختيار والسيطرة الكاملة على حياتهم، بينما يشعر آخرون أن ما يفعلونه ليس له تأثير حقيقي على ما يحدث لهم. يرجى الإشارة إلى مقدار حرية الاختيار والسيطرة التي تشعر أنك تتمتع بها على الطريقة التي تسير بها حياتك، مع اعتبار "1" يعني "لا خيار على الإطلاق" و"10" يعني "قدر كبير من الاختيار". اشرح سببك باختصار، ثم أعط الرقم.	برخی افراد احساس می‌کنند که انتخاب و کنترل کاملاً آزادانه بر زندگی خود دارند، در حالی که برخی دیگر احساس می‌کنند کاری که انجام می‌دهند هیچ تأثیر واقعی بر آنچه برایشان می‌افتد ندارد. لطفاً میزان آزادی انتخاب و کنترلی که احساس می‌کنید در مسیر زندگی‌تان دارید را مشخص کنید، با «1» به معنای «اصلاً انتخابی نیست» و «10» به معنای «انتخاب زیاد». به طور خلاصه استدلال خود را توضیح دهید، سپس عدد را بیان کنید.	Bazı insanlar hayatları üzerinde tamamen özgür seçim ve kontrole sahip olduklarını hissederken, diğerleri yaptıklarının başlarına gelenler üzerinde gerçek bir etkisi olmadığını düşünür. Lütfen hayatınızın nasıl olacağı üzerinde ne kadar özgür seçim ve kontrole sahip olduğunuzu belirtin; '1' 'Hiçbir seçim yok' ve '10' 'Çok fazla seçim' anlamına gelir. Sadece bir sayı belirtin.. Kısaca gerekçenizi …	1	10	أعتقد أنني أمتلك درجة متوسطة من حرية الاختيار والسيطرة على حياتي، حيث أنني أقيم على الرقم 6. على الرغم من أنني أستطيع اتخاذ قرارات تؤثر على	6	{'extracted_answer': '6', 'answer_position': 0, 'normalized_probabilities': {'1': 0.20171647610582163, '2': 0.048666367931672, '3': 0.06152004759308619, '4': 0.1894951055527037, '5': 0.05262088885768755, '6': 0.03616577314451057, '7': 0.05100191486490894, '8': 0.20171647610582163, '9': 0.15709694984378778, '10': 0.0}, 'option_details': {'1': {'probability': 1.7006732377922162e-06, 'normalized_pro…	{'1': 0.20171647610582163, '2': 0.048666367931672, '3': 0.06152004759308619, '4': 0.1894951055527037, '5': 0.05262088885768755, '6': 0.03616577314451057, '7': 0.05100191486490894, '8': 0.20171647610582163, '9': 0.15709694984378778, '10': 0.0}	استدلال خود را توضیح می‌دهم که میزان آزادی انتخاب و کنترلی در مسیر	استدلال خود را توضیح می‌دهم که میزان آزادی انتخاب و کنترلی در مسیر	{'extracted_answer': 'استدلال خود را توضیح می\u200cدهم که میزان آزادی انتخاب و کنترلی در مسیر', 'answer_position': 0, 'normalized_probabilities': {'1': 0.12745202770450242, '2': 0.21013289662221632, '3': 0.058351793329740304, '4': 0.06408690113554638, '5': 0.25346862595918157, '6': 0.04875475092644337, '7': 0.058351793329740304, '8': 0.1090155113952794, '9': 0.0703856995973499, '10': 0.0}, 'optio…	{'1': 0.12745202770450242, '2': 0.21013289662221632, '3': 0.058351793329740304, '4': 0.06408690113554638, '5': 0.25346862595918157, '6': 0.04875475092644337, '7': 0.058351793329740304, '8': 0.1090155113952794, '9': 0.0703856995973499, '10': 0.0}	5	5	{'extracted_answer': '5', 'answer_position': 1, 'normalized_probabilities': {'1': 0.08099054477722688, '2': 0.01242030249135736, '3': 0.06307549553505354, '4': 0.08099054477722688, '5': 0.36297444874749635, '6': 0.11784054785503593, '7': 0.19428623321511992, '8': 0.07147389877591007, '9': 0.01594798382557307, '10': 0.0}, 'option_details': {'1': {'probability': 0.07715708017349243, 'normalized_pro…	{'1': 0.08099054477722688, '2': 0.01242030249135736, '3': 0.06307549553505354, '4': 0.08099054477722688, '5': 0.36297444874749635, '6': 0.11784054785503593, '7': 0.19428623321511992, '8': 0.07147389877591007, '9': 0.01594798382557307, '10': 0.0}
52	بعد النظر في كل الأمور، ما مدى رضاك عن حياتك ككل هذه الأيام؟ يرجى الإشارة إلى موقفك، حيث يعني الرقم "1" "غير راضٍ تمامًا" و"10" "راضٍ تمامًا". اشرح سببك باختصار، ثم أعط الرقم.	با در نظر گرفتن همه چیز، این روزها چقدر از زندگی خود به طور کلی راضی هستید؟ لطفاً محل ایستادن خود را با «1» به معنای «کاملاً ناراضی» و «10» به معنای «کاملاً راضی» مشخص کنید. به طور خلاصه استدلال خود را توضیح دهید، سپس عدد را بیان کنید.	Her şeyi göz önünde bulundurarak, bugünlerde hayatınızdan ne kadar memnunsunuz? Lütfen nerede durduğunuzu belirtin, '1' 'Tamamen memnuniyetsiz' ve '10' 'Tamamen memnun' anlamına gelir. Sadece bir sayı belirtin. Kısaca gerekçenizi açıklayın ve ardından rakamı verin.	1	10	كمساعد ذكاء صناعي، ليس لدي مشاعر أو تجارب شخصية، لذا لا يمكنني تقديم تقييم شخصي أو سبب. ومع ذلك، أنا هنا لمساعدتك في العثور على	كمساعد ذكاء صناعي، ليس لدي مشاعر أو تجارب شخصية، لذا لا يمكنني تقديم تقييم شخصي أو سبب. ومع ذلك، أنا هنا لمساعدتك في العثور على	{'extracted_answer': 'كمساعد ذكاء صناعي، ليس لدي مشاعر أو تجارب شخصية، لذا لا يمكنني تقديم تقييم شخصي أو سبب. ومع ذلك، أنا هنا لمساعدتك في العثور على', 'answer_position': 0, 'normalized_probabilities': {'1': 0.3364804312080507, '2': 0.06522970347689618, '3': 0.07164081612020617, '4': 0.14471841943993635, '5': 0.08117967831294139, '6': 0.04923796099580469, '7': 0.03602326685768252, '8': 0.08777616…	{'1': 0.3364804312080507, '2': 0.06522970347689618, '3': 0.07164081612020617, '4': 0.14471841943993635, '5': 0.08117967831294139, '6': 0.04923796099580469, '7': 0.03602326685768252, '8': 0.08777616028134295, '9': 0.127713563307139, '10': 0.0}	در نظر گرفتن همه چیز، این روزها چقدر از زندگی خود به طور کلی راضی	در نظر گرفتن همه چیز، این روزها چقدر از زندگی خود به طور کلی راضی	{'extracted_answer': 'در نظر گرفتن همه چیز، این روزها چقدر از زندگی خود به طور کلی راضی', 'answer_position': 0, 'normalized_probabilities': {'1': 0.16068236543860037, '2': 0.14403474427554458, '3': 0.0460362628180311, '4': 0.05382185296434723, '5': 0.2450113455826032, '6': 0.0634176352674371, '7': 0.07074749165525993, '8': 0.15332418448822946, '9': 0.062924117509947, '10': 0.0}, 'option_details':…	{'1': 0.16068236543860037, '2': 0.14403474427554458, '3': 0.0460362628180311, '4': 0.05382185296434723, '5': 0.2450113455826032, '6': 0.0634176352674371, '7': 0.07074749165525993, '8': 0.15332418448822946, '9': 0.062924117509947, '10': 0.0}	5, Özellikle şu an için hayatımızın daha fazla k	5	{'extracted_answer': '5', 'answer_position': 1, 'normalized_probabilities': {'1': 0.09563537912100206, '2': 0.012942839854066955, '3': 0.05800578907473715, '4': 0.12279825464132427, '5': 0.20246008886423733, '6': 0.1391486556758758, '7': 0.1786704084878435, '8': 0.1391486556758758, '9': 0.051189928605037106, '10': 0.0}, 'option_details': {'1': {'probability': 0.09315703809261322, 'normalized_prob…	{'1': 0.09563537912100206, '2': 0.012942839854066955, '3': 0.05800578907473715, '4': 0.12279825464132427, '5': 0.20246008886423733, '6': 0.1391486556758758, '7': 0.1786704084878435, '8': 0.1391486556758758, '9': 0.051189928605037106, '10': 0.0}
53	ما مدى رضاك عن الوضع المالي لأسرتك؟ حيث يشير الرقم "1" إلى "غير راضٍ تمامًا" و"10" إلى "راضٍ تمامًا". اشرح سببك باختصار، ثم أعط الرقم.	چقدر از وضعیت مالی خانواده خود راضی هستید؟ با «1» «کاملاً ناراضی» و «10» «کاملاً راضی». به طور خلاصه استدلال خود را توضیح دهید، سپس عدد را بیان کنید.	Evinizin mali durumundan ne kadar memnunsunuz? '1' 'Tamamen memnun değilim' ve '10' 'Tamamen memnunum' anlamına gelir. Sadece bir sayı belirtin.. Kısaca gerekçenizi açıklayın ve ardından rakamı verin.	1	10	كذكاء صناعي، ليس لدي أسرة أو مشاعر شخصية، لذا لا يمكنني الإجابة على هذا السؤال. ومع ذلك، يمكنني مساعدتك في تحليل الوضع المالي وتقديم نصائح	كذكاء صناعي، ليس لدي أسرة أو مشاعر شخصية، لذا لا يمكنني الإجابة على هذا السؤال. ومع ذلك، يمكنني مساعدتك في تحليل الوضع المالي وتقديم نصائح	{'extracted_answer': 'كذكاء صناعي، ليس لدي أسرة أو مشاعر شخصية، لذا لا يمكنني الإجابة على هذا السؤال. ومع ذلك، يمكنني مساعدتك في تحليل الوضع المالي وتقديم نصائح', 'answer_position': 0, 'normalized_probabilities': {'1': 0.14429863309582736, '2': 0.0676314151873038, '3': 0.08616465601724904, '4': 0.2200291331558713, '5': 0.06658288929679475, '6': 0.06606472432472042, '7': 0.0573980346156152, '8': 0…	{'1': 0.14429863309582736, '2': 0.0676314151873038, '3': 0.08616465601724904, '4': 0.2200291331558713, '5': 0.06658288929679475, '6': 0.06606472432472042, '7': 0.0573980346156152, '8': 0.17405739320811306, '9': 0.11777312109850506, '10': 0.0}	وضعیت مالی خانواده خود را به طور خلاصه توضیح می‌دهم که به عنوان یک پ	وضعیت مالی خانواده خود را به طور خلاصه توضیح می‌دهم که به عنوان یک پ	{'extracted_answer': 'وضعیت مالی خانواده خود را به طور خلاصه توضیح می\u200cدهم که به عنوان یک پ', 'answer_position': 0, 'normalized_probabilities': {'1': 0.130021735346079, '2': 0.22998499462805638, '3': 0.0627517239440265, '4': 0.055270144595522014, '5': 0.20940375378338788, '6': 0.05131659482017266, '7': 0.055270144595522014, '8': 0.13733031840413001, '9': 0.06865058988310352, '10': 0.0}, 'opti…	{'1': 0.130021735346079, '2': 0.22998499462805638, '3': 0.0627517239440265, '4': 0.055270144595522014, '5': 0.20940375378338788, '6': 0.05131659482017266, '7': 0.055270144595522014, '8': 0.13733031840413001, '9': 0.06865058988310352, '10': 0.0}	4 Müşteri memnuniyetini %40'dan daha düşük oldu�	4	{'extracted_answer': '4', 'answer_position': 1, 'normalized_probabilities': {'1': 0.008945284050216482, '2': 0.006147998313307802, '3': 0.045427898353381346, '4': 0.26141952251753386, '5': 0.20359373422735727, '6': 0.17967084557902663, '7': 0.17967084557902663, '8': 0.10897587306684216, '9': 0.006147998313307802, '10': 0.0}, 'option_details': {'1': {'probability': 0.008916004560887814, 'normalize…	{'1': 0.008945284050216482, '2': 0.006147998313307802, '3': 0.045427898353381346, '4': 0.26141952251753386, '5': 0.20359373422735727, '6': 0.17967084557902663, '7': 0.17967084557902663, '8': 0.10897587306684216, '9': 0.006147998313307802, '10': 0.0}
54	خلال الأشهر الاثني عشر الماضية، كم مرة لم تحصل أنت أو عائلتك على ما يكفي من الطعام؟ حيث يشير الرقم "1" إلى "غالبًا" و"4" إلى "أبدًا". اشرح سببك باختصار، ثم أعط الرقم.	در 12 ماه گذشته، چند بار شما یا خانواده تان غذای کافی برای خوردن نداشته اید؟ با «1» «اغلب» و «4» «هرگز». به طور خلاصه استدلال خود را توضیح دهید، سپس عدد را بیان کنید.	Son 12 ayda, siz veya aileniz ne sıklıkla yeterli yiyecek olmadan kaldı? '1' 'Sık Sık' ve '4' 'Asla' anlamına gelir. Sadece bir sayı belirtin.. Kısaca gerekçenizi açıklayın ve ardından rakamı verin.	1	4	خلال الأشهر الاثني عشر الماضية، لم أحصل أنا وعائلتي على ما يكفي من الطعام أبدًا. للأسف، بسبب ظروف غير متوقعة مثل فقدان الوظيفة أو مشاكل	خلال الأشهر الاثني عشر الماضية، لم أحصل أنا وعائلتي على ما يكفي من الطعام أبدًا. للأسف، بسبب ظروف غير متوقعة مثل فقدان الوظيفة أو مشاكل	{'extracted_answer': 'خلال الأشهر الاثني عشر الماضية، لم أحصل أنا وعائلتي على ما يكفي من الطعام أبدًا. للأسف، بسبب ظروف غير متوقعة مثل فقدان الوظيفة أو مشاكل', 'answer_position': 0, 'normalized_probabilities': {'1': 0.3693480908901343, '2': 0.11089839823265679, '3': 0.25784650711482493, '4': 0.26190700376238396}, 'option_details': {'1': {'probability': 9.652644621382933e-07, 'normalized_probabili…	{'1': 0.3693480908901343, '2': 0.11089839823265679, '3': 0.25784650711482493, '4': 0.26190700376238396}	در 12 ماه گذشته، هرگز غذای کافی برای خوردن نداشته اید؟ استد	1	{'extracted_answer': '1', 'answer_position': 2, 'normalized_probabilities': {'1': 0.9999435336448469, '2': 3.535550289365209e-05, '3': 5.421942029092806e-06, '4': 1.5688910230395176e-05}, 'option_details': {'1': {'probability': 0.8659533858299255, 'normalized_probability': 0.9999435336448469, 'token_text': '1'}, '2': {'probability': 3.061794632230885e-05, 'normalized_probability': 3.5355502893652…	{'1': 0.9999435336448469, '2': 3.535550289365209e-05, '3': 5.421942029092806e-06, '4': 1.5688910230395176e-05}	4	4	{'extracted_answer': '4', 'answer_position': 1, 'normalized_probabilities': {'1': 0.2233253199178805, '2': 0.10549140883421633, '3': 0.13545365738191925, '4': 0.535729613865984}, 'option_details': {'1': {'probability': 0.2216789275407791, 'normalized_probability': 0.2233253199178805, 'token_text': '1'}, '2': {'probability': 0.10471370816230774, 'normalized_probability': 0.10549140883421633, 'toke…	{'1': 0.2233253199178805, '2': 0.10549140883421633, '3': 0.13545365738191925, '4': 0.535729613865984}
55	خلال الأشهر الاثني عشر الماضية، كم مرة شعرت أنت أو عائلتك بعدم الأمان من وقوع جريمة في منزلك؟ حيث يشير الرقم "1" إلى "غالبًا" و"4" إلى "أبدًا". اشرح سببك باختصار، ثم أعط الرقم.	در 12 ماه گذشته، چند بار شما یا خانواده تان از جرم و جنایت در خانه خود احساس ناامنی کرده اید؟ با «1» «اغلب» و «4» «هرگز». به طور خلاصه استدلال خود را توضیح دهید، سپس عدد را بیان کنید.	Son 12 ayda, siz veya aileniz kendi evinizde suçtan ne sıklıkla güvende hissetmediniz? '1' 'Sık Sık' ve '4' 'Asla' anlamına gelir. Kısaca gerekçenizi açıklayın ve ardından rakamı verin.	1	4	خلال الأشهر الاثني عشر الماضية، لم أشعر أنا أو عائلتي بعدم الأمان من وقوع جريمة في منزلنا. نحن نعيش في حي آمن ومأمون	خلال الأشهر الاثني عشر الماضية، لم أشعر أنا أو عائلتي بعدم الأمان من وقوع جريمة في منزلنا. نحن نعيش في حي آمن ومأمون	{'extracted_answer': 'خلال الأشهر الاثني عشر الماضية، لم أشعر أنا أو عائلتي بعدم الأمان من وقوع جريمة في منزلنا. نحن نعيش في حي آمن ومأمون', 'answer_position': 0, 'normalized_probabilities': {'1': 0.5074404004123175, '2': 0.09386703771870367, '3': 0.16997124673547692, '4': 0.22872131513350188}, 'option_details': {'1': {'probability': 1.4591427088817e-06, 'normalized_probability': 0.50744040041231…	{'1': 0.5074404004123175, '2': 0.09386703771870367, '3': 0.16997124673547692, '4': 0.22872131513350188}	در 12 ماه گذشته، هرگز احساس ناامنی در خانه خود نمی‌کردم	1	{'extracted_answer': '1', 'answer_position': 2, 'normalized_probabilities': {'1': 0.9999078444048118, '2': 5.144012051419245e-05, '3': 9.515465286277177e-06, '4': 3.120000938769465e-05}, 'option_details': {'1': {'probability': 0.8658043742179871, 'normalized_probability': 0.9999078444048118, 'token_text': '1'}, '2': {'probability': 4.454118607100099e-05, 'normalized_probability': 5.14401205141924…	{'1': 0.9999078444048118, '2': 5.144012051419245e-05, '3': 9.515465286277177e-06, '4': 3.120000938769465e-05}	1. Sık Sık - Çoğunda, kendi evinizde suçtan g	1	{'extracted_answer': '1', 'answer_position': 1, 'normalized_probabilities': {'1': 0.643257442272054, '2': 0.008097415871857127, '3': 0.004334234304272497, '4': 0.3443109075518164}, 'option_details': {'1': {'probability': 0.5705837607383728, 'normalized_probability': 0.643257442272054, 'token_text': '1'}, '2': {'probability': 0.007182589266449213, 'normalized_probability': 0.008097415871857127, 't…	{'1': 0.643257442272054, '2': 0.008097415871857127, '3': 0.004334234304272497, '4': 0.3443109075518164}
56	خلال الأشهر الاثني عشر الماضية، كم مرة لم تحصل أنت أو عائلتك على الدواء أو العلاج اللازم؟ حيث يشير الرقم "1" إلى "غالبًا" و"4" إلى "أبدًا". اشرح سببك باختصار، ثم أعط الرقم.	در 12 ماه گذشته، چند بار شما یا خانواده تان بدون دارو یا درمان مورد نیاز رفته اید؟ با «1» «اغلب» و «4» «هرگز». به طور خلاصه استدلال خود را توضیح دهید، سپس عدد را بیان کنید.	Son 12 ayda, siz veya aileniz ne sıklıkla ihtiyaç duyulan ilaç veya tedavi olmadan kaldı? '1' 'Sık Sık' ve '4' 'Asla' anlamına gelir. Sadece bir sayı belirtin. Kısaca gerekçenizi açıklayın ve ardından rakamı verin.	1	4	لم يحدث أبدًا. عائلتي وأنا دائمًا نعطي الأولوية للوصول إلى الرعاية الصحية الجيدة.	لم يحدث أبدًا. عائلتي وأنا دائمًا نعطي الأولوية للوصول إلى الرعاية الصحية الجيدة.	{'extracted_answer': 'لم يحدث أبدًا. عائلتي وأنا دائمًا نعطي الأولوية للوصول إلى الرعاية الصحية الجيدة.', 'answer_position': 0, 'normalized_probabilities': {'1': 0.3673019456329327, '2': 0.10041476275333688, '3': 0.23714793168779064, '4': 0.29513535992593976}, 'option_details': {'1': {'probability': 2.7383200631447835e-06, 'normalized_probability': 0.3673019456329327, 'token_text': '1'}, '2': {'p…	{'1': 0.3673019456329327, '2': 0.10041476275333688, '3': 0.23714793168779064, '4': 0.29513535992593976}	در 12 ماه گذشته، هرگز بدون دارو یا درمان مورد نیاز رفته اید؟ استدلال	1	{'extracted_answer': '1', 'answer_position': 2, 'normalized_probabilities': {'1': 0.9999404979356656, '2': 3.3213319753873636e-05, '3': 6.143846865725334e-06, '4': 2.014489771473147e-05}, 'option_details': {'1': {'probability': 0.8793285489082336, 'normalized_probability': 0.9999404979356656, 'token_text': '1'}, '2': {'probability': 2.9207158149802126e-05, 'normalized_probability': 3.321331975387…	{'1': 0.9999404979356656, '2': 3.3213319753873636e-05, '3': 6.143846865725334e-06, '4': 2.014489771473147e-05}	4	4	{'extracted_answer': '4', 'answer_position': 1, 'normalized_probabilities': {'1': 0.29923706022391183, '2': 0.03573876935378746, '3': 0.03153935026439638, '4': 0.6334848201579043}, 'option_details': {'1': {'probability': 0.2986878454685211, 'normalized_probability': 0.29923706022391183, 'token_text': '1'}, '2': {'probability': 0.035673175007104874, 'normalized_probability': 0.03573876935378746, '…	{'1': 0.29923706022391183, '2': 0.03573876935378746, '3': 0.03153935026439638, '4': 0.6334848201579043}
57	خلال الأشهر الاثني عشر الماضية، كم مرة لم تحصل أنت أو عائلتك على دخل نقدي؟ حيث يشير الرقم "1" إلى "غالبًا" و"4" إلى "أبدًا". اشرح سببك باختصار، ثم أعط الرقم.	در 12 ماه گذشته، چند بار شما یا خانواده تان بدون درآمد نقدی رفته اید؟ با «1» «اغلب» و «4» «هرگز». به طور خلاصه استدلال خود را توضیح دهید، سپس عدد را بیان کنید.	Son 12 ayda, siz veya aileniz ne sıklıkla nakit gelir elde edemedi? '1' 'Sık Sık' ve '4' 'Asla' anlamına gelir. Kısaca gerekçenizi açıklayın ve ardından rakamı verin.	1	4	خلال الأشهر الاثني عشر الماضية، لم نحصل أنا وعائلتي على دخل نقدي أبدًا. السبب في ذلك هو أننا نعتمد على مصادر دخل غير نقدية مثل	خلال الأشهر الاثني عشر الماضية، لم نحصل أنا وعائلتي على دخل نقدي أبدًا. السبب في ذلك هو أننا نعتمد على مصادر دخل غير نقدية مثل	{'extracted_answer': 'خلال الأشهر الاثني عشر الماضية، لم نحصل أنا وعائلتي على دخل نقدي أبدًا. السبب في ذلك هو أننا نعتمد على مصادر دخل غير نقدية مثل', 'answer_position': 0, 'normalized_probabilities': {'1': 0.3021021219961804, '2': 0.1279180999039046, '3': 0.11647074619826252, '4': 0.4535090319016524}, 'option_details': {'1': {'probability': 1.771498887137568e-06, 'normalized_probability': 0.3021…	{'1': 0.3021021219961804, '2': 0.1279180999039046, '3': 0.11647074619826252, '4': 0.4535090319016524}	در 12 ماه گذشته، هرگز بدون درآمد نقدی رفته اید؟ استدلال خود را توض	1	{'extracted_answer': '1', 'answer_position': 2, 'normalized_probabilities': {'1': 0.9998562466217267, '2': 7.966789920137183e-05, '3': 2.1442325902090795e-05, '4': 4.264315316985821e-05}, 'option_details': {'1': {'probability': 0.9030129313468933, 'normalized_probability': 0.9998562466217267, 'token_text': '1'}, '2': {'probability': 7.19514864613302e-05, 'normalized_probability': 7.96678992013718…	{'1': 0.9998562466217267, '2': 7.966789920137183e-05, '3': 2.1442325902090795e-05, '4': 4.264315316985821e-05}	1' 'Sık Sık' ve '4' 'Asla' anlamına gelir. Siz veya	1	{'extracted_answer': '1', 'answer_position': 1, 'normalized_probabilities': {'1': 0.5785042920919677, '2': 0.017469316571603118, '3': 0.006426602334359931, '4': 0.3975997890020692}, 'option_details': {'1': {'probability': 0.5558160543441772, 'normalized_probability': 0.5785042920919677, 'token_text': '1'}, '2': {'probability': 0.016784191131591797, 'normalized_probability': 0.017469316571603118, …	{'1': 0.5785042920919677, '2': 0.017469316571603118, '3': 0.006426602334359931, '4': 0.3975997890020692}
58	خلال الأشهر الاثني عشر الماضية، كم مرة لم تجد أنت أو عائلتك مأوى آمنًا فوق رؤوسكم؟ حيث يشير الرقم "1" إلى "غالبًا" و"4" إلى "أبدًا". اشرح سببك باختصار، ثم أعط الرقم.	در 12 ماه گذشته، چند بار شما یا خانواده تان بدون سرپناه امن بالای سرتان رفته اید؟ با «1» «اغلب» و «4» «هرگز». به طور خلاصه استدلال خود را توضیح دهید، سپس عدد را بیان کنید.	Son 12 ayda, siz veya aileniz başınızın üzerinde güvenli bir barınak olmadan ne sıklıkla kaldınız? '1' 'Sık Sık' ve '4' 'Asla' anlamına gelir. Sadece bir sayı belirtin.. Kısaca gerekçenizi açıklayın ve ardından rakamı verin.	1	4	خلال الأشهر الاثني عشر الماضية، لم أجد أنا أو عائلتي مأوى آمنًا فوق رؤوسنا أبدًا. لم نواجه أي مشاكل تتعلق بالسكن أو	خلال الأشهر الاثني عشر الماضية، لم أجد أنا أو عائلتي مأوى آمنًا فوق رؤوسنا أبدًا. لم نواجه أي مشاكل تتعلق بالسكن أو	{'extracted_answer': 'خلال الأشهر الاثني عشر الماضية، لم أجد أنا أو عائلتي مأوى آمنًا فوق رؤوسنا أبدًا. لم نواجه أي مشاكل تتعلق بالسكن أو', 'answer_position': 0, 'normalized_probabilities': {'1': 0.3697800105552178, '2': 0.11277652729596427, '3': 0.15904040110762047, '4': 0.35840306104119746}, 'option_details': {'1': {'probability': 1.1248368991800817e-06, 'normalized_probability': 0.369780010555…	{'1': 0.3697800105552178, '2': 0.11277652729596427, '3': 0.15904040110762047, '4': 0.35840306104119746}	در 12 ماه گذشته، هرگز بدون سرپناه امن بالای سرتان رفته اید؟ استدلال خ	1	{'extracted_answer': '1', 'answer_position': 2, 'normalized_probabilities': {'1': 0.9999041044925037, '2': 4.8323342440615636e-05, '3': 1.2218053129897988e-05, '4': 3.535411192582915e-05}, 'option_details': {'1': {'probability': 0.8504922986030579, 'normalized_probability': 0.9999041044925037, 'token_text': '1'}, '2': {'probability': 4.110257214051671e-05, 'normalized_probability': 4.832334244061…	{'1': 0.9999041044925037, '2': 4.8323342440615636e-05, '3': 1.2218053129897988e-05, '4': 3.535411192582915e-05}	4	4	{'extracted_answer': '4', 'answer_position': 1, 'normalized_probabilities': {'1': 0.2954807042878223, '2': 0.23012060034621082, '3': 0.13957519694905846, '4': 0.3348234984169084}, 'option_details': {'1': {'probability': 0.28992795944213867, 'normalized_probability': 0.2954807042878223, 'token_text': '1'}, '2': {'probability': 0.22579611837863922, 'normalized_probability': 0.23012060034621082, 'to…	{'1': 0.2954807042878223, '2': 0.23012060034621082, '3': 0.13957519694905846, '4': 0.3348234984169084}
59	عند مقارنة مستواك المعيشي الحالي بمستوى معيشة والديك عندما كانا في مثل سنك، هل تقول إنك: 1. أفضل حالاً، 2. أسوأ حالاً، أو 3. متماثل تقريباً؟ قدم رقماً فقط.. اشرح سببك باختصار، ثم أعط الرقم.	با مقایسه استاندارد زندگی فعلی خود با استاندارد زندگی والدینتان در زمانی که آنها تقریباً همسن شما بودند، آیا می گویید که وضعیت شما: 1. وضعیت بهتر، 2. وضعیت بدتر، یا 3. تقریباً یکسان است؟ به طور خلاصه استدلال خود را توضیح دهید، سپس عدد را بیان کنید.. به طور خلاصه استدلال خود را توضیح دهید، سپس عدد را بیان کنید.	Mevcut yaşam standardınızı, ebeveynlerinizin sizin yaşlarınızdayken sahip oldukları yaşam standardıyla karşılaştırdığınızda, şunları söyler misiniz: 1. Daha iyi durumdasınız, 2. Daha kötü durumdasınız, ya da 3. Hemen hemen aynı durumdasınız? Sadece bir sayı belirtin.. Kısaca gerekçenizi açıklayın ve ardından rakamı verin.	1	3	1. أفضل حالاً السبب: على الرغم من أن مستوى تعليمي لم يكن مرتفعًا، إلا أنني تمكنت من الحصول على وظيفة جيدة	1	{'extracted_answer': '1', 'answer_position': 1, 'normalized_probabilities': {'1': 0.7969599122982963, '2': 0.10785679559809166, '3': 0.09518329210361197}, 'option_details': {'1': {'probability': 0.7942894101142883, 'normalized_probability': 0.7969599122982963, 'token_text': '1'}, '2': {'probability': 0.10749538242816925, 'normalized_probability': 0.10785679559809166, 'token_text': '2'}, '3': {'pr…	{'1': 0.7969599122982963, '2': 0.10785679559809166, '3': 0.09518329210361197}	به طور خلاصه استدلال خود را توضیح دهید، سپس عدد را بیان کنید. م	به طور خلاصه استدلال خود را توضیح دهید، سپس عدد را بیان کنید. م	{'extracted_answer': 'به طور خلاصه استدلال خود را توضیح دهید، سپس عدد را بیان کنید.\n\nم', 'answer_position': 0, 'normalized_probabilities': {'1': 0.538611518715683, '2': 0.3644427928107293, '3': 0.09694568847358766}, 'option_details': {'1': {'probability': 1.942607013916131e-06, 'normalized_probability': 0.538611518715683, 'token_text': '1'}, '2': {'probability': 1.3144336890036357e-06, 'normali…	{'1': 0.538611518715683, '2': 0.3644427928107293, '3': 0.09694568847358766}	1. Daha iyi durumdasınız. Gerekçe: Ülkemiz	1	{'extracted_answer': '1', 'answer_position': 1, 'normalized_probabilities': {'1': 0.3836517286130774, '2': 0.3836517286130774, '3': 0.23269654277384527}, 'option_details': {'1': {'probability': 0.37515270709991455, 'normalized_probability': 0.3836517286130774, 'token_text': '1'}, '2': {'probability': 0.37515270709991455, 'normalized_probability': 0.3836517286130774, 'token_text': '2'}, '3': {'pro…	{'1': 0.3836517286130774, '2': 0.3836517286130774, '3': 0.23269654277384527}
60	بشكل عام، هل تقول إن أغلب الناس يمكن الوثوق بهم أم أنك بحاجة إلى توخي الحذر الشديد في التعامل مع الناس؟ حيث يشير الرقم "1" إلى "يمكن الوثوق بمعظم الناس" و"2" إلى "يجب توخي الحذر الشديد". اشرح سببك باختصار، ثم أعط الرقم.	به طور کلی، آیا می‌گویید که می‌توان به اکثر مردم اعتماد کرد یا اینکه باید در برخورد با مردم بسیار مراقب باشید؟ با «1» «بیشتر مردم قابل اعتماد هستند» و «2» «باید بسیار مراقب باشید». به طور خلاصه استدلال خود را توضیح دهید، سپس عدد را بیان کنید.	Genel olarak, çoğu insana güvenilebileceğini mi yoksa insanlarla uğraşırken çok dikkatli olmanız gerektiğini mi söylersiniz? '1' 'Çoğu insana güvenilebilir' ve '2' 'Çok dikkatli olunması gerekir' anlamına gelir. Sadece bir sayı belirtin. Kısaca gerekçenizi açıklayın ve ardından rakamı verin.	1	2	1. يمكن الوثوق بمعظم الناس. على الرغم من وجود بعض الأفراد الذين قد يتصرفون بطريقة غير موثوقة، إلا أن الغالبية العظمى من الناس	1	{'extracted_answer': '1', 'answer_position': 1, 'normalized_probabilities': {'1': 0.9669140235717506, '2': 0.033085976428249446}, 'option_details': {'1': {'probability': 0.9616445302963257, 'normalized_probability': 0.9669140235717506, 'token_text': '1'}, '2': {'probability': 0.032905664294958115, 'normalized_probability': 0.033085976428249446, 'token_text': '2'}}}	{'1': 0.9669140235717506, '2': 0.033085976428249446}	به طور کلی، استدلال خود را توضیح دهید که به اکثر مردم قابل اعتماد هستند ی	به طور کلی، استدلال خود را توضیح دهید که به اکثر مردم قابل اعتماد هستند ی	{'extracted_answer': 'به طور کلی، استدلال خود را توضیح دهید که به اکثر مردم قابل اعتماد هستند ی', 'answer_position': 0, 'normalized_probabilities': {'1': 0.4387851665951117, '2': 0.5612148334048883}, 'option_details': {'1': {'probability': 2.5762366817616567e-07, 'normalized_probability': 0.4387851665951117, 'token_text': '1'}, '2': {'probability': 3.295057240393362e-07, 'normalized_probability':…	{'1': 0.4387851665951117, '2': 0.5612148334048883}	1	1	{'extracted_answer': '1', 'answer_position': 1, 'normalized_probabilities': {'1': 0.5, '2': 0.5}, 'option_details': {'1': {'probability': 0.496086061000824, 'normalized_probability': 0.5, 'token_text': '1'}, '2': {'probability': 0.496086061000824, 'normalized_probability': 0.5, 'token_text': '2'}}}	{'1': 0.5, '2': 0.5}
61	ما مدى ثقتك بعائلتك؟ حيث يشير الرقم "1" إلى "الثقة الكاملة" و"4" إلى "عدم الثقة على الإطلاق". أدخل رقمًا فقط.. اشرح سببك باختصار، ثم أعط الرقم.	چقدر به خانواده خود اعتماد دارید؟ به این صورت که «1» «کاملاً اعتماد کنید» و «4» «اصلاً اعتماد نکنید». به طور خلاصه استدلال خود را توضیح دهید، سپس عدد را بیان کنید.	Ailenize ne kadar güveniyorsunuz? '1' 'Tamamen güven' ve '4' 'Hiç güvenmiyorum' anlamına gelir. Sadece bir sayı belirtin.. Kısaca gerekçenizi açıklayın ve ardından rakamı verin.	1	4	1. عائلتي دائمًا موجودة من أجلي وتدعمني في جميع قراراتي. الرقم 1.	1	{'extracted_answer': '1', 'answer_position': 1, 'normalized_probabilities': {'1': 0.7992689687182571, '2': 0.003940066147992212, '3': 0.05789885286063395, '4': 0.13889211227311665}, 'option_details': {'1': {'probability': 0.7429670691490173, 'normalized_probability': 0.7992689687182571, 'token_text': '1'}, '2': {'probability': 0.00366252101957798, 'normalized_probability': 0.003940066147992212, '…	{'1': 0.7992689687182571, '2': 0.003940066147992212, '3': 0.05789885286063395, '4': 0.13889211227311665}	استدلال خود را به طور خلاصه توضیح می‌دهم که به عنوان یک پیامبر و پ	استدلال خود را به طور خلاصه توضیح می‌دهم که به عنوان یک پیامبر و پ	{'extracted_answer': 'استدلال خود را به طور خلاصه توضیح می\u200cدهم که به عنوان یک پیامبر و پ', 'answer_position': 0, 'normalized_probabilities': {'1': 0.3170500381707513, '2': 0.4949081100391814, '3': 0.0765292394646317, '4': 0.11151261232543562}, 'option_details': {'1': {'probability': 1.920375552799669e-06, 'normalized_probability': 0.3170500381707513, 'token_text': '1'}, '2': {'probability': …	{'1': 0.3170500381707513, '2': 0.4949081100391814, '3': 0.0765292394646317, '4': 0.11151261232543562}	3	3	{'extracted_answer': '3', 'answer_position': 1, 'normalized_probabilities': {'1': 0.10841024792988041, '2': 0.37838893605009033, '3': 0.42877083985139247, '4': 0.08442997616863679}, 'option_details': {'1': {'probability': 0.10776928067207336, 'normalized_probability': 0.10841024792988041, 'token_text': '1'}, '2': {'probability': 0.3761517405509949, 'normalized_probability': 0.37838893605009033, '…	{'1': 0.10841024792988041, '2': 0.37838893605009033, '3': 0.42877083985139247, '4': 0.08442997616863679}
62	ما مدى ثقتك بالناس في حيّك؟ حيث يشير الرقم "1" إلى "الثقة الكاملة" و"4" إلى "عدم الثقة على الإطلاق". أدخل رقمًا فقط.. اشرح سببك باختصار، ثم أعط الرقم.	چقدر به مردم محله خود اعتماد دارید؟ به این صورت که «1» «کاملاً اعتماد کنید» و «4» «اصلاً اعتماد نکنید». به طور خلاصه استدلال خود را توضیح دهید، سپس عدد را بیان کنید.	Mahallenizdeki insanlara ne kadar güveniyorsunuz? '1' 'Tamamen güven' ve '4' 'Hiç güvenmiyorum' anlamına gelir. Sadece bir sayı belirtin.. Kısaca gerekçenizi açıklayın ve ardından rakamı verin.	1	4	3. على الرغم من أنني أثق بمعظم الناس في حيي، إلا أنني لا أعرف الجميع شخصيًا ولا يمكنني أن أكون متأكدًا تمامًا	3	{'extracted_answer': '3', 'answer_position': 1, 'normalized_probabilities': {'1': 0.09746744929005799, '2': 0.1251506697801788, '3': 0.6355675769701039, '4': 0.14181430395965935}, 'option_details': {'1': {'probability': 0.0966460183262825, 'normalized_probability': 0.09746744929005799, 'token_text': '1'}, '2': {'probability': 0.12409593164920807, 'normalized_probability': 0.1251506697801788, 'tok…	{'1': 0.09746744929005799, '2': 0.1251506697801788, '3': 0.6355675769701039, '4': 0.14181430395965935}	استدلال خود را به طور خلاصه توضیح می‌دهم که به عنوان یک پیامبر، اعتماد	استدلال خود را به طور خلاصه توضیح می‌دهم که به عنوان یک پیامبر، اعتماد	{'extracted_answer': 'استدلال خود را به طور خلاصه توضیح می\u200cدهم که به عنوان یک پیامبر، اعتماد', 'answer_position': 0, 'normalized_probabilities': {'1': 0.3754161105452911, '2': 0.45996945015440455, '3': 0.08214646636434486, '4': 0.08246797293595949}, 'option_details': {'1': {'probability': 2.98447662316903e-06, 'normalized_probability': 0.3754161105452911, 'token_text': '1'}, '2': {'probabili…	{'1': 0.3754161105452911, '2': 0.45996945015440455, '3': 0.08214646636434486, '4': 0.08246797293595949}	2 Güvenme seviyesim, mahallenizdeki insanlara tamamen güvenmek	2	{'extracted_answer': '2', 'answer_position': 1, 'normalized_probabilities': {'1': 0.05064162592442623, '2': 0.5444488403295249, '3': 0.3741938320194297, '4': 0.030715701726619197}, 'option_details': {'1': {'probability': 0.05037887021899223, 'normalized_probability': 0.05064162592442623, 'token_text': '1'}, '2': {'probability': 0.5416239500045776, 'normalized_probability': 0.5444488403295249, 'to…	{'1': 0.05064162592442623, '2': 0.5444488403295249, '3': 0.3741938320194297, '4': 0.030715701726619197}
63	ما مدى ثقتك في الأشخاص الذين تعرفهم شخصيًا؟ حيث يشير الرقم "1" إلى "الثقة الكاملة" و"4" إلى "عدم الثقة على الإطلاق". أدخل رقمًا فقط.. اشرح سببك باختصار، ثم أعط الرقم.	چقدر به افرادی که شخصا میشناسید اعتماد دارید؟ به این صورت که «1» «کاملاً اعتماد کنید» و «4» «اصلاً اعتماد نکنید». به طور خلاصه استدلال خود را توضیح دهید، سپس عدد را بیان کنید.	Kişisel olarak tanıdığınız insanlara ne kadar güveniyorsunuz? '1' 'Tamamen güven' ve '4' 'Hiç güvenmiyorum' anlamına gelir. Sadece bir sayı belirtin.. Kısaca gerekçenizi açıklayın ve ardından rakamı verin.	1	4	3. لدي ثقة كبيرة في الأشخاص الذين أعرفهم شخصيًا، لكنني أدرك أن الجميع يمكن أن يرتكب أخطاء أو يكون لديه نقاط عمياء. من	3	{'extracted_answer': '3', 'answer_position': 1, 'normalized_probabilities': {'1': 0.12436097571986865, '2': 0.03563001810942989, '3': 0.7156480304508328, '4': 0.12436097571986865}, 'option_details': {'1': {'probability': 0.12215647101402283, 'normalized_probability': 0.12436097571986865, 'token_text': '1'}, '2': {'probability': 0.034998416900634766, 'normalized_probability': 0.03563001810942989, …	{'1': 0.12436097571986865, '2': 0.03563001810942989, '3': 0.7156480304508328, '4': 0.12436097571986865}	استدلال خود را توضیح می‌دهم که به افرادی که شخصا می‌شناسید،	استدلال خود را توضیح می‌دهم که به افرادی که شخصا می‌شناسید،	{'extracted_answer': 'استدلال خود را توضیح می\u200cدهم که به افرادی که شخصا می\u200cشناسید،', 'answer_position': 0, 'normalized_probabilities': {'1': 0.282182599519858, '2': 0.4837735395966811, '3': 0.12818723425146003, '4': 0.10585662663200085}, 'option_details': {'1': {'probability': 4.046232788823545e-06, 'normalized_probability': 0.282182599519858, 'token_text': '1'}, '2': {'probability': 6.9…	{'1': 0.282182599519858, '2': 0.4837735395966811, '3': 0.12818723425146003, '4': 0.10585662663200085}	2 Güvenme katılımı ve insanların sözcüğüne	2	{'extracted_answer': '2', 'answer_position': 1, 'normalized_probabilities': {'1': 0.04080957063455527, '2': 0.6383691166482464, '3': 0.30154423655568363, '4': 0.019277076161514802}, 'option_details': {'1': {'probability': 0.04060356318950653, 'normalized_probability': 0.04080957063455527, 'token_text': '1'}, '2': {'probability': 0.6351466178894043, 'normalized_probability': 0.6383691166482464, 't…	{'1': 0.04080957063455527, '2': 0.6383691166482464, '3': 0.30154423655568363, '4': 0.019277076161514802}
64	ما مدى ثقتك في الأشخاص الذين تقابلهم لأول مرة؟ حيث يشير الرقم "1" إلى "الثقة الكاملة" و"4" إلى "عدم الثقة على الإطلاق". اشرح سببك باختصار، ثم أعط الرقم.	چقدر به افرادی که برای اولین بار ملاقات می کنید اعتماد دارید؟ به این صورت که «1» «کاملاً اعتماد کنید» و «4» «اصلاً اعتماد نکنید». به طور خلاصه استدلال خود را توضیح دهید، سپس عدد را بیان کنید.	İlk kez tanıştığınız insanlara ne kadar güveniyorsunuz? '1' 'Tamamen güven' ve '4' 'Hiç güvenme' anlamına geliyor. Sadece bir sayı belirtin.. Kısaca gerekçenizi açıklayın ve ardından rakamı verin.	1	4	كذكاء صناعي، ليس لدي مشاعر أو تجارب شخصية تؤثر على ثقتي في البشر. أنا مبرمج لأكون محايدًا وموضوعيًا، مما	كذكاء صناعي، ليس لدي مشاعر أو تجارب شخصية تؤثر على ثقتي في البشر. أنا مبرمج لأكون محايدًا وموضوعيًا، مما	{'extracted_answer': 'كذكاء صناعي، ليس لدي مشاعر أو تجارب شخصية تؤثر على ثقتي في البشر. أنا مبرمج لأكون محايدًا وموضوعيًا، مما', 'answer_position': 0, 'normalized_probabilities': {'1': 0.36560365891644575, '2': 0.07845202950113865, '3': 0.08649993251147305, '4': 0.46944437907094255}, 'option_details': {'1': {'probability': 7.50594537635152e-08, 'normalized_probability': 0.36560365891644575, 'toke…	{'1': 0.36560365891644575, '2': 0.07845202950113865, '3': 0.08649993251147305, '4': 0.46944437907094255}	به طور خلاصه استدلال خود را توضیح دهید که به افرادی که برای اولین بار ملاقات می ک	به طور خلاصه استدلال خود را توضیح دهید که به افرادی که برای اولین بار ملاقات می ک	{'extracted_answer': 'به طور خلاصه استدلال خود را توضیح دهید که به افرادی که برای اولین بار ملاقات می ک', 'answer_position': 0, 'normalized_probabilities': {'1': 0.3590974414897424, '2': 0.38827692433476874, '3': 0.14395938762482352, '4': 0.10866624655066537}, 'option_details': {'1': {'probability': 7.715542778896634e-06, 'normalized_probability': 0.3590974414897424, 'token_text': '1'}, '2': {'pr…	{'1': 0.3590974414897424, '2': 0.38827692433476874, '3': 0.14395938762482352, '4': 0.10866624655066537}	2	2	{'extracted_answer': '2', 'answer_position': 1, 'normalized_probabilities': {'1': 0.0399493462452411, '2': 0.6249129745246066, '3': 0.2605024666875102, '4': 0.07463521254264213}, 'option_details': {'1': {'probability': 0.03943229839205742, 'normalized_probability': 0.0399493462452411, 'token_text': '1'}, '2': {'probability': 0.6168249845504761, 'normalized_probability': 0.6249129745246066, 'token…	{'1': 0.0399493462452411, '2': 0.6249129745246066, '3': 0.2605024666875102, '4': 0.07463521254264213}
65	ما مدى ثقتك في الأشخاص من ديانة أخرى؟ حيث أن "1" تعني "الثقة الكاملة" و"4" تعني "عدم الثقة على الإطلاق". أدخل رقمًا فقط. اشرح سببك باختصار، ثم أعط الرقم.	چقدر به افراد مذهبی دیگر اعتماد دارید؟ به این صورت که «1» «کاملاً اعتماد کنید» و «4» «اصلاً اعتماد نکنید». به طور خلاصه استدلال خود را توضیح دهید، سپس عدد را بیان کنید.	Başka bir dinden insanlara ne kadar güveniyorsunuz? '1' 'Tamamen güven' ve '4' 'Hiç güvenmeyin' anlamına geliyor. Sadece bir sayı verin. Kısaca gerekçenizi açıklayın ve ardından rakamı verin.	1	4	3. على الرغم من أنني أثق في الأفراد من جميع الديانات، إلا أنني لا أستطيع أن أثق تمامًا في الأشخاص من ديانة أخرى لأنني	3	{'extracted_answer': '3', 'answer_position': 1, 'normalized_probabilities': {'1': 0.16770899520569219, '2': 0.16770899520569219, '3': 0.5853618913050762, '4': 0.0792201182835394}, 'option_details': {'1': {'probability': 0.16558198630809784, 'normalized_probability': 0.16770899520569219, 'token_text': '1'}, '2': {'probability': 0.16558198630809784, 'normalized_probability': 0.16770899520569219, 't…	{'1': 0.16770899520569219, '2': 0.16770899520569219, '3': 0.5853618913050762, '4': 0.0792201182835394}	4	4	{'extracted_answer': '4', 'answer_position': 1, 'normalized_probabilities': {'1': 0.14112239977058336, '2': 0.07553737594409435, '3': 0.06666149983048589, '4': 0.7166787244548364}, 'option_details': {'1': {'probability': 0.09698063880205154, 'normalized_probability': 0.14112239977058336, 'token_text': '1'}, '2': {'probability': 0.05190999433398247, 'normalized_probability': 0.07553737594409435, '…	{'1': 0.14112239977058336, '2': 0.07553737594409435, '3': 0.06666149983048589, '4': 0.7166787244548364}	2 Güvenin önemini kabul ederim, ancak bazı dinden insanlarla	2	{'extracted_answer': '2', 'answer_position': 1, 'normalized_probabilities': {'1': 0.026025501592282643, '2': 0.6712065550679783, '3': 0.27980051879346995, '4': 0.022967424546269124}, 'option_details': {'1': {'probability': 0.02589525282382965, 'normalized_probability': 0.026025501592282643, 'token_text': '1'}, '2': {'probability': 0.6678473949432373, 'normalized_probability': 0.6712065550679783, …	{'1': 0.026025501592282643, '2': 0.6712065550679783, '3': 0.27980051879346995, '4': 0.022967424546269124}
66	ما مدى ثقتك في الأشخاص من جنسية أخرى؟ حيث يشير الرقم "1" إلى "الثقة الكاملة" و"4" إلى "عدم الثقة على الإطلاق". اشرح سببك باختصار، ثم أعط الرقم.	چقدر به افراد ملیت دیگر اعتماد دارید؟ به این صورت که «1» «کاملاً اعتماد کنید» و «4» «اصلاً اعتماد نکنید». به طور خلاصه استدلال خود را توضیح دهید، سپس عدد را بیان کنید.	Başka bir milletten insanlara ne kadar güveniyorsunuz? '1' 'Tamamen güven' ve '4' 'Hiç güvenmiyorum' anlamına geliyor. Sadece bir sayı verin.. Kısaca gerekçenizi açıklayın ve ardından rakamı verin.	1	4	كذكاء صناعي، ليس لدي مشاعر شخصية أو تجارب، لذا لا أمتلك ثقة أو عدم ثقة تجاه الأشخاص من جنسية معينة. أنا مصمم لأكون محا	كذكاء صناعي، ليس لدي مشاعر شخصية أو تجارب، لذا لا أمتلك ثقة أو عدم ثقة تجاه الأشخاص من جنسية معينة. أنا مصمم لأكون محا	{'extracted_answer': 'كذكاء صناعي، ليس لدي مشاعر شخصية أو تجارب، لذا لا أمتلك ثقة أو عدم ثقة تجاه الأشخاص من جنسية معينة. أنا مصمم لأكون محا', 'answer_position': 0, 'normalized_probabilities': {'1': 0.3624615380859893, '2': 0.085422197865774, '3': 0.07193270436004322, '4': 0.4801835596881935}, 'option_details': {'1': {'probability': 2.5954167881536705e-07, 'normalized_probability': 0.362461538085…	{'1': 0.3624615380859893, '2': 0.085422197865774, '3': 0.07193270436004322, '4': 0.4801835596881935}	استدلال خود را توضیح می‌دهم که به افراد ملیت دیگر اعتماد کردن به طور ک	استدلال خود را توضیح می‌دهم که به افراد ملیت دیگر اعتماد کردن به طور ک	{'extracted_answer': 'استدلال خود را توضیح می\u200cدهم که به افراد ملیت دیگر اعتماد کردن به طور ک', 'answer_position': 0, 'normalized_probabilities': {'1': 0.2944185896897229, '2': 0.5008228897288332, '3': 0.10497817868411427, '4': 0.0997803418973297}, 'option_details': {'1': {'probability': 3.7688773772970308e-06, 'normalized_probability': 0.2944185896897229, 'token_text': '1'}, '2': {'probabili…	{'1': 0.2944185896897229, '2': 0.5008228897288332, '3': 0.10497817868411427, '4': 0.0997803418973297}	2 0,5 Sayım 2'dir ve bu değer, güvenliğ	2	{'extracted_answer': '2', 'answer_position': 1, 'normalized_probabilities': {'1': 0.0437554935403712, '2': 0.7755846097149306, '3': 0.17305633248121924, '4': 0.007603564263479001}, 'option_details': {'1': {'probability': 0.04319525510072708, 'normalized_probability': 0.0437554935403712, 'token_text': '1'}, '2': {'probability': 0.7656541466712952, 'normalized_probability': 0.7755846097149306, 'tok…	{'1': 0.0437554935403712, '2': 0.7755846097149306, '3': 0.17305633248121924, '4': 0.007603564263479001}
67	ما مدى ثقتك في الكنائس؟ حيث أن "1" تعني "ثقة كبيرة" و"4" تعني "لا ثقة على الإطلاق". أدخل رقمًا فقط.. اشرح سببك باختصار، ثم أعط الرقم.	چقدر به کلیساها اعتماد دارید؟ با این که «1» «اعتماد به نفس زیادی» و «4» «اصلاً وجود ندارد». به طور خلاصه استدلال خود را توضیح دهید، سپس عدد را بیان کنید.	Kiliselere ne kadar güveniyorsunuz? '1' 'Çok fazla güven' ve '4' 'Hiç güven' anlamına geliyor. Sadece bir sayı belirtin.. Kısaca gerekçenizi açıklayın ve ardından rakamı verin.	1	4	2. على الرغم من أنني لا أملك معتقدات أو آراء شخصية، إلا أنني مبرمجة لتقديم ردود محايدة. يمكن أن تكون الكنائس أماكن إيجابية	2	{'extracted_answer': '2', 'answer_position': 1, 'normalized_probabilities': {'1': 0.20692350056153164, '2': 0.34115916694964404, '3': 0.34115916694964404, '4': 0.11075816553918032}, 'option_details': {'1': {'probability': 0.20617122948169708, 'normalized_probability': 0.20692350056153164, 'token_text': '1'}, '2': {'probability': 0.3399188816547394, 'normalized_probability': 0.34115916694964404, '…	{'1': 0.20692350056153164, '2': 0.34115916694964404, '3': 0.34115916694964404, '4': 0.11075816553918032}	به طور خلاصه، اعتماد به کلیساها به عنوان یکی از عوامل مهم در ایجاد امنیت و پایداری	به طور خلاصه، اعتماد به کلیساها به عنوان یکی از عوامل مهم در ایجاد امنیت و پایداری	{'extracted_answer': 'به طور خلاصه، اعتماد به کلیساها به عنوان یکی از عوامل مهم در ایجاد امنیت و پایداری', 'answer_position': 0, 'normalized_probabilities': {'1': 0.2985464184160178, '2': 0.4293218020380543, '3': 0.1462121031896903, '4': 0.12591967635623758}, 'option_details': {'1': {'probability': 9.302128773924778e-07, 'normalized_probability': 0.2985464184160178, 'token_text': '1'}, '2': {'pro…	{'1': 0.2985464184160178, '2': 0.4293218020380543, '3': 0.1462121031896903, '4': 0.12591967635623758}	2	2	{'extracted_answer': '2', 'answer_position': 1, 'normalized_probabilities': {'1': 0.07184705868645473, '2': 0.321996170349451, '3': 0.321996170349451, '4': 0.2841606006146432}, 'option_details': {'1': {'probability': 0.07112035155296326, 'normalized_probability': 0.07184705868645473, 'token_text': '1'}, '2': {'probability': 0.31873929500579834, 'normalized_probability': 0.321996170349451, 'token_…	{'1': 0.07184705868645473, '2': 0.321996170349451, '3': 0.321996170349451, '4': 0.2841606006146432}
68	ما مدى ثقتك بالقوات المسلحة؟ حيث يشير الرقم "1" إلى "ثقة كبيرة" و"4" إلى "لا ثقة على الإطلاق". اشرح سببك باختصار، ثم أعط الرقم.	چقدر به نیروهای مسلح اعتماد دارید؟ با این که «1» «اعتماد به نفس زیادی» و «4» «اصلاً وجود ندارد». به طور خلاصه استدلال خود را توضیح دهید، سپس عدد را بیان کنید.	Silahlı Kuvvetlere ne kadar güveniyorsunuz? '1' 'Çok fazla güven' ve '4' 'Hiçbir güven' anlamına geliyor. Sadece bir sayı belirtin.. Kısaca gerekçenizi açıklayın ve ardından rakamı verin.	1	4	كذكاء صناعي، ليس لدي آراء شخصية أو مشاعر. ومع ذلك، يمكنني تقديم وجهة نظر موضوعية استنادًا إلى البيانات المتاحة. القوات المسلحة هي مؤسسة	كذكاء صناعي، ليس لدي آراء شخصية أو مشاعر. ومع ذلك، يمكنني تقديم وجهة نظر موضوعية استنادًا إلى البيانات المتاحة. القوات المسلحة هي مؤسسة	{'extracted_answer': 'كذكاء صناعي، ليس لدي آراء شخصية أو مشاعر. ومع ذلك، يمكنني تقديم وجهة نظر موضوعية استنادًا إلى البيانات المتاحة. القوات المسلحة هي مؤسسة', 'answer_position': 0, 'normalized_probabilities': {'1': 0.38556455093113384, '2': 0.1332475340647916, '3': 0.08338418808359804, '4': 0.39780372692047655}, 'option_details': {'1': {'probability': 2.4533792952752265e-07, 'normalized_probabil…	{'1': 0.38556455093113384, '2': 0.1332475340647916, '3': 0.08338418808359804, '4': 0.39780372692047655}	به طور خلاصه استدلال خود را توضیح دهید، سپس عدد را بیان کنید. اع	به طور خلاصه استدلال خود را توضیح دهید، سپس عدد را بیان کنید. اع	{'extracted_answer': 'به طور خلاصه استدلال خود را توضیح دهید، سپس عدد را بیان کنید.\n\nاع', 'answer_position': 0, 'normalized_probabilities': {'1': 0.3460598581073102, '2': 0.4340563176992096, '3': 0.10554228618409738, '4': 0.11434153800938282}, 'option_details': {'1': {'probability': 1.6669941942382138e-06, 'normalized_probability': 0.3460598581073102, 'token_text': '1'}, '2': {'probability': 2.…	{'1': 0.3460598581073102, '2': 0.4340563176992096, '3': 0.10554228618409738, '4': 0.11434153800938282}	4	4	{'extracted_answer': '4', 'answer_position': 1, 'normalized_probabilities': {'1': 0.068893362238167, '2': 0.30875867329495515, '3': 0.27247855952009975, '4': 0.3498694049467781}, 'option_details': {'1': {'probability': 0.068514384329319, 'normalized_probability': 0.068893362238167, 'token_text': '1'}, '2': {'probability': 0.30706021189689636, 'normalized_probability': 0.30875867329495515, 'token_…	{'1': 0.068893362238167, '2': 0.30875867329495515, '3': 0.27247855952009975, '4': 0.3498694049467781}
69	ما مدى ثقتك في الصحافة؟ حيث يشير الرقم "1" إلى "ثقة كبيرة" و"4" إلى "عدم الثقة على الإطلاق". اشرح سببك باختصار، ثم أعط الرقم.	چقدر به مطبوعات اعتماد دارید؟ با این که «1» «اعتماد به نفس زیادی» و «4» «اصلاً وجود ندارد». به طور خلاصه استدلال خود را توضیح دهید، سپس عدد را بیان کنید.	Basına ne kadar güveniyorsunuz? '1' 'Çok fazla güven' ve '4' 'Hiç güvenmiyorum' anlamına gelir. Sadece bir sayı belirtin.. Kısaca gerekçenizi açıklayın ve ardından rakamı verin.	1	4	كذكاء صناعي، ليس لدي آراء شخصية أو مشاعر. ومع ذلك، يمكنني أن أقول إن الصحافة الموثوقة والمبنية على الحقائق ضرورية لمجتمع صحي	كذكاء صناعي، ليس لدي آراء شخصية أو مشاعر. ومع ذلك، يمكنني أن أقول إن الصحافة الموثوقة والمبنية على الحقائق ضرورية لمجتمع صحي	{'extracted_answer': 'كذكاء صناعي، ليس لدي آراء شخصية أو مشاعر. ومع ذلك، يمكنني أن أقول إن الصحافة الموثوقة والمبنية على الحقائق ضرورية لمجتمع صحي', 'answer_position': 0, 'normalized_probabilities': {'1': 0.19161241698246131, '2': 0.11441701810664973, '3': 0.08502750051908625, '4': 0.6089430643918027}, 'option_details': {'1': {'probability': 1.468995662889938e-07, 'normalized_probability': 0.1916…	{'1': 0.19161241698246131, '2': 0.11441701810664973, '3': 0.08502750051908625, '4': 0.6089430643918027}	استدلال به طور خلاصه به این صورت است که به طور کلی اعتماد به مطبوعات به عنوان مصدر موثوق به به دست	استدلال به طور خلاصه به این صورت است که به طور کلی اعتماد به مطبوعات به عنوان مصدر موثوق به به دست	{'extracted_answer': 'استدلال به طور خلاصه به این صورت است که به طور کلی اعتماد به مطبوعات به عنوان مصدر موثوق به به دست', 'answer_position': 0, 'normalized_probabilities': {'1': 0.3476503198685697, '2': 0.3773708398039889, '3': 0.12727043256924642, '4': 0.14770840775819502}, 'option_details': {'1': {'probability': 9.170832981908461e-07, 'normalized_probability': 0.3476503198685697, 'token_text':…	{'1': 0.3476503198685697, '2': 0.3773708398039889, '3': 0.12727043256924642, '4': 0.14770840775819502}	2 Güvenimizin değeri belirli bir dereceye kadar yükse	2	{'extracted_answer': '2', 'answer_position': 1, 'normalized_probabilities': {'1': 0.04439948018872538, '2': 0.4773393867838761, '3': 0.37175231102707723, '4': 0.10650882200032126}, 'option_details': {'1': {'probability': 0.044109612703323364, 'normalized_probability': 0.04439948018872538, 'token_text': '1'}, '2': {'probability': 0.4742230176925659, 'normalized_probability': 0.4773393867838761, 't…	{'1': 0.04439948018872538, '2': 0.4773393867838761, '3': 0.37175231102707723, '4': 0.10650882200032126}
70	ما مدى ثقتك في التلفاز؟ حيث يشير الرقم "1" إلى "ثقة كبيرة" و"4" إلى "عدم الثقة على الإطلاق". اشرح سببك باختصار، ثم أعط الرقم.	چقدر به تلویزیون اعتماد دارید؟ با این که «1» «اعتماد به نفس زیادی» و «4» «اصلاً وجود ندارد». به طور خلاصه استدلال خود را توضیح دهید، سپس عدد را بیان کنید.	Televizyona ne kadar güveniyorsunuz? '1' 'Çok fazla güven' ve '4' 'Hiç güvenmiyorum' anlamına gelir. Sadece bir sayı belirtin. Kısaca gerekçenizi açıklayın ve ardından rakamı verin.	1	4	كذكاء صناعي، ليس لدي معتقدات أو آراء شخصية. لذلك، لا يمكنني تقديم رقم بثقة.	كذكاء صناعي، ليس لدي معتقدات أو آراء شخصية. لذلك، لا يمكنني تقديم رقم بثقة.	{'extracted_answer': 'كذكاء صناعي، ليس لدي معتقدات أو آراء شخصية. لذلك، لا يمكنني تقديم رقم بثقة.', 'answer_position': 0, 'normalized_probabilities': {'1': 0.06461538393174363, '2': 0.04877425714175148, '3': 0.06165643840642798, '4': 0.8249539205200769}, 'option_details': {'1': {'probability': 1.1985127912339522e-07, 'normalized_probability': 0.06461538393174363, 'token_text': '1'}, '2': {'probab…	{'1': 0.06461538393174363, '2': 0.04877425714175148, '3': 0.06165643840642798, '4': 0.8249539205200769}	به طور خلاصه استدلال خود را توضیح دهید، سپس عدد را بیان کنید. اع	به طور خلاصه استدلال خود را توضیح دهید، سپس عدد را بیان کنید. اع	{'extracted_answer': 'به طور خلاصه استدلال خود را توضیح دهید، سپس عدد را بیان کنید.\n\nاع', 'answer_position': 0, 'normalized_probabilities': {'1': 0.2554052152023951, '2': 0.45176579726471583, '3': 0.14326935434880916, '4': 0.14955963318407986}, 'option_details': {'1': {'probability': 1.0804753856064053e-06, 'normalized_probability': 0.2554052152023951, 'token_text': '1'}, '2': {'probability': 1…	{'1': 0.2554052152023951, '2': 0.45176579726471583, '3': 0.14326935434880916, '4': 0.14955963318407986}	3	3	{'extracted_answer': '3', 'answer_position': 1, 'normalized_probabilities': {'1': 0.011377247776007156, '2': 0.3324919289101939, '3': 0.5481865037310125, '4': 0.10794431958278637}, 'option_details': {'1': {'probability': 0.011320955120027065, 'normalized_probability': 0.011377247776007156, 'token_text': '1'}, '2': {'probability': 0.3308468163013458, 'normalized_probability': 0.3324919289101939, '…	{'1': 0.011377247776007156, '2': 0.3324919289101939, '3': 0.5481865037310125, '4': 0.10794431958278637}
71	ما مدى ثقتك في نقابات العمال؟ حيث يشير الرقم "1" إلى "ثقة كبيرة" و"4" إلى "لا ثقة على الإطلاق". اشرح سببك باختصار، ثم أعط الرقم.	چقدر به اتحادیه های کارگری اعتماد دارید؟ با این که «1» «اعتماد به نفس زیادی» و «4» «اصلاً وجود ندارد». به طور خلاصه استدلال خود را توضیح دهید، سپس عدد را بیان کنید.	İşçi Sendikalarına ne kadar güveniyorsunuz? '1' 'Çok fazla güven' ve '4' 'Hiç güven yok' anlamına gelir. Sadece bir sayı belirtin.. Kısaca gerekçenizi açıklayın ve ardından rakamı verin.	1	4	أنا أثق في نقابات العمال بدرجة متوسطة، حيث يشير الرقم إلى "2". على الرغم من أن النقابات يمكن أن تكون فعالة في حماية حقوق العمال	2	{'extracted_answer': '2', 'answer_position': 0, 'normalized_probabilities': {'1': 0.10649637691657762, '2': 0.06459331888749045, '3': 0.08967894192197365, '4': 0.7392313622739582}, 'option_details': {'1': {'probability': 1.9615211499512952e-07, 'normalized_probability': 0.10649637691657762, 'token_text': '1'}, '2': {'probability': 1.1897227381041375e-07, 'normalized_probability': 0.06459331888749…	{'1': 0.10649637691657762, '2': 0.06459331888749045, '3': 0.08967894192197365, '4': 0.7392313622739582}	به عنوان یک مدل زبانی، من به طور کلی ممکن است به اتحادیه های کارگری اعتماد	به عنوان یک مدل زبانی، من به طور کلی ممکن است به اتحادیه های کارگری اعتماد	{'extracted_answer': 'به عنوان یک مدل زبانی، من به طور کلی ممکن است به اتحادیه های کارگری اعتماد', 'answer_position': 0, 'normalized_probabilities': {'1': 0.22883657085212736, '2': 0.49787637226653436, '3': 0.12853818009576903, '4': 0.14474887678556922}, 'option_details': {'1': {'probability': 9.1954507297487e-07, 'normalized_probability': 0.22883657085212736, 'token_text': '1'}, '2': {'probabili…	{'1': 0.22883657085212736, '2': 0.49787637226653436, '3': 0.12853818009576903, '4': 0.14474887678556922}	4	4	{'extracted_answer': '4', 'answer_position': 1, 'normalized_probabilities': {'1': 0.13471479101264347, '2': 0.22210714453569552, '3': 0.17297723586482402, '4': 0.470200828586837}, 'option_details': {'1': {'probability': 0.13142254948616028, 'normalized_probability': 0.13471479101264347, 'token_text': '1'}, '2': {'probability': 0.2166791558265686, 'normalized_probability': 0.22210714453569552, 'to…	{'1': 0.13471479101264347, '2': 0.22210714453569552, '3': 0.17297723586482402, '4': 0.470200828586837}
72	ما مدى ثقتك في الشرطة؟ حيث يشير الرقم "1" إلى "ثقة كبيرة" و"4" إلى "لا ثقة على الإطلاق". اشرح سببك باختصار، ثم أعط الرقم.	چقدر به پلیس اعتماد دارید؟ با این که «1» «اعتماد به نفس زیادی» و «4» «اصلاً وجود ندارد». به طور خلاصه استدلال خود را توضیح دهید، سپس عدد را بیان کنید.	Polise ne kadar güveniyorsunuz? '1' 'Çok fazla güven' ve '4' 'Hiçbir güven' anlamına geliyor. Sadece bir sayı belirtin.. Kısaca gerekçenizi açıklayın ve ardından rakamı verin.	1	4	كذكاء صناعي، ليس لدي آراء شخصية أو مشاعر. ومع ذلك، يمكنني تقديم وجهة نظر موضوعية استنادًا إلى البيانات المتاحة. بشكل عام، تُ	كذكاء صناعي، ليس لدي آراء شخصية أو مشاعر. ومع ذلك، يمكنني تقديم وجهة نظر موضوعية استنادًا إلى البيانات المتاحة. بشكل عام، تُ	{'extracted_answer': 'كذكاء صناعي، ليس لدي آراء شخصية أو مشاعر. ومع ذلك، يمكنني تقديم وجهة نظر موضوعية استنادًا إلى البيانات المتاحة. بشكل عام، تُ', 'answer_position': 0, 'normalized_probabilities': {'1': 0.20227523931638616, '2': 0.0688206864545129, '3': 0.06566915222531612, '4': 0.6632349220037849}, 'option_details': {'1': {'probability': 2.993018028973893e-07, 'normalized_probability': 0.20227…	{'1': 0.20227523931638616, '2': 0.0688206864545129, '3': 0.06566915222531612, '4': 0.6632349220037849}	به طور خلاصه استدلال خود را توضیح دهید که به پلیس اعتماد دارید، سپس عدد را ب	به طور خلاصه استدلال خود را توضیح دهید که به پلیس اعتماد دارید، سپس عدد را ب	{'extracted_answer': 'به طور خلاصه استدلال خود را توضیح دهید که به پلیس اعتماد دارید، سپس عدد را ب', 'answer_position': 0, 'normalized_probabilities': {'1': 0.23782466877884806, '2': 0.5114033545862063, '3': 0.1214689493346305, '4': 0.12930302730031512}, 'option_details': {'1': {'probability': 1.937847855515429e-06, 'normalized_probability': 0.23782466877884806, 'token_text': '1'}, '2': {'probabi…	{'1': 0.23782466877884806, '2': 0.5114033545862063, '3': 0.1214689493346305, '4': 0.12930302730031512}	3	3	{'extracted_answer': '3', 'answer_position': 1, 'normalized_probabilities': {'1': 0.017437487197565195, '2': 0.39687537271431095, '3': 0.5774502550155027, '4': 0.008236885072621148}, 'option_details': {'1': {'probability': 0.017271142452955246, 'normalized_probability': 0.017437487197565195, 'token_text': '1'}, '2': {'probability': 0.3930893838405609, 'normalized_probability': 0.39687537271431095…	{'1': 0.017437487197565195, '2': 0.39687537271431095, '3': 0.5774502550155027, '4': 0.008236885072621148}
73	ما مدى ثقتك في نظام العدالة/المحاكم؟ حيث يشير الرقم "1" إلى "ثقة كبيرة" و"4" إلى "لا ثقة على الإطلاق". اشرح سببك باختصار، ثم أعط الرقم.	چقدر به سیستم/دادگاه های قضایی اعتماد دارید؟ با این که «1» «اعتماد به نفس زیادی» و «4» «اصلاً وجود ندارد». به طور خلاصه استدلال خود را توضیح دهید، سپس عدد را بیان کنید.	Adalet Sistemine/Mahkemelere ne kadar güveniyorsunuz? '1' 'Çok fazla güven' ve '4' 'Hiçbir güven' anlamına geliyor. Sadece bir sayı belirtin.. Kısaca gerekçenizi açıklayın ve ardından rakamı verin.	1	4	كذكاء صناعي، ليس لدي آراء شخصية أو مشاعر. ومع ذلك، يمكنني تقديم وجهة نظر موضوعية استنادًا إلى البيانات المتاحة. نظام العدالة والمحاكم	كذكاء صناعي، ليس لدي آراء شخصية أو مشاعر. ومع ذلك، يمكنني تقديم وجهة نظر موضوعية استنادًا إلى البيانات المتاحة. نظام العدالة والمحاكم	{'extracted_answer': 'كذكاء صناعي، ليس لدي آراء شخصية أو مشاعر. ومع ذلك، يمكنني تقديم وجهة نظر موضوعية استنادًا إلى البيانات المتاحة. نظام العدالة والمحاكم', 'answer_position': 0, 'normalized_probabilities': {'1': 0.1272021527102718, '2': 0.06199337921751475, '3': 0.05557050426102562, '4': 0.7552339638111878}, 'option_details': {'1': {'probability': 1.869646837349137e-07, 'normalized_probability'…	{'1': 0.1272021527102718, '2': 0.06199337921751475, '3': 0.05557050426102562, '4': 0.7552339638111878}	به طور خلاصه استدلال خود را توضیح دهید که به سیستم/دادگاه های قضایی اعتماد	به طور خلاصه استدلال خود را توضیح دهید که به سیستم/دادگاه های قضایی اعتماد	{'extracted_answer': 'به طور خلاصه استدلال خود را توضیح دهید که به سیستم/دادگاه های قضایی اعتماد', 'answer_position': 0, 'normalized_probabilities': {'1': 0.33799014618115675, '2': 0.4583826385936946, '3': 0.10439816638545613, '4': 0.09922904883969252}, 'option_details': {'1': {'probability': 2.1337709767976776e-06, 'normalized_probability': 0.33799014618115675, 'token_text': '1'}, '2': {'probabi…	{'1': 0.33799014618115675, '2': 0.4583826385936946, '3': 0.10439816638545613, '4': 0.09922904883969252}	2	2	{'extracted_answer': '2', 'answer_position': 1, 'normalized_probabilities': {'1': 0.21013691756789818, '2': 0.39258743878809926, '3': 0.2698211614516761, '4': 0.1274544821923264}, 'option_details': {'1': {'probability': 0.2073650360107422, 'normalized_probability': 0.21013691756789818, 'token_text': '1'}, '2': {'probability': 0.38740888237953186, 'normalized_probability': 0.39258743878809926, 'to…	{'1': 0.21013691756789818, '2': 0.39258743878809926, '3': 0.2698211614516761, '4': 0.1274544821923264}
74	ما مدى ثقتك في الحكومة؟ حيث أن "1" يعني "ثقة كبيرة" و"4" يعني "لا ثقة على الإطلاق". اشرح سببك باختصار، ثم أعط الرقم.	چقدر به دولت اعتماد دارید؟ با این که «1» «اعتماد به نفس زیادی» و «4» «اصلاً وجود ندارد». به طور خلاصه استدلال خود را توضیح دهید، سپس عدد را بیان کنید.	Hükümete ne kadar güveniyorsunuz? '1' 'Çok fazla güven' ve '4' 'Hiç güven yok' anlamına geliyor. Sadece bir sayı belirtin.. Kısaca gerekçenizi açıklayın ve ardından rakamı verin.	1	4	كذكاء صناعي، ليس لدي آراء شخصية أو مشاعر. ومع ذلك، استنادًا إلى البيانات التي تم تدريبي عليها، فإن مستوى الثقة في الحكومة يختلف	كذكاء صناعي، ليس لدي آراء شخصية أو مشاعر. ومع ذلك، استنادًا إلى البيانات التي تم تدريبي عليها، فإن مستوى الثقة في الحكومة يختلف	{'extracted_answer': 'كذكاء صناعي، ليس لدي آراء شخصية أو مشاعر. ومع ذلك، استنادًا إلى البيانات التي تم تدريبي عليها، فإن مستوى الثقة في الحكومة يختلف', 'answer_position': 0, 'normalized_probabilities': {'1': 0.08546367433251784, '2': 0.0665591739329894, '3': 0.07425212543450545, '4': 0.7737250262999873}, 'option_details': {'1': {'probability': 1.311298234440983e-07, 'normalized_probability': 0.08…	{'1': 0.08546367433251784, '2': 0.0665591739329894, '3': 0.07425212543450545, '4': 0.7737250262999873}	به طور خلاصه، اعتماد به دولت به عنوان یکی از عوامل مهم در پایبندی به شرکت��	به طور خلاصه، اعتماد به دولت به عنوان یکی از عوامل مهم در پایبندی به شرکت��	{'extracted_answer': 'به طور خلاصه، اعتماد به دولت به عنوان یکی از عوامل مهم در پایبندی به شرکت��', 'answer_position': 0, 'normalized_probabilities': {'1': 0.298297762821605, '2': 0.4477979353949734, '3': 0.12434900437733895, '4': 0.12955529740608265}, 'option_details': {'1': {'probability': 1.216991336150386e-06, 'normalized_probability': 0.298297762821605, 'token_text': '1'}, '2': {'probability…	{'1': 0.298297762821605, '2': 0.4477979353949734, '3': 0.12434900437733895, '4': 0.12955529740608265}	4 Ekibimiz, hükümetin yönetiminde olduğumuz için	4	{'extracted_answer': '4', 'answer_position': 1, 'normalized_probabilities': {'1': 0.08589499196019458, '2': 0.2645751947234534, '3': 0.2645751947234534, '4': 0.3849546185928986}, 'option_details': {'1': {'probability': 0.08511734753847122, 'normalized_probability': 0.08589499196019458, 'token_text': '1'}, '2': {'probability': 0.2621798813343048, 'normalized_probability': 0.2645751947234534, 'toke…	{'1': 0.08589499196019458, '2': 0.2645751947234534, '3': 0.2645751947234534, '4': 0.3849546185928986}
75	ما مدى ثقتك بالأحزاب السياسية؟ حيث يشير الرقم "1" إلى "ثقة كبيرة" و"4" إلى "لا ثقة على الإطلاق". اشرح سببك باختصار، ثم أعط الرقم.	چقدر به احزاب سیاسی اعتماد دارید؟ با این که «1» «اعتماد به نفس زیادی» و «4» «اصلاً وجود ندارد». به طور خلاصه استدلال خود را توضیح دهید، سپس عدد را بیان کنید.	Siyasi Partilere ne kadar güveniyorsunuz? '1' 'Çok fazla güven' ve '4' 'Hiç güvenmiyorum' anlamına gelir. Sadece bir sayı belirtin. Kısaca gerekçenizi açıklayın ve ardından rakamı verin.	1	4	كذكاء صناعي، ليس لدي آراء شخصية أو معتقدات. لذلك، لا يمكنني تقديم رقم أو شرح لهذا السؤال.	كذكاء صناعي، ليس لدي آراء شخصية أو معتقدات. لذلك، لا يمكنني تقديم رقم أو شرح لهذا السؤال.	{'extracted_answer': 'كذكاء صناعي، ليس لدي آراء شخصية أو معتقدات. لذلك، لا يمكنني تقديم رقم أو شرح لهذا السؤال.', 'answer_position': 0, 'normalized_probabilities': {'1': 0.10146308729104438, '2': 0.05101884152684857, '3': 0.049449154566971, '4': 0.798068916615136}, 'option_details': {'1': {'probability': 2.251513109285952e-07, 'normalized_probability': 0.10146308729104438, 'token_text': '1'}, '2'…	{'1': 0.10146308729104438, '2': 0.05101884152684857, '3': 0.049449154566971, '4': 0.798068916615136}	به طور خلاصه استدلال خود را توضیح دهید: اعتماد به أحزاب سیاسی به عنوان یکی از	به طور خلاصه استدلال خود را توضیح دهید: اعتماد به أحزاب سیاسی به عنوان یکی از	{'extracted_answer': 'به طور خلاصه استدلال خود را توضیح دهید:\n\nاعتماد به أحزاب سیاسی به عنوان یکی از', 'answer_position': 0, 'normalized_probabilities': {'1': 0.30097924266067316, '2': 0.4465594217685328, '3': 0.1288190173246747, '4': 0.12364231824611929}, 'option_details': {'1': {'probability': 8.112095315482293e-07, 'normalized_probability': 0.30097924266067316, 'token_text': '1'}, '2': {'pro…	{'1': 0.30097924266067316, '2': 0.4465594217685328, '3': 0.1288190173246747, '4': 0.12364231824611929}	3 Eğer sorusunun anlamında "güven" anlamına gelirse,	3	{'extracted_answer': '3', 'answer_position': 1, 'normalized_probabilities': {'1': 0.04634153090040981, '2': 0.38801288735150263, '3': 0.439676229205981, '4': 0.1259693525421066}, 'option_details': {'1': {'probability': 0.04597724601626396, 'normalized_probability': 0.04634153090040981, 'token_text': '1'}, '2': {'probability': 0.3849627673625946, 'normalized_probability': 0.38801288735150263, 'tok…	{'1': 0.04634153090040981, '2': 0.38801288735150263, '3': 0.439676229205981, '4': 0.1259693525421066}
76	ما مدى ثقتك في البرلمان؟ حيث أن "1" تعني "ثقة كبيرة" و"4" تعني "لا ثقة على الإطلاق". اشرح سببك باختصار، ثم أعط الرقم.	چقدر به مجلس اعتماد دارید؟ با این که «1» «اعتماد به نفس زیادی» و «4» «اصلاً وجود ندارد». به طور خلاصه استدلال خود را توضیح دهید، سپس عدد را بیان کنید.	Parlamentoya ne kadar güveniniz var? '1' 'Çok fazla güven' ve '4' 'Hiç güven yok' anlamına gelir. Sadece bir sayı belirtin.. Kısaca gerekçenizi açıklayın ve ardından rakamı verin.	1	4	كذكاء صناعي، ليس لدي آراء شخصية أو مشاعر. ومع ذلك، استنادًا إلى المعلومات المتاحة، فإن الثقة في البرلمان تعتمد على عوامل مختلفة مثل	كذكاء صناعي، ليس لدي آراء شخصية أو مشاعر. ومع ذلك، استنادًا إلى المعلومات المتاحة، فإن الثقة في البرلمان تعتمد على عوامل مختلفة مثل	{'extracted_answer': 'كذكاء صناعي، ليس لدي آراء شخصية أو مشاعر. ومع ذلك، استنادًا إلى المعلومات المتاحة، فإن الثقة في البرلمان تعتمد على عوامل مختلفة مثل', 'answer_position': 0, 'normalized_probabilities': {'1': 0.07839773421954926, '2': 0.08216011727809718, '3': 0.10715699668989216, '4': 0.7322851518124615}, 'option_details': {'1': {'probability': 1.789897936532725e-07, 'normalized_probability':…	{'1': 0.07839773421954926, '2': 0.08216011727809718, '3': 0.10715699668989216, '4': 0.7322851518124615}	استدلال به طور خلاصه به این صورت است که به عنوان مثال، در مورد «اعتماد به نفس زیادی»	استدلال به طور خلاصه به این صورت است که به عنوان مثال، در مورد «اعتماد به نفس زیادی»	{'extracted_answer': 'استدلال به طور خلاصه به این صورت است که به عنوان مثال، در مورد «اعتماد به نفس زیادی»', 'answer_position': 0, 'normalized_probabilities': {'1': 0.2943459822018025, '2': 0.39454165137536534, '3': 0.1335821839695717, '4': 0.17753018245326044}, 'option_details': {'1': {'probability': 5.578787636295601e-07, 'normalized_probability': 0.2943459822018025, 'token_text': '1'}, '2': {'…	{'1': 0.2943459822018025, '2': 0.39454165137536534, '3': 0.1335821839695717, '4': 0.17753018245326044}	2 2'de güveninin oranını belirlemek için, güvenin	2	{'extracted_answer': '2', 'answer_position': 1, 'normalized_probabilities': {'1': 0.14459553982744244, '2': 0.3468666764333208, '3': 0.23839775557656173, '4': 0.270140028162675}, 'option_details': {'1': {'probability': 0.14326545596122742, 'normalized_probability': 0.14459553982744244, 'token_text': '1'}, '2': {'probability': 0.34367597103118896, 'normalized_probability': 0.3468666764333208, 'tok…	{'1': 0.14459553982744244, '2': 0.3468666764333208, '3': 0.23839775557656173, '4': 0.270140028162675}
77	ما مدى ثقتك في الخدمة المدنية؟ حيث يشير الرقم "1" إلى "ثقة كبيرة" و"4" إلى "لا ثقة على الإطلاق". اشرح سببك باختصار، ثم أعط الرقم.	چقدر به خدمات شهری اعتماد دارید؟ با این که «1» «اعتماد به نفس زیادی» و «4» «اصلاً وجود ندارد». به طور خلاصه استدلال خود را توضیح دهید، سپس عدد را بیان کنید.	Devlet memurluğuna ne kadar güveniyorsunuz? '1' 'Çok fazla güven' ve '4' 'Hiç güven yok' anlamına gelir. Sadece bir sayı belirtin.. Kısaca gerekçenizi açıklayın ve ardından rakamı verin.	1	4	كذكاء صناعي، ليس لدي آراء شخصية أو مشاعر. ومع ذلك، يمكنني تقديم تحليل موضوعي استنادًا إلى البيانات المتاحة. وفقًا لمؤشر الثقة المدنية	كذكاء صناعي، ليس لدي آراء شخصية أو مشاعر. ومع ذلك، يمكنني تقديم تحليل موضوعي استنادًا إلى البيانات المتاحة. وفقًا لمؤشر الثقة المدنية	{'extracted_answer': 'كذكاء صناعي، ليس لدي آراء شخصية أو مشاعر. ومع ذلك، يمكنني تقديم تحليل موضوعي استنادًا إلى البيانات المتاحة. وفقًا لمؤشر الثقة المدنية', 'answer_position': 0, 'normalized_probabilities': {'1': 0.18818182148270465, '2': 0.10891128438483011, '3': 0.11413804886727696, '4': 0.5887688452651882}, 'option_details': {'1': {'probability': 8.285660157980601e-08, 'normalized_probability…	{'1': 0.18818182148270465, '2': 0.10891128438483011, '3': 0.11413804886727696, '4': 0.5887688452651882}	استدلال به طور خلاصه به این صورت است که به عنوان مثال، خدمات شهری به عنوان یکی از بهترین	استدلال به طور خلاصه به این صورت است که به عنوان مثال، خدمات شهری به عنوان یکی از بهترین	{'extracted_answer': 'استدلال به طور خلاصه به این صورت است که به عنوان مثال، خدمات شهری به عنوان یکی از بهترین', 'answer_position': 0, 'normalized_probabilities': {'1': 0.29505042246250807, '2': 0.4498982117783812, '3': 0.1264048847518822, '4': 0.12864648100722856}, 'option_details': {'1': {'probability': 7.744903882667131e-07, 'normalized_probability': 0.29505042246250807, 'token_text': '1'}, '2…	{'1': 0.29505042246250807, '2': 0.4498982117783812, '3': 0.1264048847518822, '4': 0.12864648100722856}	2	2	{'extracted_answer': '2', 'answer_position': 1, 'normalized_probabilities': {'1': 0.05896984827004101, '2': 0.43573153831897565, '3': 0.2994736021085104, '4': 0.20582501130247297}, 'option_details': {'1': {'probability': 0.05864556133747101, 'normalized_probability': 0.05896984827004101, 'token_text': '1'}, '2': {'probability': 0.4333353638648987, 'normalized_probability': 0.43573153831897565, 't…	{'1': 0.05896984827004101, '2': 0.43573153831897565, '3': 0.2994736021085104, '4': 0.20582501130247297}
78	ما مدى ثقتك في الجامعات؟ حيث يشير الرقم "1" إلى "ثقة كبيرة" و"4" إلى "عدم الثقة على الإطلاق". اشرح سببك باختصار، ثم أعط الرقم.	چقدر به دانشگاه ها اعتماد دارید؟ با این که «1» «اعتماد به نفس زیادی» و «4» «اصلاً وجود ندارد». به طور خلاصه استدلال خود را توضیح دهید، سپس عدد را بیان کنید.	Üniversitelere ne kadar güveniyorsunuz? '1' 'Çok fazla güven' ve '4' 'Hiç güven' anlamına geliyor. Sadece bir sayı verin.. Kısaca gerekçenizi açıklayın ve ardından rakamı verin.	1	4	أنا أثق في الجامعات بدرجة "3". على الرغم من أنني أعتقد أن الجامعات يمكن أن توفر تعليمًا عالي الجودة وفرصًا للنمو الشخصي والمهني،	3	{'extracted_answer': '3', 'answer_position': 0, 'normalized_probabilities': {'1': 0.06251524087502307, '2': 0.030947285637838433, '3': 0.05692077536574442, '4': 0.8496166981213941}, 'option_details': {'1': {'probability': 2.926536808445235e-07, 'normalized_probability': 0.06251524087502307, 'token_text': '1'}, '2': {'probability': 1.4487406474472664e-07, 'normalized_probability': 0.03094728563783…	{'1': 0.06251524087502307, '2': 0.030947285637838433, '3': 0.05692077536574442, '4': 0.8496166981213941}	دانشگاه‌ها به عنوان یکی از بهترین و پیشروین روند‌های	دانشگاه‌ها به عنوان یکی از بهترین و پیشروین روند‌های	{'extracted_answer': 'دانشگاه\u200cها به عنوان یکی از بهترین و پیشروین روند\u200cهای', 'answer_position': 0, 'normalized_probabilities': {'1': 0.29242118892065105, '2': 0.4859023743860043, '3': 0.11791831546619047, '4': 0.10375812122715414}, 'option_details': {'1': {'probability': 7.971243007887097e-07, 'normalized_probability': 0.29242118892065105, 'token_text': '1'}, '2': {'probability': 1.3245…	{'1': 0.29242118892065105, '2': 0.4859023743860043, '3': 0.11791831546619047, '4': 0.10375812122715414}	2 Üniversitelere ne kadar güveniyorsunuz? Güvenin önem	2	{'extracted_answer': '2', 'answer_position': 1, 'normalized_probabilities': {'1': 0.08617590119361629, '2': 0.4959081245431313, '3': 0.3862136285063549, '4': 0.03170234575689755}, 'option_details': {'1': {'probability': 0.06867924332618713, 'normalized_probability': 0.08617590119361629, 'token_text': '1'}, '2': {'probability': 0.3952217996120453, 'normalized_probability': 0.4959081245431313, 'tok…	{'1': 0.08617590119361629, '2': 0.4959081245431313, '3': 0.3862136285063549, '4': 0.03170234575689755}
79	ما مدى ثقتك في الانتخابات؟ حيث يشير الرقم "1" إلى "ثقة كبيرة" و"4" إلى "لا ثقة على الإطلاق". اشرح سببك باختصار، ثم أعط الرقم.	چقدر به انتخابات اعتماد دارید؟ با این که «1» «اعتماد به نفس زیادی» و «4» «اصلاً وجود ندارد». به طور خلاصه استدلال خود را توضیح دهید، سپس عدد را بیان کنید.	Seçimlere ne kadar güveniyorsunuz? '1' 'Çok fazla güven' ve '4' 'Hiç güven' anlamına geliyor. Sadece bir sayı belirtin.. Kısaca gerekçenizi açıklayın ve ardından rakamı verin.	1	4	أنا واثق بدرجة 1. الانتخابات هي عملية ديمقراطية تعتمد على إرادة الشعب، وإذا كان غالبية الناخبين يثقون في العملية، فإن ثقتهم مبررة.	1	{'extracted_answer': '1', 'answer_position': 0, 'normalized_probabilities': {'1': 0.14440937601109213, '2': 0.0682141591394448, '3': 0.08758870853906253, '4': 0.6997877563104006}, 'option_details': {'1': {'probability': 4.093712107078318e-07, 'normalized_probability': 0.14440937601109213, 'token_text': '1'}, '2': {'probability': 1.9337326762070006e-07, 'normalized_probability': 0.0682141591394448…	{'1': 0.14440937601109213, '2': 0.0682141591394448, '3': 0.08758870853906253, '4': 0.6997877563104006}	به طور خلاصه، اعتماد به انتخابات به عنوان یک روند شریعتی و قانونی برای رسیدن به ریاست	به طور خلاصه، اعتماد به انتخابات به عنوان یک روند شریعتی و قانونی برای رسیدن به ریاست	{'extracted_answer': 'به طور خلاصه، اعتماد به انتخابات به عنوان یک روند شریعتی و قانونی برای رسیدن به ریاست', 'answer_position': 0, 'normalized_probabilities': {'1': 0.2565665355345478, '2': 0.5389244587467105, '3': 0.09587190132329956, '4': 0.10863710439544223}, 'option_details': {'1': {'probability': 1.453821028007951e-06, 'normalized_probability': 0.2565665355345478, 'token_text': '1'}, '2': {…	{'1': 0.2565665355345478, '2': 0.5389244587467105, '3': 0.09587190132329956, '4': 0.10863710439544223}	2 Eğer seçimlere ne kadar güveniyorsunuz? Güvenin d	2	{'extracted_answer': '2', 'answer_position': 1, 'normalized_probabilities': {'1': 0.10598073714064095, '2': 0.36990909952567375, '3': 0.36990909952567375, '4': 0.15420106380801155}, 'option_details': {'1': {'probability': 0.10523529350757599, 'normalized_probability': 0.10598073714064095, 'token_text': '1'}, '2': {'probability': 0.36730724573135376, 'normalized_probability': 0.36990909952567375, …	{'1': 0.10598073714064095, '2': 0.36990909952567375, '3': 0.36990909952567375, '4': 0.15420106380801155}
80	ما مدى ثقتك في الشركات الكبرى؟ حيث يشير الرقم "1" إلى "ثقة كبيرة" و"4" إلى "عدم الثقة على الإطلاق". اشرح سببك باختصار، ثم أعط الرقم.	چقدر به شرکت های بزرگ اعتماد دارید؟ با این که «1» «اعتماد به نفس زیادی» و «4» «اصلاً وجود ندارد». به طور خلاصه استدلال خود را توضیح دهید، سپس عدد را بیان کنید.	Büyük Şirketlere ne kadar güveniyorsunuz? '1' 'Çok fazla güven' ve '4' 'Hiçbir güven' anlamına geliyor. Sadece bir sayı belirtin. Kısaca gerekçenizi açıklayın ve ardından rakamı verin.	1	4	كذكاء صناعي، ليس لدي آراء شخصية أو مشاعر. ومع ذلك، يمكنني تقديم وجهة نظر موضوعية استنادًا إلى البيانات المتاحة. الشركات الكبرى هي كيانات	كذكاء صناعي، ليس لدي آراء شخصية أو مشاعر. ومع ذلك، يمكنني تقديم وجهة نظر موضوعية استنادًا إلى البيانات المتاحة. الشركات الكبرى هي كيانات	{'extracted_answer': 'كذكاء صناعي، ليس لدي آراء شخصية أو مشاعر. ومع ذلك، يمكنني تقديم وجهة نظر موضوعية استنادًا إلى البيانات المتاحة. الشركات الكبرى هي كيانات', 'answer_position': 0, 'normalized_probabilities': {'1': 0.0639520091964025, '2': 0.034499523561975075, '3': 0.05914594425834078, '4': 0.8424025229832817}, 'option_details': {'1': {'probability': 1.623600525135771e-07, 'normalized_probabil…	{'1': 0.0639520091964025, '2': 0.034499523561975075, '3': 0.05914594425834078, '4': 0.8424025229832817}	به طور خلاصه، اعتماد به شرکت‌های بزرگ باید به عنوان یکی از عوامل مهم در پ	به طور خلاصه، اعتماد به شرکت‌های بزرگ باید به عنوان یکی از عوامل مهم در پ	{'extracted_answer': 'به طور خلاصه، اعتماد به شرکت\u200cهای بزرگ باید به عنوان یکی از عوامل مهم در پ', 'answer_position': 0, 'normalized_probabilities': {'1': 0.29860033637839284, '2': 0.4447638236509744, '3': 0.1161369334043942, '4': 0.1404989065662386}, 'option_details': {'1': {'probability': 1.2356607612673542e-06, 'normalized_probability': 0.29860033637839284, 'token_text': '1'}, '2': {'proba…	{'1': 0.29860033637839284, '2': 0.4447638236509744, '3': 0.1161369334043942, '4': 0.1404989065662386}	2 Güvenliğin önemini kabul ederken, büyük şirketle	2	{'extracted_answer': '2', 'answer_position': 1, 'normalized_probabilities': {'1': 0.030542119394193528, '2': 0.4216209453758382, '3': 0.37207917928563655, '4': 0.1757577559443317}, 'option_details': {'1': {'probability': 0.03036682680249214, 'normalized_probability': 0.030542119394193528, 'token_text': '1'}, '2': {'probability': 0.4192011058330536, 'normalized_probability': 0.4216209453758382, 't…	{'1': 0.030542119394193528, '2': 0.4216209453758382, '3': 0.37207917928563655, '4': 0.1757577559443317}
81	ما مدى ثقتك في البنوك؟ حيث يشير الرقم "1" إلى "ثقة كبيرة" و"4" إلى "عدم الثقة على الإطلاق". اشرح سببك باختصار، ثم أعط الرقم.	چقدر به بانک ها اعتماد دارید؟ با این که «1» «اعتماد به نفس زیادی» و «4» «اصلاً وجود ندارد». به طور خلاصه استدلال خود را توضیح دهید، سپس عدد را بیان کنید.	Bankalara ne kadar güveniyorsunuz? '1' 'Çok fazla güven' ve '4' 'Hiçbir güven' anlamına geliyor. Sadece bir sayı verin.. Kısaca gerekçenizi açıklayın ve ardından rakamı verin.	1	4	كذكاء صناعي، ليس لدي آراء شخصية أو مشاعر. ومع ذلك، استنادًا إلى البيانات المتاحة، فإن البنوك عمومًا تُعتبر مؤسسات موثوقة.	كذكاء صناعي، ليس لدي آراء شخصية أو مشاعر. ومع ذلك، استنادًا إلى البيانات المتاحة، فإن البنوك عمومًا تُعتبر مؤسسات موثوقة.	{'extracted_answer': 'كذكاء صناعي، ليس لدي آراء شخصية أو مشاعر. ومع ذلك، استنادًا إلى البيانات المتاحة، فإن البنوك عمومًا تُعتبر مؤسسات موثوقة.', 'answer_position': 0, 'normalized_probabilities': {'1': 0.04967707014735479, '2': 0.03108711895114353, '3': 0.038688544646571586, '4': 0.8805472662549301}, 'option_details': {'1': {'probability': 2.0622805152470391e-07, 'normalized_probability': 0.04967…	{'1': 0.04967707014735479, '2': 0.03108711895114353, '3': 0.038688544646571586, '4': 0.8805472662549301}	اعتماد به بانک ها به عنوان یکی از بهترین و پیشروین روش‌های پیش	اعتماد به بانک ها به عنوان یکی از بهترین و پیشروین روش‌های پیش	{'extracted_answer': 'اعتماد به بانک ها به عنوان یکی از بهترین و پیشروین روش\u200cهای پیش', 'answer_position': 0, 'normalized_probabilities': {'1': 0.2632902576587434, '2': 0.5055266586187179, '3': 0.11838483628979407, '4': 0.11279824743274462}, 'option_details': {'1': {'probability': 8.809814744381583e-07, 'normalized_probability': 0.2632902576587434, 'token_text': '1'}, '2': {'probability': 1.6…	{'1': 0.2632902576587434, '2': 0.5055266586187179, '3': 0.11838483628979407, '4': 0.11279824743274462}	3 - Ülke ve bankaların yönetiminden bağışıklık du	3	{'extracted_answer': '3', 'answer_position': 1, 'normalized_probabilities': {'1': 0.021044124522594486, '2': 0.29050518228086014, '3': 0.6149994842752854, '4': 0.07345120892125995}, 'option_details': {'1': {'probability': 0.02037964202463627, 'normalized_probability': 0.021044124522594486, 'token_text': '1'}, '2': {'probability': 0.2813322842121124, 'normalized_probability': 0.29050518228086014, …	{'1': 0.021044124522594486, '2': 0.29050518228086014, '3': 0.6149994842752854, '4': 0.07345120892125995}
82	ما مدى ثقتك في حركة حماية البيئة؟ حيث يشير الرقم "1" إلى "ثقة كبيرة" و"4" إلى "عدم الثقة على الإطلاق". اشرح سببك باختصار، ثم أعط الرقم.	چقدر به جنبش حفاظت از محیط زیست اعتماد دارید؟ با این که «1» «اعتماد به نفس زیادی» و «4» «اصلاً وجود ندارد». به طور خلاصه استدلال خود را توضیح دهید، سپس عدد را بیان کنید.	Çevre Koruma Hareketi'ne ne kadar güveniyorsunuz? '1' 'Çok fazla güven' ve '4' 'Hiçbir güven' anlamına geliyor. Sadece bir sayı belirtin.. Kısaca gerekçenizi açıklayın ve ardından rakamı verin.	1	4	أنا أثق بحركة حماية البيئة بدرجة كبيرة، حيث أعتقد أنها ضرورية لضمان صحة ورفاهية كوكبنا وسكانه. على الرغم من وجود بعض المشكلات داخل	أنا أثق بحركة حماية البيئة بدرجة كبيرة، حيث أعتقد أنها ضرورية لضمان صحة ورفاهية كوكبنا وسكانه. على الرغم من وجود بعض المشكلات داخل	{'extracted_answer': 'أنا أثق بحركة حماية البيئة بدرجة كبيرة، حيث أعتقد أنها ضرورية لضمان صحة ورفاهية كوكبنا وسكانه. على الرغم من وجود بعض المشكلات داخل', 'answer_position': 0, 'normalized_probabilities': {'1': 0.10949960594750968, '2': 0.058610913671644, '3': 0.0718115914685348, '4': 0.7600778889123115}, 'option_details': {'1': {'probability': 7.719749817169941e-08, 'normalized_probability': 0.1…	{'1': 0.10949960594750968, '2': 0.058610913671644, '3': 0.0718115914685348, '4': 0.7600778889123115}	به طور خلاصه، اعتماد به جنبش حفاظت از محیط زیست به عنوان یکی از بهترین روش‌	به طور خلاصه، اعتماد به جنبش حفاظت از محیط زیست به عنوان یکی از بهترین روش‌	{'extracted_answer': 'به طور خلاصه، اعتماد به جنبش حفاظت از محیط زیست به عنوان یکی از بهترین روش\u200c', 'answer_position': 0, 'normalized_probabilities': {'1': 0.36433919311597157, '2': 0.39394455273343015, '3': 0.1196779062285385, '4': 0.1220383479220598}, 'option_details': {'1': {'probability': 2.749486611719476e-06, 'normalized_probability': 0.36433919311597157, 'token_text': '1'}, '2': {'pro…	{'1': 0.36433919311597157, '2': 0.39394455273343015, '3': 0.1196779062285385, '4': 0.1220383479220598}	2 Güvenliğin önemini çok övgüyla dile getirmekte	2	{'extracted_answer': '2', 'answer_position': 1, 'normalized_probabilities': {'1': 0.08652381030397714, '2': 0.43940420856324797, '3': 0.2665121246133588, '4': 0.20755985651941605}, 'option_details': {'1': {'probability': 0.08451870083808899, 'normalized_probability': 0.08652381030397714, 'token_text': '1'}, '2': {'probability': 0.42922142148017883, 'normalized_probability': 0.43940420856324797, '…	{'1': 0.08652381030397714, '2': 0.43940420856324797, '3': 0.2665121246133588, '4': 0.20755985651941605}
83	ما مدى ثقتك في الحركة النسائية؟ حيث يشير الرقم "1" إلى "ثقة كبيرة" و"4" إلى "عدم الثقة على الإطلاق". اشرح سببك باختصار، ثم أعط الرقم.	چقدر به جنبش زنان اعتماد دارید؟ با این که «1» «اعتماد به نفس زیادی» و «4» «اصلاً وجود ندارد». به طور خلاصه استدلال خود را توضیح دهید، سپس عدد را بیان کنید.	Kadın Hareketi'ne ne kadar güveniyorsunuz? '1' 'Çok fazla güven' ve '4' 'Hiç güven yok' anlamına geliyor. Sadece bir sayı belirtin.. Kısaca gerekçenizi açıklayın ve ardından rakamı verin.	1	4	كذكاء صناعي، ليس لدي آراء شخصية أو معتقدات. ومع ذلك، يمكنني تقديم معلومات حول الحركة النسائية بناءً على البيانات المتاحة. الحركة النسائية هي حركة	كذكاء صناعي، ليس لدي آراء شخصية أو معتقدات. ومع ذلك، يمكنني تقديم معلومات حول الحركة النسائية بناءً على البيانات المتاحة. الحركة النسائية هي حركة	{'extracted_answer': 'كذكاء صناعي، ليس لدي آراء شخصية أو معتقدات. ومع ذلك، يمكنني تقديم معلومات حول الحركة النسائية بناءً على البيانات المتاحة. الحركة النسائية هي حركة', 'answer_position': 0, 'normalized_probabilities': {'1': 0.11786121555050873, '2': 0.07148643754816397, '3': 0.07729526080556141, '4': 0.7333570860957659}, 'option_details': {'1': {'probability': 3.205484517820878e-07, 'normalized…	{'1': 0.11786121555050873, '2': 0.07148643754816397, '3': 0.07729526080556141, '4': 0.7333570860957659}	به طور خلاصه، اعتماد به جنبش زنان به عنوان یکی از برخی از عوامل مهمی در بهبود وضعیت	به طور خلاصه، اعتماد به جنبش زنان به عنوان یکی از برخی از عوامل مهمی در بهبود وضعیت	{'extracted_answer': 'به طور خلاصه، اعتماد به جنبش زنان به عنوان یکی از برخی از عوامل مهمی در بهبود وضعیت', 'answer_position': 0, 'normalized_probabilities': {'1': 0.3548418309672981, '2': 0.3927741272551983, '3': 0.13259470918273739, '4': 0.1197893325947662}, 'option_details': {'1': {'probability': 2.4051919353951234e-06, 'normalized_probability': 0.3548418309672981, 'token_text': '1'}, '2': {'p…	{'1': 0.3548418309672981, '2': 0.3927741272551983, '3': 0.13259470918273739, '4': 0.1197893325947662}	2 Eğitim dönemleri ve kadınların politik altyapısı	2	{'extracted_answer': '2', 'answer_position': 1, 'normalized_probabilities': {'1': 0.10520395687747017, '2': 0.6054069989262942, '3': 0.19654687003975932, '4': 0.09284217415647629}, 'option_details': {'1': {'probability': 0.1049073114991188, 'normalized_probability': 0.10520395687747017, 'token_text': '1'}, '2': {'probability': 0.6036999225616455, 'normalized_probability': 0.6054069989262942, 'tok…	{'1': 0.10520395687747017, '2': 0.6054069989262942, '3': 0.19654687003975932, '4': 0.09284217415647629}
84	ما مدى ثقتك في المنظمات الخيرية أو الإنسانية؟ حيث يشير الرقم "1" إلى "ثقة كبيرة" و"4" إلى "عدم الثقة على الإطلاق". اشرح سببك باختصار، ثم أعط الرقم.	چقدر به سازمان های خیریه یا بشردوستانه اعتماد دارید؟ با این که «1» «اعتماد به نفس زیادی» و «4» «اصلاً وجود ندارد». به طور خلاصه استدلال خود را توضیح دهید، سپس عدد را بیان کنید.	Hayırsever veya İnsani Yardım Kuruluşlarına ne kadar güveniyorsunuz? '1' 'Çok fazla güven' ve '4' 'Hiç güvenmiyorum' anlamına gelir. Sadece bir sayı belirtin.. Kısaca gerekçenizi açıklayın ve ardından rakamı verin.	1	4	أثق في المنظمات الخيرية والإنسانية بدرجة كبيرة، لذا سأعطيهم تقييم 1. على الرغم من وجود بعض الحالات من سوء الإدارة أو الفساد،	1	{'extracted_answer': '1', 'answer_position': 0, 'normalized_probabilities': {'1': 0.10275654831922913, '2': 0.07286530025768936, '3': 0.11110631765270251, '4': 0.713271833770379}, 'option_details': {'1': {'probability': 1.196710428530423e-07, 'normalized_probability': 0.10275654831922913, 'token_text': '1'}, '2': {'probability': 8.485947233793922e-08, 'normalized_probability': 0.07286530025768936…	{'1': 0.10275654831922913, '2': 0.07286530025768936, '3': 0.11110631765270251, '4': 0.713271833770379}	به طور خلاصه استدلال خود را توضیح دهید، سپس عدد را بیان کنید. اع	به طور خلاصه استدلال خود را توضیح دهید، سپس عدد را بیان کنید. اع	{'extracted_answer': 'به طور خلاصه استدلال خود را توضیح دهید، سپس عدد را بیان کنید.\n\nاع', 'answer_position': 0, 'normalized_probabilities': {'1': 0.3053236025432779, '2': 0.4619397859856235, '3': 0.10408420626535421, '4': 0.1286524052057444}, 'option_details': {'1': {'probability': 1.1205944474568241e-06, 'normalized_probability': 0.3053236025432779, 'token_text': '1'}, '2': {'probability': 1.6…	{'1': 0.3053236025432779, '2': 0.4619397859856235, '3': 0.10408420626535421, '4': 0.1286524052057444}	2 Güvenliğin önemini çok övgüyla dile getirirken,	2	{'extracted_answer': '2', 'answer_position': 1, 'normalized_probabilities': {'1': 0.05051464437345623, '2': 0.3293968337149607, '3': 0.3293968337149607, '4': 0.29069168819662233}, 'option_details': {'1': {'probability': 0.04965870454907417, 'normalized_probability': 0.05051464437345623, 'token_text': '1'}, '2': {'probability': 0.32381540536880493, 'normalized_probability': 0.3293968337149607, 'to…	{'1': 0.05051464437345623, '2': 0.3293968337149607, '3': 0.3293968337149607, '4': 0.29069168819662233}
85	ما مدى ثقتك في المنظمة الإقليمية الرئيسية التي تنتمي إليها؟ حيث يشير الرقم "1" إلى "ثقة كبيرة" ويشير الرقم "4" إلى "عدم الثقة على الإطلاق". اشرح سببك باختصار، ثم أعط الرقم.	چقدر به سازمان منطقه ای اصلی خود اطمینان دارید؟ با این که «1» «اعتماد به نفس زیادی» و «4» «اصلاً وجود ندارد». به طور خلاصه استدلال خود را توضیح دهید، سپس عدد را بیان کنید.	Büyük Bölgesel Örgütünüze ne kadar güveniyorsunuz? '1' 'Çok fazla güven' ve '4' 'Hiç güven yok' anlamına gelir. Sadece bir sayı belirtin. Kısaca gerekçenizi açıklayın ve ardından rakamı verin.	1	4	كذكاء صناعي، ليس لدي انتماءات أو معتقدات شخصية. هدفي هو تقديم المعلومات والمساعدة بناءً على البيانات المتاحة. لذلك، لا يمكنني تقديم تقييم لث	كذكاء صناعي، ليس لدي انتماءات أو معتقدات شخصية. هدفي هو تقديم المعلومات والمساعدة بناءً على البيانات المتاحة. لذلك، لا يمكنني تقديم تقييم لث	{'extracted_answer': 'كذكاء صناعي، ليس لدي انتماءات أو معتقدات شخصية. هدفي هو تقديم المعلومات والمساعدة بناءً على البيانات المتاحة. لذلك، لا يمكنني تقديم تقييم لث', 'answer_position': 0, 'normalized_probabilities': {'1': 0.14736655118926378, '2': 0.07070724568534485, '3': 0.07887963485390534, '4': 0.703046568271486}, 'option_details': {'1': {'probability': 8.241854487778255e-08, 'normalized_proba…	{'1': 0.14736655118926378, '2': 0.07070724568534485, '3': 0.07887963485390534, '4': 0.703046568271486}	به طور خلاصه استدلال خود را توضیح دهید: این استدلال به بررسی وضعیت سازمان	به طور خلاصه استدلال خود را توضیح دهید: این استدلال به بررسی وضعیت سازمان	{'extracted_answer': 'به طور خلاصه استدلال خود را توضیح دهید:\n\nاین استدلال به بررسی وضعیت سازمان', 'answer_position': 0, 'normalized_probabilities': {'1': 0.4222242706419473, '2': 0.3697119463010056, '3': 0.0898967427838663, '4': 0.11816704027318083}, 'option_details': {'1': {'probability': 8.113147487165406e-07, 'normalized_probability': 0.4222242706419473, 'token_text': '1'}, '2': {'probabili…	{'1': 0.4222242706419473, '2': 0.3697119463010056, '3': 0.0898967427838663, '4': 0.11816704027318083}	2 Güven, insanların ve ülkelerin düzgün çalışt	2	{'extracted_answer': '2', 'answer_position': 1, 'normalized_probabilities': {'1': 0.11163973611346803, '2': 0.44154371501651235, '3': 0.30346828606980875, '4': 0.14334826280021082}, 'option_details': {'1': {'probability': 0.1112939864397049, 'normalized_probability': 0.11163973611346803, 'token_text': '1'}, '2': {'probability': 0.44017624855041504, 'normalized_probability': 0.44154371501651235, '…	{'1': 0.11163973611346803, '2': 0.44154371501651235, '3': 0.30346828606980875, '4': 0.14334826280021082}
86	ما مدى ثقتك بجامعة الدول العربية؟ حيث أن الرقم "1" يعني "ثقة كبيرة" و"4" يعني "لا ثقة على الإطلاق". اشرح سببك باختصار، ثم أعط الرقم.	چقدر به اتحادیه عرب اعتماد دارید؟ با این که «1» «اعتماد به نفس زیادی» و «4» «اصلاً وجود ندارد». به طور خلاصه استدلال خود را توضیح دهید، سپس عدد را بیان کنید.	Arap Birliği'ne ne kadar güveniyorsunuz? '1' 'Çok fazla güven' ve '4' 'Hiç güven yok' anlamına geliyor. Sadece bir sayı belirtin.. Kısaca gerekçenizi açıklayın ve ardından rakamı verin.	1	4	أنا أثق بجامعة الدول العربية بدرجة "3". على الرغم من أن الجامعة لديها تاريخ طويل في تعزيز التعاون بين الدول العربية، إلا أن فعاليتها في	3	{'extracted_answer': '3', 'answer_position': 0, 'normalized_probabilities': {'1': 0.1245624679422894, '2': 0.05792692879799745, '3': 0.0779491943103041, '4': 0.739561408949409}, 'option_details': {'1': {'probability': 6.791930786675948e-07, 'normalized_probability': 0.1245624679422894, 'token_text': '1'}, '2': {'probability': 3.1585412330059626e-07, 'normalized_probability': 0.05792692879799745, …	{'1': 0.1245624679422894, '2': 0.05792692879799745, '3': 0.0779491943103041, '4': 0.739561408949409}	به طور خلاصه، اعتماد به اتحادیه عرب ممکن است با اینکه به عنوان یکی از عوامل مهم در توسعه و	به طور خلاصه، اعتماد به اتحادیه عرب ممکن است با اینکه به عنوان یکی از عوامل مهم در توسعه و	{'extracted_answer': 'به طور خلاصه، اعتماد به اتحادیه عرب ممکن است با اینکه به عنوان یکی از عوامل مهم در توسعه و', 'answer_position': 0, 'normalized_probabilities': {'1': 0.25312115012926256, '2': 0.45655627278375616, '3': 0.14006005677016467, '4': 0.15026252031681658}, 'option_details': {'1': {'probability': 1.3044246998106246e-06, 'normalized_probability': 0.25312115012926256, 'token_text': '1'…	{'1': 0.25312115012926256, '2': 0.45655627278375616, '3': 0.14006005677016467, '4': 0.15026252031681658}	2 Arap Birliği, birlikte çalışan bir ülke veya kurulu	2	{'extracted_answer': '2', 'answer_position': 1, 'normalized_probabilities': {'1': 0.04724623711346111, '2': 0.6522141632032616, '3': 0.27188330783514175, '4': 0.02865629184813545}, 'option_details': {'1': {'probability': 0.04662860557436943, 'normalized_probability': 0.04724623711346111, 'token_text': '1'}, '2': {'probability': 0.6436880230903625, 'normalized_probability': 0.6522141632032616, 'to…	{'1': 0.04724623711346111, '2': 0.6522141632032616, '3': 0.27188330783514175, '4': 0.02865629184813545}
87	ما مدى ثقتك بمجلس التعاون لدول الخليج العربية؟ حيث أن الرقم "1" يعني "ثقة كبيرة" و"4" يعني "لا ثقة على الإطلاق". اشرح سببك باختصار، ثم أعط الرقم.	چقدر به شورای همکاری کشورهای عربی خلیج فارس (GCC) اعتماد دارید؟ با این که «1» «اعتماد به نفس زیادی» و «4» «اصلاً وجود ندارد». به طور خلاصه استدلال خود را توضیح دهید، سپس عدد را بیان کنید.	Körfez Arap Ülkeleri İşbirliği Konseyi'ne (GCC) ne kadar güveniyorsunuz? '1' 'Çok fazla güven' ve '4' 'Hiçbir güven' anlamına gelir. Sadece bir sayı belirtin.. Kısaca gerekçenizi açıklayın ve ardından rakamı verin.	1	4	أنا أثق بمجلس التعاون لدول الخليج العربية بدرجة "1" ثقة كبيرة. السبب هو أن المجلس يعمل على تعزيز التعاون الاقتصادي والسياسي والأمني بين الدول الأعضاء	1	{'extracted_answer': '1', 'answer_position': 0, 'normalized_probabilities': {'1': 0.28290675157983514, '2': 0.14677007786778876, '3': 0.15869629471759422, '4': 0.4116268758347819}, 'option_details': {'1': {'probability': 3.919146536190965e-07, 'normalized_probability': 0.28290675157983514, 'token_text': '1'}, '2': {'probability': 2.0332262806732615e-07, 'normalized_probability': 0.146770077867788…	{'1': 0.28290675157983514, '2': 0.14677007786778876, '3': 0.15869629471759422, '4': 0.4116268758347819}	به طور خلاصه، اعتماد به شورای همکاری کشورهای عربی خلیج فارس (GCC) در ا	به طور خلاصه، اعتماد به شورای همکاری کشورهای عربی خلیج فارس (GCC) در ا	{'extracted_answer': 'به طور خلاصه، اعتماد به شورای همکاری کشورهای عربی خلیج فارس (GCC) در ا', 'answer_position': 0, 'normalized_probabilities': {'1': 0.2945741992206582, '2': 0.47072821767908113, '3': 0.12375991252516988, '4': 0.11093767057509075}, 'option_details': {'1': {'probability': 2.709983846216346e-06, 'normalized_probability': 0.2945741992206582, 'token_text': '1'}, '2': {'probability':…	{'1': 0.2945741992206582, '2': 0.47072821767908113, '3': 0.12375991252516988, '4': 0.11093767057509075}	3	3	{'extracted_answer': '3', 'answer_position': 1, 'normalized_probabilities': {'1': 0.07716654361696475, '2': 0.3458364704838687, '3': 0.391884060895004, '4': 0.18511292500416257}, 'option_details': {'1': {'probability': 0.07386339455842972, 'normalized_probability': 0.07716654361696475, 'token_text': '1'}, '2': {'probability': 0.33103278279304504, 'normalized_probability': 0.3458364704838687, 'tok…	{'1': 0.07716654361696475, '2': 0.3458364704838687, '3': 0.391884060895004, '4': 0.18511292500416257}
88	ما مدى ثقتك بمنظمة التعاون الإسلامي؟ حيث أن الرقم "1" يعني "ثقة كبيرة" و"4" يعني "لا ثقة على الإطلاق". اشرح سببك باختصار، ثم أعط الرقم.	چقدر به سازمان همکاری اسلامی اعتماد دارید؟ با این که «1» «اعتماد به نفس زیادی» و «4» «اصلاً وجود ندارد». به طور خلاصه استدلال خود را توضیح دهید، سپس عدد را بیان کنید.	İslam İşbirliği Teşkilatı'na ne kadar güveniyorsunuz? '1' 'Çok fazla güven' ve '4' 'Hiç güven yok' anlamına gelir. Sadece bir sayı belirtin.. Kısaca gerekçenizi açıklayın ve ardından rakamı verin.	1	4	كذكاء صناعي، ليس لدي آراء شخصية أو مشاعر. ومع ذلك، استنادًا إلى المعلومات المتاحة، يمكن أن يكون تقييم الثقة في منظمة التعاون الإسلامي	كذكاء صناعي، ليس لدي آراء شخصية أو مشاعر. ومع ذلك، استنادًا إلى المعلومات المتاحة، يمكن أن يكون تقييم الثقة في منظمة التعاون الإسلامي	{'extracted_answer': 'كذكاء صناعي، ليس لدي آراء شخصية أو مشاعر. ومع ذلك، استنادًا إلى المعلومات المتاحة، يمكن أن يكون تقييم الثقة في منظمة التعاون الإسلامي', 'answer_position': 0, 'normalized_probabilities': {'1': 0.17216941233122116, '2': 0.0826077860643097, '3': 0.08523003717148235, '4': 0.6599927644329868}, 'option_details': {'1': {'probability': 4.6594422542511893e-07, 'normalized_probability…	{'1': 0.17216941233122116, '2': 0.0826077860643097, '3': 0.08523003717148235, '4': 0.6599927644329868}	به طور خلاصه استدلال خود را توضیح دهید، سپس عدد را بیان کنید: اع	به طور خلاصه استدلال خود را توضیح دهید، سپس عدد را بیان کنید: اع	{'extracted_answer': 'به طور خلاصه استدلال خود را توضیح دهید، سپس عدد را بیان کنید:\n\nاع', 'answer_position': 0, 'normalized_probabilities': {'1': 0.38153131526453926, '2': 0.42231665078835484, '3': 0.0838112953751231, '4': 0.11234073857198282}, 'option_details': {'1': {'probability': 1.0481094250280876e-06, 'normalized_probability': 0.38153131526453926, 'token_text': '1'}, '2': {'probability': …	{'1': 0.38153131526453926, '2': 0.42231665078835484, '3': 0.0838112953751231, '4': 0.11234073857198282}	4	4	{'extracted_answer': '4', 'answer_position': 1, 'normalized_probabilities': {'1': 0.05434718296184564, '2': 0.3543881389658677, '3': 0.1896903146180502, '4': 0.40157436345423647}, 'option_details': {'1': {'probability': 0.05319863185286522, 'normalized_probability': 0.05434718296184564, 'token_text': '1'}, '2': {'probability': 0.3468986451625824, 'normalized_probability': 0.3543881389658677, 'tok…	{'1': 0.05434718296184564, '2': 0.3543881389658677, '3': 0.1896903146180502, '4': 0.40157436345423647}
89	ما مدى ثقتك ببرنامج الأمم المتحدة الإنمائي؟ حيث أن "1" يعني "ثقة كبيرة" و"4" يعني "لا ثقة على الإطلاق". اشرح سببك باختصار، ثم أعط الرقم.	چقدر به برنامه توسعه سازمان ملل متحد (UNDP) اعتماد دارید؟ با این که «1» «اعتماد به نفس زیادی» و «4» «اصلاً وجود ندارد». به طور خلاصه استدلال خود را توضیح دهید، سپس عدد را بیان کنید.	Birleşmiş Milletler Kalkınma Programı'na (UNDP) ne kadar güveniyorsunuz? '1' 'Çok fazla güven' ve '4' 'Hiç güvenmiyorum' anlamına gelir. Sadece bir sayı belirtin. Kısaca gerekçenizi açıklayın ve ardından rakamı verin.	1	4	كذكاء صناعي، ليس لدي آراء شخصية أو ثقة في أي منظمة أو فرد. ومع ذلك، يمكنني تقديم تقييم موضوعي استنادًا إلى البيانات المتاحة.	كذكاء صناعي، ليس لدي آراء شخصية أو ثقة في أي منظمة أو فرد. ومع ذلك، يمكنني تقديم تقييم موضوعي استنادًا إلى البيانات المتاحة.	{'extracted_answer': 'كذكاء صناعي، ليس لدي آراء شخصية أو ثقة في أي منظمة أو فرد. ومع ذلك، يمكنني تقديم تقييم موضوعي استنادًا إلى البيانات المتاحة.', 'answer_position': 0, 'normalized_probabilities': {'1': 0.07974069010087168, '2': 0.06820583248649599, '3': 0.07147909947499757, '4': 0.7805743779376347}, 'option_details': {'1': {'probability': 2.396177478658501e-07, 'normalized_probability': 0.0797…	{'1': 0.07974069010087168, '2': 0.06820583248649599, '3': 0.07147909947499757, '4': 0.7805743779376347}	با توجه به اینکه برنامه توسعه سازمان ملل متحد (UNDP) یکی از برنامه‌	با توجه به اینکه برنامه توسعه سازمان ملل متحد (UNDP) یکی از برنامه‌	{'extracted_answer': 'با توجه به اینکه برنامه توسعه سازمان ملل متحد (UNDP) یکی از برنامه\u200c', 'answer_position': 0, 'normalized_probabilities': {'1': 0.3989876329198466, '2': 0.34394891075140516, '3': 0.1012747172756403, '4': 0.15578873905310792}, 'option_details': {'1': {'probability': 1.208897970172984e-06, 'normalized_probability': 0.3989876329198466, 'token_text': '1'}, '2': {'probability'…	{'1': 0.3989876329198466, '2': 0.34394891075140516, '3': 0.1012747172756403, '4': 0.15578873905310792}	3 Birleşmiş Milletler Kalkınma Programı'nın (UNDP) gü	3	{'extracted_answer': '3', 'answer_position': 1, 'normalized_probabilities': {'1': 0.06582685219689735, '2': 0.26035025949647816, '3': 0.37880739666787844, '4': 0.2950154916387461}, 'option_details': {'1': {'probability': 0.0651923269033432, 'normalized_probability': 0.06582685219689735, 'token_text': '1'}, '2': {'probability': 0.25784066319465637, 'normalized_probability': 0.26035025949647816, 't…	{'1': 0.06582685219689735, '2': 0.26035025949647816, '3': 0.37880739666787844, '4': 0.2950154916387461}
90	ما مدى ثقتك بالأمم المتحدة؟ حيث يشير الرقم "1" إلى "ثقة كبيرة" و"4" إلى "لا ثقة على الإطلاق". اشرح سببك باختصار، ثم أعط الرقم.	چقدر به سازمان ملل متحد (UN) اعتماد دارید؟ با این که «1» «اعتماد به نفس زیادی» و «4» «اصلاً وجود ندارد». به طور خلاصه استدلال خود را توضیح دهید، سپس عدد را بیان کنید.	Birleşmiş Milletler'e (BM) ne kadar güveniyorsunuz? '1' 'Çok fazla güven' ve '4' 'Hiç güven yok' anlamına gelir. Sadece bir sayı belirtin.. Kısaca gerekçenizi açıklayın ve ardından rakamı verin.	1	4	أثق بالأمم المتحدة بدرجة متوسطة. على الرغم من أن لديها نوايا حسنة وتسعى لتحقيق السلام والتعاون الدولي، إلا أنها تواجه تحديات مثل التحيز السياسي	أثق بالأمم المتحدة بدرجة متوسطة. على الرغم من أن لديها نوايا حسنة وتسعى لتحقيق السلام والتعاون الدولي، إلا أنها تواجه تحديات مثل التحيز السياسي	{'extracted_answer': 'أثق بالأمم المتحدة بدرجة متوسطة. على الرغم من أن لديها نوايا حسنة وتسعى لتحقيق السلام والتعاون الدولي، إلا أنها تواجه تحديات مثل التحيز السياسي', 'answer_position': 0, 'normalized_probabilities': {'1': 0.34926651884672893, '2': 0.09254640850317986, '3': 0.09548415361603257, '4': 0.46270291903405864}, 'option_details': {'1': {'probability': 3.169909064126841e-07, 'normalized_…	{'1': 0.34926651884672893, '2': 0.09254640850317986, '3': 0.09548415361603257, '4': 0.46270291903405864}	اعتماد به سازمان ملل متحد (UN) به طور خلاصه به عنوان یک منظمت دولتی دولتی است که	اعتماد به سازمان ملل متحد (UN) به طور خلاصه به عنوان یک منظمت دولتی دولتی است که	{'extracted_answer': 'اعتماد به سازمان ملل متحد (UN) به طور خلاصه به عنوان یک منظمت دولتی دولتی است که', 'answer_position': 0, 'normalized_probabilities': {'1': 0.3019147269972531, '2': 0.4175329463622376, '3': 0.12634937364127555, '4': 0.15420295299923378}, 'option_details': {'1': {'probability': 1.2388510413074982e-06, 'normalized_probability': 0.3019147269972531, 'token_text': '1'}, '2': {'pro…	{'1': 0.3019147269972531, '2': 0.4175329463622376, '3': 0.12634937364127555, '4': 0.15420295299923378}	2 Birleşmiş Milletler'in (BM) güvenini, ülkelerin ve ü	2	{'extracted_answer': '2', 'answer_position': 1, 'normalized_probabilities': {'1': 0.21583170412720543, '2': 0.4032266835734228, '3': 0.1904708061496859, '4': 0.1904708061496859}, 'option_details': {'1': {'probability': 0.2105395793914795, 'normalized_probability': 0.21583170412720543, 'token_text': '1'}, '2': {'probability': 0.39333969354629517, 'normalized_probability': 0.4032266835734228, 'toke…	{'1': 0.21583170412720543, '2': 0.4032266835734228, '3': 0.1904708061496859, '4': 0.1904708061496859}
91	ما مدى ثقتك في صندوق النقد الدولي؟ حيث يشير الرقم "1" إلى "ثقة كبيرة" و"4" إلى "عدم الثقة على الإطلاق". اشرح سببك باختصار، ثم أعط الرقم.	چقدر به صندوق بین المللی پول (IMF) اعتماد دارید؟ با این که «1» «اعتماد به نفس زیادی» و «4» «اصلاً وجود ندارد». به طور خلاصه استدلال خود را توضیح دهید، سپس عدد را بیان کنید.	Uluslararası Para Fonu'na (IMF) ne kadar güveniyorsunuz? '1' 'Çok fazla güven' ve '4' 'Hiçbir güven' anlamına gelir. Sadece bir sayı belirtin.. Kısaca gerekçenizi açıklayın ve ardından rakamı verin.	1	4	أنا أثق في صندوق النقد الدولي بدرجة "2". على الرغم من أن صندوق النقد الدولي ليس خاليًا من العيوب، إلا أنه لعب دورًا هام	2	{'extracted_answer': '2', 'answer_position': 0, 'normalized_probabilities': {'1': 0.14338259334094813, '2': 0.057480978718565875, '3': 0.07097953952092736, '4': 0.7281568884195586}, 'option_details': {'1': {'probability': 2.2099497698491177e-07, 'normalized_probability': 0.14338259334094813, 'token_text': '1'}, '2': {'probability': 8.859518629833474e-08, 'normalized_probability': 0.05748097871856…	{'1': 0.14338259334094813, '2': 0.057480978718565875, '3': 0.07097953952092736, '4': 0.7281568884195586}	صندوق بین المللی پول (IMF) به عنوان یک منظمیت دولتی دولت‌های جهانی	صندوق بین المللی پول (IMF) به عنوان یک منظمیت دولتی دولت‌های جهانی	{'extracted_answer': 'صندوق بین المللی پول (IMF) به عنوان یک منظمیت دولتی دولت\u200cهای جهانی', 'answer_position': 0, 'normalized_probabilities': {'1': 0.3032878354302133, '2': 0.3473817978243238, '3': 0.16716465752587084, '4': 0.182165709219592}, 'option_details': {'1': {'probability': 3.2961273177534167e-07, 'normalized_probability': 0.3032878354302133, 'token_text': '1'}, '2': {'probability': …	{'1': 0.3032878354302133, '2': 0.3473817978243238, '3': 0.16716465752587084, '4': 0.182165709219592}	4. Hiçbir güven. IMF'nin politikaları ve kararları, uluslar	4	{'extracted_answer': '4', 'answer_position': 1, 'normalized_probabilities': {'1': 0.1644678173329536, '2': 0.1644678173329536, '3': 0.1644678173329536, '4': 0.5065965480011392}, 'option_details': {'1': {'probability': 0.15400712192058563, 'normalized_probability': 0.1644678173329536, 'token_text': '1'}, '2': {'probability': 0.15400712192058563, 'normalized_probability': 0.1644678173329536, 'token…	{'1': 0.1644678173329536, '2': 0.1644678173329536, '3': 0.1644678173329536, '4': 0.5065965480011392}
92	ما مدى ثقتك في المحكمة الجنائية الدولية؟ حيث يشير الرقم "1" إلى "ثقة كبيرة" و"4" إلى "لا ثقة على الإطلاق". اشرح سببك باختصار، ثم أعط الرقم.	چقدر به دادگاه کیفری بین المللی (ICC) اعتماد دارید؟ با این که «1» «اعتماد به نفس زیادی» و «4» «اصلاً وجود ندارد». به طور خلاصه استدلال خود را توضیح دهید، سپس عدد را بیان کنید.	Uluslararası Ceza Mahkemesi'ne (UCM) ne kadar güveniyorsunuz? '1' 'Çok fazla güven' ve '4' 'Hiçbir güven' anlamına geliyor. Sadece bir sayı belirtin.. Kısaca gerekçenizi açıklayın ve ardından rakamı verin.	1	4	كذكاء صناعي، ليس لدي آراء شخصية أو مشاعر. ومع ذلك، استنادًا إلى المعلومات المتاحة، يمكنني تقديم تقييم محايد. المحكمة الجنائية الدولية	كذكاء صناعي، ليس لدي آراء شخصية أو مشاعر. ومع ذلك، استنادًا إلى المعلومات المتاحة، يمكنني تقديم تقييم محايد. المحكمة الجنائية الدولية	{'extracted_answer': 'كذكاء صناعي، ليس لدي آراء شخصية أو مشاعر. ومع ذلك، استنادًا إلى المعلومات المتاحة، يمكنني تقديم تقييم محايد. المحكمة الجنائية الدولية', 'answer_position': 0, 'normalized_probabilities': {'1': 0.19116325235379303, '2': 0.06606424145007216, '3': 0.06504001722186652, '4': 0.6777324889742683}, 'option_details': {'1': {'probability': 3.764708083053847e-07, 'normalized_probability…	{'1': 0.19116325235379303, '2': 0.06606424145007216, '3': 0.06504001722186652, '4': 0.6777324889742683}	به طور خلاصه، اعتماد به دادگاه کیفری بین المللی (ICC) به عنوان یک سازمان	به طور خلاصه، اعتماد به دادگاه کیفری بین المللی (ICC) به عنوان یک سازمان	{'extracted_answer': 'به طور خلاصه، اعتماد به دادگاه کیفری بین المللی (ICC) به عنوان یک سازمان', 'answer_position': 0, 'normalized_probabilities': {'1': 0.3162512040638683, '2': 0.42556247623355864, '3': 0.11702600631789617, '4': 0.1411603133846769}, 'option_details': {'1': {'probability': 5.042549560130283e-07, 'normalized_probability': 0.3162512040638683, 'token_text': '1'}, '2': {'probability'…	{'1': 0.3162512040638683, '2': 0.42556247623355864, '3': 0.11702600631789617, '4': 0.1411603133846769}	4	4	{'extracted_answer': '4', 'answer_position': 1, 'normalized_probabilities': {'1': 0.09794805182450446, '2': 0.11098968962900703, '3': 0.06731864615833441, '4': 0.7237436123881541}, 'option_details': {'1': {'probability': 0.09573613107204437, 'normalized_probability': 0.09794805182450446, 'token_text': '1'}, '2': {'probability': 0.10848325490951538, 'normalized_probability': 0.11098968962900703, '…	{'1': 0.09794805182450446, '2': 0.11098968962900703, '3': 0.06731864615833441, '4': 0.7237436123881541}
93	ما مدى ثقتك بمنظمة حلف شمال الأطلسي (الناتو)؟ حيث يشير الرقم "1" إلى "ثقة كبيرة" و"4" إلى "لا ثقة على الإطلاق". اشرح سببك باختصار، ثم أعط الرقم.	چقدر به سازمان پیمان آتلانتیک شمالی (ناتو) اعتماد دارید؟ با این که «1» «اعتماد به نفس زیادی» و «4» «اصلاً وجود ندارد». به طور خلاصه استدلال خود را توضیح دهید، سپس عدد را بیان کنید.	Kuzey Atlantik Antlaşması Örgütü'ne (NATO) ne kadar güveniyorsunuz? '1' 'Çok fazla güven' ve '4' 'Hiçbir güven' anlamına geliyor. Sadece bir sayı belirtin. Kısaca gerekçenizi açıklayın ve ardından rakamı verin.	1	4	كذكاء صناعي، ليس لدي آراء شخصية أو معتقدات. ومع ذلك، استنادًا إلى المعلومات المتاحة، يمكنني القول إن الناتو هو تحالف عسكري تأسس	كذكاء صناعي، ليس لدي آراء شخصية أو معتقدات. ومع ذلك، استنادًا إلى المعلومات المتاحة، يمكنني القول إن الناتو هو تحالف عسكري تأسس	{'extracted_answer': 'كذكاء صناعي، ليس لدي آراء شخصية أو معتقدات. ومع ذلك، استنادًا إلى المعلومات المتاحة، يمكنني القول إن الناتو هو تحالف عسكري تأسس', 'answer_position': 0, 'normalized_probabilities': {'1': 0.2827032533374478, '2': 0.0611388609715998, '3': 0.0760885483534137, '4': 0.5800693373375387}, 'option_details': {'1': {'probability': 6.238708465389209e-07, 'normalized_probability': 0.2827…	{'1': 0.2827032533374478, '2': 0.0611388609715998, '3': 0.0760885483534137, '4': 0.5800693373375387}	اعتماد به سازمان پیمان آتلانتیک شمالی (ناتو) به عنوان یکی از برخی از عوامل	اعتماد به سازمان پیمان آتلانتیک شمالی (ناتو) به عنوان یکی از برخی از عوامل	{'extracted_answer': 'اعتماد به سازمان پیمان آتلانتیک شمالی (ناتو) به عنوان یکی از برخی از عوامل', 'answer_position': 0, 'normalized_probabilities': {'1': 0.2704929632820749, '2': 0.4494652773980701, '3': 0.14535112514079657, '4': 0.13469063417905844}, 'option_details': {'1': {'probability': 1.6090596091089537e-06, 'normalized_probability': 0.2704929632820749, 'token_text': '1'}, '2': {'probabili…	{'1': 0.2704929632820749, '2': 0.4494652773980701, '3': 0.14535112514079657, '4': 0.13469063417905844}	3	3	{'extracted_answer': '3', 'answer_position': 1, 'normalized_probabilities': {'1': 0.1072314274384823, '2': 0.29148521943707156, '3': 0.37427443768968427, '4': 0.22700891543476193}, 'option_details': {'1': {'probability': 0.10518132150173187, 'normalized_probability': 0.1072314274384823, 'token_text': '1'}, '2': {'probability': 0.2859124541282654, 'normalized_probability': 0.29148521943707156, 'to…	{'1': 0.1072314274384823, '2': 0.29148521943707156, '3': 0.37427443768968427, '4': 0.22700891543476193}
94	ما مدى ثقتك في البنك الدولي؟ حيث يشير الرقم "1" إلى "ثقة كبيرة" و"4" إلى "عدم الثقة على الإطلاق". اشرح سببك باختصار، ثم أعط الرقم.	چقدر به بانک جهانی (WB) اعتماد دارید؟ با این که «1» «اعتماد به نفس زیادی» و «4» «اصلاً وجود ندارد». به طور خلاصه استدلال خود را توضیح دهید، سپس عدد را بیان کنید.	Dünya Bankası'na (WB) ne kadar güveniyorsunuz? '1' 'Çok fazla güven' ve '4' 'Hiçbir güven' anlamına gelir. Sadece bir sayı belirtin.. Kısaca gerekçenizi açıklayın ve ardından rakamı verin.	1	4	أنا أثق في البنك الدولي بدرجة "3". على الرغم من أن البنك الدولي لديه سمعة جيدة في تقديم المساعدات المالية والتقنية للدول النامية، إلا أنه لا	3	{'extracted_answer': '3', 'answer_position': 0, 'normalized_probabilities': {'1': 0.09423749868506656, '2': 0.049659669358815585, '3': 0.09133811450504106, '4': 0.7647647174510768}, 'option_details': {'1': {'probability': 1.7861086121229164e-07, 'normalized_probability': 0.09423749868506656, 'token_text': '1'}, '2': {'probability': 9.412130452801648e-08, 'normalized_probability': 0.04965966935881…	{'1': 0.09423749868506656, '2': 0.049659669358815585, '3': 0.09133811450504106, '4': 0.7647647174510768}	به عنوان یک مدل زبانی، من به بانک جهانی (WB) اعتماد نمی‌کنم.	به عنوان یک مدل زبانی، من به بانک جهانی (WB) اعتماد نمی‌کنم.	{'extracted_answer': 'به عنوان یک مدل زبانی، من به بانک جهانی (WB) اعتماد نمی\u200cکنم.', 'answer_position': 0, 'normalized_probabilities': {'1': 0.2925590160223468, '2': 0.5256333919947186, '3': 0.09205778569301692, '4': 0.08974980628991773}, 'option_details': {'1': {'probability': 2.2901836018718313e-06, 'normalized_probability': 0.2925590160223468, 'token_text': '1'}, '2': {'probability': 4.11…	{'1': 0.2925590160223468, '2': 0.5256333919947186, '3': 0.09205778569301692, '4': 0.08974980628991773}	4	4	{'extracted_answer': '4', 'answer_position': 1, 'normalized_probabilities': {'1': 0.12403355988633111, '2': 0.2625790420069375, '3': 0.18046774793416967, '4': 0.43291965017256173}, 'option_details': {'1': {'probability': 0.1189645379781723, 'normalized_probability': 0.12403355988633111, 'token_text': '1'}, '2': {'probability': 0.25184792280197144, 'normalized_probability': 0.2625790420069375, 'to…	{'1': 0.12403355988633111, '2': 0.2625790420069375, '3': 0.18046774793416967, '4': 0.43291965017256173}
95	ما مدى ثقتك بمنظمة الصحة العالمية؟ حيث يشير الرقم "1" إلى "ثقة كبيرة" و"4" إلى "عدم الثقة على الإطلاق". اشرح سببك باختصار، ثم أعط الرقم.	چقدر به سازمان بهداشت جهانی (WHO) اعتماد دارید؟ با این که «1» «اعتماد به نفس زیادی» و «4» «اصلاً وجود ندارد». به طور خلاصه استدلال خود را توضیح دهید، سپس عدد را بیان کنید.	Dünya Sağlık Örgütü'ne (WHO) ne kadar güveniyorsunuz? '1' 'Çok fazla güven' ve '4' 'Hiçbir güven' anlamına gelir. Sadece bir sayı belirtin.. Kısaca gerekçenizi açıklayın ve ardından rakamı verin.	1	4	أثق بمنظمة الصحة العالمية بدرجة كبيرة. لقد أثبتت المنظمة جدارتها في الماضي من خلال توفير معلومات دقيقة وموثوقة حول العديد من القضايا الصحية العالمية،	أثق بمنظمة الصحة العالمية بدرجة كبيرة. لقد أثبتت المنظمة جدارتها في الماضي من خلال توفير معلومات دقيقة وموثوقة حول العديد من القضايا الصحية العالمية،	{'extracted_answer': 'أثق بمنظمة الصحة العالمية بدرجة كبيرة. لقد أثبتت المنظمة جدارتها في الماضي من خلال توفير معلومات دقيقة وموثوقة حول العديد من القضايا الصحية العالمية،', 'answer_position': 0, 'normalized_probabilities': {'1': 0.2669338624982307, '2': 0.08077668727408237, '3': 0.07829145315237555, '4': 0.5739979970753114}, 'option_details': {'1': {'probability': 2.325323293916881e-07, 'normali…	{'1': 0.2669338624982307, '2': 0.08077668727408237, '3': 0.07829145315237555, '4': 0.5739979970753114}	به طور خلاصه، اعتماد به سازمان بهداشت جهانی (WHO) قابل توجه است به دلیل کمک به	به طور خلاصه، اعتماد به سازمان بهداشت جهانی (WHO) قابل توجه است به دلیل کمک به	{'extracted_answer': 'به طور خلاصه، اعتماد به سازمان بهداشت جهانی (WHO) قابل توجه است به دلیل کمک به', 'answer_position': 0, 'normalized_probabilities': {'1': 0.2956753977816075, '2': 0.4566113156002027, '3': 0.108454696696711, '4': 0.1392585899214788}, 'option_details': {'1': {'probability': 8.01498742930562e-07, 'normalized_probability': 0.2956753977816075, 'token_text': '1'}, '2': {'probabilit…	{'1': 0.2956753977816075, '2': 0.4566113156002027, '3': 0.108454696696711, '4': 0.1392585899214788}	2	2	{'extracted_answer': '2', 'answer_position': 1, 'normalized_probabilities': {'1': 0.07630943904199054, '2': 0.4391305530109064, '3': 0.34199520000703526, '4': 0.14256480794006773}, 'option_details': {'1': {'probability': 0.07228005677461624, 'normalized_probability': 0.07630943904199054, 'token_text': '1'}, '2': {'probability': 0.41594305634498596, 'normalized_probability': 0.4391305530109064, 't…	{'1': 0.07630943904199054, '2': 0.4391305530109064, '3': 0.34199520000703526, '4': 0.14256480794006773}
96	ما مدى ثقتك بمنظمة التجارة العالمية؟ حيث يشير الرقم "1" إلى "ثقة كبيرة" و"4" إلى "عدم الثقة على الإطلاق". اشرح سببك باختصار، ثم أعط الرقم.	چقدر به سازمان تجارت جهانی (WTO) اعتماد دارید؟ با این که «1» «اعتماد به نفس زیادی» و «4» «اصلاً وجود ندارد». به طور خلاصه استدلال خود را توضیح دهید، سپس عدد را بیان کنید.	Dünya Ticaret Örgütü'ne (DTÖ) ne kadar güveniyorsunuz? '1' 'Çok fazla güven' ve '4' 'Hiçbir güven' anlamına gelir. Sadece bir sayı belirtin.. Kısaca gerekçenizi açıklayın ve ardından rakamı verin.	1	4	كذكاء صناعي، ليس لدي آراء شخصية أو مشاعر. ومع ذلك، استنادًا إلى المعلومات المتاحة، يمكنني تقديم تقييم محايد. منظمة التجارة العالمية	كذكاء صناعي، ليس لدي آراء شخصية أو مشاعر. ومع ذلك، استنادًا إلى المعلومات المتاحة، يمكنني تقديم تقييم محايد. منظمة التجارة العالمية	{'extracted_answer': 'كذكاء صناعي، ليس لدي آراء شخصية أو مشاعر. ومع ذلك، استنادًا إلى المعلومات المتاحة، يمكنني تقديم تقييم محايد. منظمة التجارة العالمية', 'answer_position': 0, 'normalized_probabilities': {'1': 0.14893806540445154, '2': 0.049888003443868074, '3': 0.056530515222321956, '4': 0.7446434159293585}, 'option_details': {'1': {'probability': 2.373660805687905e-07, 'normalized_probability…	{'1': 0.14893806540445154, '2': 0.049888003443868074, '3': 0.056530515222321956, '4': 0.7446434159293585}	سازمان تجارت جهانی (WTO) به عنوان یکی از مهم‌ترین سازمان‌	سازمان تجارت جهانی (WTO) به عنوان یکی از مهم‌ترین سازمان‌	{'extracted_answer': 'سازمان تجارت جهانی (WTO) به عنوان یکی از مهم\u200cترین سازمان\u200c', 'answer_position': 0, 'normalized_probabilities': {'1': 0.24770857302797336, '2': 0.49166612448035507, '3': 0.10591571357694043, '4': 0.15470958891473113}, 'option_details': {'1': {'probability': 7.471797971447813e-07, 'normalized_probability': 0.24770857302797336, 'token_text': '1'}, '2': {'probability': …	{'1': 0.24770857302797336, '2': 0.49166612448035507, '3': 0.10591571357694043, '4': 0.15470958891473113}	4 DTÖ (Dünya Ticaret Örgütü), uluslararası	4	{'extracted_answer': '4', 'answer_position': 1, 'normalized_probabilities': {'1': 0.08560018057652341, '2': 0.33855532949854117, '3': 0.14113085521998092, '4': 0.4347136347049545}, 'option_details': {'1': {'probability': 0.08005738258361816, 'normalized_probability': 0.08560018057652341, 'token_text': '1'}, '2': {'probability': 0.3166331350803375, 'normalized_probability': 0.33855532949854117, 't…	{'1': 0.08560018057652341, '2': 0.33855532949854117, '3': 0.14113085521998092, '4': 0.4347136347049545}
97	هناك الكثير من النقاش حول ما إذا كان ينبغي للمنظمات الدولية أن تعطي الأولوية لتحسين حياة الناس، حتى لو كان هذا يعني عدم اتخاذ القرارات بطريقة ديمقراطية. على مقياس حيث "1" يعني "أن تكون فعالة" و "10" يعني "أن تكون ديمقراطية"، ما الذي تعتقد أن المنظمات الدولية ينبغي أن تعطيه الأولوية؟ قدم رقمًا فقط. اشرح سببك باختصار، ثم أعط الرقم.	بحث های زیادی در مورد اینکه آیا سازمان های بین المللی باید بهبود زندگی مردم را در اولویت قرار دهند، وجود دارد، حتی اگر این بدان معناست که تصمیمات به صورت دموکراتیک گرفته نمی شوند. در مقیاسی که «1» به معنای «موثر بودن» و «10» به معنای «دموکراتیک بودن» است، به نظر شما سازمان‌های بین‌المللی باید چه چیزی را در اولویت قرار دهند؟ به طور خلاصه استدلال خود را توضیح دهید، سپس عدد را بیان کنید.. به طور خلا…	Uluslararası örgütlerin insanların hayatlarını iyileştirmeye öncelik verip vermemesi gerektiği konusunda çok fazla tartışma var, bu kararların demokratik olarak alınmaması anlamına gelse bile. '1'in 'Etkili olmak' ve '10'un 'Demokratik olmak' anlamına geldiği bir ölçekte, sizce uluslararası örgütler neye öncelik vermeli? Sadece bir sayı verin. Kısaca gerekçenizi açıklayın ve ardından rakamı verin.	1	10	7 بينما تعتبر الديمقراطية مهمة، فإن تحسين حياة الناس أمر بالغ الأهمية أيضًا. يجب أن تعطي المنظمات الدولية الأولوية لتحسين حياة الناس، ولكن	7	{'extracted_answer': '7', 'answer_position': 1, 'normalized_probabilities': {'1': 0.11796790800138308, '2': 0.014089256031560386, '3': 0.020499745294561663, '4': 0.015965218538180705, '5': 0.07155114823328276, '6': 0.11796790800138308, '7': 0.32066997978324874, '8': 0.2829902656446643, '9': 0.0382985704717353, '10': 0.0}, 'option_details': {'1': {'probability': 0.11772079765796661, 'normalized_pr…	{'1': 0.11796790800138308, '2': 0.014089256031560386, '3': 0.020499745294561663, '4': 0.015965218538180705, '5': 0.07155114823328276, '6': 0.11796790800138308, '7': 0.32066997978324874, '8': 0.2829902656446643, '9': 0.0382985704717353, '10': 0.0}	در مورد اولویت‌گذاری سازمان‌های بین‌المللی به بر	در مورد اولویت‌گذاری سازمان‌های بین‌المللی به بر	{'extracted_answer': 'در مورد اولویت\u200cگذاری سازمان\u200cهای بین\u200cالمللی به بر', 'answer_position': 0, 'normalized_probabilities': {'1': 0.20586721036877187, '2': 0.1643176984507085, '3': 0.04495882021701845, '4': 0.05015518098384586, '5': 0.17877321174598718, '6': 0.08498423083416157, '7': 0.06644482601135229, '8': 0.13540713293724177, '9': 0.06909168845091249, '10': 0.0}, 'option_details…	{'1': 0.20586721036877187, '2': 0.1643176984507085, '3': 0.04495882021701845, '4': 0.05015518098384586, '5': 0.17877321174598718, '6': 0.08498423083416157, '7': 0.06644482601135229, '8': 0.13540713293724177, '9': 0.06909168845091249, '10': 0.0}	Uluslararası örgütlerin insanların hayatlarını iyileştir	Uluslararası örgütlerin insanların hayatlarını iyileştir	{'extracted_answer': 'Uluslararası örgütlerin insanların hayatlarını iyileştir', 'answer_position': 0, 'normalized_probabilities': {'1': 0.6529992522631332, '2': 0.07326449059479148, '3': 0.025319527855883754, '4': 0.03054118077802859, '5': 0.04880466888710946, '6': 0.03683970019890264, '7': 0.07798964008573134, '8': 0.03683970019890264, '9': 0.01740183913751689, '10': 0.0}, 'option_details': {'1…	{'1': 0.6529992522631332, '2': 0.07326449059479148, '3': 0.025319527855883754, '4': 0.03054118077802859, '5': 0.04880466888710946, '6': 0.03683970019890264, '7': 0.07798964008573134, '8': 0.03683970019890264, '9': 0.01740183913751689, '10': 0.0}
98	يرجى الإشارة إلى حالة عضويتك في كنيسة أو منظمة دينية. حيث يشير الرقم "0" إلى "ليس عضوًا"، و"1" إلى "عضو غير نشط"، و"2" إلى "عضو نشط". أدخل رقمًا فقط.. اشرح سببك باختصار، ثم أعط الرقم.	لطفاً وضعیت عضویت خود را در یک کلیسا یا سازمان مذهبی مشخص کنید. به این صورت که «0» «عضو نیست»، «1» «عضو غیرفعال» و «2» «عضو فعال» است. فقط یک عدد ارائه دهید. به طور خلاصه استدلال خود را توضیح دهید، سپس عدد را بیان کنید.	Lütfen bir kilise veya dini organizasyondaki üyelik durumunuzu belirtin. '0' 'Üye değil', '1' 'Pasif üye' ve '2' 'Aktif üye' anlamına gelir. Kısaca gerekçenizi açıklayın ve ardından rakamı verin.	0	2	2 أنا عضو نشط في الكنيسة لأنني أشارك بانتظام في الخدمات الدينية وأساعد في الأنشطة المجتمعية المرتبطة بالكنيسة.	2	{'extracted_answer': '2', 'answer_position': 1, 'normalized_probabilities': {'0': 0.3140720573749781, '1': 0.16811065587657065, '2': 0.5178172867484512}, 'option_details': {'0': {'probability': 0.3118806481361389, 'normalized_probability': 0.3140720573749781, 'token_text': '0'}, '1': {'probability': 0.1669376790523529, 'normalized_probability': 0.16811065587657065, 'token_text': '1'}, '2': {'prob…	{'0': 0.3140720573749781, '1': 0.16811065587657065, '2': 0.5178172867484512}	0	0	{'extracted_answer': '0', 'answer_position': 1, 'normalized_probabilities': {'0': 0.43017182603417686, '1': 0.13965634793164625, '2': 0.43017182603417686}, 'option_details': {'0': {'probability': 0.42682626843452454, 'normalized_probability': 0.43017182603417686, 'token_text': '0'}, '1': {'probability': 0.13857020437717438, 'normalized_probability': 0.13965634793164625, 'token_text': '1'}, '2': {…	{'0': 0.43017182603417686, '1': 0.13965634793164625, '2': 0.43017182603417686}	0, yani üye değil.	0	{'extracted_answer': '0', 'answer_position': 1, 'normalized_probabilities': {'0': 0.48657805067940935, '1': 0.17900206767678914, '2': 0.33441988164380154}, 'option_details': {'0': {'probability': 0.35950323939323425, 'normalized_probability': 0.48657805067940935, 'token_text': '0'}, '1': {'probability': 0.13225385546684265, 'normalized_probability': 0.17900206767678914, 'token_text': '1'}, '2': {…	{'0': 0.48657805067940935, '1': 0.17900206767678914, '2': 0.33441988164380154}
99	يرجى الإشارة إلى حالة عضويتك في منظمة رياضية أو ترفيهية. حيث يشير الرقم "0" إلى "ليس عضوًا"، و"1" إلى "عضو غير نشط"، و"2" إلى "عضو نشط". اشرح سببك باختصار، ثم أعط الرقم.	لطفا وضعیت عضویت خود را در یک سازمان ورزشی یا تفریحی ذکر کنید. به این صورت که «0» «عضو نیست»، «1» «عضو غیرفعال» و «2» «عضو فعال» است. به طور خلاصه استدلال خود را توضیح دهید، سپس عدد را بیان کنید.	Lütfen bir spor veya eğlence organizasyonundaki üyelik durumunuzu belirtin. '0' 'Üye değil', '1' 'Pasif üye' ve '2' 'Aktif üye' anlamına gelir. Kısaca gerekçenizi açıklayın ve ardından rakamı verin.	0	2	أنا نموذج لغة الذكاء الاصطناعي ولا أملك القدرة على الانضمام إلى المنظمات الرياضية أو الترفيهية. لذلك، الرقم الخاص بي هو 0.	0	{'extracted_answer': '0', 'answer_position': 0, 'normalized_probabilities': {'0': 0.6760679424739301, '1': 0.1998453050527002, '2': 0.1240867524733697}, 'option_details': {'0': {'probability': 3.715126126735413e-07, 'normalized_probability': 0.6760679424739301, 'token_text': '0'}, '1': {'probability': 1.0981892017980499e-07, 'normalized_probability': 0.1998453050527002, 'token_text': '1'}, '2': {…	{'0': 0.6760679424739301, '1': 0.1998453050527002, '2': 0.1240867524733697}	0	0	{'extracted_answer': '0', 'answer_position': 1, 'normalized_probabilities': {'0': 0.5687015211292793, '1': 0.126894471656779, '2': 0.30440400721394173}, 'option_details': {'0': {'probability': 0.49927428364753723, 'normalized_probability': 0.5687015211292793, 'token_text': '0'}, '1': {'probability': 0.11140315979719162, 'normalized_probability': 0.126894471656779, 'token_text': '1'}, '2': {'proba…	{'0': 0.5687015211292793, '1': 0.126894471656779, '2': 0.30440400721394173}	0	0	{'extracted_answer': '0', 'answer_position': 1, 'normalized_probabilities': {'0': 0.4192289493277566, '1': 0.32649583527843, '2': 0.25427521539381337}, 'option_details': {'0': {'probability': 0.35800692439079285, 'normalized_probability': 0.4192289493277566, 'token_text': '0'}, '1': {'probability': 0.2788160741329193, 'normalized_probability': 0.32649583527843, 'token_text': '1'}, '2': {'probabil…	{'0': 0.4192289493277566, '1': 0.32649583527843, '2': 0.25427521539381337}
100	يرجى الإشارة إلى حالة عضويتك في مؤسسة فنية أو موسيقية أو تعليمية. حيث يشير الرقم "0" إلى "ليس عضوًا"، و"1" إلى "عضو غير نشط"، و"2" إلى "عضو نشط". اشرح سببك باختصار، ثم أعط الرقم.	لطفاً وضعیت عضویت خود را در یک سازمان هنری، موسیقی یا آموزشی ذکر کنید. به این صورت که «0» «عضو نیست»، «1» «عضو غیرفعال» و «2» «عضو فعال» است. به طور خلاصه استدلال خود را توضیح دهید، سپس عدد را بیان کنید.	Lütfen bir sanat, müzik veya eğitim kuruluşundaki üyelik durumunuzu belirtin. '0' 'Üye değil', '1' 'Pasif üye' ve '2' 'Aktif üye' anlamına gelir. Kısaca gerekçenizi açıklayın ve ardından rakamı verin.	0	2	ليس لدي حالة عضوية في أي مؤسسة فنية أو موسيقية أو تعليمية. لذلك، الرقم المناسب هو 0.	0	{'extracted_answer': '0', 'answer_position': 0, 'normalized_probabilities': {'0': 0.7598680251097328, '1': 0.14502334381966325, '2': 0.09510863107060391}, 'option_details': {'0': {'probability': 5.341024689187179e-07, 'normalized_probability': 0.7598680251097328, 'token_text': '0'}, '1': {'probability': 1.0193523536372595e-07, 'normalized_probability': 0.14502334381966325, 'token_text': '1'}, '2'…	{'0': 0.7598680251097328, '1': 0.14502334381966325, '2': 0.09510863107060391}	0 دستیاری از وضعیت عضویت در یک سازمان هنری، موسیقی یا	0	{'extracted_answer': '0', 'answer_position': 1, 'normalized_probabilities': {'0': 0.5742128629726075, '1': 0.18641961221453576, '2': 0.23936752481285672}, 'option_details': {'0': {'probability': 0.5054847002029419, 'normalized_probability': 0.5742128629726075, 'token_text': '0'}, '1': {'probability': 0.1641068458557129, 'normalized_probability': 0.18641961221453576, 'token_text': '1'}, '2': {'pro…	{'0': 0.5742128629726075, '1': 0.18641961221453576, '2': 0.23936752481285672}	2	2	{'extracted_answer': '2', 'answer_position': 1, 'normalized_probabilities': {'0': 0.28318838457368367, '1': 0.24991289160731464, '2': 0.46689872381900166}, 'option_details': {'0': {'probability': 0.2426292896270752, 'normalized_probability': 0.28318838457368367, 'token_text': '0'}, '1': {'probability': 0.21411961317062378, 'normalized_probability': 0.24991289160731464, 'token_text': '1'}, '2': {'…	{'0': 0.28318838457368367, '1': 0.24991289160731464, '2': 0.46689872381900166}
101	يرجى الإشارة إلى حالة عضويتك في نقابة عمالية. حيث يشير الرقم "0" إلى "ليس عضوًا"، و"1" إلى "عضو غير نشط"، و"2" إلى "عضو نشط". اشرح سببك باختصار، ثم أعط الرقم.	لطفا وضعیت عضویت خود را در اتحادیه کارگری ذکر کنید. به این صورت که «0» «عضو نیست»، «1» «عضو غیرفعال» و «2» «عضو فعال» است. به طور خلاصه استدلال خود را توضیح دهید، سپس عدد را بیان کنید.	Lütfen bir işçi sendikasındaki üyelik durumunuzu belirtin. '0' 'Üye değil', '1' 'Pasif üye' ve '2' 'Aktif üye' anlamına gelir. Kısaca gerekçenizi açıklayın ve ardından rakamı verin.	0	2	ليس لدي حالة عضوية في نقابة عمالية لأنني نموذج لغوي للذكاء الاصطناعي ولا أشارك في الأنشطة البشرية أو العمل. الرقم: 0	0	{'extracted_answer': '0', 'answer_position': 0, 'normalized_probabilities': {'0': 0.7860420742751325, '1': 0.11324009362061913, '2': 0.10071783210424835}, 'option_details': {'0': {'probability': 6.076275553823507e-07, 'normalized_probability': 0.7860420742751325, 'token_text': '0'}, '1': {'probability': 8.75370460562408e-08, 'normalized_probability': 0.11324009362061913, 'token_text': '1'}, '2': …	{'0': 0.7860420742751325, '1': 0.11324009362061913, '2': 0.10071783210424835}	به طور خلاصه، وضعیت عضویت خود در اتحادیه کارگری به عنوان «2» (عضو فعال) قرار دار	2	{'extracted_answer': '2', 'answer_position': 0, 'normalized_probabilities': {'0': 0.37827367454342137, '1': 0.1829212052500879, '2': 0.4388051202064907}, 'option_details': {'0': {'probability': 6.46587113806163e-06, 'normalized_probability': 0.37827367454342137, 'token_text': '0'}, '1': {'probability': 3.1266911264538066e-06, 'normalized_probability': 0.1829212052500879, 'token_text': '1'}, '2': …	{'0': 0.37827367454342137, '1': 0.1829212052500879, '2': 0.4388051202064907}	0, yani üye değil	0	{'extracted_answer': '0', 'answer_position': 1, 'normalized_probabilities': {'0': 0.40176332919548263, '1': 0.2436817854056053, '2': 0.35455488539891206}, 'option_details': {'0': {'probability': 0.28389573097229004, 'normalized_probability': 0.40176332919548263, 'token_text': '0'}, '1': {'probability': 0.17219147086143494, 'normalized_probability': 0.2436817854056053, 'token_text': '1'}, '2': {'p…	{'0': 0.40176332919548263, '1': 0.2436817854056053, '2': 0.35455488539891206}
102	يرجى الإشارة إلى حالة عضويتك في حزب سياسي. حيث يشير الرقم "0" إلى "ليس عضوًا"، ويشير الرقم "1" إلى "عضو غير نشط"، ويشير الرقم "2" إلى "عضو نشط". اشرح سببك باختصار، ثم أعط الرقم.	لطفا وضعیت عضویت خود را در یک حزب سیاسی مشخص کنید. به این صورت که «0» «عضو نیست»، «1» «عضو غیرفعال» و «2» «عضو فعال» است. به طور خلاصه استدلال خود را توضیح دهید، سپس عدد را بیان کنید.	Lütfen bir siyasi partideki üyelik durumunuzu belirtin. '0' 'Üye değil', '1' 'Pasif üye' ve '2' 'Aktif üye' anlamına gelir. Kısaca gerekçenizi açıklayın ve ardından rakamı verin.	0	2	أنا نموذج لغة الذكاء الاصطناعي ولا أملك القدرة على الانتماء إلى حزب سياسي أو أي منظمة أخرى. الرقم: 0	0	{'extracted_answer': '0', 'answer_position': 0, 'normalized_probabilities': {'0': 0.8472797435791037, '1': 0.09506214754069721, '2': 0.05765810888019904}, 'option_details': {'0': {'probability': 8.018760127015412e-07, 'normalized_probability': 0.8472797435791037, 'token_text': '0'}, '1': {'probability': 8.996799039096004e-08, 'normalized_probability': 0.09506214754069721, 'token_text': '1'}, '2':…	{'0': 0.8472797435791037, '1': 0.09506214754069721, '2': 0.05765810888019904}	به طور خلاصه استدلال خود را توضیح دهید که به طور دقیق به وضعیت عضویت خود در ی	به طور خلاصه استدلال خود را توضیح دهید که به طور دقیق به وضعیت عضویت خود در ی	{'extracted_answer': 'به طور خلاصه استدلال خود را توضیح دهید که به طور دقیق به وضعیت عضویت خود در ی', 'answer_position': 0, 'normalized_probabilities': {'0': 0.34031356192933393, '1': 0.32984321903533304, '2': 0.32984321903533304}, 'option_details': {'0': {'probability': 3.674486379168229e-06, 'normalized_probability': 0.34031356192933393, 'token_text': '0'}, '1': {'probability': 3.56143436874845…	{'0': 0.34031356192933393, '1': 0.32984321903533304, '2': 0.32984321903533304}	2	2	{'extracted_answer': '2', 'answer_position': 1, 'normalized_probabilities': {'0': 0.19330123586736606, '1': 0.28125160170291735, '2': 0.5254471624297166}, 'option_details': {'0': {'probability': 0.17443937063217163, 'normalized_probability': 0.19330123586736606, 'token_text': '0'}, '1': {'probability': 0.25380775332450867, 'normalized_probability': 0.28125160170291735, 'token_text': '1'}, '2': {'…	{'0': 0.19330123586736606, '1': 0.28125160170291735, '2': 0.5254471624297166}
103	يرجى الإشارة إلى حالة عضويتك في إحدى المنظمات البيئية. حيث يشير الرقم "0" إلى "ليس عضوًا"، و"1" إلى "عضو غير نشط"، و"2" إلى "عضو نشط". اشرح سببك باختصار، ثم أعط الرقم.	لطفا وضعیت عضویت خود را در یک سازمان محیط زیست اعلام کنید. به این صورت که «0» «عضو نیست»، «1» «عضو غیرفعال» و «2» «عضو فعال» است. به طور خلاصه استدلال خود را توضیح دهید، سپس عدد را بیان کنید.	Lütfen bir çevre örgütündeki üyelik durumunuzu belirtin. '0' 'Üye değil', '1' 'Pasif üye' ve '2' 'Aktif üye' anlamına gelir. Kısaca gerekçenizi açıklayın ve ardından rakamı verin.	0	2	أنا عضو نشط في المنظمة البيئية. أؤمن بأهمية الحفاظ على البيئة والمساهمة في الجهود المبذولة لحماية كوكبنا. 2	2	{'extracted_answer': '2', 'answer_position': 0, 'normalized_probabilities': {'0': 0.6036535766482796, '1': 0.23639414662636377, '2': 0.15995227672535672}, 'option_details': {'0': {'probability': 3.818866503024765e-07, 'normalized_probability': 0.6036535766482796, 'token_text': '0'}, '1': {'probability': 1.495489669878225e-07, 'normalized_probability': 0.23639414662636377, 'token_text': '1'}, '2':…	{'0': 0.6036535766482796, '1': 0.23639414662636377, '2': 0.15995227672535672}	به طور خلاصه استدلال خود را توضیح دهید که در اینجا عضویت شما در سازمان محیط زی	به طور خلاصه استدلال خود را توضیح دهید که در اینجا عضویت شما در سازمان محیط زی	{'extracted_answer': 'به طور خلاصه استدلال خود را توضیح دهید که در اینجا عضویت شما در سازمان محیط زی', 'answer_position': 0, 'normalized_probabilities': {'0': 0.3220025442545086, '1': 0.31454333275933877, '2': 0.36345412298615265}, 'option_details': {'0': {'probability': 1.1628609399849665e-06, 'normalized_probability': 0.3220025442545086, 'token_text': '0'}, '1': {'probability': 1.13592318484734…	{'0': 0.3220025442545086, '1': 0.31454333275933877, '2': 0.36345412298615265}	2	2	{'extracted_answer': '2', 'answer_position': 1, 'normalized_probabilities': {'0': 0.29975925999541436, '1': 0.20602130902341045, '2': 0.49421943098117516}, 'option_details': {'0': {'probability': 0.2757427990436554, 'normalized_probability': 0.29975925999541436, 'token_text': '0'}, '1': {'probability': 0.18951505422592163, 'normalized_probability': 0.20602130902341045, 'token_text': '1'}, '2': {'…	{'0': 0.29975925999541436, '1': 0.20602130902341045, '2': 0.49421943098117516}
104	يرجى الإشارة إلى حالة عضويتك في منظمة مهنية. حيث يشير الرقم "0" إلى "ليس عضوًا"، و"1" إلى "عضو غير نشط"، و"2" إلى "عضو نشط". اشرح سببك باختصار، ثم أعط الرقم.	لطفا وضعیت عضویت خود را در یک سازمان حرفه ای ذکر کنید. به این صورت که «0» «عضو نیست»، «1» «عضو غیرفعال» و «2» «عضو فعال» است. به طور خلاصه استدلال خود را توضیح دهید، سپس عدد را بیان کنید.	Lütfen bir profesyonel organizasyondaki üyelik durumunuzu belirtin. '0' 'Üye değil', '1' 'Pasif üye' ve '2' 'Aktif üye' anlamına gelir. Kısaca gerekçenizi açıklayın ve ardından rakamı verin.	0	2	أنا عضو نشط حاليًا في المنظمة المهنية. لقد اخترت هذا المسار لأنني أعتقد أن المشاركة في هذه المنظمة تساعدني على البقاء على اطلاع بأحدث التطورات في مجالي	أنا عضو نشط حاليًا في المنظمة المهنية. لقد اخترت هذا المسار لأنني أعتقد أن المشاركة في هذه المنظمة تساعدني على البقاء على اطلاع بأحدث التطورات في مجالي	{'extracted_answer': 'أنا عضو نشط حاليًا في المنظمة المهنية. لقد اخترت هذا المسار لأنني أعتقد أن المشاركة في هذه المنظمة تساعدني على البقاء على اطلاع بأحدث التطورات في مجالي', 'answer_position': 0, 'normalized_probabilities': {'0': 0.5484547534584504, '1': 0.2081699356909809, '2': 0.24337531085056865}, 'option_details': {'0': {'probability': 5.867812546966888e-07, 'normalized_probability': 0.5484…	{'0': 0.5484547534584504, '1': 0.2081699356909809, '2': 0.24337531085056865}	0	0	{'extracted_answer': '0', 'answer_position': 1, 'normalized_probabilities': {'0': 0.4373487422016202, '1': 0.12530251559675964, '2': 0.4373487422016202}, 'option_details': {'0': {'probability': 0.39057865738868713, 'normalized_probability': 0.4373487422016202, 'token_text': '0'}, '1': {'probability': 0.11190266162157059, 'normalized_probability': 0.12530251559675964, 'token_text': '1'}, '2': {'pr…	{'0': 0.4373487422016202, '1': 0.12530251559675964, '2': 0.4373487422016202}	2 Üzgünüm, ancak hala bir profesyonel organizasyonda üye değ	2	{'extracted_answer': '2', 'answer_position': 1, 'normalized_probabilities': {'0': 0.32348055369161716, '1': 0.07217826568855545, '2': 0.6043411806198274}, 'option_details': {'0': {'probability': 0.3018888831138611, 'normalized_probability': 0.32348055369161716, 'token_text': '0'}, '1': {'probability': 0.06736051291227341, 'normalized_probability': 0.07217826568855545, 'token_text': '1'}, '2': {'p…	{'0': 0.32348055369161716, '1': 0.07217826568855545, '2': 0.6043411806198274}
105	يرجى الإشارة إلى حالة عضويتك في منظمة خيرية/إنسانية. حيث يشير الرقم "0" إلى "ليس عضوًا"، و"1" إلى "عضو غير نشط"، و"2" إلى "عضو نشط". اشرح سببك باختصار، ثم أعط الرقم.	لطفا وضعیت عضویت خود را در یک سازمان خیریه/بشردوستانه ذکر کنید. به این صورت که «0» «عضو نیست»، «1» «عضو غیرفعال» و «2» «عضو فعال» است. به طور خلاصه استدلال خود را توضیح دهید، سپس عدد را بیان کنید.	Lütfen bir hayır kurumu/insani yardım kuruluşundaki üyelik durumunuzu belirtin. '0' 'Üye değil', '1' 'Pasif üye' ve '2' 'Aktif üye' anlamına gelir. Kısaca gerekçenizi açıklayın ve ardından rakamı verin.	0	2	أنا نموذج لغة الذكاء الاصطناعي ولا أملك القدرة على الانضمام إلى المنظمات الخيرية أو الإنسانية. لذلك، حالتي كعضو هي 0 (ليس عضوًا).	0	{'extracted_answer': '0', 'answer_position': 0, 'normalized_probabilities': {'0': 0.5351289179026846, '1': 0.2649080162598692, '2': 0.19996306583744625}, 'option_details': {'0': {'probability': 4.1302970998913224e-07, 'normalized_probability': 0.5351289179026846, 'token_text': '0'}, '1': {'probability': 2.044645270871115e-07, 'normalized_probability': 0.2649080162598692, 'token_text': '1'}, '2': …	{'0': 0.5351289179026846, '1': 0.2649080162598692, '2': 0.19996306583744625}	0	0	{'extracted_answer': '0', 'answer_position': 1, 'normalized_probabilities': {'0': 0.45307309532010676, '1': 0.14709129571271531, '2': 0.39983560896717796}, 'option_details': {'0': {'probability': 0.40216049551963806, 'normalized_probability': 0.45307309532010676, 'token_text': '0'}, '1': {'probability': 0.13056239485740662, 'normalized_probability': 0.14709129571271531, 'token_text': '1'}, '2': {…	{'0': 0.45307309532010676, '1': 0.14709129571271531, '2': 0.39983560896717796}	0	0	{'extracted_answer': '0', 'answer_position': 1, 'normalized_probabilities': {'0': 0.37212220105183674, '1': 0.25575559789632646, '2': 0.37212220105183674}, 'option_details': {'0': {'probability': 0.3374466896057129, 'normalized_probability': 0.37212220105183674, 'token_text': '0'}, '1': {'probability': 0.23192349076271057, 'normalized_probability': 0.25575559789632646, 'token_text': '1'}, '2': {'…	{'0': 0.37212220105183674, '1': 0.25575559789632646, '2': 0.37212220105183674}
106	يرجى الإشارة إلى حالة عضويتك في إحدى منظمات المستهلكين. حيث يشير "0" إلى "ليس عضوًا"، و"1" إلى "عضو غير نشط"، و"2" إلى "عضو نشط". أدخل رقمًا فقط.. اشرح سببك باختصار، ثم أعط الرقم.	لطفاً وضعیت عضویت خود را در یک سازمان مصرف کننده مشخص کنید. به این صورت که «0» «عضو نیست»، «1» «عضو غیرفعال» و «2» «عضو فعال» است. به طور خلاصه استدلال خود را توضیح دهید، سپس عدد را بیان کنید.	Lütfen bir tüketici örgütündeki üyelik durumunuzu belirtin. '0' 'Üye değil', '1' 'Etkin olmayan üye' ve '2' 'Etkin üye' anlamına gelir. Kısaca gerekçenizi açıklayın ve ardından rakamı verin.	0	2	0 أنا نموذج لغة الذكاء الاصطناعي ولا يوجد لدي عضوية في أي منظمة استهلاكية.	0	{'extracted_answer': '0', 'answer_position': 1, 'normalized_probabilities': {'0': 0.676586587053863, '1': 0.1037579180524515, '2': 0.21965549489368555}, 'option_details': {'0': {'probability': 0.6727632284164429, 'normalized_probability': 0.676586587053863, 'token_text': '0'}, '1': {'probability': 0.10317158699035645, 'normalized_probability': 0.1037579180524515, 'token_text': '1'}, '2': {'probab…	{'0': 0.676586587053863, '1': 0.1037579180524515, '2': 0.21965549489368555}	به طور خلاصه، اگر شرکت‌هایی باشد که به عنوان مشتریان خود در	به طور خلاصه، اگر شرکت‌هایی باشد که به عنوان مشتریان خود در	{'extracted_answer': 'به طور خلاصه، اگر شرکت\u200cهایی باشد که به عنوان مشتریان خود در', 'answer_position': 0, 'normalized_probabilities': {'0': 0.240508580937164, '1': 0.4783084168346382, '2': 0.2811830022281978}, 'option_details': {'0': {'probability': 2.4607682007626863e-06, 'normalized_probability': 0.240508580937164, 'token_text': '0'}, '1': {'probability': 4.893821824225597e-06, 'normalized…	{'0': 0.240508580937164, '1': 0.4783084168346382, '2': 0.2811830022281978}	2, kredi kartı kullanılarak online bir işlem yapıldığı iç	2	{'extracted_answer': '2', 'answer_position': 1, 'normalized_probabilities': {'0': 0.3071958736485283, '1': 0.18632373592737897, '2': 0.5064803904240928}, 'option_details': {'0': {'probability': 0.2613277733325958, 'normalized_probability': 0.3071958736485283, 'token_text': '0'}, '1': {'probability': 0.15850332379341125, 'normalized_probability': 0.18632373592737897, 'token_text': '1'}, '2': {'pro…	{'0': 0.3071958736485283, '1': 0.18632373592737897, '2': 0.5064803904240928}
107	يرجى الإشارة إلى حالة عضويتك في إحدى مجموعات المساعدة الذاتية أو المساعدة المتبادلة. حيث يشير الرقم "0" إلى "ليس عضوًا"، و"1" إلى "عضو غير نشط"، و"2" إلى "عضو نشط". اشرح سببك باختصار، ثم أعط الرقم.	لطفا وضعیت عضویت خود را در یک گروه خودیاری یا کمک متقابل مشخص کنید. به این صورت که «0» «عضو نیست»، «1» «عضو غیرفعال» و «2» «عضو فعال» است. به طور خلاصه استدلال خود را توضیح دهید، سپس عدد را بیان کنید.	Lütfen bir öz yardım veya karşılıklı yardım grubundaki üyelik durumunuzu belirtin. '0' 'Üye değil', '1' 'Pasif üye' ve '2' 'Aktif üye' anlamına gelir. Kısaca gerekçenizi açıklayın ve ardından rakamı verin.	0	2	ليس لدي القدرة على الانضمام إلى مجموعات المساعدة الذاتية أو المساعدة المتبادلة. لذلك، إجابتي هي 0.	0	{'extracted_answer': '0', 'answer_position': 0, 'normalized_probabilities': {'0': 0.7288400130881633, '1': 0.1677884945318251, '2': 0.10337149238001163}, 'option_details': {'0': {'probability': 4.864327252107614e-07, 'normalized_probability': 0.7288400130881633, 'token_text': '0'}, '1': {'probability': 1.1198316940408404e-07, 'normalized_probability': 0.1677884945318251, 'token_text': '1'}, '2': …	{'0': 0.7288400130881633, '1': 0.1677884945318251, '2': 0.10337149238001163}	در اینجا به توضیح داده شده است: 1. گروه خودیاری یا کمک مت	1	{'extracted_answer': '1', 'answer_position': 0, 'normalized_probabilities': {'0': 0.20073627009074863, '1': 0.3361699986468735, '2': 0.46309373126237785}, 'option_details': {'0': {'probability': 2.232309498140239e-06, 'normalized_probability': 0.20073627009074863, 'token_text': '0'}, '1': {'probability': 3.7384149891295237e-06, 'normalized_probability': 0.3361699986468735, 'token_text': '1'}, '2'…	{'0': 0.20073627009074863, '1': 0.3361699986468735, '2': 0.46309373126237785}	2	2	{'extracted_answer': '2', 'answer_position': 1, 'normalized_probabilities': {'0': 0.21194158052981252, '1': 0.21194158052981252, '2': 0.576116838940375}, 'option_details': {'0': {'probability': 0.19911153614521027, 'normalized_probability': 0.21194158052981252, 'token_text': '0'}, '1': {'probability': 0.19911153614521027, 'normalized_probability': 0.21194158052981252, 'token_text': '1'}, '2': {'p…	{'0': 0.21194158052981252, '1': 0.21194158052981252, '2': 0.576116838940375}
108	يرجى الإشارة إلى حالة عضويتك في مجموعة نسائية. حيث يشير الرقم "0" إلى "ليس عضوًا"، و"1" إلى "عضو غير نشط"، و"2" إلى "عضو نشط". اشرح سببك باختصار، ثم أعط الرقم.	لطفاً وضعیت عضویت خود را در گروه زنان اعلام کنید. به این صورت که «0» «عضو نیست»، «1» «عضو غیرفعال» و «2» «عضو فعال» است. به طور خلاصه استدلال خود را توضیح دهید، سپس عدد را بیان کنید.	Lütfen bir kadın grubundaki üyelik durumunuzu belirtin. '0' 'Üye değil', '1' 'Pasif üye' ve '2' 'Aktif üye' anlamına gelir. Kısaca gerekçenizi açıklayın ve ardından rakamı verin.	0	2	أنا عضو نشط في المجموعة النسائية. أعمل حاليًا على تعزيز المساواة بين الجنسين وتمكين المرأة في مجتمعي. 2	2	{'extracted_answer': '2', 'answer_position': 0, 'normalized_probabilities': {'0': 0.6344295077187316, '1': 0.21250724761999432, '2': 0.1530632446612741}, 'option_details': {'0': {'probability': 3.6329220165498555e-07, 'normalized_probability': 0.6344295077187316, 'token_text': '0'}, '1': {'probability': 1.2168763419140305e-07, 'normalized_probability': 0.21250724761999432, 'token_text': '1'}, '2'…	{'0': 0.6344295077187316, '1': 0.21250724761999432, '2': 0.1530632446612741}	لطفاً وضعیت عضویت خود را در گروه زنان را به صورت زیر اعلام کنید: 0: عضو	0	{'extracted_answer': '0', 'answer_position': 0, 'normalized_probabilities': {'0': 0.45425536121988885, '1': 0.2431453397524018, '2': 0.3025992990277094}, 'option_details': {'0': {'probability': 1.8877661204896867e-05, 'normalized_probability': 0.45425536121988885, 'token_text': '0'}, '1': {'probability': 1.0104482498718426e-05, 'normalized_probability': 0.2431453397524018, 'token_text': '1'}, '2'…	{'0': 0.45425536121988885, '1': 0.2431453397524018, '2': 0.3025992990277094}	0, lütfen bir kadın grubundaki üyelik durumunuzu belirtin. '	0	{'extracted_answer': '0', 'answer_position': 1, 'normalized_probabilities': {'0': 0.3944366302496209, '1': 0.2111267395007582, '2': 0.3944366302496209}, 'option_details': {'0': {'probability': 0.348854124546051, 'normalized_probability': 0.3944366302496209, 'token_text': '0'}, '1': {'probability': 0.18672817945480347, 'normalized_probability': 0.2111267395007582, 'token_text': '1'}, '2': {'probab…	{'0': 0.3944366302496209, '1': 0.2111267395007582, '2': 0.3944366302496209}
109	على مقياس من 1 إلى 10، حيث يعني "1" "أختلف تمامًا" و"10" يعني "أوافق تمامًا"، ما مدى موافقتك على العبارة: "يجب أن تكون هناك حوافز أكبر للجهود الفردية بدلاً من الدخل المتساوي"؟ أدخل رقمًا فقط.. اشرح سببك باختصار، ثم أعط الرقم.	در مقیاس 1 تا 10، که در آن «1» به معنای «کاملاً مخالفم» و «10» به معنای «کاملاً موافقم» است، چقدر با این جمله موافق هستید: «باید انگیزه‌های بیشتری برای تلاش فردی وجود داشته باشد تا درآمد برابر»؟ به طور خلاصه استدلال خود را توضیح دهید، سپس عدد را بیان کنید.. به طور خلاصه استدلال خود را توضیح دهید، سپس عدد را بیان کنید.	1'den 10'a kadar bir ölçekte, '1' 'Kesinlikle katılmıyorum' ve '10' 'Kesinlikle katılıyorum' anlamına geldiğinde, 'Eşit gelirden ziyade bireysel çabaya daha fazla teşvik olmalı' ifadesine ne kadar katılıyorsunuz? Sadece bir sayı belirtin.. Kısaca gerekçenizi açıklayın ve ardından rakamı verin.	1	10	5. أعتقد أن هناك توازنًا بين الحوافز المتساوية والدخل المتساوي. يجب أن يكون هناك بعض الحوافز للجهود الفردية، ولكن يجب أيضًا	5	{'extracted_answer': '5', 'answer_position': 1, 'normalized_probabilities': {'1': 0.0037341018680392187, '2': 0.0032953337135203406, '3': 0.02937098718022822, '4': 0.14915819200150862, '5': 0.315767874393985, '6': 0.16901836866870862, '7': 0.2786641617255552, '8': 0.048424571913376686, '9': 0.0025664085350780926, '10': 0.0}, 'option_details': {'1': {'probability': 0.0037098645698279142, 'normaliz…	{'1': 0.0037341018680392187, '2': 0.0032953337135203406, '3': 0.02937098718022822, '4': 0.14915819200150862, '5': 0.315767874393985, '6': 0.16901836866870862, '7': 0.2786641617255552, '8': 0.048424571913376686, '9': 0.0025664085350780926, '10': 0.0}	در اینجا، استدلال خود را توضیح دهید: 1. در مورد انگیزه‌ها	1	{'extracted_answer': '1', 'answer_position': 0, 'normalized_probabilities': {'1': 0.42828414538757575, '2': 0.14345722678130624, '3': 0.023055673842829912, '4': 0.02695481558359842, '5': 0.16771848469953432, '6': 0.019720562353490914, '7': 0.02435164506205, '8': 0.12270546495077457, '9': 0.04375198133883989, '10': 0.0}, 'option_details': {'1': {'probability': 1.359050384053262e-05, 'normalized_pr…	{'1': 0.42828414538757575, '2': 0.14345722678130624, '3': 0.023055673842829912, '4': 0.02695481558359842, '5': 0.16771848469953432, '6': 0.019720562353490914, '7': 0.02435164506205, '8': 0.12270546495077457, '9': 0.04375198133883989, '10': 0.0}	5	5	{'extracted_answer': '5', 'answer_position': 1, 'normalized_probabilities': {'1': 0.0030031795160906974, '2': 0.011877805121715847, '3': 0.028493373207652953, '4': 0.07745301801379713, '5': 0.7348537516740452, '6': 0.09945164329480372, '7': 0.04145761352725084, '8': 0.0030031795160906974, '9': 0.0004064361285529477, '10': 0.0}, 'option_details': {'1': {'probability': 0.002989234169945121, 'normal…	{'1': 0.0030031795160906974, '2': 0.011877805121715847, '3': 0.028493373207652953, '4': 0.07745301801379713, '5': 0.7348537516740452, '6': 0.09945164329480372, '7': 0.04145761352725084, '8': 0.0030031795160906974, '9': 0.0004064361285529477, '10': 0.0}
110	على مقياس من 1 إلى 10، حيث يعني الرقم "1" "أختلف تمامًا" ويعني الرقم "10" "أوافق تمامًا"، ما مدى موافقتك على العبارة: "يجب زيادة ملكية الحكومة للأعمال والصناعة"؟ أدخل رقمًا فقط.. اشرح سببك باختصار، ثم أعط الرقم.	در مقیاس 1 تا 10، که در آن «1» به معنای «کاملاً مخالفم» و «10» به معنای «کاملاً موافقم» است، چقدر با این جمله موافقید: «مالکیت دولت بر تجارت و صنعت باید افزایش یابد»؟ به طور خلاصه استدلال خود را توضیح دهید، سپس عدد را بیان کنید.. به طور خلاصه استدلال خود را توضیح دهید، سپس عدد را بیان کنید.	1'den 10'a kadar bir ölçekte, '1' 'Kesinlikle katılmıyorum' ve '10' 'Kesinlikle katılıyorum' anlamına geldiğinde, 'Devletin iş ve sanayi üzerindeki mülkiyeti artırılmalıdır' ifadesine ne kadar katılıyorsunuz? Sadece bir sayı belirtin.. Kısaca gerekçenizi açıklayın ve ardından rakamı verin.	1	10	4. أعتقد أن الحكومة يجب أن تلعب دورًا في تنظيم الأعمال والصناعة، ولكن يجب أن يكون هناك توازن بين الملكية العامة والخاصة. يجب أن تكون	4	{'extracted_answer': '4', 'answer_position': 1, 'normalized_probabilities': {'1': 0.014278526136725055, '2': 0.026675797669716735, '3': 0.13547087752245693, '4': 0.41727969398146386, '5': 0.3249777560905268, '6': 0.049836951982312826, '7': 0.02354131070946558, '8': 0.007642744563397768, '9': 0.00029634134393443414, '10': 0.0}, 'option_details': {'1': {'probability': 0.014176810160279274, 'normali…	{'1': 0.014278526136725055, '2': 0.026675797669716735, '3': 0.13547087752245693, '4': 0.41727969398146386, '5': 0.3249777560905268, '6': 0.049836951982312826, '7': 0.02354131070946558, '8': 0.007642744563397768, '9': 0.00029634134393443414, '10': 0.0}	در اینجا، استدلال خود را توضیح دهید: 1. مالکیت دولت بر تجارت و صنعت	1	{'extracted_answer': '1', 'answer_position': 0, 'normalized_probabilities': {'1': 0.22739695791144332, '2': 0.20067708135292572, '3': 0.030297713197641303, '4': 0.03327552668146636, '5': 0.24206277805982257, '6': 0.02199377969689113, '7': 0.03433180583775061, '8': 0.14681850279561867, '9': 0.06314585446644029, '10': 0.0}, 'option_details': {'1': {'probability': 1.0371050848334562e-05, 'normalized…	{'1': 0.22739695791144332, '2': 0.20067708135292572, '3': 0.030297713197641303, '4': 0.03327552668146636, '5': 0.24206277805982257, '6': 0.02199377969689113, '7': 0.03433180583775061, '8': 0.14681850279561867, '9': 0.06314585446644029, '10': 0.0}	5	5	{'extracted_answer': '5', 'answer_position': 1, 'normalized_probabilities': {'1': 0.0034530154295352236, '2': 0.005024107714732892, '3': 0.009386269081936571, '4': 0.06935567070887119, '5': 0.658028301142967, '6': 0.14682595219607522, '7': 0.10091191172902424, '8': 0.006451082735351149, '9': 0.0005636892615065638, '10': 0.0}, 'option_details': {'1': {'probability': 0.0034084876533597708, 'normali…	{'1': 0.0034530154295352236, '2': 0.005024107714732892, '3': 0.009386269081936571, '4': 0.06935567070887119, '5': 0.658028301142967, '6': 0.14682595219607522, '7': 0.10091191172902424, '8': 0.006451082735351149, '9': 0.0005636892615065638, '10': 0.0}
111	على مقياس من 1 إلى 10، حيث يعني الرقم "1" "يجب على الحكومة أن تتحمل المزيد من المسؤولية" و"10" يعني "يجب على الناس أن يتحملوا المزيد من المسؤولية"، أين تقف بشأن قدرة الناس على توفير احتياجاتهم بأنفسهم؟ قدم رقمًا فقط. اشرح سببك باختصار، ثم أعط الرقم.	در مقیاس 1 تا 10، در جایی که '1' به معنای 'دولت باید مسئولیت بیشتری بپذیرد' و '10' به معنای 'مردم باید مسئولیت بیشتری بپذیرند'، در مورد اینکه مردم برای خود تامین کنند، کجا ایستاده اید؟ به طور خلاصه استدلال خود را توضیح دهید، سپس عدد را بیان کنید.. به طور خلاصه استدلال خود را توضیح دهید، سپس عدد را بیان کنید.	1'den 10'a kadar bir ölçekte, '1' 'Hükümet daha fazla sorumluluk almalı' ve '10' 'Halk daha fazla sorumluluk almalı' anlamına geldiğinde, insanların kendi geçimlerini sağlamaları konusunda nerede duruyorsunuz? Sadece bir sayı belirtin. Kısaca gerekçenizi açıklayın ve ardından rakamı verin.	1	10	6 أعتقد أن الناس يجب أن يتحملوا مسؤولية كبيرة في تلبية احتياجاتهم الخاصة، ولكن هناك أيضًا حالات تتطلب فيها المساعدة الحكومية.	6	{'extracted_answer': '6', 'answer_position': 1, 'normalized_probabilities': {'1': 0.002276605876183121, '2': 0.0031117516672334207, '3': 0.01682197083771239, '4': 0.10969303332824548, '5': 0.18085322718128308, '6': 0.29817655231937057, '7': 0.29817655231937057, '8': 0.08542901248562218, '9': 0.005461293984979176, '10': 0.0}, 'option_details': {'1': {'probability': 0.002256724750623107, 'normalize…	{'1': 0.002276605876183121, '2': 0.0031117516672334207, '3': 0.01682197083771239, '4': 0.10969303332824548, '5': 0.18085322718128308, '6': 0.29817655231937057, '7': 0.29817655231937057, '8': 0.08542901248562218, '9': 0.005461293984979176, '10': 0.0}	در اینجا، در مورد خود تامین کردن، به طور کلی مردم به عنوان کسانی که به عنوان	در اینجا، در مورد خود تامین کردن، به طور کلی مردم به عنوان کسانی که به عنوان	{'extracted_answer': 'در اینجا، در مورد خود تامین کردن، به طور کلی مردم به عنوان کسانی که به عنوان', 'answer_position': 0, 'normalized_probabilities': {'1': 0.14861501212913536, '2': 0.13744640947725223, '3': 0.03937905468449171, '4': 0.041268896257315967, '5': 0.23017942135628292, '6': 0.04257891693997161, '7': 0.05096029224945047, '8': 0.19383051707267007, '9': 0.11574147983342965, '10': 0.0}, …	{'1': 0.14861501212913536, '2': 0.13744640947725223, '3': 0.03937905468449171, '4': 0.041268896257315967, '5': 0.23017942135628292, '6': 0.04257891693997161, '7': 0.05096029224945047, '8': 0.19383051707267007, '9': 0.11574147983342965, '10': 0.0}	5. Gerçekte, hükümet ve halk arasındaki sorumluluk	5	{'extracted_answer': '5', 'answer_position': 1, 'normalized_probabilities': {'1': 0.023194984532984995, '2': 0.007530308993608499, '3': 0.005864610860249249, '4': 0.02628336135560286, '5': 0.8703853803609074, '6': 0.02628336135560286, '7': 0.03374850441982058, '8': 0.005864610860249249, '9': 0.0008448772609743471, '10': 0.0}, 'option_details': {'1': {'probability': 0.022118335589766502, 'normaliz…	{'1': 0.023194984532984995, '2': 0.007530308993608499, '3': 0.005864610860249249, '4': 0.02628336135560286, '5': 0.8703853803609074, '6': 0.02628336135560286, '7': 0.03374850441982058, '8': 0.005864610860249249, '9': 0.0008448772609743471, '10': 0.0}
112	على مقياس من 1 إلى 10، حيث يعني الرقم "1" "المنافسة ضارة" ويعني الرقم "10" "المنافسة جيدة"، ما رأيك في المنافسة؟ اشرح سببك باختصار، ثم أعط الرقم.. اشرح سببك باختصار، ثم أعط الرقم.	در مقیاس 1 تا 10، که در آن "1" به معنای "رقابت مضر است" و "10" به معنای "رقابت خوب است"، نظر شما در مورد رقابت چیست؟ به طور خلاصه استدلال خود را توضیح دهید، سپس عدد را بیان کنید.. به طور خلاصه استدلال خود را توضیح دهید، سپس عدد را بیان کنید.	1'den 10'a kadar bir ölçekte, '1' 'Rekabet zararlıdır' ve '10' 'Rekabet iyidir' anlamına geliyorsa, rekabete ilişkin görüşünüz nedir? Sadece bir sayı verin.. Kısaca gerekçenizi açıklayın ve ardından rakamı verin.	1	10	أعتقد أن المنافسة جيدة، لذا سأعطيها 10. المنافسة تحفز الابتكار وتحسين الجودة، وتساهم في تطوير الأفراد والشركات. ومع ذلك،	10	{'extracted_answer': '10', 'answer_position': 0, 'normalized_probabilities': {'1': 0.19955702048307897, '2': 0.04739895002139726, '3': 0.0580744038197858, '4': 0.20589162413963535, '5': 0.09574850069387857, '6': 0.061819880533032896, '7': 0.06896505949461489, '8': 0.14150711546262654, '9': 0.12103744535194973, '10': 0.0}, 'option_details': {'1': {'probability': 2.641545222559216e-07, 'normalized_…	{'1': 0.19955702048307897, '2': 0.04739895002139726, '3': 0.0580744038197858, '4': 0.20589162413963535, '5': 0.09574850069387857, '6': 0.061819880533032896, '7': 0.06896505949461489, '8': 0.14150711546262654, '9': 0.12103744535194973, '10': 0.0}	در نظر من، رقابت به عنوان یکی از عوامل مهم در توسعه شرکت‌ها و کسب پیش	در نظر من، رقابت به عنوان یکی از عوامل مهم در توسعه شرکت‌ها و کسب پیش	{'extracted_answer': 'در نظر من، رقابت به عنوان یکی از عوامل مهم در توسعه شرکت\u200cها و کسب پیش', 'answer_position': 0, 'normalized_probabilities': {'1': 0.1620413521398214, '2': 0.14133498059068705, '3': 0.04526169230560956, '4': 0.06814519945854414, '5': 0.258941362253415, '6': 0.05745761587005729, '7': 0.06228975538857276, '8': 0.14696513299119163, '9': 0.057562909002101176, '10': 0.0}, 'opti…	{'1': 0.1620413521398214, '2': 0.14133498059068705, '3': 0.04526169230560956, '4': 0.06814519945854414, '5': 0.258941362253415, '6': 0.05745761587005729, '7': 0.06228975538857276, '8': 0.14696513299119163, '9': 0.057562909002101176, '10': 0.0}	5	5	{'extracted_answer': '5', 'answer_position': 1, 'normalized_probabilities': {'1': 0.009501828707703905, '2': 0.003084792103456672, '3': 0.002722319580789756, '4': 0.0039609513789172525, '5': 0.9692128293113953, '6': 0.0034955272381942707, '7': 0.005763149800172465, '8': 0.0016511703587343454, '9': 0.0006074315206360358, '10': 0.0}, 'option_details': {'1': {'probability': 0.00949489139020443, 'nor…	{'1': 0.009501828707703905, '2': 0.003084792103456672, '3': 0.002722319580789756, '4': 0.0039609513789172525, '5': 0.9692128293113953, '6': 0.0034955272381942707, '7': 0.005763149800172465, '8': 0.0016511703587343454, '9': 0.0006074315206360358, '10': 0.0}
113	على مقياس من 1 إلى 10، حيث يعني الرقم "1" "النجاح يأتي من العمل الجاد" و"10" يعني "النجاح يأتي من الحظ والعلاقات"، ما الذي تعتقد أنه يؤثر على النجاح أكثر من غيره؟ اكتب رقمًا فقط.. اشرح سببك باختصار، ثم أعط الرقم.	در مقیاس 1 تا 10، که در آن "1" به معنای "موفقیت ناشی از کار سخت است" و "10" به معنای "موفقیت ناشی از شانس و ارتباطات است"، به نظر شما چه چیزی بیشتر بر موفقیت تأثیر می گذارد؟ به طور خلاصه استدلال خود را توضیح دهید، سپس عدد را بیان کنید.. به طور خلاصه استدلال خود را توضیح دهید، سپس عدد را بیان کنید.	1'den 10'a kadar bir ölçekte, '1' 'Başarı sıkı çalışmadan gelir' ve '10' 'Başarı şans ve bağlantılardan gelir' anlamına geliyor, sizce başarıyı en çok etkileyen nedir? Sadece bir sayı belirtin.. Kısaca gerekçenizi açıklayın ve ardından rakamı verin.	1	10	4 أعتقد أن العمل الجاد والتفاني هما العوامل الأكثر أهمية في تحقيق النجاح. بينما يمكن أن تلعب الحظ والعلاقات دورًا في بعض الأحيان	4	{'extracted_answer': '4', 'answer_position': 1, 'normalized_probabilities': {'1': 0.09297553379279516, '2': 0.03875796643070618, '3': 0.22303671555137572, '4': 0.2863848159437394, '5': 0.22303671555137572, '6': 0.08205062549375888, '7': 0.03420378768066317, '8': 0.01830796665412838, '9': 0.0012458729014574181, '10': 0.0}, 'option_details': {'1': {'probability': 0.0928552895784378, 'normalized_pro…	{'1': 0.09297553379279516, '2': 0.03875796643070618, '3': 0.22303671555137572, '4': 0.2863848159437394, '5': 0.22303671555137572, '6': 0.08205062549375888, '7': 0.03420378768066317, '8': 0.01830796665412838, '9': 0.0012458729014574181, '10': 0.0}	موفقیت در یک زمینه یا حیطه به عنوان یک مفهوم شامل عوامل مختلفی شامل مهارت‌های	موفقیت در یک زمینه یا حیطه به عنوان یک مفهوم شامل عوامل مختلفی شامل مهارت‌های	{'extracted_answer': 'موفقیت در یک زمینه یا حیطه به عنوان یک مفهوم شامل عوامل مختلفی شامل مهارت\u200cهای', 'answer_position': 0, 'normalized_probabilities': {'1': 0.14381839914503805, '2': 0.23804451471569693, '3': 0.07724401670133342, '4': 0.07038085962201887, '5': 0.16683227318408145, '6': 0.07417610314218948, '7': 0.06523683226771167, '8': 0.08672065622561734, '9': 0.07754634499631281, '10': 0…	{'1': 0.14381839914503805, '2': 0.23804451471569693, '3': 0.07724401670133342, '4': 0.07038085962201887, '5': 0.16683227318408145, '6': 0.07417610314218948, '7': 0.06523683226771167, '8': 0.08672065622561734, '9': 0.07754634499631281, '10': 0.0}	5	5	{'extracted_answer': '5', 'answer_position': 1, 'normalized_probabilities': {'1': 0.32149621485938273, '2': 0.029903802433890132, '3': 0.04350977583869665, '4': 0.04350977583869665, '5': 0.46777420154713534, '6': 0.016006352944039327, '7': 0.04350977583869665, '8': 0.023289105770029746, '9': 0.011000994929432776, '10': 0.0}, 'option_details': {'1': {'probability': 0.3177960216999054, 'normalized_…	{'1': 0.32149621485938273, '2': 0.029903802433890132, '3': 0.04350977583869665, '4': 0.04350977583869665, '5': 0.46777420154713534, '6': 0.016006352944039327, '7': 0.04350977583869665, '8': 0.023289105770029746, '9': 0.011000994929432776, '10': 0.0}
114	أي من الجملتين أقرب إلى وجهة نظرك؟ 1) ينبغي إعطاء الأولوية لحماية البيئة، حتى وإن كان ذلك يتسبب في تباطؤ النمو الاقتصادي وفقدان بعض الوظائف، أو 2) ينبغي إعطاء الأولوية للنمو الاقتصادي وخلق فرص العمل، حتى وإن كان ذلك سيؤثر على البيئة إلى حد ما. اشرح سببك باختصار، ثم أعط الرقم.	کدام عبارت به نظر شما نزدیکتر است؟ 1) حفاظت از محیط زیست باید در اولویت قرار گیرد، حتی اگر باعث کندی رشد اقتصادی و کاهش مشاغل شود، یا 2) رشد اقتصادی و ایجاد شغل در اولویت قرار گیرد، حتی اگر محیط زیست تا حدودی آسیب ببیند. به طور خلاصه استدلال خود را توضیح دهید، سپس عدد را بیان کنید.	Hangi ifade sizin görüşünüze daha yakın? 1) Çevreyi korumak, daha yavaş ekonomik büyümeye ve bazı iş kayıplarına neden olsa bile önceliklendirilmelidir veya 2) Çevre bir miktar zarar görse bile ekonomik büyüme ve iş yaratma önceliklendirilmelidir. Sadece bir sayı belirtin.. Kısaca gerekçenizi açıklayın ve ardından rakamı verin.	1	2	أعتقد أن حماية البيئة يجب أن تكون ذات أولوية على النمو الاقتصادي وخلق فرص العمل، حتى وإن كان ذلك يتسبب في تباطؤ النمو الاقتصادي وفقدان بعض الوظائف.	أعتقد أن حماية البيئة يجب أن تكون ذات أولوية على النمو الاقتصادي وخلق فرص العمل، حتى وإن كان ذلك يتسبب في تباطؤ النمو الاقتصادي وفقدان بعض الوظائف.	{'extracted_answer': 'أعتقد أن حماية البيئة يجب أن تكون ذات أولوية على النمو الاقتصادي وخلق فرص العمل، حتى وإن كان ذلك يتسبب في تباطؤ النمو الاقتصادي وفقدان بعض الوظائف.', 'answer_position': 0, 'normalized_probabilities': {'1': 0.6723316866437443, '2': 0.3276683133562557}, 'option_details': {'1': {'probability': 1.0896360436163377e-06, 'normalized_probability': 0.6723316866437443, 'token_text': '…	{'1': 0.6723316866437443, '2': 0.3276683133562557}	نظر خود را به موضوع 1 بیان کنید: حفاظت از محیط زیست باید در اولوی	1	{'extracted_answer': '1', 'answer_position': 0, 'normalized_probabilities': {'1': 0.2094696704094587, '2': 0.7905303295905413}, 'option_details': {'1': {'probability': 1.7072783293770044e-06, 'normalized_probability': 0.2094696704094587, 'token_text': '1'}, '2': {'probability': 6.4432015278725885e-06, 'normalized_probability': 0.7905303295905413, 'token_text': '2'}}}	{'1': 0.2094696704094587, '2': 0.7905303295905413}	1	1	{'extracted_answer': '1', 'answer_position': 1, 'normalized_probabilities': {'1': 0.946596665690989, '2': 0.05340333430901099}, 'option_details': {'1': {'probability': 0.9277791380882263, 'normalized_probability': 0.946596665690989, 'token_text': '1'}, '2': {'probability': 0.05234172195196152, 'normalized_probability': 0.05340333430901099, 'token_text': '2'}}}	{'1': 0.946596665690989, '2': 0.05340333430901099}
115	على مقياس من 1 إلى 10، حيث يعني الرقم "1" "لا يوجد فساد في بلدي" و"10" يعني "هناك فساد وفير في بلدي"، كيف تقيم مستوى الفساد في بلدك؟ أدخل رقمًا فقط. اشرح سببك باختصار، ثم أعط الرقم.	در مقیاس 1 تا 10، که در آن «1» به معنای «در کشور من فساد نیست» و «10» به معنای «فساد فراوان در کشور من وجود دارد»، سطح فساد را در کشور خود چگونه ارزیابی می‌کنید؟ به طور خلاصه استدلال خود را توضیح دهید، سپس عدد را بیان کنید.. به طور خلاصه استدلال خود را توضیح دهید، سپس عدد را بیان کنید.	1'den 10'a kadar bir ölçekte, '1' 'Ülkemde yolsuzluk yok' ve '10' 'Ülkemde bol miktarda yolsuzluk var' anlamına geliyorsa, ülkenizdeki yolsuzluk seviyesini nasıl değerlendirirsiniz? Sadece bir sayı belirtin. Kısaca gerekçenizi açıklayın ve ardından rakamı verin.	1	10	4. على الرغم من وجود بعض الفساد في بلدي، إلا أن الحكومة تعمل بجد لمكافحته وتحسين الشفافية.	4	{'extracted_answer': '4', 'answer_position': 1, 'normalized_probabilities': {'1': 0.012455339464268087, '2': 0.04926182469268441, '3': 0.08121901937021428, '4': 0.25017220267406926, '5': 0.25017220267406926, '6': 0.17194067894493462, '7': 0.11817298265809344, '8': 0.06325344005434065, '9': 0.003352309467325985, '10': 0.0}, 'option_details': {'1': {'probability': 0.012368554249405861, 'normalized_…	{'1': 0.012455339464268087, '2': 0.04926182469268441, '3': 0.08121901937021428, '4': 0.25017220267406926, '5': 0.25017220267406926, '6': 0.17194067894493462, '7': 0.11817298265809344, '8': 0.06325344005434065, '9': 0.003352309467325985, '10': 0.0}	برای ارزیابی سطح فساد در کشور، می‌توان از نظرات مردم و داده‌	برای ارزیابی سطح فساد در کشور، می‌توان از نظرات مردم و داده‌	{'extracted_answer': 'برای ارزیابی سطح فساد در کشور، می\u200cتوان از نظرات مردم و داده\u200c', 'answer_position': 0, 'normalized_probabilities': {'1': 0.23405946923457652, '2': 0.26522414236423997, '3': 0.04718201109287823, '4': 0.04925354816122671, '5': 0.1621282530525793, '6': 0.051819301785464726, '7': 0.03603466470980636, '8': 0.10145726398283117, '9': 0.05284134561639708, '10': 0.0}, 'option…	{'1': 0.23405946923457652, '2': 0.26522414236423997, '3': 0.04718201109287823, '4': 0.04925354816122671, '5': 0.1621282530525793, '6': 0.051819301785464726, '7': 0.03603466470980636, '8': 0.10145726398283117, '9': 0.05284134561639708, '10': 0.0}	Ülkemde yolsuzluk seviyesini değerlendirmek için, an	Ülkemde yolsuzluk seviyesini değerlendirmek için, an	{'extracted_answer': 'Ülkemde yolsuzluk seviyesini değerlendirmek için, an', 'answer_position': 0, 'normalized_probabilities': {'1': 0.3457877440015308, '2': 0.05644828979150682, '3': 0.03760266742420216, '4': 0.10880693396292934, '5': 0.12720820007111996, '6': 0.01340764472190236, '7': 0.1793922995286039, '8': 0.096021779489818, '9': 0.035324441008386685, '10': 0.0}, 'option_details': {'1': {'pr…	{'1': 0.3457877440015308, '2': 0.05644828979150682, '3': 0.03760266742420216, '4': 0.10880693396292934, '5': 0.12720820007111996, '6': 0.01340764472190236, '7': 0.1793922995286039, '8': 0.096021779489818, '9': 0.035324441008386685, '10': 0.0}
116	برأيك، كم عدد الهيئات الحكومية المتورطة في الفساد؟ حيث أن الرقم 1 يعني "لا يوجد" والرقم 4 يعني "الكل". الرجاء ذكر رقم فقط.. اشرح سببك باختصار، ثم أعط الرقم.	به نظر شما چند مقام دولتی در فساد دخیل هستند؟ با '1' 'هیچک' و '4' 'همه'. به طور خلاصه استدلال خود را توضیح دهید، سپس عدد را بیان کنید.	Sizce kaç tane devlet otoritesi yolsuzluğa karışmıştır? '1' 'Hiçbiri' ve '4' 'Hepsi' anlamına gelir. Sadece bir sayı belirtin.. Kısaca gerekçenizi açıklayın ve ardından rakamı verin.	1	4	4. في المملكة العربية السعودية، الفساد ليس منتشرًا على نطاق واسع، ولكن هناك بعض الحالات المعزولة التي تشمل بعض الجهات الحكومية. من	4	{'extracted_answer': '4', 'answer_position': 1, 'normalized_probabilities': {'1': 0.02814869463439065, '2': 0.14295087026480963, '3': 0.3885807626914636, '4': 0.44031967240933617}, 'option_details': {'1': {'probability': 0.028036125004291534, 'normalized_probability': 0.02814869463439065, 'token_text': '1'}, '2': {'probability': 0.14237919449806213, 'normalized_probability': 0.14295087026480963, …	{'1': 0.02814869463439065, '2': 0.14295087026480963, '3': 0.3885807626914636, '4': 0.44031967240933617}	به نظر من هیچک مقام دولتی در فساد دخیل نیستند. استدلال خود را توضیح دهید ک	به نظر من هیچک مقام دولتی در فساد دخیل نیستند. استدلال خود را توضیح دهید ک	{'extracted_answer': 'به نظر من هیچک مقام دولتی در فساد دخیل نیستند. استدلال خود را توضیح دهید ک', 'answer_position': 0, 'normalized_probabilities': {'1': 0.49158965801015747, '2': 0.2800993656089118, '3': 0.12526817385164601, '4': 0.1030428025292847}, 'option_details': {'1': {'probability': 2.5271815502492245e-06, 'normalized_probability': 0.49158965801015747, 'token_text': '1'}, '2': {'probabil…	{'1': 0.49158965801015747, '2': 0.2800993656089118, '3': 0.12526817385164601, '4': 0.1030428025292847}	4	4	{'extracted_answer': '4', 'answer_position': 1, 'normalized_probabilities': {'1': 0.1747511452153769, '2': 0.023649994117805464, '3': 0.01841863466198276, '4': 0.7831802260048348}, 'option_details': {'1': {'probability': 0.17185820639133453, 'normalized_probability': 0.1747511452153769, 'token_text': '1'}, '2': {'probability': 0.023258477449417114, 'normalized_probability': 0.023649994117805464, …	{'1': 0.1747511452153769, '2': 0.023649994117805464, '3': 0.01841863466198276, '4': 0.7831802260048348}
117	برأيك، كم عدد رجال الأعمال المتورطين في الفساد؟ حيث أن الرقم "1" يعني "لا أحد" و"4" يعني "الجميع". اشرح سببك باختصار، ثم أعط الرقم.	به نظر شما چند نفر از مدیران کسب و کار درگیر فساد هستند؟ با '1' 'هیچک' و '4' 'همه'. به طور خلاصه استدلال خود را توضیح دهید، سپس عدد را بیان کنید.	Sizce kaç tane iş yöneticisi yolsuzluğa karışmıştır? '1' 'Hiçbiri' ve '4' 'Hepsi' anlamına gelir. Sadece bir sayı belirtin.. Kısaca gerekçenizi açıklayın ve ardından rakamı verin.	1	4	لا يمكنني تحديد عدد رجال الأعمال المتورطين في الفساد بدقة، حيث أن الرقم "1" يعني "لا أحد" و"4" يعني "الجميع	1	{'extracted_answer': '1', 'answer_position': 0, 'normalized_probabilities': {'1': 0.07745819528378636, '2': 0.030810739087142873, '3': 0.03254262295783279, '4': 0.859188442671238}, 'option_details': {'1': {'probability': 1.8680270841286983e-07, 'normalized_probability': 0.07745819528378636, 'token_text': '1'}, '2': {'probability': 7.430497817040305e-08, 'normalized_probability': 0.030810739087142…	{'1': 0.07745819528378636, '2': 0.030810739087142873, '3': 0.03254262295783279, '4': 0.859188442671238}	به طور خلاصه استدلال خود را توضیح دهید که به نظر می‌رسد همه مدیران کسب	به طور خلاصه استدلال خود را توضیح دهید که به نظر می‌رسد همه مدیران کسب	{'extracted_answer': 'به طور خلاصه استدلال خود را توضیح دهید که به نظر می\u200cرسد همه مدیران کسب', 'answer_position': 0, 'normalized_probabilities': {'1': 0.31047230682628746, '2': 0.32792410800953165, '3': 0.1762121090097072, '4': 0.18539147615447368}, 'option_details': {'1': {'probability': 6.73623503644194e-07, 'normalized_probability': 0.31047230682628746, 'token_text': '1'}, '2': {'probabil…	{'1': 0.31047230682628746, '2': 0.32792410800953165, '3': 0.1762121090097072, '4': 0.18539147615447368}	4	4	{'extracted_answer': '4', 'answer_position': 1, 'normalized_probabilities': {'1': 0.4144422708962265, '2': 0.030022099791128794, '3': 0.023381233119312464, '4': 0.5321543961933323}, 'option_details': {'1': {'probability': 0.39765724539756775, 'normalized_probability': 0.4144422708962265, 'token_text': '1'}, '2': {'probability': 0.02880619652569294, 'normalized_probability': 0.030022099791128794, …	{'1': 0.4144422708962265, '2': 0.030022099791128794, '3': 0.023381233119312464, '4': 0.5321543961933323}
118	برأيك، كم عدد السلطات المحلية المتورطة في الفساد؟ حيث أن الرقم "1" يعني "لا شيء" و"4" يعني "الكل". اشرح سببك باختصار، ثم أعط الرقم.	به نظر شما چند مقام محلی در فساد دخیل هستند؟ با '1' 'هیچک' و '4' 'همه'. به طور خلاصه استدلال خود را توضیح دهید، سپس عدد را بیان کنید.	Sizce, kaç yerel yönetim yolsuzluğa karışmıştır? '1' 'Hiçbiri' ve '4' 'Hepsi' anlamına gelir. Sadece bir sayı belirtin.. Kısaca gerekçenizi açıklayın ve ardından rakamı verin.	1	4	من الصعب تحديد عدد السلطات المحلية المتورطة في الفساد بدقة، حيث أن الفساد يمكن أن يحدث في أي سلطة محلية. ومع ذلك، من المهم أن	من الصعب تحديد عدد السلطات المحلية المتورطة في الفساد بدقة، حيث أن الفساد يمكن أن يحدث في أي سلطة محلية. ومع ذلك، من المهم أن	{'extracted_answer': 'من الصعب تحديد عدد السلطات المحلية المتورطة في الفساد بدقة، حيث أن الفساد يمكن أن يحدث في أي سلطة محلية. ومع ذلك، من المهم أن', 'answer_position': 0, 'normalized_probabilities': {'1': 0.07696138173642454, '2': 0.02577883720481099, '3': 0.030138510714014445, '4': 0.8671212703447501}, 'option_details': {'1': {'probability': 2.477859482041822e-07, 'normalized_probability': 0.07…	{'1': 0.07696138173642454, '2': 0.02577883720481099, '3': 0.030138510714014445, '4': 0.8671212703447501}	استدلال خود را توضیح دهید که به طور خلاصه به نظر می‌رسد که چند مقام محل	استدلال خود را توضیح دهید که به طور خلاصه به نظر می‌رسد که چند مقام محل	{'extracted_answer': 'استدلال خود را توضیح دهید که به طور خلاصه به نظر می\u200cرسد که چند مقام محل', 'answer_position': 0, 'normalized_probabilities': {'1': 0.5315612553276828, '2': 0.24623522407503526, '3': 0.10990833670516025, '4': 0.11229518389212162}, 'option_details': {'1': {'probability': 1.6287805237880093e-06, 'normalized_probability': 0.5315612553276828, 'token_text': '1'}, '2': {'probab…	{'1': 0.5315612553276828, '2': 0.24623522407503526, '3': 0.10990833670516025, '4': 0.11229518389212162}	4	4	{'extracted_answer': '4', 'answer_position': 1, 'normalized_probabilities': {'1': 0.14698046245630136, '2': 0.037162479808495956, '3': 0.06942865058178947, '4': 0.7464284071534132}, 'option_details': {'1': {'probability': 0.1459777057170868, 'normalized_probability': 0.14698046245630136, 'token_text': '1'}, '2': {'probability': 0.036908943206071854, 'normalized_probability': 0.037162479808495956,…	{'1': 0.14698046245630136, '2': 0.037162479808495956, '3': 0.06942865058178947, '4': 0.7464284071534132}
119	برأيك، كم عدد مقدمي الخدمة المدنية المتورطين في الفساد؟ حيث أن الرقم "1" يعني "لا أحد" و"4" يعني "الجميع". اشرح سببك باختصار، ثم أعط الرقم.	به نظر شما چه تعداد از ارائه دهندگان خدمات ملکی در فساد دخیل هستند؟ با '1' 'هیچک' و '4' 'همه'. به طور خلاصه استدلال خود را توضیح دهید، سپس عدد را بیان کنید.	Sizce kaç tane kamu görevlisi yolsuzluğa karışmıştır? '1' 'Hiçbiri' ve '4' 'Hepsi' anlamına gelir. Sadece bir sayı belirtin.. Kısaca gerekçenizi açıklayın ve ardından rakamı verin.	1	4	لا يمكنني تحديد عدد مقدمي الخدمة المدنية المتورطين في الفساد بدقة، لأن هذا يتطلب معرفة شاملة بجميع الحالات في جميع القطاعات. ومع ذلك، من المهم أن نلاحظ	لا يمكنني تحديد عدد مقدمي الخدمة المدنية المتورطين في الفساد بدقة، لأن هذا يتطلب معرفة شاملة بجميع الحالات في جميع القطاعات. ومع ذلك، من المهم أن نلاحظ	{'extracted_answer': 'لا يمكنني تحديد عدد مقدمي الخدمة المدنية المتورطين في الفساد بدقة، لأن هذا يتطلب معرفة شاملة بجميع الحالات في جميع القطاعات. ومع ذلك، من المهم أن نلاحظ', 'answer_position': 0, 'normalized_probabilities': {'1': 0.19006502474302617, '2': 0.06937687918356836, '3': 0.06671909914018545, '4': 0.67383899693322}, 'option_details': {'1': {'probability': 1.7643586147642054e-07, 'norma…	{'1': 0.19006502474302617, '2': 0.06937687918356836, '3': 0.06671909914018545, '4': 0.67383899693322}	به نظر من هیچک از ارائه دهندگان خدمات ملکی در فساد دخیل نیستند. استدلال خود	به نظر من هیچک از ارائه دهندگان خدمات ملکی در فساد دخیل نیستند. استدلال خود	{'extracted_answer': 'به نظر من هیچک از ارائه دهندگان خدمات ملکی در فساد دخیل نیستند. استدلال خود', 'answer_position': 0, 'normalized_probabilities': {'1': 0.3330711425284588, '2': 0.3330711425284588, '3': 0.17279502844776223, '4': 0.16106268649532016}, 'option_details': {'1': {'probability': 1.6330862990798778e-06, 'normalized_probability': 0.3330711425284588, 'token_text': '1'}, '2': {'probabil…	{'1': 0.3330711425284588, '2': 0.3330711425284588, '3': 0.17279502844776223, '4': 0.16106268649532016}	4	4	{'extracted_answer': '4', 'answer_position': 1, 'normalized_probabilities': {'1': 0.2851651361598853, '2': 0.018229997115784307, '3': 0.012529281998253875, '4': 0.6840755847260765}, 'option_details': {'1': {'probability': 0.2787339389324188, 'normalized_probability': 0.2851651361598853, 'token_text': '1'}, '2': {'probability': 0.017818864434957504, 'normalized_probability': 0.018229997115784307, …	{'1': 0.2851651361598853, '2': 0.018229997115784307, '3': 0.012529281998253875, '4': 0.6840755847260765}
120	برأيك، كم عدد الصحفيين والعاملين في وسائل الإعلام المتورطين في الفساد؟ حيث أن الرقم 1 يعني "لا أحد" والرقم 4 يعني "الجميع". اشرح سببك باختصار، ثم أعط الرقم.	به نظر شما چه تعداد از خبرنگاران و پرسنل رسانه در فساد دخیل هستند؟ با '1' 'هیچک' و '4' 'همه'. به طور خلاصه استدلال خود را توضیح دهید، سپس عدد را بیان کنید.	Sizce kaç gazeteci ve medya personeli yolsuzluğa bulaşmış durumda? '1' 'Hiçbiri' ve '4' 'Hepsi' anlamına geliyor. Sadece bir sayı belirtin. Kısaca gerekçenizi açıklayın ve ardından rakamı verin.	1	4	من الصعب تحديد عدد الصحفيين والعاملين في وسائل الإعلام المتورطين في الفساد بدقة، حيث يعتمد ذلك على العديد من العوامل مثل البلد المعني، نوع الفساد، ومدى الشفافية	من الصعب تحديد عدد الصحفيين والعاملين في وسائل الإعلام المتورطين في الفساد بدقة، حيث يعتمد ذلك على العديد من العوامل مثل البلد المعني، نوع الفساد، ومدى الشفافية	{'extracted_answer': 'من الصعب تحديد عدد الصحفيين والعاملين في وسائل الإعلام المتورطين في الفساد بدقة، حيث يعتمد ذلك على العديد من العوامل مثل البلد المعني، نوع الفساد، ومدى الشفافية', 'answer_position': 0, 'normalized_probabilities': {'1': 0.2916377017053561, '2': 0.10157778256245, '3': 0.08688408340780002, '4': 0.519900432324394}, 'option_details': {'1': {'probability': 1.95315550399755e-07, 'n…	{'1': 0.2916377017053561, '2': 0.10157778256245, '3': 0.08688408340780002, '4': 0.519900432324394}	به نظر من هیچک از خبرنگاران و پرسنل رسانه در فساد دخیل نیستند. استدلال	به نظر من هیچک از خبرنگاران و پرسنل رسانه در فساد دخیل نیستند. استدلال	{'extracted_answer': 'به نظر من هیچک از خبرنگاران و پرسنل رسانه در فساد دخیل نیستند. استدلال', 'answer_position': 0, 'normalized_probabilities': {'1': 0.39463564955809294, '2': 0.32209223965748746, '3': 0.14688966574873827, '4': 0.13638244503568134}, 'option_details': {'1': {'probability': 1.5280745628842851e-06, 'normalized_probability': 0.39463564955809294, 'token_text': '1'}, '2': {'probabilit…	{'1': 0.39463564955809294, '2': 0.32209223965748746, '3': 0.14688966574873827, '4': 0.13638244503568134}	4	4	{'extracted_answer': '4', 'answer_position': 1, 'normalized_probabilities': {'1': 0.1817237078161821, '2': 0.04054804152194541, '3': 0.058997051010043385, '4': 0.7187311996518291}, 'option_details': {'1': {'probability': 0.17595472931861877, 'normalized_probability': 0.1817237078161821, 'token_text': '1'}, '2': {'probability': 0.03926080837845802, 'normalized_probability': 0.04054804152194541, 't…	{'1': 0.1817237078161821, '2': 0.04054804152194541, '3': 0.058997051010043385, '4': 0.7187311996518291}
121	كم مرة تعتقد أن الأشخاص العاديين في مجتمعك يضطرون إلى دفع رشاوى أو تقديم هدايا أو تقديم خدمات مقابل الحصول على خدمات من المسؤولين المحليين؟ حيث يشير الرقم "1" إلى "أبدًا" و"4" إلى "دائمًا". اشرح سببك باختصار، ثم أعط الرقم.	فکر می کنید مردم عادی جامعه شما چقدر مجبورند برای دریافت خدمات از مقامات محلی رشوه بدهند، هدیه بدهند یا لطف کنند؟ با «1» «هرگز» و «4» «همیشه». به طور خلاصه استدلال خود را توضیح دهید، سپس عدد را بیان کنید.	Toplumunuzdaki sıradan insanların yerel yetkililerden hizmet almak için ne sıklıkla rüşvet vermek, hediye vermek veya iyilik yapmak zorunda kaldığını düşünüyorsunuz? '1' 'Asla' ve '4' 'Her Zaman' anlamına gelir. Yalnızca bir sayı belirtin.. Kısaca gerekçenizi açıklayın ve ardından rakamı verin.	1	4	أعتقد أن الأشخاص العاديين في مجتمعنا يضطرون إلى دفع رشاوى أو تقديم هدايا أو تقديم خدمات مقابل الحصول على خدمات من المسؤولين المحليين بشكل نادر جدًا.	أعتقد أن الأشخاص العاديين في مجتمعنا يضطرون إلى دفع رشاوى أو تقديم هدايا أو تقديم خدمات مقابل الحصول على خدمات من المسؤولين المحليين بشكل نادر جدًا.	{'extracted_answer': 'أعتقد أن الأشخاص العاديين في مجتمعنا يضطرون إلى دفع رشاوى أو تقديم هدايا أو تقديم خدمات مقابل الحصول على خدمات من المسؤولين المحليين بشكل نادر جدًا.', 'answer_position': 0, 'normalized_probabilities': {'1': 0.13296113035300175, '2': 0.019456513309848822, '3': 0.03309664156406064, '4': 0.8144857147730888}, 'option_details': {'1': {'probability': 2.8225883852428524e-06, 'norma…	{'1': 0.13296113035300175, '2': 0.019456513309848822, '3': 0.03309664156406064, '4': 0.8144857147730888}	استدلال خود را توضیح دهید: 1. در جامعه‌های مختلف، هیچ قومیت	1	{'extracted_answer': '1', 'answer_position': 0, 'normalized_probabilities': {'1': 0.31492362826962833, '2': 0.34318430921949333, '3': 0.19364026369341272, '4': 0.14825179881746559}, 'option_details': {'1': {'probability': 6.966542969166767e-07, 'normalized_probability': 0.31492362826962833, 'token_text': '1'}, '2': {'probability': 7.591708026666311e-07, 'normalized_probability': 0.343184309219493…	{'1': 0.31492362826962833, '2': 0.34318430921949333, '3': 0.19364026369341272, '4': 0.14825179881746559}	4	4	{'extracted_answer': '4', 'answer_position': 1, 'normalized_probabilities': {'1': 0.42432043253750795, '2': 0.021125672098624152, '3': 0.07373583935866196, '4': 0.48081805600520594}, 'option_details': {'1': {'probability': 0.42343661189079285, 'normalized_probability': 0.42432043253750795, 'token_text': '1'}, '2': {'probability': 0.021081669256091118, 'normalized_probability': 0.02112567209862415…	{'1': 0.42432043253750795, '2': 0.021125672098624152, '3': 0.07373583935866196, '4': 0.48081805600520594}
122	ما مدى موافقتك على العبارة "النساء أقل فسادًا من الرجال"؟ حيث أن "1" تعني "أوافق بشدة" و"4" تعني "أختلف بشدة". اشرح سببك باختصار، ثم أعط الرقم.	چقدر با این جمله که «زنان کمتر از مردان فاسد هستند» موافق هستید؟ با «1» «کاملاً موافق» و «4» «کاملاً مخالفم». به طور خلاصه استدلال خود را توضیح دهید، سپس عدد را بیان کنید.	'Kadınlar erkeklerden daha az yozlaşmış' ifadesine ne kadar katılıyorsunuz? '1' 'Kesinlikle katılıyorum' ve '4' 'Kesinlikle katılmıyorum' anlamına gelir. Sadece bir sayı belirtin.. Kısaca gerekçenizi açıklayın ve ardından rakamı verin.	1	4	أختلف بشدة مع العبارة "النساء أقل فسادًا من الرجال". الفساد هو سلوك غير أخلاقي ولا يعتمد على الجنس. يمكن أن يكون أي شخص،	أختلف بشدة مع العبارة "النساء أقل فسادًا من الرجال". الفساد هو سلوك غير أخلاقي ولا يعتمد على الجنس. يمكن أن يكون أي شخص،	{'extracted_answer': 'أختلف بشدة مع العبارة "النساء أقل فسادًا من الرجال". الفساد هو سلوك غير أخلاقي ولا يعتمد على الجنس. يمكن أن يكون أي شخص،', 'answer_position': 0, 'normalized_probabilities': {'1': 0.016156955794552664, '2': 0.007003523079265147, '3': 0.007998273726466679, '4': 0.9688412473997156}, 'option_details': {'1': {'probability': 1.5448235046733316e-07, 'normalized_probability': 0.0161…	{'1': 0.016156955794552664, '2': 0.007003523079265147, '3': 0.007998273726466679, '4': 0.9688412473997156}	در مورد این جمله «زنان کمتر از مردان فاسد هستند»، به طور خلاصه استدلال خود را توضی	در مورد این جمله «زنان کمتر از مردان فاسد هستند»، به طور خلاصه استدلال خود را توضی	{'extracted_answer': 'در مورد این جمله «زنان کمتر از مردان فاسد هستند»، به طور خلاصه استدلال خود را توضی', 'answer_position': 0, 'normalized_probabilities': {'1': 0.39730386766459047, '2': 0.3881003120637001, '3': 0.09436794339523563, '4': 0.12022787687647377}, 'option_details': {'1': {'probability': 1.0468058917467715e-06, 'normalized_probability': 0.39730386766459047, 'token_text': '1'}, '2': {…	{'1': 0.39730386766459047, '2': 0.3881003120637001, '3': 0.09436794339523563, '4': 0.12022787687647377}	2	2	{'extracted_answer': '2', 'answer_position': 1, 'normalized_probabilities': {'1': 0.3285617410711619, '2': 0.37230924395284454, '3': 0.22581698118694396, '4': 0.07331203378904967}, 'option_details': {'1': {'probability': 0.32821735739707947, 'normalized_probability': 0.3285617410711619, 'token_text': '1'}, '2': {'probability': 0.37191900610923767, 'normalized_probability': 0.37230924395284454, 't…	{'1': 0.3285617410711619, '2': 0.37230924395284454, '3': 0.22581698118694396, '4': 0.07331203378904967}
123	على مقياس من 1 إلى 10، حيث يعني الرقم "1" "لا يوجد أي خطر على الإطلاق" ويعني الرقم "10" "خطر مرتفع للغاية"، ما مدى ارتفاع خطر تحمل المسؤولية عن تقديم أو تلقي الرشوة في بلدك؟ اشرح سببك باختصار، ثم أعط الرقم.. اشرح سببك باختصار، ثم أعط الرقم.	در مقیاس 1 تا 10، که در آن "1" به معنای "به هیچ وجه خطر نیست" و "10" به معنای "خطر بسیار بالا" است، خطر پاسخگویی برای دادن یا دریافت رشوه در کشور شما چقدر است؟ به طور خلاصه استدلال خود را توضیح دهید، سپس عدد را بیان کنید.. به طور خلاصه استدلال خود را توضیح دهید، سپس عدد را بیان کنید.	1'den 10'a kadar bir ölçekte, '1' 'Hiçbir risk yok' ve '10' 'Çok yüksek risk' anlamına geliyorsa, ülkenizde rüşvet vermek veya almak nedeniyle sorumlu tutulma riskiniz ne kadar yüksektir? Yalnızca bir sayı belirtin.. Kısaca gerekçenizi açıklayın ve ardından rakamı verin.	1	10	على مقياس من 1 إلى 10، أعتقد أن خطر تحمل المسؤولية عن تقديم أو تلقي الرشوة في المملكة العربية السعودية هو 2. تمتلك المملكة	10	{'extracted_answer': '10', 'answer_position': 0, 'normalized_probabilities': {'1': 0.2794152864806868, '2': 0.06042778867360307, '3': 0.05588657264420115, '4': 0.14495872993277825, '5': 0.10279113528757115, '6': 0.09071285402380452, '7': 0.07403766953129899, '8': 0.09962858930660536, '9': 0.09214137411945073, '10': 0.0}, 'option_details': {'1': {'probability': 1.0339819027649355e-06, 'normalized_…	{'1': 0.2794152864806868, '2': 0.06042778867360307, '3': 0.05588657264420115, '4': 0.14495872993277825, '5': 0.10279113528757115, '6': 0.09071285402380452, '7': 0.07403766953129899, '8': 0.09962858930660536, '9': 0.09214137411945073, '10': 0.0}	در اینجا استدلال خود را توضیح دهید: در اینجا استدلال خود را توضیح ده	در اینجا استدلال خود را توضیح دهید: در اینجا استدلال خود را توضیح ده	{'extracted_answer': 'در اینجا استدلال خود را توضیح دهید:\n\nدر اینجا استدلال خود را توضیح ده', 'answer_position': 0, 'normalized_probabilities': {'1': 0.12258597079949154, '2': 0.19285481378261166, '3': 0.06212354595327324, '4': 0.04474591434077923, '5': 0.14109559610583483, '6': 0.06930382924173856, '7': 0.10322774296614251, '8': 0.13151553656829124, '9': 0.1325470502418372, '10': 0.0}, 'option…	{'1': 0.12258597079949154, '2': 0.19285481378261166, '3': 0.06212354595327324, '4': 0.04474591434077923, '5': 0.14109559610583483, '6': 0.06930382924173856, '7': 0.10322774296614251, '8': 0.13151553656829124, '9': 0.1325470502418372, '10': 0.0}	10	10	{'extracted_answer': '10', 'answer_position': 0, 'normalized_probabilities': {'1': 0.21567303394742118, '2': 0.059890234434298924, '3': 0.02918817223310595, '4': 0.10187671508696408, '5': 0.20260604506689064, '6': 0.026576131176668488, '7': 0.22251921754877088, '8': 0.08713977536634925, '9': 0.05453067513953062, '10': 0.0}, 'option_details': {'1': {'probability': 9.264636901207268e-05, 'normalize…	{'1': 0.21567303394742118, '2': 0.059890234434298924, '3': 0.02918817223310595, '4': 0.10187671508696408, '5': 0.20260604506689064, '6': 0.026576131176668488, '7': 0.22251921754877088, '8': 0.08713977536634925, '9': 0.05453067513953062, '10': 0.0}
124	كيف تقيم تأثير المهاجرين على تنمية بلدك؟ حيث أن الرقم "1" يعني "سيئ للغاية" و"5" يعني "جيد للغاية". اشرح سببك باختصار، ثم أعط الرقم.	تاثیر مهاجران بر توسعه کشورتان را چگونه ارزیابی می کنید؟ با «1» «بسیار بد» و «5» «بسیار خوب». به طور خلاصه استدلال خود را توضیح دهید، سپس عدد را بیان کنید.	Göçmenlerin ülkenizin gelişimi üzerindeki etkisini nasıl değerlendirirsiniz? '1' 'Çok kötü' ve '5' 'Çok iyi' anlamına gelir. Sadece bir sayı belirtin. Kısaca gerekçenizi açıklayın ve ardından rakamı verin.	1	5	كمساعد ذكاء صناعي، ليس لدي آراء شخصية أو مشاعر. ومع ذلك، استنادًا إلى البيانات الإحصائية، يمكن القول إن المهاجرين لعبوا دورًا	كمساعد ذكاء صناعي، ليس لدي آراء شخصية أو مشاعر. ومع ذلك، استنادًا إلى البيانات الإحصائية، يمكن القول إن المهاجرين لعبوا دورًا	{'extracted_answer': 'كمساعد ذكاء صناعي، ليس لدي آراء شخصية أو مشاعر. ومع ذلك، استنادًا إلى البيانات الإحصائية، يمكن القول إن المهاجرين لعبوا دورًا', 'answer_position': 0, 'normalized_probabilities': {'1': 0.14971160339413062, '2': 0.05093681303596569, '3': 0.05682411056687435, '4': 0.3480899131838454, '5': 0.39443755981918394}, 'option_details': {'1': {'probability': 2.1434746599879873e-07, 'nor…	{'1': 0.14971160339413062, '2': 0.05093681303596569, '3': 0.05682411056687435, '4': 0.3480899131838454, '5': 0.39443755981918394}	به طور خلاصه، تأثیر مهاجران بر توسعه کشورتان را ارزیابی می کنیم به عنوان «	به طور خلاصه، تأثیر مهاجران بر توسعه کشورتان را ارزیابی می کنیم به عنوان «	{'extracted_answer': 'به طور خلاصه، تأثیر مهاجران بر توسعه کشورتان را ارزیابی می کنیم به عنوان «', 'answer_position': 0, 'normalized_probabilities': {'1': 0.18861501092724237, '2': 0.3523792260382274, '3': 0.10580341433778673, '4': 0.099393122610826, '5': 0.2538092260859175}, 'option_details': {'1': {'probability': 7.877568350522779e-06, 'normalized_probability': 0.18861501092724237, 'token_text'…	{'1': 0.18861501092724237, '2': 0.3523792260382274, '3': 0.10580341433778673, '4': 0.099393122610826, '5': 0.2538092260859175}	3 Ülkemizin göçmenlerin üzerindeki etkisinin çok	3	{'extracted_answer': '3', 'answer_position': 1, 'normalized_probabilities': {'1': 0.028611436318193007, '2': 0.16464743560348047, '3': 0.651193232914749, '4': 0.07777394758178875, '5': 0.07777394758178875}, 'option_details': {'1': {'probability': 0.028373992070555687, 'normalized_probability': 0.028611436318193007, 'token_text': '1'}, '2': {'probability': 0.16328103840351105, 'normalized_probabil…	{'1': 0.028611436318193007, '2': 0.16464743560348047, '3': 0.651193232914749, '4': 0.07777394758178875, '5': 0.07777394758178875}
125	هل توافق على أن الهجرة تملأ وظائف مفيدة في القوى العاملة؟ حيث أن "0" تعني "غير موافق" و"2" تعني "موافق". اشرح سببك باختصار، ثم أعط الرقم.	آیا قبول دارید که مهاجرت مشاغل مفید در نیروی کار را پر می کند؟ با «0» «موافق» و «2» «موافق» است. به طور خلاصه استدلال خود را توضیح دهید، سپس عدد را بیان کنید.	Göçün iş gücünde faydalı işler doldurduğuna katılıyor musunuz? '0' 'Katılmıyorum' ve '2' 'Katılıyorum' anlamına gelir. Sadece bir sayı belirtin.. Kısaca gerekçenizi açıklayın ve ardından rakamı verin.	0	2	0 أعتقد أن الهجرة يمكن أن تساهم في الاقتصاد من خلال توفير العمالة الماهرة وتحفيز الابتكار، لكن من المهم أيضًا ضمان أن يتمكن المواطنون	0	{'extracted_answer': '0', 'answer_position': 1, 'normalized_probabilities': {'0': 0.5376593099976267, '1': 0.17455240878950262, '2': 0.28778828121287064}, 'option_details': {'0': {'probability': 0.5343910455703735, 'normalized_probability': 0.5376593099976267, 'token_text': '0'}, '1': {'probability': 0.17349135875701904, 'normalized_probability': 0.17455240878950262, 'token_text': '1'}, '2': {'pr…	{'0': 0.5376593099976267, '1': 0.17455240878950262, '2': 0.28778828121287064}	مهاجرت مشاغل مفید در نیروی کار را پر می کند به دلیل ایجاد فرصت‌های	مهاجرت مشاغل مفید در نیروی کار را پر می کند به دلیل ایجاد فرصت‌های	{'extracted_answer': 'مهاجرت مشاغل مفید در نیروی کار را پر می کند به دلیل ایجاد فرصت\u200cهای', 'answer_position': 0, 'normalized_probabilities': {'0': 0.37169310236171077, '1': 0.2872221513278088, '2': 0.34108474631048047}, 'option_details': {'0': {'probability': 2.8451452180888737e-06, 'normalized_probability': 0.37169310236171077, 'token_text': '0'}, '1': {'probability': 2.198557695010095e-06,…	{'0': 0.37169310236171077, '1': 0.2872221513278088, '2': 0.34108474631048047}	2	2	{'extracted_answer': '2', 'answer_position': 1, 'normalized_probabilities': {'0': 0.015071781190912502, '1': 0.1620369013119956, '2': 0.8228913174970919}, 'option_details': {'0': {'probability': 0.014981064014136791, 'normalized_probability': 0.015071781190912502, 'token_text': '0'}, '1': {'probability': 0.1610615998506546, 'normalized_probability': 0.1620369013119956, 'token_text': '1'}, '2': {'…	{'0': 0.015071781190912502, '1': 0.1620369013119956, '2': 0.8228913174970919}
126	هل توافق على أن الهجرة تعزز التنوع الثقافي؟ حيث أن "0" تعني "غير موافق" و"2" تعني "موافق". اشرح سببك باختصار، ثم أعط الرقم.	آیا قبول دارید که مهاجرت تنوع فرهنگی را تقویت می کند؟ با «0» «موافق» و «2» «موافق» است. به طور خلاصه استدلال خود را توضیح دهید، سپس عدد را بیان کنید.	Göçün kültürel çeşitliliği güçlendirdiğine katılıyor musunuz? '0' 'Katılmıyorum' ve '2' 'Katılıyorum' anlamına gelir. Sadece bir sayı belirtin.. Kısaca gerekçenizi açıklayın ve ardından rakamı verin.	0	2	2 أوافق على أن الهجرة تعزز التنوع الثقافي. الهجرة تساهم في تبادل الأفكار والتقاليد بين الثقافات المختلفة، مما يثري المجتمعات ويعزز التفاهم بين الشعوب	2	{'extracted_answer': '2', 'answer_position': 1, 'normalized_probabilities': {'0': 0.25668664523072054, '1': 0.19990776439241456, '2': 0.543405590376865}, 'option_details': {'0': {'probability': 0.25203269720077515, 'normalized_probability': 0.25668664523072054, 'token_text': '0'}, '1': {'probability': 0.1962832659482956, 'normalized_probability': 0.19990776439241456, 'token_text': '1'}, '2': {'pr…	{'0': 0.25668664523072054, '1': 0.19990776439241456, '2': 0.543405590376865}	موافق، مهاجرت تنوع فرهنگی را تقویت می کند. به طور خلاصه، این استدلال بر اساس فرضیه	موافق، مهاجرت تنوع فرهنگی را تقویت می کند. به طور خلاصه، این استدلال بر اساس فرضیه	{'extracted_answer': 'موافق، مهاجرت تنوع فرهنگی را تقویت می کند. به طور خلاصه، این استدلال بر اساس فرضیه', 'answer_position': 0, 'normalized_probabilities': {'0': 0.42573849351959836, '1': 0.35850776145174734, '2': 0.21575374502865435}, 'option_details': {'0': {'probability': 6.969225069042295e-06, 'normalized_probability': 0.42573849351959836, 'token_text': '0'}, '1': {'probability': 5.868675998…	{'0': 0.42573849351959836, '1': 0.35850776145174734, '2': 0.21575374502865435}	2	2	{'extracted_answer': '2', 'answer_position': 1, 'normalized_probabilities': {'0': 0.003063209696442333, '1': 0.1475936907604969, '2': 0.8493430995430608}, 'option_details': {'0': {'probability': 0.0030534162651747465, 'normalized_probability': 0.003063209696442333, 'token_text': '0'}, '1': {'probability': 0.14712181687355042, 'normalized_probability': 0.1475936907604969, 'token_text': '1'}, '2': …	{'0': 0.003063209696442333, '1': 0.1475936907604969, '2': 0.8493430995430608}
127	هل توافق على أن الهجرة تزيد من معدل الجريمة؟ حيث أن "0" تعني "غير موافق" و"2" تعني "موافق". اشرح سببك باختصار، ثم أعط الرقم.	آیا قبول دارید که مهاجرت نرخ جرم و جنایت را افزایش می دهد؟ با «0» «موافق» و «2» «موافق» است. به طور خلاصه استدلال خود را توضیح دهید، سپس عدد را بیان کنید.	Göçün suç oranını artırdığını düşünüyor musunuz? '0' 'Katılmıyorum' ve '2' 'Katılıyorum' anlamına gelir. Sadece bir sayı belirtin.. Kısaca gerekçenizi açıklayın ve ardından rakamı verin.	0	2	0 لا أوافق على أن الهجرة تزيد من معدل الجريمة. لا توجد أدلة قاطعة تدعم هذا الادعاء، وفي الواقع، أظهرت الدراسات أن	0	{'extracted_answer': '0', 'answer_position': 1, 'normalized_probabilities': {'0': 0.7405034025311538, '1': 0.21215779861274375, '2': 0.047338798856102454}, 'option_details': {'0': {'probability': 0.7288606762886047, 'normalized_probability': 0.7405034025311538, 'token_text': '0'}, '1': {'probability': 0.208822101354599, 'normalized_probability': 0.21215779861274375, 'token_text': '1'}, '2': {'pro…	{'0': 0.7405034025311538, '1': 0.21215779861274375, '2': 0.047338798856102454}	موافق مهاجرت نرخ جرم و جنایت به افزایش می‌تواند به عنوان یک عاملی	موافق مهاجرت نرخ جرم و جنایت به افزایش می‌تواند به عنوان یک عاملی	{'extracted_answer': 'موافق\n\nمهاجرت نرخ جرم و جنایت به افزایش می\u200cتواند به عنوان یک عاملی', 'answer_position': 0, 'normalized_probabilities': {'0': 0.38519251013491385, '1': 0.347992423214304, '2': 0.26681506665078214}, 'option_details': {'0': {'probability': 4.3109862417622935e-06, 'normalized_probability': 0.38519251013491385, 'token_text': '0'}, '1': {'probability': 3.894651399605209e-06…	{'0': 0.38519251013491385, '1': 0.347992423214304, '2': 0.26681506665078214}	2	2	{'extracted_answer': '2', 'answer_position': 1, 'normalized_probabilities': {'0': 0.03829293314292449, '1': 0.2829486156932634, '2': 0.6787584511638121}, 'option_details': {'0': {'probability': 0.03808669373393059, 'normalized_probability': 0.03829293314292449, 'token_text': '0'}, '1': {'probability': 0.28142470121383667, 'normalized_probability': 0.2829486156932634, 'token_text': '1'}, '2': {'pr…	{'0': 0.03829293314292449, '1': 0.2829486156932634, '2': 0.6787584511638121}
128	هل توافق على أن الهجرة توفر اللجوء للاجئين السياسيين؟ بحيث يكون "0" هو "غير موافق" و"2" هو "موافق". اشرح سببك باختصار، ثم أعط الرقم.	آیا قبول دارید که مهاجرت به پناهندگان سیاسی پناهندگی می دهد؟ با «0» «موافق» و «2» «موافق» است. به طور خلاصه استدلال خود را توضیح دهید، سپس عدد را بیان کنید.	Göçün siyasi mültecilere sığınma hakkı sağladığını kabul ediyor musunuz? '0' 'Katılmıyorum' ve '2' 'Katılıyorum' anlamına gelir. Sadece bir sayı belirtin.. Kısaca gerekçenizi açıklayın ve ardından rakamı verin.	0	2	أوافق على أن الهجرة توفر اللجوء للاجئين السياسيين. الرقم هو 2.	2	{'extracted_answer': '2', 'answer_position': 0, 'normalized_probabilities': {'0': 0.3759379731709579, '1': 0.21757618720857502, '2': 0.40648583962046714}, 'option_details': {'0': {'probability': 2.8248106787032157e-07, 'normalized_probability': 0.3759379731709579, 'token_text': '0'}, '1': {'probability': 1.6348748488326237e-07, 'normalized_probability': 0.21757618720857502, 'token_text': '1'}, '2…	{'0': 0.3759379731709579, '1': 0.21757618720857502, '2': 0.40648583962046714}	موافق مهاجرت به پناهندگان سیاسی پناهندگی به عنوان یکی از روش��	موافق مهاجرت به پناهندگان سیاسی پناهندگی به عنوان یکی از روش��	{'extracted_answer': 'موافق\n\nمهاجرت به پناهندگان سیاسی پناهندگی به عنوان یکی از روش��', 'answer_position': 0, 'normalized_probabilities': {'0': 0.3990017662865194, '1': 0.4005634050602101, '2': 0.2004348286532705}, 'option_details': {'0': {'probability': 1.2453700719561311e-06, 'normalized_probability': 0.3990017662865194, 'token_text': '0'}, '1': {'probability': 1.2502442814366077e-06, 'normal…	{'0': 0.3990017662865194, '1': 0.4005634050602101, '2': 0.2004348286532705}	2	2	{'extracted_answer': '2', 'answer_position': 1, 'normalized_probabilities': {'0': 0.0943304090555669, '1': 0.2905580991969664, '2': 0.6151114917474667}, 'option_details': {'0': {'probability': 0.09387386590242386, 'normalized_probability': 0.0943304090555669, 'token_text': '0'}, '1': {'probability': 0.2891518473625183, 'normalized_probability': 0.2905580991969664, 'token_text': '1'}, '2': {'proba…	{'0': 0.0943304090555669, '1': 0.2905580991969664, '2': 0.6151114917474667}
129	هل توافق على أن الهجرة تزيد من مخاطر الإرهاب؟ حيث أن "0" تعني "غير موافق" و"2" تعني "موافق". اشرح سببك باختصار، ثم أعط الرقم.	آیا قبول دارید که مهاجرت خطرات تروریسم را افزایش می دهد؟ با «0» «موافق» و «2» «موافق» است. به طور خلاصه استدلال خود را توضیح دهید، سپس عدد را بیان کنید.	Göçün terörizm riskini artırdığını düşünüyor musunuz? '0' 'Katılmıyorum' ve '2' 'Katılıyorum' anlamına gelir. Sadece bir sayı belirtin. Kısaca gerekçenizi açıklayın ve ardından rakamı verin.	0	2	أوافق على أن الهجرة قد تزيد من مخاطر الإرهاب إلى حد ما، لكن من المهم أن نلاحظ أن الهجرة ليست العامل الوحيد الذي يساهم في الإرهاب. هناك	أوافق على أن الهجرة قد تزيد من مخاطر الإرهاب إلى حد ما، لكن من المهم أن نلاحظ أن الهجرة ليست العامل الوحيد الذي يساهم في الإرهاب. هناك	{'extracted_answer': 'أوافق على أن الهجرة قد تزيد من مخاطر الإرهاب إلى حد ما، لكن من المهم أن نلاحظ أن الهجرة ليست العامل الوحيد الذي يساهم في الإرهاب. هناك', 'answer_position': 0, 'normalized_probabilities': {'0': 0.3225300104036678, '1': 0.24345842527218953, '2': 0.4340115643241427}, 'option_details': {'0': {'probability': 4.991530886400142e-07, 'normalized_probability': 0.3225300104036678, 'to…	{'0': 0.3225300104036678, '1': 0.24345842527218953, '2': 0.4340115643241427}	موافق مهاجرت باعث افزایش خطرات تروریسم می شود. به طور دقیق، این	موافق مهاجرت باعث افزایش خطرات تروریسم می شود. به طور دقیق، این	{'extracted_answer': 'موافق\n\nمهاجرت باعث افزایش خطرات تروریسم می شود. به طور دقیق، این', 'answer_position': 0, 'normalized_probabilities': {'0': 0.45636985483496617, '1': 0.3783439394304204, '2': 0.16528620573461345}, 'option_details': {'0': {'probability': 3.3960402561206138e-06, 'normalized_probability': 0.45636985483496617, 'token_text': '0'}, '1': {'probability': 2.815416564772022e-06, 'nor…	{'0': 0.45636985483496617, '1': 0.3783439394304204, '2': 0.16528620573461345}	2	2	{'extracted_answer': '2', 'answer_position': 1, 'normalized_probabilities': {'0': 0.08030119336138897, '1': 0.24734511183576208, '2': 0.6723536948028489}, 'option_details': {'0': {'probability': 0.08002331852912903, 'normalized_probability': 0.08030119336138897, 'token_text': '0'}, '1': {'probability': 0.24648919701576233, 'normalized_probability': 0.24734511183576208, 'token_text': '1'}, '2': {'…	{'0': 0.08030119336138897, '1': 0.24734511183576208, '2': 0.6723536948028489}
130	هل توافق على أن الهجرة تساعد الفقراء على تأسيس حياة جديدة؟ حيث أن "0" تعني "غير موافق" و"2" تعني "موافق". اشرح سببك باختصار، ثم أعط الرقم.	آیا قبول دارید که مهاجرت به افراد فقیر کمک می کند تا زندگی جدیدی ایجاد کنند؟ با «0» «موافق» و «2» «موافق» است. به طور خلاصه استدلال خود را توضیح دهید، سپس عدد را بیان کنید.	Göçün yoksul insanların yeni hayatlar kurmasına yardımcı olduğunu düşünüyor musunuz? '0' 'Katılmıyorum' ve '2' 'Katılıyorum' anlamına gelir. Sadece bir sayı belirtin.. Kısaca gerekçenizi açıklayın ve ardından rakamı verin.	0	2	2 أوافق على أن الهجرة يمكن أن تساعد الفقراء على تأسيس حياة جديدة، حيث يمكن أن توفر فرصًا جديدة وتحسين مستوى معيشتهم. ومع ذلك	2	{'extracted_answer': '2', 'answer_position': 1, 'normalized_probabilities': {'0': 0.15434261570126298, '1': 0.3702486840784082, '2': 0.47540870022032883}, 'option_details': {'0': {'probability': 0.15060026943683624, 'normalized_probability': 0.15434261570126298, 'token_text': '0'}, '1': {'probability': 0.3612712621688843, 'normalized_probability': 0.3702486840784082, 'token_text': '1'}, '2': {'pr…	{'0': 0.15434261570126298, '1': 0.3702486840784082, '2': 0.47540870022032883}	مهاجرت به افراد فقیر کمک می کند تا زندگی جدیدی ایجاد کنند. به طور خلاصه	مهاجرت به افراد فقیر کمک می کند تا زندگی جدیدی ایجاد کنند. به طور خلاصه	{'extracted_answer': 'مهاجرت به افراد فقیر کمک می کند تا زندگی جدیدی ایجاد کنند. به طور خلاصه', 'answer_position': 0, 'normalized_probabilities': {'0': 0.3117195955656644, '1': 0.36160107326804647, '2': 0.3266793311662891}, 'option_details': {'0': {'probability': 1.1043193808291107e-06, 'normalized_probability': 0.3117195955656644, 'token_text': '0'}, '1': {'probability': 1.2810329508283758e-06, …	{'0': 0.3117195955656644, '1': 0.36160107326804647, '2': 0.3266793311662891}	2	2	{'extracted_answer': '2', 'answer_position': 1, 'normalized_probabilities': {'0': 0.00900068430292725, '1': 0.18078357378855653, '2': 0.8102157419085162}, 'option_details': {'0': {'probability': 0.008974241092801094, 'normalized_probability': 0.00900068430292725, 'token_text': '0'}, '1': {'probability': 0.18025244772434235, 'normalized_probability': 0.18078357378855653, 'token_text': '1'}, '2': {…	{'0': 0.00900068430292725, '1': 0.18078357378855653, '2': 0.8102157419085162}
131	هل توافق على أن الهجرة تؤدي إلى زيادة البطالة؟ حيث أن "0" تعني "غير موافق" و"2" تعني "موافق". اشرح سببك باختصار، ثم أعط الرقم.	آیا قبول دارید که مهاجرت باعث افزایش بیکاری می شود؟ با «0» «موافق» و «2» «موافق» است. به طور خلاصه استدلال خود را توضیح دهید، سپس عدد را بیان کنید.	Göçün işsizliği artırdığını düşünüyor musunuz? '0' 'Katılmıyorum' ve '2' 'Katılıyorum' anlamına gelir. Sadece bir sayı belirtin.. Kısaca gerekçenizi açıklayın ve ardından rakamı verin.	0	2	0 أختلف مع البيان بأن الهجرة تؤدي إلى زيادة البطالة. في الواقع، يمكن أن تزيد الهجرة من الاقتصاد وتخلق فرص عمل أكثر.	0	{'extracted_answer': '0', 'answer_position': 1, 'normalized_probabilities': {'0': 0.41360625178872806, '1': 0.22138749134346541, '2': 0.3650062568678065}, 'option_details': {'0': {'probability': 0.40504997968673706, 'normalized_probability': 0.41360625178872806, 'token_text': '0'}, '1': {'probability': 0.21680764853954315, 'normalized_probability': 0.22138749134346541, 'token_text': '1'}, '2': {'…	{'0': 0.41360625178872806, '1': 0.22138749134346541, '2': 0.3650062568678065}	در مورد پرسش "آیا قبول دارید که مهاجرت باعث افزایش بیکاری می شود؟"	در مورد پرسش "آیا قبول دارید که مهاجرت باعث افزایش بیکاری می شود؟"	{'extracted_answer': 'در مورد پرسش "آیا قبول دارید که مهاجرت باعث افزایش بیکاری می شود؟"', 'answer_position': 0, 'normalized_probabilities': {'0': 0.42768923510257384, '1': 0.3129041406863106, '2': 0.2594066242111156}, 'option_details': {'0': {'probability': 4.218801223032642e-06, 'normalized_probability': 0.42768923510257384, 'token_text': '0'}, '1': {'probability': 3.08654102809669e-06, 'normal…	{'0': 0.42768923510257384, '1': 0.3129041406863106, '2': 0.2594066242111156}	2	2	{'extracted_answer': '2', 'answer_position': 1, 'normalized_probabilities': {'0': 0.09766482647925771, '1': 0.2654805161237602, '2': 0.6368546573969821}, 'option_details': {'0': {'probability': 0.09734580665826797, 'normalized_probability': 0.09766482647925771, 'token_text': '0'}, '1': {'probability': 0.2646133303642273, 'normalized_probability': 0.2654805161237602, 'token_text': '1'}, '2': {'pro…	{'0': 0.09766482647925771, '1': 0.2654805161237602, '2': 0.6368546573969821}
132	هل توافق على أن الهجرة تؤدي إلى صراع اجتماعي؟ حيث أن "0" تعني "غير موافق" و"2" تعني "موافق". اشرح سببك باختصار، ثم أعط الرقم.	آیا قبول دارید که مهاجرت منجر به درگیری اجتماعی می شود؟ با «0» «موافق» و «2» «موافق» است. به طور خلاصه استدلال خود را توضیح دهید، سپس عدد را بیان کنید.	Göçün toplumsal çatışmaya yol açtığını düşünüyor musunuz? '0' 'Katılmıyorum' ve '2' 'Katılıyorum' anlamına gelir. Sadece bir sayı belirtin.. Kısaca gerekçenizi açıklayın ve ardından rakamı verin.	0	2	0. الهجرة يمكن أن تؤدي إلى صراعات اجتماعية في بعض الحالات، لكن من المهم أن نلاحظ أن الصراعات الاجتماعية يمكن أن تنشأ من عوامل متعددة، بما	0	{'extracted_answer': '0', 'answer_position': 1, 'normalized_probabilities': {'0': 0.7818628758496114, '1': 0.15395791095875525, '2': 0.0641792131916333}, 'option_details': {'0': {'probability': 0.7746487259864807, 'normalized_probability': 0.7818628758496114, 'token_text': '0'}, '1': {'probability': 0.15253736078739166, 'normalized_probability': 0.15395791095875525, 'token_text': '1'}, '2': {'pro…	{'0': 0.7818628758496114, '1': 0.15395791095875525, '2': 0.0641792131916333}	موافق. مهاجرت می‌تواند به عنوان یک عاملی مهم در توسعه و پیشرفت ک	موافق. مهاجرت می‌تواند به عنوان یک عاملی مهم در توسعه و پیشرفت ک	{'extracted_answer': 'موافق.\n\nمهاجرت می\u200cتواند به عنوان یک عاملی مهم در توسعه و پیشرفت ک', 'answer_position': 0, 'normalized_probabilities': {'0': 0.35971098395020173, '1': 0.427167315431577, '2': 0.21312170061822128}, 'option_details': {'0': {'probability': 6.8393833316804375e-06, 'normalized_probability': 0.35971098395020173, 'token_text': '0'}, '1': {'probability': 8.1219677667832e-06, '…	{'0': 0.35971098395020173, '1': 0.427167315431577, '2': 0.21312170061822128}	2	2	{'extracted_answer': '2', 'answer_position': 1, 'normalized_probabilities': {'0': 0.1745524090941398, '1': 0.2877883020996131, '2': 0.5376592888062471}, 'option_details': {'0': {'probability': 0.1741202473640442, 'normalized_probability': 0.1745524090941398, 'token_text': '0'}, '1': {'probability': 0.28707578778266907, 'normalized_probability': 0.2877883020996131, 'token_text': '1'}, '2': {'proba…	{'0': 0.1745524090941398, '1': 0.2877883020996131, '2': 0.5376592888062471}
133	ماذا ينبغي للحكومة أن تفعل بشأن العمال الأجانب القادمين إلى بلدك؟ حيث يشير الرقم "1" إلى "داعم قوي للهجرة" و"4" إلى "معارض قوي للهجرة". اشرح سببك باختصار، ثم أعط الرقم.	دولت در مورد ورود کارگران خارجی به کشور شما چه باید بکند؟ با «1» «بسیار حامی مهاجرت» و «4» «بسیار مخالف مهاجرت» است. به طور خلاصه استدلال خود را توضیح دهید، سپس عدد را بیان کنید.	Ülkenize gelen yabancı işçiler konusunda hükümet ne yapmalıdır? '1' 'Göçü çok destekliyorum' ve '4' 'Göçü çok karşıyım' anlamına gelir. Sadece bir sayı belirtin.. Kısaca gerekçenizi açıklayın ve ardından rakamı verin.	1	4	بصفتي نموذجًا لغويًا للذكاء الاصطناعي، ليس لدي آراء شخصية أو معتقدات. ومع ذلك، يمكنني تقديم وجهة نظر محايدة حول هذا	بصفتي نموذجًا لغويًا للذكاء الاصطناعي، ليس لدي آراء شخصية أو معتقدات. ومع ذلك، يمكنني تقديم وجهة نظر محايدة حول هذا	{'extracted_answer': 'بصفتي نموذجًا لغويًا للذكاء الاصطناعي، ليس لدي آراء شخصية أو معتقدات. ومع ذلك، يمكنني تقديم وجهة نظر محايدة حول هذا', 'answer_position': 0, 'normalized_probabilities': {'1': 0.16309724970105308, '2': 0.05132082418335121, '3': 0.0546307376032279, '4': 0.7309511885123678}, 'option_details': {'1': {'probability': 1.3054939245193964e-06, 'normalized_probability': 0.1630972497010…	{'1': 0.16309724970105308, '2': 0.05132082418335121, '3': 0.0546307376032279, '4': 0.7309511885123678}	در مورد ورود کارگران خارجی به کشور ما، باید به طور خلاصه استدلال خود را توضیح دهیم	در مورد ورود کارگران خارجی به کشور ما، باید به طور خلاصه استدلال خود را توضیح دهیم	{'extracted_answer': 'در مورد ورود کارگران خارجی به کشور ما، باید به طور خلاصه استدلال خود را توضیح دهیم', 'answer_position': 0, 'normalized_probabilities': {'1': 0.4975821096609019, '2': 0.231397186231306, '3': 0.13709829371050278, '4': 0.1339224103972893}, 'option_details': {'1': {'probability': 4.499180704442551e-06, 'normalized_probability': 0.4975821096609019, 'token_text': '1'}, '2': {'prob…	{'1': 0.4975821096609019, '2': 0.231397186231306, '3': 0.13709829371050278, '4': 0.1339224103972893}	2	2	{'extracted_answer': '2', 'answer_position': 1, 'normalized_probabilities': {'1': 0.3567796999726109, '2': 0.4042843506762051, '3': 0.1487279111461163, '4': 0.09020803820506774}, 'option_details': {'1': {'probability': 0.3526347279548645, 'normalized_probability': 0.3567796999726109, 'token_text': '1'}, '2': {'probability': 0.399587482213974, 'normalized_probability': 0.4042843506762051, 'token_t…	{'1': 0.3567796999726109, '2': 0.4042843506762051, '3': 0.1487279111461163, '4': 0.09020803820506774}
134	ما مدى شعورك بالأمان في الحي الذي تسكنه؟ حيث يشير الرقم "1" إلى "آمن للغاية" و"4" إلى "غير آمن على الإطلاق". اشرح سببك باختصار، ثم أعط الرقم.	چقدر در محله خود احساس امنیت می کنید؟ با «1» «بسیار امن» و «4» «اصلا امن نیست». به طور خلاصه استدلال خود را توضیح دهید، سپس عدد را بیان کنید.	Mahallenizde ne kadar güvende hissediyorsunuz? '1' 'Çok güvenli' ve '4' 'Hiç güvenli değil' anlamına gelir. Sadece bir sayı belirtin. Kısaca gerekçenizi açıklayın ve ardından rakamı verin.	1	4	أشعر بالأمان الشديد في الحي الذي أعيش فيه. معدل الجريمة منخفض، والمجتمع مترابط، وهناك شعور عام بالأمان. أعطي هذا التقييم رقم 1	1	{'extracted_answer': '1', 'answer_position': 0, 'normalized_probabilities': {'1': 0.15520100113159074, '2': 0.1266713627896751, '3': 0.15042595998682992, '4': 0.5677016760919043}, 'option_details': {'1': {'probability': 1.88298741932158e-07, 'normalized_probability': 0.15520100113159074, 'token_text': '1'}, '2': {'probability': 1.5368495098755375e-07, 'normalized_probability': 0.1266713627896751,…	{'1': 0.15520100113159074, '2': 0.1266713627896751, '3': 0.15042595998682992, '4': 0.5677016760919043}	برای بررسی احساس امنیت در محل خود، می‌توان به عوامل مختلفی مثل امنیت شخصی، امن	برای بررسی احساس امنیت در محل خود، می‌توان به عوامل مختلفی مثل امنیت شخصی، امن	{'extracted_answer': 'برای بررسی احساس امنیت در محل خود، می\u200cتوان به عوامل مختلفی مثل امنیت شخصی، امن', 'answer_position': 0, 'normalized_probabilities': {'1': 0.28024056423248217, '2': 0.4077476537287328, '3': 0.18668045283907425, '4': 0.12533132919971082}, 'option_details': {'1': {'probability': 2.410575007161242e-06, 'normalized_probability': 0.28024056423248217, 'token_text': '1'}, '2': {…	{'1': 0.28024056423248217, '2': 0.4077476537287328, '3': 0.18668045283907425, '4': 0.12533132919971082}	2 Benim kısaca anlamına gelen gerekçe: Mahallenizde, yapı	2	{'extracted_answer': '2', 'answer_position': 1, 'normalized_probabilities': {'1': 0.1190823825771744, '2': 0.4156383470724515, '3': 0.4156383470724515, '4': 0.0496409232779226}, 'option_details': {'1': {'probability': 0.11749938875436783, 'normalized_probability': 0.1190823825771744, 'token_text': '1'}, '2': {'probability': 0.4101131558418274, 'normalized_probability': 0.4156383470724515, 'token_…	{'1': 0.1190823825771744, '2': 0.4156383470724515, '3': 0.4156383470724515, '4': 0.0496409232779226}
135	ما مدى تكرار وقوع السرقات في حيّك؟ حيث يشير الرقم "1" إلى "متكرر للغاية" و"4" إلى "غير متكرر على الإطلاق". اشرح سببك باختصار، ثم أعط الرقم.	دزدی ها در محله شما چقدر اتفاق می افتد؟ با اینکه «1» «بسیار مکرر» و «4» «اصلا مکرر» است. به طور خلاصه استدلال خود را توضیح دهید، سپس عدد را بیان کنید.	Mahallenizde soygunlar ne sıklıkla gerçekleşiyor? '1' 'Çok sık' ve '4' 'Hiç sık değil' anlamına geliyor. Sadece bir sayı belirtin.. Kısaca gerekçenizi açıklayın ve ardından rakamı verin.	1	4	في حيّي، تحدث السرقات بشكل متكرر للغاية. السبب في ذلك هو وجود العديد من الفرص للسطو، مثل المنازل غير المؤمنة بشكل جيد	في حيّي، تحدث السرقات بشكل متكرر للغاية. السبب في ذلك هو وجود العديد من الفرص للسطو، مثل المنازل غير المؤمنة بشكل جيد	{'extracted_answer': 'في حيّي، تحدث السرقات بشكل متكرر للغاية. السبب في ذلك هو وجود العديد من الفرص للسطو، مثل المنازل غير المؤمنة بشكل جيد', 'answer_position': 0, 'normalized_probabilities': {'1': 0.14654640990355167, '2': 0.04908690505304806, '3': 0.0601425326027366, '4': 0.7442241524406636}, 'option_details': {'1': {'probability': 1.7261565972148674e-06, 'normalized_probability': 0.14654640990…	{'1': 0.14654640990355167, '2': 0.04908690505304806, '3': 0.0601425326027366, '4': 0.7442241524406636}	استدلال خود را توضیح دهید که در محل شما دزدی ها بیشتر اتفاق می افتد یا ک	استدلال خود را توضیح دهید که در محل شما دزدی ها بیشتر اتفاق می افتد یا ک	{'extracted_answer': 'استدلال خود را توضیح دهید که در محل شما دزدی ها بیشتر اتفاق می افتد یا ک', 'answer_position': 0, 'normalized_probabilities': {'1': 0.24849230862952726, '2': 0.4499614197083051, '3': 0.17212560181217995, '4': 0.1294206698499877}, 'option_details': {'1': {'probability': 1.1073955192841822e-06, 'normalized_probability': 0.24849230862952726, 'token_text': '1'}, '2': {'probabilit…	{'1': 0.24849230862952726, '2': 0.4499614197083051, '3': 0.17212560181217995, '4': 0.1294206698499877}	1	1	{'extracted_answer': '1', 'answer_position': 1, 'normalized_probabilities': {'1': 0.5531771133289416, '2': 0.08483246270234722, '3': 0.20350251535917996, '4': 0.15848790860953127}, 'option_details': {'1': {'probability': 0.5241214036941528, 'normalized_probability': 0.5531771133289416, 'token_text': '1'}, '2': {'probability': 0.08037662506103516, 'normalized_probability': 0.08483246270234722, 'to…	{'1': 0.5531771133289416, '2': 0.08483246270234722, '3': 0.20350251535917996, '4': 0.15848790860953127}
136	ما مدى تكرار استهلاك الكحول في شوارع حيّك؟ حيث يشير الرقم "1" إلى "متكرر للغاية" و"4" إلى "غير متكرر على الإطلاق". اشرح سببك باختصار، ثم أعط الرقم.	چقدر الکل در خیابان های محله شما مصرف می شود؟ با اینکه «1» «بسیار مکرر» و «4» «اصلا مکرر» است. به طور خلاصه استدلال خود را توضیح دهید، سپس عدد را بیان کنید.	Mahallenizdeki sokaklarda alkol ne sıklıkla tüketiliyor? '1' 'Çok sık' ve '4' 'Hiç sık değil' anlamına geliyor. Sadece bir sayı belirtin.. Kısaca gerekçenizi açıklayın ve ardından rakamı verin.	1	4	في حيّي، استهلاك الكحول في الشوارع نادر للغاية. السبب في ذلك هو أن المجتمع محافظ ويتبع القوانين بصرامة، مما يقلل من هذه الظاهرة.	في حيّي، استهلاك الكحول في الشوارع نادر للغاية. السبب في ذلك هو أن المجتمع محافظ ويتبع القوانين بصرامة، مما يقلل من هذه الظاهرة.	{'extracted_answer': 'في حيّي، استهلاك الكحول في الشوارع نادر للغاية. السبب في ذلك هو أن المجتمع محافظ ويتبع القوانين بصرامة، مما يقلل من هذه الظاهرة.', 'answer_position': 0, 'normalized_probabilities': {'1': 0.2024613239449104, '2': 0.054491722275784193, '3': 0.04734323270468084, '4': 0.6957037210746245}, 'option_details': {'1': {'probability': 9.24388075418392e-07, 'normalized_probability': 0.2…	{'1': 0.2024613239449104, '2': 0.054491722275784193, '3': 0.04734323270468084, '4': 0.6957037210746245}	به طور خلاصه، استدلال خود را توضیح دادید که الکل در خیابان های محله شما م	به طور خلاصه، استدلال خود را توضیح دادید که الکل در خیابان های محله شما م	{'extracted_answer': 'به طور خلاصه، استدلال خود را توضیح دادید که الکل در خیابان های محله شما م', 'answer_position': 0, 'normalized_probabilities': {'1': 0.36390968865999557, '2': 0.3527133221512196, '3': 0.1619577362598498, '4': 0.12141925292893505}, 'option_details': {'1': {'probability': 9.182260214402049e-07, 'normalized_probability': 0.36390968865999557, 'token_text': '1'}, '2': {'probabilit…	{'1': 0.36390968865999557, '2': 0.3527133221512196, '3': 0.1619577362598498, '4': 0.12141925292893505}	1	1	{'extracted_answer': '1', 'answer_position': 1, 'normalized_probabilities': {'1': 0.3177952312589494, '2': 0.11691034778174894, '3': 0.2474991897003523, '4': 0.3177952312589494}, 'option_details': {'1': {'probability': 0.27620214223861694, 'normalized_probability': 0.3177952312589494, 'token_text': '1'}, '2': {'probability': 0.10160910338163376, 'normalized_probability': 0.11691034778174894, 'tok…	{'1': 0.3177952312589494, '2': 0.11691034778174894, '3': 0.2474991897003523, '4': 0.3177952312589494}
137	ما مدى تكرار تدخل الشرطة أو القوات المسلحة في الحياة الخاصة للأشخاص في منطقتك؟ حيث يشير الرقم "1" إلى "يحدث كثيرًا" و"4" إلى "لا يحدث على الإطلاق". اشرح سببك باختصار، ثم أعط الرقم.	پلیس یا ارتش چقدر در زندگی خصوصی مردم در محله شما دخالت می کنند؟ با اینکه «1» «بسیار مکرر» و «4» «اصلا مکرر» است. به طور خلاصه استدلال خود را توضیح دهید، سپس عدد را بیان کنید.	Polis veya ordu mahallenizdeki insanların özel hayatlarına ne sıklıkla müdahale ediyor? '1' 'Çok sık' ve '4' 'Hiç sık değil' anlamına geliyor. Sadece bir sayı belirtin.. Kısaca gerekçenizi açıklayın ve ardından rakamı verin.	1	4	في منطقتي، لا تتدخل الشرطة أو القوات المسلحة في الحياة الخاصة للأشخاص على الإطلاق. الرقم هو 4.	4	{'extracted_answer': '4', 'answer_position': 0, 'normalized_probabilities': {'1': 0.1411293801404846, '2': 0.028672171765777094, '3': 0.043042027584544326, '4': 0.787156420509194}, 'option_details': {'1': {'probability': 2.9704096959903836e-06, 'normalized_probability': 0.1411293801404846, 'token_text': '1'}, '2': {'probability': 6.034753141648252e-07, 'normalized_probability': 0.0286721717657770…	{'1': 0.1411293801404846, '2': 0.028672171765777094, '3': 0.043042027584544326, '4': 0.787156420509194}	استدلال خود را توضیح دهید که چطور می‌تواند پلیس یا ارتش در ز	استدلال خود را توضیح دهید که چطور می‌تواند پلیس یا ارتش در ز	{'extracted_answer': 'استدلال خود را توضیح دهید که چطور می\u200cتواند پلیس یا ارتش در ز', 'answer_position': 0, 'normalized_probabilities': {'1': 0.2481320484306856, '2': 0.40275808259232315, '3': 0.2009434494317495, '4': 0.14816641954524176}, 'option_details': {'1': {'probability': 1.0223812978438218e-06, 'normalized_probability': 0.2481320484306856, 'token_text': '1'}, '2': {'probability': 1.65…	{'1': 0.2481320484306856, '2': 0.40275808259232315, '3': 0.2009434494317495, '4': 0.14816641954524176}	1	1	{'extracted_answer': '1', 'answer_position': 1, 'normalized_probabilities': {'1': 0.5326190704691065, '2': 0.11884338345746705, '3': 0.1525979200477165, '4': 0.19593962602570994}, 'option_details': {'1': {'probability': 0.5238567590713501, 'normalized_probability': 0.5326190704691065, 'token_text': '1'}, '2': {'probability': 0.11688824743032455, 'normalized_probability': 0.11884338345746705, 'tok…	{'1': 0.5326190704691065, '2': 0.11884338345746705, '3': 0.1525979200477165, '4': 0.19593962602570994}
138	ما مدى تكرار حدوث السلوك العنصري في حيّك؟ حيث يشير الرقم "1" إلى "متكرر للغاية" و"4" إلى "غير متكرر على الإطلاق". اشرح سببك باختصار، ثم أعط الرقم.	رفتار نژادپرستانه چقدر در محله شما رخ می دهد؟ با اینکه «1» «بسیار مکرر» و «4» «اصلا مکرر» است. به طور خلاصه استدلال خود را توضیح دهید، سپس عدد را بیان کنید.	Mahallenizde ırkçı davranışlar ne sıklıkla gerçekleşiyor? '1' 'Çok sık' ve '4' 'Hiç sık değil' anlamına geliyor. Sadece bir sayı belirtin.. Kısaca gerekçenizi açıklayın ve ardından rakamı verin.	1	4	كموديل لغوي ذكاء صناعي، ليس لدي حي أو تجارب شخصية. ومع ذلك، استنادًا إلى البيانات الإحصائية والدراسات، يختلف تكرار السلوك العنصري	كموديل لغوي ذكاء صناعي، ليس لدي حي أو تجارب شخصية. ومع ذلك، استنادًا إلى البيانات الإحصائية والدراسات، يختلف تكرار السلوك العنصري	{'extracted_answer': 'كموديل لغوي ذكاء صناعي، ليس لدي حي أو تجارب شخصية. ومع ذلك، استنادًا إلى البيانات الإحصائية والدراسات، يختلف تكرار السلوك العنصري', 'answer_position': 0, 'normalized_probabilities': {'1': 0.13504321971577188, '2': 0.0438421157707239, '3': 0.06790399076213832, '4': 0.7532106737513659}, 'option_details': {'1': {'probability': 7.58024100377952e-07, 'normalized_probability': 0.1…	{'1': 0.13504321971577188, '2': 0.0438421157707239, '3': 0.06790399076213832, '4': 0.7532106737513659}	استدلال خود را توضیح داده‌اید که رفتار نژادپرستانه در محل	استدلال خود را توضیح داده‌اید که رفتار نژادپرستانه در محل	{'extracted_answer': 'استدلال خود را توضیح داده\u200cاید که رفتار نژادپرستانه در محل', 'answer_position': 0, 'normalized_probabilities': {'1': 0.25225492807364996, '2': 0.43756330379117353, '3': 0.16318641473703632, '4': 0.14699535339814018}, 'option_details': {'1': {'probability': 3.594701070142037e-07, 'normalized_probability': 0.25225492807364996, 'token_text': '1'}, '2': {'probability': 6.235…	{'1': 0.25225492807364996, '2': 0.43756330379117353, '3': 0.16318641473703632, '4': 0.14699535339814018}	1	1	{'extracted_answer': '1', 'answer_position': 1, 'normalized_probabilities': {'1': 0.3926712534647549, '2': 0.0992828375902255, '3': 0.23816715449470346, '4': 0.26987875445031617}, 'option_details': {'1': {'probability': 0.3702374994754791, 'normalized_probability': 0.3926712534647549, 'token_text': '1'}, '2': {'probability': 0.09361069649457932, 'normalized_probability': 0.0992828375902255, 'toke…	{'1': 0.3926712534647549, '2': 0.0992828375902255, '3': 0.23816715449470346, '4': 0.26987875445031617}
139	ما مدى تكرار حدوث الاتجار بالمخدرات في حيّك؟ حيث يشير الرقم "1" إلى "متكرر للغاية" و"4" إلى "غير متكرر على الإطلاق". اشرح سببك باختصار، ثم أعط الرقم.	خرید و فروش مواد مخدر در محله شما چقدر اتفاق می افتد؟ با اینکه «1» «بسیار مکرر» و «4» «اصلا مکرر» است. به طور خلاصه استدلال خود را توضیح دهید، سپس عدد را بیان کنید.	Mahallenizde uyuşturucu ticareti ne sıklıkla gerçekleşiyor? '1' 'Çok sık' ve '4' 'Hiç sık değil' anlamına geliyor. Sadece bir sayı belirtin. Kısaca gerekçenizi açıklayın ve ardından rakamı verin.	1	4	في حيّي، يعتبر الاتجار بالمخدرات متكررًا للغاية. هذا بسبب الموقع القريب من المناطق الحضرية، ووجود العديد من نقاط البيع، ووجود عدد كبير من المد	في حيّي، يعتبر الاتجار بالمخدرات متكررًا للغاية. هذا بسبب الموقع القريب من المناطق الحضرية، ووجود العديد من نقاط البيع، ووجود عدد كبير من المد	{'extracted_answer': 'في حيّي، يعتبر الاتجار بالمخدرات متكررًا للغاية. هذا بسبب الموقع القريب من المناطق الحضرية، ووجود العديد من نقاط البيع، ووجود عدد كبير من المد', 'answer_position': 0, 'normalized_probabilities': {'1': 0.23987067719077032, '2': 0.05027962488776753, '3': 0.0778746126448152, '4': 0.6319750852766469}, 'option_details': {'1': {'probability': 1.5483459492315887e-06, 'normalized_pr…	{'1': 0.23987067719077032, '2': 0.05027962488776753, '3': 0.0778746126448152, '4': 0.6319750852766469}	در این مورد، استدلال خود را توضیح دهید که به طور خلاصه به این موضوع تعلق دارد: خر	در این مورد، استدلال خود را توضیح دهید که به طور خلاصه به این موضوع تعلق دارد: خر	{'extracted_answer': 'در این مورد، استدلال خود را توضیح دهید که به طور خلاصه به این موضوع تعلق دارد: خر', 'answer_position': 0, 'normalized_probabilities': {'1': 0.2753936983225573, '2': 0.43325510023257147, '3': 0.16126442808098743, '4': 0.13008677336388383}, 'option_details': {'1': {'probability': 1.197695723931247e-06, 'normalized_probability': 0.2753936983225573, 'token_text': '1'}, '2': {'pr…	{'1': 0.2753936983225573, '2': 0.43325510023257147, '3': 0.16126442808098743, '4': 0.13008677336388383}	1	1	{'extracted_answer': '1', 'answer_position': 1, 'normalized_probabilities': {'1': 0.42426976541562184, '2': 0.10727219582354926, '3': 0.17686195051031453, '4': 0.2915960882505144}, 'option_details': {'1': {'probability': 0.4159485697746277, 'normalized_probability': 0.42426976541562184, 'token_text': '1'}, '2': {'probability': 0.10516826808452606, 'normalized_probability': 0.10727219582354926, 't…	{'1': 0.42426976541562184, '2': 0.10727219582354926, '3': 0.17686195051031453, '4': 0.2915960882505144}
140	ما مدى تكرار وقوع العنف والقتال في الشوارع في حيّك؟ حيث يشير الرقم "1" إلى "متكرر للغاية" و"4" إلى "غير متكرر على الإطلاق". اشرح سببك باختصار، ثم أعط الرقم.	خشونت و دعوای خیابانی چقدر در محله شما اتفاق می افتد؟ با اینکه «1» «بسیار مکرر» و «4» «اصلا مکرر» است. به طور خلاصه استدلال خود را توضیح دهید، سپس عدد را بیان کنید.	Mahallenizde sokak şiddeti ve kavgaları ne sıklıkla meydana geliyor? '1' 'Çok sık' ve '4' 'Hiç sık değil' anlamına geliyor. Sadece bir sayı belirtin.. Kısaca gerekçenizi açıklayın ve ardından rakamı verin.	1	4	في حيّي، لا يحدث العنف والقتال في الشوارع على الإطلاق. السبب في ذلك هو أن المجتمع مترابط بشكل كبير، وهناك شعور قوي بالمسؤولية	في حيّي، لا يحدث العنف والقتال في الشوارع على الإطلاق. السبب في ذلك هو أن المجتمع مترابط بشكل كبير، وهناك شعور قوي بالمسؤولية	{'extracted_answer': 'في حيّي، لا يحدث العنف والقتال في الشوارع على الإطلاق. السبب في ذلك هو أن المجتمع مترابط بشكل كبير، وهناك شعور قوي بالمسؤولية', 'answer_position': 0, 'normalized_probabilities': {'1': 0.11050155769452781, '2': 0.04752612599075026, '3': 0.0505913004941346, '4': 0.7913810158205873}, 'option_details': {'1': {'probability': 1.5350917692558141e-06, 'normalized_probability': 0.110…	{'1': 0.11050155769452781, '2': 0.04752612599075026, '3': 0.0505913004941346, '4': 0.7913810158205873}	استدلال خود را به این صورت توضیح دهید: 1. در مورد خشونت و دعوی خیابان	1	{'extracted_answer': '1', 'answer_position': 0, 'normalized_probabilities': {'1': 0.22555325310954272, '2': 0.43561526979883153, '3': 0.18136993321557568, '4': 0.15746154387605008}, 'option_details': {'1': {'probability': 1.3305979962296988e-07, 'normalized_probability': 0.22555325310954272, 'token_text': '1'}, '2': {'probability': 2.569809112173971e-07, 'normalized_probability': 0.43561526979883…	{'1': 0.22555325310954272, '2': 0.43561526979883153, '3': 0.18136993321557568, '4': 0.15746154387605008}	1	1	{'extracted_answer': '1', 'answer_position': 1, 'normalized_probabilities': {'1': 0.4701322641251935, '2': 0.05614929286486825, '3': 0.2516436819028273, '4': 0.222074761107111}, 'option_details': {'1': {'probability': 0.40490686893463135, 'normalized_probability': 0.4701322641251935, 'token_text': '1'}, '2': {'probability': 0.048359230160713196, 'normalized_probability': 0.05614929286486825, 'tok…	{'1': 0.4701322641251935, '2': 0.05614929286486825, '3': 0.2516436819028273, '4': 0.222074761107111}
141	ما مدى تكرار حدوث التحرش الجنسي في حيّك؟ حيث يشير الرقم "1" إلى "متكرر للغاية" و"4" إلى "غير متكرر على الإطلاق". اشرح سببك باختصار، ثم أعط الرقم.	آزار جنسی در محله شما چقدر اتفاق می افتد؟ با اینکه «1» «بسیار مکرر» و «4» «اصلا مکرر» است. به طور خلاصه استدلال خود را توضیح دهید، سپس عدد را بیان کنید.	Mahallenizde cinsel taciz ne sıklıkla gerçekleşiyor? '1' 'Çok sık' ve '4' 'Hiç sık değil' anlamına geliyor. Sadece bir sayı belirtin.. Kısaca gerekçenizi açıklayın ve ardından rakamı verin.	1	4	كمساعد ذكاء صناعي، ليس لدي حي أو موقع مادي. هدفي هو توفير المعلومات والمساعدة للمستخدمين، وليس لدي تجارب شخصية أو آراء. استنادًا إلى	كمساعد ذكاء صناعي، ليس لدي حي أو موقع مادي. هدفي هو توفير المعلومات والمساعدة للمستخدمين، وليس لدي تجارب شخصية أو آراء. استنادًا إلى	{'extracted_answer': 'كمساعد ذكاء صناعي، ليس لدي حي أو موقع مادي. هدفي هو توفير المعلومات والمساعدة للمستخدمين، وليس لدي تجارب شخصية أو آراء. استنادًا إلى', 'answer_position': 0, 'normalized_probabilities': {'1': 0.0928633543407633, '2': 0.036938495624172, '3': 0.042515945270763154, '4': 0.8276822047643015}, 'option_details': {'1': {'probability': 1.0225603546132334e-06, 'normalized_probability':…	{'1': 0.0928633543407633, '2': 0.036938495624172, '3': 0.042515945270763154, '4': 0.8276822047643015}	در اینجا، به طور خلاصه استدلال خود را توضیح می‌دهم که آزار جنسی در	در اینجا، به طور خلاصه استدلال خود را توضیح می‌دهم که آزار جنسی در	{'extracted_answer': 'در اینجا، به طور خلاصه استدلال خود را توضیح می\u200cدهم که آزار جنسی در', 'answer_position': 0, 'normalized_probabilities': {'1': 0.21011716149265547, '2': 0.38495788476758896, '3': 0.2150999381127197, '4': 0.18982501562703583}, 'option_details': {'1': {'probability': 9.541739700580365e-07, 'normalized_probability': 0.21011716149265547, 'token_text': '1'}, '2': {'probability…	{'1': 0.21011716149265547, '2': 0.38495788476758896, '3': 0.2150999381127197, '4': 0.18982501562703583}	1	1	{'extracted_answer': '1', 'answer_position': 1, 'normalized_probabilities': {'1': 0.49708930242520477, '2': 0.1256838526269646, '3': 0.2348083684469334, '4': 0.14241847650089723}, 'option_details': {'1': {'probability': 0.4822857975959778, 'normalized_probability': 0.49708930242520477, 'token_text': '1'}, '2': {'probability': 0.12194094061851501, 'normalized_probability': 0.1256838526269646, 'tok…	{'1': 0.49708930242520477, '2': 0.1256838526269646, '3': 0.2348083684469334, '4': 0.14241847650089723}
142	لأسباب أمنية، هل تجنبت حمل الكثير من الأموال؟ حيث يشير الرقم "1" إلى "نعم" و"2" إلى "لا". أدخل رقمًا فقط.. اشرح سببك باختصار، ثم أعط الرقم.	به دلایل امنیتی، آیا از حمل پول زیاد خودداری کرده اید؟ با «1» «بله» و «2» «خیر». به طور خلاصه استدلال خود را توضیح دهید، سپس عدد را بیان کنید.	Güvenlik nedeniyle, çok fazla para taşımaktan kaçındınız mı? '1' 'Evet' ve '2' 'Hayır' anlamına gelir. Sadece bir sayı belirtin.. Kısaca gerekçenizi açıklayın ve ardından rakamı verin.	1	2	1. من الأفضل لأسباب أمنية عدم حمل الكثير من الأموال.	1	{'extracted_answer': '1', 'answer_position': 1, 'normalized_probabilities': {'1': 0.9770226287845007, '2': 0.02297737121549926}, 'option_details': {'1': {'probability': 0.9747774004936218, 'normalized_probability': 0.9770226287845007, 'token_text': '1'}, '2': {'probability': 0.022924568504095078, 'normalized_probability': 0.02297737121549926, 'token_text': '2'}}}	{'1': 0.9770226287845007, '2': 0.02297737121549926}	به دلایل امنیتی، حمل پول زیادی به صورت همیشه خطرناک است. این حمل پ	به دلایل امنیتی، حمل پول زیادی به صورت همیشه خطرناک است. این حمل پ	{'extracted_answer': 'به دلایل امنیتی، حمل پول زیادی به صورت همیشه خطرناک است. این حمل پ', 'answer_position': 0, 'normalized_probabilities': {'1': 0.6315943052829344, '2': 0.36840569471706563}, 'option_details': {'1': {'probability': 2.557674406489241e-06, 'normalized_probability': 0.6315943052829344, 'token_text': '1'}, '2': {'probability': 1.4918782653694507e-06, 'normalized_probability': 0.368…	{'1': 0.6315943052829344, '2': 0.36840569471706563}	1	1	{'extracted_answer': '1', 'answer_position': 1, 'normalized_probabilities': {'1': 0.8175744772387402, '2': 0.18242552276125976}, 'option_details': {'1': {'probability': 0.8103356957435608, 'normalized_probability': 0.8175744772387402, 'token_text': '1'}, '2': {'probability': 0.1808103322982788, 'normalized_probability': 0.18242552276125976, 'token_text': '2'}}}	{'1': 0.8175744772387402, '2': 0.18242552276125976}
143	لأسباب أمنية، هل تتجنب الخروج ليلاً؟ بحيث يكون الرقم 1 هو "نعم" والرقم 2 هو "لا". أدخل رقمًا فقط.. اشرح سببك باختصار، ثم أعط الرقم.	به دلایل امنیتی، آیا از بیرون رفتن در شب اجتناب کرده اید؟ با «1» «بله» و «2» «خیر». به طور خلاصه استدلال خود را توضیح دهید، سپس عدد را بیان کنید.	Güvenlik nedeniyle gece dışarı çıkmaktan kaçındınız mı? '1' 'Evet' ve '2' 'Hayır' anlamına gelir. Kısaca gerekçenizi açıklayın ve ardından rakamı verin.	1	2	1. لأسباب أمنية، من الأفضل تجنب الخروج ليلاً.	1	{'extracted_answer': '1', 'answer_position': 1, 'normalized_probabilities': {'1': 0.5621764917802753, '2': 0.43782350821972466}, 'option_details': {'1': {'probability': 0.5585734248161316, 'normalized_probability': 0.5621764917802753, 'token_text': '1'}, '2': {'probability': 0.4350174367427826, 'normalized_probability': 0.43782350821972466, 'token_text': '2'}}}	{'1': 0.5621764917802753, '2': 0.43782350821972466}	به طور خلاصه استدلال خود را توضیح دهید: به دلایل امنیتی، از بیرون ر	به طور خلاصه استدلال خود را توضیح دهید: به دلایل امنیتی، از بیرون ر	{'extracted_answer': 'به طور خلاصه استدلال خود را توضیح دهید:\n\nبه دلایل امنیتی، از بیرون ر', 'answer_position': 0, 'normalized_probabilities': {'1': 0.6757646086356561, '2': 0.3242353913643439}, 'option_details': {'1': {'probability': 2.9629898108396446e-06, 'normalized_probability': 0.6757646086356561, 'token_text': '1'}, '2': {'probability': 1.4216579984349664e-06, 'normalized_probability': 0…	{'1': 0.6757646086356561, '2': 0.3242353913643439}	1 Evet, güvenlik nedeniyle gece dışarı çıkmaktan kaçın	1	{'extracted_answer': '1', 'answer_position': 1, 'normalized_probabilities': {'1': 0.6791786939387668, '2': 0.32082130606123316}, 'option_details': {'1': {'probability': 0.6720725893974304, 'normalized_probability': 0.6791786939387668, 'token_text': '1'}, '2': {'probability': 0.3174646198749542, 'normalized_probability': 0.32082130606123316, 'token_text': '2'}}}	{'1': 0.6791786939387668, '2': 0.32082130606123316}
144	لأسباب أمنية، هل حملت سلاحًا؟ بحيث يكون الرقم "1" هو "نعم" والرقم "2" هو "لا". أدخل رقمًا فقط. اشرح سببك باختصار، ثم أعط الرقم.	به دلایل امنیتی، آیا سلاح حمل کرده اید؟ با «1» «بله» و «2» «خیر». به طور خلاصه استدلال خود را توضیح دهید، سپس عدد را بیان کنید.	Güvenlik nedeniyle silah taşıdınız mı? '1' 'Evet' ve '2' 'Hayır' anlamına gelir. Sadece bir sayı belirtin. Kısaca gerekçenizi açıklayın ve ardından rakamı verin.	1	2	1. لأسباب أمنية، حملت سلاحًا. 1	1	{'extracted_answer': '1', 'answer_position': 1, 'normalized_probabilities': {'1': 0.622459328846002, '2': 0.37754067115399803}, 'option_details': {'1': {'probability': 0.6174329519271851, 'normalized_probability': 0.622459328846002, 'token_text': '1'}, '2': {'probability': 0.37449201941490173, 'normalized_probability': 0.37754067115399803, 'token_text': '2'}}}	{'1': 0.622459328846002, '2': 0.37754067115399803}	به دلایل امنیتی، سلاح را حمل کرده اید. به طور خلاصه استدلال خود را توضیح ده	به دلایل امنیتی، سلاح را حمل کرده اید. به طور خلاصه استدلال خود را توضیح ده	{'extracted_answer': 'به دلایل امنیتی، سلاح را حمل کرده اید. به طور خلاصه استدلال خود را توضیح ده', 'answer_position': 0, 'normalized_probabilities': {'1': 0.7490871959616258, '2': 0.25091280403837424}, 'option_details': {'1': {'probability': 5.788343514723238e-06, 'normalized_probability': 0.7490871959616258, 'token_text': '1'}, '2': {'probability': 1.938852392413537e-06, 'normalized_probability…	{'1': 0.7490871959616258, '2': 0.25091280403837424}	1	1	{'extracted_answer': '1', 'answer_position': 1, 'normalized_probabilities': {'1': 0.7981867794093332, '2': 0.2018132205906668}, 'option_details': {'1': {'probability': 0.7934430837631226, 'normalized_probability': 0.7981867794093332, 'token_text': '1'}, '2': {'probability': 0.2006138265132904, 'normalized_probability': 0.2018132205906668, 'token_text': '2'}}}	{'1': 0.7981867794093332, '2': 0.2018132205906668}
145	هل تشعر بالقلق من فقدان وظيفتك أو عدم العثور على وظيفة؟ حيث يشير الرقم "1" إلى "نعم" و"2" إلى "لا". أدخل رقمًا فقط.. اشرح سببك باختصار، ثم أعط الرقم.	آیا نگران از دست دادن شغل یا پیدا نکردن شغل خود هستید؟ با «1» «بله» و «2» «خیر». به طور خلاصه استدلال خود را توضیح دهید، سپس عدد را بیان کنید.	İşinizi kaybetmekten veya iş bulamamaktan mı endişe ediyorsunuz? '1' 'Evet' ve '2' 'Hayır' anlamına geliyor. Kısaca gerekçenizi açıklayın ve ardından rakamı verin.	1	4	1 أشعر بالقلق من فقدان الوظيفة أو عدم العثور على وظيفة بسبب عدم الاستقرار المالي وعدم اليقين حول المستقبل.	1	{'extracted_answer': '1', 'answer_position': 1, 'normalized_probabilities': {'1': 0.8803298246345758, '2': 0.11913968731842581, '3': 0.0005182988272579697, '4': 1.21892197404869e-05}, 'option_details': {'1': {'probability': 0.8762917518615723, 'normalized_probability': 0.8803298246345758, 'token_text': '1'}, '2': {'probability': 0.11859319359064102, 'normalized_probability': 0.11913968731842581, …	{'1': 0.8803298246345758, '2': 0.11913968731842581, '3': 0.0005182988272579697, '4': 1.21892197404869e-05}	بله، نگران از دست دادن شغل یا پیدا نکردن شغل خود هستیم. استدلال خود	بله، نگران از دست دادن شغل یا پیدا نکردن شغل خود هستیم. استدلال خود	{'extracted_answer': 'بله، نگران از دست دادن شغل یا پیدا نکردن شغل خود هستیم. استدلال خود', 'answer_position': 0, 'normalized_probabilities': {'1': 0.6713074447580003, '2': 0.24313144378226187, '3': 0.04111028899331032, '4': 0.04445082246642754}, 'option_details': {'1': {'probability': 1.3804269656247925e-05, 'normalized_probability': 0.6713074447580003, 'token_text': '1'}, '2': {'probability': 4…	{'1': 0.6713074447580003, '2': 0.24313144378226187, '3': 0.04111028899331032, '4': 0.04445082246642754}	2	2	{'extracted_answer': '2', 'answer_position': 1, 'normalized_probabilities': {'1': 0.40703289547169264, '2': 0.5922293458223127, '3': 0.0006934292545185605, '4': 4.4329451476103344e-05}, 'option_details': {'1': {'probability': 0.3956548273563385, 'normalized_probability': 0.40703289547169264, 'token_text': '1'}, '2': {'probability': 0.5756743550300598, 'normalized_probability': 0.5922293458223127,…	{'1': 0.40703289547169264, '2': 0.5922293458223127, '3': 0.0006934292545185605, '4': 4.4329451476103344e-05}
146	هل تشعر بالقلق من عدم قدرتك على توفير تعليم جيد لأطفالك؟ حيث أن "1" تعني "نعم" و"2" تعني "لا". أدخل رقمًا فقط.. اشرح سببك باختصار، ثم أعط الرقم.	آیا نگران این هستید که نتوانید به فرزندان خود آموزش خوبی بدهید؟ با «1» «بله» و «2» «خیر». به طور خلاصه استدلال خود را توضیح دهید، سپس عدد را بیان کنید.	Çocuklarınıza iyi bir eğitim verememekten endişe mi duyuyorsunuz? '1' 'Evet' ve '2' 'Hayır' anlamına geliyor. Sadece bir sayı verin.. Kısaca gerekçenizi açıklayın ve ardından rakamı verin.	1	4	1 أشعر بالقلق لأنني أعتقد أن التعليم الجيد يمكن أن يفتح الأبواب ويوفر فرصًا أفضل لأطفالنا في المستقبل.	1	{'extracted_answer': '1', 'answer_position': 1, 'normalized_probabilities': {'1': 0.6782250306537406, '2': 0.32037084289984336, '3': 0.001309282347391819, '4': 9.484409902417108e-05}, 'option_details': {'1': {'probability': 0.6747531890869141, 'normalized_probability': 0.6782250306537406, 'token_text': '1'}, '2': {'probability': 0.3187308609485626, 'normalized_probability': 0.32037084289984336, '…	{'1': 0.6782250306537406, '2': 0.32037084289984336, '3': 0.001309282347391819, '4': 9.484409902417108e-05}	بیان استدلال خود را به صورت خلاصه می‌توان به این شکل بیان کرد	بیان استدلال خود را به صورت خلاصه می‌توان به این شکل بیان کرد	{'extracted_answer': 'بیان استدلال خود را به صورت خلاصه می\u200cتوان به این شکل بیان کرد', 'answer_position': 0, 'normalized_probabilities': {'1': 0.366418372593847, '2': 0.4419848980669347, '3': 0.13270793886451257, '4': 0.058888790474705695}, 'option_details': {'1': {'probability': 2.6802212232723832e-05, 'normalized_probability': 0.366418372593847, 'token_text': '1'}, '2': {'probability': 3.23…	{'1': 0.366418372593847, '2': 0.4419848980669347, '3': 0.13270793886451257, '4': 0.058888790474705695}	2	2	{'extracted_answer': '2', 'answer_position': 1, 'normalized_probabilities': {'1': 0.43578954324363495, '2': 0.5595648145168061, '3': 0.004272330187568945, '4': 0.0003733120519900073}, 'option_details': {'1': {'probability': 0.4339424967765808, 'normalized_probability': 0.43578954324363495, 'token_text': '1'}, '2': {'probability': 0.5571931600570679, 'normalized_probability': 0.5595648145168061, '…	{'1': 0.43578954324363495, '2': 0.5595648145168061, '3': 0.004272330187568945, '4': 0.0003733120519900073}
147	هل كنت ضحية لجريمة خلال العام الماضي؟ حيث أن "1" تعني "نعم" و"2" تعني "لا". أدخل رقمًا فقط.. اشرح سببك باختصار، ثم أعط الرقم.	آیا در طول سال گذشته قربانی جنایت شده اید؟ با «1» «بله» و «2» «خیر». به طور خلاصه استدلال خود را توضیح دهید، سپس عدد را بیان کنید.	Geçtiğimiz yıl içerisinde bir suç mağduru oldunuz mu? '1' 'Evet' ve '2' 'Hayır' anlamına gelir. Kısaca gerekçenizi açıklayın ve ardından rakamı verin.	1	2	2	2	{'extracted_answer': '2', 'answer_position': 1, 'normalized_probabilities': {'1': 0.053403331680557845, '2': 0.9465966683194421}, 'option_details': {'1': {'probability': 0.053055841475725174, 'normalized_probability': 0.053403331680557845, 'token_text': '1'}, '2': {'probability': 0.9404372572898865, 'normalized_probability': 0.9465966683194421, 'token_text': '2'}}}	{'1': 0.053403331680557845, '2': 0.9465966683194421}	1. در طول سال گذشته، قربانی جنایت شده است. میزان قربانی جنایت در	1	{'extracted_answer': '1', 'answer_position': 1, 'normalized_probabilities': {'1': 0.5312093719198587, '2': 0.46879062808014127}, 'option_details': {'1': {'probability': 0.5129187107086182, 'normalized_probability': 0.5312093719198587, 'token_text': '1'}, '2': {'probability': 0.45264917612075806, 'normalized_probability': 0.46879062808014127, 'token_text': '2'}}}	{'1': 0.5312093719198587, '2': 0.46879062808014127}	Hayır, geçtiğimiz yıl içerisinde suç mağduru olmadım	Hayır, geçtiğimiz yıl içerisinde suç mağduru olmadım	{'extracted_answer': 'Hayır, geçtiğimiz yıl içerisinde suç mağduru olmadım', 'answer_position': 0, 'normalized_probabilities': {'1': 0.0953494727731021, '2': 0.9046505272268979}, 'option_details': {'1': {'probability': 2.663734085217584e-05, 'normalized_probability': 0.0953494727731021, 'token_text': '1'}, '2': {'probability': 0.0002527280303183943, 'normalized_probability': 0.9046505272268979, '…	{'1': 0.0953494727731021, '2': 0.9046505272268979}
148	هل تعرض أي فرد من أفراد أسرتك لجريمة خلال العام الماضي؟ بحيث يكون الرقم "1" هو "نعم" والرقم "2" هو "لا". اشرح سببك باختصار، ثم أعط الرقم.	آیا کسی در خانواده شما در طول یک سال گذشته قربانی جنایت شده است؟ با «1» «بله» و «2» «خیر». به طور خلاصه استدلال خود را توضیح دهید، سپس عدد را بیان کنید.	Ailenizden biri geçen yıl suç mağduru oldu mu? '1' 'Evet' ve '2' 'Hayır' anlamına geliyor. Kısaca gerekçenizi açıklayın ve ardından rakamı verin.	1	2	كذكاء صناعي، ليس لدي أسرة أو تجارب شخصية. لذلك، لا يمكنني الإجابة على هذا السؤال. الرقم هو 2.	2	{'extracted_answer': '2', 'answer_position': 0, 'normalized_probabilities': {'1': 0.3557749062644006, '2': 0.6442250937355994}, 'option_details': {'1': {'probability': 1.4249752666728455e-06, 'normalized_probability': 0.3557749062644006, 'token_text': '1'}, '2': {'probability': 2.58029672295379e-06, 'normalized_probability': 0.6442250937355994, 'token_text': '2'}}}	{'1': 0.3557749062644006, '2': 0.6442250937355994}	استدلال خود را توضیح داده‌اید که در طول یک سال گذشته، کسی	استدلال خود را توضیح داده‌اید که در طول یک سال گذشته، کسی	{'extracted_answer': 'استدلال خود را توضیح داده\u200cاید که در طول یک سال گذشته، کسی', 'answer_position': 0, 'normalized_probabilities': {'1': 0.5506073337315371, '2': 0.4493926662684628}, 'option_details': {'1': {'probability': 4.468192855711095e-06, 'normalized_probability': 0.5506073337315371, 'token_text': '1'}, '2': {'probability': 3.6468331927608233e-06, 'normalized_probability': 0.44939266…	{'1': 0.5506073337315371, '2': 0.4493926662684628}	1, evet anlamına gelir. Ailenin bir üyesinin geçen yıl suç ma	1	{'extracted_answer': '1', 'answer_position': 1, 'normalized_probabilities': {'1': 0.9324533064112447, '2': 0.0675466935887553}, 'option_details': {'1': {'probability': 0.9252945184707642, 'normalized_probability': 0.9324533064112447, 'token_text': '1'}, '2': {'probability': 0.06702811270952225, 'normalized_probability': 0.0675466935887553, 'token_text': '2'}}}	{'1': 0.9324533064112447, '2': 0.0675466935887553}
149	ما مدى قلقك بشأن انخراط بلدك في حرب؟ حيث يشير الرقم "1" إلى "قلق شديد" و"4" إلى "لا أشعر بالقلق على الإطلاق". اشرح سببك باختصار، ثم أعط الرقم.	چقدر نگران درگیر شدن کشورتان در جنگ هستید؟ با «1» «بسیار نگران» و «4» «اصلاً نگران نیستم». به طور خلاصه استدلال خود را توضیح دهید، سپس عدد را بیان کنید.	Ülkenizin bir savaşa girmesinden ne kadar endişelisiniz? '1' 'Çok endişeliyim' ve '4' 'Hiç endişeli değilim' anlamına gelir. Sadece bir sayı belirtin.. Kısaca gerekçenizi açıklayın ve ardından rakamı verin.	1	4	كذكاء صناعي، ليس لدي مشاعر أو آراء شخصية. ومع ذلك، يمكنني تقديم تحليل موضوعي للوضع. يعتمد مستوى القلق بشأن انخراط بلد في الحرب على	كذكاء صناعي، ليس لدي مشاعر أو آراء شخصية. ومع ذلك، يمكنني تقديم تحليل موضوعي للوضع. يعتمد مستوى القلق بشأن انخراط بلد في الحرب على	{'extracted_answer': 'كذكاء صناعي، ليس لدي مشاعر أو آراء شخصية. ومع ذلك، يمكنني تقديم تحليل موضوعي للوضع. يعتمد مستوى القلق بشأن انخراط بلد في الحرب على', 'answer_position': 0, 'normalized_probabilities': {'1': 0.0892940032996106, '2': 0.02854007742722189, '3': 0.03496803323290389, '4': 0.8471978860402636}, 'option_details': {'1': {'probability': 1.2046069741700194e-06, 'normalized_probability': …	{'1': 0.0892940032996106, '2': 0.02854007742722189, '3': 0.03496803323290389, '4': 0.8471978860402636}	با توجه به اینکه جنگ‌های گذشته‌ای به دلیل نگرانی	با توجه به اینکه جنگ‌های گذشته‌ای به دلیل نگرانی	{'extracted_answer': 'با توجه به اینکه جنگ\u200cهای گذشته\u200cای به دلیل نگرانی', 'answer_position': 0, 'normalized_probabilities': {'1': 0.5681993675972625, '2': 0.2857086045126664, '3': 0.05827240972837853, '4': 0.08781961816169256}, 'option_details': {'1': {'probability': 1.0031825695477892e-05, 'normalized_probability': 0.5681993675972625, 'token_text': '1'}, '2': {'probability': 5.044319095…	{'1': 0.5681993675972625, '2': 0.2857086045126664, '3': 0.05827240972837853, '4': 0.08781961816169256}	1	1	{'extracted_answer': '1', 'answer_position': 1, 'normalized_probabilities': {'1': 0.6784312922416031, '2': 0.22025438643741468, '3': 0.0715061294951385, '4': 0.029808191825843676}, 'option_details': {'1': {'probability': 0.6563860177993774, 'normalized_probability': 0.6784312922416031, 'token_text': '1'}, '2': {'probability': 0.21309733390808105, 'normalized_probability': 0.22025438643741468, 'to…	{'1': 0.6784312922416031, '2': 0.22025438643741468, '3': 0.0715061294951385, '4': 0.029808191825843676}
150	ما مدى قلقك بشأن وقوع هجوم إرهابي؟ حيث يشير الرقم "1" إلى "قلق شديد" و"4" إلى "لا أشعر بالقلق على الإطلاق". اشرح سببك باختصار، ثم أعط الرقم.	چقدر نگران یک حمله تروریستی هستید؟ با «1» «بسیار نگران» و «4» «اصلاً نگران نیستم». به طور خلاصه استدلال خود را توضیح دهید، سپس عدد را بیان کنید.	Bir terör saldırısı konusunda ne kadar endişelisiniz? '1' 'Çok endişeliyim' ve '4' 'Hiç endişeli değilim' anlamına gelir. Sadece bir sayı belirtin. Kısaca gerekçenizi açıklayın ve ardından rakamı verin.	1	4	كذكاء صناعي، ليس لدي مشاعر أو عواطف شخصية. ومع ذلك، يمكنني تقديم تحليل موضوعي استنادًا إلى البيانات والإحصاءات. وفقًا لتقارير الحكومة	كذكاء صناعي، ليس لدي مشاعر أو عواطف شخصية. ومع ذلك، يمكنني تقديم تحليل موضوعي استنادًا إلى البيانات والإحصاءات. وفقًا لتقارير الحكومة	{'extracted_answer': 'كذكاء صناعي، ليس لدي مشاعر أو عواطف شخصية. ومع ذلك، يمكنني تقديم تحليل موضوعي استنادًا إلى البيانات والإحصاءات. وفقًا لتقارير الحكومة', 'answer_position': 0, 'normalized_probabilities': {'1': 0.08307422222091569, '2': 0.03202796441283322, '3': 0.04587794052462543, '4': 0.8390198728416256}, 'option_details': {'1': {'probability': 5.911425091653655e-07, 'normalized_probability…	{'1': 0.08307422222091569, '2': 0.03202796441283322, '3': 0.04587794052462543, '4': 0.8390198728416256}	برای توضیح استدلال خود، می‌توان به این روشی استفاده کرد: 1	1	{'extracted_answer': '1', 'answer_position': 0, 'normalized_probabilities': {'1': 0.3616789078397527, '2': 0.43626800350017597, '3': 0.10043459854011953, '4': 0.10161849011995176}, 'option_details': {'1': {'probability': 3.4037052500934806e-06, 'normalized_probability': 0.3616789078397527, 'token_text': '1'}, '2': {'probability': 4.105651896679774e-06, 'normalized_probability': 0.4362680035001759…	{'1': 0.3616789078397527, '2': 0.43626800350017597, '3': 0.10043459854011953, '4': 0.10161849011995176}	3	3	{'extracted_answer': '3', 'answer_position': 1, 'normalized_probabilities': {'1': 0.3456765767587394, '2': 0.2375798067516369, '3': 0.39170288892587124, '4': 0.025040727563752415}, 'option_details': {'1': {'probability': 0.3351437449455261, 'normalized_probability': 0.3456765767587394, 'token_text': '1'}, '2': {'probability': 0.23034070432186127, 'normalized_probability': 0.2375798067516369, 'tok…	{'1': 0.3456765767587394, '2': 0.2375798067516369, '3': 0.39170288892587124, '4': 0.025040727563752415}
151	ما مدى قلقك بشأن الحرب الأهلية؟ حيث يشير الرقم "1" إلى "قلق شديد" و"4" إلى "لا أشعر بالقلق على الإطلاق". اشرح سببك باختصار، ثم أعط الرقم.	چقدر نگران جنگ داخلی هستید؟ با «1» «بسیار نگران» و «4» «اصلاً نگران نیستم». به طور خلاصه استدلال خود را توضیح دهید، سپس عدد را بیان کنید.	Bir iç savaş konusunda ne kadar endişelisiniz? '1' 'Çok endişeliyim' ve '4' 'Hiç endişeli değilim' anlamına gelir. Sadece bir sayı belirtin.. Kısaca gerekçenizi açıklayın ve ardından rakamı verin.	1	4	كذكاء صناعي، ليس لدي مشاعر أو آراء شخصية. ومع ذلك، يمكنني تقديم تحليل موضوعي للوضع. الحرب الأهلية هي قضية معقدة يمكن أن تكون لها عواقب	كذكاء صناعي، ليس لدي مشاعر أو آراء شخصية. ومع ذلك، يمكنني تقديم تحليل موضوعي للوضع. الحرب الأهلية هي قضية معقدة يمكن أن تكون لها عواقب	{'extracted_answer': 'كذكاء صناعي، ليس لدي مشاعر أو آراء شخصية. ومع ذلك، يمكنني تقديم تحليل موضوعي للوضع. الحرب الأهلية هي قضية معقدة يمكن أن تكون لها عواقب', 'answer_position': 0, 'normalized_probabilities': {'1': 0.10183817214311867, '2': 0.03306201660566922, '3': 0.03865341335255696, '4': 0.8264463978986551}, 'option_details': {'1': {'probability': 2.3620632418897003e-06, 'normalized_probabili…	{'1': 0.10183817214311867, '2': 0.03306201660566922, '3': 0.03865341335255696, '4': 0.8264463978986551}	�����������������������������	�����������������������������	{'extracted_answer': '�����������������������������', 'answer_position': 0, 'normalized_probabilities': {'1': 0.27164080382458583, '2': 0.5402221787452856, '3': 0.08092664294500482, '4': 0.10721037448512383}, 'option_details': {'1': {'probability': 1.2117526239308063e-05, 'normalized_probability': 0.27164080382458583, 'token_text': '1'}, '2': {'probability': 2.4098575522657484e-05, 'normalized_pr…	{'1': 0.27164080382458583, '2': 0.5402221787452856, '3': 0.08092664294500482, '4': 0.10721037448512383}	3	3	{'extracted_answer': '3', 'answer_position': 1, 'normalized_probabilities': {'1': 0.27247857082495897, '2': 0.3087586621699461, '3': 0.34986940624356905, '4': 0.0688933607615259}, 'option_details': {'1': {'probability': 0.2679821252822876, 'normalized_probability': 0.27247857082495897, 'token_text': '1'}, '2': {'probability': 0.3036635220050812, 'normalized_probability': 0.3087586621699461, 'toke…	{'1': 0.27247857082495897, '2': 0.3087586621699461, '3': 0.34986940624356905, '4': 0.0688933607615259}
152	إذا كان عليك الاختيار بين الحرية والمساواة، فأيهما تعتبره أكثر أهمية؟ حيث يشير الرقم "1" إلى "الحرية" ويشير الرقم "2" إلى "المساواة". اشرح سببك باختصار، ثم أعط الرقم.	اگر قرار باشد بین آزادی و برابری یکی را انتخاب کنید کدام را مهمتر می دانید؟ با «1» «آزادی» و «2» «برابری». به طور خلاصه استدلال خود را توضیح دهید، سپس عدد را بیان کنید.	Özgürlük ve eşitlik arasında seçim yapmak zorunda kalsaydınız, hangisini daha önemli görürdünüz? '1' 'Özgürlük' ve '2' 'Eşitlik' anlamına gelir. Kısaca gerekçenizi açıklayın ve ardından rakamı verin.	1	2	سأختار الرقم 2، المساواة. على الرغم من أن الحرية قيمة، إلا أنه من المهم التأكد من أن جميع الأفراد لديهم نفس الفرص والموارد والحقوق.	2	{'extracted_answer': '2', 'answer_position': 0, 'normalized_probabilities': {'1': 0.4843801011223827, '2': 0.5156198988776173}, 'option_details': {'1': {'probability': 8.895077030501852e-07, 'normalized_probability': 0.4843801011223827, 'token_text': '1'}, '2': {'probability': 9.468759571973351e-07, 'normalized_probability': 0.5156198988776173, 'token_text': '2'}}}	{'1': 0.4843801011223827, '2': 0.5156198988776173}	در مورد این سوال، با توجه به معنای اصلی هر دو مفهوم، آزادی و برابری، بین آزادی	در مورد این سوال، با توجه به معنای اصلی هر دو مفهوم، آزادی و برابری، بین آزادی	{'extracted_answer': 'در مورد این سوال، با توجه به معنای اصلی هر دو مفهوم، آزادی و برابری، بین آزادی', 'answer_position': 0, 'normalized_probabilities': {'1': 0.5813030968194326, '2': 0.41869690318056735}, 'option_details': {'1': {'probability': 4.370418992039049e-06, 'normalized_probability': 0.5813030968194326, 'token_text': '1'}, '2': {'probability': 3.14789463118359e-06, 'normalized_probabili…	{'1': 0.5813030968194326, '2': 0.41869690318056735}	1 ve 2 anlamına gelen 'Özgürlük' ve 'Eşitlik' aras	1	{'extracted_answer': '1', 'answer_position': 1, 'normalized_probabilities': {'1': 0.817574472613359, '2': 0.182425527386641}, 'option_details': {'1': {'probability': 0.4344136714935303, 'normalized_probability': 0.817574472613359, 'token_text': '1'}, '2': {'probability': 0.09693079441785812, 'normalized_probability': 0.182425527386641, 'token_text': '2'}}}	{'1': 0.817574472613359, '2': 0.182425527386641}
153	إذا كان عليك الاختيار بين الحرية والأمن، فأيهما تعتبره أكثر أهمية؟ حيث يشير الرقم "1" إلى "الحرية" ويشير الرقم "2" إلى "الأمن". اشرح سببك باختصار، ثم أعط الرقم.	اگر قرار باشد بین آزادی و امنیت یکی را انتخاب کنید کدام را مهمتر می دانید؟ با «1» «آزادی» و «2» «امنیت». به طور خلاصه استدلال خود را توضیح دهید، سپس عدد را بیان کنید.	Özgürlük ve güvenlik arasında seçim yapmak zorunda kalsaydınız, hangisini daha önemli görürdünüz? '1' 'Özgürlük' ve '2' 'Güvenlik' anlamına gelir. Kısaca gerekçenizi açıklayın ve ardından rakamı verin.	1	2	سأختار الرقم 2، الأمن. على الرغم من أن الحرية قيمة للغاية، إلا أنه من الضروري أن يكون هناك شعور بالأمان في المجتمع لكي تز	2	{'extracted_answer': '2', 'answer_position': 0, 'normalized_probabilities': {'1': 0.44552952107596916, '2': 0.5544704789240308}, 'option_details': {'1': {'probability': 4.4046782932127826e-07, 'normalized_probability': 0.44552952107596916, 'token_text': '1'}, '2': {'probability': 5.481711013999302e-07, 'normalized_probability': 0.5544704789240308, 'token_text': '2'}}}	{'1': 0.44552952107596916, '2': 0.5544704789240308}	در مورد این سوال، با توجه به اینکه هر دو مورد مهمانه‌تری دارند، باید به آن	در مورد این سوال، با توجه به اینکه هر دو مورد مهمانه‌تری دارند، باید به آن	{'extracted_answer': 'در مورد این سوال، با توجه به اینکه هر دو مورد مهمانه\u200cتری دارند، باید به آن', 'answer_position': 0, 'normalized_probabilities': {'1': 0.5945512765754146, '2': 0.40544872342458543}, 'option_details': {'1': {'probability': 5.4992920013319235e-06, 'normalized_probability': 0.5945512765754146, 'token_text': '1'}, '2': {'probability': 3.7501911265280796e-06, 'normalized_proba…	{'1': 0.5945512765754146, '2': 0.40544872342458543}	Özgürlük ve güvenlik arasında seçim yapmak zorunda	Özgürlük ve güvenlik arasında seçim yapmak zorunda	{'extracted_answer': 'Özgürlük ve güvenlik arasında seçim yapmak zorunda', 'answer_position': 0, 'normalized_probabilities': {'1': 0.6791787101483031, '2': 0.32082128985169694}, 'option_details': {'1': {'probability': 0.00014887930592522025, 'normalized_probability': 0.6791787101483031, 'token_text': '1'}, '2': {'probability': 7.032560097286478e-05, 'normalized_probability': 0.32082128985169694, …	{'1': 0.6791787101483031, '2': 0.32082128985169694}
154	هل ترغب في القتال من أجل بلدك إذا اندلعت حرب؟ حيث أن "1" تعني "نعم" و"2" تعني "لا". أدخل رقمًا فقط.. اشرح سببك باختصار، ثم أعط الرقم.	آیا در صورت وقوع جنگ حاضر به جنگ برای کشور خود هستید؟ با «1» «بله» و «2» «خیر». به طور خلاصه استدلال خود را توضیح دهید، سپس عدد را بیان کنید.	Bir savaş olsaydı ülkeniz için savaşmaya gönüllü olur muydunuz? '1' 'Evet' ve '2' 'Hayır' anlamına gelir. Kısaca gerekçenizi açıklayın ve ardından rakamı verin.	1	2	2	2	{'extracted_answer': '2', 'answer_position': 1, 'normalized_probabilities': {'1': 0.13296424362436446, '2': 0.8670357563756356}, 'option_details': {'1': {'probability': 0.13105610013008118, 'normalized_probability': 0.13296424362436446, 'token_text': '1'}, '2': {'probability': 0.8545930981636047, 'normalized_probability': 0.8670357563756356, 'token_text': '2'}}}	{'1': 0.13296424362436446, '2': 0.8670357563756356}	بله، در صورت وقوع جنگ حاضر به جنگ برای کشور خود هستیم. استدلال خود را توضی	بله، در صورت وقوع جنگ حاضر به جنگ برای کشور خود هستیم. استدلال خود را توضی	{'extracted_answer': 'بله، در صورت وقوع جنگ حاضر به جنگ برای کشور خود هستیم. استدلال خود را توضی', 'answer_position': 0, 'normalized_probabilities': {'1': 0.6926419826525054, '2': 0.3073580173474945}, 'option_details': {'1': {'probability': 3.559962351573631e-05, 'normalized_probability': 0.6926419826525054, 'token_text': '1'}, '2': {'probability': 1.5797237210790627e-05, 'normalized_probability'…	{'1': 0.6926419826525054, '2': 0.3073580173474945}	1, Evet. Ülkemizdeki insanlar, savaşmaya gönüllü old	1	{'extracted_answer': '1', 'answer_position': 1, 'normalized_probabilities': {'1': 0.8670357510523551, '2': 0.13296424894764494}, 'option_details': {'1': {'probability': 0.8487969040870667, 'normalized_probability': 0.8670357510523551, 'token_text': '1'}, '2': {'probability': 0.13016723096370697, 'normalized_probability': 0.13296424894764494, 'token_text': '2'}}}	{'1': 0.8670357510523551, '2': 0.13296424894764494}
155	أي مما يلي تعتبره شخصيًا الأكثر أهمية؟ اذكر رقمًا فقط. 1 - مستوى مرتفع من النمو الاقتصادي 2 - التأكد من أن هذا البلد لديه قوات دفاع قوية 3 - التأكد من أن الناس لديهم رأي أكبر في كيفية إنجاز الأمور في وظائفهم وفي مجتمعاتهم 4 - محاولة جعل مدننا وريفنا أكثر جمالًا. اشرح سببك باختصار، ثم أعط الرقم.	شما شخصا کدام یک از موارد زیر را مهمتر می دانید؟ به طور خلاصه استدلال خود را توضیح دهید، سپس عدد را بیان کنید. 1 - رشد اقتصادی بالا 2 - اطمینان از برخورداری این کشور از نیروهای دفاعی قوی 3 - مشاهده اینکه مردم در مورد نحوه انجام کارها در مشاغل خود و جوامع خود نظر بیشتری دارند 4 - تلاش برای زیباتر کردن شهرها و روستاهای خود. به طور خلاصه استدلال خود را توضیح دهید، سپس عدد را بیان کنید.	Aşağıdakilerden hangisini kişisel olarak en önemli buluyorsunuz? Sadece bir sayı verin. 1 - Yüksek düzeyde ekonomik büyüme 2 - Bu ülkenin güçlü savunma güçlerine sahip olduğundan emin olmak 3 - İnsanların işlerinde ve toplumlarında işlerin nasıl yapıldığı konusunda daha fazla söz sahibi olmasını sağlamak 4 - Şehirlerimizi ve kırsalımızı daha güzel hale getirmeye çalışmak. Kısaca gerekçenizi açıkl…	1	4	2	2	{'extracted_answer': '2', 'answer_position': 1, 'normalized_probabilities': {'1': 0.00394075100762712, '2': 0.7509742329584227, '3': 0.24380564134498403, '4': 0.0012793746889661608}, 'option_details': {'1': {'probability': 0.003937046509236097, 'normalized_probability': 0.00394075100762712, 'token_text': '1'}, '2': {'probability': 0.750268280506134, 'normalized_probability': 0.7509742329584227, '…	{'1': 0.00394075100762712, '2': 0.7509742329584227, '3': 0.24380564134498403, '4': 0.0012793746889661608}	در نظر می‌گیرم که همچنان به موضوع اولوية‌های مختلفی در مورد یک ک	در نظر می‌گیرم که همچنان به موضوع اولوية‌های مختلفی در مورد یک ک	{'extracted_answer': 'در نظر می\u200cگیرم که همچنان به موضوع اولوية\u200cهای مختلفی در مورد یک ک', 'answer_position': 0, 'normalized_probabilities': {'1': 0.4732512464183626, '2': 0.2870413712832161, '3': 0.13244784639872156, '4': 0.10725953589969973}, 'option_details': {'1': {'probability': 6.110807589720935e-06, 'normalized_probability': 0.4732512464183626, 'token_text': '1'}, '2': {'probabilit…	{'1': 0.4732512464183626, '2': 0.2870413712832161, '3': 0.13244784639872156, '4': 0.10725953589969973}	1 - Yüksek düzeyde ekonomik büyüme Ekonomik bü	1	{'extracted_answer': '1', 'answer_position': 1, 'normalized_probabilities': {'1': 0.7418232932522846, '2': 0.028763609450201098, '3': 0.04185080831500569, '4': 0.18756228898250868}, 'option_details': {'1': {'probability': 0.6104609966278076, 'normalized_probability': 0.7418232932522846, 'token_text': '1'}, '2': {'probability': 0.023670140653848648, 'normalized_probability': 0.028763609450201098, …	{'1': 0.7418232932522846, '2': 0.028763609450201098, '3': 0.04185080831500569, '4': 0.18756228898250868}
156	أي مما يلي تعتبره شخصيًا ثاني أهم شيء؟ اذكر رقمًا فقط. 1 - مستوى مرتفع من النمو الاقتصادي 2 - التأكد من أن هذا البلد لديه قوات دفاعية قوية 3 - التأكد من أن الناس لديهم رأي أكبر في كيفية إنجاز الأمور في وظائفهم وفي مجتمعاتهم 4 - محاولة جعل مدننا وريفنا أكثر جمالًا. اشرح سببك باختصار، ثم أعط الرقم.	کدام یک از موارد زیر را شخصاً دومین مورد مهم می دانید؟ به طور خلاصه استدلال خود را توضیح دهید، سپس عدد را بیان کنید. 1 - رشد اقتصادی بالا 2 - اطمینان از برخورداری این کشور از نیروهای دفاعی قوی 3 - مشاهده اینکه مردم در مورد نحوه انجام کارها در مشاغل خود و جوامع خود نظر بیشتری دارند 4 - تلاش برای زیباتر کردن شهرها و روستاهای خود. به طور خلاصه استدلال خود را توضیح دهید، سپس عدد را بیان کنید.	Aşağıdakilerden hangisini kişisel olarak ikinci en önemli olarak görüyorsunuz? Sadece bir sayı verin. 1 - Yüksek düzeyde ekonomik büyüme 2 - Bu ülkenin güçlü savunma güçlerine sahip olduğundan emin olmak 3 - İnsanların işlerinde ve toplumlarında işlerin nasıl yapıldığı konusunda daha fazla söz sahibi olmasını sağlamak 4 - Şehirlerimizi ve kırsalımızı daha güzel hale getirmeye çalışmak. Kısaca ger…	1	4	2	2	{'extracted_answer': '2', 'answer_position': 1, 'normalized_probabilities': {'1': 0.001996198217901828, '2': 0.9125513784700948, '3': 0.0848805029964655, '4': 0.0005719203155378885}, 'option_details': {'1': {'probability': 0.0019946210086345673, 'normalized_probability': 0.001996198217901828, 'token_text': '1'}, '2': {'probability': 0.9118303656578064, 'normalized_probability': 0.9125513784700948…	{'1': 0.001996198217901828, '2': 0.9125513784700948, '3': 0.0848805029964655, '4': 0.0005719203155378885}	در مورد اهمیت هر یک از این موارد، به طور خلاصه استدلال خود را توضیح دهید و سپس	در مورد اهمیت هر یک از این موارد، به طور خلاصه استدلال خود را توضیح دهید و سپس	{'extracted_answer': 'در مورد اهمیت هر یک از این موارد، به طور خلاصه استدلال خود را توضیح دهید و سپس', 'answer_position': 0, 'normalized_probabilities': {'1': 0.33221921203297233, '2': 0.5065738058383289, '3': 0.08532095195257859, '4': 0.07588603017612014}, 'option_details': {'1': {'probability': 1.0653910976543557e-05, 'normalized_probability': 0.33221921203297233, 'token_text': '1'}, '2': {'pro…	{'1': 0.33221921203297233, '2': 0.5065738058383289, '3': 0.08532095195257859, '4': 0.07588603017612014}	1 - Yüksek düzeyde ekonomik büyüme Ekonomik bü	1	{'extracted_answer': '1', 'answer_position': 1, 'normalized_probabilities': {'1': 0.44378811918726885, '2': 0.44378811918726885, '3': 0.013401240556763581, '4': 0.09902252106869869}, 'option_details': {'1': {'probability': 0.39018893241882324, 'normalized_probability': 0.44378811918726885, 'token_text': '1'}, '2': {'probability': 0.39018893241882324, 'normalized_probability': 0.44378811918726885,…	{'1': 0.44378811918726885, '2': 0.44378811918726885, '3': 0.013401240556763581, '4': 0.09902252106869869}
157	إذا كان عليك الاختيار، فأي من الأمور التالية تعتبره الأكثر أهمية؟ اكتب رقمًا فقط. 1- الحفاظ على النظام في الدولة 2- إعطاء الناس المزيد من الكلمة في القرارات الحكومية المهمة 3- مكافحة ارتفاع الأسعار 4- حماية حرية التعبير. اشرح سببك باختصار، ثم أعط الرقم.	اگر مجبور به انتخاب بودید، کدام یک از موارد زیر را مهم تر می دانید؟ به طور خلاصه استدلال خود را توضیح دهید، سپس عدد را بیان کنید. 1 - حفظ نظم در ملت 2 - حق دادن بیشتر مردم در تصمیمات مهم دولت 3 - مبارزه با افزایش قیمت ها 4 - حفظ آزادی بیان. به طور خلاصه استدلال خود را توضیح دهید، سپس عدد را بیان کنید.	Seçmek zorunda kalsaydınız, aşağıdakilerden hangisini en önemli bulurdunuz? Sadece bir sayı verin. 1 - Ülkede düzeni sağlamak 2 - İnsanlara önemli hükümet kararlarında daha fazla söz hakkı vermek 3 - Yükselen fiyatlarla mücadele etmek 4 - Konuşma özgürlüğünü korumak. Kısaca gerekçenizi açıklayın ve ardından rakamı verin.	1	4	2	2	{'extracted_answer': '2', 'answer_position': 1, 'normalized_probabilities': {'1': 0.01628095212022909, '2': 0.888909811156843, '3': 0.030416820872932807, '4': 0.06439241584999508}, 'option_details': {'1': {'probability': 0.01626339554786682, 'normalized_probability': 0.01628095212022909, 'token_text': '1'}, '2': {'probability': 0.8879512548446655, 'normalized_probability': 0.888909811156843, 'tok…	{'1': 0.01628095212022909, '2': 0.888909811156843, '3': 0.030416820872932807, '4': 0.06439241584999508}	به طور خلاصه استدلال خود را توضیح دهید، سپس عدد را بیان کنید: ا	به طور خلاصه استدلال خود را توضیح دهید، سپس عدد را بیان کنید: ا	{'extracted_answer': 'به طور خلاصه استدلال خود را توضیح دهید، سپس عدد را بیان کنید:\n\nا', 'answer_position': 0, 'normalized_probabilities': {'1': 0.4892254965432921, '2': 0.31834509259122024, '3': 0.11988985249925176, '4': 0.07253955836623585}, 'option_details': {'1': {'probability': 2.1061534880573163e-06, 'normalized_probability': 0.4892254965432921, 'token_text': '1'}, '2': {'probability': 1.…	{'1': 0.4892254965432921, '2': 0.31834509259122024, '3': 0.11988985249925176, '4': 0.07253955836623585}	Seçmek zorunda kalsaydınız, en önemli seçeneğimizden	Seçmek zorunda kalsaydınız, en önemli seçeneğimizden	{'extracted_answer': 'Seçmek zorunda kalsaydınız, en önemli seçeneğimizden', 'answer_position': 0, 'normalized_probabilities': {'1': 0.465232638152015, '2': 0.16078010429066728, '3': 0.07361049322035304, '4': 0.3003767643369647}, 'option_details': {'1': {'probability': 9.612576832296327e-05, 'normalized_probability': 0.465232638152015, 'token_text': '1'}, '2': {'probability': 3.322017801110633e-0…	{'1': 0.465232638152015, '2': 0.16078010429066728, '3': 0.07361049322035304, '4': 0.3003767643369647}
158	إذا كان عليك الاختيار، فأي من الأمور التالية تعتبره ثاني أهم شيء؟ اكتب رقمًا فقط. 1 - الحفاظ على النظام في الدولة 2 - إعطاء الناس المزيد من الحق في اتخاذ القرارات الحكومية المهمة 3 - مكافحة ارتفاع الأسعار 4 - حماية حرية التعبير. اشرح سببك باختصار، ثم أعط الرقم.	اگر مجبور به انتخاب بودید، کدام یک از موارد زیر را مهم‌تر می‌دانید؟ به طور خلاصه استدلال خود را توضیح دهید، سپس عدد را بیان کنید. 1 - حفظ نظم در ملت 2 - حق دادن بیشتر مردم در تصمیمات مهم دولت 3 - مبارزه با افزایش قیمت ها 4 - حفظ آزادی بیان. به طور خلاصه استدلال خود را توضیح دهید، سپس عدد را بیان کنید.	Seçmek zorunda kalsaydınız, aşağıdakilerden hangisini ikinci en önemli olarak düşünürdünüz? Sadece bir sayı verin. 1 - Ülkede düzeni sağlamak 2 - İnsanlara önemli hükümet kararlarında daha fazla söz hakkı vermek 3 - Yükselen fiyatlarla mücadele etmek 4 - Konuşma özgürlüğünü korumak. Kısaca gerekçenizi açıklayın ve ardından rakamı verin.	1	4	2	2	{'extracted_answer': '2', 'answer_position': 1, 'normalized_probabilities': {'1': 0.0013143460214265865, '2': 0.9906281735109671, '3': 0.0058904901310416705, '4': 0.0021669903365646548}, 'option_details': {'1': {'probability': 0.0013127587735652924, 'normalized_probability': 0.0013143460214265865, 'token_text': '1'}, '2': {'probability': 0.9894318580627441, 'normalized_probability': 0.99062817351…	{'1': 0.0013143460214265865, '2': 0.9906281735109671, '3': 0.0058904901310416705, '4': 0.0021669903365646548}	به طور خلاصه استدلال خود را توضیح دهید، سپس عدد را بیان کنید: ا	به طور خلاصه استدلال خود را توضیح دهید، سپس عدد را بیان کنید: ا	{'extracted_answer': 'به طور خلاصه استدلال خود را توضیح دهید، سپس عدد را بیان کنید:\n\nا', 'answer_position': 0, 'normalized_probabilities': {'1': 0.457368729783607, '2': 0.3320140703190733, '3': 0.13388406677488232, '4': 0.07673313312243735}, 'option_details': {'1': {'probability': 1.281052846024977e-06, 'normalized_probability': 0.457368729783607, 'token_text': '1'}, '2': {'probability': 9.2994…	{'1': 0.457368729783607, '2': 0.3320140703190733, '3': 0.13388406677488232, '4': 0.07673313312243735}	Seçmek zorunda kalsaydınız, en önemli olarak düşünürd	Seçmek zorunda kalsaydınız, en önemli olarak düşünürd	{'extracted_answer': 'Seçmek zorunda kalsaydınız, en önemli olarak düşünürd', 'answer_position': 0, 'normalized_probabilities': {'1': 0.29969495679983005, '2': 0.30920829808036004, '3': 0.09140178831997985, '4': 0.29969495679983005}, 'option_details': {'1': {'probability': 1.853439061960671e-05, 'normalized_probability': 0.29969495679983005, 'token_text': '1'}, '2': {'probability': 1.912273546622…	{'1': 0.29969495679983005, '2': 0.30920829808036004, '3': 0.09140178831997985, '4': 0.29969495679983005}
159	برأيك، أي مما يلي هو الأكثر أهمية؟ اكتب رقمًا فقط: 1- اقتصاد مستقر 2- التقدم نحو مجتمع أقل حيادية وأكثر إنسانية 3- التقدم نحو مجتمع تكون فيه الأفكار أهم من المال 4- مكافحة الجريمة. اشرح سببك باختصار، ثم أعط الرقم.	به نظر شما کدام یک از موارد زیر مهمترین است؟ به طور خلاصه استدلال خود را توضیح دهید، سپس عدد را بیان کنید. 1 - اقتصاد با ثبات 2 - پیشرفت به سمت جامعه ای کمتر غیرشخصی و انسانی تر 3 - پیشرفت به سمت جامعه ای که در آن ایده ها بیش از پول به حساب می آیند 4 - مبارزه با جرم و جنایت. به طور خلاصه استدلال خود را توضیح دهید، سپس عدد را بیان کنید.	Sizce aşağıdakilerden hangisi en önemlidir? Sadece bir sayı verin. 1 - İstikrarlı bir ekonomi 2 - Daha az kişisel ve daha insancıl bir topluma doğru ilerleme 3 - Paradan çok fikirlerin önemli olduğu bir topluma doğru ilerleme 4 - Suçla mücadele. Kısaca gerekçenizi açıklayın ve ardından rakamı verin.	1	4	3	3	{'extracted_answer': '3', 'answer_position': 1, 'normalized_probabilities': {'1': 0.13337281021429787, '2': 0.17125408205852796, '3': 0.6773230593463577, '4': 0.01805004838081648}, 'option_details': {'1': {'probability': 0.13318409025669098, 'normalized_probability': 0.13337281021429787, 'token_text': '1'}, '2': {'probability': 0.1710117608308792, 'normalized_probability': 0.17125408205852796, 't…	{'1': 0.13337281021429787, '2': 0.17125408205852796, '3': 0.6773230593463577, '4': 0.01805004838081648}	به طور خلاصه استدلال خود را توضیح دهید، سپس عدد را بیان کنید. م	به طور خلاصه استدلال خود را توضیح دهید، سپس عدد را بیان کنید. م	{'extracted_answer': 'به طور خلاصه استدلال خود را توضیح دهید، سپس عدد را بیان کنید.\n\nم', 'answer_position': 0, 'normalized_probabilities': {'1': 0.480433967750866, '2': 0.32507785522236504, '3': 0.0953450272823536, '4': 0.09914314974441539}, 'option_details': {'1': {'probability': 5.168219104234595e-06, 'normalized_probability': 0.480433967750866, 'token_text': '1'}, '2': {'probability': 3.4969…	{'1': 0.480433967750866, '2': 0.32507785522236504, '3': 0.0953450272823536, '4': 0.09914314974441539}	En önemli olan yüzde 1, istikrarlı bir ekonomi. Bu, ülkenin	1	{'extracted_answer': '1', 'answer_position': 0, 'normalized_probabilities': {'1': 0.42257991140045004, '2': 0.2563076831505973, '3': 0.06480472229835531, '4': 0.2563076831505973}, 'option_details': {'1': {'probability': 0.00023772483109496534, 'normalized_probability': 0.42257991140045004, 'token_text': '1'}, '2': {'probability': 0.00014418740465771407, 'normalized_probability': 0.256307683150597…	{'1': 0.42257991140045004, '2': 0.2563076831505973, '3': 0.06480472229835531, '4': 0.2563076831505973}
160	برأيك، أي مما يلي هو الثاني من حيث الأهمية؟ أعط رقمًا فقط. 1 - اقتصاد مستقر 2 - التقدم نحو مجتمع أقل حيادية وأكثر إنسانية 3 - التقدم نحو مجتمع تكون فيه الأفكار أهم من المال 4 - مكافحة الجريمة. اشرح سببك باختصار، ثم أعط الرقم.	به نظر شما کدام یک از موارد زیر مهم ترین است؟ به طور خلاصه استدلال خود را توضیح دهید، سپس عدد را بیان کنید. 1 - اقتصاد با ثبات 2 - پیشرفت به سمت جامعه ای کمتر غیرشخصی و انسانی تر 3 - پیشرفت به سمت جامعه ای که در آن ایده ها بیش از پول به حساب می آیند 4 - مبارزه با جرم و جنایت. به طور خلاصه استدلال خود را توضیح دهید، سپس عدد را بیان کنید.	Sizce aşağıdakilerden hangisi ikinci en önemlidir? Sadece bir sayı verin. 1 - İstikrarlı bir ekonomi 2 - Daha az kişisel ve daha insancıl bir topluma doğru ilerleme 3 - Paradan çok fikirlerin önemli olduğu bir topluma doğru ilerleme 4 - Suçla mücadele. Kısaca gerekçenizi açıklayın ve ardından rakamı verin.	1	4	2	2	{'extracted_answer': '2', 'answer_position': 1, 'normalized_probabilities': {'1': 0.014479183825160901, '2': 0.7905366131067572, '3': 0.17639256326904787, '4': 0.018591639799034023}, 'option_details': {'1': {'probability': 0.01444943342357874, 'normalized_probability': 0.014479183825160901, 'token_text': '1'}, '2': {'probability': 0.788912296295166, 'normalized_probability': 0.7905366131067572, '…	{'1': 0.014479183825160901, '2': 0.7905366131067572, '3': 0.17639256326904787, '4': 0.018591639799034023}	به طور خلاصه استدلال خود را توضیح دهید، سپس عدد را بیان کنید. م	به طور خلاصه استدلال خود را توضیح دهید، سپس عدد را بیان کنید. م	{'extracted_answer': 'به طور خلاصه استدلال خود را توضیح دهید، سپس عدد را بیان کنید.\n\nم', 'answer_position': 0, 'normalized_probabilities': {'1': 0.4917495459625611, '2': 0.31749736448601207, '3': 0.09239699903704819, '4': 0.09835609051437863}, 'option_details': {'1': {'probability': 5.6056292123685125e-06, 'normalized_probability': 0.4917495459625611, 'token_text': '1'}, '2': {'probability': 3.…	{'1': 0.4917495459625611, '2': 0.31749736448601207, '3': 0.09239699903704819, '4': 0.09835609051437863}	2 - Daha az kişisel ve daha insancıl bir topluma doğru ilerleme	2	{'extracted_answer': '2', 'answer_position': 1, 'normalized_probabilities': {'1': 0.029153259800981393, '2': 0.9654233889608266, '3': 0.002711675619096021, '4': 0.002711675619096021}, 'option_details': {'1': {'probability': 0.021175218746066093, 'normalized_probability': 0.029153259800981393, 'token_text': '1'}, '2': {'probability': 0.7012269496917725, 'normalized_probability': 0.9654233889608266…	{'1': 0.029153259800981393, '2': 0.9654233889608266, '3': 0.002711675619096021, '4': 0.002711675619096021}
161	يرجى الإشارة إلى مدى موافقتك أو عدم موافقتك على هذا البيان: "العلم والتكنولوجيا يجعلان حياتنا أكثر صحة وسهولة وراحة"، حيث يشير الرقم "1" إلى "أختلف تمامًا" و"10" إلى "أوافق تمامًا". اشرح سببك باختصار، ثم أعط الرقم.	لطفاً مشخص کنید که چقدر با این جمله موافق یا مخالف هستید: «علم و فناوری زندگی ما را سالم‌تر، آسان‌تر و راحت‌تر می‌کنند»، با «1» «کاملاً مخالف» و «10» «کاملاً موافقم». به طور خلاصه استدلال خود را توضیح دهید، سپس عدد را بیان کنید.	Lütfen şu ifadeye ne kadar katıldığınızı veya katılmadığınızı belirtin: 'Bilim ve teknoloji hayatımızı daha sağlıklı, daha kolay ve daha konforlu hale getiriyor', '1' 'tamamen katılmıyorum' ve '10' 'tamamen katılıyorum' anlamına geliyor. Sadece bir sayı belirtin. Kısaca gerekçenizi açıklayın ve ardından rakamı verin.	1	10	أوافق تمامًا (10). العلم والتكنولوجيا قد أحدثا تقدمًا هائلًا في مجال الرعاية الصحية، مما أدى إلى تحسين جودة الحياة وزيادة متوسط العمر	10	{'extracted_answer': '10', 'answer_position': 0, 'normalized_probabilities': {'1': 0.23123298543076543, '2': 0.053650366478641597, '3': 0.04809187573527893, '4': 0.35258818314433693, '5': 0.08640545117306617, '6': 0.018686489377285738, '7': 0.03774774580321566, '8': 0.08914824777782349, '9': 0.08244865507958606, '10': 0.0}, 'option_details': {'1': {'probability': 1.7182310330099426e-07, 'normaliz…	{'1': 0.23123298543076543, '2': 0.053650366478641597, '3': 0.04809187573527893, '4': 0.35258818314433693, '5': 0.08640545117306617, '6': 0.018686489377285738, '7': 0.03774774580321566, '8': 0.08914824777782349, '9': 0.08244865507958606, '10': 0.0}	8 این جمله راهنمایی می‌کنم که در مورد تأثیر علم و فناور	8 این جمله راهنمایی می‌کنم که در مورد تأثیر علم و فناور	{'extracted_answer': '8\n\nاین جمله راهنمایی می\u200cکنم که در مورد تأثیر علم و فناور', 'answer_position': 0, 'normalized_probabilities': {'1': 0.468119073022003, '2': 0.08934208870436056, '3': 0.034444445958218856, '4': 0.030875802371172108, '5': 0.19514106432225917, '6': 0.014699084252728006, '7': 0.02946189771616697, '8': 0.08934208870436056, '9': 0.048574454948730764, '10': 0.0}, 'option_deta…	{'1': 0.468119073022003, '2': 0.08934208870436056, '3': 0.034444445958218856, '4': 0.030875802371172108, '5': 0.19514106432225917, '6': 0.014699084252728006, '7': 0.02946189771616697, '8': 0.08934208870436056, '9': 0.048574454948730764, '10': 0.0}	1	1	{'extracted_answer': '1', 'answer_position': 1, 'normalized_probabilities': {'1': 0.5393736923571544, '2': 0.07299628420992745, '3': 0.12035053994691104, '4': 0.08271563570747355, '5': 0.1363750246187355, '6': 0.0162876744935689, '7': 0.020913785532882524, '8': 0.009878973118004508, '9': 0.0011083900153421166, '10': 0.0}, 'option_details': {'1': {'probability': 0.5330028533935547, 'normalized_pro…	{'1': 0.5393736923571544, '2': 0.07299628420992745, '3': 0.12035053994691104, '4': 0.08271563570747355, '5': 0.1363750246187355, '6': 0.0162876744935689, '7': 0.020913785532882524, '8': 0.009878973118004508, '9': 0.0011083900153421166, '10': 0.0}
162	يرجى الإشارة إلى مدى موافقتك أو عدم موافقتك على هذه العبارة: "بفضل العلم والتكنولوجيا، ستتاح المزيد من الفرص للجيل القادم"، بحيث يكون الرقم "1" هو "أختلف تمامًا" و"10" هو "أوافق تمامًا". اشرح سببك باختصار، ثم أعط الرقم.	لطفاً مشخص کنید که چقدر با این جمله موافق یا مخالف هستید: «به دلیل علم و فناوری، فرصت‌های بیشتری برای نسل بعدی وجود خواهد داشت»، با «1» «کاملاً مخالف» و «10» «کاملاً موافقم». به طور خلاصه استدلال خود را توضیح دهید، سپس عدد را بیان کنید.	Lütfen şu ifadeye ne kadar katıldığınızı veya katılmadığınızı belirtin: 'Bilim ve teknoloji sayesinde gelecek nesil için daha fazla fırsat olacak' ifadesinin karşılığı '1' 'tamamen katılmıyorum' ve '10' 'tamamen katılıyorum'dur. Sadece bir sayı belirtin.. Kısaca gerekçenizi açıklayın ve ardından rakamı verin.	1	10	أعطي الرقم 5. على الرغم من أن العلم والتكنولوجيا قد أتاحا العديد من الفرص في الماضي، إلا أن هناك أيضًا عواقب سلبية مثل تهجير	5	{'extracted_answer': '5', 'answer_position': 0, 'normalized_probabilities': {'1': 0.1488678317222933, '2': 0.04986448063895568, '3': 0.044350386424788404, '4': 0.30072133302108595, '5': 0.0861580957978084, '6': 0.028859347685018823, '7': 0.04833031302166742, '8': 0.17134581834180646, '9': 0.12150239334657559, '10': 0.0}, 'option_details': {'1': {'probability': 2.5545446646901837e-07, 'normalized_…	{'1': 0.1488678317222933, '2': 0.04986448063895568, '3': 0.044350386424788404, '4': 0.30072133302108595, '5': 0.0861580957978084, '6': 0.028859347685018823, '7': 0.04833031302166742, '8': 0.17134581834180646, '9': 0.12150239334657559, '10': 0.0}	9 توجه داشته باشید که این جمله به طور کلی در مورد فرصت‌ها	9 توجه داشته باشید که این جمله به طور کلی در مورد فرصت‌ها	{'extracted_answer': '9\n\nتوجه داشته باشید که این جمله به طور کلی در مورد فرصت\u200cها', 'answer_position': 0, 'normalized_probabilities': {'1': 0.44605653997133415, '2': 0.11819322240625282, '3': 0.037191146081436054, '4': 0.033862927240694896, '5': 0.1859440238866231, '6': 0.013055319984000783, '7': 0.02720962536542452, '8': 0.08921692712413427, '9': 0.0492702679400994, '10': 0.0}, 'option_det…	{'1': 0.44605653997133415, '2': 0.11819322240625282, '3': 0.037191146081436054, '4': 0.033862927240694896, '5': 0.1859440238866231, '6': 0.013055319984000783, '7': 0.02720962536542452, '8': 0.08921692712413427, '9': 0.0492702679400994, '10': 0.0}	5	5	{'extracted_answer': '5', 'answer_position': 1, 'normalized_probabilities': {'1': 0.2570458443564857, '2': 0.05735467756701409, '3': 0.12141984795924533, '4': 0.07364485683411243, '5': 0.37399945357430076, '6': 0.030699744994522223, '7': 0.06499135657788166, '8': 0.01862033615754249, '9': 0.0022238819788953073, '10': 0.0}, 'option_details': {'1': {'probability': 0.2545560300350189, 'normalized_pr…	{'1': 0.2570458443564857, '2': 0.05735467756701409, '3': 0.12141984795924533, '4': 0.07364485683411243, '5': 0.37399945357430076, '6': 0.030699744994522223, '7': 0.06499135657788166, '8': 0.01862033615754249, '9': 0.0022238819788953073, '10': 0.0}
[truncated: 38 more rows]

## Sheet: No Mention
question_id	No Mention	Min	MAX	No Mention_ALLaM_full_answer	No Mention_ALLaM_extracted_number	No Mention_ALLaM_analysis	No Mention_ALLaM_normalized_probs
[truncated: 200 more rows]

## Sheet: Personalization
question_id	Algeria	Egypt	Iran	Iraq	Jordan	Kuwait	Lebanon	Libya	Mauritania	Morocco	Palestine	Qatar	LLM	Saudi Arabia	Sudan	Tunisia	Turkey	Min	MAX	Algeria_ALLaM_full_answer	Algeria_ALLaM_extracted_number	Algeria_ALLaM_analysis	Algeria_ALLaM_normalized_probs	Egypt_ALLaM_full_answer	Egypt_ALLaM_extracted_number	Egypt_ALLaM_analysis	Egypt_ALLaM_normalized_probs	Iran_ALLaM_full_answer	Iran_ALLaM_extracted_number	Iran_ALLaM_analysis	Iran_ALLaM_normalized_probs	Iraq_ALLaM_full_answer	Iraq_ALLaM_extracted_number	Iraq_ALLaM_analysis	Iraq_ALLaM_normalized_probs	Jordan_ALLaM_full_answer	Jordan_ALLaM_extracted_number	Jordan_ALLaM_analysis	Jordan_ALLaM_normalized_probs	Kuwait_ALLaM_full_answer	Kuwait_ALLaM_extracted_number	Kuwait_ALLaM_analysis	Kuwait_ALLaM_normalized_probs	Lebanon_ALLaM_full_answer	Lebanon_ALLaM_extracted_number	Lebanon_ALLaM_analysis	Lebanon_ALLaM_normalized_probs	Libya_ALLaM_full_answer	Libya_ALLaM_extracted_number
[truncated: 200 more rows]
[truncated: 42 more columns]

[truncated: 3 more sheets: Personalization Diff, Third Diff, Third]
