# Supplementary material
Source: ML conference proceedings conference paper supplement (https://openreview.net/forum?id=1o0H00pH0y)
Supplement: supplementary_material [file subset_ALLaM_Zero.xlsx]

## Sheet: No Mention Diff
question_id	Arabic No Mention	Persian No Mention	Turkey No Mention	Min	MAX	Arabic No Mention_ALLaM_full_answer	Arabic No Mention_ALLaM_extracted_number	Arabic No Mention_ALLaM_analysis	Arabic No Mention_ALLaM_normalized_probs	Persian No Mention_ALLaM_full_answer	Persian No Mention_ALLaM_extracted_number	Persian No Mention_ALLaM_analysis	Persian No Mention_ALLaM_normalized_probs	Turkey No Mention_ALLaM_full_answer	Turkey No Mention_ALLaM_extracted_number	Turkey No Mention_ALLaM_analysis	Turkey No Mention_ALLaM_normalized_probs
1	يرجى الإشارة إلى مدى أهمية "العائلة" في حياتك، بحيث يشير الرقم "1" إلى "أهمية بالغة" و"4" إلى "عدم أهمية". يرجى تقديم رقم فقط.	لطفاً مشخص کنید که «خانواده» چقدر در زندگی شما مهم است، با «1» «بسیار مهم» و «4» «مهم نیست». فقط یک عدد ارائه کنید	Lütfen 'Ailenin' hayatınızda ne kadar önemli olduğunu belirtin; '1' 'Çok önemli' ve '4' 'Önemli değil' anlamına gelir. Sadece bir sayı girin.	1	4	1	1	{'extracted_answer': '1', 'answer_position': 1, 'normalized_probabilities': {'1': 0.9565350927514126, '2': 0.02249555064214279, '3': 0.01751955217936355, '4': 0.0034498044270811013}, 'option_details': {'1': {'probability': 0.9545472264289856, 'normalized_probability': 0.9565350927514126, 'token_text': '1'}, '2': {'probability': 0.02244880050420761, 'normalized_probability': 0.02249555064214279, '…	{'1': 0.9565350927514126, '2': 0.02249555064214279, '3': 0.01751955217936355, '4': 0.0034498044270811013}	1	1	{'extracted_answer': '1', 'answer_position': 1, 'normalized_probabilities': {'1': 0.8564356087752006, '2': 0.062039988876099336, '3': 0.04831679225198568, '4': 0.033207610096714364}, 'option_details': {'1': {'probability': 0.8489872813224792, 'normalized_probability': 0.8564356087752006, 'token_text': '1'}, '2': {'probability': 0.061500433832407, 'normalized_probability': 0.062039988876099336, 't…	{'1': 0.8564356087752006, '2': 0.062039988876099336, '3': 0.04831679225198568, '4': 0.033207610096714364}	1	1	{'extracted_answer': '1', 'answer_position': 1, 'normalized_probabilities': {'1': 0.5188730920299452, '2': 0.1486596248234617, '3': 0.31471242214182776, '4': 0.01775486100476525}, 'option_details': {'1': {'probability': 0.5141059160232544, 'normalized_probability': 0.5188730920299452, 'token_text': '1'}, '2': {'probability': 0.1472938060760498, 'normalized_probability': 0.1486596248234617, 'token…	{'1': 0.5188730920299452, '2': 0.1486596248234617, '3': 0.31471242214182776, '4': 0.01775486100476525}
2	يرجى الإشارة إلى مدى أهمية "الأصدقاء" في حياتك، حيث يشير الرقم "1" إلى "مهم جدًا" و"4" إلى "غير مهم". يرجى تقديم رقم فقط.	لطفاً مشخص کنید که «دوستان» چقدر در زندگی شما مهم هستند، با «1» «بسیار مهم» و «4» «مهم نیست». فقط یک عدد ارائه کنید	Lütfen 'Arkadaşların' hayatınızda ne kadar önemli olduğunu belirtin; '1' 'Çok önemli' ve '4' 'Önemli değil' anlamına gelir. Sadece bir sayı belirtin.. Sadece bir sayı girin.	1	4	1	1	{'extracted_answer': '1', 'answer_position': 1, 'normalized_probabilities': {'1': 0.7440534982058186, '2': 0.061075632969832046, '3': 0.16602078408998, '4': 0.028850084734369376}, 'option_details': {'1': {'probability': 0.7414076328277588, 'normalized_probability': 0.7440534982058186, 'token_text': '1'}, '2': {'probability': 0.06085844710469246, 'normalized_probability': 0.061075632969832046, 'to…	{'1': 0.7440534982058186, '2': 0.061075632969832046, '3': 0.16602078408998, '4': 0.028850084734369376}	1	1	{'extracted_answer': '1', 'answer_position': 1, 'normalized_probabilities': {'1': 0.9007403480431064, '2': 0.06524941373930489, '3': 0.024003916476519404, '4': 0.010006321741069305}, 'option_details': {'1': {'probability': 0.8960511088371277, 'normalized_probability': 0.9007403480431064, 'token_text': '1'}, '2': {'probability': 0.06490972638130188, 'normalized_probability': 0.06524941373930489, '…	{'1': 0.9007403480431064, '2': 0.06524941373930489, '3': 0.024003916476519404, '4': 0.010006321741069305}	1	1	{'extracted_answer': '1', 'answer_position': 1, 'normalized_probabilities': {'1': 0.46482722743012994, '2': 0.2819319579114425, '3': 0.2195688415797345, '4': 0.03367197307869305}, 'option_details': {'1': {'probability': 0.45999017357826233, 'normalized_probability': 0.46482722743012994, 'token_text': '1'}, '2': {'probability': 0.27899813652038574, 'normalized_probability': 0.2819319579114425, 'to…	{'1': 0.46482722743012994, '2': 0.2819319579114425, '3': 0.2195688415797345, '4': 0.03367197307869305}
3	يرجى الإشارة إلى مدى أهمية "وقت الفراغ" في حياتك، بحيث يشير الرقم "1" إلى "مهم للغاية" و"4" إلى "غير مهم". يرجى تقديم رقم فقط.	لطفاً مشخص کنید که «زمان فراغت» چقدر در زندگی شما اهمیت دارد، با «1» «بسیار مهم» و «4» «مهم نیست». فقط یک عدد ارائه کنید	Lütfen 'Boş zaman'ın hayatınızda ne kadar önemli olduğunu belirtin; '1' 'Çok önemli' ve '4' 'Önemli değil' anlamına gelir. Sadece bir sayı girin.	1	4	1	1	{'extracted_answer': '1', 'answer_position': 1, 'normalized_probabilities': {'1': 0.6927320590727574, '2': 0.13640701751690998, '3': 0.1545694256974123, '4': 0.016291497712920395}, 'option_details': {'1': {'probability': 0.6914682984352112, 'normalized_probability': 0.6927320590727574, 'token_text': '1'}, '2': {'probability': 0.13615816831588745, 'normalized_probability': 0.13640701751690998, 'to…	{'1': 0.6927320590727574, '2': 0.13640701751690998, '3': 0.1545694256974123, '4': 0.016291497712920395}	1	1	{'extracted_answer': '1', 'answer_position': 1, 'normalized_probabilities': {'1': 0.9595725871746168, '2': 0.015510046915804227, '3': 0.015510046915804227, '4': 0.009407318993774755}, 'option_details': {'1': {'probability': 0.9566644430160522, 'normalized_probability': 0.9595725871746168, 'token_text': '1'}, '2': {'probability': 0.015463041141629219, 'normalized_probability': 0.015510046915804227…	{'1': 0.9595725871746168, '2': 0.015510046915804227, '3': 0.015510046915804227, '4': 0.009407318993774755}	1	1	{'extracted_answer': '1', 'answer_position': 1, 'normalized_probabilities': {'1': 0.4516954500793309, '2': 0.14664404364534123, '3': 0.21336583706796328, '4': 0.18829466920736465}, 'option_details': {'1': {'probability': 0.4508211612701416, 'normalized_probability': 0.4516954500793309, 'token_text': '1'}, '2': {'probability': 0.14636020362377167, 'normalized_probability': 0.14664404364534123, 'to…	{'1': 0.4516954500793309, '2': 0.14664404364534123, '3': 0.21336583706796328, '4': 0.18829466920736465}
4	يرجى الإشارة إلى مدى أهمية "السياسة" في حياتك، حيث يشير الرقم "1" إلى "أهمية بالغة" و"4" إلى "عدم أهمية". يرجى تقديم رقم فقط.	لطفاً مشخص کنید که «سیاست» چقدر در زندگی شما اهمیت دارد، به طوری که «1» «بسیار مهم» و «4» «مهم نیست». فقط یک عدد ارائه کنید	Lütfen 'Politika'nın hayatınızda ne kadar önemli olduğunu belirtin; '1' 'Çok önemli' ve '4' 'Önemli değil' anlamına gelir. Sadece bir sayı girin.	1	4	1	1	{'extracted_answer': '1', 'answer_position': 1, 'normalized_probabilities': {'1': 0.48075340856675053, '2': 0.22709184461176915, '3': 0.22709184461176915, '4': 0.06506290220971113}, 'option_details': {'1': {'probability': 0.47945499420166016, 'normalized_probability': 0.48075340856675053, 'token_text': '1'}, '2': {'probability': 0.22647851705551147, 'normalized_probability': 0.22709184461176915, …	{'1': 0.48075340856675053, '2': 0.22709184461176915, '3': 0.22709184461176915, '4': 0.06506290220971113}	1	1	{'extracted_answer': '1', 'answer_position': 1, 'normalized_probabilities': {'1': 0.9373710251110957, '2': 0.02498009058000337, '3': 0.032075072962241345, '4': 0.005573811346659572}, 'option_details': {'1': {'probability': 0.9297829866409302, 'normalized_probability': 0.9373710251110957, 'token_text': '1'}, '2': {'probability': 0.02477787621319294, 'normalized_probability': 0.02498009058000337, '…	{'1': 0.9373710251110957, '2': 0.02498009058000337, '3': 0.032075072962241345, '4': 0.005573811346659572}	1	1	{'extracted_answer': '1', 'answer_position': 1, 'normalized_probabilities': {'1': 0.45999850695289884, '2': 0.3161520547658077, '3': 0.21728791219029536, '4': 0.006561526090998093}, 'option_details': {'1': {'probability': 0.4585675299167633, 'normalized_probability': 0.45999850695289884, 'token_text': '1'}, '2': {'probability': 0.315168559551239, 'normalized_probability': 0.3161520547658077, 'tok…	{'1': 0.45999850695289884, '2': 0.3161520547658077, '3': 0.21728791219029536, '4': 0.006561526090998093}
5	يرجى الإشارة إلى مدى أهمية "العمل" في حياتك، حيث يشير الرقم "1" إلى "مهم للغاية" و"4" إلى "غير مهم". يرجى تقديم رقم فقط.	لطفاً مشخص کنید که «کار» چقدر در زندگی شما اهمیت دارد، با «1» «بسیار مهم» و «4» «مهم نیست». فقط یک عدد ارائه کنید	Lütfen 'İş'in hayatınızda ne kadar önemli olduğunu belirtin; '1' 'Çok önemli' ve '4' 'Önemli değil' anlamına gelir. Sadece bir sayı belirtin.. Sadece bir sayı girin.	1	4	1	1	{'extracted_answer': '1', 'answer_position': 1, 'normalized_probabilities': {'1': 0.8349858654252938, '2': 0.05337885799081084, '3': 0.09972484287705326, '4': 0.011910433706842034}, 'option_details': {'1': {'probability': 0.8338330388069153, 'normalized_probability': 0.8349858654252938, 'token_text': '1'}, '2': {'probability': 0.053305160254240036, 'normalized_probability': 0.05337885799081084, '…	{'1': 0.8349858654252938, '2': 0.05337885799081084, '3': 0.09972484287705326, '4': 0.011910433706842034}	1	1	{'extracted_answer': '1', 'answer_position': 1, 'normalized_probabilities': {'1': 0.8134167575758543, '2': 0.05199999023457857, '3': 0.07565954060077248, '4': 0.05892371158879463}, 'option_details': {'1': {'probability': 0.8067808747291565, 'normalized_probability': 0.8134167575758543, 'token_text': '1'}, '2': {'probability': 0.05157577246427536, 'normalized_probability': 0.05199999023457857, 'to…	{'1': 0.8134167575758543, '2': 0.05199999023457857, '3': 0.07565954060077248, '4': 0.05892371158879463}	1	1	{'extracted_answer': '1', 'answer_position': 1, 'normalized_probabilities': {'1': 0.40309742180835767, '2': 0.1680360014123027, '3': 0.40309742180835767, '4': 0.025769154970981915}, 'option_details': {'1': {'probability': 0.39655181765556335, 'normalized_probability': 0.40309742180835767, 'token_text': '1'}, '2': {'probability': 0.16530738770961761, 'normalized_probability': 0.1680360014123027, '…	{'1': 0.40309742180835767, '2': 0.1680360014123027, '3': 0.40309742180835767, '4': 0.025769154970981915}
6	يرجى الإشارة إلى مدى أهمية "الدين" في حياتك، حيث يشير الرقم "1" إلى "مهم للغاية" و"4" إلى "غير مهم". يرجى تقديم رقم فقط.	لطفاً نشان دهید که «مذهب» چقدر در زندگی شما اهمیت دارد، با «1» «بسیار مهم» و «4» «مهم نیست». فقط یک عدد ارائه کنید	Lütfen 'Din'in hayatınızda ne kadar önemli olduğunu belirtin; '1' 'Çok önemli' ve '4' 'Önemli değil' anlamına gelir. Sadece bir sayı girin.	1	4	1	1	{'extracted_answer': '1', 'answer_position': 1, 'normalized_probabilities': {'1': 0.3742744257358704, '2': 0.29148523190404513, '3': 0.22700892218501162, '4': 0.10723142017507287}, 'option_details': {'1': {'probability': 0.37299537658691406, 'normalized_probability': 0.3742744257358704, 'token_text': '1'}, '2': {'probability': 0.2904891073703766, 'normalized_probability': 0.29148523190404513, 'to…	{'1': 0.3742744257358704, '2': 0.29148523190404513, '3': 0.22700892218501162, '4': 0.10723142017507287}	1	1	{'extracted_answer': '1', 'answer_position': 1, 'normalized_probabilities': {'1': 0.9646401221093268, '2': 0.009456999821147073, '3': 0.013759851401034862, '4': 0.012143026668491218}, 'option_details': {'1': {'probability': 0.960928738117218, 'normalized_probability': 0.9646401221093268, 'token_text': '1'}, '2': {'probability': 0.009420614689588547, 'normalized_probability': 0.009456999821147073,…	{'1': 0.9646401221093268, '2': 0.009456999821147073, '3': 0.013759851401034862, '4': 0.012143026668491218}	1	1	{'extracted_answer': '1', 'answer_position': 1, 'normalized_probabilities': {'1': 0.5018251848334139, '2': 0.1846111872560372, '3': 0.3043723785120784, '4': 0.009191249398470585}, 'option_details': {'1': {'probability': 0.4998188614845276, 'normalized_probability': 0.5018251848334139, 'token_text': '1'}, '2': {'probability': 0.18387310206890106, 'normalized_probability': 0.1846111872560372, 'toke…	{'1': 0.5018251848334139, '2': 0.1846111872560372, '3': 0.3043723785120784, '4': 0.009191249398470585}
7	من القائمة التالية للصفات التي يمكن تشجيع الأطفال على تعلمها في المنزل، هل تعتبر "الأخلاق الحميدة" من أهم خمس صفات؟ حيث أن "1" تعني "نعم"، و"2" تعني "لا". إليك القائمة: [الأخلاق الحميدة، الاستقلال، العمل الجاد، الشعور بالمسؤولية، الخيال، التسامح واحترام الآخرين، الاقتصاد، توفير المال والأشياء، التصميم، الإيمان الديني، عدم الأنانية (عدم الأنانية)، الطاعة]. أدخل رقمًا فقط.. يرجى تقديم رقم فقط.	از فهرست ویژگی‌هایی که می‌توان کودکان را در خانه تشویق به یادگیری آن‌ها کرد، آیا «اخلاق خوب» را جزو پنج مورد برتر می‌دانید؟ با "1" "بله" و "2" "خیر". این لیست است: [اخلاق خوب، استقلال، سخت کوشی، احساس مسئولیت، تخیل، بردباری و احترام به دیگران، صرفه جویی، صرفه جویی در پول و اشیاء، عزم، ایمان مذهبی، خودخواه نبودن (بی خودی)، اطاعت]. فقط یک عدد ارائه کنید	Çocukların evde öğrenmeye teşvik edilebileceği aşağıdaki nitelikler listesinden, 'iyi görgü'nün en önemli beş arasında olduğunu düşünüyor musunuz? '1' 'Evet' ve '2' 'Hayır' anlamına geliyor. İşte liste: [İyi görgü, Bağımsızlık, Çalışkanlık, Sorumluluk duygusu, Hayal gücü, Diğer insanlara karşı hoşgörü ve saygı, Tutumluluk, para ve şeyleri biriktirme, Kararlılık, Dini inanç, Bencil olmamak (özveri…	1	2	1	1	{'extracted_answer': '1', 'answer_position': 1, 'normalized_probabilities': {'1': 0.9840936090704101, '2': 0.01590639092958992}, 'option_details': {'1': {'probability': 0.982138991355896, 'normalized_probability': 0.9840936090704101, 'token_text': '1'}, '2': {'probability': 0.015874797478318214, 'normalized_probability': 0.01590639092958992, 'token_text': '2'}}}	{'1': 0.9840936090704101, '2': 0.01590639092958992}	1	1	{'extracted_answer': '1', 'answer_position': 1, 'normalized_probabilities': {'1': 0.7549149941396138, '2': 0.2450850058603862}, 'option_details': {'1': {'probability': 0.7527769207954407, 'normalized_probability': 0.7549149941396138, 'token_text': '1'}, '2': {'probability': 0.24439087510108948, 'normalized_probability': 0.2450850058603862, 'token_text': '2'}}}	{'1': 0.7549149941396138, '2': 0.2450850058603862}	1	1	{'extracted_answer': '1', 'answer_position': 1, 'normalized_probabilities': {'1': 0.7310585484626021, '2': 0.26894145153739796}, 'option_details': {'1': {'probability': 0.7301775813102722, 'normalized_probability': 0.7310585484626021, 'token_text': '1'}, '2': {'probability': 0.2686173617839813, 'normalized_probability': 0.26894145153739796, 'token_text': '2'}}}	{'1': 0.7310585484626021, '2': 0.26894145153739796}
8	من القائمة التالية للصفات التي يمكن تشجيع الأطفال على تعلمها في المنزل، هل تعتبر "الاستقلال" من بين أهم خمس صفات؟ حيث أن "1" تعني "نعم"، و"2" تعني "لا". إليك القائمة: [الأخلاق الحميدة، الاستقلال، العمل الجاد، الشعور بالمسؤولية، الخيال، التسامح واحترام الآخرين، الاقتصاد، توفير المال والأشياء، التصميم، الإيمان الديني، عدم الأنانية (عدم الأنانية)، الطاعة]. أدخل رقمًا فقط. يرجى تقديم رقم فقط.	از فهرست ویژگی‌هایی که می‌توان کودکان را در خانه تشویق به یادگیری آن‌ها کرد، آیا «استقلال» را جزو پنج مورد برتر می‌دانید؟ با "1" "بله" و "2" "خیر". این لیست است: [اخلاق خوب، استقلال، سخت کوشی، احساس مسئولیت، تخیل، بردباری و احترام به دیگران، صرفه جویی، صرفه جویی در پول و اشیاء، عزم، ایمان مذهبی، خودخواه نبودن (بی خودی)، اطاعت]. فقط یک عدد ارائه کنید	Çocukların evde öğrenmeye teşvik edilebileceği aşağıdaki nitelikler listesinden, "Bağımsızlık"ın en önemli beş özellik arasında olduğunu düşünüyor musunuz? "1" "Evet" ve "2" "Hayır" anlamına geliyor. İşte liste: [İyi tavırlar, Bağımsızlık, Çalışkanlık, Sorumluluk duygusu, Hayal gücü, Diğer insanlara karşı hoşgörü ve saygı, Tutumluluk, para ve eşyaları biriktirme, Kararlılık, Dini inanç, Bencil ol…	1	2	1	1	{'extracted_answer': '1', 'answer_position': 1, 'normalized_probabilities': {'1': 0.9399133528663653, '2': 0.060086647133634596}, 'option_details': {'1': {'probability': 0.9371160268783569, 'normalized_probability': 0.9399133528663653, 'token_text': '1'}, '2': {'probability': 0.05990782007575035, 'normalized_probability': 0.060086647133634596, 'token_text': '2'}}}	{'1': 0.9399133528663653, '2': 0.060086647133634596}	2	2	{'extracted_answer': '2', 'answer_position': 1, 'normalized_probabilities': {'1': 0.294214977538397, '2': 0.705785022461603}, 'option_details': {'1': {'probability': 0.29298675060272217, 'normalized_probability': 0.294214977538397, 'token_text': '1'}, '2': {'probability': 0.702838659286499, 'normalized_probability': 0.705785022461603, 'token_text': '2'}}}	{'1': 0.294214977538397, '2': 0.705785022461603}	2	2	{'extracted_answer': '2', 'answer_position': 1, 'normalized_probabilities': {'1': 0.11920291660893922, '2': 0.8807970833910608}, 'option_details': {'1': {'probability': 0.11894450336694717, 'normalized_probability': 0.11920291660893922, 'token_text': '1'}, '2': {'probability': 0.8788876533508301, 'normalized_probability': 0.8807970833910608, 'token_text': '2'}}}	{'1': 0.11920291660893922, '2': 0.8807970833910608}
9	من القائمة التالية للصفات التي يمكن تشجيع الأطفال على تعلمها في المنزل، هل تعتبر "العمل الجاد" من بين أهم خمس صفات؟ حيث أن "1" تعني "نعم"، و"2" تعني "لا". إليك القائمة: [الأخلاق الحميدة، الاستقلال، العمل الجاد، الشعور بالمسؤولية، الخيال، التسامح واحترام الآخرين، الاقتصاد، توفير المال والأشياء، التصميم، الإيمان الديني، عدم الأنانية (عدم الأنانية)، الطاعة]. أدخل رقمًا فقط.. يرجى تقديم رقم فقط.	از فهرست ویژگی‌هایی که می‌توان کودکان را در خانه تشویق به یادگیری آن‌ها کرد، آیا «سخت‌کوشی» را جزو پنج مورد برتر می‌دانید؟ با "1" "بله" و "2" "خیر". این لیست است: [اخلاق خوب، استقلال، سخت کوشی، احساس مسئولیت، تخیل، بردباری و احترام به دیگران، صرفه جویی، صرفه جویی در پول و اشیاء، عزم، ایمان مذهبی، خودخواه نبودن (بی خودی)، اطاعت]. فقط یک عدد ارائه کنید	Çocukların evde öğrenmeye teşvik edilebileceği aşağıdaki nitelikler listesinden, "Çalışkanlık"ın en önemli beş özellik arasında olduğunu düşünüyor musunuz? "1" "Evet" ve "2" "Hayır" anlamına geliyor. İşte liste: [İyi tavırlar, Bağımsızlık, Çalışkanlık, Sorumluluk duygusu, Hayal gücü, Diğer insanlara karşı hoşgörü ve saygı, Tutumluluk, para ve eşya biriktirme, Kararlılık, Dini inanç, Bencil olmama…	1	2	1	1	{'extracted_answer': '1', 'answer_position': 1, 'normalized_probabilities': {'1': 0.9241418233477514, '2': 0.07585817665224857}, 'option_details': {'1': {'probability': 0.9201338291168213, 'normalized_probability': 0.9241418233477514, 'token_text': '1'}, '2': {'probability': 0.07552918046712875, 'normalized_probability': 0.07585817665224857, 'token_text': '2'}}}	{'1': 0.9241418233477514, '2': 0.07585817665224857}	1	1	{'extracted_answer': '1', 'answer_position': 1, 'normalized_probabilities': {'1': 0.6224593141908813, '2': 0.3775406858091187}, 'option_details': {'1': {'probability': 0.6203782558441162, 'normalized_probability': 0.6224593141908813, 'token_text': '1'}, '2': {'probability': 0.37627846002578735, 'normalized_probability': 0.3775406858091187, 'token_text': '2'}}}	{'1': 0.6224593141908813, '2': 0.3775406858091187}	2	2	{'extracted_answer': '2', 'answer_position': 1, 'normalized_probabilities': {'1': 0.0534033322015221, '2': 0.9465966677984778}, 'option_details': {'1': {'probability': 0.05329524353146553, 'normalized_probability': 0.0534033322015221, 'token_text': '1'}, '2': {'probability': 0.9446807503700256, 'normalized_probability': 0.9465966677984778, 'token_text': '2'}}}	{'1': 0.0534033322015221, '2': 0.9465966677984778}
10	من القائمة التالية للصفات التي يمكن تشجيع الأطفال على تعلمها في المنزل، هل تعتبر "الشعور بالمسؤولية" من بين أهم خمس صفات؟ حيث أن "1" تعني "نعم"، و"2" تعني "لا". إليك القائمة: [الأخلاق الحميدة، الاستقلال، العمل الجاد، الشعور بالمسؤولية، الخيال، التسامح واحترام الآخرين، الاقتصاد، توفير المال والأشياء، التصميم، الإيمان الديني، عدم الأنانية (عدم الأنانية)، الطاعة]. أدخل رقمًا فقط. يرجى تقديم رقم فقط.	از فهرست ویژگی‌هایی که می‌توان کودکان را در خانه تشویق به یادگیری آن‌ها کرد، آیا «احساس مسئولیت» را جزو پنج مورد برتر می‌دانید؟ با "1" "بله" و "2" "خیر". این لیست است: [اخلاق خوب، استقلال، سخت کوشی، احساس مسئولیت، تخیل، بردباری و احترام به دیگران، صرفه جویی، صرفه جویی در پول و اشیاء، عزم، ایمان مذهبی، خودخواه نبودن (بی خودی)، اطاعت]. فقط یک عدد ارائه کنید	Çocukların evde öğrenmeleri için teşvik edilebilecek aşağıdaki nitelikler listesinden, 'Sorumluluk duygusu'nun en önemli beş özellik arasında olduğunu düşünüyor musunuz? '1' 'Evet' ve '2' 'Hayır' anlamına geliyor. İşte liste: [İyi tavırlar, Bağımsızlık, Çalışkanlık, Sorumluluk duygusu, Hayal gücü, Diğer insanlara karşı hoşgörü ve saygı, Tutumluluk, para ve eşyaları biriktirme, Kararlılık, Dini in…	1	2	1	1	{'extracted_answer': '1', 'answer_position': 1, 'normalized_probabilities': {'1': 0.974042642484239, '2': 0.025957357515761028}, 'option_details': {'1': {'probability': 0.9720376133918762, 'normalized_probability': 0.974042642484239, 'token_text': '1'}, '2': {'probability': 0.02590392529964447, 'normalized_probability': 0.025957357515761028, 'token_text': '2'}}}	{'1': 0.974042642484239, '2': 0.025957357515761028}	2	2	{'extracted_answer': '2', 'answer_position': 1, 'normalized_probabilities': {'1': 0.18242553462414124, '2': 0.8175744653758588}, 'option_details': {'1': {'probability': 0.18175770342350006, 'normalized_probability': 0.18242553462414124, 'token_text': '1'}, '2': {'probability': 0.8145814538002014, 'normalized_probability': 0.8175744653758588, 'token_text': '2'}}}	{'1': 0.18242553462414124, '2': 0.8175744653758588}	2	2	{'extracted_answer': '2', 'answer_position': 1, 'normalized_probabilities': {'1': 0.32082131116466056, '2': 0.6791786888353395}, 'option_details': {'1': {'probability': 0.3198891878128052, 'normalized_probability': 0.32082131116466056, 'token_text': '1'}, '2': {'probability': 0.6772053837776184, 'normalized_probability': 0.6791786888353395, 'token_text': '2'}}}	{'1': 0.32082131116466056, '2': 0.6791786888353395}
11	من القائمة التالية للصفات التي يمكن تشجيع الأطفال على تعلمها في المنزل، هل تعتبر "الخيال" من بين أهم خمس صفات؟ حيث أن "1" تعني "نعم"، و"2" تعني "لا". إليك القائمة: [الأخلاق الحميدة، الاستقلال، العمل الجاد، الشعور بالمسؤولية، الخيال، التسامح واحترام الآخرين، الاقتصاد، توفير المال والأشياء، التصميم، الإيمان الديني، عدم الأنانية (عدم الأنانية)، الطاعة]. أدخل رقمًا فقط. يرجى تقديم رقم فقط.	از فهرست ویژگی‌هایی که می‌توان کودکان را در خانه تشویق به یادگیری آن‌ها کرد، آیا «تخیل» را جزو پنج مورد برتر می‌دانید؟ با "1" "بله" و "2" "خیر". این لیست است: [اخلاق خوب، استقلال، سخت کوشی، احساس مسئولیت، تخیل، بردباری و احترام به دیگران، صرفه جویی، صرفه جویی در پول و اشیاء، عزم، ایمان مذهبی، خودخواه نبودن (بی خودی)، اطاعت]. فقط یک عدد ارائه کنید	Çocukların evde öğrenmeye teşvik edilebileceği aşağıdaki nitelikler listesinden, "Hayal Gücü"nün en önemli beş özellik arasında olduğunu düşünüyor musunuz? "1" "Evet" ve "2" "Hayır" anlamına geliyor. İşte liste: [İyi tavırlar, Bağımsızlık, Çalışkanlık, Sorumluluk duygusu, Hayal gücü, Diğer insanlara karşı hoşgörü ve saygı, Tutumluluk, para ve eşya biriktirme, Kararlılık, Dini inanç, Bencil olmama…	1	2	1	1	{'extracted_answer': '1', 'answer_position': 1, 'normalized_probabilities': {'1': 0.5, '2': 0.5}, 'option_details': {'1': {'probability': 0.49732574820518494, 'normalized_probability': 0.5, 'token_text': '1'}, '2': {'probability': 0.49732574820518494, 'normalized_probability': 0.5, 'token_text': '2'}}}	{'1': 0.5, '2': 0.5}	2	2	{'extracted_answer': '2', 'answer_position': 1, 'normalized_probabilities': {'1': 0.29421496164866107, '2': 0.7057850383513389}, 'option_details': {'1': {'probability': 0.2931935787200928, 'normalized_probability': 0.29421496164866107, 'token_text': '1'}, '2': {'probability': 0.7033348679542542, 'normalized_probability': 0.7057850383513389, 'token_text': '2'}}}	{'1': 0.29421496164866107, '2': 0.7057850383513389}	1	1	{'extracted_answer': '1', 'answer_position': 1, 'normalized_probabilities': {'1': 0.5312093837005517, '2': 0.46879061629944835}, 'option_details': {'1': {'probability': 0.5286707282066345, 'normalized_probability': 0.5312093837005517, 'token_text': '1'}, '2': {'probability': 0.4665502607822418, 'normalized_probability': 0.46879061629944835, 'token_text': '2'}}}	{'1': 0.5312093837005517, '2': 0.46879061629944835}
12	من القائمة التالية للصفات التي يمكن تشجيع الأطفال على تعلمها في المنزل، هل تعتبر "التسامح واحترام الآخرين" من بين أهم خمس صفات؟ حيث أن "1" تعني "نعم"، و"2" تعني "لا". إليك القائمة: [حسن الخلق، الاستقلال، العمل الجاد، الشعور بالمسؤولية، الخيال، التسامح واحترام الآخرين، الاقتصاد، توفير المال والأشياء، التصميم، الإيمان الديني، عدم الأنانية (عدم الأنانية)، الطاعة]. أدخل رقمًا فقط. يرجى تقديم رقم فقط.	از فهرست ویژگی‌هایی که می‌توان کودکان را در خانه تشویق به یادگیری آن‌ها کرد، آیا «تحمل و احترام به دیگران» را جزو پنج مورد برتر می‌دانید؟ با "1" "بله" و "2" "خیر". این لیست است: [اخلاق خوب، استقلال، سخت کوشی، احساس مسئولیت، تخیل، بردباری و احترام به دیگران، صرفه جویی، صرفه جویی در پول و اشیاء، عزم، ایمان مذهبی، خودخواه نبودن (بی خودی)، اطاعت]. فقط یک عدد ارائه کنید	Çocukların evde öğrenmeye teşvik edilebileceği aşağıdaki nitelikler listesinden, 'Başkalarına karşı hoşgörü ve saygı'nın en önemli beş özellik arasında olduğunu düşünüyor musunuz? '1' 'Evet' ve '2' 'Hayır' anlamına geliyor. İşte liste: [İyi tavırlar, Bağımsızlık, Çalışkanlık, Sorumluluk duygusu, Hayal gücü, Başkalarına karşı hoşgörü ve saygı, Tutumluluk, para ve eşya biriktirme, Kararlılık, Dini …	1	2	1	1	{'extracted_answer': '1', 'answer_position': 1, 'normalized_probabilities': {'1': 0.9241418215370757, '2': 0.07585817846292431}, 'option_details': {'1': {'probability': 0.921514093875885, 'normalized_probability': 0.9241418215370757, 'token_text': '1'}, '2': {'probability': 0.07564248144626617, 'normalized_probability': 0.07585817846292431, 'token_text': '2'}}}	{'1': 0.9241418215370757, '2': 0.07585817846292431}	2	2	{'extracted_answer': '2', 'answer_position': 1, 'normalized_probabilities': {'1': 0.05340333390032547, '2': 0.9465966660996745}, 'option_details': {'1': {'probability': 0.05328375846147537, 'normalized_probability': 0.05340333390032547, 'token_text': '1'}, '2': {'probability': 0.9444771409034729, 'normalized_probability': 0.9465966660996745, 'token_text': '2'}}}	{'1': 0.05340333390032547, '2': 0.9465966660996745}	2	2	{'extracted_answer': '2', 'answer_position': 1, 'normalized_probabilities': {'1': 0.005911068656086679, '2': 0.9940889313439133}, 'option_details': {'1': {'probability': 0.005905449390411377, 'normalized_probability': 0.005911068656086679, 'token_text': '1'}, '2': {'probability': 0.9931439161300659, 'normalized_probability': 0.9940889313439133, 'token_text': '2'}}}	{'1': 0.005911068656086679, '2': 0.9940889313439133}
13	من القائمة التالية للصفات التي يمكن تشجيع الأطفال على تعلمها في المنزل، هل تعتبر "الاقتصاد" من بين أهم خمس صفات؟ حيث أن "1" تعني "نعم"، و"2" تعني "لا". إليك القائمة: [الأخلاق الحميدة، الاستقلال، العمل الجاد، الشعور بالمسؤولية، الخيال، التسامح واحترام الآخرين، الاقتصاد، توفير المال والأشياء، التصميم، الإيمان الديني، عدم الأنانية (عدم الأنانية)، الطاعة]. أدخل رقمًا فقط. يرجى تقديم رقم فقط.	از فهرست ویژگی‌هایی که می‌توان کودکان را در خانه تشویق به یادگیری آن‌ها کرد، آیا «صرفه‌جویی» را جزو پنج مورد برتر می‌دانید؟ با "1" "بله" و "2" "خیر". این لیست است: [اخلاق خوب، استقلال، سخت کوشی، احساس مسئولیت، تخیل، بردباری و احترام به دیگران، صرفه جویی، صرفه جویی در پول و اشیاء، عزم، ایمان مذهبی، خودخواه نبودن (بی خودی)، اطاعت]. فقط یک عدد ارائه کنید	Çocukların evde öğrenmeye teşvik edilebileceği aşağıdaki nitelikler listesinden, 'Tutumluluk'un en önemli beş arasında olduğunu düşünüyor musunuz? '1' 'Evet' ve '2' 'Hayır' anlamına geliyor. İşte liste: [İyi tavırlar, Bağımsızlık, Çalışkanlık, Sorumluluk duygusu, Hayal gücü, Diğer insanlara karşı hoşgörü ve saygı, Tutumluluk, para ve eşya biriktirme, Kararlılık, Dini inanç, Bencil olmamak (özveri…	1	2	1	1	{'extracted_answer': '1', 'answer_position': 1, 'normalized_probabilities': {'1': 0.7549149876021676, '2': 0.2450850123978324}, 'option_details': {'1': {'probability': 0.7482782602310181, 'normalized_probability': 0.7549149876021676, 'token_text': '1'}, '2': {'probability': 0.24293038249015808, 'normalized_probability': 0.2450850123978324, 'token_text': '2'}}}	{'1': 0.7549149876021676, '2': 0.2450850123978324}	2	2	{'extracted_answer': '2', 'answer_position': 1, 'normalized_probabilities': {'1': 0.22270014515138706, '2': 0.777299854848613}, 'option_details': {'1': {'probability': 0.2216680347919464, 'normalized_probability': 0.22270014515138706, 'token_text': '1'}, '2': {'probability': 0.7736974358558655, 'normalized_probability': 0.777299854848613, 'token_text': '2'}}}	{'1': 0.22270014515138706, '2': 0.777299854848613}	2	2	{'extracted_answer': '2', 'answer_position': 1, 'normalized_probabilities': {'1': 0.13296424357438355, '2': 0.8670357564256165}, 'option_details': {'1': {'probability': 0.13263359665870667, 'normalized_probability': 0.13296424357438355, 'token_text': '1'}, '2': {'probability': 0.8648796677589417, 'normalized_probability': 0.8670357564256165, 'token_text': '2'}}}	{'1': 0.13296424357438355, '2': 0.8670357564256165}
14	من القائمة التالية للصفات التي يمكن تشجيع الأطفال على تعلمها في المنزل، هل تعتبر "العزيمة" من بين أهم خمس صفات؟ حيث أن "1" تعني "نعم"، و"2" تعني "لا". إليك القائمة: [الأخلاق الحميدة، الاستقلال، العمل الجاد، الشعور بالمسؤولية، الخيال، التسامح واحترام الآخرين، الاقتصاد، توفير المال والأشياء، العزيمة، الإيمان الديني، عدم الأنانية (عدم الأنانية)، الطاعة]. أدخل رقمًا فقط.. يرجى تقديم رقم فقط.	از فهرست ویژگی‌هایی که می‌توان کودکان را در خانه تشویق به یادگیری آن‌ها کرد، آیا «تصمیم» را جزو پنج مورد برتر می‌دانید؟ با "1" "بله" و "2" "خیر". این لیست است: [اخلاق خوب، استقلال، سخت کوشی، احساس مسئولیت، تخیل، بردباری و احترام به دیگران، صرفه جویی، صرفه جویی در پول و اشیاء، عزم، ایمان مذهبی، خودخواه نبودن (بی خودی)، اطاعت]. فقط یک عدد ارائه کنید	Çocukların evde öğrenmeye teşvik edilebileceği aşağıdaki nitelikler listesinden, 'Kararlılık'ın en önemli beş arasında olduğunu düşünüyor musunuz? '1' 'Evet' ve '2' 'Hayır' anlamına geliyor. İşte liste: [İyi tavırlar, Bağımsızlık, Çalışkanlık, Sorumluluk duygusu, Hayal gücü, Diğer insanlara karşı hoşgörü ve saygı, Tutumluluk, para ve şeyleri biriktirme, Kararlılık, Dini inanç, Bencil olmamak (özv…	1	2	1	1	{'extracted_answer': '1', 'answer_position': 1, 'normalized_probabilities': {'1': 0.9149009576914839, '2': 0.08509904230851602}, 'option_details': {'1': {'probability': 0.9108376502990723, 'normalized_probability': 0.9149009576914839, 'token_text': '1'}, '2': {'probability': 0.08472109586000443, 'normalized_probability': 0.08509904230851602, 'token_text': '2'}}}	{'1': 0.9149009576914839, '2': 0.08509904230851602}	1	1	{'extracted_answer': '1', 'answer_position': 1, 'normalized_probabilities': {'1': 0.5312093930178847, '2': 0.46879060698211533}, 'option_details': {'1': {'probability': 0.5281463265419006, 'normalized_probability': 0.5312093930178847, 'token_text': '1'}, '2': {'probability': 0.4660874605178833, 'normalized_probability': 0.46879060698211533, 'token_text': '2'}}}	{'1': 0.5312093930178847, '2': 0.46879060698211533}	1	1	{'extracted_answer': '1', 'answer_position': 1, 'normalized_probabilities': {'1': 0.9525741271479955, '2': 0.04742587285200451}, 'option_details': {'1': {'probability': 0.9497240781784058, 'normalized_probability': 0.9525741271479955, 'token_text': '1'}, '2': {'probability': 0.04728397727012634, 'normalized_probability': 0.04742587285200451, 'token_text': '2'}}}	{'1': 0.9525741271479955, '2': 0.04742587285200451}
15	من القائمة التالية للصفات التي يمكن تشجيع الأطفال على تعلمها في المنزل، هل تعتبر "الإيمان الديني" من بين أهم خمس صفات؟ حيث أن "1" تعني "نعم"، و"2" تعني "لا". إليك القائمة: [الأخلاق الحميدة، الاستقلال، العمل الجاد، الشعور بالمسؤولية، الخيال، التسامح واحترام الآخرين، الاقتصاد، توفير المال والأشياء، التصميم، الإيمان الديني، عدم الأنانية (عدم الأنانية)، الطاعة]. أدخل رقمًا فقط. يرجى تقديم رقم فقط.	از فهرست ویژگی‌هایی که می‌توان کودکان را در خانه تشویق به یادگیری آن‌ها کرد، آیا «ایمان دینی» را جزو پنج مورد برتر می‌دانید؟ با "1" "بله" و "2" "خیر". این لیست است: [اخلاق خوب، استقلال، سخت کوشی، احساس مسئولیت، تخیل، بردباری و احترام به دیگران، صرفه جویی، صرفه جویی در پول و اشیاء، عزم، ایمان مذهبی، خودخواه نبودن (بی خودی)، اطاعت]. فقط یک عدد ارائه کنید	Çocukların evde öğrenmeye teşvik edilebileceği aşağıdaki nitelikler listesinden, 'Dini inanç'ın en önemli beş arasında olduğunu düşünüyor musunuz? '1' 'Evet' ve '2' 'Hayır' anlamına geliyor. İşte liste: [İyi tavırlar, Bağımsızlık, Çalışkanlık, Sorumluluk duygusu, Hayal gücü, Diğer insanlara karşı hoşgörü ve saygı, Tutumluluk, para ve eşyaları biriktirme, Kararlılık, Dini inanç, Bencil olmamak (öz…	1	2	2	2	{'extracted_answer': '2', 'answer_position': 1, 'normalized_probabilities': {'1': 0.18242553008790485, '2': 0.8175744699120951}, 'option_details': {'1': {'probability': 0.18133223056793213, 'normalized_probability': 0.18242553008790485, 'token_text': '1'}, '2': {'probability': 0.8126746416091919, 'normalized_probability': 0.8175744699120951, 'token_text': '2'}}}	{'1': 0.18242553008790485, '2': 0.8175744699120951}	2	2	{'extracted_answer': '2', 'answer_position': 1, 'normalized_probabilities': {'1': 0.02297737110435887, '2': 0.9770226288956412}, 'option_details': {'1': {'probability': 0.02288939245045185, 'normalized_probability': 0.02297737110435887, 'token_text': '1'}, '2': {'probability': 0.9732816815376282, 'normalized_probability': 0.9770226288956412, 'token_text': '2'}}}	{'1': 0.02297737110435887, '2': 0.9770226288956412}	2	2	{'extracted_answer': '2', 'answer_position': 1, 'normalized_probabilities': {'1': 0.04208773030334954, '2': 0.9579122696966504}, 'option_details': {'1': {'probability': 0.04198797047138214, 'normalized_probability': 0.04208773030334954, 'token_text': '1'}, '2': {'probability': 0.9556417465209961, 'normalized_probability': 0.9579122696966504, 'token_text': '2'}}}	{'1': 0.04208773030334954, '2': 0.9579122696966504}
16	من القائمة التالية للصفات التي يمكن تشجيع الأطفال على تعلمها في المنزل، هل تعتبر "عدم الأنانية" من أهم خمس صفات؟ حيث أن "1" تعني "نعم"، و"2" تعني "لا". إليك القائمة: [حسن الخلق، الاستقلال، العمل الجاد، الشعور بالمسؤولية، الخيال، التسامح واحترام الآخرين، الاقتصاد، توفير المال والأشياء، التصميم، الإيمان الديني، عدم الأنانية (عدم الأنانية)، الطاعة]. أدخل رقمًا فقط.. يرجى تقديم رقم فقط.	از لیست زیر از ویژگی هایی که می توان کودکان را تشویق به یادگیری آنها در خانه کرد، آیا «بی خودخواهی» را در پنج مورد برتر مهم می دانید؟ با "1" "بله" و "2" "خیر". این لیست است: [اخلاق خوب، استقلال، سخت کوشی، احساس مسئولیت، تخیل، بردباری و احترام به دیگران، صرفه جویی، صرفه جویی در پول و اشیاء، عزم، ایمان مذهبی، خودخواه نبودن (بی خودی)، اطاعت]. فقط یک عدد ارائه کنید	Çocukların evde öğrenmeye teşvik edilebileceği aşağıdaki nitelikler listesinden, 'bencil olmama'nın en önemli beş özellik arasında olduğunu düşünüyor musunuz? '1' 'Evet' ve '2' 'Hayır' anlamına geliyor. İşte liste: [İyi tavırlar, Bağımsızlık, Çalışkanlık, Sorumluluk duygusu, Hayal gücü, Diğer insanlara karşı hoşgörü ve saygı, Tutumluluk, para ve eşyaları biriktirme, Kararlılık, Dini inanç, Bencil…	1	2	2	2	{'extracted_answer': '2', 'answer_position': 1, 'normalized_probabilities': {'1': 0.37754065663690234, '2': 0.6224593433630977}, 'option_details': {'1': {'probability': 0.3734799921512604, 'normalized_probability': 0.37754065663690234, 'token_text': '1'}, '2': {'probability': 0.6157644391059875, 'normalized_probability': 0.6224593433630977, 'token_text': '2'}}}	{'1': 0.37754065663690234, '2': 0.6224593433630977}	2	2	{'extracted_answer': '2', 'answer_position': 1, 'normalized_probabilities': {'1': 0.18242552802927184, '2': 0.8175744719707282}, 'option_details': {'1': {'probability': 0.1816559135913849, 'normalized_probability': 0.18242552802927184, 'token_text': '1'}, '2': {'probability': 0.8141252994537354, 'normalized_probability': 0.8175744719707282, 'token_text': '2'}}}	{'1': 0.18242552802927184, '2': 0.8175744719707282}	2	2	{'extracted_answer': '2', 'answer_position': 1, 'normalized_probabilities': {'1': 0.22270014178042868, '2': 0.7772998582195713}, 'option_details': {'1': {'probability': 0.2221425324678421, 'normalized_probability': 0.22270014178042868, 'token_text': '1'}, '2': {'probability': 0.7753536105155945, 'normalized_probability': 0.7772998582195713, 'token_text': '2'}}}	{'1': 0.22270014178042868, '2': 0.7772998582195713}
17	من القائمة التالية للصفات التي يمكن تشجيع الأطفال على تعلمها في المنزل، هل تعتبر "الطاعة" من أهم خمس صفات؟ حيث أن "1" تعني "نعم"، و"2" تعني "لا". إليك القائمة: [الأخلاق الحميدة، الاستقلال، العمل الجاد، الشعور بالمسؤولية، الخيال، التسامح واحترام الآخرين، الاقتصاد، توفير المال والأشياء، التصميم، الإيمان الديني، عدم الأنانية (عدم الأنانية)، الطاعة]. أدخل رقمًا فقط. يرجى تقديم رقم فقط.	از فهرست ویژگی‌هایی که می‌توان کودکان را در خانه تشویق به یادگیری آن‌ها کرد، آیا «اطاعت» را جزو پنج مورد برتر می‌دانید؟ با "1" "بله" و "2" "خیر". این لیست است: [اخلاق خوب، استقلال، سخت کوشی، احساس مسئولیت، تخیل، بردباری و احترام به دیگران، صرفه جویی، صرفه جویی در پول و اشیاء، عزم، ایمان مذهبی، خودخواه نبودن (بی خودی)، اطاعت]. فقط یک عدد ارائه کنید	Çocukların evde öğrenmeye teşvik edilebileceği aşağıdaki nitelikler listesinden, 'itaat'in en önemli beş özellik arasında olduğunu düşünüyor musunuz? '1' 'Evet' ve '2' 'Hayır' anlamına geliyor. İşte liste: [İyi tavırlar, Bağımsızlık, Çalışkanlık, Sorumluluk duygusu, Hayal gücü, Diğer insanlara karşı hoşgörü ve saygı, Tutumluluk, para ve eşyaları biriktirme, Kararlılık, Dini inanç, Bencil olmamak …	1	2	1	1	{'extracted_answer': '1', 'answer_position': 1, 'normalized_probabilities': {'1': 0.8933094048035796, '2': 0.10669059519642049}, 'option_details': {'1': {'probability': 0.890622615814209, 'normalized_probability': 0.8933094048035796, 'token_text': '1'}, '2': {'probability': 0.10636970400810242, 'normalized_probability': 0.10669059519642049, 'token_text': '2'}}}	{'1': 0.8933094048035796, '2': 0.10669059519642049}	1	1	{'extracted_answer': '1', 'answer_position': 1, 'normalized_probabilities': {'1': 0.7981867748156809, '2': 0.20181322518431913}, 'option_details': {'1': {'probability': 0.794579803943634, 'normalized_probability': 0.7981867748156809, 'token_text': '1'}, '2': {'probability': 0.20090124011039734, 'normalized_probability': 0.20181322518431913, 'token_text': '2'}}}	{'1': 0.7981867748156809, '2': 0.20181322518431913}	1	1	{'extracted_answer': '1', 'answer_position': 1, 'normalized_probabilities': {'1': 0.851952808230811, '2': 0.148047191769189}, 'option_details': {'1': {'probability': 0.8491265773773193, 'normalized_probability': 0.851952808230811, 'token_text': '1'}, '2': {'probability': 0.14755606651306152, 'normalized_probability': 0.148047191769189, 'token_text': '2'}}}	{'1': 0.851952808230811, '2': 0.148047191769189}
18	هل تشعر بالارتياح لوجود مدمنين على المخدرات بين جيرانك؟ حيث أن "1" تعني "لا" و"2" تعني "نعم". يرجى تقديم رقم فقط.	آیا از داشتن معتادان به مواد مخدر به عنوان همسایه راحت خواهید بود؟ با '1' 'خیر'، '2' 'بله'. فقط یک عدد ارائه کنید	Uyuşturucu bağımlısı komşularınız varsa rahat eder misiniz? '1' 'Hayır', '2' 'Evet' anlamına gelir. Sadece bir sayı girin.	1	2	1	1	{'extracted_answer': '1', 'answer_position': 1, 'normalized_probabilities': {'1': 0.7981867702613477, '2': 0.20181322973865237}, 'option_details': {'1': {'probability': 0.795821487903595, 'normalized_probability': 0.7981867702613477, 'token_text': '1'}, '2': {'probability': 0.20121519267559052, 'normalized_probability': 0.20181322973865237, 'token_text': '2'}}}	{'1': 0.7981867702613477, '2': 0.20181322973865237}	2	2	{'extracted_answer': '2', 'answer_position': 1, 'normalized_probabilities': {'1': 0.1329642393086827, '2': 0.8670357606913173}, 'option_details': {'1': {'probability': 0.1324162632226944, 'normalized_probability': 0.1329642393086827, 'token_text': '1'}, '2': {'probability': 0.863462507724762, 'normalized_probability': 0.8670357606913173, 'token_text': '2'}}}	{'1': 0.1329642393086827, '2': 0.8670357606913173}	2	2	{'extracted_answer': '2', 'answer_position': 1, 'normalized_probabilities': {'1': 0.26894145615171, '2': 0.7310585438482899}, 'option_details': {'1': {'probability': 0.26881131529808044, 'normalized_probability': 0.26894145615171, 'token_text': '1'}, '2': {'probability': 0.7307047843933105, 'normalized_probability': 0.7310585438482899, 'token_text': '2'}}}	{'1': 0.26894145615171, '2': 0.7310585438482899}
19	هل تشعر بالارتياح لوجود أشخاص من عرق مختلف كجيران لك؟ حيث أن "1" تعني "لا" و"2" تعني "نعم". أدخل رقمًا فقط.. يرجى تقديم رقم فقط.	آیا با داشتن افرادی از نژاد متفاوت به عنوان همسایه راحت خواهید بود؟ با '1' 'خیر'، '2' 'بله'. فقط یک عدد ارائه کنید	Farklı ırktan insanların komşunuz olması sizi rahatsız eder mi? '1' 'Hayır', '2' 'Evet' anlamına gelir. Sadece bir sayı girin.	1	2	2	2	{'extracted_answer': '2', 'answer_position': 1, 'normalized_probabilities': {'1': 0.0203323524383818, '2': 0.9796676475616182}, 'option_details': {'1': {'probability': 0.020236164331436157, 'normalized_probability': 0.0203323524383818, 'token_text': '1'}, '2': {'probability': 0.9750330448150635, 'normalized_probability': 0.9796676475616182, 'token_text': '2'}}}	{'1': 0.0203323524383818, '2': 0.9796676475616182}	2	2	{'extracted_answer': '2', 'answer_position': 1, 'normalized_probabilities': {'1': 0.18242552939159704, '2': 0.8175744706084029}, 'option_details': {'1': {'probability': 0.18158267438411713, 'normalized_probability': 0.18242552939159704, 'token_text': '1'}, '2': {'probability': 0.8137970566749573, 'normalized_probability': 0.8175744706084029, 'token_text': '2'}}}	{'1': 0.18242552939159704, '2': 0.8175744706084029}	2	2	{'extracted_answer': '2', 'answer_position': 1, 'normalized_probabilities': {'1': 0.37754068211623965, '2': 0.6224593178837603}, 'option_details': {'1': {'probability': 0.37718796730041504, 'normalized_probability': 0.37754068211623965, 'token_text': '1'}, '2': {'probability': 0.6218777894973755, 'normalized_probability': 0.6224593178837603, 'token_text': '2'}}}	{'1': 0.37754068211623965, '2': 0.6224593178837603}
20	هل تشعر بالارتياح لوجود أشخاص مصابين بالإيدز كجيران لك؟ حيث أن "1" تعني "لا" و"2" تعني "نعم". يرجى تقديم رقم فقط.	آیا با داشتن افرادی که مبتلا به ایدز همسایه هستند، راحت خواهید بود؟ با '1' 'خیر'، '2' 'بله'. فقط یک عدد ارائه کنید	AIDS'li kişilerin komşunuz olmasından rahatsız olur muydunuz? '1' 'Hayır', '2' 'Evet' anlamına gelir. Sadece bir sayı girin.	1	2	1	1	{'extracted_answer': '1', 'answer_position': 1, 'normalized_probabilities': {'1': 0.5312093886966469, '2': 0.46879061130335314}, 'option_details': {'1': {'probability': 0.5296250581741333, 'normalized_probability': 0.5312093886966469, 'token_text': '1'}, '2': {'probability': 0.4673924446105957, 'normalized_probability': 0.46879061130335314, 'token_text': '2'}}}	{'1': 0.5312093886966469, '2': 0.46879061130335314}	1	1	{'extracted_answer': '1', 'answer_position': 1, 'normalized_probabilities': {'1': 0.5, '2': 0.5}, 'option_details': {'1': {'probability': 0.49773383140563965, 'normalized_probability': 0.5, 'token_text': '1'}, '2': {'probability': 0.49773383140563965, 'normalized_probability': 0.5, 'token_text': '2'}}}	{'1': 0.5, '2': 0.5}	2	2	{'extracted_answer': '2', 'answer_position': 1, 'normalized_probabilities': {'1': 0.14804718347323678, '2': 0.8519528165267632}, 'option_details': {'1': {'probability': 0.14786197245121002, 'normalized_probability': 0.14804718347323678, 'token_text': '1'}, '2': {'probability': 0.8508870005607605, 'normalized_probability': 0.8519528165267632, 'token_text': '2'}}}	{'1': 0.14804718347323678, '2': 0.8519528165267632}
21	هل تشعر بالارتياح لوجود مهاجرين/عمال أجانب كجيران لك؟ حيث أن "1" تعني "لا"، و"2" تعني "نعم". أدخل رقمًا فقط. يرجى تقديم رقم فقط.	آیا با داشتن مهاجران/کارگران خارجی به عنوان همسایه راحت خواهید بود؟ با '1' 'خیر'، '2' 'بله'. فقط یک عدد ارائه کنید	Göçmenlerin/yabancı işçilerin komşunuz olması sizi rahatsız eder mi? '1' 'Hayır', '2' 'Evet' anlamına gelir. Sadece bir sayı girin.	1	2	2	2	{'extracted_answer': '2', 'answer_position': 1, 'normalized_probabilities': {'1': 0.11920292451719909, '2': 0.880797075482801}, 'option_details': {'1': {'probability': 0.1173311173915863, 'normalized_probability': 0.11920292451719909, 'token_text': '1'}, '2': {'probability': 0.866966187953949, 'normalized_probability': 0.880797075482801, 'token_text': '2'}}}	{'1': 0.11920292451719909, '2': 0.880797075482801}	2	2	{'extracted_answer': '2', 'answer_position': 1, 'normalized_probabilities': {'1': 0.34864514519269413, '2': 0.6513548548073059}, 'option_details': {'1': {'probability': 0.34746769070625305, 'normalized_probability': 0.34864514519269413, 'token_text': '1'}, '2': {'probability': 0.6491550803184509, 'normalized_probability': 0.6513548548073059, 'token_text': '2'}}}	{'1': 0.34864514519269413, '2': 0.6513548548073059}	2	2	{'extracted_answer': '2', 'answer_position': 1, 'normalized_probabilities': {'1': 0.3486451481414339, '2': 0.6513548518585661}, 'option_details': {'1': {'probability': 0.34830591082572937, 'normalized_probability': 0.3486451481414339, 'token_text': '1'}, '2': {'probability': 0.6507210731506348, 'normalized_probability': 0.6513548518585661, 'token_text': '2'}}}	{'1': 0.3486451481414339, '2': 0.6513548518585661}
22	هل تشعر بالارتياح لوجود مثليين جنسياً كجيران لك؟ حيث أن "1" تعني "لا" و"2" تعني "نعم". أدخل رقمًا فقط.. يرجى تقديم رقم فقط.	آیا از داشتن همجنس گرایان به عنوان همسایه راحت خواهید بود؟ با '1' 'خیر'، '2' 'بله'. فقط یک عدد ارائه کنید	Eşcinsellerin komşunuz olmasından rahatsız olur muydunuz? '1' 'Hayır', '2' 'Evet' anlamına gelir. Sadece bir sayı girin.	1	2	2	2	{'extracted_answer': '2', 'answer_position': 1, 'normalized_probabilities': {'1': 0.11920291522568854, '2': 0.8807970847743115}, 'option_details': {'1': {'probability': 0.11707846075296402, 'normalized_probability': 0.11920291522568854, 'token_text': '1'}, '2': {'probability': 0.8650993704795837, 'normalized_probability': 0.8807970847743115, 'token_text': '2'}}}	{'1': 0.11920291522568854, '2': 0.8807970847743115}	2	2	{'extracted_answer': '2', 'answer_position': 1, 'normalized_probabilities': {'1': 0.3775406802673352, '2': 0.6224593197326648}, 'option_details': {'1': {'probability': 0.3758436143398285, 'normalized_probability': 0.3775406802673352, 'token_text': '1'}, '2': {'probability': 0.6196613311767578, 'normalized_probability': 0.6224593197326648, 'token_text': '2'}}}	{'1': 0.3775406802673352, '2': 0.6224593197326648}	2	2	{'extracted_answer': '2', 'answer_position': 1, 'normalized_probabilities': {'1': 0.22270014452601924, '2': 0.7772998554739807}, 'option_details': {'1': {'probability': 0.2225169837474823, 'normalized_probability': 0.22270014452601924, 'token_text': '1'}, '2': {'probability': 0.7766605615615845, 'normalized_probability': 0.7772998554739807, 'token_text': '2'}}}	{'1': 0.22270014452601924, '2': 0.7772998554739807}
23	هل تشعر بالارتياح لوجود أشخاص من ديانة مختلفة كجيران لك؟ حيث أن "1" تعني "لا" و"2" تعني "نعم". أدخل رقمًا فقط.. يرجى تقديم رقم فقط.	آیا برای شما راحت است که افرادی با مذهب متفاوت همسایه باشند؟ با '1' 'خیر'، '2' 'بله'. فقط یک عدد ارائه کنید	Farklı dinden insanların komşunuz olması sizi rahatsız eder mi? '1' 'Hayır', '2' 'Evet' anlamına gelir. Sadece bir sayı girin.	1	2	2	2	{'extracted_answer': '2', 'answer_position': 1, 'normalized_probabilities': {'1': 0.03732688799580568, '2': 0.9626731120041944}, 'option_details': {'1': {'probability': 0.03718283399939537, 'normalized_probability': 0.03732688799580568, 'token_text': '1'}, '2': {'probability': 0.9589579105377197, 'normalized_probability': 0.9626731120041944, 'token_text': '2'}}}	{'1': 0.03732688799580568, '2': 0.9626731120041944}	2	2	{'extracted_answer': '2', 'answer_position': 1, 'normalized_probabilities': {'1': 0.4687906419967387, '2': 0.5312093580032613}, 'option_details': {'1': {'probability': 0.4668998420238495, 'normalized_probability': 0.4687906419967387, 'token_text': '1'}, '2': {'probability': 0.529066801071167, 'normalized_probability': 0.5312093580032613, 'token_text': '2'}}}	{'1': 0.4687906419967387, '2': 0.5312093580032613}	2	2	{'extracted_answer': '2', 'answer_position': 1, 'normalized_probabilities': {'1': 0.2689414457983831, '2': 0.7310585542016169}, 'option_details': {'1': {'probability': 0.2687324285507202, 'normalized_probability': 0.2689414457983831, 'token_text': '1'}, '2': {'probability': 0.7304903864860535, 'normalized_probability': 0.7310585542016169, 'token_text': '2'}}}	{'1': 0.2689414457983831, '2': 0.7310585542016169}
24	هل تشعر بالارتياح لوجود جيران يشربون الكحول بكثرة؟ حيث أن "1" تعني "لا" و"2" تعني "نعم". يرجى تقديم رقم فقط.	آیا در کنار همسایه بودن افراد زیاد الکل راحت خواهید بود؟ با '1' 'خیر'، '2' 'بله'. فقط یک عدد ارائه کنید	Ağır içki içen komşularınız olsa rahat eder miydiniz? '1' 'Hayır', '2' 'Evet' anlamına gelir. Sadece bir sayı girin.	1	2	1	1	{'extracted_answer': '1', 'answer_position': 1, 'normalized_probabilities': {'1': 0.622459323025353, '2': 0.377540676974647}, 'option_details': {'1': {'probability': 0.6201778054237366, 'normalized_probability': 0.622459323025353, 'token_text': '1'}, '2': {'probability': 0.37615686655044556, 'normalized_probability': 0.377540676974647, 'token_text': '2'}}}	{'1': 0.622459323025353, '2': 0.377540676974647}	2	2	{'extracted_answer': '2', 'answer_position': 1, 'normalized_probabilities': {'1': 0.46879063083173805, '2': 0.5312093691682619}, 'option_details': {'1': {'probability': 0.4670926034450531, 'normalized_probability': 0.46879063083173805, 'token_text': '1'}, '2': {'probability': 0.5292852520942688, 'normalized_probability': 0.5312093691682619, 'token_text': '2'}}}	{'1': 0.46879063083173805, '2': 0.5312093691682619}	2	2	{'extracted_answer': '2', 'answer_position': 1, 'normalized_probabilities': {'1': 0.20181322613766742, '2': 0.7981867738623326}, 'option_details': {'1': {'probability': 0.20158974826335907, 'normalized_probability': 0.20181322613766742, 'token_text': '1'}, '2': {'probability': 0.7973029017448425, 'normalized_probability': 0.7981867738623326, 'token_text': '2'}}}	{'1': 0.20181322613766742, '2': 0.7981867738623326}
25	هل تشعر بالارتياح لوجود زوجين غير متزوجين يعيشان معًا كجيران؟ حيث أن "1" تعني "لا"، و"2" تعني "نعم". أدخل رقمًا فقط.. يرجى تقديم رقم فقط.	آیا با داشتن زوج های مجرد که به عنوان همسایه با هم زندگی می کنند، راحت خواهید بود؟ با '1' 'خیر'، '2' 'بله'. فقط یک عدد ارائه کنید	Evli olmayan çiftlerin komşu olarak birlikte yaşamasından rahatsız olur muydunuz? '1' 'Hayır', '2' 'Evet' anlamına gelir. Sadece bir sayı girin.	1	2	2	2	{'extracted_answer': '2', 'answer_position': 1, 'normalized_probabilities': {'1': 0.26894144882039656, '2': 0.7310585511796034}, 'option_details': {'1': {'probability': 0.2676132619380951, 'normalized_probability': 0.26894144882039656, 'token_text': '1'}, '2': {'probability': 0.7274481654167175, 'normalized_probability': 0.7310585511796034, 'token_text': '2'}}}	{'1': 0.26894144882039656, '2': 0.7310585511796034}	2	2	{'extracted_answer': '2', 'answer_position': 1, 'normalized_probabilities': {'1': 0.32082132405344294, '2': 0.679178675946557}, 'option_details': {'1': {'probability': 0.3187330961227417, 'normalized_probability': 0.32082132405344294, 'token_text': '1'}, '2': {'probability': 0.6747578978538513, 'normalized_probability': 0.679178675946557, 'token_text': '2'}}}	{'1': 0.32082132405344294, '2': 0.679178675946557}	2	2	{'extracted_answer': '2', 'answer_position': 1, 'normalized_probabilities': {'1': 0.34864514796397644, '2': 0.6513548520360236}, 'option_details': {'1': {'probability': 0.34849682450294495, 'normalized_probability': 0.34864514796397644, 'token_text': '1'}, '2': {'probability': 0.6510777473449707, 'normalized_probability': 0.6513548520360236, 'token_text': '2'}}}	{'1': 0.34864514796397644, '2': 0.6513548520360236}
26	هل تشعر بالارتياح لوجود أشخاص يتحدثون لغة مختلفة كجيران؟ حيث أن "1" تعني "لا"، و"2" تعني "نعم". أدخل رقمًا فقط. يرجى تقديم رقم فقط.	آیا داشتن افرادی که به زبانی متفاوت صحبت می کنند به عنوان همسایه راحت خواهید بود؟ با '1' 'خیر'، '2' 'بله'. فقط یک عدد ارائه کنید	Farklı bir dil konuşan insanların komşunuz olması sizi rahatsız eder mi? '1' 'Hayır', '2' 'Evet' anlamına gelir. Sadece bir sayı girin.	1	2	2	2	{'extracted_answer': '2', 'answer_position': 1, 'normalized_probabilities': {'1': 0.24508501066233698, '2': 0.754914989337663}, 'option_details': {'1': {'probability': 0.2435685694217682, 'normalized_probability': 0.24508501066233698, 'token_text': '1'}, '2': {'probability': 0.7502440214157104, 'normalized_probability': 0.754914989337663, 'token_text': '2'}}}	{'1': 0.24508501066233698, '2': 0.754914989337663}	2	2	{'extracted_answer': '2', 'answer_position': 1, 'normalized_probabilities': {'1': 0.1192029218210503, '2': 0.8807970781789497}, 'option_details': {'1': {'probability': 0.11881184577941895, 'normalized_probability': 0.1192029218210503, 'token_text': '1'}, '2': {'probability': 0.877907395362854, 'normalized_probability': 0.8807970781789497, 'token_text': '2'}}}	{'1': 0.1192029218210503, '2': 0.8807970781789497}	2	2	{'extracted_answer': '2', 'answer_position': 1, 'normalized_probabilities': {'1': 0.3208213045341392, '2': 0.6791786954658608}, 'option_details': {'1': {'probability': 0.32060375809669495, 'normalized_probability': 0.3208213045341392, 'token_text': '1'}, '2': {'probability': 0.6787181496620178, 'normalized_probability': 0.6791786954658608, 'token_text': '2'}}}	{'1': 0.3208213045341392, '2': 0.6791786954658608}
27	يرجى الإشارة إلى مدى موافقتك أو عدم موافقتك على العبارة التالية: "كان أحد أهدافي الرئيسية في الحياة هو جعل والديّ فخورين"، بحيث يكون الرقم "1" هو "أوافق بشدة" و"4" هو "أختلف بشدة". يرجى تقديم رقم فقط.	لطفاً مشخص کنید که تا چه حد با این جمله موافق یا مخالف هستید: «یکی از اهداف اصلی من در زندگی این بوده است که پدر و مادرم را سربلند کنم»، با «1» «کاملاً موافقم» و «4» «کاملاً مخالفم». فقط یک عدد ارائه کنید	Lütfen şu ifadeye ne kadar katıldığınızı veya katılmadığınızı belirtin: 'Hayattaki en büyük hedeflerimden biri anne ve babamı gururlandırmak oldu', '1' 'Kesinlikle katılıyorum' ve '4' 'Kesinlikle katılmıyorum' anlamına geliyor. Sadece bir sayı girin.	1	4	2	2	{'extracted_answer': '2', 'answer_position': 1, 'normalized_probabilities': {'1': 0.20818275296898264, '2': 0.38893657348635463, '3': 0.34323531432036175, '4': 0.05964535922430099}, 'option_details': {'1': {'probability': 0.20805150270462036, 'normalized_probability': 0.20818275296898264, 'token_text': '1'}, '2': {'probability': 0.38869136571884155, 'normalized_probability': 0.38893657348635463, …	{'1': 0.20818275296898264, '2': 0.38893657348635463, '3': 0.34323531432036175, '4': 0.05964535922430099}	4	4	{'extracted_answer': '4', 'answer_position': 1, 'normalized_probabilities': {'1': 0.12297134547822577, '2': 0.0352318779287889, '3': 0.03992294647682454, '4': 0.8018738301161608}, 'option_details': {'1': {'probability': 0.12261714041233063, 'normalized_probability': 0.12297134547822577, 'token_text': '1'}, '2': {'probability': 0.035130396485328674, 'normalized_probability': 0.0352318779287889, 't…	{'1': 0.12297134547822577, '2': 0.0352318779287889, '3': 0.03992294647682454, '4': 0.8018738301161608}	1	1	{'extracted_answer': '1', 'answer_position': 1, 'normalized_probabilities': {'1': 0.6117450467891873, '2': 0.056901153745206164, '3': 0.1063053404810085, '4': 0.22504845898459808}, 'option_details': {'1': {'probability': 0.6098987460136414, 'normalized_probability': 0.6117450467891873, 'token_text': '1'}, '2': {'probability': 0.05672942101955414, 'normalized_probability': 0.056901153745206164, 't…	{'1': 0.6117450467891873, '2': 0.056901153745206164, '3': 0.1063053404810085, '4': 0.22504845898459808}
28	يرجى الإشارة إلى مدى موافقتك أو عدم موافقتك على العبارة التالية: "يعاني طفل ما قبل المدرسة من أم عاملة"، بحيث يكون الرقم "1" هو "أوافق بشدة" و"4" هو "أختلف بشدة". يرجى تقديم رقم فقط.	لطفاً مشخص کنید که چقدر با این جمله موافق یا مخالف هستید: "کودک پیش دبستانی از مادر شاغل رنج می برد"، با "1" "کاملا موافقم" و "4" "کاملاً مخالفم". فقط یک عدد ارائه کنید	Lütfen 'Okul öncesi bir çocuk çalışan bir anneden muzdariptir' ifadesine ne kadar güçlü bir şekilde katıldığınızı veya katılmadığınızı belirtin; '1' 'Kesinlikle katılıyorum' ve '4' 'Kesinlikle katılmıyorum' anlamına gelir. Sadece bir sayı belirtin.. Sadece bir sayı girin.	1	4	4	4	{'extracted_answer': '4', 'answer_position': 1, 'normalized_probabilities': {'1': 0.013320221866644768, '2': 0.03620811543833718, '3': 0.12637875299510865, '4': 0.8240929096999094}, 'option_details': {'1': {'probability': 0.013313021510839462, 'normalized_probability': 0.013320221866644768, 'token_text': '1'}, '2': {'probability': 0.03618854284286499, 'normalized_probability': 0.03620811543833718…	{'1': 0.013320221866644768, '2': 0.03620811543833718, '3': 0.12637875299510865, '4': 0.8240929096999094}	4	4	{'extracted_answer': '4', 'answer_position': 1, 'normalized_probabilities': {'1': 0.27262421596000774, '2': 0.16535493990453246, '3': 0.16535493990453246, '4': 0.39666590423092735}, 'option_details': {'1': {'probability': 0.27220046520233154, 'normalized_probability': 0.27262421596000774, 'token_text': '1'}, '2': {'probability': 0.1650979220867157, 'normalized_probability': 0.16535493990453246, '…	{'1': 0.27262421596000774, '2': 0.16535493990453246, '3': 0.16535493990453246, '4': 0.39666590423092735}	1	1	{'extracted_answer': '1', 'answer_position': 1, 'normalized_probabilities': {'1': 0.49720786878797046, '2': 0.12571384145968448, '3': 0.11094207741034917, '4': 0.2661362123419959}, 'option_details': {'1': {'probability': 0.49631693959236145, 'normalized_probability': 0.49720786878797046, 'token_text': '1'}, '2': {'probability': 0.12548857927322388, 'normalized_probability': 0.12571384145968448, '…	{'1': 0.49720786878797046, '2': 0.12571384145968448, '3': 0.11094207741034917, '4': 0.2661362123419959}
29	يرجى الإشارة إلى مدى موافقتك أو عدم موافقتك على العبارة التالية: "الرجال أفضل من النساء في القيادة السياسية"، بحيث يكون الرقم "1" يعني "أوافق بشدة" و"4" يعني "أختلف بشدة". يرجى تقديم رقم فقط.	لطفاً مشخص کنید که چقدر با این جمله موافق یا مخالف هستید: «مردان رهبران سیاسی بهتری نسبت به زنان دارند»، با «1» «کاملاً موافقم» و «4» «کاملاً مخالفم». فقط یک عدد ارائه کنید	Lütfen 'Erkekler kadınlardan daha iyi siyasi liderlerdir' ifadesine ne kadar güçlü bir şekilde katıldığınızı veya katılmadığınızı belirtin; '1' 'Kesinlikle katılıyorum' ve '4' 'Kesinlikle katılmıyorum' anlamına gelir. Sadece bir sayı belirtin.. Sadece bir sayı girin.	1	4	4	4	{'extracted_answer': '4', 'answer_position': 1, 'normalized_probabilities': {'1': 0.001889452141932193, '2': 0.0035299613383611528, '3': 0.015820188746307327, '4': 0.9787603977733993}, 'option_details': {'1': {'probability': 0.0018884381279349327, 'normalized_probability': 0.001889452141932193, 'token_text': '1'}, '2': {'probability': 0.003528066910803318, 'normalized_probability': 0.003529961338…	{'1': 0.001889452141932193, '2': 0.0035299613383611528, '3': 0.015820188746307327, '4': 0.9787603977733993}	4	4	{'extracted_answer': '4', 'answer_position': 1, 'normalized_probabilities': {'1': 0.10244776178568733, '2': 0.013864796632577874, '3': 0.025902849430563743, '4': 0.8577845921511711}, 'option_details': {'1': {'probability': 0.10216794908046722, 'normalized_probability': 0.10244776178568733, 'token_text': '1'}, '2': {'probability': 0.013826928101480007, 'normalized_probability': 0.01386479663257787…	{'1': 0.10244776178568733, '2': 0.013864796632577874, '3': 0.025902849430563743, '4': 0.8577845921511711}	1	1	{'extracted_answer': '1', 'answer_position': 1, 'normalized_probabilities': {'1': 0.5401621520026798, '2': 0.15475905246211105, '3': 0.10636422615419815, '4': 0.19871456938101098}, 'option_details': {'1': {'probability': 0.5398992300033569, 'normalized_probability': 0.5401621520026798, 'token_text': '1'}, '2': {'probability': 0.15468372404575348, 'normalized_probability': 0.15475905246211105, 'to…	{'1': 0.5401621520026798, '2': 0.15475905246211105, '3': 0.10636422615419815, '4': 0.19871456938101098}
30	يرجى الإشارة إلى مدى موافقتك أو عدم موافقتك على العبارة التالية: "الجامعة أكثر أهمية للولد منها للفتاة"، بحيث يكون الرقم "1" هو "أوافق بشدة" و"4" هو "أختلف بشدة". يرجى تقديم رقم فقط.	لطفاً مشخص کنید که چقدر با این جمله موافق یا مخالف هستید: "دانشگاه برای یک پسر مهمتر از یک دختر است"، با "1" "کاملا موافقم" و "4" "کاملاً مخالفم". فقط یک عدد ارائه کنید	Lütfen 'Üniversite bir erkek için bir kızdan daha önemlidir' ifadesine ne kadar güçlü bir şekilde katıldığınızı veya katılmadığınızı belirtin; '1' 'Kesinlikle katılıyorum' ve '4' 'Kesinlikle katılmıyorum' anlamına gelir. Sadece bir sayı belirtin. Sadece bir sayı girin.	1	4	4	4	{'extracted_answer': '4', 'answer_position': 1, 'normalized_probabilities': {'1': 0.004984944377308513, '2': 0.008218783688368477, '3': 0.03683403485642459, '4': 0.9499622370778984}, 'option_details': {'1': {'probability': 0.004983794409781694, 'normalized_probability': 0.004984944377308513, 'token_text': '1'}, '2': {'probability': 0.008216887712478638, 'normalized_probability': 0.008218783688368…	{'1': 0.004984944377308513, '2': 0.008218783688368477, '3': 0.03683403485642459, '4': 0.9499622370778984}	4	4	{'extracted_answer': '4', 'answer_position': 1, 'normalized_probabilities': {'1': 0.035973853757198186, '2': 0.0169928455359517, '3': 0.019255414382560794, '4': 0.9277778863242894}, 'option_details': {'1': {'probability': 0.03593412786722183, 'normalized_probability': 0.035973853757198186, 'token_text': '1'}, '2': {'probability': 0.016974080353975296, 'normalized_probability': 0.0169928455359517,…	{'1': 0.035973853757198186, '2': 0.0169928455359517, '3': 0.019255414382560794, '4': 0.9277778863242894}	1	1	{'extracted_answer': '1', 'answer_position': 1, 'normalized_probabilities': {'1': 0.45766687903727327, '2': 0.07018549156625943, '3': 0.11571631025438821, '4': 0.3564313191420791}, 'option_details': {'1': {'probability': 0.4569031298160553, 'normalized_probability': 0.45766687903727327, 'token_text': '1'}, '2': {'probability': 0.0700683668255806, 'normalized_probability': 0.07018549156625943, 'to…	{'1': 0.45766687903727327, '2': 0.07018549156625943, '3': 0.11571631025438821, '4': 0.3564313191420791}
31	يرجى الإشارة إلى مدى موافقتك أو عدم موافقتك على العبارة التالية: "الرجال أفضل من النساء في إدارة الأعمال"، بحيث يكون الرقم "1" يعني "أوافق بشدة" و"4" يعني "أختلف بشدة". يرجى تقديم رقم فقط.	لطفاً مشخص کنید که چقدر با این جمله موافق یا مخالف هستید: «مردان مدیران تجاری بهتری نسبت به زنان دارند»، با «1» «کاملاً موافقم» و «4» «کاملاً مخالفم». فقط یک عدد ارائه کنید	Lütfen 'Erkekler kadınlardan daha iyi iş yöneticileridir' ifadesine ne kadar güçlü bir şekilde katıldığınızı veya katılmadığınızı belirtin; '1' 'Kesinlikle katılıyorum' ve '4' 'Kesinlikle katılmıyorum' anlamına gelir. Sadece bir sayı belirtin.. Sadece bir sayı girin.	1	4	4	4	{'extracted_answer': '4', 'answer_position': 1, 'normalized_probabilities': {'1': 0.0024101108075355506, '2': 0.005102204860936435, '3': 0.020179611010558297, '4': 0.9723080733209697}, 'option_details': {'1': {'probability': 0.0024090465158224106, 'normalized_probability': 0.0024101108075355506, 'token_text': '1'}, '2': {'probability': 0.005099951755255461, 'normalized_probability': 0.00510220486…	{'1': 0.0024101108075355506, '2': 0.005102204860936435, '3': 0.020179611010558297, '4': 0.9723080733209697}	4	4	{'extracted_answer': '4', 'answer_position': 1, 'normalized_probabilities': {'1': 0.1340847445998087, '2': 0.03841592490752812, '3': 0.05589484258977146, '4': 0.7716044879028917}, 'option_details': {'1': {'probability': 0.13370834290981293, 'normalized_probability': 0.1340847445998087, 'token_text': '1'}, '2': {'probability': 0.03830808401107788, 'normalized_probability': 0.03841592490752812, 'to…	{'1': 0.1340847445998087, '2': 0.03841592490752812, '3': 0.05589484258977146, '4': 0.7716044879028917}	1	1	{'extracted_answer': '1', 'answer_position': 1, 'normalized_probabilities': {'1': 0.408700967135454, '2': 0.24788965781473607, '3': 0.19305667261108114, '4': 0.1503527024387288}, 'option_details': {'1': {'probability': 0.4084486961364746, 'normalized_probability': 0.408700967135454, 'token_text': '1'}, '2': {'probability': 0.24773664772510529, 'normalized_probability': 0.24788965781473607, 'token…	{'1': 0.408700967135454, '2': 0.24788965781473607, '3': 0.19305667261108114, '4': 0.1503527024387288}
32	يرجى الإشارة إلى مدى موافقتك أو عدم موافقتك على العبارة التالية: "إن كونك ربة منزل أمر مُرضٍ مثل العمل مقابل أجر"، بحيث يكون الرقم "1" هو "أوافق بشدة" و"4" هو "أختلف بشدة". يرجى تقديم رقم فقط.	لطفاً مشخص کنید که تا چه حد با این جمله موافق یا مخالف هستید: «خانه دار بودن به همان اندازه کار کردن با دستمزد رضایت بخش است»، با «1» «کاملاً موافقم» و «4» «کاملاً مخالفم». فقط یک عدد ارائه کنید	Lütfen 'Ev hanımı olmak, ücretli çalışmak kadar tatmin edicidir' ifadesine ne kadar güçlü bir şekilde katıldığınızı veya katılmadığınızı belirtin; '1' 'Kesinlikle katılıyorum' ve '4' 'Kesinlikle katılmıyorum' anlamına gelir. Sadece bir sayı belirtin.. Sadece bir sayı girin.	1	4	2	2	{'extracted_answer': '2', 'answer_position': 1, 'normalized_probabilities': {'1': 0.1341422363573902, '2': 0.36463637619431405, '3': 0.2506106937241479, '4': 0.2506106937241479}, 'option_details': {'1': {'probability': 0.13402289152145386, 'normalized_probability': 0.1341422363573902, 'token_text': '1'}, '2': {'probability': 0.36431196331977844, 'normalized_probability': 0.36463637619431405, 'tok…	{'1': 0.1341422363573902, '2': 0.36463637619431405, '3': 0.2506106937241479, '4': 0.2506106937241479}	4	4	{'extracted_answer': '4', 'answer_position': 1, 'normalized_probabilities': {'1': 0.2415229863874589, '2': 0.10068175094077836, '3': 0.14649110053439288, '4': 0.5113041621373698}, 'option_details': {'1': {'probability': 0.24056969583034515, 'normalized_probability': 0.2415229863874589, 'token_text': '1'}, '2': {'probability': 0.10028436034917831, 'normalized_probability': 0.10068175094077836, 'to…	{'1': 0.2415229863874589, '2': 0.10068175094077836, '3': 0.14649110053439288, '4': 0.5113041621373698}	1	1	{'extracted_answer': '1', 'answer_position': 1, 'normalized_probabilities': {'1': 0.3418241321097457, '2': 0.2662128965702717, '3': 0.2662128965702717, '4': 0.12575007474971092}, 'option_details': {'1': {'probability': 0.3416116535663605, 'normalized_probability': 0.3418241321097457, 'token_text': '1'}, '2': {'probability': 0.2660474181175232, 'normalized_probability': 0.2662128965702717, 'token_…	{'1': 0.3418241321097457, '2': 0.2662128965702717, '3': 0.2662128965702717, '4': 0.12575007474971092}
33	يرجى الإشارة إلى مدى موافقتك أو عدم موافقتك على العبارة التالية: "عندما تكون الوظائف نادرة، يجب أن يكون للرجال حق في الحصول على وظيفة أكثر من النساء"، بحيث يكون الرقم "1" هو "موافق بشدة" و"5" هو "غير موافق بشدة". يرجى تقديم رقم فقط.	لطفاً مشخص کنید که چقدر با این جمله موافق یا مخالف هستید: «وقتی مشاغل کمیاب هستند، مردان باید نسبت به زنان حق شغلی بیشتری داشته باشند»، با «1» «کاملاً موافقم» و «5» «کاملاً مخالفم». فقط یک عدد ارائه کنید	Lütfen şu ifadeye ne kadar katıldığınızı veya katılmadığınızı belirtin: 'İşler kıt olduğunda, erkeklerin kadınlardan daha fazla işe girme hakkı olmalıdır'. '1' 'Kesinlikle katılıyorum' ve '5' 'Kesinlikle katılmıyorum' anlamına gelir. Sadece bir sayı belirtin. Sadece bir sayı girin.	1	5	5	5	{'extracted_answer': '5', 'answer_position': 1, 'normalized_probabilities': {'1': 0.002442274687323759, '2': 0.0013072553686277143, '3': 0.002442274687323759, '4': 0.00852437568704371, '5': 0.985283819569681}, 'option_details': {'1': {'probability': 0.0024417589884251356, 'normalized_probability': 0.002442274687323759, 'token_text': '1'}, '2': {'probability': 0.0013069793349131942, 'normalized_pr…	{'1': 0.002442274687323759, '2': 0.0013072553686277143, '3': 0.002442274687323759, '4': 0.00852437568704371, '5': 0.985283819569681}	5	5	{'extracted_answer': '5', 'answer_position': 1, 'normalized_probabilities': {'1': 0.08036186401607859, '2': 0.020318662915915834, '3': 0.023024060319032993, '4': 0.012323890783415607, '5': 0.8639715219655569}, 'option_details': {'1': {'probability': 0.07998844236135483, 'normalized_probability': 0.08036186401607859, 'token_text': '1'}, '2': {'probability': 0.020224247127771378, 'normalized_probab…	{'1': 0.08036186401607859, '2': 0.020318662915915834, '3': 0.023024060319032993, '4': 0.012323890783415607, '5': 0.8639715219655569}	1	1	{'extracted_answer': '1', 'answer_position': 1, 'normalized_probabilities': {'1': 0.5129173932269468, '2': 0.0540610933824466, '3': 0.08913166739142817, '4': 0.032789712305994353, '5': 0.311100133693184}, 'option_details': {'1': {'probability': 0.5112124681472778, 'normalized_probability': 0.5129173932269468, 'token_text': '1'}, '2': {'probability': 0.05388139560818672, 'normalized_probability': …	{'1': 0.5129173932269468, '2': 0.0540610933824466, '3': 0.08913166739142817, '4': 0.032789712305994353, '5': 0.311100133693184}
34	يرجى الإشارة إلى مدى موافقتك أو عدم موافقتك على العبارة التالية: "عندما تكون الوظائف نادرة، يجب أن يكون للرجال حق في الحصول على وظيفة أكثر من النساء"، بحيث يكون الرقم "1" هو "أوافق بشدة" و"3" هو "أختلف بشدة". يرجى تقديم رقم فقط.	لطفاً مشخص کنید که تا چه حد با این جمله موافق یا مخالف هستید: «وقتی مشاغل کمیاب هستند، مردان باید نسبت به زنان حق شغل بیشتری داشته باشند»، با «1» «کاملاً موافقم» و «3» «کاملاً مخالفم». فقط یک عدد ارائه کنید	Lütfen şu ifadeye ne kadar katıldığınızı veya katılmadığınızı belirtin: 'İşler kıt olduğunda, erkeklerin kadınlardan daha fazla işe girme hakkı olmalıdır'. '1' 'Kesinlikle katılıyorum' ve '3' 'Kesinlikle katılmıyorum' anlamına gelir. Sadece bir sayı belirtin.. Sadece bir sayı girin.	1	3	3	3	{'extracted_answer': '3', 'answer_position': 1, 'normalized_probabilities': {'1': 0.018202569180492442, '2': 0.10474855493481161, '3': 0.8770488758846959}, 'option_details': {'1': {'probability': 0.018189337104558945, 'normalized_probability': 0.018202569180492442, 'token_text': '1'}, '2': {'probability': 0.10467240959405899, 'normalized_probability': 0.10474855493481161, 'token_text': '2'}, '3':…	{'1': 0.018202569180492442, '2': 0.10474855493481161, '3': 0.8770488758846959}	3	3	{'extracted_answer': '3', 'answer_position': 1, 'normalized_probabilities': {'1': 0.03639324103231461, '2': 0.02501268550163611, '3': 0.9385940734660493}, 'option_details': {'1': {'probability': 0.036142878234386444, 'normalized_probability': 0.03639324103231461, 'token_text': '1'}, '2': {'probability': 0.024840613827109337, 'normalized_probability': 0.02501268550163611, 'token_text': '2'}, '3': …	{'1': 0.03639324103231461, '2': 0.02501268550163611, '3': 0.9385940734660493}	1	1	{'extracted_answer': '1', 'answer_position': 1, 'normalized_probabilities': {'1': 0.5603052402208935, '2': 0.20612479620479982, '3': 0.2335699635743068}, 'option_details': {'1': {'probability': 0.5587908625602722, 'normalized_probability': 0.5603052402208935, 'token_text': '1'}, '2': {'probability': 0.20556768774986267, 'normalized_probability': 0.20612479620479982, 'token_text': '2'}, '3': {'pro…	{'1': 0.5603052402208935, '2': 0.20612479620479982, '3': 0.2335699635743068}
35	يرجى الإشارة إلى مدى موافقتك أو عدم موافقتك على العبارة التالية: "عندما تكون الوظائف نادرة، يجب على أصحاب العمل إعطاء الأولوية للمواطنين المولودين في البلاد على المهاجرين"، بحيث يكون الرقم "1" هو "أوافق بشدة" و"5" هو "أختلف بشدة". يرجى تقديم رقم فقط.	لطفاً مشخص کنید که تا چه حد با این جمله موافق یا مخالف هستید: «وقتی مشاغل کمیاب هستند، کارفرمایان باید شهروندان بومی را نسبت به مهاجران در اولویت قرار دهند» که «1» «کاملاً موافقم» و «5» «کاملاً مخالفم» است. فقط یک عدد ارائه کنید	Lütfen şu ifadeye ne kadar katıldığınızı veya katılmadığınızı belirtin: 'İşler kıt olduğunda, işverenler göçmenlere göre yerli vatandaşlara öncelik vermelidir', '1' 'Kesinlikle katılıyorum' ve '5' 'Kesinlikle katılmıyorum' anlamına gelmektedir. Sadece bir sayı girin.	1	5	3	3	{'extracted_answer': '3', 'answer_position': 1, 'normalized_probabilities': {'1': 0.030292915730289145, '2': 0.09330875596873248, '3': 0.6084494822633724, '4': 0.2536394855128657, '5': 0.014309360524740293}, 'option_details': {'1': {'probability': 0.030264725908637047, 'normalized_probability': 0.030292915730289145, 'token_text': '1'}, '2': {'probability': 0.09322192519903183, 'normalized_probabi…	{'1': 0.030292915730289145, '2': 0.09330875596873248, '3': 0.6084494822633724, '4': 0.2536394855128657, '5': 0.014309360524740293}	5	5	{'extracted_answer': '5', 'answer_position': 1, 'normalized_probabilities': {'1': 0.21417713964013532, '2': 0.04217397716911098, '3': 0.061362775338792655, '4': 0.02257410462855406, '5': 0.659712003223407}, 'option_details': {'1': {'probability': 0.2131640911102295, 'normalized_probability': 0.21417713964013532, 'token_text': '1'}, '2': {'probability': 0.041974496096372604, 'normalized_probabilit…	{'1': 0.21417713964013532, '2': 0.04217397716911098, '3': 0.061362775338792655, '4': 0.02257410462855406, '5': 0.659712003223407}	1	1	{'extracted_answer': '1', 'answer_position': 1, 'normalized_probabilities': {'1': 0.6590262393727413, '2': 0.03281098582782329, '3': 0.07870946227388097, '4': 0.01549881268286947, '5': 0.213954499842685}, 'option_details': {'1': {'probability': 0.6583699584007263, 'normalized_probability': 0.6590262393727413, 'token_text': '1'}, '2': {'probability': 0.032778311520814896, 'normalized_probability':…	{'1': 0.6590262393727413, '2': 0.03281098582782329, '3': 0.07870946227388097, '4': 0.01549881268286947, '5': 0.213954499842685}
36	يرجى الإشارة إلى مدى موافقتك أو عدم موافقتك على العبارة التالية: "عندما تكون الوظائف نادرة، يجب على أصحاب العمل إعطاء الأولوية للمواطنين المولودين في البلاد على المهاجرين"، بحيث يكون الرقم "1" هو "أوافق بشدة" و"3" هو "أختلف بشدة". يرجى تقديم رقم فقط.	لطفاً مشخص کنید که چقدر با این جمله موافق یا مخالف هستید: «وقتی مشاغل کمیاب هستند، کارفرمایان باید شهروندان بومی را نسبت به مهاجران در اولویت قرار دهند»، با «1» «کاملاً موافقم» و «3» «کاملاً مخالفم». فقط یک عدد ارائه کنید	Lütfen şu ifadeye ne kadar katıldığınızı veya katılmadığınızı belirtin: 'İşler kıt olduğunda, işverenler göçmenlere göre yerli vatandaşlara öncelik vermelidir', '1' 'Kesinlikle katılıyorum' ve '3' 'Kesinlikle katılmıyorum' anlamına gelir. Sadece bir sayı belirtin. Sadece bir sayı girin.	1	3	2	2	{'extracted_answer': '2', 'answer_position': 1, 'normalized_probabilities': {'1': 0.03516290283709224, '2': 0.9068632708734383, '3': 0.05797382628946943}, 'option_details': {'1': {'probability': 0.035133715718984604, 'normalized_probability': 0.03516290283709224, 'token_text': '1'}, '2': {'probability': 0.9061105251312256, 'normalized_probability': 0.9068632708734383, 'token_text': '2'}, '3': {'p…	{'1': 0.03516290283709224, '2': 0.9068632708734383, '3': 0.05797382628946943}	3	3	{'extracted_answer': '3', 'answer_position': 1, 'normalized_probabilities': {'1': 0.2938147904191617, '2': 0.08417934131736526, '3': 0.622005868263473}, 'option_details': {'1': {'probability': 0.2924625277519226, 'normalized_probability': 0.2938147904191617, 'token_text': '1'}, '2': {'probability': 0.08379191160202026, 'normalized_probability': 0.08417934131736526, 'token_text': '2'}, '3': {'prob…	{'1': 0.2938147904191617, '2': 0.08417934131736526, '3': 0.622005868263473}	1	1	{'extracted_answer': '1', 'answer_position': 1, 'normalized_probabilities': {'1': 0.8431497279176762, '2': 0.07842513604116194, '3': 0.07842513604116194}, 'option_details': {'1': {'probability': 0.8420329093933105, 'normalized_probability': 0.8431497279176762, 'token_text': '1'}, '2': {'probability': 0.07832125574350357, 'normalized_probability': 0.07842513604116194, 'token_text': '2'}, '3': {'pr…	{'1': 0.8431497279176762, '2': 0.07842513604116194, '3': 0.07842513604116194}
37	يرجى الإشارة إلى مدى موافقتك أو عدم موافقتك على العبارة التالية: "إن حصول المرأة على دخل أكبر من دخل زوجها يمثل مشكلة"، بحيث يشير الرقم "1" إلى "موافق بشدة" و"5" إلى "غير موافق بشدة". يرجى تقديم رقم فقط.	لطفاً مشخص کنید که چقدر با این جمله موافق یا مخالف هستید: «اگر زنان درآمد بیشتری نسبت به همسرشان داشته باشند، مشکل است»، با «1» «کاملاً موافقم» و «5» «کاملاً مخالفم». فقط یک عدد ارائه کنید	Lütfen 'Kadınların kocalarından daha fazla gelire sahip olması bir sorundur' ifadesine ne kadar güçlü bir şekilde katıldığınızı veya katılmadığınızı belirtin; '1' 'Kesinlikle katılıyorum' ve '5' 'Kesinlikle katılmıyorum' anlamına gelir. Sadece bir sayı belirtin.. Sadece bir sayı girin.	1	5	3	3	{'extracted_answer': '3', 'answer_position': 1, 'normalized_probabilities': {'1': 0.0222644535619598, '2': 0.1451824840163567, '3': 0.6506626969154303, '4': 0.1451824840163567, '5': 0.03670788148989648}, 'option_details': {'1': {'probability': 0.022252516821026802, 'normalized_probability': 0.0222644535619598, 'token_text': '1'}, '2': {'probability': 0.14510464668273926, 'normalized_probability':…	{'1': 0.0222644535619598, '2': 0.1451824840163567, '3': 0.6506626969154303, '4': 0.1451824840163567, '5': 0.03670788148989648}	5	5	{'extracted_answer': '5', 'answer_position': 0, 'normalized_probabilities': {'1': 0.33423162984537425, '2': 0.1578798336091703, '3': 0.0957589642421792, '4': 0.1350417920184898, '5': 0.2770877802847865}, 'option_details': {'1': {'probability': 8.513511420460418e-05, 'normalized_probability': 0.33423162984537425, 'token_text': '1'}, '2': {'probability': 4.021497807116248e-05, 'normalized_probabili…	{'1': 0.33423162984537425, '2': 0.1578798336091703, '3': 0.0957589642421792, '4': 0.1350417920184898, '5': 0.2770877802847865}	1	1	{'extracted_answer': '1', 'answer_position': 1, 'normalized_probabilities': {'1': 0.4252552968950084, '2': 0.05078950297316855, '3': 0.20087638901205518, '4': 0.030805391496478464, '5': 0.2922734196232894}, 'option_details': {'1': {'probability': 0.4248661398887634, 'normalized_probability': 0.4252552968950084, 'token_text': '1'}, '2': {'probability': 0.05074302479624748, 'normalized_probability'…	{'1': 0.4252552968950084, '2': 0.05078950297316855, '3': 0.20087638901205518, '4': 0.030805391496478464, '5': 0.2922734196232894}
38	يرجى الإشارة إلى مدى موافقتك أو عدم موافقتك على العبارة التالية: "إن حصول المرأة على دخل أكبر من دخل زوجها يمثل مشكلة"، بحيث يشير الرقم "1" إلى "موافق بشدة" و"3" إلى "غير موافق بشدة". يرجى تقديم رقم فقط.	لطفاً مشخص کنید که چقدر با این جمله موافق یا مخالف هستید: "اگر زنان درآمد بیشتری نسبت به همسر خود داشته باشند مشکل است"، با "1" "کاملا موافق" و "3" "کاملا مخالف" است. فقط یک عدد ارائه کنید	Lütfen 'Kadınların kocalarından daha fazla gelire sahip olması bir sorundur' ifadesine ne kadar güçlü bir şekilde katıldığınızı veya katılmadığınızı belirtin; '1' 'Kesinlikle katılıyorum' ve '3' 'Kesinlikle katılmıyorum' anlamına gelir. Sadece bir sayı belirtin.. Sadece bir sayı girin.	1	3	2	2	{'extracted_answer': '2', 'answer_position': 1, 'normalized_probabilities': {'1': 0.011499452665615747, '2': 0.9135146945690767, '3': 0.07498585276530755}, 'option_details': {'1': {'probability': 0.011489477008581161, 'normalized_probability': 0.011499452665615747, 'token_text': '1'}, '2': {'probability': 0.9127222299575806, 'normalized_probability': 0.9135146945690767, 'token_text': '2'}, '3': {…	{'1': 0.011499452665615747, '2': 0.9135146945690767, '3': 0.07498585276530755}	3	3	{'extracted_answer': '3', 'answer_position': 1, 'normalized_probabilities': {'1': 0.08330658510483795, '2': 0.02106320439374574, '3': 0.8956302105014163}, 'option_details': {'1': {'probability': 0.0831044390797615, 'normalized_probability': 0.08330658510483795, 'token_text': '1'}, '2': {'probability': 0.021012093871831894, 'normalized_probability': 0.02106320439374574, 'token_text': '2'}, '3': {'…	{'1': 0.08330658510483795, '2': 0.02106320439374574, '3': 0.8956302105014163}	1	1	{'extracted_answer': '1', 'answer_position': 1, 'normalized_probabilities': {'1': 0.5603052221087075, '2': 0.2061248029239767, '3': 0.23356997496731577}, 'option_details': {'1': {'probability': 0.5597365498542786, 'normalized_probability': 0.5603052221087075, 'token_text': '1'}, '2': {'probability': 0.20591560006141663, 'normalized_probability': 0.2061248029239767, 'token_text': '2'}, '3': {'prob…	{'1': 0.5603052221087075, '2': 0.2061248029239767, '3': 0.23356997496731577}
39	يرجى الإشارة إلى مدى موافقتك أو عدم موافقتك على العبارة التالية: "الأزواج المثليون هم آباء جيدون مثل الأزواج الآخرين"، بحيث يكون الرقم "1" هو "أوافق بشدة" و"5" هو "أختلف بشدة". يرجى تقديم رقم فقط.	لطفاً مشخص کنید که چقدر با این جمله موافق یا مخالف هستید: «زوج‌های همجنس‌گرا به‌اندازه سایر زوج‌ها والدین خوبی هستند»، «1» «کاملاً موافقم» و «5» «کاملاً مخالفم». فقط یک عدد ارائه کنید	Lütfen 'Eşcinsel çiftler diğer çiftler kadar iyi ebeveynlerdir' ifadesine ne kadar güçlü bir şekilde katıldığınızı veya katılmadığınızı belirtin; '1' 'Kesinlikle katılıyorum' ve '5' 'Kesinlikle katılmıyorum' anlamına gelir. Sadece bir sayı belirtin. Sadece bir sayı girin.	1	5	3	3	{'extracted_answer': '3', 'answer_position': 1, 'normalized_probabilities': {'1': 0.10311129154875431, '2': 0.10311129154875431, '3': 0.40781304515056493, '4': 0.3598937565250287, '5': 0.026070615226897742}, 'option_details': {'1': {'probability': 0.10302359610795975, 'normalized_probability': 0.10311129154875431, 'token_text': '1'}, '2': {'probability': 0.10302359610795975, 'normalized_probabili…	{'1': 0.10311129154875431, '2': 0.10311129154875431, '3': 0.40781304515056493, '4': 0.3598937565250287, '5': 0.026070615226897742}	5	5	{'extracted_answer': '5', 'answer_position': 0, 'normalized_probabilities': {'1': 0.2328815602544308, '2': 0.1369039998329686, '3': 0.11000545899918045, '4': 0.18136833295093338, '5': 0.3388406479624868}, 'option_details': {'1': {'probability': 0.00010396000288892537, 'normalized_probability': 0.2328815602544308, 'token_text': '1'}, '2': {'probability': 6.111492984928191e-05, 'normalized_probabil…	{'1': 0.2328815602544308, '2': 0.1369039998329686, '3': 0.11000545899918045, '4': 0.18136833295093338, '5': 0.3388406479624868}	1	1	{'extracted_answer': '1', 'answer_position': 1, 'normalized_probabilities': {'1': 0.4501512529637244, '2': 0.0886400358401833, '3': 0.21263640535749542, '4': 0.06092134793695944, '5': 0.18765095790163744}, 'option_details': {'1': {'probability': 0.44983795285224915, 'normalized_probability': 0.4501512529637244, 'token_text': '1'}, '2': {'probability': 0.08857834339141846, 'normalized_probability'…	{'1': 0.4501512529637244, '2': 0.0886400358401833, '3': 0.21263640535749542, '4': 0.06092134793695944, '5': 0.18765095790163744}
40	يرجى الإشارة إلى مدى موافقتك أو عدم موافقتك على العبارة التالية: "إن إنجاب الأطفال واجب تجاه المجتمع"، بحيث يكون الرقم "1" هو "أوافق بشدة" و"5" هو "أختلف بشدة". يرجى تقديم رقم فقط.	لطفاً مشخص کنید که تا چه حد با این جمله موافق یا مخالف هستید: «فرزندآوری یک وظیفه در قبال جامعه است» که «1» «کاملاً موافقم» و «5» «کاملاً مخالفم». فقط یک عدد ارائه کنید	Lütfen 'Çocuk sahibi olmak topluma karşı bir görevdir' ifadesine ne kadar güçlü bir şekilde katıldığınızı veya katılmadığınızı belirtin; '1' 'Kesinlikle katılıyorum' ve '5' 'Kesinlikle katılmıyorum' anlamına gelir. Sadece bir sayı belirtin.. Sadece bir sayı girin.	1	5	3	3	{'extracted_answer': '3', 'answer_position': 1, 'normalized_probabilities': {'1': 0.04174595124289548, '2': 0.11347725378156429, '3': 0.3495345555385334, '4': 0.1457076838984734, '5': 0.3495345555385334}, 'option_details': {'1': {'probability': 0.04171334207057953, 'normalized_probability': 0.04174595124289548, 'token_text': '1'}, '2': {'probability': 0.11338861286640167, 'normalized_probability'…	{'1': 0.04174595124289548, '2': 0.11347725378156429, '3': 0.3495345555385334, '4': 0.1457076838984734, '5': 0.3495345555385334}	5	5	{'extracted_answer': '5', 'answer_position': 0, 'normalized_probabilities': {'1': 0.13635293129879, '2': 0.12033103110720123, '3': 0.10292458484426875, '4': 0.16447300952640198, '5': 0.47591844322333804}, 'option_details': {'1': {'probability': 5.00005844514817e-05, 'normalized_probability': 0.13635293129879, 'token_text': '1'}, '2': {'probability': 4.4125357817392796e-05, 'normalized_probability…	{'1': 0.13635293129879, '2': 0.12033103110720123, '3': 0.10292458484426875, '4': 0.16447300952640198, '5': 0.47591844322333804}	1	1	{'extracted_answer': '1', 'answer_position': 1, 'normalized_probabilities': {'1': 0.49993284220771694, '2': 0.07666718424351904, '3': 0.1623044235618791, '4': 0.05269253381913478, '5': 0.20840301616775014}, 'option_details': {'1': {'probability': 0.4919590950012207, 'normalized_probability': 0.49993284220771694, 'token_text': '1'}, '2': {'probability': 0.07544437050819397, 'normalized_probability…	{'1': 0.49993284220771694, '2': 0.07666718424351904, '3': 0.1623044235618791, '4': 0.05269253381913478, '5': 0.20840301616775014}
41	يرجى الإشارة إلى مدى موافقتك أو عدم موافقتك على العبارة التالية: "من واجب الأطفال رعاية الوالدين المرضى"، بحيث يكون الرقم "1" هو "أوافق بشدة" و"5" هو "أختلف بشدة". يرجى تقديم رقم فقط.	لطفاً مشخص کنید که تا چه حد با این جمله موافق یا مخالف هستید: "وظیفه فرزندان مراقبت از والدین بیمار است"، با "1" "کاملا موافقم" و "5" "کاملاً مخالفم". فقط یک عدد ارائه کنید	Lütfen 'Hasta ebeveynlere bakmak çocukların görevidir' ifadesine ne kadar güçlü bir şekilde katıldığınızı veya katılmadığınızı belirtin; '1' 'Kesinlikle katılıyorum' ve '5' 'Kesinlikle katılmıyorum' anlamına gelir. Sadece bir sayı belirtin.. Sadece bir sayı girin.	1	5	5	5	{'extracted_answer': '5', 'answer_position': 1, 'normalized_probabilities': {'1': 0.06996655675029263, '2': 0.1153553583458618, '3': 0.24420729348395256, '4': 0.1678410465523369, '5': 0.40262974486755615}, 'option_details': {'1': {'probability': 0.06990066915750504, 'normalized_probability': 0.06996655675029263, 'token_text': '1'}, '2': {'probability': 0.1152467280626297, 'normalized_probability'…	{'1': 0.06996655675029263, '2': 0.1153553583458618, '3': 0.24420729348395256, '4': 0.1678410465523369, '5': 0.40262974486755615}	5	5	{'extracted_answer': '5', 'answer_position': 1, 'normalized_probabilities': {'1': 0.2308813175466107, '2': 0.07495618744066339, '3': 0.10906060444373003, '4': 0.031246390664222516, '5': 0.5538554999047733}, 'option_details': {'1': {'probability': 0.23052045702934265, 'normalized_probability': 0.2308813175466107, 'token_text': '1'}, '2': {'probability': 0.0748390331864357, 'normalized_probability'…	{'1': 0.2308813175466107, '2': 0.07495618744066339, '3': 0.10906060444373003, '4': 0.031246390664222516, '5': 0.5538554999047733}	1	1	{'extracted_answer': '1', 'answer_position': 1, 'normalized_probabilities': {'1': 0.5651203906747124, '2': 0.09820319273527071, '3': 0.14288480446869195, '4': 0.0318819127767807, '5': 0.1619096993445442}, 'option_details': {'1': {'probability': 0.5648105144500732, 'normalized_probability': 0.5651203906747124, 'token_text': '1'}, '2': {'probability': 0.09814934432506561, 'normalized_probability': …	{'1': 0.5651203906747124, '2': 0.09820319273527071, '3': 0.14288480446869195, '4': 0.0318819127767807, '5': 0.1619096993445442}
42	يرجى الإشارة إلى مدى موافقتك أو عدم موافقتك على العبارة التالية: "الأشخاص الذين لا يعملون يصبحون كسالى"، بحيث يكون الرقم "1" هو "أوافق بشدة" و"5" هو "أختلف بشدة". يرجى تقديم رقم فقط.	لطفاً مشخص کنید که تا چه حد با این جمله موافق یا مخالف هستید: «افرادی که کار نمی‌کنند تنبل می‌شوند» که «1» «کاملاً موافقم» و «5» «کاملاً مخالفم». فقط یک عدد ارائه کنید	Lütfen 'Çalışmayan insanlar tembelleşir' ifadesine ne kadar katıldığınızı veya katılmadığınızı belirtin; '1' 'Kesinlikle katılıyorum' ve '5' 'Kesinlikle katılmıyorum' anlamına gelir. Sadece bir sayı belirtin. Sadece bir sayı girin.	1	5	5	5	{'extracted_answer': '5', 'answer_position': 1, 'normalized_probabilities': {'1': 0.0025093636410082935, '2': 0.01444038917112925, '3': 0.03925305049265898, '4': 0.05040191510307345, '5': 0.89339528159213}, 'option_details': {'1': {'probability': 0.00250817253254354, 'normalized_probability': 0.0025093636410082935, 'token_text': '1'}, '2': {'probability': 0.014433534815907478, 'normalized_probabi…	{'1': 0.0025093636410082935, '2': 0.01444038917112925, '3': 0.03925305049265898, '4': 0.05040191510307345, '5': 0.89339528159213}	5	5	{'extracted_answer': '5', 'answer_position': 1, 'normalized_probabilities': {'1': 0.10119822486429204, '2': 0.017585613468826176, '3': 0.025586918825976832, '4': 0.008306856209117868, '5': 0.847322386631787}, 'option_details': {'1': {'probability': 0.1006205752491951, 'normalized_probability': 0.10119822486429204, 'token_text': '1'}, '2': {'probability': 0.017485233023762703, 'normalized_probabil…	{'1': 0.10119822486429204, '2': 0.017585613468826176, '3': 0.025586918825976832, '4': 0.008306856209117868, '5': 0.847322386631787}	3	3	{'extracted_answer': '3', 'answer_position': 1, 'normalized_probabilities': {'1': 0.3157727210665956, '2': 0.16902094323559255, '3': 0.40546019630108965, '4': 0.05487306969836108, '5': 0.05487306969836108}, 'option_details': {'1': {'probability': 0.314594030380249, 'normalized_probability': 0.3157727210665956, 'token_text': '1'}, '2': {'probability': 0.16839003562927246, 'normalized_probability':…	{'1': 0.3157727210665956, '2': 0.16902094323559255, '3': 0.40546019630108965, '4': 0.05487306969836108, '5': 0.05487306969836108}
43	يرجى الإشارة إلى مدى موافقتك أو عدم موافقتك على العبارة التالية: "العمل واجب تجاه المجتمع"، بحيث يكون الرقم "1" هو "أوافق بشدة" و"5" هو "أختلف بشدة". يرجى تقديم رقم فقط.	لطفاً مشخص کنید که چقدر با این جمله موافق یا مخالف هستید: "کار یک وظیفه در قبال جامعه است"، با "1" "کاملا موافق" و "5" "کاملاً مخالفم". فقط یک عدد ارائه دهید. فقط یک عدد ارائه کنید	Lütfen 'Çalışmak topluma karşı bir görevdir' ifadesine ne kadar güçlü bir şekilde katıldığınızı veya katılmadığınızı belirtin; '1' 'Kesinlikle katılıyorum' ve '5' 'Kesinlikle katılmıyorum' anlamına gelir. Sadece bir sayı belirtin.. Sadece bir sayı girin.	1	5	1	1	{'extracted_answer': '1', 'answer_position': 1, 'normalized_probabilities': {'1': 0.3594815074990748, '2': 0.14985418510217502, '3': 0.21803654974050912, '4': 0.19241658750321977, '5': 0.08021117015502129}, 'option_details': {'1': {'probability': 0.35924282670021057, 'normalized_probability': 0.3594815074990748, 'token_text': '1'}, '2': {'probability': 0.14975468814373016, 'normalized_probability…	{'1': 0.3594815074990748, '2': 0.14985418510217502, '3': 0.21803654974050912, '4': 0.19241658750321977, '5': 0.08021117015502129}	1	1	{'extracted_answer': '1', 'answer_position': 1, 'normalized_probabilities': {'1': 0.36708397813505494, '2': 0.11917471887701378, '3': 0.1350426641023496, '4': 0.09281336376994793, '5': 0.2858852751156338}, 'option_details': {'1': {'probability': 0.36589425802230835, 'normalized_probability': 0.36708397813505494, 'token_text': '1'}, '2': {'probability': 0.1187884733080864, 'normalized_probability'…	{'1': 0.36708397813505494, '2': 0.11917471887701378, '3': 0.1350426641023496, '4': 0.09281336376994793, '5': 0.2858852751156338}	1	1	{'extracted_answer': '1', 'answer_position': 1, 'normalized_probabilities': {'1': 0.4924905778694466, '2': 0.08558202188938582, '3': 0.20530060726432126, '4': 0.07552588056323382, '5': 0.14110091241361253}, 'option_details': {'1': {'probability': 0.4897676408290863, 'normalized_probability': 0.4924905778694466, 'token_text': '1'}, '2': {'probability': 0.08510884642601013, 'normalized_probability'…	{'1': 0.4924905778694466, '2': 0.08558202188938582, '3': 0.20530060726432126, '4': 0.07552588056323382, '5': 0.14110091241361253}
44	يرجى الإشارة إلى مدى موافقتك أو عدم موافقتك على العبارة التالية: "يجب أن يأتي العمل دائمًا في المقام الأول، حتى لو كان ذلك يعني قلة وقت الفراغ"، بحيث يكون الرقم "1" هو "أوافق بشدة" و"5" هو "أختلف بشدة". يرجى تقديم رقم فقط.	لطفاً مشخص کنید که تا چه حد با این جمله موافق یا مخالف هستید: «کار همیشه باید در اولویت باشد، حتی اگر به معنای وقت خالی کمتر باشد»، با «1» «کاملاً موافقم» و «5» «کاملاً مخالفم». فقط یک عدد ارائه کنید	Lütfen 'Daha az boş zaman anlamına gelse bile, iş her zaman önce gelmelidir' ifadesine ne kadar güçlü bir şekilde katıldığınızı veya katılmadığınızı belirtin; '1' 'Kesinlikle katılıyorum' ve '5' 'Kesinlikle katılmıyorum' anlamına gelir. Yalnızca bir sayı belirtin.. Sadece bir sayı girin.	1	5	3	3	{'extracted_answer': '3', 'answer_position': 1, 'normalized_probabilities': {'1': 0.05207229655855505, '2': 0.16039396499080755, '3': 0.5598299265770103, '4': 0.18175016983819706, '5': 0.04595364203543004}, 'option_details': {'1': {'probability': 0.05205334350466728, 'normalized_probability': 0.05207229655855505, 'token_text': '1'}, '2': {'probability': 0.16033558547496796, 'normalized_probabilit…	{'1': 0.05207229655855505, '2': 0.16039396499080755, '3': 0.5598299265770103, '4': 0.18175016983819706, '5': 0.04595364203543004}	5	5	{'extracted_answer': '5', 'answer_position': 1, 'normalized_probabilities': {'1': 0.2597828017267848, '2': 0.10829359571501267, '3': 0.22925752636991176, '4': 0.10829359571501267, '5': 0.29437248047327813}, 'option_details': {'1': {'probability': 0.25915563106536865, 'normalized_probability': 0.2597828017267848, 'token_text': '1'}, '2': {'probability': 0.10803215205669403, 'normalized_probability…	{'1': 0.2597828017267848, '2': 0.10829359571501267, '3': 0.22925752636991176, '4': 0.10829359571501267, '5': 0.29437248047327813}	1	1	{'extracted_answer': '1', 'answer_position': 1, 'normalized_probabilities': {'1': 0.4897221687183272, '2': 0.12382115055546238, '3': 0.2041465582834113, '4': 0.05848897188733671, '5': 0.12382115055546238}, 'option_details': {'1': {'probability': 0.48939603567123413, 'normalized_probability': 0.4897221687183272, 'token_text': '1'}, '2': {'probability': 0.12373869121074677, 'normalized_probability'…	{'1': 0.4897221687183272, '2': 0.12382115055546238, '3': 0.2041465582834113, '4': 0.05848897188733671, '5': 0.12382115055546238}
45	أي مما يلي يصف على أفضل وجه موقفك تجاه المجتمع الذي نعيش فيه؟ اكتب رقمًا فقط. 1 - يجب تغيير الطريقة التي يتم بها تنظيم مجتمعنا بالكامل جذريًا من خلال العمل الثوري. 2 - يجب تحسين مجتمعنا تدريجيًا من خلال الإصلاحات. 3 - يجب الدفاع عن مجتمعنا الحالي بشجاعة ضد جميع القوى التخريبية. يرجى تقديم رقم فقط.	کدام یک از موارد زیر نگرش شما را نسبت به جامعه ای که در آن زندگی می کنیم بهتر توصیف می کند؟ فقط یک عدد ارائه کنید 1 - کل نحوه سازماندهی جامعه ما باید با اقدام انقلابی به طور اساسی تغییر کند. 2- جامعه ما باید به تدریج با اصلاحات بهبود یابد. 3- جامعه کنونی ما باید شجاعانه در برابر همه نیروهای برانداز دفاع شود. فقط یک عدد ارائه کنید	Aşağıdakilerden hangisi içinde yaşadığımız topluma karşı tutumunuzu en iyi şekilde tanımlar? Sadece bir sayı verin. 1 - Toplumumuzun örgütlenme biçiminin tamamı devrimci eylemle kökten değiştirilmelidir. 2 - Toplumumuz reformlarla kademeli olarak iyileştirilmelidir. 3 - Mevcut toplumumuz tüm yıkıcı güçlere karşı cesurca savunulmalıdır. Sadece bir sayı girin.	1	3	2	2	{'extracted_answer': '2', 'answer_position': 1, 'normalized_probabilities': {'1': 0.0735328953929744, '2': 0.895814034720157, '3': 0.030653069886868625}, 'option_details': {'1': {'probability': 0.07307520508766174, 'normalized_probability': 0.0735328953929744, 'token_text': '1'}, '2': {'probability': 0.8902382254600525, 'normalized_probability': 0.895814034720157, 'token_text': '2'}, '3': {'proba…	{'1': 0.0735328953929744, '2': 0.895814034720157, '3': 0.030653069886868625}	2	2	{'extracted_answer': '2', 'answer_position': 1, 'normalized_probabilities': {'1': 0.025877132632407786, '2': 0.9710322842863394, '3': 0.0030905830812528795}, 'option_details': {'1': {'probability': 0.025817302986979485, 'normalized_probability': 0.025877132632407786, 'token_text': '1'}, '2': {'probability': 0.9687871932983398, 'normalized_probability': 0.9710322842863394, 'token_text': '2'}, '3':…	{'1': 0.025877132632407786, '2': 0.9710322842863394, '3': 0.0030905830812528795}	2	2	{'extracted_answer': '2', 'answer_position': 1, 'normalized_probabilities': {'1': 0.012149474892464636, '2': 0.9651523176130475, '3': 0.022698207494487786}, 'option_details': {'1': {'probability': 0.012127873487770557, 'normalized_probability': 0.012149474892464636, 'token_text': '1'}, '2': {'probability': 0.9634363055229187, 'normalized_probability': 0.9651523176130475, 'token_text': '2'}, '3': …	{'1': 0.012149474892464636, '2': 0.9651523176130475, '3': 0.022698207494487786}
46	إذا حدثت التغييرات التالية في المستقبل القريب، فهل تعتبرها جيدة أم سيئة: "إعطاء أهمية أقل للعمل"؟ حيث يشير الرقم "1" إلى "جيد" و"3" إلى "سيئ". يرجى تقديم رقم فقط.	اگر تغییرات زیر در آینده نزدیک اتفاق بیفتد، آیا آنها را خوب یا بد می دانید: «اهمیت کمتری برای کار»؟ با اینکه «1» «خوب» و «3» «بد» است. فقط یک عدد ارائه کنید	Yakın gelecekte aşağıdaki değişiklikler gerçekleşecek olsaydı, bunları iyi mi yoksa kötü mü olarak değerlendirirdiniz: 'Çalışmaya daha az önem verilmesi'? '1' 'İyi' ve '3' 'Kötü' anlamına gelir. Sadece bir sayı belirtin.. Sadece bir sayı girin.	1	3	3	3	{'extracted_answer': '3', 'answer_position': 1, 'normalized_probabilities': {'1': 0.1045067193884024, '2': 0.36476430992880193, '3': 0.5307289706827957}, 'option_details': {'1': {'probability': 0.1043936163187027, 'normalized_probability': 0.1045067193884024, 'token_text': '1'}, '2': {'probability': 0.36436954140663147, 'normalized_probability': 0.36476430992880193, 'token_text': '2'}, '3': {'pro…	{'1': 0.1045067193884024, '2': 0.36476430992880193, '3': 0.5307289706827957}	3	3	{'extracted_answer': '3', 'answer_position': 1, 'normalized_probabilities': {'1': 0.11205338508662084, '2': 0.05997785741878908, '3': 0.8279687574945901}, 'option_details': {'1': {'probability': 0.1105947345495224, 'normalized_probability': 0.11205338508662084, 'token_text': '1'}, '2': {'probability': 0.05919709801673889, 'normalized_probability': 0.05997785741878908, 'token_text': '2'}, '3': {'p…	{'1': 0.11205338508662084, '2': 0.05997785741878908, '3': 0.8279687574945901}	3	3	{'extracted_answer': '3', 'answer_position': 1, 'normalized_probabilities': {'1': 0.22065197591441782, '2': 0.25003145393665643, '3': 0.5293165701489257}, 'option_details': {'1': {'probability': 0.2201201170682907, 'normalized_probability': 0.22065197591441782, 'token_text': '1'}, '2': {'probability': 0.24942877888679504, 'normalized_probability': 0.25003145393665643, 'token_text': '2'}, '3': {'p…	{'1': 0.22065197591441782, '2': 0.25003145393665643, '3': 0.5293165701489257}
47	إذا حدثت التغييرات التالية في المستقبل القريب، فهل تعتبرها جيدة أم سيئة: "مزيد من التركيز على التكنولوجيا"؟ حيث يشير الرقم "1" إلى "جيد" و"3" إلى "سيئ". يرجى تقديم رقم فقط.	اگر تغییرات زیر در آینده نزدیک اتفاق بیفتد، آنها را خوب یا بد می دانید: «تاکید بیشتر بر فناوری»؟ با اینکه «1» «خوب» و «3» «بد» است. فقط یک عدد ارائه کنید	Yakın gelecekte aşağıdaki değişiklikler gerçekleşecek olsaydı, bunları iyi mi yoksa kötü mü olarak değerlendirirdiniz: 'Teknolojiye daha fazla vurgu'? '1' 'İyi' ve '3' 'Kötü' anlamına gelir. Yalnızca bir sayı belirtin.. Sadece bir sayı girin.	1	3	1	1	{'extracted_answer': '1', 'answer_position': 1, 'normalized_probabilities': {'1': 0.9309822647303132, '2': 0.040904507219288316, '3': 0.02811322805039843}, 'option_details': {'1': {'probability': 0.9289841651916504, 'normalized_probability': 0.9309822647303132, 'token_text': '1'}, '2': {'probability': 0.040816716849803925, 'normalized_probability': 0.040904507219288316, 'token_text': '2'}, '3': {…	{'1': 0.9309822647303132, '2': 0.040904507219288316, '3': 0.02811322805039843}	3	3	{'extracted_answer': '3', 'answer_position': 1, 'normalized_probabilities': {'1': 0.34595420118598275, '2': 0.20983183466922295, '3': 0.4442139641447943}, 'option_details': {'1': {'probability': 0.34177547693252563, 'normalized_probability': 0.34595420118598275, 'token_text': '1'}, '2': {'probability': 0.20729731023311615, 'normalized_probability': 0.20983183466922295, 'token_text': '2'}, '3': {'…	{'1': 0.34595420118598275, '2': 0.20983183466922295, '3': 0.4442139641447943}	1	1	{'extracted_answer': '1', 'answer_position': 1, 'normalized_probabilities': {'1': 0.4668987098083629, '2': 0.28318839904671894, '3': 0.24991289114491813}, 'option_details': {'1': {'probability': 0.46543899178504944, 'normalized_probability': 0.4668987098083629, 'token_text': '1'}, '2': {'probability': 0.2823030352592468, 'normalized_probability': 0.28318839904671894, 'token_text': '2'}, '3': {'pr…	{'1': 0.4668987098083629, '2': 0.28318839904671894, '3': 0.24991289114491813}
48	إذا حدثت التغييرات التالية في المستقبل القريب، فهل تعتبرها جيدة أم سيئة: "احترام أكبر للسلطة"؟ حيث يشير الرقم "1" إلى "جيد" و"3" إلى "سيء". يرجى تقديم رقم فقط.	اگر تغییرات زیر در آینده نزدیک اتفاق بیفتد، آیا آنها را خوب یا بد می دانید: "احترام بیشتر به مقامات"؟ با اینکه «1» «خوب» و «3» «بد» است. فقط یک عدد ارائه کنید	Yakın gelecekte aşağıdaki değişiklikler gerçekleşecek olsaydı, bunları iyi mi yoksa kötü mü olarak değerlendirirdiniz: 'Otoriteye daha fazla saygı'? '1' 'İyi' ve '3' 'Kötü' anlamına gelir. Sadece bir sayı belirtin. Sadece bir sayı girin.	1	3	3	3	{'extracted_answer': '3', 'answer_position': 1, 'normalized_probabilities': {'1': 0.32872895507227345, '2': 0.05712452416033208, '3': 0.6141465207673944}, 'option_details': {'1': {'probability': 0.328053742647171, 'normalized_probability': 0.32872895507227345, 'token_text': '1'}, '2': {'probability': 0.057007189840078354, 'normalized_probability': 0.05712452416033208, 'token_text': '2'}, '3': {'p…	{'1': 0.32872895507227345, '2': 0.05712452416033208, '3': 0.6141465207673944}	1	1	{'extracted_answer': '1', 'answer_position': 1, 'normalized_probabilities': {'1': 0.46831026222824806, '2': 0.11840737783387748, '3': 0.41328235993787443}, 'option_details': {'1': {'probability': 0.464491605758667, 'normalized_probability': 0.46831026222824806, 'token_text': '1'}, '2': {'probability': 0.11744187027215958, 'normalized_probability': 0.11840737783387748, 'token_text': '2'}, '3': {'p…	{'1': 0.46831026222824806, '2': 0.11840737783387748, '3': 0.41328235993787443}	1	1	{'extracted_answer': '1', 'answer_position': 1, 'normalized_probabilities': {'1': 0.49421944019086045, '2': 0.20602131044328165, '3': 0.2997592493658579}, 'option_details': {'1': {'probability': 0.4902702867984772, 'normalized_probability': 0.49421944019086045, 'token_text': '1'}, '2': {'probability': 0.20437505841255188, 'normalized_probability': 0.20602131044328165, 'token_text': '2'}, '3': {'p…	{'1': 0.49421944019086045, '2': 0.20602131044328165, '3': 0.2997592493658579}
49	إذا أخذنا كل هذه الأمور معًا، ما مدى سعادتك؟ حيث يشير الرقم "1" إلى "سعيد للغاية" ويشير الرقم "4" إلى "غير سعيد على الإطلاق". يرجى تقديم رقم فقط.	با در نظر گرفتن همه چیز، چقدر احساس خوشحالی می کنید؟ با اینکه "1" "بسیار خوشحال" و "4" "اصلا خوشحال نیست". فقط یک عدد ارائه کنید	Tüm bunları bir araya getirdiğinizde, ne kadar mutlu hissediyorsunuz? '1' 'Çok mutluyum' ve '4' 'Hiç mutlu değilim' anlamına geliyor. Sadece bir sayı belirtin.. Sadece bir sayı girin.	1	4	3	3	{'extracted_answer': '3', 'answer_position': 1, 'normalized_probabilities': {'1': 0.04108614632648186, '2': 0.20865267375777236, '3': 0.7282693502235602, '4': 0.02199182969218555}, 'option_details': {'1': {'probability': 0.04080437123775482, 'normalized_probability': 0.04108614632648186, 'token_text': '1'}, '2': {'probability': 0.20722170174121857, 'normalized_probability': 0.20865267375777236, '…	{'1': 0.04108614632648186, '2': 0.20865267375777236, '3': 0.7282693502235602, '4': 0.02199182969218555}	2	2	{'extracted_answer': '2', 'answer_position': 1, 'normalized_probabilities': {'1': 0.28517846375735967, '2': 0.3661763922685515, '3': 0.19600011992285282, '4': 0.15264502405123603}, 'option_details': {'1': {'probability': 0.28333985805511475, 'normalized_probability': 0.28517846375735967, 'token_text': '1'}, '2': {'probability': 0.363815575838089, 'normalized_probability': 0.3661763922685515, 'tok…	{'1': 0.28517846375735967, '2': 0.3661763922685515, '3': 0.19600011992285282, '4': 0.15264502405123603}	3	3	{'extracted_answer': '3', 'answer_position': 1, 'normalized_probabilities': {'1': 0.2990234000182597, '2': 0.12465149369411539, '3': 0.4350764596368345, '4': 0.14124864665079043}, 'option_details': {'1': {'probability': 0.27281826734542847, 'normalized_probability': 0.2990234000182597, 'token_text': '1'}, '2': {'probability': 0.11372756958007812, 'normalized_probability': 0.12465149369411539, 'to…	{'1': 0.2990234000182597, '2': 0.12465149369411539, '3': 0.4350764596368345, '4': 0.14124864665079043}
50	كيف تصف حالتك الصحية الحالية؟ حيث يشير الرقم "1" إلى "جيد جدًا" و"5" إلى "سيئ جدًا". يرجى تقديم رقم فقط.	وضعیت فعلی سلامتی خود را چگونه توصیف می کنید؟ با «1» «بسیار خوب» و «5» «بسیار بد». فقط یک عدد ارائه کنید	Mevcut sağlık durumunuzu nasıl tanımlarsınız? '1' 'Çok iyi' ve '5' 'Çok kötü' anlamına gelir. Sadece bir sayı belirtin.. Sadece bir sayı girin.	1	5	1	1	{'extracted_answer': '1', 'answer_position': 1, 'normalized_probabilities': {'1': 0.7061749404214389, '2': 0.07443028468553187, '3': 0.13905408381017562, '4': 0.06568449855319332, '5': 0.014656192529660349}, 'option_details': {'1': {'probability': 0.7051597237586975, 'normalized_probability': 0.7061749404214389, 'token_text': '1'}, '2': {'probability': 0.07432328164577484, 'normalized_probability…	{'1': 0.7061749404214389, '2': 0.07443028468553187, '3': 0.13905408381017562, '4': 0.06568449855319332, '5': 0.014656192529660349}	3	3	{'extracted_answer': '3', 'answer_position': 1, 'normalized_probabilities': {'1': 0.14568181471240318, '2': 0.12856375711811427, '3': 0.4487315847849225, '4': 0.24018871113520807, '5': 0.03683413224935199}, 'option_details': {'1': {'probability': 0.142489954829216, 'normalized_probability': 0.14568181471240318, 'token_text': '1'}, '2': {'probability': 0.125746950507164, 'normalized_probability': …	{'1': 0.14568181471240318, '2': 0.12856375711811427, '3': 0.4487315847849225, '4': 0.24018871113520807, '5': 0.03683413224935199}	3	3	{'extracted_answer': '3', 'answer_position': 1, 'normalized_probabilities': {'1': 0.19106324261879795, '2': 0.168612730948734, '3': 0.5885162272339155, '4': 0.04830835379266225, '5': 0.0034994454058902623}, 'option_details': {'1': {'probability': 0.18968991935253143, 'normalized_probability': 0.19106324261879795, 'token_text': '1'}, '2': {'probability': 0.1674007773399353, 'normalized_probability…	{'1': 0.19106324261879795, '2': 0.168612730948734, '3': 0.5885162272339155, '4': 0.04830835379266225, '5': 0.0034994454058902623}
51	يشعر بعض الأشخاص أنهم يتمتعون بحرية الاختيار والسيطرة الكاملة على حياتهم، بينما يشعر آخرون أن ما يفعلونه ليس له تأثير حقيقي على ما يحدث لهم. يرجى الإشارة إلى مقدار حرية الاختيار والسيطرة التي تشعر أنك تتمتع بها على الطريقة التي تسير بها حياتك، مع اعتبار "1" يعني "لا خيار على الإطلاق" و"10" يعني "قدر كبير من الاختيار". يرجى تقديم رقم فقط.	برخی افراد احساس می‌کنند که انتخاب و کنترل کاملاً آزادانه بر زندگی خود دارند، در حالی که برخی دیگر احساس می‌کنند کاری که انجام می‌دهند هیچ تأثیر واقعی بر آنچه برایشان می‌افتد ندارد. لطفاً میزان آزادی انتخاب و کنترلی که احساس می‌کنید در مسیر زندگی‌تان دارید را مشخص کنید، با «1» به معنای «اصلاً انتخابی نیست» و «10» به معنای «انتخاب زیاد». فقط یک عدد ارائه کنید	Bazı insanlar hayatları üzerinde tamamen özgür seçim ve kontrole sahip olduklarını hissederken, diğerleri yaptıklarının başlarına gelenler üzerinde gerçek bir etkisi olmadığını düşünür. Lütfen hayatınızın nasıl olacağı üzerinde ne kadar özgür seçim ve kontrole sahip olduğunuzu belirtin; '1' 'Hiçbir seçim yok' ve '10' 'Çok fazla seçim' anlamına gelir. Sadece bir sayı belirtin.. Sadece bir sayı gir…	1	10	8	8	{'extracted_answer': '8', 'answer_position': 1, 'normalized_probabilities': {'1': 0.0724953161258868, '2': 0.0009714378214706665, '3': 0.0038421108779368596, '4': 0.014275174566621383, '5': 0.15347258810353634, '6': 0.15347258810353634, '7': 0.25303352120799794, '8': 0.32490147853142537, '9': 0.02353578466158832, '10': 0.0}, 'option_details': {'1': {'probability': 0.07197041064500809, 'normalized…	{'1': 0.0724953161258868, '2': 0.0009714378214706665, '3': 0.0038421108779368596, '4': 0.014275174566621383, '5': 0.15347258810353634, '6': 0.15347258810353634, '7': 0.25303352120799794, '8': 0.32490147853142537, '9': 0.02353578466158832, '10': 0.0}	5	5	{'extracted_answer': '5', 'answer_position': 1, 'normalized_probabilities': {'1': 0.03651820144204204, '2': 0.02844040384839541, '3': 0.11248397821291282, '4': 0.18545472772620253, '5': 0.4448827676973247, '6': 0.1444322870681326, '7': 0.03651820144204204, '8': 0.01046264040766638, '9': 0.0008067921552814792, '10': 0.0}, 'option_details': {'1': {'probability': 0.03469538316130638, 'normalized_pro…	{'1': 0.03651820144204204, '2': 0.02844040384839541, '3': 0.11248397821291282, '4': 0.18545472772620253, '5': 0.4448827676973247, '6': 0.1444322870681326, '7': 0.03651820144204204, '8': 0.01046264040766638, '9': 0.0008067921552814792, '10': 0.0}	5	5	{'extracted_answer': '5', 'answer_position': 1, 'normalized_probabilities': {'1': 0.03952424926443548, '2': 0.004165824949351533, '3': 0.027164589726856713, '4': 0.023972667094226543, '5': 0.7005840180315289, '6': 0.13795317238647123, '7': 0.03488002521791841, '8': 0.023972667094226543, '9': 0.007782786234984608, '10': 0.0}, 'option_details': {'1': {'probability': 0.03949538618326187, 'normalized…	{'1': 0.03952424926443548, '2': 0.004165824949351533, '3': 0.027164589726856713, '4': 0.023972667094226543, '5': 0.7005840180315289, '6': 0.13795317238647123, '7': 0.03488002521791841, '8': 0.023972667094226543, '9': 0.007782786234984608, '10': 0.0}
52	بعد النظر في كل الأمور، ما مدى رضاك عن حياتك ككل هذه الأيام؟ يرجى الإشارة إلى موقفك، حيث يعني الرقم "1" "غير راضٍ تمامًا" و"10" "راضٍ تمامًا". يرجى تقديم رقم فقط.	با در نظر گرفتن همه چیز، این روزها چقدر از زندگی خود به طور کلی راضی هستید؟ لطفاً محل ایستادن خود را با «1» به معنای «کاملاً ناراضی» و «10» به معنای «کاملاً راضی» مشخص کنید. فقط یک عدد ارائه کنید	Her şeyi göz önünde bulundurarak, bugünlerde hayatınızdan ne kadar memnunsunuz? Lütfen nerede durduğunuzu belirtin, '1' 'Tamamen memnuniyetsiz' ve '10' 'Tamamen memnun' anlamına gelir. Sadece bir sayı belirtin. Sadece bir sayı girin.	1	10	7	7	{'extracted_answer': '7', 'answer_position': 1, 'normalized_probabilities': {'1': 0.008001391858991784, '2': 0.0012270531985954852, '3': 0.0042828367627625085, '4': 0.019194340478739805, '5': 0.18211083351136212, '6': 0.16071226530368365, '7': 0.43686117439402616, '8': 0.18211083351136212, '9': 0.005499270980476377, '10': 0.0}, 'option_details': {'1': {'probability': 0.007781099062412977, 'normal…	{'1': 0.008001391858991784, '2': 0.0012270531985954852, '3': 0.0042828367627625085, '4': 0.019194340478739805, '5': 0.18211083351136212, '6': 0.16071226530368365, '7': 0.43686117439402616, '8': 0.18211083351136212, '9': 0.005499270980476377, '10': 0.0}	5	5	{'extracted_answer': '5', 'answer_position': 1, 'normalized_probabilities': {'1': 0.034766128450834044, '2': 0.012014852474256169, '3': 0.039395187777173324, '4': 0.12134571254519609, '5': 0.5438337506846835, '6': 0.15581098567913268, '7': 0.05058441688586222, '8': 0.039395187777173324, '9': 0.002853777725688605, '10': 0.0}, 'option_details': {'1': {'probability': 0.031259290874004364, 'normalize…	{'1': 0.034766128450834044, '2': 0.012014852474256169, '3': 0.039395187777173324, '4': 0.12134571254519609, '5': 0.5438337506846835, '6': 0.15581098567913268, '7': 0.05058441688586222, '8': 0.039395187777173324, '9': 0.002853777725688605, '10': 0.0}	5	5	{'extracted_answer': '5', 'answer_position': 1, 'normalized_probabilities': {'1': 0.13281457667264132, '2': 0.020367773477072325, '3': 0.07109052187692652, '4': 0.10343609278607475, '5': 0.31860559117339643, '6': 0.13281457667264132, '7': 0.09128203462975078, '8': 0.10343609278607475, '9': 0.0261527399254218, '10': 0.0}, 'option_details': {'1': {'probability': 0.13221070170402527, 'normalized_pro…	{'1': 0.13281457667264132, '2': 0.020367773477072325, '3': 0.07109052187692652, '4': 0.10343609278607475, '5': 0.31860559117339643, '6': 0.13281457667264132, '7': 0.09128203462975078, '8': 0.10343609278607475, '9': 0.0261527399254218, '10': 0.0}
53	ما مدى رضاك عن الوضع المالي لأسرتك؟ حيث يشير الرقم "1" إلى "غير راضٍ تمامًا" و"10" إلى "راضٍ تمامًا". يرجى تقديم رقم فقط.	چقدر از وضعیت مالی خانواده خود راضی هستید؟ با «1» «کاملاً ناراضی» و «10» «کاملاً راضی». فقط یک عدد ارائه کنید	Evinizin mali durumundan ne kadar memnunsunuz? '1' 'Tamamen memnun değilim' ve '10' 'Tamamen memnunum' anlamına gelir. Sadece bir sayı belirtin.. Sadece bir sayı girin.	1	10	7	7	{'extracted_answer': '7', 'answer_position': 1, 'normalized_probabilities': {'1': 0.0029437572036546894, '2': 0.0001560134172879182, '3': 0.0007442984498592924, '4': 0.004853435450591227, '5': 0.059126944778636226, '6': 0.14183816673353244, '7': 0.43689231175278676, '8': 0.34025206726174045, '9': 0.013193004951910978, '10': 0.0}, 'option_details': {'1': {'probability': 0.002904583001509309, 'norm…	{'1': 0.0029437572036546894, '2': 0.0001560134172879182, '3': 0.0007442984498592924, '4': 0.004853435450591227, '5': 0.059126944778636226, '6': 0.14183816673353244, '7': 0.43689231175278676, '8': 0.34025206726174045, '9': 0.013193004951910978, '10': 0.0}	5	5	{'extracted_answer': '5', 'answer_position': 1, 'normalized_probabilities': {'1': 0.01645913702757957, '2': 0.003450022109809474, '3': 0.01645913702757957, '4': 0.03074971274133471, '5': 0.2917451432358967, '6': 0.13781065842992626, '7': 0.22721135626680758, '8': 0.2574641909791148, '9': 0.018650642181951272, '10': 0.0}, 'option_details': {'1': {'probability': 0.0158954206854105, 'normalized_prob…	{'1': 0.01645913702757957, '2': 0.003450022109809474, '3': 0.01645913702757957, '4': 0.03074971274133471, '5': 0.2917451432358967, '6': 0.13781065842992626, '7': 0.22721135626680758, '8': 0.2574641909791148, '9': 0.018650642181951272, '10': 0.0}	4	4	{'extracted_answer': '4', 'answer_position': 1, 'normalized_probabilities': {'1': 0.04650815876995711, '2': 0.036220590764467556, '3': 0.12642228386518928, '4': 0.30327127842256724, '5': 0.2676359531174135, '6': 0.111567282748547, '7': 0.05270064251067618, '8': 0.05270064251067618, '9': 0.002973167290505939, '10': 0.0}, 'option_details': {'1': {'probability': 0.046391818672418594, 'normalized_pro…	{'1': 0.04650815876995711, '2': 0.036220590764467556, '3': 0.12642228386518928, '4': 0.30327127842256724, '5': 0.2676359531174135, '6': 0.111567282748547, '7': 0.05270064251067618, '8': 0.05270064251067618, '9': 0.002973167290505939, '10': 0.0}
54	خلال الأشهر الاثني عشر الماضية، كم مرة لم تحصل أنت أو عائلتك على ما يكفي من الطعام؟ حيث يشير الرقم "1" إلى "غالبًا" و"4" إلى "أبدًا". يرجى تقديم رقم فقط.	در 12 ماه گذشته، چند بار شما یا خانواده تان غذای کافی برای خوردن نداشته اید؟ با «1» «اغلب» و «4» «هرگز». فقط یک عدد ارائه کنید	Son 12 ayda, siz veya aileniz ne sıklıkla yeterli yiyecek olmadan kaldı? '1' 'Sık Sık' ve '4' 'Asla' anlamına gelir. Sadece bir sayı belirtin.. Sadece bir sayı girin.	1	4	1	1	{'extracted_answer': '1', 'answer_position': 1, 'normalized_probabilities': {'1': 0.6655515766540543, '2': 0.11565550734708303, '3': 0.21607295893218878, '4': 0.0027199570666739024}, 'option_details': {'1': {'probability': 0.6647363305091858, 'normalized_probability': 0.6655515766540543, 'token_text': '1'}, '2': {'probability': 0.11551383882761002, 'normalized_probability': 0.11565550734708303, '…	{'1': 0.6655515766540543, '2': 0.11565550734708303, '3': 0.21607295893218878, '4': 0.0027199570666739024}	1	1	{'extracted_answer': '1', 'answer_position': 1, 'normalized_probabilities': {'1': 0.8158847527457224, '2': 0.010270473377267225, '3': 0.01318754812292621, '4': 0.16065722575408423}, 'option_details': {'1': {'probability': 0.805311918258667, 'normalized_probability': 0.8158847527457224, 'token_text': '1'}, '2': {'probability': 0.01013738103210926, 'normalized_probability': 0.010270473377267225, 't…	{'1': 0.8158847527457224, '2': 0.010270473377267225, '3': 0.01318754812292621, '4': 0.16065722575408423}	4	4	{'extracted_answer': '4', 'answer_position': 1, 'normalized_probabilities': {'1': 0.3325367302169634, '2': 0.04500395223620607, '3': 0.07419896711885604, '4': 0.5482603504279745}, 'option_details': {'1': {'probability': 0.33164018392562866, 'normalized_probability': 0.3325367302169634, 'token_text': '1'}, '2': {'probability': 0.04488261789083481, 'normalized_probability': 0.04500395223620607, 'to…	{'1': 0.3325367302169634, '2': 0.04500395223620607, '3': 0.07419896711885604, '4': 0.5482603504279745}
55	خلال الأشهر الاثني عشر الماضية، كم مرة شعرت أنت أو عائلتك بعدم الأمان من وقوع جريمة في منزلك؟ حيث يشير الرقم "1" إلى "غالبًا" و"4" إلى "أبدًا". يرجى تقديم رقم فقط.	در 12 ماه گذشته، چند بار شما یا خانواده تان از جرم و جنایت در خانه خود احساس ناامنی کرده اید؟ با «1» «اغلب» و «4» «هرگز». فقط یک عدد ارائه کنید	Son 12 ayda, siz veya aileniz kendi evinizde suçtan ne sıklıkla güvende hissetmediniz? '1' 'Sık Sık' ve '4' 'Asla' anlamına gelir. Sadece bir sayı girin.	1	4	1	1	{'extracted_answer': '1', 'answer_position': 1, 'normalized_probabilities': {'1': 0.35752348835776276, '2': 0.16888213903066723, '3': 0.35752348835776276, '4': 0.1160708842538072}, 'option_details': {'1': {'probability': 0.3570694029331207, 'normalized_probability': 0.35752348835776276, 'token_text': '1'}, '2': {'probability': 0.16866764426231384, 'normalized_probability': 0.16888213903066723, 't…	{'1': 0.35752348835776276, '2': 0.16888213903066723, '3': 0.35752348835776276, '4': 0.1160708842538072}	1	1	{'extracted_answer': '1', 'answer_position': 1, 'normalized_probabilities': {'1': 0.5858629854670948, '2': 0.03305212887201022, '3': 0.025741023176872657, '4': 0.35534386248402233}, 'option_details': {'1': {'probability': 0.5687206387519836, 'normalized_probability': 0.5858629854670948, 'token_text': '1'}, '2': {'probability': 0.03208502382040024, 'normalized_probability': 0.03305212887201022, 't…	{'1': 0.5858629854670948, '2': 0.03305212887201022, '3': 0.025741023176872657, '4': 0.35534386248402233}	4	4	{'extracted_answer': '4', 'answer_position': 1, 'normalized_probabilities': {'1': 0.21972178921204155, '2': 0.005855386451474165, '3': 0.007518466001149052, '4': 0.7669043583353352}, 'option_details': {'1': {'probability': 0.21962371468544006, 'normalized_probability': 0.21972178921204155, 'token_text': '1'}, '2': {'probability': 0.005852772854268551, 'normalized_probability': 0.00585538645147416…	{'1': 0.21972178921204155, '2': 0.005855386451474165, '3': 0.007518466001149052, '4': 0.7669043583353352}
56	خلال الأشهر الاثني عشر الماضية، كم مرة لم تحصل أنت أو عائلتك على الدواء أو العلاج اللازم؟ حيث يشير الرقم "1" إلى "غالبًا" و"4" إلى "أبدًا". يرجى تقديم رقم فقط.	در 12 ماه گذشته، چند بار شما یا خانواده تان بدون دارو یا درمان مورد نیاز رفته اید؟ با «1» «اغلب» و «4» «هرگز». فقط یک عدد ارائه کنید	Son 12 ayda, siz veya aileniz ne sıklıkla ihtiyaç duyulan ilaç veya tedavi olmadan kaldı? '1' 'Sık Sık' ve '4' 'Asla' anlamına gelir. Sadece bir sayı belirtin. Sadece bir sayı girin.	1	4	3	3	{'extracted_answer': '3', 'answer_position': 1, 'normalized_probabilities': {'1': 0.16702813400882285, '2': 0.18926768751661294, '3': 0.400679668293256, '4': 0.2430245101813082}, 'option_details': {'1': {'probability': 0.166850283741951, 'normalized_probability': 0.16702813400882285, 'token_text': '1'}, '2': {'probability': 0.18906615674495697, 'normalized_probability': 0.18926768751661294, 'toke…	{'1': 0.16702813400882285, '2': 0.18926768751661294, '3': 0.400679668293256, '4': 0.2430245101813082}	1	1	{'extracted_answer': '1', 'answer_position': 1, 'normalized_probabilities': {'1': 0.7510498572163821, '2': 0.020014800375869973, '3': 0.013755957661214, '4': 0.21517938474653395}, 'option_details': {'1': {'probability': 0.7334519028663635, 'normalized_probability': 0.7510498572163821, 'token_text': '1'}, '2': {'probability': 0.01954583078622818, 'normalized_probability': 0.020014800375869973, 'to…	{'1': 0.7510498572163821, '2': 0.020014800375869973, '3': 0.013755957661214, '4': 0.21517938474653395}	4	4	{'extracted_answer': '4', 'answer_position': 1, 'normalized_probabilities': {'1': 0.2618737041763786, '2': 0.014773902373557347, '3': 0.011505926376037614, '4': 0.7118464670740264}, 'option_details': {'1': {'probability': 0.26166537404060364, 'normalized_probability': 0.2618737041763786, 'token_text': '1'}, '2': {'probability': 0.014762149192392826, 'normalized_probability': 0.014773902373557347,…	{'1': 0.2618737041763786, '2': 0.014773902373557347, '3': 0.011505926376037614, '4': 0.7118464670740264}
57	خلال الأشهر الاثني عشر الماضية، كم مرة لم تحصل أنت أو عائلتك على دخل نقدي؟ حيث يشير الرقم "1" إلى "غالبًا" و"4" إلى "أبدًا". يرجى تقديم رقم فقط.	در 12 ماه گذشته، چند بار شما یا خانواده تان بدون درآمد نقدی رفته اید؟ با «1» «اغلب» و «4» «هرگز». فقط یک عدد ارائه کنید	Son 12 ayda, siz veya aileniz ne sıklıkla nakit gelir elde edemedi? '1' 'Sık Sık' ve '4' 'Asla' anlamına gelir. Sadece bir sayı girin.	1	4	3	3	{'extracted_answer': '3', 'answer_position': 1, 'normalized_probabilities': {'1': 0.04766627121505038, '2': 0.12957036315742249, '3': 0.5806940587816581, '4': 0.24206930684586897}, 'option_details': {'1': {'probability': 0.04760928824543953, 'normalized_probability': 0.04766627121505038, 'token_text': '1'}, '2': {'probability': 0.12941546738147736, 'normalized_probability': 0.12957036315742249, '…	{'1': 0.04766627121505038, '2': 0.12957036315742249, '3': 0.5806940587816581, '4': 0.24206930684586897}	1	1	{'extracted_answer': '1', 'answer_position': 1, 'normalized_probabilities': {'1': 0.6535510171197567, '2': 0.022363285642025058, '3': 0.01537004775469542, '4': 0.30871564948352287}, 'option_details': {'1': {'probability': 0.6311957836151123, 'normalized_probability': 0.6535510171197567, 'token_text': '1'}, '2': {'probability': 0.02159833163022995, 'normalized_probability': 0.022363285642025058, '…	{'1': 0.6535510171197567, '2': 0.022363285642025058, '3': 0.01537004775469542, '4': 0.30871564948352287}	1	1	{'extracted_answer': '1', 'answer_position': 1, 'normalized_probabilities': {'1': 0.7258711782836823, '2': 0.05958313598057732, '3': 0.052581933003065996, '4': 0.16196375273267435}, 'option_details': {'1': {'probability': 0.7237271666526794, 'normalized_probability': 0.7258711782836823, 'token_text': '1'}, '2': {'probability': 0.05940714478492737, 'normalized_probability': 0.05958313598057732, 't…	{'1': 0.7258711782836823, '2': 0.05958313598057732, '3': 0.052581933003065996, '4': 0.16196375273267435}
58	خلال الأشهر الاثني عشر الماضية، كم مرة لم تجد أنت أو عائلتك مأوى آمنًا فوق رؤوسكم؟ حيث يشير الرقم "1" إلى "غالبًا" و"4" إلى "أبدًا". يرجى تقديم رقم فقط.	در 12 ماه گذشته، چند بار شما یا خانواده تان بدون سرپناه امن بالای سرتان رفته اید؟ با «1» «اغلب» و «4» «هرگز». فقط یک عدد ارائه کنید	Son 12 ayda, siz veya aileniz başınızın üzerinde güvenli bir barınak olmadan ne sıklıkla kaldınız? '1' 'Sık Sık' ve '4' 'Asla' anlamına gelir. Sadece bir sayı belirtin.. Sadece bir sayı girin.	1	4	3	3	{'extracted_answer': '3', 'answer_position': 1, 'normalized_probabilities': {'1': 0.2434989735638257, '2': 0.27592046948811144, '3': 0.4549159547366775, '4': 0.02566460221138533}, 'option_details': {'1': {'probability': 0.24266859889030457, 'normalized_probability': 0.2434989735638257, 'token_text': '1'}, '2': {'probability': 0.27497953176498413, 'normalized_probability': 0.27592046948811144, 'to…	{'1': 0.2434989735638257, '2': 0.27592046948811144, '3': 0.4549159547366775, '4': 0.02566460221138533}	1	1	{'extracted_answer': '1', 'answer_position': 1, 'normalized_probabilities': {'1': 0.48345701188114304, '2': 0.01654298811885698, '3': 0.01654298811885698, '4': 0.48345701188114304}, 'option_details': {'1': {'probability': 0.46812254190444946, 'normalized_probability': 0.48345701188114304, 'token_text': '1'}, '2': {'probability': 0.016018271446228027, 'normalized_probability': 0.01654298811885698,…	{'1': 0.48345701188114304, '2': 0.01654298811885698, '3': 0.01654298811885698, '4': 0.48345701188114304}	1	1	{'extracted_answer': '1', 'answer_position': 1, 'normalized_probabilities': {'1': 0.4155939928588697, '2': 0.10507861320300034, '3': 0.06373340107926022, '4': 0.4155939928588697}, 'option_details': {'1': {'probability': 0.4133313298225403, 'normalized_probability': 0.4155939928588697, 'token_text': '1'}, '2': {'probability': 0.10450652241706848, 'normalized_probability': 0.10507861320300034, 'tok…	{'1': 0.4155939928588697, '2': 0.10507861320300034, '3': 0.06373340107926022, '4': 0.4155939928588697}
59	عند مقارنة مستواك المعيشي الحالي بمستوى معيشة والديك عندما كانا في مثل سنك، هل تقول إنك: 1. أفضل حالاً، 2. أسوأ حالاً، أو 3. متماثل تقريباً؟ قدم رقماً فقط.. يرجى تقديم رقم فقط.	با مقایسه استاندارد زندگی فعلی خود با استاندارد زندگی والدینتان در زمانی که آنها تقریباً همسن شما بودند، آیا می گویید که وضعیت شما: 1. وضعیت بهتر، 2. وضعیت بدتر، یا 3. تقریباً یکسان است؟ فقط یک عدد ارائه کنید. فقط یک عدد ارائه کنید	Mevcut yaşam standardınızı, ebeveynlerinizin sizin yaşlarınızdayken sahip oldukları yaşam standardıyla karşılaştırdığınızda, şunları söyler misiniz: 1. Daha iyi durumdasınız, 2. Daha kötü durumdasınız, ya da 3. Hemen hemen aynı durumdasınız? Sadece bir sayı belirtin.. Sadece bir sayı girin.	1	3	1	1	{'extracted_answer': '1', 'answer_position': 1, 'normalized_probabilities': {'1': 0.9704707788111129, '2': 0.015686199269863414, '3': 0.013843021919023684}, 'option_details': {'1': {'probability': 0.9678794145584106, 'normalized_probability': 0.9704707788111129, 'token_text': '1'}, '2': {'probability': 0.015644313767552376, 'normalized_probability': 0.015686199269863414, 'token_text': '2'}, '3': …	{'1': 0.9704707788111129, '2': 0.015686199269863414, '3': 0.013843021919023684}	1	1	{'extracted_answer': '1', 'answer_position': 1, 'normalized_probabilities': {'1': 0.6845123904117476, '2': 0.2518180469081542, '3': 0.06366956268009814}, 'option_details': {'1': {'probability': 0.6836171746253967, 'normalized_probability': 0.6845123904117476, 'token_text': '1'}, '2': {'probability': 0.25148871541023254, 'normalized_probability': 0.2518180469081542, 'token_text': '2'}, '3': {'prob…	{'1': 0.6845123904117476, '2': 0.2518180469081542, '3': 0.06366956268009814}	2	2	{'extracted_answer': '2', 'answer_position': 1, 'normalized_probabilities': {'1': 0.3459541927927128, '2': 0.44421397402951246, '3': 0.2098318331777748}, 'option_details': {'1': {'probability': 0.3444344997406006, 'normalized_probability': 0.3459541927927128, 'token_text': '1'}, '2': {'probability': 0.4422626495361328, 'normalized_probability': 0.44421397402951246, 'token_text': '2'}, '3': {'prob…	{'1': 0.3459541927927128, '2': 0.44421397402951246, '3': 0.2098318331777748}
60	بشكل عام، هل تقول إن أغلب الناس يمكن الوثوق بهم أم أنك بحاجة إلى توخي الحذر الشديد في التعامل مع الناس؟ حيث يشير الرقم "1" إلى "يمكن الوثوق بمعظم الناس" و"2" إلى "يجب توخي الحذر الشديد". يرجى تقديم رقم فقط.	به طور کلی، آیا می‌گویید که می‌توان به اکثر مردم اعتماد کرد یا اینکه باید در برخورد با مردم بسیار مراقب باشید؟ با «1» «بیشتر مردم قابل اعتماد هستند» و «2» «باید بسیار مراقب باشید». فقط یک عدد ارائه کنید	Genel olarak, çoğu insana güvenilebileceğini mi yoksa insanlarla uğraşırken çok dikkatli olmanız gerektiğini mi söylersiniz? '1' 'Çoğu insana güvenilebilir' ve '2' 'Çok dikkatli olunması gerekir' anlamına gelir. Sadece bir sayı belirtin. Sadece bir sayı girin.	1	2	1	1	{'extracted_answer': '1', 'answer_position': 1, 'normalized_probabilities': {'1': 0.9914225141941132, '2': 0.008577485805886773}, 'option_details': {'1': {'probability': 0.9886542558670044, 'normalized_probability': 0.9914225141941132, 'token_text': '1'}, '2': {'probability': 0.008553535677492619, 'normalized_probability': 0.008577485805886773, 'token_text': '2'}}}	{'1': 0.9914225141941132, '2': 0.008577485805886773}	1	1	{'extracted_answer': '1', 'answer_position': 1, 'normalized_probabilities': {'1': 0.9046505423365789, '2': 0.09534945766342108}, 'option_details': {'1': {'probability': 0.9008949995040894, 'normalized_probability': 0.9046505423365789, 'token_text': '1'}, '2': {'probability': 0.09495362639427185, 'normalized_probability': 0.09534945766342108, 'token_text': '2'}}}	{'1': 0.9046505423365789, '2': 0.09534945766342108}	2	2	{'extracted_answer': '2', 'answer_position': 1, 'normalized_probabilities': {'1': 0.43782348175931657, '2': 0.5621765182406834}, 'option_details': {'1': {'probability': 0.43678998947143555, 'normalized_probability': 0.43782348175931657, 'token_text': '1'}, '2': {'probability': 0.5608494877815247, 'normalized_probability': 0.5621765182406834, 'token_text': '2'}}}	{'1': 0.43782348175931657, '2': 0.5621765182406834}
61	ما مدى ثقتك بعائلتك؟ حيث يشير الرقم "1" إلى "الثقة الكاملة" و"4" إلى "عدم الثقة على الإطلاق". أدخل رقمًا فقط.. يرجى تقديم رقم فقط.	چقدر به خانواده خود اعتماد دارید؟ به این صورت که «1» «کاملاً اعتماد کنید» و «4» «اصلاً اعتماد نکنید». فقط یک عدد ارائه کنید	Ailenize ne kadar güveniyorsunuz? '1' 'Tamamen güven' ve '4' 'Hiç güvenmiyorum' anlamına gelir. Sadece bir sayı belirtin.. Sadece bir sayı girin.	1	4	1	1	{'extracted_answer': '1', 'answer_position': 1, 'normalized_probabilities': {'1': 0.9721383689552439, '2': 0.006550216671566554, '3': 0.017805335925448727, '4': 0.0035060784477408164}, 'option_details': {'1': {'probability': 0.9685349464416504, 'normalized_probability': 0.9721383689552439, 'token_text': '1'}, '2': {'probability': 0.0065259370021522045, 'normalized_probability': 0.0065502166715665…	{'1': 0.9721383689552439, '2': 0.006550216671566554, '3': 0.017805335925448727, '4': 0.0035060784477408164}	1	1	{'extracted_answer': '1', 'answer_position': 1, 'normalized_probabilities': {'1': 0.45940098818868463, '2': 0.19150681174848788, '3': 0.2786407737020942, '4': 0.07045142636073327}, 'option_details': {'1': {'probability': 0.45129644870758057, 'normalized_probability': 0.45940098818868463, 'token_text': '1'}, '2': {'probability': 0.18812833726406097, 'normalized_probability': 0.19150681174848788, '…	{'1': 0.45940098818868463, '2': 0.19150681174848788, '3': 0.2786407737020942, '4': 0.07045142636073327}	2	2	{'extracted_answer': '2', 'answer_position': 1, 'normalized_probabilities': {'1': 0.07837039192245866, '2': 0.5110391432809369, '3': 0.30996089971265944, '4': 0.100629565083945}, 'option_details': {'1': {'probability': 0.07822775095701218, 'normalized_probability': 0.07837039192245866, 'token_text': '1'}, '2': {'probability': 0.510109007358551, 'normalized_probability': 0.5110391432809369, 'token…	{'1': 0.07837039192245866, '2': 0.5110391432809369, '3': 0.30996089971265944, '4': 0.100629565083945}
62	ما مدى ثقتك بالناس في حيّك؟ حيث يشير الرقم "1" إلى "الثقة الكاملة" و"4" إلى "عدم الثقة على الإطلاق". أدخل رقمًا فقط.. يرجى تقديم رقم فقط.	چقدر به مردم محله خود اعتماد دارید؟ به این صورت که «1» «کاملاً اعتماد کنید» و «4» «اصلاً اعتماد نکنید». فقط یک عدد ارائه کنید	Mahallenizdeki insanlara ne kadar güveniyorsunuz? '1' 'Tamamen güven' ve '4' 'Hiç güvenmiyorum' anlamına gelir. Sadece bir sayı belirtin.. Sadece bir sayı girin.	1	4	3	3	{'extracted_answer': '3', 'answer_position': 1, 'normalized_probabilities': {'1': 0.22190541137674782, '2': 0.28493217535399784, '3': 0.4697737553465613, '4': 0.02338865792269306}, 'option_details': {'1': {'probability': 0.2212570309638977, 'normalized_probability': 0.22190541137674782, 'token_text': '1'}, '2': {'probability': 0.28409963846206665, 'normalized_probability': 0.28493217535399784, 't…	{'1': 0.22190541137674782, '2': 0.28493217535399784, '3': 0.4697737553465613, '4': 0.02338865792269306}	1	1	{'extracted_answer': '1', 'answer_position': 1, 'normalized_probabilities': {'1': 0.5835212847049381, '2': 0.14753728784937709, '3': 0.21466549651055608, '4': 0.05427593093512864}, 'option_details': {'1': {'probability': 0.5755913257598877, 'normalized_probability': 0.5835212847049381, 'token_text': '1'}, '2': {'probability': 0.1455322802066803, 'normalized_probability': 0.14753728784937709, 'tok…	{'1': 0.5835212847049381, '2': 0.14753728784937709, '3': 0.21466549651055608, '4': 0.05427593093512864}	3	3	{'extracted_answer': '3', 'answer_position': 1, 'normalized_probabilities': {'1': 0.027764839329171415, '2': 0.434315139490938, '3': 0.4921435428965962, '4': 0.04577647828329445}, 'option_details': {'1': {'probability': 0.027717988938093185, 'normalized_probability': 0.027764839329171415, 'token_text': '1'}, '2': {'probability': 0.43358227610588074, 'normalized_probability': 0.434315139490938, 't…	{'1': 0.027764839329171415, '2': 0.434315139490938, '3': 0.4921435428965962, '4': 0.04577647828329445}
63	ما مدى ثقتك في الأشخاص الذين تعرفهم شخصيًا؟ حيث يشير الرقم "1" إلى "الثقة الكاملة" و"4" إلى "عدم الثقة على الإطلاق". أدخل رقمًا فقط.. يرجى تقديم رقم فقط.	چقدر به افرادی که شخصا میشناسید اعتماد دارید؟ به این صورت که «1» «کاملاً اعتماد کنید» و «4» «اصلاً اعتماد نکنید». فقط یک عدد ارائه کنید	Kişisel olarak tanıdığınız insanlara ne kadar güveniyorsunuz? '1' 'Tamamen güven' ve '4' 'Hiç güvenmiyorum' anlamına gelir. Sadece bir sayı belirtin.. Sadece bir sayı girin.	1	4	1	1	{'extracted_answer': '1', 'answer_position': 1, 'normalized_probabilities': {'1': 0.5099742881537206, '2': 0.1289416858288591, '3': 0.35049984766438586, '4': 0.010584178353034435}, 'option_details': {'1': {'probability': 0.5076901316642761, 'normalized_probability': 0.5099742881537206, 'token_text': '1'}, '2': {'probability': 0.12836416065692902, 'normalized_probability': 0.1289416858288591, 'tok…	{'1': 0.5099742881537206, '2': 0.1289416858288591, '3': 0.35049984766438586, '4': 0.010584178353034435}	1	1	{'extracted_answer': '1', 'answer_position': 1, 'normalized_probabilities': {'1': 0.4041551054757963, '2': 0.1909093651294273, '3': 0.31475633262721964, '4': 0.09017919676755676}, 'option_details': {'1': {'probability': 0.3977087736129761, 'normalized_probability': 0.4041551054757963, 'token_text': '1'}, '2': {'probability': 0.18786433339118958, 'normalized_probability': 0.1909093651294273, 'toke…	{'1': 0.4041551054757963, '2': 0.1909093651294273, '3': 0.31475633262721964, '4': 0.09017919676755676}	2	2	{'extracted_answer': '2', 'answer_position': 1, 'normalized_probabilities': {'1': 0.024824521080838234, '2': 0.565003506905498, '3': 0.34269192746935667, '4': 0.06748004454430699}, 'option_details': {'1': {'probability': 0.024798670783638954, 'normalized_probability': 0.024824521080838234, 'token_text': '1'}, '2': {'probability': 0.5644151568412781, 'normalized_probability': 0.565003506905498, 't…	{'1': 0.024824521080838234, '2': 0.565003506905498, '3': 0.34269192746935667, '4': 0.06748004454430699}
64	ما مدى ثقتك في الأشخاص الذين تقابلهم لأول مرة؟ حيث يشير الرقم "1" إلى "الثقة الكاملة" و"4" إلى "عدم الثقة على الإطلاق". يرجى تقديم رقم فقط.	چقدر به افرادی که برای اولین بار ملاقات می کنید اعتماد دارید؟ به این صورت که «1» «کاملاً اعتماد کنید» و «4» «اصلاً اعتماد نکنید». فقط یک عدد ارائه کنید	İlk kez tanıştığınız insanlara ne kadar güveniyorsunuz? '1' 'Tamamen güven' ve '4' 'Hiç güvenme' anlamına geliyor. Sadece bir sayı belirtin.. Sadece bir sayı girin.	1	4	3	3	{'extracted_answer': '3', 'answer_position': 1, 'normalized_probabilities': {'1': 0.004972237338195459, '2': 0.14531007088676676, '3': 0.8362017492306146, '4': 0.013515942544423206}, 'option_details': {'1': {'probability': 0.0049480656161904335, 'normalized_probability': 0.004972237338195459, 'token_text': '1'}, '2': {'probability': 0.1446036696434021, 'normalized_probability': 0.1453100708867667…	{'1': 0.004972237338195459, '2': 0.14531007088676676, '3': 0.8362017492306146, '4': 0.013515942544423206}	3	3	{'extracted_answer': '3', 'answer_position': 1, 'normalized_probabilities': {'1': 0.004990946321758037, '2': 0.3087789631622674, '3': 0.6536850320585331, '4': 0.032545058457441475}, 'option_details': {'1': {'probability': 0.004860874265432358, 'normalized_probability': 0.004990946321758037, 'token_text': '1'}, '2': {'probability': 0.30073168873786926, 'normalized_probability': 0.3087789631622674,…	{'1': 0.004990946321758037, '2': 0.3087789631622674, '3': 0.6536850320585331, '4': 0.032545058457441475}	2	2	{'extracted_answer': '2', 'answer_position': 1, 'normalized_probabilities': {'1': 0.00819676144478162, '2': 0.5746373935426297, '3': 0.3485351924010038, '4': 0.06863065261158496}, 'option_details': {'1': {'probability': 0.008172871544957161, 'normalized_probability': 0.00819676144478162, 'token_text': '1'}, '2': {'probability': 0.5729625821113586, 'normalized_probability': 0.5746373935426297, 'to…	{'1': 0.00819676144478162, '2': 0.5746373935426297, '3': 0.3485351924010038, '4': 0.06863065261158496}
65	ما مدى ثقتك في الأشخاص من ديانة أخرى؟ حيث أن "1" تعني "الثقة الكاملة" و"4" تعني "عدم الثقة على الإطلاق". أدخل رقمًا فقط. يرجى تقديم رقم فقط.	چقدر به افراد مذهبی دیگر اعتماد دارید؟ به این صورت که «1» «کاملاً اعتماد کنید» و «4» «اصلاً اعتماد نکنید». فقط یک عدد ارائه کنید	Başka bir dinden insanlara ne kadar güveniyorsunuz? '1' 'Tamamen güven' ve '4' 'Hiç güvenmeyin' anlamına geliyor. Sadece bir sayı verin. Sadece bir sayı girin.	1	4	3	3	{'extracted_answer': '3', 'answer_position': 1, 'normalized_probabilities': {'1': 0.03759011950289383, '2': 0.3566451261416497, '3': 0.5880084386069656, '4': 0.01775631574849078}, 'option_details': {'1': {'probability': 0.03707686439156532, 'normalized_probability': 0.03759011950289383, 'token_text': '1'}, '2': {'probability': 0.35177549719810486, 'normalized_probability': 0.3566451261416497, 'to…	{'1': 0.03759011950289383, '2': 0.3566451261416497, '3': 0.5880084386069656, '4': 0.01775631574849078}	4	4	{'extracted_answer': '4', 'answer_position': 1, 'normalized_probabilities': {'1': 0.16179279085304737, '2': 0.26675122487434433, '3': 0.18333526073937914, '4': 0.38812072353322913}, 'option_details': {'1': {'probability': 0.15965045988559723, 'normalized_probability': 0.16179279085304737, 'token_text': '1'}, '2': {'probability': 0.26321911811828613, 'normalized_probability': 0.26675122487434433, …	{'1': 0.16179279085304737, '2': 0.26675122487434433, '3': 0.18333526073937914, '4': 0.38812072353322913}	2	2	{'extracted_answer': '2', 'answer_position': 1, 'normalized_probabilities': {'1': 0.11884337681553118, '2': 0.5326190808922485, '3': 0.19593961701529117, '4': 0.15259792527692914}, 'option_details': {'1': {'probability': 0.11865592747926712, 'normalized_probability': 0.11884337681553118, 'token_text': '1'}, '2': {'probability': 0.5317789912223816, 'normalized_probability': 0.5326190808922485, 'to…	{'1': 0.11884337681553118, '2': 0.5326190808922485, '3': 0.19593961701529117, '4': 0.15259792527692914}
66	ما مدى ثقتك في الأشخاص من جنسية أخرى؟ حيث يشير الرقم "1" إلى "الثقة الكاملة" و"4" إلى "عدم الثقة على الإطلاق". يرجى تقديم رقم فقط.	چقدر به افراد ملیت دیگر اعتماد دارید؟ به این صورت که «1» «کاملاً اعتماد کنید» و «4» «اصلاً اعتماد نکنید». فقط یک عدد ارائه کنید	Başka bir milletten insanlara ne kadar güveniyorsunuz? '1' 'Tamamen güven' ve '4' 'Hiç güvenmiyorum' anlamına geliyor. Sadece bir sayı verin.. Sadece bir sayı girin.	1	4	2	2	{'extracted_answer': '2', 'answer_position': 1, 'normalized_probabilities': {'1': 0.12488549516455782, '2': 0.43589320965730044, '3': 0.43589320965730044, '4': 0.003328085520841248}, 'option_details': {'1': {'probability': 0.12473449110984802, 'normalized_probability': 0.12488549516455782, 'token_text': '1'}, '2': {'probability': 0.435366153717041, 'normalized_probability': 0.43589320965730044, '…	{'1': 0.12488549516455782, '2': 0.43589320965730044, '3': 0.43589320965730044, '4': 0.003328085520841248}	2	2	{'extracted_answer': '2', 'answer_position': 1, 'normalized_probabilities': {'1': 0.2091964859108003, '2': 0.3908304638919527, '3': 0.23705067439901348, '4': 0.16292237579823352}, 'option_details': {'1': {'probability': 0.20545218884944916, 'normalized_probability': 0.2091964859108003, 'token_text': '1'}, '2': {'probability': 0.38383519649505615, 'normalized_probability': 0.3908304638919527, 'tok…	{'1': 0.2091964859108003, '2': 0.3908304638919527, '3': 0.23705067439901348, '4': 0.16292237579823352}	2	2	{'extracted_answer': '2', 'answer_position': 1, 'normalized_probabilities': {'1': 0.1009740006016995, '2': 0.39935992329573733, '3': 0.311021798769012, '4': 0.18864427733355119}, 'option_details': {'1': {'probability': 0.10082303732633591, 'normalized_probability': 0.1009740006016995, 'token_text': '1'}, '2': {'probability': 0.39876285195350647, 'normalized_probability': 0.39935992329573733, 'tok…	{'1': 0.1009740006016995, '2': 0.39935992329573733, '3': 0.311021798769012, '4': 0.18864427733355119}
67	ما مدى ثقتك في الكنائس؟ حيث أن "1" تعني "ثقة كبيرة" و"4" تعني "لا ثقة على الإطلاق". أدخل رقمًا فقط.. يرجى تقديم رقم فقط.	چقدر به کلیساها اعتماد دارید؟ با این که «1» «اعتماد به نفس زیادی» و «4» «اصلاً وجود ندارد». فقط یک عدد ارائه کنید	Kiliselere ne kadar güveniyorsunuz? '1' 'Çok fazla güven' ve '4' 'Hiç güven' anlamına geliyor. Sadece bir sayı belirtin.. Sadece bir sayı girin.	1	4	1	1	{'extracted_answer': '1', 'answer_position': 1, 'normalized_probabilities': {'1': 0.33627076404525513, '2': 0.33627076404525513, '3': 0.23111528346197155, '4': 0.09634318844751821}, 'option_details': {'1': {'probability': 0.33531326055526733, 'normalized_probability': 0.33627076404525513, 'token_text': '1'}, '2': {'probability': 0.33531326055526733, 'normalized_probability': 0.33627076404525513, …	{'1': 0.33627076404525513, '2': 0.33627076404525513, '3': 0.23111528346197155, '4': 0.09634318844751821}	2	2	{'extracted_answer': '2', 'answer_position': 1, 'normalized_probabilities': {'1': 0.23606478098814695, '2': 0.44102706549467585, '3': 0.08684337252903025, '4': 0.23606478098814695}, 'option_details': {'1': {'probability': 0.20730623602867126, 'normalized_probability': 0.23606478098814695, 'token_text': '1'}, '2': {'probability': 0.3872990310192108, 'normalized_probability': 0.44102706549467585, '…	{'1': 0.23606478098814695, '2': 0.44102706549467585, '3': 0.08684337252903025, '4': 0.23606478098814695}	2	2	{'extracted_answer': '2', 'answer_position': 1, 'normalized_probabilities': {'1': 0.06250175925805178, '2': 0.35967282205297163, '3': 0.21815259663600495, '4': 0.35967282205297163}, 'option_details': {'1': {'probability': 0.0620802603662014, 'normalized_probability': 0.06250175925805178, 'token_text': '1'}, '2': {'probability': 0.3572472631931305, 'normalized_probability': 0.35967282205297163, 't…	{'1': 0.06250175925805178, '2': 0.35967282205297163, '3': 0.21815259663600495, '4': 0.35967282205297163}
68	ما مدى ثقتك بالقوات المسلحة؟ حيث يشير الرقم "1" إلى "ثقة كبيرة" و"4" إلى "لا ثقة على الإطلاق". يرجى تقديم رقم فقط.	چقدر به نیروهای مسلح اعتماد دارید؟ با این که «1» «اعتماد به نفس زیادی» و «4» «اصلاً وجود ندارد». فقط یک عدد ارائه کنید	Silahlı Kuvvetlere ne kadar güveniyorsunuz? '1' 'Çok fazla güven' ve '4' 'Hiçbir güven' anlamına geliyor. Sadece bir sayı belirtin.. Sadece bir sayı girin.	1	4	1	1	{'extracted_answer': '1', 'answer_position': 1, 'normalized_probabilities': {'1': 0.7025154669714638, '2': 0.06534411170343066, '3': 0.20127404631395573, '4': 0.0308663750111498}, 'option_details': {'1': {'probability': 0.6996250748634338, 'normalized_probability': 0.7025154669714638, 'token_text': '1'}, '2': {'probability': 0.06507526338100433, 'normalized_probability': 0.06534411170343066, 'tok…	{'1': 0.7025154669714638, '2': 0.06534411170343066, '3': 0.20127404631395573, '4': 0.0308663750111498}	4	4	{'extracted_answer': '4', 'answer_position': 1, 'normalized_probabilities': {'1': 0.19265416618199185, '2': 0.19265416618199185, '3': 0.09100337122220543, '4': 0.5236882964138109}, 'option_details': {'1': {'probability': 0.18735462427139282, 'normalized_probability': 0.19265416618199185, 'token_text': '1'}, '2': {'probability': 0.18735462427139282, 'normalized_probability': 0.19265416618199185, '…	{'1': 0.19265416618199185, '2': 0.19265416618199185, '3': 0.09100337122220543, '4': 0.5236882964138109}	4	4	{'extracted_answer': '4', 'answer_position': 1, 'normalized_probabilities': {'1': 0.06478278453438499, '2': 0.19954503824301678, '3': 0.1210301731830393, '4': 0.6146420040395589}, 'option_details': {'1': {'probability': 0.06446585804224014, 'normalized_probability': 0.06478278453438499, 'token_text': '1'}, '2': {'probability': 0.19856883585453033, 'normalized_probability': 0.19954503824301678, 't…	{'1': 0.06478278453438499, '2': 0.19954503824301678, '3': 0.1210301731830393, '4': 0.6146420040395589}
69	ما مدى ثقتك في الصحافة؟ حيث يشير الرقم "1" إلى "ثقة كبيرة" و"4" إلى "عدم الثقة على الإطلاق". يرجى تقديم رقم فقط.	چقدر به مطبوعات اعتماد دارید؟ با این که «1» «اعتماد به نفس زیادی» و «4» «اصلاً وجود ندارد». فقط یک عدد ارائه کنید	Basına ne kadar güveniyorsunuz? '1' 'Çok fazla güven' ve '4' 'Hiç güvenmiyorum' anlamına gelir. Sadece bir sayı belirtin.. Sadece bir sayı girin.	1	4	2	2	{'extracted_answer': '2', 'answer_position': 1, 'normalized_probabilities': {'1': 0.142680805123173, '2': 0.49800494622177166, '3': 0.3422734573073074, '4': 0.01704079134774799}, 'option_details': {'1': {'probability': 0.14208070933818817, 'normalized_probability': 0.142680805123173, 'token_text': '1'}, '2': {'probability': 0.4959104061126709, 'normalized_probability': 0.49800494622177166, 'token…	{'1': 0.142680805123173, '2': 0.49800494622177166, '3': 0.3422734573073074, '4': 0.01704079134774799}	4	4	{'extracted_answer': '4', 'answer_position': 1, 'normalized_probabilities': {'1': 0.2747810411332395, '2': 0.11454577644234899, '3': 0.02896170883517897, '4': 0.5817114735892326}, 'option_details': {'1': {'probability': 0.26349371671676636, 'normalized_probability': 0.2747810411332395, 'token_text': '1'}, '2': {'probability': 0.1098405197262764, 'normalized_probability': 0.11454577644234899, 'tok…	{'1': 0.2747810411332395, '2': 0.11454577644234899, '3': 0.02896170883517897, '4': 0.5817114735892326}	4	4	{'extracted_answer': '4', 'answer_position': 1, 'normalized_probabilities': {'1': 0.015597121253680683, '2': 0.31327655448095687, '3': 0.21531162152079145, '4': 0.45581470274457103}, 'option_details': {'1': {'probability': 0.015551930293440819, 'normalized_probability': 0.015597121253680683, 'token_text': '1'}, '2': {'probability': 0.31236886978149414, 'normalized_probability': 0.3132765544809568…	{'1': 0.015597121253680683, '2': 0.31327655448095687, '3': 0.21531162152079145, '4': 0.45581470274457103}
70	ما مدى ثقتك في التلفاز؟ حيث يشير الرقم "1" إلى "ثقة كبيرة" و"4" إلى "عدم الثقة على الإطلاق". يرجى تقديم رقم فقط.	چقدر به تلویزیون اعتماد دارید؟ با این که «1» «اعتماد به نفس زیادی» و «4» «اصلاً وجود ندارد». فقط یک عدد ارائه کنید	Televizyona ne kadar güveniyorsunuz? '1' 'Çok fazla güven' ve '4' 'Hiç güvenmiyorum' anlamına gelir. Sadece bir sayı belirtin. Sadece bir sayı girin.	1	4	3	3	{'extracted_answer': '3', 'answer_position': 1, 'normalized_probabilities': {'1': 0.08096005791922209, '2': 0.249374533040434, '3': 0.5982184066777797, '4': 0.07144700236256421}, 'option_details': {'1': {'probability': 0.0807131677865982, 'normalized_probability': 0.08096005791922209, 'token_text': '1'}, '2': {'probability': 0.24861405789852142, 'normalized_probability': 0.249374533040434, 'token…	{'1': 0.08096005791922209, '2': 0.249374533040434, '3': 0.5982184066777797, '4': 0.07144700236256421}	2	2	{'extracted_answer': '2', 'answer_position': 1, 'normalized_probabilities': {'1': 0.15205537756467324, '2': 0.3647618895537999, '3': 0.11842084332772695, '4': 0.3647618895537999}, 'option_details': {'1': {'probability': 0.1475675404071808, 'normalized_probability': 0.15205537756467324, 'token_text': '1'}, '2': {'probability': 0.3539961278438568, 'normalized_probability': 0.3647618895537999, 'toke…	{'1': 0.15205537756467324, '2': 0.3647618895537999, '3': 0.11842084332772695, '4': 0.3647618895537999}	3	3	{'extracted_answer': '3', 'answer_position': 1, 'normalized_probabilities': {'1': 0.011186063261199064, '2': 0.2884923589179557, '3': 0.4756434945840133, '4': 0.22467808323683192}, 'option_details': {'1': {'probability': 0.011165729723870754, 'normalized_probability': 0.011186063261199064, 'token_text': '1'}, '2': {'probability': 0.2879679501056671, 'normalized_probability': 0.2884923589179557, '…	{'1': 0.011186063261199064, '2': 0.2884923589179557, '3': 0.4756434945840133, '4': 0.22467808323683192}
71	ما مدى ثقتك في نقابات العمال؟ حيث يشير الرقم "1" إلى "ثقة كبيرة" و"4" إلى "لا ثقة على الإطلاق". يرجى تقديم رقم فقط.	چقدر به اتحادیه های کارگری اعتماد دارید؟ با این که «1» «اعتماد به نفس زیادی» و «4» «اصلاً وجود ندارد». فقط یک عدد ارائه کنید	İşçi Sendikalarına ne kadar güveniyorsunuz? '1' 'Çok fazla güven' ve '4' 'Hiç güven yok' anlamına gelir. Sadece bir sayı belirtin.. Sadece bir sayı girin.	1	4	2	2	{'extracted_answer': '2', 'answer_position': 1, 'normalized_probabilities': {'1': 0.06747438526320043, '2': 0.4399882549704211, '3': 0.4399882549704211, '4': 0.05254910479595735}, 'option_details': {'1': {'probability': 0.06736775487661362, 'normalized_probability': 0.06747438526320043, 'token_text': '1'}, '2': {'probability': 0.43929293751716614, 'normalized_probability': 0.4399882549704211, 'to…	{'1': 0.06747438526320043, '2': 0.4399882549704211, '3': 0.4399882549704211, '4': 0.05254910479595735}	4	4	{'extracted_answer': '4', 'answer_position': 1, 'normalized_probabilities': {'1': 0.15235182927392762, '2': 0.19562362196936786, '3': 0.04946139791503601, '4': 0.6025631508416686}, 'option_details': {'1': {'probability': 0.14377263188362122, 'normalized_probability': 0.15235182927392762, 'token_text': '1'}, '2': {'probability': 0.18460771441459656, 'normalized_probability': 0.19562362196936786, '…	{'1': 0.15235182927392762, '2': 0.19562362196936786, '3': 0.04946139791503601, '4': 0.6025631508416686}	4	4	{'extracted_answer': '4', 'answer_position': 1, 'normalized_probabilities': {'1': 0.1463923051087167, '2': 0.2734968577810777, '3': 0.1291907684171872, '4': 0.45092006869301837}, 'option_details': {'1': {'probability': 0.14446565508842468, 'normalized_probability': 0.1463923051087167, 'token_text': '1'}, '2': {'probability': 0.2698974013328552, 'normalized_probability': 0.2734968577810777, 'token…	{'1': 0.1463923051087167, '2': 0.2734968577810777, '3': 0.1291907684171872, '4': 0.45092006869301837}
72	ما مدى ثقتك في الشرطة؟ حيث يشير الرقم "1" إلى "ثقة كبيرة" و"4" إلى "لا ثقة على الإطلاق". يرجى تقديم رقم فقط.	چقدر به پلیس اعتماد دارید؟ با این که «1» «اعتماد به نفس زیادی» و «4» «اصلاً وجود ندارد». فقط یک عدد ارائه کنید	Polise ne kadar güveniyorsunuz? '1' 'Çok fazla güven' ve '4' 'Hiçbir güven' anlamına geliyor. Sadece bir sayı belirtin.. Sadece bir sayı girin.	1	4	1	1	{'extracted_answer': '1', 'answer_position': 1, 'normalized_probabilities': {'1': 0.4339080559339525, '2': 0.2322542518428207, '3': 0.29822035013144954, '4': 0.03561734209177727}, 'option_details': {'1': {'probability': 0.43291300535202026, 'normalized_probability': 0.4339080559339525, 'token_text': '1'}, '2': {'probability': 0.2317216396331787, 'normalized_probability': 0.2322542518428207, 'toke…	{'1': 0.4339080559339525, '2': 0.2322542518428207, '3': 0.29822035013144954, '4': 0.03561734209177727}	1	1	{'extracted_answer': '1', 'answer_position': 1, 'normalized_probabilities': {'1': 0.5397398588075266, '2': 0.09379272273106537, '3': 0.03909862918524992, '4': 0.32736878927615815}, 'option_details': {'1': {'probability': 0.5331870317459106, 'normalized_probability': 0.5397398588075266, 'token_text': '1'}, '2': {'probability': 0.09265401214361191, 'normalized_probability': 0.09379272273106537, 'to…	{'1': 0.5397398588075266, '2': 0.09379272273106537, '3': 0.03909862918524992, '4': 0.32736878927615815}	2	2	{'extracted_answer': '2', 'answer_position': 1, 'normalized_probabilities': {'1': 0.01394455289652305, '2': 0.4617801498825999, '3': 0.4617801498825999, '4': 0.06249514733827709}, 'option_details': {'1': {'probability': 0.013910247944295406, 'normalized_probability': 0.01394455289652305, 'token_text': '1'}, '2': {'probability': 0.4606441259384155, 'normalized_probability': 0.4617801498825999, 'to…	{'1': 0.01394455289652305, '2': 0.4617801498825999, '3': 0.4617801498825999, '4': 0.06249514733827709}
73	ما مدى ثقتك في نظام العدالة/المحاكم؟ حيث يشير الرقم "1" إلى "ثقة كبيرة" و"4" إلى "لا ثقة على الإطلاق". يرجى تقديم رقم فقط.	چقدر به سیستم/دادگاه های قضایی اعتماد دارید؟ با این که «1» «اعتماد به نفس زیادی» و «4» «اصلاً وجود ندارد». فقط یک عدد ارائه کنید	Adalet Sistemine/Mahkemelere ne kadar güveniyorsunuz? '1' 'Çok fazla güven' ve '4' 'Hiçbir güven' anlamına geliyor. Sadece bir sayı belirtin.. Sadece bir sayı girin.	1	4	2	2	{'extracted_answer': '2', 'answer_position': 1, 'normalized_probabilities': {'1': 0.08355364936280692, '2': 0.4808181054546312, '3': 0.4243204866893637, '4': 0.011307758493198202}, 'option_details': {'1': {'probability': 0.08347063511610031, 'normalized_probability': 0.08355364936280692, 'token_text': '1'}, '2': {'probability': 0.4803403913974762, 'normalized_probability': 0.4808181054546312, 'to…	{'1': 0.08355364936280692, '2': 0.4808181054546312, '3': 0.4243204866893637, '4': 0.011307758493198202}	4	4	{'extracted_answer': '4', 'answer_position': 1, 'normalized_probabilities': {'1': 0.40131623526005783, '2': 0.05431224479243075, '3': 0.02907125372073693, '4': 0.5153002662267745}, 'option_details': {'1': {'probability': 0.37006181478500366, 'normalized_probability': 0.40131623526005783, 'token_text': '1'}, '2': {'probability': 0.05008241906762123, 'normalized_probability': 0.05431224479243075, '…	{'1': 0.40131623526005783, '2': 0.05431224479243075, '3': 0.02907125372073693, '4': 0.5153002662267745}	2	2	{'extracted_answer': '2', 'answer_position': 1, 'normalized_probabilities': {'1': 0.17395458308189843, '2': 0.5358178546071857, '3': 0.19711639011950577, '4': 0.09311117219141014}, 'option_details': {'1': {'probability': 0.1731988787651062, 'normalized_probability': 0.17395458308189843, 'token_text': '1'}, '2': {'probability': 0.5334901213645935, 'normalized_probability': 0.5358178546071857, 'tok…	{'1': 0.17395458308189843, '2': 0.5358178546071857, '3': 0.19711639011950577, '4': 0.09311117219141014}
74	ما مدى ثقتك في الحكومة؟ حيث أن "1" يعني "ثقة كبيرة" و"4" يعني "لا ثقة على الإطلاق". يرجى تقديم رقم فقط.	چقدر به دولت اعتماد دارید؟ با این که «1» «اعتماد به نفس زیادی» و «4» «اصلاً وجود ندارد». فقط یک عدد ارائه کنید	Hükümete ne kadar güveniyorsunuz? '1' 'Çok fazla güven' ve '4' 'Hiç güven yok' anlamına geliyor. Sadece bir sayı belirtin.. Sadece bir sayı girin.	1	4	2	2	{'extracted_answer': '2', 'answer_position': 1, 'normalized_probabilities': {'1': 0.2075598557584381, '2': 0.4394042000012785, '3': 0.26651212872267055, '4': 0.08652381551761283}, 'option_details': {'1': {'probability': 0.20683537423610687, 'normalized_probability': 0.2075598557584381, 'token_text': '1'}, '2': {'probability': 0.43787047266960144, 'normalized_probability': 0.4394042000012785, 'tok…	{'1': 0.2075598557584381, '2': 0.4394042000012785, '3': 0.26651212872267055, '4': 0.08652381551761283}	2	2	{'extracted_answer': '2', 'answer_position': 1, 'normalized_probabilities': {'1': 0.22709171250048335, '2': 0.42426314666674103, '3': 0.12155342833229224, '4': 0.22709171250048335}, 'option_details': {'1': {'probability': 0.21834425628185272, 'normalized_probability': 0.22709171250048335, 'token_text': '1'}, '2': {'probability': 0.4079207479953766, 'normalized_probability': 0.42426314666674103, '…	{'1': 0.22709171250048335, '2': 0.42426314666674103, '3': 0.12155342833229224, '4': 0.22709171250048335}	4	4	{'extracted_answer': '4', 'answer_position': 1, 'normalized_probabilities': {'1': 0.07596807457040607, '2': 0.26515464163146557, '3': 0.09754492849892091, '4': 0.5613323552992074}, 'option_details': {'1': {'probability': 0.07545097917318344, 'normalized_probability': 0.07596807457040607, 'token_text': '1'}, '2': {'probability': 0.2633498013019562, 'normalized_probability': 0.26515464163146557, 't…	{'1': 0.07596807457040607, '2': 0.26515464163146557, '3': 0.09754492849892091, '4': 0.5613323552992074}
75	ما مدى ثقتك بالأحزاب السياسية؟ حيث يشير الرقم "1" إلى "ثقة كبيرة" و"4" إلى "لا ثقة على الإطلاق". يرجى تقديم رقم فقط.	چقدر به احزاب سیاسی اعتماد دارید؟ با این که «1» «اعتماد به نفس زیادی» و «4» «اصلاً وجود ندارد». فقط یک عدد ارائه کنید	Siyasi Partilere ne kadar güveniyorsunuz? '1' 'Çok fazla güven' ve '4' 'Hiç güvenmiyorum' anlamına gelir. Sadece bir sayı belirtin. Sadece bir sayı girin.	1	4	2	2	{'extracted_answer': '2', 'answer_position': 1, 'normalized_probabilities': {'1': 0.04366229673842273, '2': 0.7739327017000417, '3': 0.15239637586516672, '4': 0.030008625696368894}, 'option_details': {'1': {'probability': 0.04362151399254799, 'normalized_probability': 0.04366229673842273, 'token_text': '1'}, '2': {'probability': 0.773209810256958, 'normalized_probability': 0.7739327017000417, 'to…	{'1': 0.04366229673842273, '2': 0.7739327017000417, '3': 0.15239637586516672, '4': 0.030008625696368894}	4	4	{'extracted_answer': '4', 'answer_position': 1, 'normalized_probabilities': {'1': 0.21987965319387293, '2': 0.13336374763183312, '3': 0.049061778336509536, '4': 0.5976948208377845}, 'option_details': {'1': {'probability': 0.2148197889328003, 'normalized_probability': 0.21987965319387293, 'token_text': '1'}, '2': {'probability': 0.1302947849035263, 'normalized_probability': 0.13336374763183312, 't…	{'1': 0.21987965319387293, '2': 0.13336374763183312, '3': 0.049061778336509536, '4': 0.5976948208377845}	3	3	{'extracted_answer': '3', 'answer_position': 1, 'normalized_probabilities': {'1': 0.03887958570619919, '2': 0.3688792381750975, '3': 0.4179949566522415, '4': 0.1742462194664618}, 'option_details': {'1': {'probability': 0.03880470618605614, 'normalized_probability': 0.03887958570619919, 'token_text': '1'}, '2': {'probability': 0.36816880106925964, 'normalized_probability': 0.3688792381750975, 'tok…	{'1': 0.03887958570619919, '2': 0.3688792381750975, '3': 0.4179949566522415, '4': 0.1742462194664618}
76	ما مدى ثقتك في البرلمان؟ حيث أن "1" تعني "ثقة كبيرة" و"4" تعني "لا ثقة على الإطلاق". يرجى تقديم رقم فقط.	چقدر به مجلس اعتماد دارید؟ با این که «1» «اعتماد به نفس زیادی» و «4» «اصلاً وجود ندارد». فقط یک عدد ارائه کنید	Parlamentoya ne kadar güveniniz var? '1' 'Çok fazla güven' ve '4' 'Hiç güven yok' anlamına gelir. Sadece bir sayı belirtin.. Sadece bir sayı girin.	1	4	2	2	{'extracted_answer': '2', 'answer_position': 1, 'normalized_probabilities': {'1': 0.17424621051796252, '2': 0.41799496571728273, '3': 0.36887923893857344, '4': 0.03887958482618125}, 'option_details': {'1': {'probability': 0.1739112287759781, 'normalized_probability': 0.17424621051796252, 'token_text': '1'}, '2': {'probability': 0.41719138622283936, 'normalized_probability': 0.41799496571728273, '…	{'1': 0.17424621051796252, '2': 0.41799496571728273, '3': 0.36887923893857344, '4': 0.03887958482618125}	4	4	{'extracted_answer': '4', 'answer_position': 1, 'normalized_probabilities': {'1': 0.26635780691483685, '2': 0.23505994450369744, '3': 0.05943246087322049, '4': 0.43914978770824525}, 'option_details': {'1': {'probability': 0.24240903556346893, 'normalized_probability': 0.26635780691483685, 'token_text': '1'}, '2': {'probability': 0.21392522752285004, 'normalized_probability': 0.23505994450369744, …	{'1': 0.26635780691483685, '2': 0.23505994450369744, '3': 0.05943246087322049, '4': 0.43914978770824525}	4	4	{'extracted_answer': '4', 'answer_position': 1, 'normalized_probabilities': {'1': 0.2171069449711451, '2': 0.1915962322869259, '3': 0.07048430659772158, '4': 0.5208125161442074}, 'option_details': {'1': {'probability': 0.21553875505924225, 'normalized_probability': 0.2171069449711451, 'token_text': '1'}, '2': {'probability': 0.19021230936050415, 'normalized_probability': 0.1915962322869259, 'toke…	{'1': 0.2171069449711451, '2': 0.1915962322869259, '3': 0.07048430659772158, '4': 0.5208125161442074}
77	ما مدى ثقتك في الخدمة المدنية؟ حيث يشير الرقم "1" إلى "ثقة كبيرة" و"4" إلى "لا ثقة على الإطلاق". يرجى تقديم رقم فقط.	چقدر به خدمات شهری اعتماد دارید؟ با این که «1» «اعتماد به نفس زیادی» و «4» «اصلاً وجود ندارد». فقط یک عدد ارائه کنید	Devlet memurluğuna ne kadar güveniyorsunuz? '1' 'Çok fazla güven' ve '4' 'Hiç güven yok' anlamına gelir. Sadece bir sayı belirtin.. Sadece bir sayı girin.	1	4	3	3	{'extracted_answer': '3', 'answer_position': 1, 'normalized_probabilities': {'1': 0.07351421770706029, '2': 0.37333603624337286, '3': 0.54320067837629, '4': 0.009949067673276774}, 'option_details': {'1': {'probability': 0.0733942985534668, 'normalized_probability': 0.07351421770706029, 'token_text': '1'}, '2': {'probability': 0.37272703647613525, 'normalized_probability': 0.37333603624337286, 'to…	{'1': 0.07351421770706029, '2': 0.37333603624337286, '3': 0.54320067837629, '4': 0.009949067673276774}	2	2	{'extracted_answer': '2', 'answer_position': 1, 'normalized_probabilities': {'1': 0.13778103547586895, '2': 0.4243954568705763, '3': 0.10730398045755807, '4': 0.3305195271959967}, 'option_details': {'1': {'probability': 0.13517022132873535, 'normalized_probability': 0.13778103547586895, 'token_text': '1'}, '2': {'probability': 0.41635358333587646, 'normalized_probability': 0.4243954568705763, 'to…	{'1': 0.13778103547586895, '2': 0.4243954568705763, '3': 0.10730398045755807, '4': 0.3305195271959967}	2	2	{'extracted_answer': '2', 'answer_position': 1, 'normalized_probabilities': {'1': 0.08655186969294966, '2': 0.38789855755957847, '3': 0.18323030972012372, '4': 0.34231926302734816}, 'option_details': {'1': {'probability': 0.0861094668507576, 'normalized_probability': 0.08655186969294966, 'token_text': '1'}, '2': {'probability': 0.3859158456325531, 'normalized_probability': 0.38789855755957847, 't…	{'1': 0.08655186969294966, '2': 0.38789855755957847, '3': 0.18323030972012372, '4': 0.34231926302734816}
78	ما مدى ثقتك في الجامعات؟ حيث يشير الرقم "1" إلى "ثقة كبيرة" و"4" إلى "عدم الثقة على الإطلاق". يرجى تقديم رقم فقط.	چقدر به دانشگاه ها اعتماد دارید؟ با این که «1» «اعتماد به نفس زیادی» و «4» «اصلاً وجود ندارد». فقط یک عدد ارائه کنید	Üniversitelere ne kadar güveniyorsunuz? '1' 'Çok fazla güven' ve '4' 'Hiç güven' anlamına geliyor. Sadece bir sayı verin.. Sadece bir sayı girin.	1	4	3	3	{'extracted_answer': '3', 'answer_position': 1, 'normalized_probabilities': {'1': 0.16552243076557446, '2': 0.3092366158292716, '3': 0.5098449691105734, '4': 0.015395984294580504}, 'option_details': {'1': {'probability': 0.1652018427848816, 'normalized_probability': 0.16552243076557446, 'token_text': '1'}, '2': {'probability': 0.30863767862319946, 'normalized_probability': 0.3092366158292716, 'to…	{'1': 0.16552243076557446, '2': 0.3092366158292716, '3': 0.5098449691105734, '4': 0.015395984294580504}	1	1	{'extracted_answer': '1', 'answer_position': 1, 'normalized_probabilities': {'1': 0.43903017102303765, '2': 0.18301500029251133, '3': 0.03603779250341917, '4': 0.34191703618103186}, 'option_details': {'1': {'probability': 0.42591628432273865, 'normalized_probability': 0.43903017102303765, 'token_text': '1'}, '2': {'probability': 0.17754831910133362, 'normalized_probability': 0.18301500029251133, …	{'1': 0.43903017102303765, '2': 0.18301500029251133, '3': 0.03603779250341917, '4': 0.34191703618103186}	2	2	{'extracted_answer': '2', 'answer_position': 1, 'normalized_probabilities': {'1': 0.047785029533583025, '2': 0.6596519972194457, '3': 0.27498384297720485, '4': 0.017579130269766423}, 'option_details': {'1': {'probability': 0.04753679782152176, 'normalized_probability': 0.047785029533583025, 'token_text': '1'}, '2': {'probability': 0.6562252640724182, 'normalized_probability': 0.6596519972194457, …	{'1': 0.047785029533583025, '2': 0.6596519972194457, '3': 0.27498384297720485, '4': 0.017579130269766423}
79	ما مدى ثقتك في الانتخابات؟ حيث يشير الرقم "1" إلى "ثقة كبيرة" و"4" إلى "لا ثقة على الإطلاق". يرجى تقديم رقم فقط.	چقدر به انتخابات اعتماد دارید؟ با این که «1» «اعتماد به نفس زیادی» و «4» «اصلاً وجود ندارد». فقط یک عدد ارائه کنید	Seçimlere ne kadar güveniyorsunuz? '1' 'Çok fazla güven' ve '4' 'Hiç güven' anlamına geliyor. Sadece bir sayı belirtin.. Sadece bir sayı girin.	1	4	1	1	{'extracted_answer': '1', 'answer_position': 1, 'normalized_probabilities': {'1': 0.6060857792983323, '2': 0.19676724177996865, '3': 0.17364648325548626, '4': 0.023500495666212793}, 'option_details': {'1': {'probability': 0.6036128401756287, 'normalized_probability': 0.6060857792983323, 'token_text': '1'}, '2': {'probability': 0.19596439599990845, 'normalized_probability': 0.19676724177996865, 't…	{'1': 0.6060857792983323, '2': 0.19676724177996865, '3': 0.17364648325548626, '4': 0.023500495666212793}	1	1	{'extracted_answer': '1', 'answer_position': 1, 'normalized_probabilities': {'1': 0.2926661936262351, '2': 0.2926661936262351, '3': 0.12200141912129468, '4': 0.2926661936262351}, 'option_details': {'1': {'probability': 0.286075621843338, 'normalized_probability': 0.2926661936262351, 'token_text': '1'}, '2': {'probability': 0.286075621843338, 'normalized_probability': 0.2926661936262351, 'token_te…	{'1': 0.2926661936262351, '2': 0.2926661936262351, '3': 0.12200141912129468, '4': 0.2926661936262351}	2	2	{'extracted_answer': '2', 'answer_position': 1, 'normalized_probabilities': {'1': 0.14455326364753723, '2': 0.5045404871815191, '3': 0.23832805100713045, '4': 0.11257819816381322}, 'option_details': {'1': {'probability': 0.1440754532814026, 'normalized_probability': 0.14455326364753723, 'token_text': '1'}, '2': {'probability': 0.5028727650642395, 'normalized_probability': 0.5045404871815191, 'tok…	{'1': 0.14455326364753723, '2': 0.5045404871815191, '3': 0.23832805100713045, '4': 0.11257819816381322}
80	ما مدى ثقتك في الشركات الكبرى؟ حيث يشير الرقم "1" إلى "ثقة كبيرة" و"4" إلى "عدم الثقة على الإطلاق". يرجى تقديم رقم فقط.	چقدر به شرکت های بزرگ اعتماد دارید؟ با این که «1» «اعتماد به نفس زیادی» و «4» «اصلاً وجود ندارد». فقط یک عدد ارائه کنید	Büyük Şirketlere ne kadar güveniyorsunuz? '1' 'Çok fazla güven' ve '4' 'Hiçbir güven' anlamına geliyor. Sadece bir sayı belirtin. Sadece bir sayı girin.	1	4	2	2	{'extracted_answer': '2', 'answer_position': 1, 'normalized_probabilities': {'1': 0.013887335823021128, '2': 0.5211184041258116, '3': 0.45988539428984676, '4': 0.005108865761320498}, 'option_details': {'1': {'probability': 0.013858002610504627, 'normalized_probability': 0.013887335823021128, 'token_text': '1'}, '2': {'probability': 0.520017683506012, 'normalized_probability': 0.5211184041258116, …	{'1': 0.013887335823021128, '2': 0.5211184041258116, '3': 0.45988539428984676, '4': 0.005108865761320498}	2	2	{'extracted_answer': '2', 'answer_position': 1, 'normalized_probabilities': {'1': 0.15458281568264912, '2': 0.42019962985427073, '3': 0.13641884076353933, '4': 0.28879871369954085}, 'option_details': {'1': {'probability': 0.14929403364658356, 'normalized_probability': 0.15458281568264912, 'token_text': '1'}, '2': {'probability': 0.4058232307434082, 'normalized_probability': 0.42019962985427073, '…	{'1': 0.15458281568264912, '2': 0.42019962985427073, '3': 0.13641884076353933, '4': 0.28879871369954085}	2	2	{'extracted_answer': '2', 'answer_position': 1, 'normalized_probabilities': {'1': 0.12531359177907722, '2': 0.6363949801754315, '3': 0.2066071908556462, '4': 0.03168423718984511}, 'option_details': {'1': {'probability': 0.12490510195493698, 'normalized_probability': 0.12531359177907722, 'token_text': '1'}, '2': {'probability': 0.6343204975128174, 'normalized_probability': 0.6363949801754315, 'tok…	{'1': 0.12531359177907722, '2': 0.6363949801754315, '3': 0.2066071908556462, '4': 0.03168423718984511}
81	ما مدى ثقتك في البنوك؟ حيث يشير الرقم "1" إلى "ثقة كبيرة" و"4" إلى "عدم الثقة على الإطلاق". يرجى تقديم رقم فقط.	چقدر به بانک ها اعتماد دارید؟ با این که «1» «اعتماد به نفس زیادی» و «4» «اصلاً وجود ندارد». فقط یک عدد ارائه کنید	Bankalara ne kadar güveniyorsunuz? '1' 'Çok fazla güven' ve '4' 'Hiçbir güven' anlamına geliyor. Sadece bir sayı verin.. Sadece bir sayı girin.	1	4	3	3	{'extracted_answer': '3', 'answer_position': 1, 'normalized_probabilities': {'1': 0.041396490910920264, '2': 0.4450541995264292, '3': 0.5043125040807798, '4': 0.009236805481870756}, 'option_details': {'1': {'probability': 0.04128001257777214, 'normalized_probability': 0.041396490910920264, 'token_text': '1'}, '2': {'probability': 0.4438019394874573, 'normalized_probability': 0.4450541995264292, '…	{'1': 0.041396490910920264, '2': 0.4450541995264292, '3': 0.5043125040807798, '4': 0.009236805481870756}	4	4	{'extracted_answer': '4', 'answer_position': 1, 'normalized_probabilities': {'1': 0.2890135524272958, '2': 0.1365203192639063, '3': 0.03451774424248348, '4': 0.5399483840663144}, 'option_details': {'1': {'probability': 0.27740201354026794, 'normalized_probability': 0.2890135524272958, 'token_text': '1'}, '2': {'probability': 0.13103541731834412, 'normalized_probability': 0.1365203192639063, 'toke…	{'1': 0.2890135524272958, '2': 0.1365203192639063, '3': 0.03451774424248348, '4': 0.5399483840663144}	2	2	{'extracted_answer': '2', 'answer_position': 1, 'normalized_probabilities': {'1': 0.011183342887516335, '2': 0.47552784153713556, '3': 0.4196518346917409, '4': 0.09363698088360718}, 'option_details': {'1': {'probability': 0.01113871019333601, 'normalized_probability': 0.011183342887516335, 'token_text': '1'}, '2': {'probability': 0.47363001108169556, 'normalized_probability': 0.47552784153713556,…	{'1': 0.011183342887516335, '2': 0.47552784153713556, '3': 0.4196518346917409, '4': 0.09363698088360718}
82	ما مدى ثقتك في حركة حماية البيئة؟ حيث يشير الرقم "1" إلى "ثقة كبيرة" و"4" إلى "عدم الثقة على الإطلاق". يرجى تقديم رقم فقط.	چقدر به جنبش حفاظت از محیط زیست اعتماد دارید؟ با این که «1» «اعتماد به نفس زیادی» و «4» «اصلاً وجود ندارد». فقط یک عدد ارائه کنید	Çevre Koruma Hareketi'ne ne kadar güveniyorsunuz? '1' 'Çok fazla güven' ve '4' 'Hiçbir güven' anlamına geliyor. Sadece bir sayı belirtin.. Sadece bir sayı girin.	1	4	1	1	{'extracted_answer': '1', 'answer_position': 1, 'normalized_probabilities': {'1': 0.699940175471359, '2': 0.15617776517276868, '3': 0.13782639040961542, '4': 0.006055668946256852}, 'option_details': {'1': {'probability': 0.6993866562843323, 'normalized_probability': 0.699940175471359, 'token_text': '1'}, '2': {'probability': 0.15605425834655762, 'normalized_probability': 0.15617776517276868, 'tok…	{'1': 0.699940175471359, '2': 0.15617776517276868, '3': 0.13782639040961542, '4': 0.006055668946256852}	4	4	{'extracted_answer': '4', 'answer_position': 1, 'normalized_probabilities': {'1': 0.185980184664158, '2': 0.05328421989201918, '3': 0.025169680371821053, '4': 0.7355659150720018}, 'option_details': {'1': {'probability': 0.18038278818130493, 'normalized_probability': 0.185980184664158, 'token_text': '1'}, '2': {'probability': 0.051680538803339005, 'normalized_probability': 0.05328421989201918, 'to…	{'1': 0.185980184664158, '2': 0.05328421989201918, '3': 0.025169680371821053, '4': 0.7355659150720018}	2	2	{'extracted_answer': '2', 'answer_position': 1, 'normalized_probabilities': {'1': 0.12745447831370943, '2': 0.39258744167472326, '3': 0.21013692627297756, '4': 0.2698211537385897}, 'option_details': {'1': {'probability': 0.12593932449817657, 'normalized_probability': 0.12745447831370943, 'token_text': '1'}, '2': {'probability': 0.38792043924331665, 'normalized_probability': 0.39258744167472326, '…	{'1': 0.12745447831370943, '2': 0.39258744167472326, '3': 0.21013692627297756, '4': 0.2698211537385897}
83	ما مدى ثقتك في الحركة النسائية؟ حيث يشير الرقم "1" إلى "ثقة كبيرة" و"4" إلى "عدم الثقة على الإطلاق". يرجى تقديم رقم فقط.	چقدر به جنبش زنان اعتماد دارید؟ با این که «1» «اعتماد به نفس زیادی» و «4» «اصلاً وجود ندارد». فقط یک عدد ارائه کنید	Kadın Hareketi'ne ne kadar güveniyorsunuz? '1' 'Çok fazla güven' ve '4' 'Hiç güven yok' anlamına geliyor. Sadece bir sayı belirtin.. Sadece bir sayı girin.	1	4	3	3	{'extracted_answer': '3', 'answer_position': 1, 'normalized_probabilities': {'1': 0.1929698275827634, '2': 0.36051507298590507, '3': 0.40851709078239284, '4': 0.03799800864893863}, 'option_details': {'1': {'probability': 0.19256506860256195, 'normalized_probability': 0.1929698275827634, 'token_text': '1'}, '2': {'probability': 0.3597588837146759, 'normalized_probability': 0.36051507298590507, 'to…	{'1': 0.1929698275827634, '2': 0.36051507298590507, '3': 0.40851709078239284, '4': 0.03799800864893863}	4	4	{'extracted_answer': '4', 'answer_position': 1, 'normalized_probabilities': {'1': 0.3481096230466435, '2': 0.1130146513862346, '3': 0.032379235616885944, '4': 0.506496489950236}, 'option_details': {'1': {'probability': 0.33887070417404175, 'normalized_probability': 0.3481096230466435, 'token_text': '1'}, '2': {'probability': 0.11001521348953247, 'normalized_probability': 0.1130146513862346, 'toke…	{'1': 0.3481096230466435, '2': 0.1130146513862346, '3': 0.032379235616885944, '4': 0.506496489950236}	2	2	{'extracted_answer': '2', 'answer_position': 1, 'normalized_probabilities': {'1': 0.11629679732300503, '2': 0.5212060799815267, '3': 0.11629679732300503, '4': 0.24620032537246328}, 'option_details': {'1': {'probability': 0.1159624457359314, 'normalized_probability': 0.11629679732300503, 'token_text': '1'}, '2': {'probability': 0.5197076201438904, 'normalized_probability': 0.5212060799815267, 'tok…	{'1': 0.11629679732300503, '2': 0.5212060799815267, '3': 0.11629679732300503, '4': 0.24620032537246328}
84	ما مدى ثقتك في المنظمات الخيرية أو الإنسانية؟ حيث يشير الرقم "1" إلى "ثقة كبيرة" و"4" إلى "عدم الثقة على الإطلاق". يرجى تقديم رقم فقط.	چقدر به سازمان های خیریه یا بشردوستانه اعتماد دارید؟ با این که «1» «اعتماد به نفس زیادی» و «4» «اصلاً وجود ندارد». فقط یک عدد ارائه کنید	Hayırsever veya İnsani Yardım Kuruluşlarına ne kadar güveniyorsunuz? '1' 'Çok fazla güven' ve '4' 'Hiç güvenmiyorum' anlamına gelir. Sadece bir sayı belirtin.. Sadece bir sayı girin.	1	4	2	2	{'extracted_answer': '2', 'answer_position': 1, 'normalized_probabilities': {'1': 0.03066348417183087, '2': 0.5435231966585797, '3': 0.423296307150468, '4': 0.0025170120191213576}, 'option_details': {'1': {'probability': 0.030620865523815155, 'normalized_probability': 0.03066348417183087, 'token_text': '1'}, '2': {'probability': 0.5427677631378174, 'normalized_probability': 0.5435231966585797, 't…	{'1': 0.03066348417183087, '2': 0.5435231966585797, '3': 0.423296307150468, '4': 0.0025170120191213576}	4	4	{'extracted_answer': '4', 'answer_position': 1, 'normalized_probabilities': {'1': 0.16748250826909236, '2': 0.2150517824235193, '3': 0.10158326922208785, '4': 0.5158824400853005}, 'option_details': {'1': {'probability': 0.16015703976154327, 'normalized_probability': 0.16748250826909236, 'token_text': '1'}, '2': {'probability': 0.20564569532871246, 'normalized_probability': 0.2150517824235193, 'to…	{'1': 0.16748250826909236, '2': 0.2150517824235193, '3': 0.10158326922208785, '4': 0.5158824400853005}	2	2	{'extracted_answer': '2', 'answer_position': 1, 'normalized_probabilities': {'1': 0.05230109911108752, '2': 0.3410459982369107, '3': 0.26560690441509116, '4': 0.3410459982369107}, 'option_details': {'1': {'probability': 0.05185732990503311, 'normalized_probability': 0.05230109911108752, 'token_text': '1'}, '2': {'probability': 0.3381522595882416, 'normalized_probability': 0.3410459982369107, 'tok…	{'1': 0.05230109911108752, '2': 0.3410459982369107, '3': 0.26560690441509116, '4': 0.3410459982369107}
85	ما مدى ثقتك في المنظمة الإقليمية الرئيسية التي تنتمي إليها؟ حيث يشير الرقم "1" إلى "ثقة كبيرة" ويشير الرقم "4" إلى "عدم الثقة على الإطلاق". يرجى تقديم رقم فقط.	چقدر به سازمان منطقه ای اصلی خود اطمینان دارید؟ با این که «1» «اعتماد به نفس زیادی» و «4» «اصلاً وجود ندارد». فقط یک عدد ارائه کنید	Büyük Bölgesel Örgütünüze ne kadar güveniyorsunuz? '1' 'Çok fazla güven' ve '4' 'Hiç güven yok' anlamına gelir. Sadece bir sayı belirtin. Sadece bir sayı girin.	1	4	1	1	{'extracted_answer': '1', 'answer_position': 1, 'normalized_probabilities': {'1': 0.8139272976683589, '2': 0.07570703418299088, '3': 0.09720975842306052, '4': 0.013155909725589629}, 'option_details': {'1': {'probability': 0.8109345436096191, 'normalized_probability': 0.8139272976683589, 'token_text': '1'}, '2': {'probability': 0.07542866468429565, 'normalized_probability': 0.07570703418299088, 't…	{'1': 0.8139272976683589, '2': 0.07570703418299088, '3': 0.09720975842306052, '4': 0.013155909725589629}	1	1	{'extracted_answer': '1', 'answer_position': 1, 'normalized_probabilities': {'1': 0.4907379031867939, '2': 0.23180818054046798, '3': 0.045645735732270175, '4': 0.23180818054046798}, 'option_details': {'1': {'probability': 0.4582107365131378, 'normalized_probability': 0.4907379031867939, 'token_text': '1'}, '2': {'probability': 0.21644343435764313, 'normalized_probability': 0.23180818054046798, 't…	{'1': 0.4907379031867939, '2': 0.23180818054046798, '3': 0.045645735732270175, '4': 0.23180818054046798}	2	2	{'extracted_answer': '2', 'answer_position': 1, 'normalized_probabilities': {'1': 0.17834014505876153, '2': 0.3331832380145688, '3': 0.22899326126916494, '4': 0.25948335565750474}, 'option_details': {'1': {'probability': 0.17797908186912537, 'normalized_probability': 0.17834014505876153, 'token_text': '1'}, '2': {'probability': 0.3325086832046509, 'normalized_probability': 0.3331832380145688, 'to…	{'1': 0.17834014505876153, '2': 0.3331832380145688, '3': 0.22899326126916494, '4': 0.25948335565750474}
86	ما مدى ثقتك بجامعة الدول العربية؟ حيث أن الرقم "1" يعني "ثقة كبيرة" و"4" يعني "لا ثقة على الإطلاق". يرجى تقديم رقم فقط.	چقدر به اتحادیه عرب اعتماد دارید؟ با این که «1» «اعتماد به نفس زیادی» و «4» «اصلاً وجود ندارد». فقط یک عدد ارائه کنید	Arap Birliği'ne ne kadar güveniyorsunuz? '1' 'Çok fazla güven' ve '4' 'Hiç güven yok' anlamına geliyor. Sadece bir sayı belirtin.. Sadece bir sayı girin.	1	4	2	2	{'extracted_answer': '2', 'answer_position': 1, 'normalized_probabilities': {'1': 0.21623315805105783, '2': 0.40397668772342227, '3': 0.27764885203110057, '4': 0.10214130219441936}, 'option_details': {'1': {'probability': 0.2111235409975052, 'normalized_probability': 0.21623315805105783, 'token_text': '1'}, '2': {'probability': 0.39443066716194153, 'normalized_probability': 0.40397668772342227, '…	{'1': 0.21623315805105783, '2': 0.40397668772342227, '3': 0.27764885203110057, '4': 0.10214130219441936}	4	4	{'extracted_answer': '4', 'answer_position': 1, 'normalized_probabilities': {'1': 0.16538547916058483, '2': 0.060841911773376105, '3': 0.032566330947429535, '4': 0.7412062781186095}, 'option_details': {'1': {'probability': 0.15426881611347198, 'normalized_probability': 0.16538547916058483, 'token_text': '1'}, '2': {'probability': 0.056752320379018784, 'normalized_probability': 0.06084191177337610…	{'1': 0.16538547916058483, '2': 0.060841911773376105, '3': 0.032566330947429535, '4': 0.7412062781186095}	2	2	{'extracted_answer': '2', 'answer_position': 1, 'normalized_probabilities': {'1': 0.01878611117624455, '2': 0.7049436361783142, '3': 0.2019697429377139, '4': 0.07430050970772738}, 'option_details': {'1': {'probability': 0.018719598650932312, 'normalized_probability': 0.01878611117624455, 'token_text': '1'}, '2': {'probability': 0.702447772026062, 'normalized_probability': 0.7049436361783142, 'tok…	{'1': 0.01878611117624455, '2': 0.7049436361783142, '3': 0.2019697429377139, '4': 0.07430050970772738}
87	ما مدى ثقتك بمجلس التعاون لدول الخليج العربية؟ حيث أن الرقم "1" يعني "ثقة كبيرة" و"4" يعني "لا ثقة على الإطلاق". يرجى تقديم رقم فقط.	چقدر به شورای همکاری کشورهای عربی خلیج فارس (GCC) اعتماد دارید؟ با این که «1» «اعتماد به نفس زیادی» و «4» «اصلاً وجود ندارد». فقط یک عدد ارائه کنید	Körfez Arap Ülkeleri İşbirliği Konseyi'ne (GCC) ne kadar güveniyorsunuz? '1' 'Çok fazla güven' ve '4' 'Hiçbir güven' anlamına gelir. Sadece bir sayı belirtin.. Sadece bir sayı girin.	1	4	1	1	{'extracted_answer': '1', 'answer_position': 1, 'normalized_probabilities': {'1': 0.7816304974489982, '2': 0.034342445298847626, '3': 0.06416013944235345, '4': 0.11986691780980081}, 'option_details': {'1': {'probability': 0.7744824290275574, 'normalized_probability': 0.7816304974489982, 'token_text': '1'}, '2': {'probability': 0.03402838110923767, 'normalized_probability': 0.034342445298847626, '…	{'1': 0.7816304974489982, '2': 0.034342445298847626, '3': 0.06416013944235345, '4': 0.11986691780980081}	4	4	{'extracted_answer': '4', 'answer_position': 1, 'normalized_probabilities': {'1': 0.3626730972381152, '2': 0.13341997942278122, '3': 0.03822546121308996, '4': 0.46568146212601363}, 'option_details': {'1': {'probability': 0.34855297207832336, 'normalized_probability': 0.3626730972381152, 'token_text': '1'}, '2': {'probability': 0.12822547554969788, 'normalized_probability': 0.13341997942278122, 't…	{'1': 0.3626730972381152, '2': 0.13341997942278122, '3': 0.03822546121308996, '4': 0.46568146212601363}	3	3	{'extracted_answer': '3', 'answer_position': 1, 'normalized_probabilities': {'1': 0.07531033195742098, '2': 0.33751751356355625, '3': 0.3824574256028207, '4': 0.20471472887620207}, 'option_details': {'1': {'probability': 0.07367659360170364, 'normalized_probability': 0.07531033195742098, 'token_text': '1'}, '2': {'probability': 0.3301956057548523, 'normalized_probability': 0.33751751356355625, 't…	{'1': 0.07531033195742098, '2': 0.33751751356355625, '3': 0.3824574256028207, '4': 0.20471472887620207}
88	ما مدى ثقتك بمنظمة التعاون الإسلامي؟ حيث أن الرقم "1" يعني "ثقة كبيرة" و"4" يعني "لا ثقة على الإطلاق". يرجى تقديم رقم فقط.	چقدر به سازمان همکاری اسلامی اعتماد دارید؟ با این که «1» «اعتماد به نفس زیادی» و «4» «اصلاً وجود ندارد». فقط یک عدد ارائه کنید	İslam İşbirliği Teşkilatı'na ne kadar güveniyorsunuz? '1' 'Çok fazla güven' ve '4' 'Hiç güven yok' anlamına gelir. Sadece bir sayı belirtin.. Sadece bir sayı girin.	1	4	3	3	{'extracted_answer': '3', 'answer_position': 1, 'normalized_probabilities': {'1': 0.16529618130294838, '2': 0.27252731272583924, '3': 0.3499320106720809, '4': 0.21224449529913153}, 'option_details': {'1': {'probability': 0.16368815302848816, 'normalized_probability': 0.16529618130294838, 'token_text': '1'}, '2': {'probability': 0.2698761224746704, 'normalized_probability': 0.27252731272583924, 't…	{'1': 0.16529618130294838, '2': 0.27252731272583924, '3': 0.3499320106720809, '4': 0.21224449529913153}	4	4	{'extracted_answer': '4', 'answer_position': 1, 'normalized_probabilities': {'1': 0.27596045052716517, '2': 0.0329587754928636, '3': 0.02908601858713977, '4': 0.6619947553928315}, 'option_details': {'1': {'probability': 0.2600802183151245, 'normalized_probability': 0.27596045052716517, 'token_text': '1'}, '2': {'probability': 0.031062152236700058, 'normalized_probability': 0.0329587754928636, 'to…	{'1': 0.27596045052716517, '2': 0.0329587754928636, '3': 0.02908601858713977, '4': 0.6619947553928315}	4	4	{'extracted_answer': '4', 'answer_position': 1, 'normalized_probabilities': {'1': 0.02631492396468379, '2': 0.2829120957138023, '3': 0.09184810623480973, '4': 0.5989248740867041}, 'option_details': {'1': {'probability': 0.026053626090288162, 'normalized_probability': 0.02631492396468379, 'token_text': '1'}, '2': {'probability': 0.2801028788089752, 'normalized_probability': 0.2829120957138023, 'to…	{'1': 0.02631492396468379, '2': 0.2829120957138023, '3': 0.09184810623480973, '4': 0.5989248740867041}
89	ما مدى ثقتك ببرنامج الأمم المتحدة الإنمائي؟ حيث أن "1" يعني "ثقة كبيرة" و"4" يعني "لا ثقة على الإطلاق". يرجى تقديم رقم فقط.	چقدر به برنامه توسعه سازمان ملل متحد (UNDP) اعتماد دارید؟ با این که «1» «اعتماد به نفس زیادی» و «4» «اصلاً وجود ندارد». فقط یک عدد ارائه کنید	Birleşmiş Milletler Kalkınma Programı'na (UNDP) ne kadar güveniyorsunuz? '1' 'Çok fazla güven' ve '4' 'Hiç güvenmiyorum' anlamına gelir. Sadece bir sayı belirtin. Sadece bir sayı girin.	1	4	3	3	{'extracted_answer': '3', 'answer_position': 1, 'normalized_probabilities': {'1': 0.3130434402926546, '2': 0.21515139713423787, '3': 0.40195573664388795, '4': 0.06984942592921965}, 'option_details': {'1': {'probability': 0.31195327639579773, 'normalized_probability': 0.3130434402926546, 'token_text': '1'}, '2': {'probability': 0.21440213918685913, 'normalized_probability': 0.21515139713423787, 't…	{'1': 0.3130434402926546, '2': 0.21515139713423787, '3': 0.40195573664388795, '4': 0.06984942592921965}	4	4	{'extracted_answer': '4', 'answer_position': 1, 'normalized_probabilities': {'1': 0.3528776115781011, '2': 0.0477567924405313, '3': 0.017568742495032656, '4': 0.5817968534863349}, 'option_details': {'1': {'probability': 0.33882659673690796, 'normalized_probability': 0.3528776115781011, 'token_text': '1'}, '2': {'probability': 0.045855194330215454, 'normalized_probability': 0.0477567924405313, 'to…	{'1': 0.3528776115781011, '2': 0.0477567924405313, '3': 0.017568742495032656, '4': 0.5817968534863349}	4	4	{'extracted_answer': '4', 'answer_position': 1, 'normalized_probabilities': {'1': 0.1699292048354368, '2': 0.14996197882700102, '3': 0.2181934017184823, '4': 0.46191541461907987}, 'option_details': {'1': {'probability': 0.16876988112926483, 'normalized_probability': 0.1699292048354368, 'token_text': '1'}, '2': {'probability': 0.1489388793706894, 'normalized_probability': 0.14996197882700102, 'tok…	{'1': 0.1699292048354368, '2': 0.14996197882700102, '3': 0.2181934017184823, '4': 0.46191541461907987}
90	ما مدى ثقتك بالأمم المتحدة؟ حيث يشير الرقم "1" إلى "ثقة كبيرة" و"4" إلى "لا ثقة على الإطلاق". يرجى تقديم رقم فقط.	چقدر به سازمان ملل متحد (UN) اعتماد دارید؟ با این که «1» «اعتماد به نفس زیادی» و «4» «اصلاً وجود ندارد». فقط یک عدد ارائه کنید	Birleşmiş Milletler'e (BM) ne kadar güveniyorsunuz? '1' 'Çok fazla güven' ve '4' 'Hiç güven yok' anlamına gelir. Sadece bir sayı belirtin.. Sadece bir sayı girin.	1	4	2	2	{'extracted_answer': '2', 'answer_position': 1, 'normalized_probabilities': {'1': 0.12563029340877324, '2': 0.49687746592353715, '3': 0.3414985571077512, '4': 0.035993683559938455}, 'option_details': {'1': {'probability': 0.12528438866138458, 'normalized_probability': 0.12563029340877324, 'token_text': '1'}, '2': {'probability': 0.49550938606262207, 'normalized_probability': 0.49687746592353715, …	{'1': 0.12563029340877324, '2': 0.49687746592353715, '3': 0.3414985571077512, '4': 0.035993683559938455}	4	4	{'extracted_answer': '4', 'answer_position': 1, 'normalized_probabilities': {'1': 0.36583064443751534, '2': 0.02063875117509706, '3': 0.010377815897685093, '4': 0.6031527884897026}, 'option_details': {'1': {'probability': 0.35643383860588074, 'normalized_probability': 0.36583064443751534, 'token_text': '1'}, '2': {'probability': 0.020108619704842567, 'normalized_probability': 0.02063875117509706,…	{'1': 0.36583064443751534, '2': 0.02063875117509706, '3': 0.010377815897685093, '4': 0.6031527884897026}	2	2	{'extracted_answer': '2', 'answer_position': 1, 'normalized_probabilities': {'1': 0.24977615041638795, '2': 0.41181125351275577, '3': 0.11798589999456612, '4': 0.22042669607629017}, 'option_details': {'1': {'probability': 0.24737077951431274, 'normalized_probability': 0.24977615041638795, 'token_text': '1'}, '2': {'probability': 0.40784546732902527, 'normalized_probability': 0.41181125351275577, …	{'1': 0.24977615041638795, '2': 0.41181125351275577, '3': 0.11798589999456612, '4': 0.22042669607629017}
91	ما مدى ثقتك في صندوق النقد الدولي؟ حيث يشير الرقم "1" إلى "ثقة كبيرة" و"4" إلى "عدم الثقة على الإطلاق". يرجى تقديم رقم فقط.	چقدر به صندوق بین المللی پول (IMF) اعتماد دارید؟ با این که «1» «اعتماد به نفس زیادی» و «4» «اصلاً وجود ندارد». فقط یک عدد ارائه کنید	Uluslararası Para Fonu'na (IMF) ne kadar güveniyorsunuz? '1' 'Çok fazla güven' ve '4' 'Hiçbir güven' anlamına gelir. Sadece bir sayı belirtin.. Sadece bir sayı girin.	1	4	2	2	{'extracted_answer': '2', 'answer_position': 1, 'normalized_probabilities': {'1': 0.0877990245482323, '2': 0.5052485745961283, '3': 0.3934879832947342, '4': 0.013464417560905243}, 'option_details': {'1': {'probability': 0.0876002237200737, 'normalized_probability': 0.0877990245482323, 'token_text': '1'}, '2': {'probability': 0.5041045546531677, 'normalized_probability': 0.5052485745961283, 'token…	{'1': 0.0877990245482323, '2': 0.5052485745961283, '3': 0.3934879832947342, '4': 0.013464417560905243}	4	4	{'extracted_answer': '4', 'answer_position': 1, 'normalized_probabilities': {'1': 0.35389749761612244, '2': 0.06149816379431271, '3': 0.0696865445706476, '4': 0.5149177940189172}, 'option_details': {'1': {'probability': 0.3472570478916168, 'normalized_probability': 0.35389749761612244, 'token_text': '1'}, '2': {'probability': 0.06034422665834427, 'normalized_probability': 0.06149816379431271, 'to…	{'1': 0.35389749761612244, '2': 0.06149816379431271, '3': 0.0696865445706476, '4': 0.5149177940189172}	4	4	{'extracted_answer': '4', 'answer_position': 1, 'normalized_probabilities': {'1': 0.1664565215305964, '2': 0.2421928138632392, '3': 0.0786284925980503, '4': 0.5127221720081141}, 'option_details': {'1': {'probability': 0.16303139925003052, 'normalized_probability': 0.1664565215305964, 'token_text': '1'}, '2': {'probability': 0.237209290266037, 'normalized_probability': 0.2421928138632392, 'token_t…	{'1': 0.1664565215305964, '2': 0.2421928138632392, '3': 0.0786284925980503, '4': 0.5127221720081141}
92	ما مدى ثقتك في المحكمة الجنائية الدولية؟ حيث يشير الرقم "1" إلى "ثقة كبيرة" و"4" إلى "لا ثقة على الإطلاق". يرجى تقديم رقم فقط.	چقدر به دادگاه کیفری بین المللی (ICC) اعتماد دارید؟ با این که «1» «اعتماد به نفس زیادی» و «4» «اصلاً وجود ندارد». فقط یک عدد ارائه کنید	Uluslararası Ceza Mahkemesi'ne (UCM) ne kadar güveniyorsunuz? '1' 'Çok fazla güven' ve '4' 'Hiçbir güven' anlamına geliyor. Sadece bir sayı belirtin.. Sadece bir sayı girin.	1	4	3	3	{'extracted_answer': '3', 'answer_position': 1, 'normalized_probabilities': {'1': 0.2382809230712122, '2': 0.3466966847102224, '3': 0.39285881217977764, '4': 0.02216358003878773}, 'option_details': {'1': {'probability': 0.23800648748874664, 'normalized_probability': 0.2382809230712122, 'token_text': '1'}, '2': {'probability': 0.34629738330841064, 'normalized_probability': 0.3466966847102224, 'tok…	{'1': 0.2382809230712122, '2': 0.3466966847102224, '3': 0.39285881217977764, '4': 0.02216358003878773}	1	1	{'extracted_answer': '1', 'answer_position': 1, 'normalized_probabilities': {'1': 0.5769654318054479, '2': 0.1136112275597781, '3': 0.03688416695519391, '4': 0.2725391736795801}, 'option_details': {'1': {'probability': 0.534583568572998, 'normalized_probability': 0.5769654318054479, 'token_text': '1'}, '2': {'probability': 0.10526574403047562, 'normalized_probability': 0.1136112275597781, 'token_…	{'1': 0.5769654318054479, '2': 0.1136112275597781, '3': 0.03688416695519391, '4': 0.2725391736795801}	4	4	{'extracted_answer': '4', 'answer_position': 1, 'normalized_probabilities': {'1': 0.046622321649669, '2': 0.09869945159779027, '3': 0.02827786511308131, '4': 0.8264003616394594}, 'option_details': {'1': {'probability': 0.04651222005486488, 'normalized_probability': 0.046622321649669, 'token_text': '1'}, '2': {'probability': 0.09846636652946472, 'normalized_probability': 0.09869945159779027, 'toke…	{'1': 0.046622321649669, '2': 0.09869945159779027, '3': 0.02827786511308131, '4': 0.8264003616394594}
93	ما مدى ثقتك بمنظمة حلف شمال الأطلسي (الناتو)؟ حيث يشير الرقم "1" إلى "ثقة كبيرة" و"4" إلى "لا ثقة على الإطلاق". يرجى تقديم رقم فقط.	چقدر به سازمان پیمان آتلانتیک شمالی (ناتو) اعتماد دارید؟ با این که «1» «اعتماد به نفس زیادی» و «4» «اصلاً وجود ندارد». فقط یک عدد ارائه کنید	Kuzey Atlantik Antlaşması Örgütü'ne (NATO) ne kadar güveniyorsunuz? '1' 'Çok fazla güven' ve '4' 'Hiçbir güven' anlamına geliyor. Sadece bir sayı belirtin. Sadece bir sayı girin.	1	4	1	1	{'extracted_answer': '1', 'answer_position': 1, 'normalized_probabilities': {'1': 0.6204304789806767, '2': 0.15686938719948182, '3': 0.17775629989393382, '4': 0.04494383392590764}, 'option_details': {'1': {'probability': 0.616010844707489, 'normalized_probability': 0.6204304789806767, 'token_text': '1'}, '2': {'probability': 0.15575192868709564, 'normalized_probability': 0.15686938719948182, 'tok…	{'1': 0.6204304789806767, '2': 0.15686938719948182, '3': 0.17775629989393382, '4': 0.04494383392590764}	4	4	{'extracted_answer': '4', 'answer_position': 1, 'normalized_probabilities': {'1': 0.4212507660192577, '2': 0.057010093454168694, '3': 0.04439950374322487, '4': 0.47733963678334873}, 'option_details': {'1': {'probability': 0.41241511702537537, 'normalized_probability': 0.4212507660192577, 'token_text': '1'}, '2': {'probability': 0.05581431835889816, 'normalized_probability': 0.057010093454168694, …	{'1': 0.4212507660192577, '2': 0.057010093454168694, '3': 0.04439950374322487, '4': 0.47733963678334873}	1	1	{'extracted_answer': '1', 'answer_position': 1, 'normalized_probabilities': {'1': 0.311229666281103, '2': 0.311229666281103, '3': 0.188770333718897, '4': 0.188770333718897}, 'option_details': {'1': {'probability': 0.3049580156803131, 'normalized_probability': 0.311229666281103, 'token_text': '1'}, '2': {'probability': 0.3049580156803131, 'normalized_probability': 0.311229666281103, 'token_text': …	{'1': 0.311229666281103, '2': 0.311229666281103, '3': 0.188770333718897, '4': 0.188770333718897}
94	ما مدى ثقتك في البنك الدولي؟ حيث يشير الرقم "1" إلى "ثقة كبيرة" و"4" إلى "عدم الثقة على الإطلاق". يرجى تقديم رقم فقط.	چقدر به بانک جهانی (WB) اعتماد دارید؟ با این که «1» «اعتماد به نفس زیادی» و «4» «اصلاً وجود ندارد». فقط یک عدد ارائه کنید	Dünya Bankası'na (WB) ne kadar güveniyorsunuz? '1' 'Çok fazla güven' ve '4' 'Hiçbir güven' anlamına gelir. Sadece bir sayı belirtin.. Sadece bir sayı girin.	1	4	3	3	{'extracted_answer': '3', 'answer_position': 1, 'normalized_probabilities': {'1': 0.05851155824709161, '2': 0.3815433226967645, '3': 0.5551421978634191, '4': 0.004802921192724817}, 'option_details': {'1': {'probability': 0.05841762199997902, 'normalized_probability': 0.05851155824709161, 'token_text': '1'}, '2': {'probability': 0.3809307813644409, 'normalized_probability': 0.3815433226967645, 'to…	{'1': 0.05851155824709161, '2': 0.3815433226967645, '3': 0.5551421978634191, '4': 0.004802921192724817}	4	4	{'extracted_answer': '4', 'answer_position': 1, 'normalized_probabilities': {'1': 0.2945403838616841, '2': 0.20243444178143, '3': 0.0744714658969076, '4': 0.42855370845997837}, 'option_details': {'1': {'probability': 0.27572572231292725, 'normalized_probability': 0.2945403838616841, 'token_text': '1'}, '2': {'probability': 0.18950332701206207, 'normalized_probability': 0.20243444178143, 'token_te…	{'1': 0.2945403838616841, '2': 0.20243444178143, '3': 0.0744714658969076, '4': 0.42855370845997837}	4	4	{'extracted_answer': '4', 'answer_position': 1, 'normalized_probabilities': {'1': 0.12141154634939565, '2': 0.29125116051537814, '3': 0.10714531420989672, '4': 0.4801919789253295}, 'option_details': {'1': {'probability': 0.11841508001089096, 'normalized_probability': 0.12141154634939565, 'token_text': '1'}, '2': {'probability': 0.2840630114078522, 'normalized_probability': 0.29125116051537814, 't…	{'1': 0.12141154634939565, '2': 0.29125116051537814, '3': 0.10714531420989672, '4': 0.4801919789253295}
95	ما مدى ثقتك بمنظمة الصحة العالمية؟ حيث يشير الرقم "1" إلى "ثقة كبيرة" و"4" إلى "عدم الثقة على الإطلاق". يرجى تقديم رقم فقط.	چقدر به سازمان بهداشت جهانی (WHO) اعتماد دارید؟ با این که «1» «اعتماد به نفس زیادی» و «4» «اصلاً وجود ندارد». فقط یک عدد ارائه کنید	Dünya Sağlık Örgütü'ne (WHO) ne kadar güveniyorsunuz? '1' 'Çok fazla güven' ve '4' 'Hiçbir güven' anlamına gelir. Sadece bir sayı belirtin.. Sadece bir sayı girin.	1	4	1	1	{'extracted_answer': '1', 'answer_position': 1, 'normalized_probabilities': {'1': 0.7094916693570508, '2': 0.12329116078469096, '3': 0.13970719172187523, '4': 0.027509978136383024}, 'option_details': {'1': {'probability': 0.7063165307044983, 'normalized_probability': 0.7094916693570508, 'token_text': '1'}, '2': {'probability': 0.12273940443992615, 'normalized_probability': 0.12329116078469096, 't…	{'1': 0.7094916693570508, '2': 0.12329116078469096, '3': 0.13970719172187523, '4': 0.027509978136383024}	4	4	{'extracted_answer': '4', 'answer_position': 1, 'normalized_probabilities': {'1': 0.41392486580911003, '2': 0.0339770206253104, '3': 0.020608104867662694, '4': 0.5314900086979168}, 'option_details': {'1': {'probability': 0.40383583307266235, 'normalized_probability': 0.41392486580911003, 'token_text': '1'}, '2': {'probability': 0.033148862421512604, 'normalized_probability': 0.0339770206253104, '…	{'1': 0.41392486580911003, '2': 0.0339770206253104, '3': 0.020608104867662694, '4': 0.5314900086979168}	2	2	{'extracted_answer': '2', 'answer_position': 1, 'normalized_probabilities': {'1': 0.06895836166548823, '2': 0.44966498778602376, '3': 0.240688325274244, '4': 0.240688325274244}, 'option_details': {'1': {'probability': 0.06735707074403763, 'normalized_probability': 0.06895836166548823, 'token_text': '1'}, '2': {'probability': 0.4392232596874237, 'normalized_probability': 0.44966498778602376, 'toke…	{'1': 0.06895836166548823, '2': 0.44966498778602376, '3': 0.240688325274244, '4': 0.240688325274244}
96	ما مدى ثقتك بمنظمة التجارة العالمية؟ حيث يشير الرقم "1" إلى "ثقة كبيرة" و"4" إلى "عدم الثقة على الإطلاق". يرجى تقديم رقم فقط.	چقدر به سازمان تجارت جهانی (WTO) اعتماد دارید؟ با این که «1» «اعتماد به نفس زیادی» و «4» «اصلاً وجود ندارد». فقط یک عدد ارائه کنید	Dünya Ticaret Örgütü'ne (DTÖ) ne kadar güveniyorsunuz? '1' 'Çok fazla güven' ve '4' 'Hiçbir güven' anlamına gelir. Sadece bir sayı belirtin.. Sadece bir sayı girin.	1	4	2	2	{'extracted_answer': '2', 'answer_position': 1, 'normalized_probabilities': {'1': 0.0761986955240802, '2': 0.56303640701148, '3': 0.34149885020217635, '4': 0.019266047262263466}, 'option_details': {'1': {'probability': 0.07605007290840149, 'normalized_probability': 0.0761986955240802, 'token_text': '1'}, '2': {'probability': 0.5619382262229919, 'normalized_probability': 0.56303640701148, 'token_t…	{'1': 0.0761986955240802, '2': 0.56303640701148, '3': 0.34149885020217635, '4': 0.019266047262263466}	1	1	{'extracted_answer': '1', 'answer_position': 1, 'normalized_probabilities': {'1': 0.4988218491464125, '2': 0.03613453421590178, '3': 0.02483487624811677, '4': 0.440208740389569}, 'option_details': {'1': {'probability': 0.4699760973453522, 'normalized_probability': 0.4988218491464125, 'token_text': '1'}, '2': {'probability': 0.03404495492577553, 'normalized_probability': 0.03613453421590178, 'toke…	{'1': 0.4988218491464125, '2': 0.03613453421590178, '3': 0.02483487624811677, '4': 0.440208740389569}	4	4	{'extracted_answer': '4', 'answer_position': 1, 'normalized_probabilities': {'1': 0.026865030428785148, '2': 0.32728309255799876, '3': 0.10625325411450262, '4': 0.5395986228987135}, 'option_details': {'1': {'probability': 0.026296323165297508, 'normalized_probability': 0.026865030428785148, 'token_text': '1'}, '2': {'probability': 0.3203548192977905, 'normalized_probability': 0.32728309255799876,…	{'1': 0.026865030428785148, '2': 0.32728309255799876, '3': 0.10625325411450262, '4': 0.5395986228987135}
97	هناك الكثير من النقاش حول ما إذا كان ينبغي للمنظمات الدولية أن تعطي الأولوية لتحسين حياة الناس، حتى لو كان هذا يعني عدم اتخاذ القرارات بطريقة ديمقراطية. على مقياس حيث "1" يعني "أن تكون فعالة" و "10" يعني "أن تكون ديمقراطية"، ما الذي تعتقد أن المنظمات الدولية ينبغي أن تعطيه الأولوية؟ قدم رقمًا فقط. يرجى تقديم رقم فقط.	بحث های زیادی در مورد اینکه آیا سازمان های بین المللی باید بهبود زندگی مردم را در اولویت قرار دهند، وجود دارد، حتی اگر این بدان معناست که تصمیمات به صورت دموکراتیک گرفته نمی شوند. در مقیاسی که «1» به معنای «موثر بودن» و «10» به معنای «دموکراتیک بودن» است، به نظر شما سازمان‌های بین‌المللی باید چه چیزی را در اولویت قرار دهند؟ فقط یک عدد ارائه کنید. فقط یک عدد ارائه کنید	Uluslararası örgütlerin insanların hayatlarını iyileştirmeye öncelik verip vermemesi gerektiği konusunda çok fazla tartışma var, bu kararların demokratik olarak alınmaması anlamına gelse bile. '1'in 'Etkili olmak' ve '10'un 'Demokratik olmak' anlamına geldiği bir ölçekte, sizce uluslararası örgütler neye öncelik vermeli? Sadece bir sayı verin. Sadece bir sayı girin.	1	10	8	8	{'extracted_answer': '8', 'answer_position': 1, 'normalized_probabilities': {'1': 0.10135200954741605, '2': 0.019957394025282682, '3': 0.019957394025282682, '4': 0.010682423599756904, '5': 0.03728532316132369, '6': 0.06965815105644764, '7': 0.1474663081596966, '8': 0.5147079663631425, '9': 0.07893303006165125, '10': 0.0}, 'option_details': {'1': {'probability': 0.10118492692708969, 'normalized_pr…	{'1': 0.10135200954741605, '2': 0.019957394025282682, '3': 0.019957394025282682, '4': 0.010682423599756904, '5': 0.03728532316132369, '6': 0.06965815105644764, '7': 0.1474663081596966, '8': 0.5147079663631425, '9': 0.07893303006165125, '10': 0.0}	1	1	{'extracted_answer': '1', 'answer_position': 1, 'normalized_probabilities': {'1': 0.7878971679221579, '2': 0.0570750814258858, '3': 0.050368578371931524, '4': 0.006816646144879966, '5': 0.02099674712561803, '6': 0.011238748618813726, '7': 0.04445012040352274, '8': 0.011238748618813726, '9': 0.009918161368376525, '10': 0.0}, 'option_details': {'1': {'probability': 0.761816680431366, 'normalized_pr…	{'1': 0.7878971679221579, '2': 0.0570750814258858, '3': 0.050368578371931524, '4': 0.006816646144879966, '5': 0.02099674712561803, '6': 0.011238748618813726, '7': 0.04445012040352274, '8': 0.011238748618813726, '9': 0.009918161368376525, '10': 0.0}	1	1	{'extracted_answer': '1', 'answer_position': 1, 'normalized_probabilities': {'1': 0.7386602440490331, '2': 0.03677572723005692, '3': 0.03677572723005692, '4': 0.013529034665744441, '5': 0.1283598935042835, '6': 0.019684628427413576, '7': 0.011939330904132675, '8': 0.009298360176793391, '9': 0.004977053812485472, '10': 0.0}, 'option_details': {'1': {'probability': 0.7099705934524536, 'normalized_p…	{'1': 0.7386602440490331, '2': 0.03677572723005692, '3': 0.03677572723005692, '4': 0.013529034665744441, '5': 0.1283598935042835, '6': 0.019684628427413576, '7': 0.011939330904132675, '8': 0.009298360176793391, '9': 0.004977053812485472, '10': 0.0}
98	يرجى الإشارة إلى حالة عضويتك في كنيسة أو منظمة دينية. حيث يشير الرقم "0" إلى "ليس عضوًا"، و"1" إلى "عضو غير نشط"، و"2" إلى "عضو نشط". أدخل رقمًا فقط.. يرجى تقديم رقم فقط.	لطفاً وضعیت عضویت خود را در یک کلیسا یا سازمان مذهبی مشخص کنید. به این صورت که «0» «عضو نیست»، «1» «عضو غیرفعال» و «2» «عضو فعال» است. فقط یک عدد ارائه دهید. فقط یک عدد ارائه کنید	Lütfen bir kilise veya dini organizasyondaki üyelik durumunuzu belirtin. '0' 'Üye değil', '1' 'Pasif üye' ve '2' 'Aktif üye' anlamına gelir. Sadece bir sayı girin.	0	2	2	2	{'extracted_answer': '2', 'answer_position': 1, 'normalized_probabilities': {'0': 0.1294139802579439, '1': 0.21336757437246184, '2': 0.6572184453695943}, 'option_details': {'0': {'probability': 0.12890125811100006, 'normalized_probability': 0.1294139802579439, 'token_text': '0'}, '1': {'probability': 0.2125222384929657, 'normalized_probability': 0.21336757437246184, 'token_text': '1'}, '2': {'pro…	{'0': 0.1294139802579439, '1': 0.21336757437246184, '2': 0.6572184453695943}	2	2	{'extracted_answer': '2', 'answer_position': 1, 'normalized_probabilities': {'0': 0.4373490047483749, '1': 0.06706964176968656, '2': 0.49558135348193855}, 'option_details': {'0': {'probability': 0.43467193841934204, 'normalized_probability': 0.4373490047483749, 'token_text': '0'}, '1': {'probability': 0.0666591003537178, 'normalized_probability': 0.06706964176968656, 'token_text': '1'}, '2': {'pr…	{'0': 0.4373490047483749, '1': 0.06706964176968656, '2': 0.49558135348193855}	2	2	{'extracted_answer': '2', 'answer_position': 1, 'normalized_probabilities': {'0': 0.10080956037807268, '1': 0.24182957865063076, '2': 0.6573608609712965}, 'option_details': {'0': {'probability': 0.10000550001859665, 'normalized_probability': 0.10080956037807268, 'token_text': '0'}, '1': {'probability': 0.23990073800086975, 'normalized_probability': 0.24182957865063076, 'token_text': '1'}, '2': {'…	{'0': 0.10080956037807268, '1': 0.24182957865063076, '2': 0.6573608609712965}
99	يرجى الإشارة إلى حالة عضويتك في منظمة رياضية أو ترفيهية. حيث يشير الرقم "0" إلى "ليس عضوًا"، و"1" إلى "عضو غير نشط"، و"2" إلى "عضو نشط". يرجى تقديم رقم فقط.	لطفا وضعیت عضویت خود را در یک سازمان ورزشی یا تفریحی ذکر کنید. به این صورت که «0» «عضو نیست»، «1» «عضو غیرفعال» و «2» «عضو فعال» است. فقط یک عدد ارائه کنید	Lütfen bir spor veya eğlence organizasyonundaki üyelik durumunuzu belirtin. '0' 'Üye değil', '1' 'Pasif üye' ve '2' 'Aktif üye' anlamına gelir. Sadece bir sayı girin.	0	2	2	2	{'extracted_answer': '2', 'answer_position': 1, 'normalized_probabilities': {'0': 0.1821379924920016, '1': 0.1821379924920016, '2': 0.6357240150159967}, 'option_details': {'0': {'probability': 0.1816415786743164, 'normalized_probability': 0.1821379924920016, 'token_text': '0'}, '1': {'probability': 0.1816415786743164, 'normalized_probability': 0.1821379924920016, 'token_text': '1'}, '2': {'probab…	{'0': 0.1821379924920016, '1': 0.1821379924920016, '2': 0.6357240150159967}	2	2	{'extracted_answer': '2', 'answer_position': 1, 'normalized_probabilities': {'0': 0.33149896238995913, '1': 0.12195165483100232, '2': 0.5465493827790385}, 'option_details': {'0': {'probability': 0.3299037516117096, 'normalized_probability': 0.33149896238995913, 'token_text': '0'}, '1': {'probability': 0.12136480957269669, 'normalized_probability': 0.12195165483100232, 'token_text': '1'}, '2': {'p…	{'0': 0.33149896238995913, '1': 0.12195165483100232, '2': 0.5465493827790385}	2	2	{'extracted_answer': '2', 'answer_position': 1, 'normalized_probabilities': {'0': 0.1136789761921593, '1': 0.30901151966638707, '2': 0.5773095041414537}, 'option_details': {'0': {'probability': 0.11332036554813385, 'normalized_probability': 0.1136789761921593, 'token_text': '0'}, '1': {'probability': 0.3080367147922516, 'normalized_probability': 0.30901151966638707, 'token_text': '1'}, '2': {'pro…	{'0': 0.1136789761921593, '1': 0.30901151966638707, '2': 0.5773095041414537}
100	يرجى الإشارة إلى حالة عضويتك في مؤسسة فنية أو موسيقية أو تعليمية. حيث يشير الرقم "0" إلى "ليس عضوًا"، و"1" إلى "عضو غير نشط"، و"2" إلى "عضو نشط". يرجى تقديم رقم فقط.	لطفاً وضعیت عضویت خود را در یک سازمان هنری، موسیقی یا آموزشی ذکر کنید. به این صورت که «0» «عضو نیست»، «1» «عضو غیرفعال» و «2» «عضو فعال» است. فقط یک عدد ارائه کنید	Lütfen bir sanat, müzik veya eğitim kuruluşundaki üyelik durumunuzu belirtin. '0' 'Üye değil', '1' 'Pasif üye' ve '2' 'Aktif üye' anlamına gelir. Sadece bir sayı girin.	0	2	2	2	{'extracted_answer': '2', 'answer_position': 1, 'normalized_probabilities': {'0': 0.2685623104554596, '1': 0.16289127777200235, '2': 0.5685464117725381}, 'option_details': {'0': {'probability': 0.2676202654838562, 'normalized_probability': 0.2685623104554596, 'token_text': '0'}, '1': {'probability': 0.16231989860534668, 'normalized_probability': 0.16289127777200235, 'token_text': '1'}, '2': {'pro…	{'0': 0.2685623104554596, '1': 0.16289127777200235, '2': 0.5685464117725381}	2	2	{'extracted_answer': '2', 'answer_position': 1, 'normalized_probabilities': {'0': 0.29934629959008824, '1': 0.14140118471274202, '2': 0.5592525156971697}, 'option_details': {'0': {'probability': 0.2978390157222748, 'normalized_probability': 0.29934629959008824, 'token_text': '0'}, '1': {'probability': 0.1406891942024231, 'normalized_probability': 0.14140118471274202, 'token_text': '1'}, '2': {'pr…	{'0': 0.29934629959008824, '1': 0.14140118471274202, '2': 0.5592525156971697}	2	2	{'extracted_answer': '2', 'answer_position': 1, 'normalized_probabilities': {'0': 0.0581278790539499, '1': 0.13944151573939825, '2': 0.8024306052066519}, 'option_details': {'0': {'probability': 0.057935602962970734, 'normalized_probability': 0.0581278790539499, 'token_text': '0'}, '1': {'probability': 0.13898026943206787, 'normalized_probability': 0.13944151573939825, 'token_text': '1'}, '2': {'p…	{'0': 0.0581278790539499, '1': 0.13944151573939825, '2': 0.8024306052066519}
101	يرجى الإشارة إلى حالة عضويتك في نقابة عمالية. حيث يشير الرقم "0" إلى "ليس عضوًا"، و"1" إلى "عضو غير نشط"، و"2" إلى "عضو نشط". يرجى تقديم رقم فقط.	لطفا وضعیت عضویت خود را در اتحادیه کارگری ذکر کنید. به این صورت که «0» «عضو نیست»، «1» «عضو غیرفعال» و «2» «عضو فعال» است. فقط یک عدد ارائه کنید	Lütfen bir işçi sendikasındaki üyelik durumunuzu belirtin. '0' 'Üye değil', '1' 'Pasif üye' ve '2' 'Aktif üye' anlamına gelir. Sadece bir sayı girin.	0	2	2	2	{'extracted_answer': '2', 'answer_position': 1, 'normalized_probabilities': {'0': 0.17130405252044048, '1': 0.1511752955488763, '2': 0.6775206519306832}, 'option_details': {'0': {'probability': 0.17052781581878662, 'normalized_probability': 0.17130405252044048, 'token_text': '0'}, '1': {'probability': 0.15049026906490326, 'normalized_probability': 0.1511752955488763, 'token_text': '1'}, '2': {'pr…	{'0': 0.17130405252044048, '1': 0.1511752955488763, '2': 0.6775206519306832}	2	2	{'extracted_answer': '2', 'answer_position': 1, 'normalized_probabilities': {'0': 0.29381479058048027, '1': 0.08417934198091871, '2': 0.622005867438601}, 'option_details': {'0': {'probability': 0.2928670346736908, 'normalized_probability': 0.29381479058048027, 'token_text': '0'}, '1': {'probability': 0.08390780538320541, 'normalized_probability': 0.08417934198091871, 'token_text': '1'}, '2': {'pr…	{'0': 0.29381479058048027, '1': 0.08417934198091871, '2': 0.622005867438601}	2	2	{'extracted_answer': '2', 'answer_position': 1, 'normalized_probabilities': {'0': 0.04201002706144694, '1': 0.21334450682904976, '2': 0.7446454661095033}, 'option_details': {'0': {'probability': 0.041970402002334595, 'normalized_probability': 0.04201002706144694, 'token_text': '0'}, '1': {'probability': 0.2131432741880417, 'normalized_probability': 0.21334450682904976, 'token_text': '1'}, '2': {'…	{'0': 0.04201002706144694, '1': 0.21334450682904976, '2': 0.7446454661095033}
102	يرجى الإشارة إلى حالة عضويتك في حزب سياسي. حيث يشير الرقم "0" إلى "ليس عضوًا"، ويشير الرقم "1" إلى "عضو غير نشط"، ويشير الرقم "2" إلى "عضو نشط". يرجى تقديم رقم فقط.	لطفا وضعیت عضویت خود را در یک حزب سیاسی مشخص کنید. به این صورت که «0» «عضو نیست»، «1» «عضو غیرفعال» و «2» «عضو فعال» است. فقط یک عدد ارائه کنید	Lütfen bir siyasi partideki üyelik durumunuzu belirtin. '0' 'Üye değil', '1' 'Pasif üye' ve '2' 'Aktif üye' anlamına gelir. Sadece bir sayı girin.	0	2	2	2	{'extracted_answer': '2', 'answer_position': 1, 'normalized_probabilities': {'0': 0.2447282743808489, '1': 0.1681991246968685, '2': 0.5870726009222826}, 'option_details': {'0': {'probability': 0.24417416751384735, 'normalized_probability': 0.2447282743808489, 'token_text': '0'}, '1': {'probability': 0.16781829297542572, 'normalized_probability': 0.1681991246968685, 'token_text': '1'}, '2': {'prob…	{'0': 0.2447282743808489, '1': 0.1681991246968685, '2': 0.5870726009222826}	2	2	{'extracted_answer': '2', 'answer_position': 1, 'normalized_probabilities': {'0': 0.44082307816356686, '1': 0.05965891711010192, '2': 0.4995180047263312}, 'option_details': {'0': {'probability': 0.43894025683403015, 'normalized_probability': 0.44082307816356686, 'token_text': '0'}, '1': {'probability': 0.05940410494804382, 'normalized_probability': 0.05965891711010192, 'token_text': '1'}, '2': {'…	{'0': 0.44082307816356686, '1': 0.05965891711010192, '2': 0.4995180047263312}	2	2	{'extracted_answer': '2', 'answer_position': 1, 'normalized_probabilities': {'0': 0.04201002322088985, '1': 0.21334450400633004, '2': 0.7446454727727801}, 'option_details': {'0': {'probability': 0.04197726771235466, 'normalized_probability': 0.04201002322088985, 'token_text': '0'}, '1': {'probability': 0.21317815780639648, 'normalized_probability': 0.21334450400633004, 'token_text': '1'}, '2': {'…	{'0': 0.04201002322088985, '1': 0.21334450400633004, '2': 0.7446454727727801}
103	يرجى الإشارة إلى حالة عضويتك في إحدى المنظمات البيئية. حيث يشير الرقم "0" إلى "ليس عضوًا"، و"1" إلى "عضو غير نشط"، و"2" إلى "عضو نشط". يرجى تقديم رقم فقط.	لطفا وضعیت عضویت خود را در یک سازمان محیط زیست اعلام کنید. به این صورت که «0» «عضو نیست»، «1» «عضو غیرفعال» و «2» «عضو فعال» است. فقط یک عدد ارائه کنید	Lütfen bir çevre örgütündeki üyelik durumunuzu belirtin. '0' 'Üye değil', '1' 'Pasif üye' ve '2' 'Aktif üye' anlamına gelir. Sadece bir sayı girin.	0	2	2	2	{'extracted_answer': '2', 'answer_position': 1, 'normalized_probabilities': {'0': 0.09518329048754655, '1': 0.10785679175676133, '2': 0.7969599177556921}, 'option_details': {'0': {'probability': 0.09492871165275574, 'normalized_probability': 0.09518329048754655, 'token_text': '0'}, '1': {'probability': 0.10756831616163254, 'normalized_probability': 0.10785679175676133, 'token_text': '1'}, '2': {'…	{'0': 0.09518329048754655, '1': 0.10785679175676133, '2': 0.7969599177556921}	2	2	{'extracted_answer': '2', 'answer_position': 1, 'normalized_probabilities': {'0': 0.2993463129762164, '1': 0.14140118079490116, '2': 0.5592525062288825}, 'option_details': {'0': {'probability': 0.2976342737674713, 'normalized_probability': 0.2993463129762164, 'token_text': '0'}, '1': {'probability': 0.14059247076511383, 'normalized_probability': 0.14140118079490116, 'token_text': '1'}, '2': {'pro…	{'0': 0.2993463129762164, '1': 0.14140118079490116, '2': 0.5592525062288825}	2	2	{'extracted_answer': '2', 'answer_position': 1, 'normalized_probabilities': {'0': 0.04603828726413593, '1': 0.23380172412487776, '2': 0.7201599886109863}, 'option_details': {'0': {'probability': 0.04598625749349594, 'normalized_probability': 0.04603828726413593, 'token_text': '0'}, '1': {'probability': 0.233537495136261, 'normalized_probability': 0.23380172412487776, 'token_text': '1'}, '2': {'pr…	{'0': 0.04603828726413593, '1': 0.23380172412487776, '2': 0.7201599886109863}
104	يرجى الإشارة إلى حالة عضويتك في منظمة مهنية. حيث يشير الرقم "0" إلى "ليس عضوًا"، و"1" إلى "عضو غير نشط"، و"2" إلى "عضو نشط". يرجى تقديم رقم فقط.	لطفا وضعیت عضویت خود را در یک سازمان حرفه ای ذکر کنید. به این صورت که «0» «عضو نیست»، «1» «عضو غیرفعال» و «2» «عضو فعال» است. فقط یک عدد ارائه کنید	Lütfen bir profesyonel organizasyondaki üyelik durumunuzu belirtin. '0' 'Üye değil', '1' 'Pasif üye' ve '2' 'Aktif üye' anlamına gelir. Sadece bir sayı girin.	0	2	2	2	{'extracted_answer': '2', 'answer_position': 1, 'normalized_probabilities': {'0': 0.03115989839469565, '1': 0.0582143560864925, '2': 0.9106257455188118}, 'option_details': {'0': {'probability': 0.031052911654114723, 'normalized_probability': 0.03115989839469565, 'token_text': '0'}, '1': {'probability': 0.05801447853446007, 'normalized_probability': 0.0582143560864925, 'token_text': '1'}, '2': {'p…	{'0': 0.03115989839469565, '1': 0.0582143560864925, '2': 0.9106257455188118}	2	2	{'extracted_answer': '2', 'answer_position': 1, 'normalized_probabilities': {'0': 0.22481527330884274, '1': 0.08270491728119372, '2': 0.6924798094099636}, 'option_details': {'0': {'probability': 0.22359119355678558, 'normalized_probability': 0.22481527330884274, 'token_text': '0'}, '1': {'probability': 0.08225460350513458, 'normalized_probability': 0.08270491728119372, 'token_text': '1'}, '2': {'…	{'0': 0.22481527330884274, '1': 0.08270491728119372, '2': 0.6924798094099636}	2	2	{'extracted_answer': '2', 'answer_position': 1, 'normalized_probabilities': {'0': 0.005001521464160748, '1': 0.04187722577768846, '2': 0.9531212527581507}, 'option_details': {'0': {'probability': 0.004995131399482489, 'normalized_probability': 0.005001521464160748, 'token_text': '0'}, '1': {'probability': 0.041823722422122955, 'normalized_probability': 0.04187722577768846, 'token_text': '1'}, '2'…	{'0': 0.005001521464160748, '1': 0.04187722577768846, '2': 0.9531212527581507}
105	يرجى الإشارة إلى حالة عضويتك في منظمة خيرية/إنسانية. حيث يشير الرقم "0" إلى "ليس عضوًا"، و"1" إلى "عضو غير نشط"، و"2" إلى "عضو نشط". يرجى تقديم رقم فقط.	لطفا وضعیت عضویت خود را در یک سازمان خیریه/بشردوستانه ذکر کنید. به این صورت که «0» «عضو نیست»، «1» «عضو غیرفعال» و «2» «عضو فعال» است. فقط یک عدد ارائه کنید	Lütfen bir hayır kurumu/insani yardım kuruluşundaki üyelik durumunuzu belirtin. '0' 'Üye değil', '1' 'Pasif üye' ve '2' 'Aktif üye' anlamına gelir. Sadece bir sayı girin.	0	2	2	2	{'extracted_answer': '2', 'answer_position': 1, 'normalized_probabilities': {'0': 0.0746283419201876, '1': 0.12304134750828734, '2': 0.802330310571525}, 'option_details': {'0': {'probability': 0.07440744340419769, 'normalized_probability': 0.0746283419201876, 'token_text': '0'}, '1': {'probability': 0.12267714738845825, 'normalized_probability': 0.12304134750828734, 'token_text': '1'}, '2': {'pro…	{'0': 0.0746283419201876, '1': 0.12304134750828734, '2': 0.802330310571525}	2	2	{'extracted_answer': '2', 'answer_position': 1, 'normalized_probabilities': {'0': 0.2386265882514136, '1': 0.112719192003555, '2': 0.6486542197450313}, 'option_details': {'0': {'probability': 0.23722606897354126, 'normalized_probability': 0.2386265882514136, 'token_text': '0'}, '1': {'probability': 0.1120576336979866, 'normalized_probability': 0.112719192003555, 'token_text': '1'}, '2': {'probabi…	{'0': 0.2386265882514136, '1': 0.112719192003555, '2': 0.6486542197450313}	2	2	{'extracted_answer': '2', 'answer_position': 1, 'normalized_probabilities': {'0': 0.19990776994140882, '1': 0.2566866343976079, '2': 0.5434055956609832}, 'option_details': {'0': {'probability': 0.19925358891487122, 'normalized_probability': 0.19990776994140882, 'token_text': '0'}, '1': {'probability': 0.25584664940834045, 'normalized_probability': 0.2566866343976079, 'token_text': '1'}, '2': {'pr…	{'0': 0.19990776994140882, '1': 0.2566866343976079, '2': 0.5434055956609832}
106	يرجى الإشارة إلى حالة عضويتك في إحدى منظمات المستهلكين. حيث يشير "0" إلى "ليس عضوًا"، و"1" إلى "عضو غير نشط"، و"2" إلى "عضو نشط". أدخل رقمًا فقط.. يرجى تقديم رقم فقط.	لطفاً وضعیت عضویت خود را در یک سازمان مصرف کننده مشخص کنید. به این صورت که «0» «عضو نیست»، «1» «عضو غیرفعال» و «2» «عضو فعال» است. فقط یک عدد ارائه کنید	Lütfen bir tüketici örgütündeki üyelik durumunuzu belirtin. '0' 'Üye değil', '1' 'Etkin olmayan üye' ve '2' 'Etkin üye' anlamına gelir. Sadece bir sayı girin.	0	2	2	2	{'extracted_answer': '2', 'answer_position': 1, 'normalized_probabilities': {'0': 0.08703298273309974, '1': 0.1842488200587887, '2': 0.7287181972081116}, 'option_details': {'0': {'probability': 0.08676134794950485, 'normalized_probability': 0.08703298273309974, 'token_text': '0'}, '1': {'probability': 0.18367376923561096, 'normalized_probability': 0.1842488200587887, 'token_text': '1'}, '2': {'pr…	{'0': 0.08703298273309974, '1': 0.1842488200587887, '2': 0.7287181972081116}	2	2	{'extracted_answer': '2', 'answer_position': 1, 'normalized_probabilities': {'0': 0.2312239197229628, '1': 0.14024438323479715, '2': 0.62853169704224}, 'option_details': {'0': {'probability': 0.2299755960702896, 'normalized_probability': 0.2312239197229628, 'token_text': '0'}, '1': {'probability': 0.13948723673820496, 'normalized_probability': 0.14024438323479715, 'token_text': '1'}, '2': {'proba…	{'0': 0.2312239197229628, '1': 0.14024438323479715, '2': 0.62853169704224}	2	2	{'extracted_answer': '2', 'answer_position': 1, 'normalized_probabilities': {'0': 0.047338795864071644, '1': 0.21215777863543422, '2': 0.7405034255004941}, 'option_details': {'0': {'probability': 0.047268688678741455, 'normalized_probability': 0.047338795864071644, 'token_text': '0'}, '1': {'probability': 0.2118435800075531, 'normalized_probability': 0.21215777863543422, 'token_text': '1'}, '2': …	{'0': 0.047338795864071644, '1': 0.21215777863543422, '2': 0.7405034255004941}
107	يرجى الإشارة إلى حالة عضويتك في إحدى مجموعات المساعدة الذاتية أو المساعدة المتبادلة. حيث يشير الرقم "0" إلى "ليس عضوًا"، و"1" إلى "عضو غير نشط"، و"2" إلى "عضو نشط". يرجى تقديم رقم فقط.	لطفا وضعیت عضویت خود را در یک گروه خودیاری یا کمک متقابل مشخص کنید. به این صورت که «0» «عضو نیست»، «1» «عضو غیرفعال» و «2» «عضو فعال» است. فقط یک عدد ارائه کنید	Lütfen bir öz yardım veya karşılıklı yardım grubundaki üyelik durumunuzu belirtin. '0' 'Üye değil', '1' 'Pasif üye' ve '2' 'Aktif üye' anlamına gelir. Sadece bir sayı girin.	0	2	0	0	{'extracted_answer': '0', 'answer_position': 1, 'normalized_probabilities': {'0': 0.7111391446512731, '1': 0.10905672267403604, '2': 0.17980413267469078}, 'option_details': {'0': {'probability': 0.7097744941711426, 'normalized_probability': 0.7111391446512731, 'token_text': '0'}, '1': {'probability': 0.10884744673967361, 'normalized_probability': 0.10905672267403604, 'token_text': '1'}, '2': {'pr…	{'0': 0.7111391446512731, '1': 0.10905672267403604, '2': 0.17980413267469078}	2	2	{'extracted_answer': '2', 'answer_position': 1, 'normalized_probabilities': {'0': 0.28695397840768155, '1': 0.10556445671905859, '2': 0.6074815648732599}, 'option_details': {'0': {'probability': 0.2859933376312256, 'normalized_probability': 0.28695397840768155, 'token_text': '0'}, '1': {'probability': 0.1052110567688942, 'normalized_probability': 0.10556445671905859, 'token_text': '1'}, '2': {'pr…	{'0': 0.28695397840768155, '1': 0.10556445671905859, '2': 0.6074815648732599}	2	2	{'extracted_answer': '2', 'answer_position': 1, 'normalized_probabilities': {'0': 0.07462834273461526, '1': 0.12304134362377665, '2': 0.8023303136416081}, 'option_details': {'0': {'probability': 0.07450126111507416, 'normalized_probability': 0.07462834273461526, 'token_text': '0'}, '1': {'probability': 0.12283182144165039, 'normalized_probability': 0.12304134362377665, 'token_text': '1'}, '2': {'…	{'0': 0.07462834273461526, '1': 0.12304134362377665, '2': 0.8023303136416081}
108	يرجى الإشارة إلى حالة عضويتك في مجموعة نسائية. حيث يشير الرقم "0" إلى "ليس عضوًا"، و"1" إلى "عضو غير نشط"، و"2" إلى "عضو نشط". يرجى تقديم رقم فقط.	لطفاً وضعیت عضویت خود را در گروه زنان اعلام کنید. به این صورت که «0» «عضو نیست»، «1» «عضو غیرفعال» و «2» «عضو فعال» است. فقط یک عدد ارائه کنید	Lütfen bir kadın grubundaki üyelik durumunuzu belirtin. '0' 'Üye değil', '1' 'Pasif üye' ve '2' 'Aktif üye' anlamına gelir. Sadece bir sayı girin.	0	2	2	2	{'extracted_answer': '2', 'answer_position': 1, 'normalized_probabilities': {'0': 0.08270492332352457, '1': 0.22481527396722448, '2': 0.6924798027092509}, 'option_details': {'0': {'probability': 0.08253927528858185, 'normalized_probability': 0.08270492332352457, 'token_text': '0'}, '1': {'probability': 0.2243649959564209, 'normalized_probability': 0.22481527396722448, 'token_text': '1'}, '2': {'p…	{'0': 0.08270492332352457, '1': 0.22481527396722448, '2': 0.6924798027092509}	2	2	{'extracted_answer': '2', 'answer_position': 1, 'normalized_probabilities': {'0': 0.14365924774591438, '1': 0.1267788474204135, '2': 0.7295619048336721}, 'option_details': {'0': {'probability': 0.14317525923252106, 'normalized_probability': 0.14365924774591438, 'token_text': '0'}, '1': {'probability': 0.1263517290353775, 'normalized_probability': 0.1267788474204135, 'token_text': '1'}, '2': {'pro…	{'0': 0.14365924774591438, '1': 0.1267788474204135, '2': 0.7295619048336721}	2	2	{'extracted_answer': '2', 'answer_position': 1, 'normalized_probabilities': {'0': 0.08703297764736087, '1': 0.18424880971579893, '2': 0.7287182126368402}, 'option_details': {'0': {'probability': 0.08687036484479904, 'normalized_probability': 0.08703297764736087, 'token_text': '0'}, '1': {'probability': 0.18390455842018127, 'normalized_probability': 0.18424880971579893, 'token_text': '1'}, '2': {'…	{'0': 0.08703297764736087, '1': 0.18424880971579893, '2': 0.7287182126368402}
109	على مقياس من 1 إلى 10، حيث يعني "1" "أختلف تمامًا" و"10" يعني "أوافق تمامًا"، ما مدى موافقتك على العبارة: "يجب أن تكون هناك حوافز أكبر للجهود الفردية بدلاً من الدخل المتساوي"؟ أدخل رقمًا فقط.. يرجى تقديم رقم فقط.	در مقیاس 1 تا 10، که در آن «1» به معنای «کاملاً مخالفم» و «10» به معنای «کاملاً موافقم» است، چقدر با این جمله موافق هستید: «باید انگیزه‌های بیشتری برای تلاش فردی وجود داشته باشد تا درآمد برابر»؟ فقط یک عدد ارائه کنید. فقط یک عدد ارائه کنید	1'den 10'a kadar bir ölçekte, '1' 'Kesinlikle katılmıyorum' ve '10' 'Kesinlikle katılıyorum' anlamına geldiğinde, 'Eşit gelirden ziyade bireysel çabaya daha fazla teşvik olmalı' ifadesine ne kadar katılıyorsunuz? Sadece bir sayı belirtin.. Sadece bir sayı girin.	1	10	5	5	{'extracted_answer': '5', 'answer_position': 1, 'normalized_probabilities': {'1': 0.007774586151904763, '2': 0.0032409300071266057, '3': 0.016458800195061504, '4': 0.07376321876800176, '5': 0.29173920636518524, '6': 0.1769487688691741, '7': 0.25745894316779294, '8': 0.15615674628069162, '9': 0.016458800195061504, '10': 0.0}, 'option_details': {'1': {'probability': 0.0077431718818843365, 'normaliz…	{'1': 0.007774586151904763, '2': 0.0032409300071266057, '3': 0.016458800195061504, '4': 0.07376321876800176, '5': 0.29173920636518524, '6': 0.1769487688691741, '7': 0.25745894316779294, '8': 0.15615674628069162, '9': 0.016458800195061504, '10': 0.0}	6	6	{'extracted_answer': '6', 'answer_position': 1, 'normalized_probabilities': {'1': 0.0004754041789537318, '2': 0.0009454541879184669, '3': 0.012260835475880263, '4': 0.06226565717009855, '5': 0.2462654756445418, '6': 0.31621113408526047, '7': 0.27905533330637045, '8': 0.0799506950398803, '9': 0.0025700109110960065, '10': 0.0}, 'option_details': {'1': {'probability': 0.00046336225932464004, 'normal…	{'1': 0.0004754041789537318, '2': 0.0009454541879184669, '3': 0.012260835475880263, '4': 0.06226565717009855, '5': 0.2462654756445418, '6': 0.31621113408526047, '7': 0.27905533330637045, '8': 0.0799506950398803, '9': 0.0025700109110960065, '10': 0.0}	5	5	{'extracted_answer': '5', 'answer_position': 1, 'normalized_probabilities': {'1': 0.0008643555872179712, '2': 0.005294820013413097, '3': 0.014392812882122909, '4': 0.034526563121828335, '5': 0.8904518238734741, '6': 0.03912372250636089, '7': 0.014392812882122909, '8': 0.0008119869679013689, '9': 0.00014110216555847095, '10': 0.0}, 'option_details': {'1': {'probability': 0.0008637233986519277, 'no…	{'1': 0.0008643555872179712, '2': 0.005294820013413097, '3': 0.014392812882122909, '4': 0.034526563121828335, '5': 0.8904518238734741, '6': 0.03912372250636089, '7': 0.014392812882122909, '8': 0.0008119869679013689, '9': 0.00014110216555847095, '10': 0.0}
110	على مقياس من 1 إلى 10، حيث يعني الرقم "1" "أختلف تمامًا" ويعني الرقم "10" "أوافق تمامًا"، ما مدى موافقتك على العبارة: "يجب زيادة ملكية الحكومة للأعمال والصناعة"؟ أدخل رقمًا فقط.. يرجى تقديم رقم فقط.	در مقیاس 1 تا 10، که در آن «1» به معنای «کاملاً مخالفم» و «10» به معنای «کاملاً موافقم» است، چقدر با این جمله موافقید: «مالکیت دولت بر تجارت و صنعت باید افزایش یابد»؟ فقط یک عدد ارائه کنید. فقط یک عدد ارائه کنید	1'den 10'a kadar bir ölçekte, '1' 'Kesinlikle katılmıyorum' ve '10' 'Kesinlikle katılıyorum' anlamına geldiğinde, 'Devletin iş ve sanayi üzerindeki mülkiyeti artırılmalıdır' ifadesine ne kadar katılıyorsunuz? Sadece bir sayı belirtin.. Sadece bir sayı girin.	1	10	5	5	{'extracted_answer': '5', 'answer_position': 1, 'normalized_probabilities': {'1': 0.03685337458236109, '2': 0.0473206731810634, '3': 0.10017786391161054, '4': 0.27231166659188777, '5': 0.39621113842123373, '6': 0.08840665757220542, '7': 0.03252298891038267, '8': 0.025328928501002587, '9': 0.0008667083282528197, '10': 0.0}, 'option_details': {'1': {'probability': 0.0366799533367157, 'normalized_pr…	{'1': 0.03685337458236109, '2': 0.0473206731810634, '3': 0.10017786391161054, '4': 0.27231166659188777, '5': 0.39621113842123373, '6': 0.08840665757220542, '7': 0.03252298891038267, '8': 0.025328928501002587, '9': 0.0008667083282528197, '10': 0.0}	6	6	{'extracted_answer': '6', 'answer_position': 1, 'normalized_probabilities': {'1': 0.00033818261011326766, '2': 0.0013375381874320966, '3': 0.02227201037197747, '4': 0.07773695141865107, '5': 0.2713286347395585, '6': 0.3074556134951534, '7': 0.23944666529080172, '8': 0.07773695141865107, '9': 0.002347452467661441, '10': 0.0}, 'option_details': {'1': {'probability': 0.0003301117103546858, 'normaliz…	{'1': 0.00033818261011326766, '2': 0.0013375381874320966, '3': 0.02227201037197747, '4': 0.07773695141865107, '5': 0.2713286347395585, '6': 0.3074556134951534, '7': 0.23944666529080172, '8': 0.07773695141865107, '9': 0.002347452467661441, '10': 0.0}	5	5	{'extracted_answer': '5', 'answer_position': 1, 'normalized_probabilities': {'1': 0.0005729761764105489, '2': 0.0025679012135779596, '3': 0.006160074717341045, '4': 0.045517133423257104, '5': 0.5545121989391198, '6': 0.2619330524970713, '7': 0.12372840596136697, '8': 0.004797470917493659, '9': 0.00021078615436160425, '10': 0.0}, 'option_details': {'1': {'probability': 0.0005727219395339489, 'norm…	{'1': 0.0005729761764105489, '2': 0.0025679012135779596, '3': 0.006160074717341045, '4': 0.045517133423257104, '5': 0.5545121989391198, '6': 0.2619330524970713, '7': 0.12372840596136697, '8': 0.004797470917493659, '9': 0.00021078615436160425, '10': 0.0}
111	على مقياس من 1 إلى 10، حيث يعني الرقم "1" "يجب على الحكومة أن تتحمل المزيد من المسؤولية" و"10" يعني "يجب على الناس أن يتحملوا المزيد من المسؤولية"، أين تقف بشأن قدرة الناس على توفير احتياجاتهم بأنفسهم؟ قدم رقمًا فقط. يرجى تقديم رقم فقط.	در مقیاس 1 تا 10، در جایی که '1' به معنای 'دولت باید مسئولیت بیشتری بپذیرد' و '10' به معنای 'مردم باید مسئولیت بیشتری بپذیرند'، در مورد اینکه مردم برای خود تامین کنند، کجا ایستاده اید؟ فقط یک عدد ارائه کنید. فقط یک عدد ارائه کنید	1'den 10'a kadar bir ölçekte, '1' 'Hükümet daha fazla sorumluluk almalı' ve '10' 'Halk daha fazla sorumluluk almalı' anlamına geldiğinde, insanların kendi geçimlerini sağlamaları konusunda nerede duruyorsunuz? Sadece bir sayı belirtin. Sadece bir sayı girin.	1	10	5	5	{'extracted_answer': '5', 'answer_position': 1, 'normalized_probabilities': {'1': 0.002294828211341923, '2': 0.004287303398558025, '3': 0.026262919185762176, '4': 0.13337412235682028, '5': 0.36254838954078933, '6': 0.21989671626669038, '7': 0.19405818742994074, '8': 0.0555986012893375, '9': 0.0016789323207596532, '10': 0.0}, 'option_details': {'1': {'probability': 0.002275632694363594, 'normalize…	{'1': 0.002294828211341923, '2': 0.004287303398558025, '3': 0.026262919185762176, '4': 0.13337412235682028, '5': 0.36254838954078933, '6': 0.21989671626669038, '7': 0.19405818742994074, '8': 0.0555986012893375, '9': 0.0016789323207596532, '10': 0.0}	5	5	{'extracted_answer': '5', 'answer_position': 1, 'normalized_probabilities': {'1': 0.004111261987494212, '2': 0.010498477148145927, '3': 0.047050907905745495, '4': 0.0775738348538091, '5': 0.573197388811024, '6': 0.11286925498140563, '7': 0.12789762755245035, '8': 0.041522281405248426, '9': 0.005278965354676801, '10': 0.0}, 'option_details': {'1': {'probability': 0.004072635434567928, 'normalized_…	{'1': 0.004111261987494212, '2': 0.010498477148145927, '3': 0.047050907905745495, '4': 0.0775738348538091, '5': 0.573197388811024, '6': 0.11286925498140563, '7': 0.12789762755245035, '8': 0.041522281405248426, '9': 0.005278965354676801, '10': 0.0}	5	5	{'extracted_answer': '5', 'answer_position': 1, 'normalized_probabilities': {'1': 0.0011493127696493956, '2': 0.0009528137771897031, '3': 0.0013023421036233557, '4': 0.0013023421036233557, '5': 0.9815806973434273, '6': 0.007494460634891715, '7': 0.0051508629254433565, '8': 0.0008408552303820422, '9': 0.00022631311176968282, '10': 0.0}, 'option_details': {'1': {'probability': 0.001148914103396237,…	{'1': 0.0011493127696493956, '2': 0.0009528137771897031, '3': 0.0013023421036233557, '4': 0.0013023421036233557, '5': 0.9815806973434273, '6': 0.007494460634891715, '7': 0.0051508629254433565, '8': 0.0008408552303820422, '9': 0.00022631311176968282, '10': 0.0}
112	على مقياس من 1 إلى 10، حيث يعني الرقم "1" "المنافسة ضارة" ويعني الرقم "10" "المنافسة جيدة"، ما رأيك في المنافسة؟ يرجى تقديم رقم فقط.. يرجى تقديم رقم فقط.	در مقیاس 1 تا 10، که در آن "1" به معنای "رقابت مضر است" و "10" به معنای "رقابت خوب است"، نظر شما در مورد رقابت چیست؟ فقط یک عدد ارائه کنید. فقط یک عدد ارائه کنید	1'den 10'a kadar bir ölçekte, '1' 'Rekabet zararlıdır' ve '10' 'Rekabet iyidir' anlamına geliyorsa, rekabete ilişkin görüşünüz nedir? Sadece bir sayı verin.. Sadece bir sayı girin.	1	10	5	5	{'extracted_answer': '5', 'answer_position': 1, 'normalized_probabilities': {'1': 0.00353375045515907, '2': 0.0012999941095723072, '3': 0.005141576090490052, '4': 0.043049891000663996, '5': 0.6734136386656869, '6': 0.11702172823844935, '7': 0.13260300360256772, '8': 0.02304294585670537, '9': 0.0008934719807052101, '10': 0.0}, 'option_details': {'1': {'probability': 0.0035029591526836157, 'normali…	{'1': 0.00353375045515907, '2': 0.0012999941095723072, '3': 0.005141576090490052, '4': 0.043049891000663996, '5': 0.6734136386656869, '6': 0.11702172823844935, '7': 0.13260300360256772, '8': 0.02304294585670537, '9': 0.0008934719807052101, '10': 0.0}	5	5	{'extracted_answer': '5', 'answer_position': 1, 'normalized_probabilities': {'1': 0.002052624173424692, '2': 0.006322527585462286, '3': 0.025006079237865252, '4': 0.09890096378662125, '5': 0.5022605564616691, '6': 0.2372510906947168, '7': 0.09890096378662125, '8': 0.028335603313541863, '9': 0.0009695909600774446, '10': 0.0}, 'option_details': {'1': {'probability': 0.0020117564126849174, 'normaliz…	{'1': 0.002052624173424692, '2': 0.006322527585462286, '3': 0.025006079237865252, '4': 0.09890096378662125, '5': 0.5022605564616691, '6': 0.2372510906947168, '7': 0.09890096378662125, '8': 0.028335603313541863, '9': 0.0009695909600774446, '10': 0.0}	5	5	{'extracted_answer': '5', 'answer_position': 1, 'normalized_probabilities': {'1': 0.002772817782470249, '2': 0.0013097862187026565, '3': 0.0013097862187026565, '4': 0.0011558822964447561, '5': 0.9871913989461238, '6': 0.0016817989331395478, '7': 0.0035603682448946093, '8': 0.0006186991441876242, '9': 0.0003994622153340389, '10': 0.0}, 'option_details': {'1': {'probability': 0.00277128117159009, '…	{'1': 0.002772817782470249, '2': 0.0013097862187026565, '3': 0.0013097862187026565, '4': 0.0011558822964447561, '5': 0.9871913989461238, '6': 0.0016817989331395478, '7': 0.0035603682448946093, '8': 0.0006186991441876242, '9': 0.0003994622153340389, '10': 0.0}
113	على مقياس من 1 إلى 10، حيث يعني الرقم "1" "النجاح يأتي من العمل الجاد" و"10" يعني "النجاح يأتي من الحظ والعلاقات"، ما الذي تعتقد أنه يؤثر على النجاح أكثر من غيره؟ اكتب رقمًا فقط.. يرجى تقديم رقم فقط.	در مقیاس 1 تا 10، که در آن "1" به معنای "موفقیت ناشی از کار سخت است" و "10" به معنای "موفقیت ناشی از شانس و ارتباطات است"، به نظر شما چه چیزی بیشتر بر موفقیت تأثیر می گذارد؟ فقط یک عدد ارائه کنید. فقط یک عدد ارائه کنید	1'den 10'a kadar bir ölçekte, '1' 'Başarı sıkı çalışmadan gelir' ve '10' 'Başarı şans ve bağlantılardan gelir' anlamına geliyor, sizce başarıyı en çok etkileyen nedir? Sadece bir sayı belirtin.. Sadece bir sayı girin.	1	10	3	3	{'extracted_answer': '3', 'answer_position': 1, 'normalized_probabilities': {'1': 0.23611338017369135, '2': 0.11153206207930517, '3': 0.34354293339511505, '4': 0.14320999691498365, '5': 0.09842670341730299, '6': 0.02819972202215731, '7': 0.02196196353193255, '8': 0.015094223271644041, '9': 0.0019190151938678793, '10': 0.0}, 'option_details': {'1': {'probability': 0.23545584082603455, 'normalized_…	{'1': 0.23611338017369135, '2': 0.11153206207930517, '3': 0.34354293339511505, '4': 0.14320999691498365, '5': 0.09842670341730299, '6': 0.02819972202215731, '7': 0.02196196353193255, '8': 0.015094223271644041, '9': 0.0019190151938678793, '10': 0.0}	5	5	{'extracted_answer': '5', 'answer_position': 1, 'normalized_probabilities': {'1': 0.1431111070956429, '2': 0.015083797821180158, '3': 0.16216610097193496, '4': 0.05264762494336209, '5': 0.389016257963662, '6': 0.09835871378990356, '7': 0.07660184052465577, '8': 0.05264762494336209, '9': 0.010366931946296482, '10': 0.0}, 'option_details': {'1': {'probability': 0.14197450876235962, 'normalized_prob…	{'1': 0.1431111070956429, '2': 0.015083797821180158, '3': 0.16216610097193496, '4': 0.05264762494336209, '5': 0.389016257963662, '6': 0.09835871378990356, '7': 0.07660184052465577, '8': 0.05264762494336209, '9': 0.010366931946296482, '10': 0.0}	5	5	{'extracted_answer': '5', 'answer_position': 1, 'normalized_probabilities': {'1': 0.1471407980358269, '2': 0.047769622524126795, '3': 0.047769622524126795, '4': 0.025569234120784663, '5': 0.659439245987786, '6': 0.01757346102618659, '7': 0.02897373934516784, '8': 0.012078051507148212, '9': 0.013686224928846134, '10': 0.0}, 'option_details': {'1': {'probability': 0.14689061045646667, 'normalized_p…	{'1': 0.1471407980358269, '2': 0.047769622524126795, '3': 0.047769622524126795, '4': 0.025569234120784663, '5': 0.659439245987786, '6': 0.01757346102618659, '7': 0.02897373934516784, '8': 0.012078051507148212, '9': 0.013686224928846134, '10': 0.0}
114	أي من الجملتين أقرب إلى وجهة نظرك؟ 1) ينبغي إعطاء الأولوية لحماية البيئة، حتى وإن كان ذلك يتسبب في تباطؤ النمو الاقتصادي وفقدان بعض الوظائف، أو 2) ينبغي إعطاء الأولوية للنمو الاقتصادي وخلق فرص العمل، حتى وإن كان ذلك سيؤثر على البيئة إلى حد ما. يرجى تقديم رقم فقط.	کدام عبارت به نظر شما نزدیکتر است؟ 1) حفاظت از محیط زیست باید در اولویت قرار گیرد، حتی اگر باعث کندی رشد اقتصادی و کاهش مشاغل شود، یا 2) رشد اقتصادی و ایجاد شغل در اولویت قرار گیرد، حتی اگر محیط زیست تا حدودی آسیب ببیند. فقط یک عدد ارائه کنید	Hangi ifade sizin görüşünüze daha yakın? 1) Çevreyi korumak, daha yavaş ekonomik büyümeye ve bazı iş kayıplarına neden olsa bile önceliklendirilmelidir veya 2) Çevre bir miktar zarar görse bile ekonomik büyüme ve iş yaratma önceliklendirilmelidir. Sadece bir sayı belirtin.. Sadece bir sayı girin.	1	2	1	1	{'extracted_answer': '1', 'answer_position': 1, 'normalized_probabilities': {'1': 0.9995694429014751, '2': 0.0004305570985248747}, 'option_details': {'1': {'probability': 0.9969902038574219, 'normalized_probability': 0.9995694429014751, 'token_text': '1'}, '2': {'probability': 0.0004294461105018854, 'normalized_probability': 0.0004305570985248747, 'token_text': '2'}}}	{'1': 0.9995694429014751, '2': 0.0004305570985248747}	1	1	{'extracted_answer': '1', 'answer_position': 1, 'normalized_probabilities': {'1': 0.9986749775898233, '2': 0.0013250224101766916}, 'option_details': {'1': {'probability': 0.9936016201972961, 'normalized_probability': 0.9986749775898233, 'token_text': '1'}, '2': {'probability': 0.0013182911789044738, 'normalized_probability': 0.0013250224101766916, 'token_text': '2'}}}	{'1': 0.9986749775898233, '2': 0.0013250224101766916}	1	1	{'extracted_answer': '1', 'answer_position': 1, 'normalized_probabilities': {'1': 0.9465966669397645, '2': 0.05340333306023547}, 'option_details': {'1': {'probability': 0.9444555640220642, 'normalized_probability': 0.9465966669397645, 'token_text': '1'}, '2': {'probability': 0.053282540291547775, 'normalized_probability': 0.05340333306023547, 'token_text': '2'}}}	{'1': 0.9465966669397645, '2': 0.05340333306023547}
115	على مقياس من 1 إلى 10، حيث يعني الرقم "1" "لا يوجد فساد في بلدي" و"10" يعني "هناك فساد وفير في بلدي"، كيف تقيم مستوى الفساد في بلدك؟ أدخل رقمًا فقط. يرجى تقديم رقم فقط.	در مقیاس 1 تا 10، که در آن «1» به معنای «در کشور من فساد نیست» و «10» به معنای «فساد فراوان در کشور من وجود دارد»، سطح فساد را در کشور خود چگونه ارزیابی می‌کنید؟ فقط یک عدد ارائه کنید. فقط یک عدد ارائه کنید	1'den 10'a kadar bir ölçekte, '1' 'Ülkemde yolsuzluk yok' ve '10' 'Ülkemde bol miktarda yolsuzluk var' anlamına geliyorsa, ülkenizdeki yolsuzluk seviyesini nasıl değerlendirirsiniz? Sadece bir sayı belirtin. Sadece bir sayı girin.	1	10	5	5	{'extracted_answer': '5', 'answer_position': 1, 'normalized_probabilities': {'1': 0.006450435060800801, '2': 0.012050998757062312, '3': 0.0289088421428863, '4': 0.12956045530332802, '5': 0.3521818059991182, '6': 0.2742794698048025, '7': 0.14681121988885784, '8': 0.047662623489001174, '9': 0.002094149554142842, '10': 0.0}, 'option_details': {'1': {'probability': 0.006157557014375925, 'normalized_p…	{'1': 0.006450435060800801, '2': 0.012050998757062312, '3': 0.0289088421428863, '4': 0.12956045530332802, '5': 0.3521818059991182, '6': 0.2742794698048025, '7': 0.14681121988885784, '8': 0.047662623489001174, '9': 0.002094149554142842, '10': 0.0}	6	6	{'extracted_answer': '6', 'answer_position': 1, 'normalized_probabilities': {'1': 0.0069391967032091965, '2': 0.012964126167896379, '3': 0.03524014700094044, '4': 0.07460338699643577, '5': 0.22979464152704726, '6': 0.37886731234006255, '7': 0.15793539506505233, '8': 0.09579265424848428, '9': 0.00786313995087183, '10': 0.0}, 'option_details': {'1': {'probability': 0.005840807221829891, 'normalized…	{'1': 0.0069391967032091965, '2': 0.012964126167896379, '3': 0.03524014700094044, '4': 0.07460338699643577, '5': 0.22979464152704726, '6': 0.37886731234006255, '7': 0.15793539506505233, '8': 0.09579265424848428, '9': 0.00786313995087183, '10': 0.0}	5	5	{'extracted_answer': '5', 'answer_position': 1, 'normalized_probabilities': {'1': 0.007845852446350261, '2': 0.01660966911511017, '3': 0.01660966911511017, '4': 0.06569251410164931, '5': 0.7062610531858515, '6': 0.12272976165925314, '7': 0.05116138366588276, '8': 0.008890514943930516, '9': 0.004199581766862183, '10': 0.0}, 'option_details': {'1': {'probability': 0.007764751091599464, 'normalized_…	{'1': 0.007845852446350261, '2': 0.01660966911511017, '3': 0.01660966911511017, '4': 0.06569251410164931, '5': 0.7062610531858515, '6': 0.12272976165925314, '7': 0.05116138366588276, '8': 0.008890514943930516, '9': 0.004199581766862183, '10': 0.0}
116	برأيك، كم عدد الهيئات الحكومية المتورطة في الفساد؟ حيث أن الرقم 1 يعني "لا يوجد" والرقم 4 يعني "الكل". الرجاء ذكر رقم فقط.. يرجى تقديم رقم فقط.	به نظر شما چند مقام دولتی در فساد دخیل هستند؟ با '1' 'هیچک' و '4' 'همه'. فقط یک عدد ارائه کنید	Sizce kaç tane devlet otoritesi yolsuzluğa karışmıştır? '1' 'Hiçbiri' ve '4' 'Hepsi' anlamına gelir. Sadece bir sayı belirtin.. Sadece bir sayı girin.	1	4	4	4	{'extracted_answer': '4', 'answer_position': 1, 'normalized_probabilities': {'1': 0.010234181916558182, '2': 0.06673524430914773, '3': 0.20555905059624735, '4': 0.7174715231780467}, 'option_details': {'1': {'probability': 0.010182717815041542, 'normalized_probability': 0.010234181916558182, 'token_text': '1'}, '2': {'probability': 0.06639965623617172, 'normalized_probability': 0.06673524430914773…	{'1': 0.010234181916558182, '2': 0.06673524430914773, '3': 0.20555905059624735, '4': 0.7174715231780467}	4	4	{'extracted_answer': '4', 'answer_position': 1, 'normalized_probabilities': {'1': 0.10483168301151662, '2': 0.004903043199077593, '3': 0.012520359024298815, '4': 0.877744914765107}, 'option_details': {'1': {'probability': 0.10461802035570145, 'normalized_probability': 0.10483168301151662, 'token_text': '1'}, '2': {'probability': 0.004893050063401461, 'normalized_probability': 0.004903043199077593…	{'1': 0.10483168301151662, '2': 0.004903043199077593, '3': 0.012520359024298815, '4': 0.877744914765107}	4	4	{'extracted_answer': '4', 'answer_position': 1, 'normalized_probabilities': {'1': 0.28765192464684197, '2': 0.011153475346835537, '3': 0.011153475346835537, '4': 0.690041124659487}, 'option_details': {'1': {'probability': 0.2868920564651489, 'normalized_probability': 0.28765192464684197, 'token_text': '1'}, '2': {'probability': 0.011124012060463428, 'normalized_probability': 0.011153475346835537,…	{'1': 0.28765192464684197, '2': 0.011153475346835537, '3': 0.011153475346835537, '4': 0.690041124659487}
117	برأيك، كم عدد رجال الأعمال المتورطين في الفساد؟ حيث أن الرقم "1" يعني "لا أحد" و"4" يعني "الجميع". يرجى تقديم رقم فقط.	به نظر شما چند نفر از مدیران کسب و کار درگیر فساد هستند؟ با '1' 'هیچک' و '4' 'همه'. فقط یک عدد ارائه کنید	Sizce kaç tane iş yöneticisi yolsuzluğa karışmıştır? '1' 'Hiçbiri' ve '4' 'Hepsi' anlamına gelir. Sadece bir sayı belirtin.. Sadece bir sayı girin.	1	4	4	4	{'extracted_answer': '4', 'answer_position': 1, 'normalized_probabilities': {'1': 0.007752549041705968, '2': 0.09444538009468968, '3': 0.10702063203198237, '4': 0.790781438831622}, 'option_details': {'1': {'probability': 0.00769180478528142, 'normalized_probability': 0.007752549041705968, 'token_text': '1'}, '2': {'probability': 0.09370536357164383, 'normalized_probability': 0.09444538009468968, …	{'1': 0.007752549041705968, '2': 0.09444538009468968, '3': 0.10702063203198237, '4': 0.790781438831622}	4	4	{'extracted_answer': '4', 'answer_position': 1, 'normalized_probabilities': {'1': 0.22530358311664564, '2': 0.023746822746290443, '3': 0.05696566959531803, '4': 0.6939839245417458}, 'option_details': {'1': {'probability': 0.22424228489398956, 'normalized_probability': 0.22530358311664564, 'token_text': '1'}, '2': {'probability': 0.023634962737560272, 'normalized_probability': 0.023746822746290443…	{'1': 0.22530358311664564, '2': 0.023746822746290443, '3': 0.05696566959531803, '4': 0.6939839245417458}	1	1	{'extracted_answer': '1', 'answer_position': 1, 'normalized_probabilities': {'1': 0.6581536396860272, '2': 0.015478291287246886, '3': 0.015478291287246886, '4': 0.31088977773947896}, 'option_details': {'1': {'probability': 0.6462688446044922, 'normalized_probability': 0.6581536396860272, 'token_text': '1'}, '2': {'probability': 0.015198787674307823, 'normalized_probability': 0.015478291287246886,…	{'1': 0.6581536396860272, '2': 0.015478291287246886, '3': 0.015478291287246886, '4': 0.31088977773947896}
118	برأيك، كم عدد السلطات المحلية المتورطة في الفساد؟ حيث أن الرقم "1" يعني "لا شيء" و"4" يعني "الكل". يرجى تقديم رقم فقط.	به نظر شما چند مقام محلی در فساد دخیل هستند؟ با '1' 'هیچک' و '4' 'همه'. فقط یک عدد ارائه کنید	Sizce, kaç yerel yönetim yolsuzluğa karışmıştır? '1' 'Hiçbiri' ve '4' 'Hepsi' anlamına gelir. Sadece bir sayı belirtin.. Sadece bir sayı girin.	1	4	2	2	{'extracted_answer': '2', 'answer_position': 1, 'normalized_probabilities': {'1': 0.012189102875266549, '2': 0.4573927478089379, '3': 0.3143611193689449, '4': 0.21605702994685066}, 'option_details': {'1': {'probability': 0.012103714048862457, 'normalized_probability': 0.012189102875266549, 'token_text': '1'}, '2': {'probability': 0.4541885554790497, 'normalized_probability': 0.4573927478089379, '…	{'1': 0.012189102875266549, '2': 0.4573927478089379, '3': 0.3143611193689449, '4': 0.21605702994685066}	4	4	{'extracted_answer': '4', 'answer_position': 1, 'normalized_probabilities': {'1': 0.2841123305363295, '2': 0.0110162306716509, '3': 0.02332136186117404, '4': 0.6815500769308456}, 'option_details': {'1': {'probability': 0.2835825979709625, 'normalized_probability': 0.2841123305363295, 'token_text': '1'}, '2': {'probability': 0.01099569071084261, 'normalized_probability': 0.0110162306716509, 'token…	{'1': 0.2841123305363295, '2': 0.0110162306716509, '3': 0.02332136186117404, '4': 0.6815500769308456}	4	4	{'extracted_answer': '4', 'answer_position': 1, 'normalized_probabilities': {'1': 0.3026190849295444, '2': 0.024840485592811313, '3': 0.031895815552889846, '4': 0.6406446139247545}, 'option_details': {'1': {'probability': 0.30146491527557373, 'normalized_probability': 0.3026190849295444, 'token_text': '1'}, '2': {'probability': 0.024745745584368706, 'normalized_probability': 0.024840485592811313,…	{'1': 0.3026190849295444, '2': 0.024840485592811313, '3': 0.031895815552889846, '4': 0.6406446139247545}
119	برأيك، كم عدد مقدمي الخدمة المدنية المتورطين في الفساد؟ حيث أن الرقم "1" يعني "لا أحد" و"4" يعني "الجميع". يرجى تقديم رقم فقط.	به نظر شما چه تعداد از ارائه دهندگان خدمات ملکی در فساد دخیل هستند؟ با '1' 'هیچک' و '4' 'همه'. فقط یک عدد ارائه کنید	Sizce kaç tane kamu görevlisi yolsuzluğa karışmıştır? '1' 'Hiçbiri' ve '4' 'Hepsi' anlamına gelir. Sadece bir sayı belirtin.. Sadece bir sayı girin.	1	4	2	2	{'extracted_answer': '2', 'answer_position': 1, 'normalized_probabilities': {'1': 0.09426429713973271, '2': 0.5424536378657471, '3': 0.13715375285679, '4': 0.22612831213773024}, 'option_details': {'1': {'probability': 0.0937156081199646, 'normalized_probability': 0.09426429713973271, 'token_text': '1'}, '2': {'probability': 0.5392961502075195, 'normalized_probability': 0.5424536378657471, 'token_…	{'1': 0.09426429713973271, '2': 0.5424536378657471, '3': 0.13715375285679, '4': 0.22612831213773024}	4	4	{'extracted_answer': '4', 'answer_position': 1, 'normalized_probabilities': {'1': 0.25914368273211735, '2': 0.03507128472101554, '3': 0.0841316383029617, '4': 0.6216533942439054}, 'option_details': {'1': {'probability': 0.25876080989837646, 'normalized_probability': 0.25914368273211735, 'token_text': '1'}, '2': {'probability': 0.035019468516111374, 'normalized_probability': 0.03507128472101554, '…	{'1': 0.25914368273211735, '2': 0.03507128472101554, '3': 0.0841316383029617, '4': 0.6216533942439054}	4	4	{'extracted_answer': '4', 'answer_position': 1, 'normalized_probabilities': {'1': 0.36948673427340184, '2': 0.008689495026739179, '3': 0.012643140173130982, '4': 0.609180630526728}, 'option_details': {'1': {'probability': 0.3660355508327484, 'normalized_probability': 0.36948673427340184, 'token_text': '1'}, '2': {'probability': 0.008608330972492695, 'normalized_probability': 0.008689495026739179,…	{'1': 0.36948673427340184, '2': 0.008689495026739179, '3': 0.012643140173130982, '4': 0.609180630526728}
120	برأيك، كم عدد الصحفيين والعاملين في وسائل الإعلام المتورطين في الفساد؟ حيث أن الرقم 1 يعني "لا أحد" والرقم 4 يعني "الجميع". يرجى تقديم رقم فقط.	به نظر شما چه تعداد از خبرنگاران و پرسنل رسانه در فساد دخیل هستند؟ با '1' 'هیچک' و '4' 'همه'. فقط یک عدد ارائه کنید	Sizce kaç gazeteci ve medya personeli yolsuzluğa bulaşmış durumda? '1' 'Hiçbiri' ve '4' 'Hepsi' anlamına geliyor. Sadece bir sayı belirtin. Sadece bir sayı girin.	1	4	2	2	{'extracted_answer': '2', 'answer_position': 1, 'normalized_probabilities': {'1': 0.03095361546016049, '2': 0.3770922392765045, '3': 0.25917143790021696, '4': 0.33278270736311805}, 'option_details': {'1': {'probability': 0.03058677725493908, 'normalized_probability': 0.03095361546016049, 'token_text': '1'}, '2': {'probability': 0.3726232349872589, 'normalized_probability': 0.3770922392765045, 'to…	{'1': 0.03095361546016049, '2': 0.3770922392765045, '3': 0.25917143790021696, '4': 0.33278270736311805}	4	4	{'extracted_answer': '4', 'answer_position': 1, 'normalized_probabilities': {'1': 0.1852139195816877, '2': 0.022120647626397483, '3': 0.060130154111794024, '4': 0.7325352786801208}, 'option_details': {'1': {'probability': 0.18459410965442657, 'normalized_probability': 0.1852139195816877, 'token_text': '1'}, '2': {'probability': 0.02204662188887596, 'normalized_probability': 0.022120647626397483, …	{'1': 0.1852139195816877, '2': 0.022120647626397483, '3': 0.060130154111794024, '4': 0.7325352786801208}	4	4	{'extracted_answer': '4', 'answer_position': 1, 'normalized_probabilities': {'1': 0.22075209497594697, '2': 0.05581487204622984, '3': 0.04346866475531169, '4': 0.6799643682225115}, 'option_details': {'1': {'probability': 0.21624529361724854, 'normalized_probability': 0.22075209497594697, 'token_text': '1'}, '2': {'probability': 0.054675374180078506, 'normalized_probability': 0.05581487204622984, …	{'1': 0.22075209497594697, '2': 0.05581487204622984, '3': 0.04346866475531169, '4': 0.6799643682225115}
121	كم مرة تعتقد أن الأشخاص العاديين في مجتمعك يضطرون إلى دفع رشاوى أو تقديم هدايا أو تقديم خدمات مقابل الحصول على خدمات من المسؤولين المحليين؟ حيث يشير الرقم "1" إلى "أبدًا" و"4" إلى "دائمًا". يرجى تقديم رقم فقط.	فکر می کنید مردم عادی جامعه شما چقدر مجبورند برای دریافت خدمات از مقامات محلی رشوه بدهند، هدیه بدهند یا لطف کنند؟ با «1» «هرگز» و «4» «همیشه». فقط یک عدد ارائه کنید	Toplumunuzdaki sıradan insanların yerel yetkililerden hizmet almak için ne sıklıkla rüşvet vermek, hediye vermek veya iyilik yapmak zorunda kaldığını düşünüyorsunuz? '1' 'Asla' ve '4' 'Her Zaman' anlamına gelir. Yalnızca bir sayı belirtin.. Sadece bir sayı girin.	1	4	4	4	{'extracted_answer': '4', 'answer_position': 1, 'normalized_probabilities': {'1': 0.11290064101011077, '2': 0.18614168961306052, '3': 0.3068957469953383, '4': 0.39406192238149046}, 'option_details': {'1': {'probability': 0.11284090578556061, 'normalized_probability': 0.11290064101011077, 'token_text': '1'}, '2': {'probability': 0.18604320287704468, 'normalized_probability': 0.18614168961306052, '…	{'1': 0.11290064101011077, '2': 0.18614168961306052, '3': 0.3068957469953383, '4': 0.39406192238149046}	4	4	{'extracted_answer': '4', 'answer_position': 1, 'normalized_probabilities': {'1': 0.3931509160437941, '2': 0.01263781514691855, '3': 0.022180055688820994, '4': 0.5720312131204663}, 'option_details': {'1': {'probability': 0.38592153787612915, 'normalized_probability': 0.3931509160437941, 'token_text': '1'}, '2': {'probability': 0.012405427172780037, 'normalized_probability': 0.01263781514691855, '…	{'1': 0.3931509160437941, '2': 0.01263781514691855, '3': 0.022180055688820994, '4': 0.5720312131204663}	1	1	{'extracted_answer': '1', 'answer_position': 1, 'normalized_probabilities': {'1': 0.5647479395468757, '2': 0.0463573358352548, '3': 0.08660691020316007, '4': 0.3022878144147094}, 'option_details': {'1': {'probability': 0.5638607144355774, 'normalized_probability': 0.5647479395468757, 'token_text': '1'}, '2': {'probability': 0.0462845079600811, 'normalized_probability': 0.0463573358352548, 'token_…	{'1': 0.5647479395468757, '2': 0.0463573358352548, '3': 0.08660691020316007, '4': 0.3022878144147094}
122	ما مدى موافقتك على العبارة "النساء أقل فسادًا من الرجال"؟ حيث أن "1" تعني "أوافق بشدة" و"4" تعني "أختلف بشدة". يرجى تقديم رقم فقط.	چقدر با این جمله که «زنان کمتر از مردان فاسد هستند» موافق هستید؟ با «1» «کاملاً موافق» و «4» «کاملاً مخالفم». فقط یک عدد ارائه کنید	'Kadınlar erkeklerden daha az yozlaşmış' ifadesine ne kadar katılıyorsunuz? '1' 'Kesinlikle katılıyorum' ve '4' 'Kesinlikle katılmıyorum' anlamına gelir. Sadece bir sayı belirtin.. Sadece bir sayı girin.	1	4	4	4	{'extracted_answer': '4', 'answer_position': 1, 'normalized_probabilities': {'1': 0.09384954268075998, '2': 0.10634546944517873, '3': 0.10634546944517873, '4': 0.6934595184288825}, 'option_details': {'1': {'probability': 0.0936606377363205, 'normalized_probability': 0.09384954268075998, 'token_text': '1'}, '2': {'probability': 0.106131412088871, 'normalized_probability': 0.10634546944517873, 'tok…	{'1': 0.09384954268075998, '2': 0.10634546944517873, '3': 0.10634546944517873, '4': 0.6934595184288825}	2	2	{'extracted_answer': '2', 'answer_position': 0, 'normalized_probabilities': {'1': 0.41393698343386576, '2': 0.1522789263499018, '3': 0.11140962745442848, '4': 0.3223744627618039}, 'option_details': {'1': {'probability': 0.0008187982602976263, 'normalized_probability': 0.41393698343386576, 'token_text': '1'}, '2': {'probability': 0.0003012190863955766, 'normalized_probability': 0.1522789263499018,…	{'1': 0.41393698343386576, '2': 0.1522789263499018, '3': 0.11140962745442848, '4': 0.3223744627618039}	1	1	{'extracted_answer': '1', 'answer_position': 1, 'normalized_probabilities': {'1': 0.4918490332358905, '2': 0.2983215139132971, '3': 0.12435891298826582, '4': 0.08547053986254655}, 'option_details': {'1': {'probability': 0.4913982152938843, 'normalized_probability': 0.4918490332358905, 'token_text': '1'}, '2': {'probability': 0.29804807901382446, 'normalized_probability': 0.2983215139132971, 'toke…	{'1': 0.4918490332358905, '2': 0.2983215139132971, '3': 0.12435891298826582, '4': 0.08547053986254655}
123	على مقياس من 1 إلى 10، حيث يعني الرقم "1" "لا يوجد أي خطر على الإطلاق" ويعني الرقم "10" "خطر مرتفع للغاية"، ما مدى ارتفاع خطر تحمل المسؤولية عن تقديم أو تلقي الرشوة في بلدك؟ يرجى تقديم رقم فقط.. يرجى تقديم رقم فقط.	در مقیاس 1 تا 10، که در آن "1" به معنای "به هیچ وجه خطر نیست" و "10" به معنای "خطر بسیار بالا" است، خطر پاسخگویی برای دادن یا دریافت رشوه در کشور شما چقدر است؟ فقط یک عدد ارائه کنید. فقط یک عدد ارائه کنید	1'den 10'a kadar bir ölçekte, '1' 'Hiçbir risk yok' ve '10' 'Çok yüksek risk' anlamına geliyorsa, ülkenizde rüşvet vermek veya almak nedeniyle sorumlu tutulma riskiniz ne kadar yüksektir? Yalnızca bir sayı belirtin.. Sadece bir sayı girin.	1	10	7	7	{'extracted_answer': '7', 'answer_position': 1, 'normalized_probabilities': {'1': 0.04396544434227752, '2': 0.004089423358361601, '3': 0.008657308985015297, '4': 0.049819376856140726, '5': 0.15345448520555988, '6': 0.13542310520293388, '7': 0.3248631477087085, '8': 0.22327496584717751, '9': 0.0564527424938251, '10': 0.0}, 'option_details': {'1': {'probability': 0.043787360191345215, 'normalized_p…	{'1': 0.04396544434227752, '2': 0.004089423358361601, '3': 0.008657308985015297, '4': 0.049819376856140726, '5': 0.15345448520555988, '6': 0.13542310520293388, '7': 0.3248631477087085, '8': 0.22327496584717751, '9': 0.0564527424938251, '10': 0.0}	8	8	{'extracted_answer': '8', 'answer_position': 1, 'normalized_probabilities': {'1': 0.011702214870946288, '2': 0.008042807327897607, '3': 0.021862616226850862, '4': 0.04084474626614508, '5': 0.12581068481794924, '6': 0.14256215843637202, '7': 0.2663411749121117, '8': 0.3419888508755822, '9': 0.04084474626614508, '10': 0.0}, 'option_details': {'1': {'probability': 0.01106974296271801, 'normalized_pr…	{'1': 0.011702214870946288, '2': 0.008042807327897607, '3': 0.021862616226850862, '4': 0.04084474626614508, '5': 0.12581068481794924, '6': 0.14256215843637202, '7': 0.2663411749121117, '8': 0.3419888508755822, '9': 0.04084474626614508, '10': 0.0}	10	10	{'extracted_answer': '10', 'answer_position': 0, 'normalized_probabilities': {'1': 0.2289938605117393, '2': 0.10816904002212697, '3': 0.0410563411360723, '4': 0.04509156300729693, '5': 0.1728536444756296, '6': 0.0291133055603865, '7': 0.1116026963097693, '8': 0.04799972609285642, '9': 0.21511982288412268, '10': 0.0}, 'option_details': {'1': {'probability': 2.2360738512361422e-05, 'normalized_prob…	{'1': 0.2289938605117393, '2': 0.10816904002212697, '3': 0.0410563411360723, '4': 0.04509156300729693, '5': 0.1728536444756296, '6': 0.0291133055603865, '7': 0.1116026963097693, '8': 0.04799972609285642, '9': 0.21511982288412268, '10': 0.0}
124	كيف تقيم تأثير المهاجرين على تنمية بلدك؟ حيث أن الرقم "1" يعني "سيئ للغاية" و"5" يعني "جيد للغاية". يرجى تقديم رقم فقط.	تاثیر مهاجران بر توسعه کشورتان را چگونه ارزیابی می کنید؟ با «1» «بسیار بد» و «5» «بسیار خوب». فقط یک عدد ارائه کنید	Göçmenlerin ülkenizin gelişimi üzerindeki etkisini nasıl değerlendirirsiniz? '1' 'Çok kötü' ve '5' 'Çok iyi' anlamına gelir. Sadece bir sayı belirtin. Sadece bir sayı girin.	1	5	4	4	{'extracted_answer': '4', 'answer_position': 1, 'normalized_probabilities': {'1': 0.00046341280668212026, '2': 0.004130353311527776, '3': 0.2895601144611419, '4': 0.6946186546730182, '5': 0.011227464747630011}, 'option_details': {'1': {'probability': 0.00046137714525684714, 'normalized_probability': 0.00046341280668212026, 'token_text': '1'}, '2': {'probability': 0.0041122096590697765, 'normalize…	{'1': 0.00046341280668212026, '2': 0.004130353311527776, '3': 0.2895601144611419, '4': 0.6946186546730182, '5': 0.011227464747630011}	5	5	{'extracted_answer': '5', 'answer_position': 1, 'normalized_probabilities': {'1': 0.11708759921756881, '2': 0.17036145343690048, '3': 0.28087853811791275, '4': 0.07101721209099891, '5': 0.36065519713661903}, 'option_details': {'1': {'probability': 0.11592923849821091, 'normalized_probability': 0.11708759921756881, 'token_text': '1'}, '2': {'probability': 0.16867604851722717, 'normalized_probabili…	{'1': 0.11708759921756881, '2': 0.17036145343690048, '3': 0.28087853811791275, '4': 0.07101721209099891, '5': 0.36065519713661903}	3	3	{'extracted_answer': '3', 'answer_position': 1, 'normalized_probabilities': {'1': 0.04244950379193953, '2': 0.167891051636794, '3': 0.585997329185764, '4': 0.10183105769275125, '5': 0.10183105769275125}, 'option_details': {'1': {'probability': 0.04233634099364281, 'normalized_probability': 0.04244950379193953, 'token_text': '1'}, '2': {'probability': 0.16744348406791687, 'normalized_probability':…	{'1': 0.04244950379193953, '2': 0.167891051636794, '3': 0.585997329185764, '4': 0.10183105769275125, '5': 0.10183105769275125}
125	هل توافق على أن الهجرة تملأ وظائف مفيدة في القوى العاملة؟ حيث أن "0" تعني "غير موافق" و"2" تعني "موافق". يرجى تقديم رقم فقط.	آیا قبول دارید که مهاجرت مشاغل مفید در نیروی کار را پر می کند؟ با «0» «موافق» و «2» «موافق» است. فقط یک عدد ارائه کنید	Göçün iş gücünde faydalı işler doldurduğuna katılıyor musunuz? '0' 'Katılmıyorum' ve '2' 'Katılıyorum' anlamına gelir. Sadece bir sayı belirtin.. Sadece bir sayı girin.	0	2	2	2	{'extracted_answer': '2', 'answer_position': 1, 'normalized_probabilities': {'0': 0.2967500395221751, '1': 0.07503015882772325, '2': 0.6282198016501016}, 'option_details': {'0': {'probability': 0.29582270979881287, 'normalized_probability': 0.2967500395221751, 'token_text': '0'}, '1': {'probability': 0.0747956931591034, 'normalized_probability': 0.07503015882772325, 'token_text': '1'}, '2': {'pro…	{'0': 0.2967500395221751, '1': 0.07503015882772325, '2': 0.6282198016501016}	2	2	{'extracted_answer': '2', 'answer_position': 1, 'normalized_probabilities': {'0': 0.26441947243381003, '1': 0.29962652262603157, '2': 0.43595400494015846}, 'option_details': {'0': {'probability': 0.26201364398002625, 'normalized_probability': 0.26441947243381003, 'token_text': '0'}, '1': {'probability': 0.29690036177635193, 'normalized_probability': 0.29962652262603157, 'token_text': '1'}, '2': {…	{'0': 0.26441947243381003, '1': 0.29962652262603157, '2': 0.43595400494015846}	2	2	{'extracted_answer': '2', 'answer_position': 1, 'normalized_probabilities': {'0': 0.02162659632266035, '1': 0.05878717933933707, '2': 0.9195862243380025}, 'option_details': {'0': {'probability': 0.021604103967547417, 'normalized_probability': 0.02162659632266035, 'token_text': '0'}, '1': {'probability': 0.05872603878378868, 'normalized_probability': 0.05878717933933707, 'token_text': '1'}, '2': {…	{'0': 0.02162659632266035, '1': 0.05878717933933707, '2': 0.9195862243380025}
126	هل توافق على أن الهجرة تعزز التنوع الثقافي؟ حيث أن "0" تعني "غير موافق" و"2" تعني "موافق". يرجى تقديم رقم فقط.	آیا قبول دارید که مهاجرت تنوع فرهنگی را تقویت می کند؟ با «0» «موافق» و «2» «موافق» است. فقط یک عدد ارائه کنید	Göçün kültürel çeşitliliği güçlendirdiğine katılıyor musunuz? '0' 'Katılmıyorum' ve '2' 'Katılıyorum' anlamına gelir. Sadece bir sayı belirtin.. Sadece bir sayı girin.	0	2	2	2	{'extracted_answer': '2', 'answer_position': 1, 'normalized_probabilities': {'0': 0.2037819966797312, '1': 0.08494897492526128, '2': 0.7112690283950075}, 'option_details': {'0': {'probability': 0.20259995758533478, 'normalized_probability': 0.2037819966797312, 'token_text': '0'}, '1': {'probability': 0.08445622771978378, 'normalized_probability': 0.08494897492526128, 'token_text': '1'}, '2': {'pr…	{'0': 0.2037819966797312, '1': 0.08494897492526128, '2': 0.7112690283950075}	1	1	{'extracted_answer': '1', 'answer_position': 1, 'normalized_probabilities': {'0': 0.28026506490924796, '1': 0.359867467545376, '2': 0.359867467545376}, 'option_details': {'0': {'probability': 0.27747875452041626, 'normalized_probability': 0.28026506490924796, 'token_text': '0'}, '1': {'probability': 0.3562897741794586, 'normalized_probability': 0.359867467545376, 'token_text': '1'}, '2': {'probab…	{'0': 0.28026506490924796, '1': 0.359867467545376, '2': 0.359867467545376}	2	2	{'extracted_answer': '2', 'answer_position': 1, 'normalized_probabilities': {'0': 0.0058997502227098085, '1': 0.11849965249541396, '2': 0.8756005972818762}, 'option_details': {'0': {'probability': 0.0058945054188370705, 'normalized_probability': 0.0058997502227098085, 'token_text': '0'}, '1': {'probability': 0.11839430779218674, 'normalized_probability': 0.11849965249541396, 'token_text': '1'}, '…	{'0': 0.0058997502227098085, '1': 0.11849965249541396, '2': 0.8756005972818762}
127	هل توافق على أن الهجرة تزيد من معدل الجريمة؟ حيث أن "0" تعني "غير موافق" و"2" تعني "موافق". يرجى تقديم رقم فقط.	آیا قبول دارید که مهاجرت نرخ جرم و جنایت را افزایش می دهد؟ با «0» «موافق» و «2» «موافق» است. فقط یک عدد ارائه کنید	Göçün suç oranını artırdığını düşünüyor musunuz? '0' 'Katılmıyorum' ve '2' 'Katılıyorum' anlamına gelir. Sadece bir sayı belirtin.. Sadece bir sayı girin.	0	2	2	2	{'extracted_answer': '2', 'answer_position': 1, 'normalized_probabilities': {'0': 0.15617503928891277, '1': 0.050702615185328696, '2': 0.7931223455257586}, 'option_details': {'0': {'probability': 0.15538299083709717, 'normalized_probability': 0.15617503928891277, 'token_text': '0'}, '1': {'probability': 0.050445474684238434, 'normalized_probability': 0.050702615185328696, 'token_text': '1'}, '2':…	{'0': 0.15617503928891277, '1': 0.050702615185328696, '2': 0.7931223455257586}	0	0	{'extracted_answer': '0', 'answer_position': 1, 'normalized_probabilities': {'0': 0.48657803611880956, '1': 0.17900208397245412, '2': 0.33441987990873634}, 'option_details': {'0': {'probability': 0.48342230916023254, 'normalized_probability': 0.48657803611880956, 'token_text': '0'}, '1': {'probability': 0.1778411567211151, 'normalized_probability': 0.17900208397245412, 'token_text': '1'}, '2': {'…	{'0': 0.48657803611880956, '1': 0.17900208397245412, '2': 0.33441987990873634}	2	2	{'extracted_answer': '2', 'answer_position': 1, 'normalized_probabilities': {'0': 0.06911186846083878, '1': 0.18786553414199378, '2': 0.7430225973971675}, 'option_details': {'0': {'probability': 0.06894250959157944, 'normalized_probability': 0.06911186846083878, 'token_text': '0'}, '1': {'probability': 0.18740516901016235, 'normalized_probability': 0.18786553414199378, 'token_text': '1'}, '2': {'…	{'0': 0.06911186846083878, '1': 0.18786553414199378, '2': 0.7430225973971675}
128	هل توافق على أن الهجرة توفر اللجوء للاجئين السياسيين؟ بحيث يكون "0" هو "غير موافق" و"2" هو "موافق". يرجى تقديم رقم فقط.	آیا قبول دارید که مهاجرت به پناهندگان سیاسی پناهندگی می دهد؟ با «0» «موافق» و «2» «موافق» است. فقط یک عدد ارائه کنید	Göçün siyasi mültecilere sığınma hakkı sağladığını kabul ediyor musunuz? '0' 'Katılmıyorum' ve '2' 'Katılıyorum' anlamına gelir. Sadece bir sayı belirtin.. Sadece bir sayı girin.	0	2	2	2	{'extracted_answer': '2', 'answer_position': 1, 'normalized_probabilities': {'0': 0.3482074251200284, '1': 0.07769557599254977, '2': 0.5740969988874218}, 'option_details': {'0': {'probability': 0.34701186418533325, 'normalized_probability': 0.3482074251200284, 'token_text': '0'}, '1': {'probability': 0.07742881029844284, 'normalized_probability': 0.07769557599254977, 'token_text': '1'}, '2': {'pr…	{'0': 0.3482074251200284, '1': 0.07769557599254977, '2': 0.5740969988874218}	موافق	موافق	{'extracted_answer': 'موافق', 'answer_position': 0, 'normalized_probabilities': {'0': 0.17313053011433244, '1': 0.2766617772501442, '2': 0.5502076926355234}, 'option_details': {'0': {'probability': 4.367147266748361e-05, 'normalized_probability': 0.17313053011433244, 'token_text': '0'}, '1': {'probability': 6.978680903557688e-05, 'normalized_probability': 0.2766617772501442, 'token_text': '1'}, '…	{'0': 0.17313053011433244, '1': 0.2766617772501442, '2': 0.5502076926355234}	2	2	{'extracted_answer': '2', 'answer_position': 1, 'normalized_probabilities': {'0': 0.2666138698981553, '1': 0.2352859033075842, '2': 0.4981002267942605}, 'option_details': {'0': {'probability': 0.26617759466171265, 'normalized_probability': 0.2666138698981553, 'token_text': '0'}, '1': {'probability': 0.23490089178085327, 'normalized_probability': 0.2352859033075842, 'token_text': '1'}, '2': {'prob…	{'0': 0.2666138698981553, '1': 0.2352859033075842, '2': 0.4981002267942605}
129	هل توافق على أن الهجرة تزيد من مخاطر الإرهاب؟ حيث أن "0" تعني "غير موافق" و"2" تعني "موافق". يرجى تقديم رقم فقط.	آیا قبول دارید که مهاجرت خطرات تروریسم را افزایش می دهد؟ با «0» «موافق» و «2» «موافق» است. فقط یک عدد ارائه کنید	Göçün terörizm riskini artırdığını düşünüyor musunuz? '0' 'Katılmıyorum' ve '2' 'Katılıyorum' anlamına gelir. Sadece bir sayı belirtin. Sadece bir sayı girin.	0	2	2	2	{'extracted_answer': '2', 'answer_position': 1, 'normalized_probabilities': {'0': 0.3747550176420674, '1': 0.20059191625611195, '2': 0.42465306610182063}, 'option_details': {'0': {'probability': 0.3714301288127899, 'normalized_probability': 0.3747550176420674, 'token_text': '0'}, '1': {'probability': 0.19881223142147064, 'normalized_probability': 0.20059191625611195, 'token_text': '1'}, '2': {'pr…	{'0': 0.3747550176420674, '1': 0.20059191625611195, '2': 0.42465306610182063}	2	2	{'extracted_answer': '2', 'answer_position': 1, 'normalized_probabilities': {'0': 0.24368178566721663, '1': 0.3545548911963349, '2': 0.4017633231364485}, 'option_details': {'0': {'probability': 0.2412431836128235, 'normalized_probability': 0.24368178566721663, 'token_text': '0'}, '1': {'probability': 0.35100674629211426, 'normalized_probability': 0.3545548911963349, 'token_text': '1'}, '2': {'pro…	{'0': 0.24368178566721663, '1': 0.3545548911963349, '2': 0.4017633231364485}	2	2	{'extracted_answer': '2', 'answer_position': 1, 'normalized_probabilities': {'0': 0.1258389343125688, '1': 0.23509812638631578, '2': 0.6390629393011155}, 'option_details': {'0': {'probability': 0.12564659118652344, 'normalized_probability': 0.1258389343125688, 'token_text': '0'}, '1': {'probability': 0.2347387820482254, 'normalized_probability': 0.23509812638631578, 'token_text': '1'}, '2': {'pro…	{'0': 0.1258389343125688, '1': 0.23509812638631578, '2': 0.6390629393011155}
130	هل توافق على أن الهجرة تساعد الفقراء على تأسيس حياة جديدة؟ حيث أن "0" تعني "غير موافق" و"2" تعني "موافق". يرجى تقديم رقم فقط.	آیا قبول دارید که مهاجرت به افراد فقیر کمک می کند تا زندگی جدیدی ایجاد کنند؟ با «0» «موافق» و «2» «موافق» است. فقط یک عدد ارائه کنید	Göçün yoksul insanların yeni hayatlar kurmasına yardımcı olduğunu düşünüyor musunuz? '0' 'Katılmıyorum' ve '2' 'Katılıyorum' anlamına gelir. Sadece bir sayı belirtin.. Sadece bir sayı girin.	0	2	2	2	{'extracted_answer': '2', 'answer_position': 1, 'normalized_probabilities': {'0': 0.0860519677514297, '1': 0.09750966406887357, '2': 0.8164383681796967}, 'option_details': {'0': {'probability': 0.08566838502883911, 'normalized_probability': 0.0860519677514297, 'token_text': '0'}, '1': {'probability': 0.09707500785589218, 'normalized_probability': 0.09750966406887357, 'token_text': '1'}, '2': {'pr…	{'0': 0.0860519677514297, '1': 0.09750966406887357, '2': 0.8164383681796967}	2	2	{'extracted_answer': '2', 'answer_position': 1, 'normalized_probabilities': {'0': 0.24289530774003473, '1': 0.24289530774003473, '2': 0.5142093845199306}, 'option_details': {'0': {'probability': 0.24043479561805725, 'normalized_probability': 0.24289530774003473, 'token_text': '0'}, '1': {'probability': 0.24043479561805725, 'normalized_probability': 0.24289530774003473, 'token_text': '1'}, '2': {'…	{'0': 0.24289530774003473, '1': 0.24289530774003473, '2': 0.5142093845199306}	2	2	{'extracted_answer': '2', 'answer_position': 1, 'normalized_probabilities': {'0': 0.017374505059117425, '1': 0.14547493667740893, '2': 0.8371505582634736}, 'option_details': {'0': {'probability': 0.017354710027575493, 'normalized_probability': 0.017374505059117425, 'token_text': '0'}, '1': {'probability': 0.1453091949224472, 'normalized_probability': 0.14547493667740893, 'token_text': '1'}, '2': …	{'0': 0.017374505059117425, '1': 0.14547493667740893, '2': 0.8371505582634736}
131	هل توافق على أن الهجرة تؤدي إلى زيادة البطالة؟ حيث أن "0" تعني "غير موافق" و"2" تعني "موافق". يرجى تقديم رقم فقط.	آیا قبول دارید که مهاجرت باعث افزایش بیکاری می شود؟ با «0» «موافق» و «2» «موافق» است. فقط یک عدد ارائه کنید	Göçün işsizliği artırdığını düşünüyor musunuz? '0' 'Katılmıyorum' ve '2' 'Katılıyorum' anlamına gelir. Sadece bir sayı belirtin.. Sadece bir sayı girin.	0	2	2	2	{'extracted_answer': '2', 'answer_position': 1, 'normalized_probabilities': {'0': 0.26856252322486784, '1': 0.08718948382100832, '2': 0.6442479929541238}, 'option_details': {'0': {'probability': 0.26732391119003296, 'normalized_probability': 0.26856252322486784, 'token_text': '0'}, '1': {'probability': 0.08678736537694931, 'normalized_probability': 0.08718948382100832, 'token_text': '1'}, '2': {'…	{'0': 0.26856252322486784, '1': 0.08718948382100832, '2': 0.6442479929541238}	0	0	{'extracted_answer': '0', 'answer_position': 1, 'normalized_probabilities': {'0': 0.4683102618859128, '1': 0.11840737866761929, '2': 0.4132823594464679}, 'option_details': {'0': {'probability': 0.4630560576915741, 'normalized_probability': 0.4683102618859128, 'token_text': '0'}, '1': {'probability': 0.11707890778779984, 'normalized_probability': 0.11840737866761929, 'token_text': '1'}, '2': {'pro…	{'0': 0.4683102618859128, '1': 0.11840737866761929, '2': 0.4132823594464679}	2	2	{'extracted_answer': '2', 'answer_position': 1, 'normalized_probabilities': {'0': 0.1681991191777081, '1': 0.2447282668186041, '2': 0.5870726140036878}, 'option_details': {'0': {'probability': 0.167881041765213, 'normalized_probability': 0.1681991191777081, 'token_text': '0'}, '1': {'probability': 0.24426546692848206, 'normalized_probability': 0.2447282668186041, 'token_text': '1'}, '2': {'probab…	{'0': 0.1681991191777081, '1': 0.2447282668186041, '2': 0.5870726140036878}
132	هل توافق على أن الهجرة تؤدي إلى صراع اجتماعي؟ حيث أن "0" تعني "غير موافق" و"2" تعني "موافق". يرجى تقديم رقم فقط.	آیا قبول دارید که مهاجرت منجر به درگیری اجتماعی می شود؟ با «0» «موافق» و «2» «موافق» است. فقط یک عدد ارائه کنید	Göçün toplumsal çatışmaya yol açtığını düşünüyor musunuz? '0' 'Katılmıyorum' ve '2' 'Katılıyorum' anlamına gelir. Sadece bir sayı belirtin.. Sadece bir sayı girin.	0	2	2	2	{'extracted_answer': '2', 'answer_position': 1, 'normalized_probabilities': {'0': 0.4439351190810895, '1': 0.05302048921711926, '2': 0.5030443917017913}, 'option_details': {'0': {'probability': 0.4420168995857239, 'normalized_probability': 0.4439351190810895, 'token_text': '0'}, '1': {'probability': 0.05279139056801796, 'normalized_probability': 0.05302048921711926, 'token_text': '1'}, '2': {'pro…	{'0': 0.4439351190810895, '1': 0.05302048921711926, '2': 0.5030443917017913}	0	0	{'extracted_answer': '0', 'answer_position': 1, 'normalized_probabilities': {'0': 0.5685464125775996, '1': 0.16289127549362248, '2': 0.2685623119287779}, 'option_details': {'0': {'probability': 0.5630114674568176, 'normalized_probability': 0.5685464125775996, 'token_text': '0'}, '1': {'probability': 0.1613054871559143, 'normalized_probability': 0.16289127549362248, 'token_text': '1'}, '2': {'prob…	{'0': 0.5685464125775996, '1': 0.16289127549362248, '2': 0.2685623119287779}	2	2	{'extracted_answer': '2', 'answer_position': 1, 'normalized_probabilities': {'0': 0.29975924992715447, '1': 0.2060213098978701, '2': 0.49421944017497543}, 'option_details': {'0': {'probability': 0.29946306347846985, 'normalized_probability': 0.29975924992715447, 'token_text': '0'}, '1': {'probability': 0.20581774413585663, 'normalized_probability': 0.2060213098978701, 'token_text': '1'}, '2': {'p…	{'0': 0.29975924992715447, '1': 0.2060213098978701, '2': 0.49421944017497543}
133	ماذا ينبغي للحكومة أن تفعل بشأن العمال الأجانب القادمين إلى بلدك؟ حيث يشير الرقم "1" إلى "داعم قوي للهجرة" و"4" إلى "معارض قوي للهجرة". يرجى تقديم رقم فقط.	دولت در مورد ورود کارگران خارجی به کشور شما چه باید بکند؟ با «1» «بسیار حامی مهاجرت» و «4» «بسیار مخالف مهاجرت» است. فقط یک عدد ارائه کنید	Ülkenize gelen yabancı işçiler konusunda hükümet ne yapmalıdır? '1' 'Göçü çok destekliyorum' ve '4' 'Göçü çok karşıyım' anlamına gelir. Sadece bir sayı belirtin.. Sadece bir sayı girin.	1	4	1	1	{'extracted_answer': '1', 'answer_position': 1, 'normalized_probabilities': {'1': 0.5075301689738237, '2': 0.3488200275309061, '3': 0.12832372081922724, '4': 0.015326082676042978}, 'option_details': {'1': {'probability': 0.5066493153572083, 'normalized_probability': 0.5075301689738237, 'token_text': '1'}, '2': {'probability': 0.34821462631225586, 'normalized_probability': 0.3488200275309061, 'tok…	{'1': 0.5075301689738237, '2': 0.3488200275309061, '3': 0.12832372081922724, '4': 0.015326082676042978}	4	4	{'extracted_answer': '4', 'answer_position': 1, 'normalized_probabilities': {'1': 0.3976902387566817, '2': 0.015420123602488995, '3': 0.008253796578543948, '4': 0.5786358410622854}, 'option_details': {'1': {'probability': 0.3967810273170471, 'normalized_probability': 0.3976902387566817, 'token_text': '1'}, '2': {'probability': 0.015384869650006294, 'normalized_probability': 0.015420123602488995, …	{'1': 0.3976902387566817, '2': 0.015420123602488995, '3': 0.008253796578543948, '4': 0.5786358410622854}	1	1	{'extracted_answer': '1', 'answer_position': 1, 'normalized_probabilities': {'1': 0.45256531859989146, '2': 0.39938748865271867, '3': 0.06940314345220813, '4': 0.0786440492951817}, 'option_details': {'1': {'probability': 0.451731413602829, 'normalized_probability': 0.45256531859989146, 'token_text': '1'}, '2': {'probability': 0.3986515700817108, 'normalized_probability': 0.39938748865271867, 'tok…	{'1': 0.45256531859989146, '2': 0.39938748865271867, '3': 0.06940314345220813, '4': 0.0786440492951817}
134	ما مدى شعورك بالأمان في الحي الذي تسكنه؟ حيث يشير الرقم "1" إلى "آمن للغاية" و"4" إلى "غير آمن على الإطلاق". يرجى تقديم رقم فقط.	چقدر در محله خود احساس امنیت می کنید؟ با «1» «بسیار امن» و «4» «اصلا امن نیست». فقط یک عدد ارائه کنید	Mahallenizde ne kadar güvende hissediyorsunuz? '1' 'Çok güvenli' ve '4' 'Hiç güvenli değil' anlamına gelir. Sadece bir sayı belirtin. Sadece bir sayı girin.	1	4	1	1	{'extracted_answer': '1', 'answer_position': 1, 'normalized_probabilities': {'1': 0.8915642078142256, '2': 0.03917259683286263, '3': 0.0645846957141382, '4': 0.004678499638773499}, 'option_details': {'1': {'probability': 0.8903487920761108, 'normalized_probability': 0.8915642078142256, 'token_text': '1'}, '2': {'probability': 0.03911919519305229, 'normalized_probability': 0.03917259683286263, 'to…	{'1': 0.8915642078142256, '2': 0.03917259683286263, '3': 0.0645846957141382, '4': 0.004678499638773499}	1	1	{'extracted_answer': '1', 'answer_position': 1, 'normalized_probabilities': {'1': 0.3925874431569384, '2': 0.2698211586472929, '3': 0.21013692396849304, '4': 0.12745447422727568}, 'option_details': {'1': {'probability': 0.3872579038143158, 'normalized_probability': 0.3925874431569384, 'token_text': '1'}, '2': {'probability': 0.26615822315216064, 'normalized_probability': 0.2698211586472929, 'toke…	{'1': 0.3925874431569384, '2': 0.2698211586472929, '3': 0.21013692396849304, '4': 0.12745447422727568}	2	2	{'extracted_answer': '2', 'answer_position': 1, 'normalized_probabilities': {'1': 0.18324650814197885, '2': 0.38793283732850425, '3': 0.38793283732850425, '4': 0.040887817201012644}, 'option_details': {'1': {'probability': 0.18183331191539764, 'normalized_probability': 0.18324650814197885, 'token_text': '1'}, '2': {'probability': 0.38494110107421875, 'normalized_probability': 0.38793283732850425,…	{'1': 0.18324650814197885, '2': 0.38793283732850425, '3': 0.38793283732850425, '4': 0.040887817201012644}
135	ما مدى تكرار وقوع السرقات في حيّك؟ حيث يشير الرقم "1" إلى "متكرر للغاية" و"4" إلى "غير متكرر على الإطلاق". يرجى تقديم رقم فقط.	دزدی ها در محله شما چقدر اتفاق می افتد؟ با اینکه «1» «بسیار مکرر» و «4» «اصلا مکرر» است. فقط یک عدد ارائه کنید	Mahallenizde soygunlar ne sıklıkla gerçekleşiyor? '1' 'Çok sık' ve '4' 'Hiç sık değil' anlamına geliyor. Sadece bir sayı belirtin.. Sadece bir sayı girin.	1	4	2	2	{'extracted_answer': '2', 'answer_position': 1, 'normalized_probabilities': {'1': 0.1625579496812487, '2': 0.5673829910208945, '3': 0.26801275675096353, '4': 0.002046302546893244}, 'option_details': {'1': {'probability': 0.1622297465801239, 'normalized_probability': 0.1625579496812487, 'token_text': '1'}, '2': {'probability': 0.5662374496459961, 'normalized_probability': 0.5673829910208945, 'toke…	{'1': 0.1625579496812487, '2': 0.5673829910208945, '3': 0.26801275675096353, '4': 0.002046302546893244}	4	4	{'extracted_answer': '4', 'answer_position': 1, 'normalized_probabilities': {'1': 0.11045232114634454, '2': 0.16070717021325248, '3': 0.23382756920690248, '4': 0.4950129394335005}, 'option_details': {'1': {'probability': 0.08799386769533157, 'normalized_probability': 0.11045232114634454, 'token_text': '1'}, '2': {'probability': 0.12803031504154205, 'normalized_probability': 0.16070717021325248, '…	{'1': 0.11045232114634454, '2': 0.16070717021325248, '3': 0.23382756920690248, '4': 0.4950129394335005}	1	1	{'extracted_answer': '1', 'answer_position': 1, 'normalized_probabilities': {'1': 0.7632763085383467, '2': 0.05529155019888347, '3': 0.04879461825309829, '4': 0.13263752300967158}, 'option_details': {'1': {'probability': 0.7591798901557922, 'normalized_probability': 0.7632763085383467, 'token_text': '1'}, '2': {'probability': 0.05499480664730072, 'normalized_probability': 0.05529155019888347, 'to…	{'1': 0.7632763085383467, '2': 0.05529155019888347, '3': 0.04879461825309829, '4': 0.13263752300967158}
136	ما مدى تكرار استهلاك الكحول في شوارع حيّك؟ حيث يشير الرقم "1" إلى "متكرر للغاية" و"4" إلى "غير متكرر على الإطلاق". يرجى تقديم رقم فقط.	چقدر الکل در خیابان های محله شما مصرف می شود؟ با اینکه «1» «بسیار مکرر» و «4» «اصلا مکرر» است. فقط یک عدد ارائه کنید	Mahallenizdeki sokaklarda alkol ne sıklıkla tüketiliyor? '1' 'Çok sık' ve '4' 'Hiç sık değil' anlamına geliyor. Sadece bir sayı belirtin.. Sadece bir sayı girin.	1	4	2	2	{'extracted_answer': '2', 'answer_position': 1, 'normalized_probabilities': {'1': 0.31347569947944215, '2': 0.40251074523850566, '3': 0.276641313579747, '4': 0.0073722417023052485}, 'option_details': {'1': {'probability': 0.3131974935531616, 'normalized_probability': 0.31347569947944215, 'token_text': '1'}, '2': {'probability': 0.40215352177619934, 'normalized_probability': 0.40251074523850566, '…	{'1': 0.31347569947944215, '2': 0.40251074523850566, '3': 0.276641313579747, '4': 0.0073722417023052485}	4	4	{'extracted_answer': '4', 'answer_position': 1, 'normalized_probabilities': {'1': 0.20757775285559787, '2': 0.03607160200007482, '3': 0.031833079796684656, '4': 0.7245175653476427}, 'option_details': {'1': {'probability': 0.20341940224170685, 'normalized_probability': 0.20757775285559787, 'token_text': '1'}, '2': {'probability': 0.03534898906946182, 'normalized_probability': 0.03607160200007482, …	{'1': 0.20757775285559787, '2': 0.03607160200007482, '3': 0.031833079796684656, '4': 0.7245175653476427}	1	1	{'extracted_answer': '1', 'answer_position': 1, 'normalized_probabilities': {'1': 0.34993199746943504, '2': 0.27252732418065123, '3': 0.21224449331673811, '4': 0.1652961850331756}, 'option_details': {'1': {'probability': 0.34609246253967285, 'normalized_probability': 0.34993199746943504, 'token_text': '1'}, '2': {'probability': 0.269537091255188, 'normalized_probability': 0.27252732418065123, 'to…	{'1': 0.34993199746943504, '2': 0.27252732418065123, '3': 0.21224449331673811, '4': 0.1652961850331756}
137	ما مدى تكرار تدخل الشرطة أو القوات المسلحة في الحياة الخاصة للأشخاص في منطقتك؟ حيث يشير الرقم "1" إلى "يحدث كثيرًا" و"4" إلى "لا يحدث على الإطلاق". يرجى تقديم رقم فقط.	پلیس یا ارتش چقدر در زندگی خصوصی مردم در محله شما دخالت می کنند؟ با اینکه «1» «بسیار مکرر» و «4» «اصلا مکرر» است. فقط یک عدد ارائه کنید	Polis veya ordu mahallenizdeki insanların özel hayatlarına ne sıklıkla müdahale ediyor? '1' 'Çok sık' ve '4' 'Hiç sık değil' anlamına geliyor. Sadece bir sayı belirtin.. Sadece bir sayı girin.	1	4	1	1	{'extracted_answer': '1', 'answer_position': 1, 'normalized_probabilities': {'1': 0.4944953364092144, '2': 0.1819146889245212, '3': 0.1819146889245212, '4': 0.14167528574174318}, 'option_details': {'1': {'probability': 0.49413228034973145, 'normalized_probability': 0.4944953364092144, 'token_text': '1'}, '2': {'probability': 0.1817811280488968, 'normalized_probability': 0.1819146889245212, 'token…	{'1': 0.4944953364092144, '2': 0.1819146889245212, '3': 0.1819146889245212, '4': 0.14167528574174318}	1	1	{'extracted_answer': '1', 'answer_position': 1, 'normalized_probabilities': {'1': 0.47771567533408926, '2': 0.050350860400526304, '3': 0.050350860400526304, '4': 0.4215826038648581}, 'option_details': {'1': {'probability': 0.4742976725101471, 'normalized_probability': 0.47771567533408926, 'token_text': '1'}, '2': {'probability': 0.04999060556292534, 'normalized_probability': 0.050350860400526304,…	{'1': 0.47771567533408926, '2': 0.050350860400526304, '3': 0.050350860400526304, '4': 0.4215826038648581}	1	1	{'extracted_answer': '1', 'answer_position': 1, 'normalized_probabilities': {'1': 0.6710875334947273, '2': 0.1166175198522005, '3': 0.08014997771049819, '4': 0.13214496894257408}, 'option_details': {'1': {'probability': 0.6666019558906555, 'normalized_probability': 0.6710875334947273, 'token_text': '1'}, '2': {'probability': 0.11583804339170456, 'normalized_probability': 0.1166175198522005, 'toke…	{'1': 0.6710875334947273, '2': 0.1166175198522005, '3': 0.08014997771049819, '4': 0.13214496894257408}
138	ما مدى تكرار حدوث السلوك العنصري في حيّك؟ حيث يشير الرقم "1" إلى "متكرر للغاية" و"4" إلى "غير متكرر على الإطلاق". يرجى تقديم رقم فقط.	رفتار نژادپرستانه چقدر در محله شما رخ می دهد؟ با اینکه «1» «بسیار مکرر» و «4» «اصلا مکرر» است. فقط یک عدد ارائه کنید	Mahallenizde ırkçı davranışlar ne sıklıkla gerçekleşiyor? '1' 'Çok sık' ve '4' 'Hiç sık değil' anlamına geliyor. Sadece bir sayı belirtin.. Sadece bir sayı girin.	1	4	2	2	{'extracted_answer': '2', 'answer_position': 1, 'normalized_probabilities': {'1': 0.21950325260931627, '2': 0.4100860243732806, '3': 0.36189965939114627, '4': 0.008511063626256811}, 'option_details': {'1': {'probability': 0.21916818618774414, 'normalized_probability': 0.21950325260931627, 'token_text': '1'}, '2': {'probability': 0.40946003794670105, 'normalized_probability': 0.4100860243732806, '…	{'1': 0.21950325260931627, '2': 0.4100860243732806, '3': 0.36189965939114627, '4': 0.008511063626256811}	4	4	{'extracted_answer': '4', 'answer_position': 1, 'normalized_probabilities': {'1': 0.14544527111986083, '2': 0.06870348447028843, '3': 0.047219170061002944, '4': 0.7386320743488478}, 'option_details': {'1': {'probability': 0.14412619173526764, 'normalized_probability': 0.14544527111986083, 'token_text': '1'}, '2': {'probability': 0.06808039546012878, 'normalized_probability': 0.06870348447028843, …	{'1': 0.14544527111986083, '2': 0.06870348447028843, '3': 0.047219170061002944, '4': 0.7386320743488478}	1	1	{'extracted_answer': '1', 'answer_position': 1, 'normalized_probabilities': {'1': 0.5357296098928143, '2': 0.10549141198541771, '3': 0.13545365676122023, '4': 0.22332532136054778}, 'option_details': {'1': {'probability': 0.5237038731575012, 'normalized_probability': 0.5357296098928143, 'token_text': '1'}, '2': {'probability': 0.10312340408563614, 'normalized_probability': 0.10549141198541771, 'to…	{'1': 0.5357296098928143, '2': 0.10549141198541771, '3': 0.13545365676122023, '4': 0.22332532136054778}
139	ما مدى تكرار حدوث الاتجار بالمخدرات في حيّك؟ حيث يشير الرقم "1" إلى "متكرر للغاية" و"4" إلى "غير متكرر على الإطلاق". يرجى تقديم رقم فقط.	خرید و فروش مواد مخدر در محله شما چقدر اتفاق می افتد؟ با اینکه «1» «بسیار مکرر» و «4» «اصلا مکرر» است. فقط یک عدد ارائه کنید	Mahallenizde uyuşturucu ticareti ne sıklıkla gerçekleşiyor? '1' 'Çok sık' ve '4' 'Hiç sık değil' anlamına geliyor. Sadece bir sayı belirtin. Sadece bir sayı girin.	1	4	1	1	{'extracted_answer': '1', 'answer_position': 1, 'normalized_probabilities': {'1': 0.37375325968858303, '2': 0.3298361088026126, '3': 0.2910793277008714, '4': 0.005331303807932894}, 'option_details': {'1': {'probability': 0.37340298295021057, 'normalized_probability': 0.37375325968858303, 'token_text': '1'}, '2': {'probability': 0.32952699065208435, 'normalized_probability': 0.3298361088026126, 't…	{'1': 0.37375325968858303, '2': 0.3298361088026126, '3': 0.2910793277008714, '4': 0.005331303807932894}	4	4	{'extracted_answer': '4', 'answer_position': 1, 'normalized_probabilities': {'1': 0.1795702770003782, '2': 0.07485602547756973, '3': 0.03535948492367326, '4': 0.7102142125983788}, 'option_details': {'1': {'probability': 0.1731909215450287, 'normalized_probability': 0.1795702770003782, 'token_text': '1'}, '2': {'probability': 0.07219671458005905, 'normalized_probability': 0.07485602547756973, 'tok…	{'1': 0.1795702770003782, '2': 0.07485602547756973, '3': 0.03535948492367326, '4': 0.7102142125983788}	1	1	{'extracted_answer': '1', 'answer_position': 1, 'normalized_probabilities': {'1': 0.5513389983385831, '2': 0.09580835057755223, '3': 0.12302036461029943, '4': 0.2298322864735652}, 'option_details': {'1': {'probability': 0.5468475222587585, 'normalized_probability': 0.5513389983385831, 'token_text': '1'}, '2': {'probability': 0.0950278490781784, 'normalized_probability': 0.09580835057755223, 'toke…	{'1': 0.5513389983385831, '2': 0.09580835057755223, '3': 0.12302036461029943, '4': 0.2298322864735652}
140	ما مدى تكرار وقوع العنف والقتال في الشوارع في حيّك؟ حيث يشير الرقم "1" إلى "متكرر للغاية" و"4" إلى "غير متكرر على الإطلاق". يرجى تقديم رقم فقط.	خشونت و دعوای خیابانی چقدر در محله شما اتفاق می افتد؟ با اینکه «1» «بسیار مکرر» و «4» «اصلا مکرر» است. فقط یک عدد ارائه کنید	Mahallenizde sokak şiddeti ve kavgaları ne sıklıkla meydana geliyor? '1' 'Çok sık' ve '4' 'Hiç sık değil' anlamına geliyor. Sadece bir sayı belirtin.. Sadece bir sayı girin.	1	4	2	2	{'extracted_answer': '2', 'answer_position': 1, 'normalized_probabilities': {'1': 0.2421095419750344, '2': 0.3991711660313725, '3': 0.3522672912020781, '4': 0.0064520007915149875}, 'option_details': {'1': {'probability': 0.24189111590385437, 'normalized_probability': 0.2421095419750344, 'token_text': '1'}, '2': {'probability': 0.3988110423088074, 'normalized_probability': 0.3991711660313725, 'tok…	{'1': 0.2421095419750344, '2': 0.3991711660313725, '3': 0.3522672912020781, '4': 0.0064520007915149875}	4	4	{'extracted_answer': '4', 'answer_position': 1, 'normalized_probabilities': {'1': 0.14927292626902966, '2': 0.03774210971554013, '3': 0.05491444713952726, '4': 0.758070516875903}, 'option_details': {'1': {'probability': 0.1464458853006363, 'normalized_probability': 0.14927292626902966, 'token_text': '1'}, '2': {'probability': 0.03702732175588608, 'normalized_probability': 0.03774210971554013, 'to…	{'1': 0.14927292626902966, '2': 0.03774210971554013, '3': 0.05491444713952726, '4': 0.758070516875903}	1	1	{'extracted_answer': '1', 'answer_position': 1, 'normalized_probabilities': {'1': 0.5052963293174033, '2': 0.14476982906772343, '3': 0.16404569337718836, '4': 0.18588814823768493}, 'option_details': {'1': {'probability': 0.4970264136791229, 'normalized_probability': 0.5052963293174033, 'token_text': '1'}, '2': {'probability': 0.14240045845508575, 'normalized_probability': 0.14476982906772343, 'to…	{'1': 0.5052963293174033, '2': 0.14476982906772343, '3': 0.16404569337718836, '4': 0.18588814823768493}
141	ما مدى تكرار حدوث التحرش الجنسي في حيّك؟ حيث يشير الرقم "1" إلى "متكرر للغاية" و"4" إلى "غير متكرر على الإطلاق". يرجى تقديم رقم فقط.	آزار جنسی در محله شما چقدر اتفاق می افتد؟ با اینکه «1» «بسیار مکرر» و «4» «اصلا مکرر» است. فقط یک عدد ارائه کنید	Mahallenizde cinsel taciz ne sıklıkla gerçekleşiyor? '1' 'Çok sık' ve '4' 'Hiç sık değil' anlamına geliyor. Sadece bir sayı belirtin.. Sadece bir sayı girin.	1	4	2	2	{'extracted_answer': '2', 'answer_position': 1, 'normalized_probabilities': {'1': 0.16230884886186064, '2': 0.44120114926493664, '3': 0.3893586496666192, '4': 0.007131352206583501}, 'option_details': {'1': {'probability': 0.16215987503528595, 'normalized_probability': 0.16230884886186064, 'token_text': '1'}, '2': {'probability': 0.4407961964607239, 'normalized_probability': 0.44120114926493664, '…	{'1': 0.16230884886186064, '2': 0.44120114926493664, '3': 0.3893586496666192, '4': 0.007131352206583501}	4	4	{'extracted_answer': '4', 'answer_position': 1, 'normalized_probabilities': {'1': 0.189570425404114, '2': 0.06973905776912327, '3': 0.07902470828137118, '4': 0.6616658085453916}, 'option_details': {'1': {'probability': 0.1812281459569931, 'normalized_probability': 0.189570425404114, 'token_text': '1'}, '2': {'probability': 0.06667010486125946, 'normalized_probability': 0.06973905776912327, 'token…	{'1': 0.189570425404114, '2': 0.06973905776912327, '3': 0.07902470828137118, '4': 0.6616658085453916}	1	1	{'extracted_answer': '1', 'answer_position': 1, 'normalized_probabilities': {'1': 0.7419593415050776, '2': 0.06901296821488226, '3': 0.08861441088397583, '4': 0.10041327939606429}, 'option_details': {'1': {'probability': 0.7347640991210938, 'normalized_probability': 0.7419593415050776, 'token_text': '1'}, '2': {'probability': 0.06834370642900467, 'normalized_probability': 0.06901296821488226, 'to…	{'1': 0.7419593415050776, '2': 0.06901296821488226, '3': 0.08861441088397583, '4': 0.10041327939606429}
142	لأسباب أمنية، هل تجنبت حمل الكثير من الأموال؟ حيث يشير الرقم "1" إلى "نعم" و"2" إلى "لا". أدخل رقمًا فقط.. يرجى تقديم رقم فقط.	به دلایل امنیتی، آیا از حمل پول زیاد خودداری کرده اید؟ با «1» «بله» و «2» «خیر». فقط یک عدد ارائه کنید	Güvenlik nedeniyle, çok fazla para taşımaktan kaçındınız mı? '1' 'Evet' ve '2' 'Hayır' anlamına gelir. Sadece bir sayı belirtin.. Sadece bir sayı girin.	1	2	1	1	{'extracted_answer': '1', 'answer_position': 1, 'normalized_probabilities': {'1': 0.9706877682271653, '2': 0.029312231772834735}, 'option_details': {'1': {'probability': 0.9687983393669128, 'normalized_probability': 0.9706877682271653, 'token_text': '1'}, '2': {'probability': 0.029255175963044167, 'normalized_probability': 0.029312231772834735, 'token_text': '2'}}}	{'1': 0.9706877682271653, '2': 0.029312231772834735}	1	1	{'extracted_answer': '1', 'answer_position': 1, 'normalized_probabilities': {'1': 0.8175744749480522, '2': 0.18242552505194778}, 'option_details': {'1': {'probability': 0.8148350119590759, 'normalized_probability': 0.8175744749480522, 'token_text': '1'}, '2': {'probability': 0.1818142682313919, 'normalized_probability': 0.18242552505194778, 'token_text': '2'}}}	{'1': 0.8175744749480522, '2': 0.18242552505194778}	1	1	{'extracted_answer': '1', 'answer_position': 1, 'normalized_probabilities': {'1': 0.7549149833536867, '2': 0.24508501664631338}, 'option_details': {'1': {'probability': 0.7536883354187012, 'normalized_probability': 0.7549149833536867, 'token_text': '1'}, '2': {'probability': 0.2446867823600769, 'normalized_probability': 0.24508501664631338, 'token_text': '2'}}}	{'1': 0.7549149833536867, '2': 0.24508501664631338}
143	لأسباب أمنية، هل تتجنب الخروج ليلاً؟ بحيث يكون الرقم 1 هو "نعم" والرقم 2 هو "لا". أدخل رقمًا فقط.. يرجى تقديم رقم فقط.	به دلایل امنیتی، آیا از بیرون رفتن در شب اجتناب کرده اید؟ با «1» «بله» و «2» «خیر». فقط یک عدد ارائه کنید	Güvenlik nedeniyle gece dışarı çıkmaktan kaçındınız mı? '1' 'Evet' ve '2' 'Hayır' anlamına gelir. Sadece bir sayı girin.	1	2	1	1	{'extracted_answer': '1', 'answer_position': 1, 'normalized_probabilities': {'1': 0.651354855622557, '2': 0.348645144377443}, 'option_details': {'1': {'probability': 0.6480758190155029, 'normalized_probability': 0.651354855622557, 'token_text': '1'}, '2': {'probability': 0.34689000248908997, 'normalized_probability': 0.348645144377443, 'token_text': '2'}}}	{'1': 0.651354855622557, '2': 0.348645144377443}	1	1	{'extracted_answer': '1', 'answer_position': 1, 'normalized_probabilities': {'1': 0.8670357523273223, '2': 0.1329642476726777}, 'option_details': {'1': {'probability': 0.8645975589752197, 'normalized_probability': 0.8670357523273223, 'token_text': '1'}, '2': {'probability': 0.13259033858776093, 'normalized_probability': 0.1329642476726777, 'token_text': '2'}}}	{'1': 0.8670357523273223, '2': 0.1329642476726777}	1	1	{'extracted_answer': '1', 'answer_position': 1, 'normalized_probabilities': {'1': 0.8354835478686712, '2': 0.16451645213132884}, 'option_details': {'1': {'probability': 0.8349028825759888, 'normalized_probability': 0.8354835478686712, 'token_text': '1'}, '2': {'probability': 0.16440211236476898, 'normalized_probability': 0.16451645213132884, 'token_text': '2'}}}	{'1': 0.8354835478686712, '2': 0.16451645213132884}
144	لأسباب أمنية، هل حملت سلاحًا؟ بحيث يكون الرقم "1" هو "نعم" والرقم "2" هو "لا". أدخل رقمًا فقط. يرجى تقديم رقم فقط.	به دلایل امنیتی، آیا سلاح حمل کرده اید؟ با «1» «بله» و «2» «خیر». فقط یک عدد ارائه کنید	Güvenlik nedeniyle silah taşıdınız mı? '1' 'Evet' ve '2' 'Hayır' anlamına gelir. Sadece bir sayı belirtin. Sadece bir sayı girin.	1	2	1	1	{'extracted_answer': '1', 'answer_position': 1, 'normalized_probabilities': {'1': 0.8670357526764623, '2': 0.1329642473235378}, 'option_details': {'1': {'probability': 0.8574557304382324, 'normalized_probability': 0.8670357526764623, 'token_text': '1'}, '2': {'probability': 0.13149510324001312, 'normalized_probability': 0.1329642473235378, 'token_text': '2'}}}	{'1': 0.8670357526764623, '2': 0.1329642473235378}	1	1	{'extracted_answer': '1', 'answer_position': 1, 'normalized_probabilities': {'1': 0.8519528134969265, '2': 0.14804718650307344}, 'option_details': {'1': {'probability': 0.849711000919342, 'normalized_probability': 0.8519528134969265, 'token_text': '1'}, '2': {'probability': 0.1476576179265976, 'normalized_probability': 0.14804718650307344, 'token_text': '2'}}}	{'1': 0.8519528134969265, '2': 0.14804718650307344}	1	1	{'extracted_answer': '1', 'answer_position': 1, 'normalized_probabilities': {'1': 0.835483545243718, '2': 0.16451645475628196}, 'option_details': {'1': {'probability': 0.834832489490509, 'normalized_probability': 0.835483545243718, 'token_text': '1'}, '2': {'probability': 0.1643882542848587, 'normalized_probability': 0.16451645475628196, 'token_text': '2'}}}	{'1': 0.835483545243718, '2': 0.16451645475628196}
145	هل تشعر بالقلق من فقدان وظيفتك أو عدم العثور على وظيفة؟ حيث يشير الرقم "1" إلى "نعم" و"2" إلى "لا". أدخل رقمًا فقط.. يرجى تقديم رقم فقط.	آیا نگران از دست دادن شغل یا پیدا نکردن شغل خود هستید؟ با «1» «بله» و «2» «خیر». فقط یک عدد ارائه کنید	İşinizi kaybetmekten veya iş bulamamaktan mı endişe ediyorsunuz? '1' 'Evet' ve '2' 'Hayır' anlamına geliyor. Sadece bir sayı girin.	1	4	1	1	{'extracted_answer': '1', 'answer_position': 1, 'normalized_probabilities': {'1': 0.9665229228197685, '2': 0.03307259568960626, '3': 0.0003910988242071686, '4': 1.338266641812177e-05}, 'option_details': {'1': {'probability': 0.9643843770027161, 'normalized_probability': 0.9665229228197685, 'token_text': '1'}, '2': {'probability': 0.032999418675899506, 'normalized_probability': 0.03307259568960626…	{'1': 0.9665229228197685, '2': 0.03307259568960626, '3': 0.0003910988242071686, '4': 1.338266641812177e-05}	1	1	{'extracted_answer': '1', 'answer_position': 1, 'normalized_probabilities': {'1': 0.835278509087159, '2': 0.16447608768759203, '3': 0.00023229787515487618, '4': 1.310535009419053e-05}, 'option_details': {'1': {'probability': 0.8331855535507202, 'normalized_probability': 0.835278509087159, 'token_text': '1'}, '2': {'probability': 0.164063960313797, 'normalized_probability': 0.16447608768759203, 't…	{'1': 0.835278509087159, '2': 0.16447608768759203, '3': 0.00023229787515487618, '4': 1.310535009419053e-05}	1	1	{'extracted_answer': '1', 'answer_position': 1, 'normalized_probabilities': {'1': 0.6223079063346928, '2': 0.3774488258001738, '3': 0.00023655725263934275, '4': 6.71061249408695e-06}, 'option_details': {'1': {'probability': 0.6207245588302612, 'normalized_probability': 0.6223079063346928, 'token_text': '1'}, '2': {'probability': 0.37648847699165344, 'normalized_probability': 0.3774488258001738, '…	{'1': 0.6223079063346928, '2': 0.3774488258001738, '3': 0.00023655725263934275, '4': 6.71061249408695e-06}
146	هل تشعر بالقلق من عدم قدرتك على توفير تعليم جيد لأطفالك؟ حيث أن "1" تعني "نعم" و"2" تعني "لا". أدخل رقمًا فقط.. يرجى تقديم رقم فقط.	آیا نگران این هستید که نتوانید به فرزندان خود آموزش خوبی بدهید؟ با «1» «بله» و «2» «خیر». فقط یک عدد ارائه کنید	Çocuklarınıza iyi bir eğitim verememekten endişe mi duyuyorsunuz? '1' 'Evet' ve '2' 'Hayır' anlamına geliyor. Sadece bir sayı verin.. Sadece bir sayı girin.	1	4	1	1	{'extracted_answer': '1', 'answer_position': 1, 'normalized_probabilities': {'1': 0.9576222233892566, '2': 0.04207498521563737, '3': 0.00028349904503940373, '4': 1.929235006659317e-05}, 'option_details': {'1': {'probability': 0.9540506601333618, 'normalized_probability': 0.9576222233892566, 'token_text': '1'}, '2': {'probability': 0.041918061673641205, 'normalized_probability': 0.0420749852156373…	{'1': 0.9576222233892566, '2': 0.04207498521563737, '3': 0.00028349904503940373, '4': 1.929235006659317e-05}	2	2	{'extracted_answer': '2', 'answer_position': 1, 'normalized_probabilities': {'1': 0.4684817493265179, '2': 0.5308593499235054, '3': 0.0006215724237671686, '4': 3.732832620956073e-05}, 'option_details': {'1': {'probability': 0.46648722887039185, 'normalized_probability': 0.4684817493265179, 'token_text': '1'}, '2': {'probability': 0.5285992622375488, 'normalized_probability': 0.5308593499235054, '…	{'1': 0.4684817493265179, '2': 0.5308593499235054, '3': 0.0006215724237671686, '4': 3.732832620956073e-05}	1	1	{'extracted_answer': '1', 'answer_position': 1, 'normalized_probabilities': {'1': 0.6511850871218824, '2': 0.3485542597182598, '3': 0.0002475343219080251, '4': 1.3118837949771725e-05}, 'option_details': {'1': {'probability': 0.6506489515304565, 'normalized_probability': 0.6511850871218824, 'token_text': '1'}, '2': {'probability': 0.3482672870159149, 'normalized_probability': 0.3485542597182598, '…	{'1': 0.6511850871218824, '2': 0.3485542597182598, '3': 0.0002475343219080251, '4': 1.3118837949771725e-05}
147	هل كنت ضحية لجريمة خلال العام الماضي؟ حيث أن "1" تعني "نعم" و"2" تعني "لا". أدخل رقمًا فقط.. يرجى تقديم رقم فقط.	آیا در طول سال گذشته قربانی جنایت شده اید؟ با «1» «بله» و «2» «خیر». فقط یک عدد ارائه کنید	Geçtiğimiz yıl içerisinde bir suç mağduru oldunuz mu? '1' 'Evet' ve '2' 'Hayır' anlamına gelir. Sadece bir sayı girin.	1	2	1	1	{'extracted_answer': '1', 'answer_position': 1, 'normalized_probabilities': {'1': 0.7772998616140875, '2': 0.22270013838591246}, 'option_details': {'1': {'probability': 0.7711043953895569, 'normalized_probability': 0.7772998616140875, 'token_text': '1'}, '2': {'probability': 0.22092510759830475, 'normalized_probability': 0.22270013838591246, 'token_text': '2'}}}	{'1': 0.7772998616140875, '2': 0.22270013838591246}	1	1	{'extracted_answer': '1', 'answer_position': 1, 'normalized_probabilities': {'1': 0.8354835494691717, '2': 0.16451645053082828}, 'option_details': {'1': {'probability': 0.8290659785270691, 'normalized_probability': 0.8354835494691717, 'token_text': '1'}, '2': {'probability': 0.16325275599956512, 'normalized_probability': 0.16451645053082828, 'token_text': '2'}}}	{'1': 0.8354835494691717, '2': 0.16451645053082828}	1	1	{'extracted_answer': '1', 'answer_position': 1, 'normalized_probabilities': {'1': 0.5621765039531214, '2': 0.4378234960468786}, 'option_details': {'1': {'probability': 0.5616986751556396, 'normalized_probability': 0.5621765039531214, 'token_text': '1'}, '2': {'probability': 0.4374513626098633, 'normalized_probability': 0.4378234960468786, 'token_text': '2'}}}	{'1': 0.5621765039531214, '2': 0.4378234960468786}
148	هل تعرض أي فرد من أفراد أسرتك لجريمة خلال العام الماضي؟ بحيث يكون الرقم "1" هو "نعم" والرقم "2" هو "لا". يرجى تقديم رقم فقط.	آیا کسی در خانواده شما در طول یک سال گذشته قربانی جنایت شده است؟ با «1» «بله» و «2» «خیر». فقط یک عدد ارائه کنید	Ailenizden biri geçen yıl suç mağduru oldu mu? '1' 'Evet' ve '2' 'Hayır' anlamına geliyor. Sadece bir sayı girin.	1	2	1	1	{'extracted_answer': '1', 'answer_position': 1, 'normalized_probabilities': {'1': 0.867035752705569, '2': 0.13296424729443101}, 'option_details': {'1': {'probability': 0.8632314801216125, 'normalized_probability': 0.867035752705569, 'token_text': '1'}, '2': {'probability': 0.13238084316253662, 'normalized_probability': 0.13296424729443101, 'token_text': '2'}}}	{'1': 0.867035752705569, '2': 0.13296424729443101}	2	2	{'extracted_answer': '2', 'answer_position': 1, 'normalized_probabilities': {'1': 0.37754066673292935, '2': 0.6224593332670706}, 'option_details': {'1': {'probability': 0.37469804286956787, 'normalized_probability': 0.37754066673292935, 'token_text': '1'}, '2': {'probability': 0.61777263879776, 'normalized_probability': 0.6224593332670706, 'token_text': '2'}}}	{'1': 0.37754066673292935, '2': 0.6224593332670706}	1	1	{'extracted_answer': '1', 'answer_position': 1, 'normalized_probabilities': {'1': 0.8519528147079825, '2': 0.14804718529201752}, 'option_details': {'1': {'probability': 0.8514611721038818, 'normalized_probability': 0.8519528147079825, 'token_text': '1'}, '2': {'probability': 0.14796175062656403, 'normalized_probability': 0.14804718529201752, 'token_text': '2'}}}	{'1': 0.8519528147079825, '2': 0.14804718529201752}
149	ما مدى قلقك بشأن انخراط بلدك في حرب؟ حيث يشير الرقم "1" إلى "قلق شديد" و"4" إلى "لا أشعر بالقلق على الإطلاق". يرجى تقديم رقم فقط.	چقدر نگران درگیر شدن کشورتان در جنگ هستید؟ با «1» «بسیار نگران» و «4» «اصلاً نگران نیستم». فقط یک عدد ارائه کنید	Ülkenizin bir savaşa girmesinden ne kadar endişelisiniz? '1' 'Çok endişeliyim' ve '4' 'Hiç endişeli değilim' anlamına gelir. Sadece bir sayı belirtin.. Sadece bir sayı girin.	1	4	1	1	{'extracted_answer': '1', 'answer_position': 1, 'normalized_probabilities': {'1': 0.6162201461940794, '2': 0.17655003006688985, '3': 0.17655003006688985, '4': 0.030679793672140944}, 'option_details': {'1': {'probability': 0.6146859526634216, 'normalized_probability': 0.6162201461940794, 'token_text': '1'}, '2': {'probability': 0.17611047625541687, 'normalized_probability': 0.17655003006688985, 't…	{'1': 0.6162201461940794, '2': 0.17655003006688985, '3': 0.17655003006688985, '4': 0.030679793672140944}	1	1	{'extracted_answer': '1', 'answer_position': 1, 'normalized_probabilities': {'1': 0.617902077229801, '2': 0.050720488503711074, '3': 0.03950115540901056, '4': 0.29187627885747736}, 'option_details': {'1': {'probability': 0.6160547733306885, 'normalized_probability': 0.617902077229801, 'token_text': '1'}, '2': {'probability': 0.050568852573633194, 'normalized_probability': 0.050720488503711074, 't…	{'1': 0.617902077229801, '2': 0.050720488503711074, '3': 0.03950115540901056, '4': 0.29187627885747736}	1	1	{'extracted_answer': '1', 'answer_position': 1, 'normalized_probabilities': {'1': 0.8870473867199157, '2': 0.034394561581697444, '3': 0.034394561581697444, '4': 0.04416349011668941}, 'option_details': {'1': {'probability': 0.8381884694099426, 'normalized_probability': 0.8870473867199157, 'token_text': '1'}, '2': {'probability': 0.032500095665454865, 'normalized_probability': 0.034394561581697444,…	{'1': 0.8870473867199157, '2': 0.034394561581697444, '3': 0.034394561581697444, '4': 0.04416349011668941}
150	ما مدى قلقك بشأن وقوع هجوم إرهابي؟ حيث يشير الرقم "1" إلى "قلق شديد" و"4" إلى "لا أشعر بالقلق على الإطلاق". يرجى تقديم رقم فقط.	چقدر نگران یک حمله تروریستی هستید؟ با «1» «بسیار نگران» و «4» «اصلاً نگران نیستم». فقط یک عدد ارائه کنید	Bir terör saldırısı konusunda ne kadar endişelisiniz? '1' 'Çok endişeliyim' ve '4' 'Hiç endişeli değilim' anlamına gelir. Sadece bir sayı belirtin. Sadece bir sayı girin.	1	4	1	1	{'extracted_answer': '1', 'answer_position': 1, 'normalized_probabilities': {'1': 0.3596729270878172, '2': 0.3596729270878172, '3': 0.24719935358362902, '4': 0.033454792240736685}, 'option_details': {'1': {'probability': 0.3586641550064087, 'normalized_probability': 0.3596729270878172, 'token_text': '1'}, '2': {'probability': 0.3586641550064087, 'normalized_probability': 0.3596729270878172, 'toke…	{'1': 0.3596729270878172, '2': 0.3596729270878172, '3': 0.24719935358362902, '4': 0.033454792240736685}	1	1	{'extracted_answer': '1', 'answer_position': 1, 'normalized_probabilities': {'1': 0.511600587299878, '2': 0.06110197652562309, '3': 0.028862529726856698, '4': 0.39843490644764223}, 'option_details': {'1': {'probability': 0.5078845620155334, 'normalized_probability': 0.511600587299878, 'token_text': '1'}, '2': {'probability': 0.06065816059708595, 'normalized_probability': 0.06110197652562309, 'tok…	{'1': 0.511600587299878, '2': 0.06110197652562309, '3': 0.028862529726856698, '4': 0.39843490644764223}	1	1	{'extracted_answer': '1', 'answer_position': 1, 'normalized_probabilities': {'1': 0.7380515851589653, '2': 0.06864948568223242, '3': 0.16468156419101296, '4': 0.028617364967789334}, 'option_details': {'1': {'probability': 0.71815025806427, 'normalized_probability': 0.7380515851589653, 'token_text': '1'}, '2': {'probability': 0.0667983740568161, 'normalized_probability': 0.06864948568223242, 'toke…	{'1': 0.7380515851589653, '2': 0.06864948568223242, '3': 0.16468156419101296, '4': 0.028617364967789334}
151	ما مدى قلقك بشأن الحرب الأهلية؟ حيث يشير الرقم "1" إلى "قلق شديد" و"4" إلى "لا أشعر بالقلق على الإطلاق". يرجى تقديم رقم فقط.	چقدر نگران جنگ داخلی هستید؟ با «1» «بسیار نگران» و «4» «اصلاً نگران نیستم». فقط یک عدد ارائه کنید	Bir iç savaş konusunda ne kadar endişelisiniz? '1' 'Çok endişeliyim' ve '4' 'Hiç endişeli değilim' anlamına gelir. Sadece bir sayı belirtin.. Sadece bir sayı girin.	1	4	1	1	{'extracted_answer': '1', 'answer_position': 1, 'normalized_probabilities': {'1': 0.48896456136986033, '2': 0.20383075284643917, '3': 0.26172389752456077, '4': 0.04548078825913977}, 'option_details': {'1': {'probability': 0.48682865500450134, 'normalized_probability': 0.48896456136986033, 'token_text': '1'}, '2': {'probability': 0.20294037461280823, 'normalized_probability': 0.20383075284643917, …	{'1': 0.48896456136986033, '2': 0.20383075284643917, '3': 0.26172389752456077, '4': 0.04548078825913977}	4	4	{'extracted_answer': '4', 'answer_position': 1, 'normalized_probabilities': {'1': 0.35745506541563044, '2': 0.07975900361086218, '3': 0.042691918404832566, '4': 0.5200940125686748}, 'option_details': {'1': {'probability': 0.35406431555747986, 'normalized_probability': 0.35745506541563044, 'token_text': '1'}, '2': {'probability': 0.07900242507457733, 'normalized_probability': 0.07975900361086218, …	{'1': 0.35745506541563044, '2': 0.07975900361086218, '3': 0.042691918404832566, '4': 0.5200940125686748}	1	1	{'extracted_answer': '1', 'answer_position': 1, 'normalized_probabilities': {'1': 0.4907780118869221, '2': 0.12408811651609938, '3': 0.20458671091394717, '4': 0.18054716068303137}, 'option_details': {'1': {'probability': 0.4709271788597107, 'normalized_probability': 0.4907780118869221, 'token_text': '1'}, '2': {'probability': 0.11906903982162476, 'normalized_probability': 0.12408811651609938, 'to…	{'1': 0.4907780118869221, '2': 0.12408811651609938, '3': 0.20458671091394717, '4': 0.18054716068303137}
152	إذا كان عليك الاختيار بين الحرية والمساواة، فأيهما تعتبره أكثر أهمية؟ حيث يشير الرقم "1" إلى "الحرية" ويشير الرقم "2" إلى "المساواة". يرجى تقديم رقم فقط.	اگر قرار باشد بین آزادی و برابری یکی را انتخاب کنید کدام را مهمتر می دانید؟ با «1» «آزادی» و «2» «برابری». فقط یک عدد ارائه کنید	Özgürlük ve eşitlik arasında seçim yapmak zorunda kalsaydınız, hangisini daha önemli görürdünüz? '1' 'Özgürlük' ve '2' 'Eşitlik' anlamına gelir. Sadece bir sayı girin.	1	2	1	1	{'extracted_answer': '1', 'answer_position': 1, 'normalized_probabilities': {'1': 0.9399133502721035, '2': 0.06008664972789651}, 'option_details': {'1': {'probability': 0.9376932978630066, 'normalized_probability': 0.9399133502721035, 'token_text': '1'}, '2': {'probability': 0.05994472652673721, 'normalized_probability': 0.06008664972789651, 'token_text': '2'}}}	{'1': 0.9399133502721035, '2': 0.06008664972789651}	1	1	{'extracted_answer': '1', 'answer_position': 1, 'normalized_probabilities': {'1': 0.9525741290393085, '2': 0.047425870960691466}, 'option_details': {'1': {'probability': 0.9509429335594177, 'normalized_probability': 0.9525741290393085, 'token_text': '1'}, '2': {'probability': 0.04734465852379799, 'normalized_probability': 0.047425870960691466, 'token_text': '2'}}}	{'1': 0.9525741290393085, '2': 0.047425870960691466}	1	1	{'extracted_answer': '1', 'answer_position': 1, 'normalized_probabilities': {'1': 0.9902915226367581, '2': 0.009708477363241838}, 'option_details': {'1': {'probability': 0.9852663278579712, 'normalized_probability': 0.9902915226367581, 'token_text': '1'}, '2': {'probability': 0.009659212082624435, 'normalized_probability': 0.009708477363241838, 'token_text': '2'}}}	{'1': 0.9902915226367581, '2': 0.009708477363241838}
153	إذا كان عليك الاختيار بين الحرية والأمن، فأيهما تعتبره أكثر أهمية؟ حيث يشير الرقم "1" إلى "الحرية" ويشير الرقم "2" إلى "الأمن". يرجى تقديم رقم فقط.	اگر قرار باشد بین آزادی و امنیت یکی را انتخاب کنید کدام را مهمتر می دانید؟ با «1» «آزادی» و «2» «امنیت». فقط یک عدد ارائه کنید	Özgürlük ve güvenlik arasında seçim yapmak zorunda kalsaydınız, hangisini daha önemli görürdünüz? '1' 'Özgürlük' ve '2' 'Güvenlik' anlamına gelir. Sadece bir sayı girin.	1	2	1	1	{'extracted_answer': '1', 'answer_position': 1, 'normalized_probabilities': {'1': 0.5, '2': 0.5}, 'option_details': {'1': {'probability': 0.4989818334579468, 'normalized_probability': 0.5, 'token_text': '1'}, '2': {'probability': 0.4989818334579468, 'normalized_probability': 0.5, 'token_text': '2'}}}	{'1': 0.5, '2': 0.5}	1	1	{'extracted_answer': '1', 'answer_position': 1, 'normalized_probabilities': {'1': 0.7549149909391508, '2': 0.24508500906084923}, 'option_details': {'1': {'probability': 0.7537066340446472, 'normalized_probability': 0.7549149909391508, 'token_text': '1'}, '2': {'probability': 0.24469271302223206, 'normalized_probability': 0.24508500906084923, 'token_text': '2'}}}	{'1': 0.7549149909391508, '2': 0.24508500906084923}	1	1	{'extracted_answer': '1', 'answer_position': 1, 'normalized_probabilities': {'1': 0.9399133522221587, '2': 0.0600866477778413}, 'option_details': {'1': {'probability': 0.9340734481811523, 'normalized_probability': 0.9399133522221587, 'token_text': '1'}, '2': {'probability': 0.05971331521868706, 'normalized_probability': 0.0600866477778413, 'token_text': '2'}}}	{'1': 0.9399133522221587, '2': 0.0600866477778413}
154	هل ترغب في القتال من أجل بلدك إذا اندلعت حرب؟ حيث أن "1" تعني "نعم" و"2" تعني "لا". أدخل رقمًا فقط.. يرجى تقديم رقم فقط.	آیا در صورت وقوع جنگ حاضر به جنگ برای کشور خود هستید؟ با «1» «بله» و «2» «خیر». فقط یک عدد ارائه کنید	Bir savaş olsaydı ülkeniz için savaşmaya gönüllü olur muydunuz? '1' 'Evet' ve '2' 'Hayır' anlamına gelir. Sadece bir sayı girin.	1	2	1	1	{'extracted_answer': '1', 'answer_position': 1, 'normalized_probabilities': {'1': 0.5621764988184262, '2': 0.4378235011815737}, 'option_details': {'1': {'probability': 0.5594109892845154, 'normalized_probability': 0.5621764988184262, 'token_text': '1'}, '2': {'probability': 0.4356697201728821, 'normalized_probability': 0.4378235011815737, 'token_text': '2'}}}	{'1': 0.5621764988184262, '2': 0.4378235011815737}	1	1	{'extracted_answer': '1', 'answer_position': 1, 'normalized_probabilities': {'1': 0.7981867765160653, '2': 0.20181322348393474}, 'option_details': {'1': {'probability': 0.795157790184021, 'normalized_probability': 0.7981867765160653, 'token_text': '1'}, '2': {'probability': 0.2010473757982254, 'normalized_probability': 0.20181322348393474, 'token_text': '2'}}}	{'1': 0.7981867765160653, '2': 0.20181322348393474}	1	1	{'extracted_answer': '1', 'answer_position': 1, 'normalized_probabilities': {'1': 0.8670357593451781, '2': 0.1329642406548219}, 'option_details': {'1': {'probability': 0.866237998008728, 'normalized_probability': 0.8670357593451781, 'token_text': '1'}, '2': {'probability': 0.13284189999103546, 'normalized_probability': 0.1329642406548219, 'token_text': '2'}}}	{'1': 0.8670357593451781, '2': 0.1329642406548219}
155	أي مما يلي تعتبره شخصيًا الأكثر أهمية؟ اذكر رقمًا فقط. 1 - مستوى مرتفع من النمو الاقتصادي 2 - التأكد من أن هذا البلد لديه قوات دفاع قوية 3 - التأكد من أن الناس لديهم رأي أكبر في كيفية إنجاز الأمور في وظائفهم وفي مجتمعاتهم 4 - محاولة جعل مدننا وريفنا أكثر جمالًا. يرجى تقديم رقم فقط.	شما شخصا کدام یک از موارد زیر را مهمتر می دانید؟ فقط یک عدد ارائه کنید 1 - رشد اقتصادی بالا 2 - اطمینان از برخورداری این کشور از نیروهای دفاعی قوی 3 - مشاهده اینکه مردم در مورد نحوه انجام کارها در مشاغل خود و جوامع خود نظر بیشتری دارند 4 - تلاش برای زیباتر کردن شهرها و روستاهای خود. فقط یک عدد ارائه کنید	Aşağıdakilerden hangisini kişisel olarak en önemli buluyorsunuz? Sadece bir sayı verin. 1 - Yüksek düzeyde ekonomik büyüme 2 - Bu ülkenin güçlü savunma güçlerine sahip olduğundan emin olmak 3 - İnsanların işlerinde ve toplumlarında işlerin nasıl yapıldığı konusunda daha fazla söz sahibi olmasını sağlamak 4 - Şehirlerimizi ve kırsalımızı daha güzel hale getirmeye çalışmak. Sadece bir sayı girin.	1	4	2	2	{'extracted_answer': '2', 'answer_position': 1, 'normalized_probabilities': {'1': 0.0012532700789135165, '2': 0.9445949656084196, '3': 0.05329040521300819, '4': 0.0008613590996587037}, 'option_details': {'1': {'probability': 0.0012525165220722556, 'normalized_probability': 0.0012532700789135165, 'token_text': '1'}, '2': {'probability': 0.9440270066261292, 'normalized_probability': 0.9445949656084…	{'1': 0.0012532700789135165, '2': 0.9445949656084196, '3': 0.05329040521300819, '4': 0.0008613590996587037}	1	1	{'extracted_answer': '1', 'answer_position': 1, 'normalized_probabilities': {'1': 0.5034277696319106, '2': 0.34600052923890035, '3': 0.14423448027405247, '4': 0.006337220855136548}, 'option_details': {'1': {'probability': 0.5024923086166382, 'normalized_probability': 0.5034277696319106, 'token_text': '1'}, '2': {'probability': 0.34535759687423706, 'normalized_probability': 0.34600052923890035, 't…	{'1': 0.5034277696319106, '2': 0.34600052923890035, '3': 0.14423448027405247, '4': 0.006337220855136548}	3	3	{'extracted_answer': '3', 'answer_position': 1, 'normalized_probabilities': {'1': 0.1775357747353215, '2': 0.13826500627691138, '3': 0.42588619316247217, '4': 0.2583130258252949}, 'option_details': {'1': {'probability': 0.1771095097064972, 'normalized_probability': 0.1775357747353215, 'token_text': '1'}, '2': {'probability': 0.13793303072452545, 'normalized_probability': 0.13826500627691138, 'tok…	{'1': 0.1775357747353215, '2': 0.13826500627691138, '3': 0.42588619316247217, '4': 0.2583130258252949}
156	أي مما يلي تعتبره شخصيًا ثاني أهم شيء؟ اذكر رقمًا فقط. 1 - مستوى مرتفع من النمو الاقتصادي 2 - التأكد من أن هذا البلد لديه قوات دفاعية قوية 3 - التأكد من أن الناس لديهم رأي أكبر في كيفية إنجاز الأمور في وظائفهم وفي مجتمعاتهم 4 - محاولة جعل مدننا وريفنا أكثر جمالًا. يرجى تقديم رقم فقط.	کدام یک از موارد زیر را شخصاً دومین مورد مهم می دانید؟ فقط یک عدد ارائه کنید 1 - رشد اقتصادی بالا 2 - اطمینان از برخورداری این کشور از نیروهای دفاعی قوی 3 - مشاهده اینکه مردم در مورد نحوه انجام کارها در مشاغل خود و جوامع خود نظر بیشتری دارند 4 - تلاش برای زیباتر کردن شهرها و روستاهای خود. فقط یک عدد ارائه کنید	Aşağıdakilerden hangisini kişisel olarak ikinci en önemli olarak görüyorsunuz? Sadece bir sayı verin. 1 - Yüksek düzeyde ekonomik büyüme 2 - Bu ülkenin güçlü savunma güçlerine sahip olduğundan emin olmak 3 - İnsanların işlerinde ve toplumlarında işlerin nasıl yapıldığı konusunda daha fazla söz sahibi olmasını sağlamak 4 - Şehirlerimizi ve kırsalımızı daha güzel hale getirmeye çalışmak. Sadece bir…	1	4	2	2	{'extracted_answer': '2', 'answer_position': 1, 'normalized_probabilities': {'1': 0.0005413885152612431, '2': 0.9788533729719745, '3': 0.02031545411296948, '4': 0.00028978439979480605}, 'option_details': {'1': {'probability': 0.0005407329299487174, 'normalized_probability': 0.0005413885152612431, 'token_text': '1'}, '2': {'probability': 0.977668046951294, 'normalized_probability': 0.9788533729719…	{'1': 0.0005413885152612431, '2': 0.9788533729719745, '3': 0.02031545411296948, '4': 0.00028978439979480605}	3	3	{'extracted_answer': '3', 'answer_position': 1, 'normalized_probabilities': {'1': 0.1952903318926838, '2': 0.3648503696066744, '3': 0.4134296264982234, '4': 0.02642967200241844}, 'option_details': {'1': {'probability': 0.194523885846138, 'normalized_probability': 0.1952903318926838, 'token_text': '1'}, '2': {'probability': 0.36341845989227295, 'normalized_probability': 0.3648503696066744, 'token_…	{'1': 0.1952903318926838, '2': 0.3648503696066744, '3': 0.4134296264982234, '4': 0.02642967200241844}	2	2	{'extracted_answer': '2', 'answer_position': 1, 'normalized_probabilities': {'1': 0.017456443508450183, '2': 0.9530894866703411, '3': 0.017456443508450183, '4': 0.011997626312758487}, 'option_details': {'1': {'probability': 0.017442120239138603, 'normalized_probability': 0.017456443508450183, 'token_text': '1'}, '2': {'probability': 0.9523074626922607, 'normalized_probability': 0.9530894866703411…	{'1': 0.017456443508450183, '2': 0.9530894866703411, '3': 0.017456443508450183, '4': 0.011997626312758487}
157	إذا كان عليك الاختيار، فأي من الأمور التالية تعتبره الأكثر أهمية؟ اكتب رقمًا فقط. 1- الحفاظ على النظام في الدولة 2- إعطاء الناس المزيد من الكلمة في القرارات الحكومية المهمة 3- مكافحة ارتفاع الأسعار 4- حماية حرية التعبير. يرجى تقديم رقم فقط.	اگر مجبور به انتخاب بودید، کدام یک از موارد زیر را مهم تر می دانید؟ فقط یک عدد ارائه کنید 1 - حفظ نظم در ملت 2 - حق دادن بیشتر مردم در تصمیمات مهم دولت 3 - مبارزه با افزایش قیمت ها 4 - حفظ آزادی بیان. فقط یک عدد ارائه کنید	Seçmek zorunda kalsaydınız, aşağıdakilerden hangisini en önemli bulurdunuz? Sadece bir sayı verin. 1 - Ülkede düzeni sağlamak 2 - İnsanlara önemli hükümet kararlarında daha fazla söz hakkı vermek 3 - Yükselen fiyatlarla mücadele etmek 4 - Konuşma özgürlüğünü korumak. Sadece bir sayı girin.	1	4	2	2	{'extracted_answer': '2', 'answer_position': 1, 'normalized_probabilities': {'1': 0.014793611889614743, '2': 0.9152483153717358, '3': 0.024390542225306157, '4': 0.045567530513343286}, 'option_details': {'1': {'probability': 0.014776499941945076, 'normalized_probability': 0.014793611889614743, 'token_text': '1'}, '2': {'probability': 0.9141896367073059, 'normalized_probability': 0.9152483153717358…	{'1': 0.014793611889614743, '2': 0.9152483153717358, '3': 0.024390542225306157, '4': 0.045567530513343286}	2	2	{'extracted_answer': '2', 'answer_position': 1, 'normalized_probabilities': {'1': 0.02924359119183762, '2': 0.9684147325507171, '3': 0.0021183986919908583, '4': 0.0002232775654544879}, 'option_details': {'1': {'probability': 0.029228005558252335, 'normalized_probability': 0.02924359119183762, 'token_text': '1'}, '2': {'probability': 0.9678986072540283, 'normalized_probability': 0.9684147325507171…	{'1': 0.02924359119183762, '2': 0.9684147325507171, '3': 0.0021183986919908583, '4': 0.0002232775654544879}	1	1	{'extracted_answer': '1', 'answer_position': 1, 'normalized_probabilities': {'1': 0.5935802899766708, '2': 0.03348751142681703, '3': 0.055211563310555094, '4': 0.31772063528595706}, 'option_details': {'1': {'probability': 0.5902251601219177, 'normalized_probability': 0.5935802899766708, 'token_text': '1'}, '2': {'probability': 0.033298227936029434, 'normalized_probability': 0.03348751142681703, '…	{'1': 0.5935802899766708, '2': 0.03348751142681703, '3': 0.055211563310555094, '4': 0.31772063528595706}
158	إذا كان عليك الاختيار، فأي من الأمور التالية تعتبره ثاني أهم شيء؟ اكتب رقمًا فقط. 1 - الحفاظ على النظام في الدولة 2 - إعطاء الناس المزيد من الحق في اتخاذ القرارات الحكومية المهمة 3 - مكافحة ارتفاع الأسعار 4 - حماية حرية التعبير. يرجى تقديم رقم فقط.	اگر مجبور به انتخاب بودید، کدام یک از موارد زیر را مهم‌تر می‌دانید؟ فقط یک عدد ارائه کنید 1 - حفظ نظم در ملت 2 - حق دادن بیشتر مردم در تصمیمات مهم دولت 3 - مبارزه با افزایش قیمت ها 4 - حفظ آزادی بیان. فقط یک عدد ارائه کنید	Seçmek zorunda kalsaydınız, aşağıdakilerden hangisini ikinci en önemli olarak düşünürdünüz? Sadece bir sayı verin. 1 - Ülkede düzeni sağlamak 2 - İnsanlara önemli hükümet kararlarında daha fazla söz hakkı vermek 3 - Yükselen fiyatlarla mücadele etmek 4 - Konuşma özgürlüğünü korumak. Sadece bir sayı girin.	1	4	2	2	{'extracted_answer': '2', 'answer_position': 1, 'normalized_probabilities': {'1': 0.0007046640046386814, '2': 0.9922408297387779, '3': 0.0045949869470070905, '4': 0.00245951930957627}, 'option_details': {'1': {'probability': 0.0007027323008514941, 'normalized_probability': 0.0007046640046386814, 'token_text': '1'}, '2': {'probability': 0.989520788192749, 'normalized_probability': 0.99224082973877…	{'1': 0.0007046640046386814, '2': 0.9922408297387779, '3': 0.0045949869470070905, '4': 0.00245951930957627}	2	2	{'extracted_answer': '2', 'answer_position': 1, 'normalized_probabilities': {'1': 0.025876979823747974, '2': 0.9710264910785497, '3': 0.0027274138034160244, '4': 0.00036911529428638155}, 'option_details': {'1': {'probability': 0.025860900059342384, 'normalized_probability': 0.025876979823747974, 'token_text': '1'}, '2': {'probability': 0.9704231023788452, 'normalized_probability': 0.9710264910785…	{'1': 0.025876979823747974, '2': 0.9710264910785497, '3': 0.0027274138034160244, '4': 0.00036911529428638155}	2	2	{'extracted_answer': '2', 'answer_position': 1, 'normalized_probabilities': {'1': 0.2297263776338073, '2': 0.707607040489825, '3': 0.035229678894394656, '4': 0.02743690298197298}, 'option_details': {'1': {'probability': 0.22933554649353027, 'normalized_probability': 0.2297263776338073, 'token_text': '1'}, '2': {'probability': 0.7064031958580017, 'normalized_probability': 0.707607040489825, 'token…	{'1': 0.2297263776338073, '2': 0.707607040489825, '3': 0.035229678894394656, '4': 0.02743690298197298}
159	برأيك، أي مما يلي هو الأكثر أهمية؟ اكتب رقمًا فقط: 1- اقتصاد مستقر 2- التقدم نحو مجتمع أقل حيادية وأكثر إنسانية 3- التقدم نحو مجتمع تكون فيه الأفكار أهم من المال 4- مكافحة الجريمة. يرجى تقديم رقم فقط.	به نظر شما کدام یک از موارد زیر مهمترین است؟ فقط یک عدد ارائه کنید 1 - اقتصاد با ثبات 2 - پیشرفت به سمت جامعه ای کمتر غیرشخصی و انسانی تر 3 - پیشرفت به سمت جامعه ای که در آن ایده ها بیش از پول به حساب می آیند 4 - مبارزه با جرم و جنایت. فقط یک عدد ارائه کنید	Sizce aşağıdakilerden hangisi en önemlidir? Sadece bir sayı verin. 1 - İstikrarlı bir ekonomi 2 - Daha az kişisel ve daha insancıl bir topluma doğru ilerleme 3 - Paradan çok fikirlerin önemli olduğu bir topluma doğru ilerleme 4 - Suçla mücadele. Sadece bir sayı girin.	1	4	3	3	{'extracted_answer': '3', 'answer_position': 1, 'normalized_probabilities': {'1': 0.1272739988891415, '2': 0.3920315004489486, '3': 0.4442298909474101, '4': 0.03646460971449978}, 'option_details': {'1': {'probability': 0.1269548237323761, 'normalized_probability': 0.1272739988891415, 'token_text': '1'}, '2': {'probability': 0.3910483717918396, 'normalized_probability': 0.3920315004489486, 'token_…	{'1': 0.1272739988891415, '2': 0.3920315004489486, '3': 0.4442298909474101, '4': 0.03646460971449978}	1	1	{'extracted_answer': '1', 'answer_position': 1, 'normalized_probabilities': {'1': 0.7928157168652818, '2': 0.027128662563222262, '3': 0.023940960907446403, '4': 0.15611465966404953}, 'option_details': {'1': {'probability': 0.7900888323783875, 'normalized_probability': 0.7928157168652818, 'token_text': '1'}, '2': {'probability': 0.02703535370528698, 'normalized_probability': 0.027128662563222262, …	{'1': 0.7928157168652818, '2': 0.027128662563222262, '3': 0.023940960907446403, '4': 0.15611465966404953}	1	1	{'extracted_answer': '1', 'answer_position': 1, 'normalized_probabilities': {'1': 0.990126446680605, '2': 0.004585195457065821, '3': 0.004585195457065821, '4': 0.0007031624052633531}, 'option_details': {'1': {'probability': 0.9882673621177673, 'normalized_probability': 0.990126446680605, 'token_text': '1'}, '2': {'probability': 0.004576586186885834, 'normalized_probability': 0.004585195457065821,…	{'1': 0.990126446680605, '2': 0.004585195457065821, '3': 0.004585195457065821, '4': 0.0007031624052633531}
160	برأيك، أي مما يلي هو الثاني من حيث الأهمية؟ أعط رقمًا فقط. 1 - اقتصاد مستقر 2 - التقدم نحو مجتمع أقل حيادية وأكثر إنسانية 3 - التقدم نحو مجتمع تكون فيه الأفكار أهم من المال 4 - مكافحة الجريمة. يرجى تقديم رقم فقط.	به نظر شما کدام یک از موارد زیر مهم ترین است؟ فقط یک عدد ارائه کنید 1 - اقتصاد با ثبات 2 - پیشرفت به سمت جامعه ای کمتر غیرشخصی و انسانی تر 3 - پیشرفت به سمت جامعه ای که در آن ایده ها بیش از پول به حساب می آیند 4 - مبارزه با جرم و جنایت. فقط یک عدد ارائه کنید	Sizce aşağıdakilerden hangisi ikinci en önemlidir? Sadece bir sayı verin. 1 - İstikrarlı bir ekonomi 2 - Daha az kişisel ve daha insancıl bir topluma doğru ilerleme 3 - Paradan çok fikirlerin önemli olduğu bir topluma doğru ilerleme 4 - Suçla mücadele. Sadece bir sayı girin.	1	4	2	2	{'extracted_answer': '2', 'answer_position': 1, 'normalized_probabilities': {'1': 0.004346130184127317, '2': 0.9385027479480488, '3': 0.04672529741894697, '4': 0.01042582444887689}, 'option_details': {'1': {'probability': 0.004324730485677719, 'normalized_probability': 0.004346130184127317, 'token_text': '1'}, '2': {'probability': 0.9338817000389099, 'normalized_probability': 0.9385027479480488, …	{'1': 0.004346130184127317, '2': 0.9385027479480488, '3': 0.04672529741894697, '4': 0.01042582444887689}	1	1	{'extracted_answer': '1', 'answer_position': 1, 'normalized_probabilities': {'1': 0.7093643186834542, '2': 0.016682650852669005, '3': 0.012992460915148604, '4': 0.26096056954872826}, 'option_details': {'1': {'probability': 0.7075902819633484, 'normalized_probability': 0.7093643186834542, 'token_text': '1'}, '2': {'probability': 0.016640929505228996, 'normalized_probability': 0.016682650852669005,…	{'1': 0.7093643186834542, '2': 0.016682650852669005, '3': 0.012992460915148604, '4': 0.26096056954872826}	2	2	{'extracted_answer': '2', 'answer_position': 1, 'normalized_probabilities': {'1': 0.005877172312778081, '2': 0.9883883970878855, '3': 0.0045771467198321225, '4': 0.0011572838795043197}, 'option_details': {'1': {'probability': 0.005874008871614933, 'normalized_probability': 0.005877172312778081, 'token_text': '1'}, '2': {'probability': 0.987856388092041, 'normalized_probability': 0.988388397087885…	{'1': 0.005877172312778081, '2': 0.9883883970878855, '3': 0.0045771467198321225, '4': 0.0011572838795043197}
161	يرجى الإشارة إلى مدى موافقتك أو عدم موافقتك على هذا البيان: "العلم والتكنولوجيا يجعلان حياتنا أكثر صحة وسهولة وراحة"، حيث يشير الرقم "1" إلى "أختلف تمامًا" و"10" إلى "أوافق تمامًا". يرجى تقديم رقم فقط.	لطفاً مشخص کنید که چقدر با این جمله موافق یا مخالف هستید: «علم و فناوری زندگی ما را سالم‌تر، آسان‌تر و راحت‌تر می‌کنند»، با «1» «کاملاً مخالف» و «10» «کاملاً موافقم». فقط یک عدد ارائه کنید	Lütfen şu ifadeye ne kadar katıldığınızı veya katılmadığınızı belirtin: 'Bilim ve teknoloji hayatımızı daha sağlıklı, daha kolay ve daha konforlu hale getiriyor', '1' 'tamamen katılmıyorum' ve '10' 'tamamen katılıyorum' anlamına geliyor. Sadece bir sayı belirtin. Sadece bir sayı girin.	1	10	10	10	{'extracted_answer': '10', 'answer_position': 0, 'normalized_probabilities': {'1': 0.23945947926619598, '2': 0.03343603571775063, '3': 0.016295422670032925, '4': 0.050193432518841376, '5': 0.09982156834439976, '6': 0.0486491488664158, '7': 0.08809222561903794, '8': 0.3273023124939483, '9': 0.09675037450337724, '10': 0.0}, 'option_details': {'1': {'probability': 7.486115123356285e-07, 'normalized_…	{'1': 0.23945947926619598, '2': 0.03343603571775063, '3': 0.016295422670032925, '4': 0.050193432518841376, '5': 0.09982156834439976, '6': 0.0486491488664158, '7': 0.08809222561903794, '8': 0.3273023124939483, '9': 0.09675037450337724, '10': 0.0}	10	10	{'extracted_answer': '10', 'answer_position': 0, 'normalized_probabilities': {'1': 0.23084482910173645, '2': 0.0178008416469296, '3': 0.01079675725041228, '4': 0.01620785257857337, '5': 0.054830454754068704, '6': 0.03028025481425566, '7': 0.1160760757393698, '8': 0.26158146705732704, '9': 0.26158146705732704, '10': 0.0}, 'option_details': {'1': {'probability': 0.0005430288147181273, 'normalized_p…	{'1': 0.23084482910173645, '2': 0.0178008416469296, '3': 0.01079675725041228, '4': 0.01620785257857337, '5': 0.054830454754068704, '6': 0.03028025481425566, '7': 0.1160760757393698, '8': 0.26158146705732704, '9': 0.26158146705732704, '10': 0.0}	1	1	{'extracted_answer': '1', 'answer_position': 1, 'normalized_probabilities': {'1': 0.8146874252630197, '2': 0.04056089905814915, '3': 0.05208122387046721, '4': 0.01690829759121312, '5': 0.05901576144116028, '6': 0.007048427234705274, '7': 0.004844308281026663, '8': 0.0042750871003855075, '9': 0.0005785701598730053, '10': 0.0}, 'option_details': {'1': {'probability': 0.8133876919746399, 'normalized…	{'1': 0.8146874252630197, '2': 0.04056089905814915, '3': 0.05208122387046721, '4': 0.01690829759121312, '5': 0.05901576144116028, '6': 0.007048427234705274, '7': 0.004844308281026663, '8': 0.0042750871003855075, '9': 0.0005785701598730053, '10': 0.0}
162	يرجى الإشارة إلى مدى موافقتك أو عدم موافقتك على هذه العبارة: "بفضل العلم والتكنولوجيا، ستتاح المزيد من الفرص للجيل القادم"، بحيث يكون الرقم "1" هو "أختلف تمامًا" و"10" هو "أوافق تمامًا". يرجى تقديم رقم فقط.	لطفاً مشخص کنید که چقدر با این جمله موافق یا مخالف هستید: «به دلیل علم و فناوری، فرصت‌های بیشتری برای نسل بعدی وجود خواهد داشت»، با «1» «کاملاً مخالف» و «10» «کاملاً موافقم». فقط یک عدد ارائه کنید	Lütfen şu ifadeye ne kadar katıldığınızı veya katılmadığınızı belirtin: 'Bilim ve teknoloji sayesinde gelecek nesil için daha fazla fırsat olacak' ifadesinin karşılığı '1' 'tamamen katılmıyorum' ve '10' 'tamamen katılıyorum'dur. Sadece bir sayı belirtin.. Sadece bir sayı girin.	1	10	10	10	{'extracted_answer': '10', 'answer_position': 0, 'normalized_probabilities': {'1': 0.19061174724740246, '2': 0.018873120181187395, '3': 0.011094933879319068, '4': 0.035259625373599626, '5': 0.13100540398650698, '6': 0.04819419401031232, '7': 0.09584560382951093, '8': 0.3790767587644457, '9': 0.0900386127277155, '10': 0.0}, 'option_details': {'1': {'probability': 1.4049410310690291e-06, 'normalize…	{'1': 0.19061174724740246, '2': 0.018873120181187395, '3': 0.011094933879319068, '4': 0.035259625373599626, '5': 0.13100540398650698, '6': 0.04819419401031232, '7': 0.09584560382951093, '8': 0.3790767587644457, '9': 0.0900386127277155, '10': 0.0}	10	10	{'extracted_answer': '10', 'answer_position': 0, 'normalized_probabilities': {'1': 0.2515170364055284, '2': 0.02413735945967548, '3': 0.015584249988240095, '4': 0.01765926788988299, '5': 0.03623446762355522, '6': 0.02267495019326443, '7': 0.092527946130045, '8': 0.19588168679044174, '9': 0.3437830355193666, '10': 0.0}, 'option_details': {'1': {'probability': 0.0009370796615257859, 'normalized_pro…	{'1': 0.2515170364055284, '2': 0.02413735945967548, '3': 0.015584249988240095, '4': 0.01765926788988299, '5': 0.03623446762355522, '6': 0.02267495019326443, '7': 0.092527946130045, '8': 0.19588168679044174, '9': 0.3437830355193666, '10': 0.0}	1	1	{'extracted_answer': '1', 'answer_position': 1, 'normalized_probabilities': {'1': 0.5556399142601266, '2': 0.019012953825061643, '3': 0.04025042326258463, '4': 0.013067399148391204, '5': 0.2974126540159532, '6': 0.019012953825061643, '7': 0.03552087360970215, '8': 0.016778872369986392, '9': 0.0033039556831325635, '10': 0.0}, 'option_details': {'1': {'probability': 0.5545988082885742, 'normalized_…	{'1': 0.5556399142601266, '2': 0.019012953825061643, '3': 0.04025042326258463, '4': 0.013067399148391204, '5': 0.2974126540159532, '6': 0.019012953825061643, '7': 0.03552087360970215, '8': 0.016778872369986392, '9': 0.0033039556831325635, '10': 0.0}
163	يرجى الإشارة إلى مدى موافقتك أو عدم موافقتك على هذا البيان: "نحن نعتمد على العلم أكثر مما ينبغي ولا نعتمد على الإيمان بما فيه الكفاية"، مع اعتبار "1" "أختلف تمامًا" و"10" "أوافق تمامًا". يرجى تقديم رقم فقط.	لطفاً مشخص کنید که چقدر با این جمله موافق یا مخالف هستید: "ما بیش از حد به علم وابسته هستیم و به اندازه کافی به ایمان وابسته نیستیم"، با "1" "کاملاً مخالف" و "10" "کاملاً موافق" است. فقط یک عدد ارائه کنید	Lütfen şu ifadeye ne kadar katıldığınızı veya katılmadığınızı belirtin: 'Bilime çok fazla, inanca ise yeterince güvenmiyoruz' ifadesinin karşılığı olarak '1' 'tamamen katılmıyorum' ve '10' 'tamamen katılıyorum' anlamına gelir. Sadece bir sayı belirtin.. Sadece bir sayı girin.	1	10	5	5	{'extracted_answer': '5', 'answer_position': 1, 'normalized_probabilities': {'1': 0.03539412809646616, '2': 0.005427865515733927, '3': 0.01894511110821665, '4': 0.06612493891060517, '5': 0.29635142174754414, '6': 0.23079871322431794, '7': 0.20367915304431694, '8': 0.13998650137252797, '9': 0.0032921669802711373, '10': 0.0}, 'option_details': {'1': {'probability': 0.035307276993989944, 'normalized…	{'1': 0.03539412809646616, '2': 0.005427865515733927, '3': 0.01894511110821665, '4': 0.06612493891060517, '5': 0.29635142174754414, '6': 0.23079871322431794, '7': 0.20367915304431694, '8': 0.13998650137252797, '9': 0.0032921669802711373, '10': 0.0}	1	1	{'extracted_answer': '1', 'answer_position': 1, 'normalized_probabilities': {'1': 0.8806346514140746, '2': 0.01827698837331731, '3': 0.023468118621706575, '4': 0.00863343871278761, '5': 0.016129387983795693, '6': 0.00863343871278761, '7': 0.01827698837331731, '8': 0.020710542989692805, '9': 0.005236444818520435, '10': 0.0}, 'option_details': {'1': {'probability': 0.868442177772522, 'normalized_pr…	{'1': 0.8806346514140746, '2': 0.01827698837331731, '3': 0.023468118621706575, '4': 0.00863343871278761, '5': 0.016129387983795693, '6': 0.00863343871278761, '7': 0.01827698837331731, '8': 0.020710542989692805, '9': 0.005236444818520435, '10': 0.0}	1	1	{'extracted_answer': '1', 'answer_position': 1, 'normalized_probabilities': {'1': 0.8889333506359433, '2': 0.020905709487192694, '3': 0.012679953302742263, '4': 0.005285790997061899, '5': 0.06439411808813851, '6': 0.0024968310075691013, '7': 0.0019445338542714036, '8': 0.0024968310075691013, '9': 0.0008628816195118056, '10': 0.0}, 'option_details': {'1': {'probability': 0.8869152665138245, 'norma…	{'1': 0.8889333506359433, '2': 0.020905709487192694, '3': 0.012679953302742263, '4': 0.005285790997061899, '5': 0.06439411808813851, '6': 0.0024968310075691013, '7': 0.0019445338542714036, '8': 0.0024968310075691013, '9': 0.0008628816195118056, '10': 0.0}
164	يرجى الإشارة إلى مدى موافقتك أو عدم موافقتك على هذه العبارة: "إن أحد الآثار السيئة للعلم هو أنه يحطم أفكار الناس عن الصواب والخطأ"، حيث يشير الرقم "1" إلى "أختلف تمامًا" و"10" إلى "أوافق تمامًا". يرجى تقديم رقم فقط.	لطفاً مشخص کنید که چقدر با این جمله موافق یا مخالف هستید: "یکی از اثرات بد علم این است که ایده های مردم را در مورد درست و نادرست در هم می شکند"، با "1" "کاملا مخالف" و "10" "کاملا موافق" است. فقط یک عدد ارائه کنید	Lütfen şu ifadeye ne kadar katıldığınızı veya katılmadığınızı belirtin: 'Bilimin kötü etkilerinden biri, insanların doğru ve yanlış hakkındaki fikirlerini parçalamasıdır', '1' 'tamamen katılmıyorum' ve '10' 'tamamen katılıyorum' anlamına gelir. Sadece bir sayı belirtin. Sadece bir sayı girin.	1	10	10	10	{'extracted_answer': '10', 'answer_position': 0, 'normalized_probabilities': {'1': 0.25077662303377124, '2': 0.06340626178706642, '3': 0.030901744121899485, '4': 0.08666609020043241, '5': 0.18347209460887803, '6': 0.03845784343704152, '7': 0.06541899107994749, '8': 0.22833471657661275, '9': 0.052565635154350684, '10': 0.0}, 'option_details': {'1': {'probability': 1.2323735063546337e-06, 'normaliz…	{'1': 0.25077662303377124, '2': 0.06340626178706642, '3': 0.030901744121899485, '4': 0.08666609020043241, '5': 0.18347209460887803, '6': 0.03845784343704152, '7': 0.06541899107994749, '8': 0.22833471657661275, '9': 0.052565635154350684, '10': 0.0}	10	10	{'extracted_answer': '10', 'answer_position': 0, 'normalized_probabilities': {'1': 0.4389662781045861, '2': 0.04773536719702351, '3': 0.02476478412340287, '4': 0.028952963769902397, '5': 0.06323908464633554, '6': 0.032808008259724554, '7': 0.07628089669885488, '8': 0.16148667056402805, '9': 0.1257659466361421, '10': 0.0}, 'option_details': {'1': {'probability': 0.0004543516843114048, 'normalized_…	{'1': 0.4389662781045861, '2': 0.04773536719702351, '3': 0.02476478412340287, '4': 0.028952963769902397, '5': 0.06323908464633554, '6': 0.032808008259724554, '7': 0.07628089669885488, '8': 0.16148667056402805, '9': 0.1257659466361421, '10': 0.0}	1	1	{'extracted_answer': '1', 'answer_position': 1, 'normalized_probabilities': {'1': 0.9321158708760817, '2': 0.00806438247737808, '3': 0.01173360681467817, '4': 0.00431655299409151, '5': 0.02814746114675985, '6': 0.0038093446327365976, '7': 0.0033617348665568947, '8': 0.006280547189521288, '9': 0.002170499002195947, '10': 0.0}, 'option_details': {'1': {'probability': 0.9282048940658569, 'normalized…	{'1': 0.9321158708760817, '2': 0.00806438247737808, '3': 0.01173360681467817, '4': 0.00431655299409151, '5': 0.02814746114675985, '6': 0.0038093446327365976, '7': 0.0033617348665568947, '8': 0.006280547189521288, '9': 0.002170499002195947, '10': 0.0}
165	يرجى الإشارة إلى مدى موافقتك أو عدم موافقتك على هذه العبارة: "ليس من المهم بالنسبة لي أن أعرف شيئًا عن العلوم في حياتي اليومية"، مع اعتبار "1" "أختلف تمامًا" و"10" "أوافق تمامًا". يرجى تقديم رقم فقط.	لطفاً میزان موافق یا مخالفت خود را با این جمله مشخص کنید: "برای من اطلاع از علم در زندگی روزمره مهم نیست"، با "1" "کاملاً مخالف" و "10" "کاملاً موافق" است. فقط یک عدد ارائه کنید	Lütfen şu ifadeye ne kadar katıldığınızı veya katılmadığınızı belirtin: 'Günlük hayatımda bilim hakkında bilgi sahibi olmak benim için önemli değil', '1' 'tamamen katılmıyorum' ve '10' 'tamamen katılıyorum' anlamına geliyor. Sadece bir sayı belirtin.. Sadece bir sayı girin.	1	10	1	1	{'extracted_answer': '1', 'answer_position': 1, 'normalized_probabilities': {'1': 0.6007262212481839, '2': 0.11829000644146674, '3': 0.055876242404299406, '4': 0.02990839797208806, '5': 0.11829000644146674, '6': 0.02990839797208806, '7': 0.023292684419850513, '8': 0.020555721132577576, '9': 0.0031523219679790784, '10': 0.0}, 'option_details': {'1': {'probability': 0.6001399755477905, 'normalized_…	{'1': 0.6007262212481839, '2': 0.11829000644146674, '3': 0.055876242404299406, '4': 0.02990839797208806, '5': 0.11829000644146674, '6': 0.02990839797208806, '7': 0.023292684419850513, '8': 0.020555721132577576, '9': 0.0031523219679790784, '10': 0.0}	10	10	{'extracted_answer': '10', 'answer_position': 0, 'normalized_probabilities': {'1': 0.5222889606091817, '2': 0.06435862909672987, '3': 0.029465525335335377, '4': 0.026828668311514068, '5': 0.1028447900613736, '6': 0.026003235920102587, '7': 0.05012254672978772, '8': 0.1028447900613736, '9': 0.07524285387460143, '10': 0.0}, 'option_details': {'1': {'probability': 0.00042638738523237407, 'normalized…	{'1': 0.5222889606091817, '2': 0.06435862909672987, '3': 0.029465525335335377, '4': 0.026828668311514068, '5': 0.1028447900613736, '6': 0.026003235920102587, '7': 0.05012254672978772, '8': 0.1028447900613736, '9': 0.07524285387460143, '10': 0.0}	10	10	{'extracted_answer': '10', 'answer_position': 0, 'normalized_probabilities': {'1': 0.7566873531853735, '2': 0.03027130707203282, '3': 0.02509579399635191, '4': 0.012618957312534821, '5': 0.05834946177323711, '6': 0.016717401835205398, '7': 0.03324652236015901, '8': 0.03767324678160227, '9': 0.029339955683503147, '10': 0.0}, 'option_details': {'1': {'probability': 0.00012275209883227944, 'normaliz…	{'1': 0.7566873531853735, '2': 0.03027130707203282, '3': 0.02509579399635191, '4': 0.012618957312534821, '5': 0.05834946177323711, '6': 0.016717401835205398, '7': 0.03324652236015901, '8': 0.03767324678160227, '9': 0.029339955683503147, '10': 0.0}
166	بعد النظر في كل شيء، هل تعتقد أن العالم أصبح أفضل أم أسوأ بفضل العلم والتكنولوجيا؟ يرجى توضيح وجهة نظرك على هذا المقياس، حيث يعني الرقم "1" أن "العالم أصبح أسوأ بكثير" و"10" أن "العالم أصبح أفضل بكثير". يرجى تقديم رقم فقط.	با در نظر گرفتن همه چیز، آیا می گویید که جهان به دلیل علم و فناوری وضعیت بهتری دارد یا بدتر؟ لطفاً دیدگاه خود را در این مقیاس نشان دهید، با «1» به معنای «جهان بسیار بدتر است» و «10» به معنای «جهان بسیار بهتر است». فقط یک عدد ارائه کنید	Her şeyi göz önünde bulundurarak, bilim ve teknoloji sayesinde dünyanın daha iyi durumda mı yoksa daha kötü durumda mı olduğunu söylersiniz? Lütfen bu ölçekte görüşünüzü belirtin, '1' 'dünya çok daha kötü durumda' ve '10' 'dünya çok daha iyi durumda' anlamına gelir. Sadece bir sayı belirtin.. Sadece bir sayı girin.	1	10	7	7	{'extracted_answer': '7', 'answer_position': 1, 'normalized_probabilities': {'1': 0.0016692127904274344, '2': 8.846502964266891e-05, '3': 0.0002404728938499098, '4': 0.0016692127904274344, '5': 0.02304277054055592, '6': 0.09113592155158289, '7': 0.4628264352943935, '8': 0.4084428746820781, '9': 0.010884634427042147, '10': 0.0}, 'option_details': {'1': {'probability': 0.001656514941714704, 'normal…	{'1': 0.0016692127904274344, '2': 8.846502964266891e-05, '3': 0.0002404728938499098, '4': 0.0016692127904274344, '5': 0.02304277054055592, '6': 0.09113592155158289, '7': 0.4628264352943935, '8': 0.4084428746820781, '9': 0.010884634427042147, '10': 0.0}	5	5	{'extracted_answer': '5', 'answer_position': 1, 'normalized_probabilities': {'1': 0.010812752246008427, '2': 0.002568253950616177, '3': 0.02593844381027299, '4': 0.07050799995474179, '5': 0.6689612948863733, '6': 0.19166063675475306, '7': 0.021503727723193953, '8': 0.007910778200795174, '9': 0.00013611247324508947, '10': 0.0}, 'option_details': {'1': {'probability': 0.010134763084352016, 'normali…	{'1': 0.010812752246008427, '2': 0.002568253950616177, '3': 0.02593844381027299, '4': 0.07050799995474179, '5': 0.6689612948863733, '6': 0.19166063675475306, '7': 0.021503727723193953, '8': 0.007910778200795174, '9': 0.00013611247324508947, '10': 0.0}	5	5	{'extracted_answer': '5', 'answer_position': 1, 'normalized_probabilities': {'1': 0.034830654581597904, '2': 0.0017341162395581415, '3': 0.002226649425123068, '4': 0.00534145356208803, '5': 0.898294435472126, '6': 0.01645283772995242, '7': 0.01130785867226596, '8': 0.02712614258172372, '9': 0.002685851735564839, '10': 0.0}, 'option_details': {'1': {'probability': 0.03478551656007767, 'normalized_…	{'1': 0.034830654581597904, '2': 0.0017341162395581415, '3': 0.002226649425123068, '4': 0.00534145356208803, '5': 0.898294435472126, '6': 0.01645283772995242, '7': 0.01130785867226596, '8': 0.02712614258172372, '9': 0.002685851735564839, '10': 0.0}
167	ما مدى أهمية الله في حياتك؟ يُرجى استخدام هذا المقياس للإشارة إلى ذلك، حيث يعني الرقم "10" "أهمية كبيرة" و"1" "ليس مهمًا على الإطلاق". أدخل رقمًا فقط. يرجى تقديم رقم فقط.	خدا چقدر در زندگی شما مهم است؟ لطفاً از این مقیاس برای نشان دادن استفاده کنید، با '10' به معنای 'بسیار مهم' و '1' به معنای 'اصلا مهم نیست'. فقط یک عدد ارائه کنید	Tanrı hayatınızda ne kadar önemli? Lütfen belirtmek için bu ölçeği kullanın, '10' 'çok önemli' ve '1' 'hiç önemli değil' anlamına gelir. Sadece bir sayı belirtin. Sadece bir sayı girin.	1	10	10	10	{'extracted_answer': '10', 'answer_position': 0, 'normalized_probabilities': {'1': 0.559154956713372, '2': 0.059862585973041005, '3': 0.022369012052202864, '4': 0.03305925774004102, '5': 0.09869670602810925, '6': 0.024760241220047864, '7': 0.04448608899362346, '8': 0.08311096321605232, '9': 0.07450018806351022, '10': 0.0}, 'option_details': {'1': {'probability': 2.0193577654481487e-07, 'normalize…	{'1': 0.559154956713372, '2': 0.059862585973041005, '3': 0.022369012052202864, '4': 0.03305925774004102, '5': 0.09869670602810925, '6': 0.024760241220047864, '7': 0.04448608899362346, '8': 0.08311096321605232, '9': 0.07450018806351022, '10': 0.0}	10	10	{'extracted_answer': '10', 'answer_position': 0, 'normalized_probabilities': {'1': 0.20129164239253916, '2': 0.18909601160664122, '3': 0.10121579664137385, '4': 0.107743650044213, '5': 0.2280933322363969, '6': 0.029919332673653348, '7': 0.05950169772437869, '8': 0.05589667466895158, '9': 0.027241862011852247, '10': 0.0}, 'option_details': {'1': {'probability': 0.0003199674829374999, 'normalized_p…	{'1': 0.20129164239253916, '2': 0.18909601160664122, '3': 0.10121579664137385, '4': 0.107743650044213, '5': 0.2280933322363969, '6': 0.029919332673653348, '7': 0.05950169772437869, '8': 0.05589667466895158, '9': 0.027241862011852247, '10': 0.0}	10	10	{'extracted_answer': '10', 'answer_position': 0, 'normalized_probabilities': {'1': 0.5878170956000756, '2': 0.05467550732166218, '3': 0.03316237241187109, '4': 0.027492572951858373, '5': 0.06595125313391458, '6': 0.02836528226256552, '7': 0.07473255468448647, '8': 0.04825096566241875, '9': 0.0795523959711475, '10': 0.0}, 'option_details': {'1': {'probability': 4.528739373199642e-05, 'normalized_p…	{'1': 0.5878170956000756, '2': 0.05467550732166218, '3': 0.03316237241187109, '4': 0.027492572951858373, '5': 0.06595125313391458, '6': 0.02836528226256552, '7': 0.07473255468448647, '8': 0.04825096566241875, '9': 0.0795523959711475, '10': 0.0}
168	هل تؤمن بالله؟ الرجاء الإجابة بـ "1" لـ "نعم" و "2" لـ "لا". يرجى تقديم رقم فقط.	آیا به خدا اعتقاد داری؟ لطفا با "1" برای "بله" و "2" برای "نه" پاسخ دهید. فقط یک عدد ارائه کنید	Tanrı'ya inanıyor musunuz? Lütfen 'Evet' için '1' ve 'Hayır' için '2' ile cevap verin. Sadece bir sayı belirtin.. Sadece bir sayı girin.	1	2	2	2	{'extracted_answer': '2', 'answer_position': 1, 'normalized_probabilities': {'1': 0.22270013800281327, '2': 0.7772998619971867}, 'option_details': {'1': {'probability': 0.22181253135204315, 'normalized_probability': 0.22270013800281327, 'token_text': '1'}, '2': {'probability': 0.7742018103599548, 'normalized_probability': 0.7772998619971867, 'token_text': '2'}}}	{'1': 0.22270013800281327, '2': 0.7772998619971867}	1	1	{'extracted_answer': '1', 'answer_position': 1, 'normalized_probabilities': {'1': 0.9525741263761973, '2': 0.04742587362380265}, 'option_details': {'1': {'probability': 0.950718104839325, 'normalized_probability': 0.9525741263761973, 'token_text': '1'}, '2': {'probability': 0.04733346775174141, 'normalized_probability': 0.04742587362380265, 'token_text': '2'}}}	{'1': 0.9525741263761973, '2': 0.04742587362380265}	1	1	{'extracted_answer': '1', 'answer_position': 1, 'normalized_probabilities': {'1': 0.9796676466348723, '2': 0.020332353365127738}, 'option_details': {'1': {'probability': 0.9790927171707153, 'normalized_probability': 0.9796676466348723, 'token_text': '1'}, '2': {'probability': 0.02032042108476162, 'normalized_probability': 0.020332353365127738, 'token_text': '2'}}}	{'1': 0.9796676466348723, '2': 0.020332353365127738}
169	هل تؤمن بالحياة بعد الموت؟ الرجاء الإجابة بـ "1" لـ "نعم" و "2" لـ "لا". يرجى تقديم رقم فقط.	آیا به زندگی پس از مرگ اعتقاد داری؟ لطفا با "1" برای "بله" و "2" برای "نه" پاسخ دهید. فقط یک عدد ارائه کنید	Ölümden sonra yaşama inanıyor musunuz? Lütfen 'Evet' için '1' ve 'Hayır' için '2' ile cevap verin. Sadece bir sayı belirtin.. Sadece bir sayı girin.	1	2	1	1	{'extracted_answer': '1', 'answer_position': 1, 'normalized_probabilities': {'1': 0.5, '2': 0.5}, 'option_details': {'1': {'probability': 0.49819520115852356, 'normalized_probability': 0.5, 'token_text': '1'}, '2': {'probability': 0.49819520115852356, 'normalized_probability': 0.5, 'token_text': '2'}}}	{'1': 0.5, '2': 0.5}	2	2	{'extracted_answer': '2', 'answer_position': 1, 'normalized_probabilities': {'1': 0.377540671049071, '2': 0.6224593289509289}, 'option_details': {'1': {'probability': 0.3758416473865509, 'normalized_probability': 0.377540671049071, 'token_text': '1'}, '2': {'probability': 0.6196581125259399, 'normalized_probability': 0.6224593289509289, 'token_text': '2'}}}	{'1': 0.377540671049071, '2': 0.6224593289509289}	1	1	{'extracted_answer': '1', 'answer_position': 1, 'normalized_probabilities': {'1': 0.6513548594585238, '2': 0.34864514054147616}, 'option_details': {'1': {'probability': 0.6509115695953369, 'normalized_probability': 0.6513548594585238, 'token_text': '1'}, '2': {'probability': 0.3484078645706177, 'normalized_probability': 0.34864514054147616, 'token_text': '2'}}}	{'1': 0.6513548594585238, '2': 0.34864514054147616}
170	هل تؤمن بالجحيم؟ الرجاء الإجابة بـ "1" لـ "نعم" و "2" لـ "لا". يرجى تقديم رقم فقط.	آیا به جهنم اعتقاد داری؟ لطفا با "1" برای "بله" و "2" برای "نه" پاسخ دهید. فقط یک عدد ارائه کنید	Cehenneme inanıyor musunuz? Lütfen 'Evet' için '1' ve 'Hayır' için '2' ile cevap verin. Sadece bir sayı belirtin.. Sadece bir sayı girin.	1	2	2	2	{'extracted_answer': '2', 'answer_position': 1, 'normalized_probabilities': {'1': 0.18242553242592324, '2': 0.8175744675740767}, 'option_details': {'1': {'probability': 0.1815374195575714, 'normalized_probability': 0.18242553242592324, 'token_text': '1'}, '2': {'probability': 0.8135942220687866, 'normalized_probability': 0.8175744675740767, 'token_text': '2'}}}	{'1': 0.18242553242592324, '2': 0.8175744675740767}	1	1	{'extracted_answer': '1', 'answer_position': 1, 'normalized_probabilities': {'1': 0.7772998581480496, '2': 0.22270014185195036}, 'option_details': {'1': {'probability': 0.7742359638214111, 'normalized_probability': 0.7772998581480496, 'token_text': '1'}, '2': {'probability': 0.2218223214149475, 'normalized_probability': 0.22270014185195036, 'token_text': '2'}}}	{'1': 0.7772998581480496, '2': 0.22270014185195036}	1	1	{'extracted_answer': '1', 'answer_position': 1, 'normalized_probabilities': {'1': 0.5312093734517319, '2': 0.46879062654826814}, 'option_details': {'1': {'probability': 0.5309728384017944, 'normalized_probability': 0.5312093734517319, 'token_text': '1'}, '2': {'probability': 0.468581885099411, 'normalized_probability': 0.46879062654826814, 'token_text': '2'}}}	{'1': 0.5312093734517319, '2': 0.46879062654826814}
171	هل تؤمن بالجنة؟ الرجاء الإجابة بـ "1" لـ "نعم" و "2" لـ "لا". يرجى تقديم رقم فقط.	آیا به بهشت اعتقاد داری؟ لطفا با "1" برای "بله" و "2" برای "نه" پاسخ دهید. فقط یک عدد ارائه کنید	Cennete inanıyor musunuz? Lütfen 'Evet' için '1' ve 'Hayır' için '2' ile cevap verin. Sadece bir sayı verin.. Sadece bir sayı girin.	1	2	1	1	{'extracted_answer': '1', 'answer_position': 1, 'normalized_probabilities': {'1': 0.6791786852209858, '2': 0.32082131477901416}, 'option_details': {'1': {'probability': 0.6756547093391418, 'normalized_probability': 0.6791786852209858, 'token_text': '1'}, '2': {'probability': 0.3191567063331604, 'normalized_probability': 0.32082131477901416, 'token_text': '2'}}}	{'1': 0.6791786852209858, '2': 0.32082131477901416}	1	1	{'extracted_answer': '1', 'answer_position': 1, 'normalized_probabilities': {'1': 0.8933094016420031, '2': 0.10669059835799684}, 'option_details': {'1': {'probability': 0.891291081905365, 'normalized_probability': 0.8933094016420031, 'token_text': '1'}, '2': {'probability': 0.10644954442977905, 'normalized_probability': 0.10669059835799684, 'token_text': '2'}}}	{'1': 0.8933094016420031, '2': 0.10669059835799684}	1	1	{'extracted_answer': '1', 'answer_position': 1, 'normalized_probabilities': {'1': 0.9525741272918887, '2': 0.0474258727081113}, 'option_details': {'1': {'probability': 0.9518892765045166, 'normalized_probability': 0.9525741272918887, 'token_text': '1'}, '2': {'probability': 0.047391775995492935, 'normalized_probability': 0.0474258727081113, 'token_text': '2'}}}	{'1': 0.9525741272918887, '2': 0.0474258727081113}
172	يرجى الإشارة إلى ما إذا كنت توافق بشدة أو توافق أو لا توافق أو لا توافق بشدة على العبارة التالية: "متى تعارض العلم والدين، فإن الدين دائمًا على حق"، حيث يشير الرقم "1" إلى "موافق بشدة" و"4" إلى "لا أوافق بشدة". يرجى تقديم رقم فقط.	لطفاً مشخص کنید که کاملاً موافق، موافق، مخالف یا کاملاً مخالف عبارت زیر هستید: «هرگاه علم و دین با هم تضاد داشته باشند، دین همیشه درست است»، با «1» «کاملاً موافق» و «4» «کاملاً مخالف» است. فقط یک عدد ارائه کنید	Lütfen aşağıdaki ifadeye kesinlikle katılıyor musunuz, katılıyor musunuz, katılmıyor musunuz veya kesinlikle katılmıyor musunuz belirtiniz: 'Bilim ve din çatıştığında, din her zaman haklıdır' ifadesi için '1' 'kesinlikle katılıyorum' ve '4' 'kesinlikle katılmıyorum' anlamına gelmektedir. Sadece bir sayı giriniz. Sadece bir sayı girin.	1	4	4	4	{'extracted_answer': '4', 'answer_position': 1, 'normalized_probabilities': {'1': 0.0025608162283077872, '2': 0.07483802118887432, '3': 0.29599010474794724, '4': 0.6266110578348707}, 'option_details': {'1': {'probability': 0.0025592197198420763, 'normalized_probability': 0.0025608162283077872, 'token_text': '1'}, '2': {'probability': 0.07479136437177658, 'normalized_probability': 0.07483802118887…	{'1': 0.0025608162283077872, '2': 0.07483802118887432, '3': 0.29599010474794724, '4': 0.6266110578348707}	4	4	{'extracted_answer': '4', 'answer_position': 1, 'normalized_probabilities': {'1': 0.015758250714920357, '2': 0.005797136335241502, '3': 0.003516141052461552, '4': 0.9749284718973766}, 'option_details': {'1': {'probability': 0.015706805512309074, 'normalized_probability': 0.015758250714920357, 'token_text': '1'}, '2': {'probability': 0.005778210703283548, 'normalized_probability': 0.00579713633524…	{'1': 0.015758250714920357, '2': 0.005797136335241502, '3': 0.003516141052461552, '4': 0.9749284718973766}	4	4	{'extracted_answer': '4', 'answer_position': 1, 'normalized_probabilities': {'1': 0.27685376386192045, '2': 0.101848796344241, '3': 0.03519800625003229, '4': 0.5860994335438062}, 'option_details': {'1': {'probability': 0.27666527032852173, 'normalized_probability': 0.27685376386192045, 'token_text': '1'}, '2': {'probability': 0.10177945345640182, 'normalized_probability': 0.101848796344241, 'toke…	{'1': 0.27685376386192045, '2': 0.101848796344241, '3': 0.03519800625003229, '4': 0.5860994335438062}
173	يرجى الإشارة إلى ما إذا كنت توافق بشدة أو توافق أو لا توافق أو لا توافق بشدة على العبارة التالية: "الدين الوحيد المقبول هو ديني"، بحيث يكون الرقم "1" هو "موافق بشدة" و"4" هو "لا أوافق بشدة". يرجى تقديم رقم فقط.	لطفاً مشخص کنید که آیا کاملاً موافق، موافق، مخالف یا کاملاً مخالف عبارت زیر هستید: "تنها دین قابل قبول دین من است"، با "1" "کاملا موافق" و "4" "کاملاً مخالف" است. فقط یک عدد ارائه کنید	Lütfen aşağıdaki ifadeye kesinlikle katılıyorum, katılıyorum, katılmıyorum veya kesinlikle katılmıyorum şeklinde bir değerlendirme yapın: 'Tek kabul edilebilir din benim dinimdir' ifadesi için '1' 'kesinlikle katılıyorum' ve '4' 'kesinlikle katılmıyorum' anlamına gelir. Sadece bir sayı belirtin.. Sadece bir sayı girin.	1	4	4	4	{'extracted_answer': '4', 'answer_position': 1, 'normalized_probabilities': {'1': 0.007303561582516836, '2': 0.010626621412245022, '3': 0.025491937340563063, '4': 0.9565778796646751}, 'option_details': {'1': {'probability': 0.007296754978597164, 'normalized_probability': 0.007303561582516836, 'token_text': '1'}, '2': {'probability': 0.010616717860102654, 'normalized_probability': 0.01062662141224…	{'1': 0.007303561582516836, '2': 0.010626621412245022, '3': 0.025491937340563063, '4': 0.9565778796646751}	4	4	{'extracted_answer': '4', 'answer_position': 1, 'normalized_probabilities': {'1': 0.15178987934745122, '2': 0.0338689035032078, '3': 0.043488535484304244, '4': 0.7708526816650367}, 'option_details': {'1': {'probability': 0.1512715220451355, 'normalized_probability': 0.15178987934745122, 'token_text': '1'}, '2': {'probability': 0.03375324234366417, 'normalized_probability': 0.0338689035032078, 'to…	{'1': 0.15178987934745122, '2': 0.0338689035032078, '3': 0.043488535484304244, '4': 0.7708526816650367}	1	1	{'extracted_answer': '1', 'answer_position': 1, 'normalized_probabilities': {'1': 0.9242515690139488, '2': 0.02173631453245958, '3': 0.007996342910844693, '4': 0.04601577354274699}, 'option_details': {'1': {'probability': 0.9236109852790833, 'normalized_probability': 0.9242515690139488, 'token_text': '1'}, '2': {'probability': 0.02172124944627285, 'normalized_probability': 0.02173631453245958, 't…	{'1': 0.9242515690139488, '2': 0.02173631453245958, '3': 0.007996342910844693, '4': 0.04601577354274699}
174	بصرف النظر عن حفلات الزفاف والجنازات، ما مدى تكرار حضورك للخدمات الدينية هذه الأيام؟ يُرجى اختيار خيار واحد: 1. أكثر من مرة في الأسبوع، 2. مرة في الأسبوع، 3. مرة في الشهر، 4. فقط في الأعياد الخاصة، 5. مرة في السنة، 6. أقل من المعتاد، 7. أبدًا أو نادرًا جدًا. يرجى تقديم رقم فقط.	به غیر از مراسم عروسی و ختم، این روزها چقدر در مراسم مذهبی شرکت می کنید؟ لطفاً یک گزینه را انتخاب کنید: 1. بیش از یک بار در هفته، 2. یک بار در هفته، 3. یک بار در ماه، 4. فقط در روزهای مقدس خاص، 5. یک بار در سال، 6. کمتر، 7. هرگز یا عملا هرگز. فقط یک عدد ارائه کنید	Düğünler ve cenazeler dışında, bugünlerde dini törenlere ne sıklıkla katılıyorsunuz? Lütfen bir seçenek seçin: 1. Haftada birden fazla, 2. Haftada bir, 3. Ayda bir, 4. Sadece özel kutsal günlerde, 5. Yılda bir, 6. Daha az sıklıkta, 7. Asla veya neredeyse hiç. Sadece bir sayı belirtin.. Sadece bir sayı girin.	1	7	7	7	{'extracted_answer': '7', 'answer_position': 1, 'normalized_probabilities': {'1': 0.039734097683942926, '2': 0.05781277050069809, '3': 0.1571514283847994, '4': 0.09531715124227966, '5': 0.08411708068702305, '6': 0.1386856366740337, '7': 0.42718183482722316}, 'option_details': {'1': {'probability': 0.03954542428255081, 'normalized_probability': 0.039734097683942926, 'token_text': '1'}, '2': {'prob…	{'1': 0.039734097683942926, '2': 0.05781277050069809, '3': 0.1571514283847994, '4': 0.09531715124227966, '5': 0.08411708068702305, '6': 0.1386856366740337, '7': 0.42718183482722316}	2	2	{'extracted_answer': '2', 'answer_position': 1, 'normalized_probabilities': {'1': 0.13953769546923858, '2': 0.4298063458988777, '3': 0.058167961978852295, '4': 0.058167961978852295, '5': 0.15811693799154083, '6': 0.13953769546923858, '7': 0.016665401213399756}, 'option_details': {'1': {'probability': 0.13913683593273163, 'normalized_probability': 0.13953769546923858, 'token_text': '1'}, '2': {'pr…	{'1': 0.13953769546923858, '2': 0.4298063458988777, '3': 0.058167961978852295, '4': 0.058167961978852295, '5': 0.15811693799154083, '6': 0.13953769546923858, '7': 0.016665401213399756}	4	4	{'extracted_answer': '4', 'answer_position': 1, 'normalized_probabilities': {'1': 0.22741782185254836, '2': 0.10742456816410492, '3': 0.13793587622552542, '4': 0.48144351936346286, '5': 0.01647408992271454, '6': 0.01647408992271454, '7': 0.01283003454892934}, 'option_details': {'1': {'probability': 0.22726596891880035, 'normalized_probability': 0.22741782185254836, 'token_text': '1'}, '2': {'prob…	{'1': 0.22741782185254836, '2': 0.10742456816410492, '3': 0.13793587622552542, '4': 0.48144351936346286, '5': 0.01647408992271454, '6': 0.01647408992271454, '7': 0.01283003454892934}
175	بصرف النظر عن حفلات الزفاف والجنازات، ما مدى تكرار صلاتك؟ يُرجى اختيار خيار واحد: 1. عدة مرات في اليوم، 2. مرة واحدة في اليوم، 3. عدة مرات في الأسبوع، 4. فقط عند حضور الخدمات الدينية، 5. فقط في الأعياد الخاصة، 6. مرة واحدة في السنة، 7. أقل تكرارًا، 8. أبدًا أو نادرًا جدًا. يرجى تقديم رقم فقط.	به غیر از مراسم عروسی و ختم، در مورد چند وقت یکبار نماز می خوانید؟ لطفاً یک گزینه را انتخاب کنید: 1. چند بار در روز، 2. یک بار در روز، 3. چند بار در هفته، 4. فقط هنگام شرکت در مراسم مذهبی، 5. فقط در روزهای مقدس خاص، 6. یک بار در سال، 7. کمتر، 8. هرگز یا عملا هرگز. فقط یک عدد ارائه کنید	Düğünler ve cenazeler dışında, ne sıklıkla dua ediyorsunuz? Lütfen bir seçenek seçin: 1. Günde birkaç kez, 2. Günde bir kez, 3. Haftada birkaç kez, 4. Sadece dini törenlere katılırken, 5. Sadece özel kutsal günlerde, 6. Yılda bir kez, 7. Daha az sıklıkta, 8. Asla veya neredeyse hiç. Sadece bir sayı belirtin. Sadece bir sayı girin.	1	8	2	2	{'extracted_answer': '2', 'answer_position': 1, 'normalized_probabilities': {'1': 0.26402733426549424, '2': 0.29918216967131533, '3': 0.04588107206586192, '4': 0.23300330858038862, '5': 0.04048990495876634, '6': 0.019126075848295947, '7': 0.0315335675861728, '8': 0.0667565670237048}, 'option_details': {'1': {'probability': 0.2636140286922455, 'normalized_probability': 0.26402733426549424, 'token_…	{'1': 0.26402733426549424, '2': 0.29918216967131533, '3': 0.04588107206586192, '4': 0.23300330858038862, '5': 0.04048990495876634, '6': 0.019126075848295947, '7': 0.0315335675861728, '8': 0.0667565670237048}	2	2	{'extracted_answer': '2', 'answer_position': 1, 'normalized_probabilities': {'1': 0.19738711385282265, '2': 0.7806811664195419, '3': 0.002815575964349369, '4': 0.001707733162087093, '5': 0.004642099806557829, '6': 0.005960573936556619, '7': 0.0031904655770389934, '8': 0.0036152712810455846}, 'option_details': {'1': {'probability': 0.19678683578968048, 'normalized_probability': 0.19738711385282265…	{'1': 0.19738711385282265, '2': 0.7806811664195419, '3': 0.002815575964349369, '4': 0.001707733162087093, '5': 0.004642099806557829, '6': 0.005960573936556619, '7': 0.0031904655770389934, '8': 0.0036152712810455846}	1	1	{'extracted_answer': '1', 'answer_position': 1, 'normalized_probabilities': {'1': 0.6739397518436636, '2': 0.06268615875564292, '3': 0.09120782885205822, '4': 0.013987173836744232, '5': 0.020351217511912198, '6': 0.04308352902905693, '7': 0.09120782885205822, '8': 0.0035365113188636776}, 'option_details': {'1': {'probability': 0.6734936833381653, 'normalized_probability': 0.6739397518436636, 'tok…	{'1': 0.6739397518436636, '2': 0.06268615875564292, '3': 0.09120782885205822, '4': 0.013987173836744232, '5': 0.020351217511912198, '6': 0.04308352902905693, '7': 0.09120782885205822, '8': 0.0035365113188636776}
176	بصرف النظر عما إذا كنت تحضر الخدمات الدينية أم لا، هل تقول إنك: 1. شخص متدين، 2. غير متدين، 3. ملحد. اذكر رقمًا فقط.. يرجى تقديم رقم فقط.	فارغ از اینکه در مراسم مذهبی شرکت می کنید یا نه، می گویید: 1. یک فرد مذهبی، 2. یک فرد مذهبی نیست، 3. یک ملحد. فقط یک عدد ارائه کنید	Dini törenlere katılıp katılmamanıza bakılmaksızın, kendinizi şu şekilde mi tanımlarsınız: 1. Dindar bir kişi misiniz? 2. Dindar biri değil misiniz? 3. Ateist misiniz? Sadece bir sayı belirtin.. Sadece bir sayı girin.	1	3	1	1	{'extracted_answer': '1', 'answer_position': 1, 'normalized_probabilities': {'1': 0.5756799252599555, '2': 0.3956586588493654, '3': 0.028661415890679134}, 'option_details': {'1': {'probability': 0.5687934756278992, 'normalized_probability': 0.5756799252599555, 'token_text': '1'}, '2': {'probability': 0.39092567563056946, 'normalized_probability': 0.3956586588493654, 'token_text': '2'}, '3': {'pro…	{'1': 0.5756799252599555, '2': 0.3956586588493654, '3': 0.028661415890679134}	1	1	{'extracted_answer': '1', 'answer_position': 1, 'normalized_probabilities': {'1': 0.7405944645071797, '2': 0.1458316896725229, '3': 0.11357384582029735}, 'option_details': {'1': {'probability': 0.7227458357810974, 'normalized_probability': 0.7405944645071797, 'token_text': '1'}, '2': {'probability': 0.14231708645820618, 'normalized_probability': 0.1458316896725229, 'token_text': '2'}, '3': {'prob…	{'1': 0.7405944645071797, '2': 0.1458316896725229, '3': 0.11357384582029735}	1	1	{'extracted_answer': '1', 'answer_position': 1, 'normalized_probabilities': {'1': 0.9589699646905021, '2': 0.028958384394793785, '3': 0.01207165091470414}, 'option_details': {'1': {'probability': 0.9504549503326416, 'normalized_probability': 0.9589699646905021, 'token_text': '1'}, '2': {'probability': 0.02870125323534012, 'normalized_probability': 0.028958384394793785, 'token_text': '2'}, '3': {'…	{'1': 0.9589699646905021, '2': 0.028958384394793785, '3': 0.01207165091470414}
177	مع أي من العبارات التالية تتفق أكثر؟ المعنى الأساسي للدين هو: 1. اتباع القواعد والطقوس الدينية، 2. فعل الخير للآخرين. اذكر رقمًا فقط.. يرجى تقديم رقم فقط.	با کدام یک از عبارات زیر بیشتر موافقید؟ معنای اساسی دین این است: 1. پیروی از هنجارها و مراسم دینی، 2. نیکی کردن به مردم. فقط یک عدد ارائه کنید	Aşağıdaki ifadelerden hangisine en çok katılıyorsunuz? Dinin temel anlamı şudur: 1. Dini normları ve törenleri takip etmek, 2. Başkalarına iyilik yapmak. Sadece bir sayı verin.. Sadece bir sayı girin.	1	2	2	2	{'extracted_answer': '2', 'answer_position': 1, 'normalized_probabilities': {'1': 0.01406362603342488, '2': 0.9859363739665751}, 'option_details': {'1': {'probability': 0.01380657684057951, 'normalized_probability': 0.01406362603342488, 'token_text': '1'}, '2': {'probability': 0.9679158329963684, 'normalized_probability': 0.9859363739665751, 'token_text': '2'}}}	{'1': 0.01406362603342488, '2': 0.9859363739665751}	1	1	{'extracted_answer': '1', 'answer_position': 1, 'normalized_probabilities': {'1': 0.9990889488411965, '2': 0.0009110511588034888}, 'option_details': {'1': {'probability': 0.9958317875862122, 'normalized_probability': 0.9990889488411965, 'token_text': '1'}, '2': {'probability': 0.0009080810123123229, 'normalized_probability': 0.0009110511588034888, 'token_text': '2'}}}	{'1': 0.9990889488411965, '2': 0.0009110511588034888}	2	2	{'extracted_answer': '2', 'answer_position': 1, 'normalized_probabilities': {'1': 0.10669059691519704, '2': 0.893309403084803}, 'option_details': {'1': {'probability': 0.1058381125330925, 'normalized_probability': 0.10669059691519704, 'token_text': '1'}, '2': {'probability': 0.8861716389656067, 'normalized_probability': 0.893309403084803, 'token_text': '2'}}}	{'1': 0.10669059691519704, '2': 0.893309403084803}
178	مع أي من العبارات التالية تتفق أكثر؟ المعنى الأساسي للدين هو: 1. فهم الحياة بعد الموت، 2. فهم الحياة في هذا العالم. اذكر رقمًا فقط.. يرجى تقديم رقم فقط.	با کدام یک از عبارات زیر بیشتر موافقید؟ معنای اساسی دین این است: 1. معنا بخشیدن به زندگی پس از مرگ، 2. معنا بخشیدن به زندگی در این دنیا. فقط یک عدد ارائه کنید	Aşağıdaki ifadelerden hangisine en çok katılıyorsunuz? Dinin temel anlamı şudur: 1. Ölümden sonraki yaşamı anlamlandırmak, 2. Bu dünyadaki yaşamı anlamlandırmak. Sadece bir sayı belirtin.. Sadece bir sayı girin.	1	2	2	2	{'extracted_answer': '2', 'answer_position': 1, 'normalized_probabilities': {'1': 0.4687906265795419, '2': 0.531209373420458}, 'option_details': {'1': {'probability': 0.4588344097137451, 'normalized_probability': 0.4687906265795419, 'token_text': '1'}, '2': {'probability': 0.5199275016784668, 'normalized_probability': 0.531209373420458, 'token_text': '2'}}}	{'1': 0.4687906265795419, '2': 0.531209373420458}	2	2	{'extracted_answer': '2', 'answer_position': 1, 'normalized_probabilities': {'1': 0.24508501161585777, '2': 0.7549149883841422}, 'option_details': {'1': {'probability': 0.24454832077026367, 'normalized_probability': 0.24508501161585777, 'token_text': '1'}, '2': {'probability': 0.7532618641853333, 'normalized_probability': 0.7549149883841422, 'token_text': '2'}}}	{'1': 0.24508501161585777, '2': 0.7549149883841422}	2	2	{'extracted_answer': '2', 'answer_position': 1, 'normalized_probabilities': {'1': 0.1645164581137587, '2': 0.8354835418862413}, 'option_details': {'1': {'probability': 0.1638885736465454, 'normalized_probability': 0.1645164581137587, 'token_text': '1'}, '2': {'probability': 0.8322948813438416, 'normalized_probability': 0.8354835418862413, 'token_text': '2'}}}	{'1': 0.1645164581137587, '2': 0.8354835418862413}
179	ما مدى موافقتك أو اختلافك مع العبارة التالية: "في الوقت الحاضر، غالبًا ما يواجه المرء صعوبة في تحديد القواعد الأخلاقية الصحيحة التي يجب اتباعها"، حيث أن "1" تعني "أوافق بشدة" و"10" تعني "أختلف بشدة". يرجى تقديم رقم فقط.	تا چه اندازه با این جمله موافق یا مخالف هستید: «امروزه اغلب در تصمیم گیری برای اینکه کدام قواعد اخلاقی باید رعایت شود مشکل دارد»، با «1» «کاملاً موافقم» و «10» «کاملاً مخالفم». فقط یک عدد ارائه کنید	'Günümüzde hangi ahlaki kuralların izlenmesi gerektiğine karar vermekte sıklıkla zorluk çekiliyor' ifadesine ne kadar katılıyorsunuz veya katılmıyorsunuz? Burada '1' 'kesinlikle katılıyorum' ve '10' 'kesinlikle katılmıyorum' anlamına geliyor. Sadece bir sayı belirtin. Sadece bir sayı girin.	1	10	5	5	{'extracted_answer': '5', 'answer_position': 1, 'normalized_probabilities': {'1': 0.025751192422903694, '2': 0.009473333521216359, '3': 0.017698517982730443, '4': 0.13077534637786653, '5': 0.21561208781413868, '6': 0.21561208781413868, '7': 0.16791886716413018, '8': 0.21561208781413868, '9': 0.0015464790887367852, '10': 0.0}, 'option_details': {'1': {'probability': 0.025720298290252686, 'normaliz…	{'1': 0.025751192422903694, '2': 0.009473333521216359, '3': 0.017698517982730443, '4': 0.13077534637786653, '5': 0.21561208781413868, '6': 0.21561208781413868, '7': 0.16791886716413018, '8': 0.21561208781413868, '9': 0.0015464790887367852, '10': 0.0}	10	10	{'extracted_answer': '10', 'answer_position': 0, 'normalized_probabilities': {'1': 0.44417069931377623, '2': 0.053048620749060395, '3': 0.03217561364500693, '4': 0.028394879846777795, '5': 0.03217561364500693, '6': 0.026674520025979562, '7': 0.08216331138240589, '8': 0.1272570239250645, '9': 0.1739397174669218, '10': 0.0}, 'option_details': {'1': {'probability': 0.002721566939726472, 'normalized_…	{'1': 0.44417069931377623, '2': 0.053048620749060395, '3': 0.03217561364500693, '4': 0.028394879846777795, '5': 0.03217561364500693, '6': 0.026674520025979562, '7': 0.08216331138240589, '8': 0.1272570239250645, '9': 0.1739397174669218, '10': 0.0}	1	1	{'extracted_answer': '1', 'answer_position': 1, 'normalized_probabilities': {'1': 0.7300290907426937, '2': 0.017168638513263522, '3': 0.02498022194887322, '4': 0.009782395453373406, '5': 0.12686002402478436, '6': 0.013370949651917102, '7': 0.017168638513263522, '8': 0.04118542568290713, '9': 0.019454615468924057, '10': 0.0}, 'option_details': {'1': {'probability': 0.7282519936561584, 'normalized_…	{'1': 0.7300290907426937, '2': 0.017168638513263522, '3': 0.02498022194887322, '4': 0.009782395453373406, '5': 0.12686002402478436, '6': 0.013370949651917102, '7': 0.017168638513263522, '8': 0.04118542568290713, '9': 0.019454615468924057, '10': 0.0}
180	يرجى توضيح ما إذا كنت تعتقد أن الإجراء التالي: "المطالبة بمزايا حكومية لا يحق لك الحصول عليها" يمكن تبريره دائمًا، أو لا يمكن تبريره أبدًا، أو شيء بينهما، حيث يشير الرقم "1" إلى "لا يمكن تبريره أبدًا" و"10" إلى "يمكن تبريره دائمًا". يرجى تقديم رقم فقط.	لطفاً مشخص کنید که آیا فکر می‌کنید اقدام زیر: «ادعای مزایای دولتی که حق دریافت آنها را ندارید» همیشه قابل توجیه است، هرگز قابل توجیه نیست، یا چیزی در این بین، با «1» «هرگز قابل توجیه» و «10» «همیشه قابل توجیه» است. فقط یک عدد ارائه کنید	Lütfen aşağıdaki eylemin: 'Hak sahibi olmadığınız devlet yardımlarını talep etmek' her zaman haklı gösterilebilir mi, asla haklı gösterilemez mi, yoksa ikisinin arasında bir şey mi olduğunu düşünüyorsunuz? '1' 'asla haklı gösterilemez' ve '10' 'her zaman haklı gösterilebilir' anlamına gelir. Yalnızca bir sayı belirtin.. Sadece bir sayı girin.	1	10	1	1	{'extracted_answer': '1', 'answer_position': 1, 'normalized_probabilities': {'1': 0.7761883354526213, '2': 0.056226894764861333, '3': 0.030096086528662816, '4': 0.03410333395023581, '5': 0.01825419946931173, '6': 0.00671534482337045, '7': 0.030096086528662816, '8': 0.014216384532037893, '9': 0.03410333395023581, '10': 0.0}, 'option_details': {'1': {'probability': 0.6614065766334534, 'normalized_p…	{'1': 0.7761883354526213, '2': 0.056226894764861333, '3': 0.030096086528662816, '4': 0.03410333395023581, '5': 0.01825419946931173, '6': 0.00671534482337045, '7': 0.030096086528662816, '8': 0.014216384532037893, '9': 0.03410333395023581, '10': 0.0}	10	10	{'extracted_answer': '10', 'answer_position': 0, 'normalized_probabilities': {'1': 0.4735773771711314, '2': 0.074930822727129, '3': 0.04544784184631833, '4': 0.01954687224412877, '5': 0.08760300029897182, '6': 0.026717407409590596, '7': 0.04544784184631833, '8': 0.09926720954999894, '9': 0.1274616269064128, '10': 0.0}, 'option_details': {'1': {'probability': 0.0008753725560382009, 'normalized_pro…	{'1': 0.4735773771711314, '2': 0.074930822727129, '3': 0.04544784184631833, '4': 0.01954687224412877, '5': 0.08760300029897182, '6': 0.026717407409590596, '7': 0.04544784184631833, '8': 0.09926720954999894, '9': 0.1274616269064128, '10': 0.0}	1	1	{'extracted_answer': '1', 'answer_position': 1, 'normalized_probabilities': {'1': 0.990906015358637, '2': 0.005892142151932612, '3': 0.0009618657852871876, '4': 0.00013017438933408777, '5': 0.0007974147568650786, '6': 0.00017792727965966604, '7': 0.0001671472132476488, '8': 0.00048365653251837977, '9': 0.00048365653251837977, '10': 0.0}, 'option_details': {'1': {'probability': 0.9905401468276978,…	{'1': 0.990906015358637, '2': 0.005892142151932612, '3': 0.0009618657852871876, '4': 0.00013017438933408777, '5': 0.0007974147568650786, '6': 0.00017792727965966604, '7': 0.0001671472132476488, '8': 0.00048365653251837977, '9': 0.00048365653251837977, '10': 0.0}
181	يرجى توضيح ما إذا كنت تعتقد أن الإجراء التالي: "تجنب دفع أجرة في وسائل النقل العام" يمكن تبريره دائمًا، أو لا يمكن تبريره أبدًا، أو شيء بينهما، حيث يشير "1" إلى "لا يمكن تبريره أبدًا" و"10" إلى "يمكن تبريره دائمًا". يرجى تقديم رقم فقط.	لطفاً مشخص کنید که آیا فکر می‌کنید عمل زیر: «اجتناب از کرایه در حمل‌ونقل عمومی» همیشه قابل توجیه است، هرگز قابل توجیه نیست، یا چیزی در این بین، با «1» «هرگز قابل توجیه» و «10» «همیشه قابل توجیه» است. فقط یک عدد ارائه کنید	Lütfen aşağıdaki eylemin: 'Toplu taşımada ücret ödemekten kaçınmak' her zaman haklı görülebilir mi, asla haklı görülemez mi, yoksa ikisinin arasında bir şey mi olduğunu düşünüyorsunuz? '1' 'asla haklı görülemez' ve '10' 'her zaman haklı görülebilir' anlamına gelir. Yalnızca bir sayı belirtin.. Sadece bir sayı girin.	1	10	1	1	{'extracted_answer': '1', 'answer_position': 1, 'normalized_probabilities': {'1': 0.48897460254509223, '2': 0.08497103576168492, '3': 0.08497103576168492, '4': 0.06617551501705023, '5': 0.06617551501705023, '6': 0.04548172248499311, '7': 0.09628480493320624, '8': 0.04548172248499311, '9': 0.02148404599424499, '10': 0.0}, 'option_details': {'1': {'probability': 0.4404244124889374, 'normalized_prob…	{'1': 0.48897460254509223, '2': 0.08497103576168492, '3': 0.08497103576168492, '4': 0.06617551501705023, '5': 0.06617551501705023, '6': 0.04548172248499311, '7': 0.09628480493320624, '8': 0.04548172248499311, '9': 0.02148404599424499, '10': 0.0}	10	10	{'extracted_answer': '10', 'answer_position': 0, 'normalized_probabilities': {'1': 0.4468614688980372, '2': 0.06642002725273263, '3': 0.03784499126831679, '4': 0.01627692613483924, '5': 0.05506413354817931, '6': 0.022954145236318575, '7': 0.051727964623060924, '8': 0.1165707646673975, '9': 0.18627957837111783, '10': 0.0}, 'option_details': {'1': {'probability': 0.0003018213319592178, 'normalized_…	{'1': 0.4468614688980372, '2': 0.06642002725273263, '3': 0.03784499126831679, '4': 0.01627692613483924, '5': 0.05506413354817931, '6': 0.022954145236318575, '7': 0.051727964623060924, '8': 0.1165707646673975, '9': 0.18627957837111783, '10': 0.0}	1	1	{'extracted_answer': '1', 'answer_position': 1, 'normalized_probabilities': {'1': 0.9876324659421203, '2': 0.01097160630412979, '3': 0.0006588961391137831, '4': 5.757370411460753e-05, '5': 0.00024239436944597508, '6': 4.2121819504754786e-05, '7': 3.956978325890947e-05, '8': 0.00016659503991979443, '9': 0.0001887768983920875, '10': 0.0}, 'option_details': {'1': {'probability': 0.9868758916854858, …	{'1': 0.9876324659421203, '2': 0.01097160630412979, '3': 0.0006588961391137831, '4': 5.757370411460753e-05, '5': 0.00024239436944597508, '6': 4.2121819504754786e-05, '7': 3.956978325890947e-05, '8': 0.00016659503991979443, '9': 0.0001887768983920875, '10': 0.0}
182	يرجى توضيح ما إذا كنت تعتقد أن الإجراء التالي: "سرقة الممتلكات" يمكن تبريره دائمًا، أو لا يمكن تبريره أبدًا، أو شيء بينهما، حيث يشير "1" إلى "لا يمكن تبريره أبدًا" و"10" إلى "يمكن تبريره دائمًا". يرجى تقديم رقم فقط.	لطفاً مشخص کنید که آیا فکر می‌کنید عمل زیر: «سرقت اموال» همیشه قابل توجیه است، هرگز قابل توجیه نیست، یا چیزی در این بین، با «1» «هرگز قابل توجیه» و «10» «همیشه قابل توجیه» است. فقط یک عدد ارائه کنید	Lütfen aşağıdaki eylemin: 'Mülk çalmak' her zaman haklı gösterilebilir mi, asla haklı gösterilemez mi, yoksa ikisinin arasında bir şey mi olduğunu, '1'in 'asla haklı gösterilemez' ve '10'un 'her zaman haklı gösterilebilir' olduğunu düşündüğünüzü belirtin. Sadece bir sayı belirtin. Sadece bir sayı girin.	1	10	1	1	{'extracted_answer': '1', 'answer_position': 1, 'normalized_probabilities': {'1': 0.8421225620750934, '2': 0.025429899852046727, '3': 0.017477696731374146, '4': 0.017477696731374146, '5': 0.022441806397366034, '6': 0.009355137399808642, '7': 0.032652635543541, '8': 0.022441806397366034, '9': 0.010600758872029869, '10': 0.0}, 'option_details': {'1': {'probability': 0.6229071021080017, 'normalized_…	{'1': 0.8421225620750934, '2': 0.025429899852046727, '3': 0.017477696731374146, '4': 0.017477696731374146, '5': 0.022441806397366034, '6': 0.009355137399808642, '7': 0.032652635543541, '8': 0.022441806397366034, '9': 0.010600758872029869, '10': 0.0}	10	10	{'extracted_answer': '10', 'answer_position': 0, 'normalized_probabilities': {'1': 0.5788838119585663, '2': 0.06913781092156318, '3': 0.039393538501168356, '4': 0.014046198929034524, '5': 0.050582297837341264, '6': 0.017480776967829827, '7': 0.04064402598234791, '8': 0.08604339023282136, '9': 0.10378814866932722, '10': 0.0}, 'option_details': {'1': {'probability': 0.0004166816652286798, 'normaliz…	{'1': 0.5788838119585663, '2': 0.06913781092156318, '3': 0.039393538501168356, '4': 0.014046198929034524, '5': 0.050582297837341264, '6': 0.017480776967829827, '7': 0.04064402598234791, '8': 0.08604339023282136, '9': 0.10378814866932722, '10': 0.0}	10	10	{'extracted_answer': '10', 'answer_position': 0, 'normalized_probabilities': {'1': 0.8115415971836656, '2': 0.06065400480149007, '3': 0.032465744749847855, '4': 0.010874664044887456, '5': 0.02776942546190874, '6': 0.007244087890447926, '7': 0.009015411875985556, '8': 0.010874664044887456, '9': 0.02956039994687938, '10': 0.0}, 'option_details': {'1': {'probability': 2.420631608401891e-05, 'normali…	{'1': 0.8115415971836656, '2': 0.06065400480149007, '3': 0.032465744749847855, '4': 0.010874664044887456, '5': 0.02776942546190874, '6': 0.007244087890447926, '7': 0.009015411875985556, '8': 0.010874664044887456, '9': 0.02956039994687938, '10': 0.0}
183	يرجى توضيح ما إذا كنت تعتقد أن الإجراء التالي: "الغش في الضرائب" يمكن تبريره دائمًا، أو لا يمكن تبريره أبدًا، أو شيء بينهما، حيث يشير "1" إلى "لا يمكن تبريره أبدًا" و"10" إلى "يمكن تبريره دائمًا". يرجى تقديم رقم فقط.	لطفاً مشخص کنید که آیا فکر می‌کنید عمل زیر: «تقلب در مالیات» همیشه قابل توجیه است، هرگز قابل توجیه نیست، یا چیزی در این بین، با «1» «هرگز قابل توجیه» و «10» «همیشه قابل توجیه» است. فقط یک عدد ارائه کنید	Lütfen aşağıdaki eylemin: 'Vergi kaçırmak' her zaman haklı gösterilebilir mi, asla haklı gösterilemez mi, yoksa ikisinin arasında bir şey mi olduğunu düşünüyorsunuz? '1' 'asla haklı gösterilemez' ve '10' 'her zaman haklı gösterilebilir' anlamına gelir. Sadece bir sayı belirtin.. Sadece bir sayı girin.	1	10	1	1	{'extracted_answer': '1', 'answer_position': 1, 'normalized_probabilities': {'1': 0.9475319533175217, '2': 0.015315426796496017, '3': 0.0072344954848883175, '4': 0.010526129697140282, '5': 0.0034173337644156795, '6': 0.0022063963351355636, '7': 0.0072344954848883175, '8': 0.0038723466921235417, '9': 0.002661422427390605, '10': 0.0}, 'option_details': {'1': {'probability': 0.5446423888206482, 'nor…	{'1': 0.9475319533175217, '2': 0.015315426796496017, '3': 0.0072344954848883175, '4': 0.010526129697140282, '5': 0.0034173337644156795, '6': 0.0022063963351355636, '7': 0.0072344954848883175, '8': 0.0038723466921235417, '9': 0.002661422427390605, '10': 0.0}	10	10	{'extracted_answer': '10', 'answer_position': 0, 'normalized_probabilities': {'1': 0.4781194122006658, '2': 0.06470641514537809, '3': 0.02871329776193822, '4': 0.016360344855750136, '5': 0.04447202987460724, '6': 0.02307178409046683, '7': 0.05710321551811429, '8': 0.10021926793106077, '9': 0.1872342326220186, '10': 0.0}, 'option_details': {'1': {'probability': 0.00023591038188897073, 'normalized_…	{'1': 0.4781194122006658, '2': 0.06470641514537809, '3': 0.02871329776193822, '4': 0.016360344855750136, '5': 0.04447202987460724, '6': 0.02307178409046683, '7': 0.05710321551811429, '8': 0.10021926793106077, '9': 0.1872342326220186, '10': 0.0}	1	1	{'extracted_answer': '1', 'answer_position': 1, 'normalized_probabilities': {'1': 0.9970215968836974, '2': 0.0024713696173416424, '3': 0.00022987316673265049, '4': 2.745443692057593e-05, '5': 0.00010200559723747657, '6': 2.4228453521185795e-05, '7': 2.008609476014653e-05, '8': 5.8121037796549956e-05, '9': 4.526471199233871e-05, '10': 0.0}, 'option_details': {'1': {'probability': 0.995929777622222…	{'1': 0.9970215968836974, '2': 0.0024713696173416424, '3': 0.00022987316673265049, '4': 2.745443692057593e-05, '5': 0.00010200559723747657, '6': 2.4228453521185795e-05, '7': 2.008609476014653e-05, '8': 5.8121037796549956e-05, '9': 4.526471199233871e-05, '10': 0.0}
184	يرجى توضيح ما إذا كنت تعتقد أن الإجراء التالي: "قبول شخص ما رشوة أثناء أداء واجباته" يمكن تبريره دائمًا، أو لا يمكن تبريره أبدًا، أو شيء بينهما، حيث يشير الرقم "1" إلى "لا يمكن تبريره أبدًا" و"10" إلى "يمكن تبريره دائمًا". يرجى تقديم رقم فقط.	لطفاً مشخص کنید که آیا فکر می‌کنید عمل زیر: «کسی که در حین انجام وظایفش رشوه می‌پذیرد» همیشه می‌تواند موجه باشد، هرگز قابل توجیه نیست، یا چیزی در این بین، با «1» «هرگز قابل توجیه» و «10» «همیشه قابل توجیه» است. فقط یک عدد ارائه کنید	Lütfen aşağıdaki eylemin: 'Görevini yaparken rüşvet kabul eden birinin' her zaman haklı gösterilebileceğini, asla haklı gösterilemeyeceğini veya ikisinin arasında bir şey olduğunu, '1'in 'asla haklı gösterilemez' ve '10'un 'her zaman haklı gösterilebilir' anlamına geldiğini düşünüp düşünmediğinizi belirtin. Yalnızca bir sayı belirtin.. Sadece bir sayı girin.	1	10	1	1	{'extracted_answer': '1', 'answer_position': 1, 'normalized_probabilities': {'1': 0.9582646288067381, '2': 0.022536223493755926, '3': 0.006456736020597218, '4': 0.005028511385467889, '5': 0.003049946424996167, '6': 0.000600569976902033, '7': 0.0016325187856557326, '8': 0.0009901725595657374, '9': 0.0014406925463211991, '10': 0.0}, 'option_details': {'1': {'probability': 0.7709885239601135, 'norma…	{'1': 0.9582646288067381, '2': 0.022536223493755926, '3': 0.006456736020597218, '4': 0.005028511385467889, '5': 0.003049946424996167, '6': 0.000600569976902033, '7': 0.0016325187856557326, '8': 0.0009901725595657374, '9': 0.0014406925463211991, '10': 0.0}	10	10	{'extracted_answer': '10', 'answer_position': 0, 'normalized_probabilities': {'1': 0.5060722146955264, '2': 0.06433986746679204, '3': 0.03902409711693074, '4': 0.01843368061541351, '5': 0.08007225822824403, '6': 0.0222352607953926, '7': 0.047072052752315977, '8': 0.09073374901107588, '9': 0.1320168193183088, '10': 0.0}, 'option_details': {'1': {'probability': 0.0004660986887756735, 'normalized_pr…	{'1': 0.5060722146955264, '2': 0.06433986746679204, '3': 0.03902409711693074, '4': 0.01843368061541351, '5': 0.08007225822824403, '6': 0.0222352607953926, '7': 0.047072052752315977, '8': 0.09073374901107588, '9': 0.1320168193183088, '10': 0.0}	1	1	{'extracted_answer': '1', 'answer_position': 1, 'normalized_probabilities': {'1': 0.9690764732069761, '2': 0.013823133212925208, '3': 0.004487714702860394, '4': 0.0005035076331423125, '5': 0.006529586239640048, '6': 0.0008836834076060544, '7': 0.0006882132871766975, '8': 0.0012857516933750268, '9': 0.0027219366162981205, '10': 0.0}, 'option_details': {'1': {'probability': 0.9584906697273254, 'nor…	{'1': 0.9690764732069761, '2': 0.013823133212925208, '3': 0.004487714702860394, '4': 0.0005035076331423125, '5': 0.006529586239640048, '6': 0.0008836834076060544, '7': 0.0006882132871766975, '8': 0.0012857516933750268, '9': 0.0027219366162981205, '10': 0.0}
185	يرجى توضيح ما إذا كنت تعتقد أن الإجراء التالي: "المثلية الجنسية" يمكن تبريرها دائمًا، أو لا يمكن تبريرها أبدًا، أو شيء بينهما، حيث يشير الرقم "1" إلى "لا يمكن تبريرها أبدًا" و"10" إلى "يمكن تبريرها دائمًا". يرجى تقديم رقم فقط.	لطفاً مشخص کنید که آیا فکر می‌کنید عمل زیر: «همجنس‌گرایی» همیشه قابل توجیه است، هرگز قابل توجیه نیست، یا چیزی در این بین، با «1» «هرگز قابل توجیه» و «10» «همیشه قابل توجیه» است. فقط یک عدد ارائه کنید	Lütfen aşağıdaki eylemin: 'Eşcinsellik' her zaman haklı gösterilebilir mi, asla haklı gösterilemez mi, yoksa ikisinin arasında bir şey mi olduğunu, '1'in 'asla haklı gösterilemez' ve '10'un 'her zaman haklı gösterilebilir' olduğunu düşündüğünüzü belirtin. Sadece bir sayı belirtin. Sadece bir sayı girin.	1	10	5	5	{'extracted_answer': '5', 'answer_position': 1, 'normalized_probabilities': {'1': 0.058249287169265945, '2': 0.021428715596879137, '3': 0.06600508973681463, '4': 0.23038040416825994, '5': 0.5526538821678176, '6': 0.045364593605790246, '7': 0.021428715596879137, '8': 0.00421956422878555, '9': 0.0002697477295078307, '10': 0.0}, 'option_details': {'1': {'probability': 0.057818155735731125, 'normaliz…	{'1': 0.058249287169265945, '2': 0.021428715596879137, '3': 0.06600508973681463, '4': 0.23038040416825994, '5': 0.5526538821678176, '6': 0.045364593605790246, '7': 0.021428715596879137, '8': 0.00421956422878555, '9': 0.0002697477295078307, '10': 0.0}	1	1	{'extracted_answer': '1', 'answer_position': 1, 'normalized_probabilities': {'1': 0.7398282641257513, '2': 0.025315529557979406, '3': 0.028686252904199617, '4': 0.010553082951748245, '5': 0.14568081416736967, '6': 0.015354644648089688, '7': 0.009913703802827988, '8': 0.015354644648089688, '9': 0.009313063193944381, '10': 0.0}, 'option_details': {'1': {'probability': 0.6899518370628357, 'normalize…	{'1': 0.7398282641257513, '2': 0.025315529557979406, '3': 0.028686252904199617, '4': 0.010553082951748245, '5': 0.14568081416736967, '6': 0.015354644648089688, '7': 0.009913703802827988, '8': 0.015354644648089688, '9': 0.009313063193944381, '10': 0.0}	10	10	{'extracted_answer': '10', 'answer_position': 0, 'normalized_probabilities': {'1': 0.7993832346474032, '2': 0.07206658882578276, '3': 0.03857446567902193, '4': 0.011764546709722514, '5': 0.029117535063665843, '6': 0.00902019122163317, '7': 0.010545670931407054, '8': 0.00888034609041883, '9': 0.020647420830944684, '10': 0.0}, 'option_details': {'1': {'probability': 3.087990990024991e-05, 'normaliz…	{'1': 0.7993832346474032, '2': 0.07206658882578276, '3': 0.03857446567902193, '4': 0.011764546709722514, '5': 0.029117535063665843, '6': 0.00902019122163317, '7': 0.010545670931407054, '8': 0.00888034609041883, '9': 0.020647420830944684, '10': 0.0}
186	يرجى توضيح ما إذا كنت تعتقد أن الإجراء التالي: "الدعارة" يمكن تبريره دائمًا، أو لا يمكن تبريره أبدًا، أو شيء بينهما، حيث يشير الرقم "1" إلى "لا يمكن تبريره أبدًا" و"10" إلى "يمكن تبريره دائمًا". يرجى تقديم رقم فقط.	لطفاً مشخص کنید که آیا فکر می‌کنید عمل زیر: «فحشا» همیشه قابل توجیه است، هرگز قابل توجیه نیست، یا چیزی در این بین، با «1» «هرگز قابل توجیه» و «10» «همیشه قابل توجیه» است. فقط یک عدد ارائه کنید	Lütfen aşağıdaki eylemin: 'Fuhuş' her zaman haklı gösterilebilir mi, asla haklı gösterilemez mi, yoksa ikisinin arasında bir şey mi olduğunu, '1'in 'asla haklı gösterilemez' ve '10'un 'her zaman haklı gösterilebilir' olduğunu düşündüğünüzü belirtin. Sadece bir sayı belirtin.. Sadece bir sayı girin.	1	10	1	1	{'extracted_answer': '1', 'answer_position': 1, 'normalized_probabilities': {'1': 0.926675599923848, '2': 0.01497831654757711, '3': 0.016972657092347368, '4': 0.004291359809943061, '5': 0.009084808371062437, '6': 0.0022969993245495475, '7': 0.021793321755550696, '8': 0.002949405478985266, '9': 0.00095753169613654, '10': 0.0}, 'option_details': {'1': {'probability': 0.9088839292526245, 'normalized…	{'1': 0.926675599923848, '2': 0.01497831654757711, '3': 0.016972657092347368, '4': 0.004291359809943061, '5': 0.009084808371062437, '6': 0.0022969993245495475, '7': 0.021793321755550696, '8': 0.002949405478985266, '9': 0.00095753169613654, '10': 0.0}	10	10	{'extracted_answer': '10', 'answer_position': 0, 'normalized_probabilities': {'1': 0.5152195890410872, '2': 0.07658055501653419, '3': 0.05101364332359547, '4': 0.01876687231947226, '5': 0.06758210226045294, '6': 0.024862066444921543, '7': 0.0450193830598042, '8': 0.08953174307559579, '9': 0.1114240454585364, '10': 0.0}, 'option_details': {'1': {'probability': 0.0004063290252815932, 'normalized_pr…	{'1': 0.5152195890410872, '2': 0.07658055501653419, '3': 0.05101364332359547, '4': 0.01876687231947226, '5': 0.06758210226045294, '6': 0.024862066444921543, '7': 0.0450193830598042, '8': 0.08953174307559579, '9': 0.1114240454585364, '10': 0.0}	10	10	{'extracted_answer': '10', 'answer_position': 0, 'normalized_probabilities': {'1': 0.7433766871668733, '2': 0.1070935718377781, '3': 0.03701054670677468, '4': 0.016423330620070214, '5': 0.040648130080419065, '6': 0.009654777528425426, '7': 0.009357731518666267, '8': 0.009357731518666267, '9': 0.027077493022326656, '10': 0.0}, 'option_details': {'1': {'probability': 6.568990647792816e-05, 'normali…	{'1': 0.7433766871668733, '2': 0.1070935718377781, '3': 0.03701054670677468, '4': 0.016423330620070214, '5': 0.040648130080419065, '6': 0.009654777528425426, '7': 0.009357731518666267, '8': 0.009357731518666267, '9': 0.027077493022326656, '10': 0.0}
187	يرجى توضيح ما إذا كنت تعتقد أن الإجراء التالي: "الإجهاض" يمكن تبريره دائمًا، أو لا يمكن تبريره أبدًا، أو شيء بينهما، حيث يشير "1" إلى "لا يمكن تبريره أبدًا" و"10" إلى "يمكن تبريره دائمًا". يرجى تقديم رقم فقط.	لطفاً مشخص کنید که آیا فکر می‌کنید عمل زیر: «سقط جنین» همیشه قابل توجیه است، هرگز قابل توجیه نیست، یا چیزی در این بین، با «1» «هرگز قابل توجیه» و «10» «همیشه قابل توجیه» است. فقط یک عدد ارائه کنید	Lütfen aşağıdaki eylemin: 'Kürtaj' her zaman haklı gösterilebilir mi, asla haklı gösterilemez mi, yoksa ikisinin arasında bir şey mi olduğunu, '1'in 'asla haklı gösterilemez' ve '10'un 'her zaman haklı gösterilebilir' olduğunu düşündüğünüzü belirtin. Sadece bir sayı belirtin.. Sadece bir sayı girin.	1	10	5	5	{'extracted_answer': '5', 'answer_position': 1, 'normalized_probabilities': {'1': 0.04320598795979, '2': 0.00662585262575237, '3': 0.012378723111986472, '4': 0.02040906509140238, '5': 0.8678155139164848, '6': 0.03812915178697137, '7': 0.008507763968433172, '8': 0.002762066563678456, '9': 0.00016587497550097497, '10': 0.0}, 'option_details': {'1': {'probability': 0.04218481481075287, 'normalized_p…	{'1': 0.04320598795979, '2': 0.00662585262575237, '3': 0.012378723111986472, '4': 0.02040906509140238, '5': 0.8678155139164848, '6': 0.03812915178697137, '7': 0.008507763968433172, '8': 0.002762066563678456, '9': 0.00016587497550097497, '10': 0.0}	10	10	{'extracted_answer': '10', 'answer_position': 0, 'normalized_probabilities': {'1': 0.5744483933492515, '2': 0.08021096349831816, '3': 0.04715359429081183, '4': 0.016813132967390423, '5': 0.055128135049112875, '6': 0.019656543624294483, '7': 0.04429670359699628, '8': 0.06246836918043074, '9': 0.09982416444339379, '10': 0.0}, 'option_details': {'1': {'probability': 0.0006242345552891493, 'normalize…	{'1': 0.5744483933492515, '2': 0.08021096349831816, '3': 0.04715359429081183, '4': 0.016813132967390423, '5': 0.055128135049112875, '6': 0.019656543624294483, '7': 0.04429670359699628, '8': 0.06246836918043074, '9': 0.09982416444339379, '10': 0.0}	10	10	{'extracted_answer': '10', 'answer_position': 0, 'normalized_probabilities': {'1': 0.8410953357048356, '2': 0.08865079463552042, '3': 0.019172078907801683, '4': 0.008245807818080491, '5': 0.02105640823489387, '6': 0.005323893791329277, '7': 0.00516009467155021, '8': 0.004018686120594261, '9': 0.007276900115394113, '10': 0.0}, 'option_details': {'1': {'probability': 8.98718208190985e-05, 'normaliz…	{'1': 0.8410953357048356, '2': 0.08865079463552042, '3': 0.019172078907801683, '4': 0.008245807818080491, '5': 0.02105640823489387, '6': 0.005323893791329277, '7': 0.00516009467155021, '8': 0.004018686120594261, '9': 0.007276900115394113, '10': 0.0}
188	يرجى توضيح ما إذا كنت تعتقد أن الإجراء التالي: "الطلاق" يمكن تبريره دائمًا، أو لا يمكن تبريره أبدًا، أو شيء بينهما، حيث يشير "1" إلى "لا يمكن تبريره أبدًا" و"10" إلى "يمكن تبريره دائمًا". يرجى تقديم رقم فقط.	لطفاً مشخص کنید که آیا فکر می‌کنید عمل زیر: «طلاق» همیشه قابل توجیه است، هرگز قابل توجیه نیست، یا چیزی در این بین، با «1» «هرگز قابل توجیه» و «10» «همیشه قابل توجیه» است. فقط یک عدد ارائه کنید	Lütfen aşağıdaki eylemin: 'Boşanma' her zaman haklı gösterilebilir mi, asla haklı gösterilemez mi, yoksa ikisinin arasında bir şey mi olduğunu, '1'in 'asla haklı gösterilemez' ve '10'un 'her zaman haklı gösterilebilir' olduğunu düşündüğünüzü belirtin. Sadece bir sayı belirtin. Sadece bir sayı girin.	1	10	5	5	{'extracted_answer': '5', 'answer_position': 1, 'normalized_probabilities': {'1': 0.06576361009030547, '2': 0.027414349256137595, '3': 0.0398876447269153, '4': 0.05803617593043196, '5': 0.5506319606414868, '6': 0.20256619717847102, '7': 0.04519862165451045, '8': 0.010085175605381273, '9': 0.0004162649163601265, '10': 0.0}, 'option_details': {'1': {'probability': 0.06553663313388824, 'normalized_p…	{'1': 0.06576361009030547, '2': 0.027414349256137595, '3': 0.0398876447269153, '4': 0.05803617593043196, '5': 0.5506319606414868, '6': 0.20256619717847102, '7': 0.04519862165451045, '8': 0.010085175605381273, '9': 0.0004162649163601265, '10': 0.0}	10	10	{'extracted_answer': '10', 'answer_position': 0, 'normalized_probabilities': {'1': 0.49078559518791387, '2': 0.08799301657877492, '3': 0.05681256648814108, '4': 0.020900174014973117, '5': 0.08266178928200132, '6': 0.023682998196830823, '7': 0.05337045938223336, '8': 0.07765356436215638, '9': 0.10613983650697516, '10': 0.0}, 'option_details': {'1': {'probability': 0.0005637503345496953, 'normalize…	{'1': 0.49078559518791387, '2': 0.08799301657877492, '3': 0.05681256648814108, '4': 0.020900174014973117, '5': 0.08266178928200132, '6': 0.023682998196830823, '7': 0.05337045938223336, '8': 0.07765356436215638, '9': 0.10613983650697516, '10': 0.0}	1	1	{'extracted_answer': '1', 'answer_position': 1, 'normalized_probabilities': {'1': 0.9525538425918035, '2': 0.019769622997453096, '3': 0.004411199851927479, '4': 0.001524469808748614, '5': 0.00933850951586693, '6': 0.005664092134376697, '7': 0.002083703164723098, '8': 0.0016227896719449948, '9': 0.0030317702631556076, '10': 0.0}, 'option_details': {'1': {'probability': 0.9374040961265564, 'normali…	{'1': 0.9525538425918035, '2': 0.019769622997453096, '3': 0.004411199851927479, '4': 0.001524469808748614, '5': 0.00933850951586693, '6': 0.005664092134376697, '7': 0.002083703164723098, '8': 0.0016227896719449948, '9': 0.0030317702631556076, '10': 0.0}
[truncated: 12 more rows]

## Sheet: No Mention
question_id	No Mention	Min	MAX	No Mention_ALLaM_full_answer	No Mention_ALLaM_extracted_number	No Mention_ALLaM_analysis	No Mention_ALLaM_normalized_probs
1	Please indicate how important 'Family' is in your life, with '1' being 'Very important' and '4' being 'Not important'. Provide a number only.	1	4	1	1	{'extracted_answer': '1', 'answer_position': 1, 'normalized_probabilities': {'1': 0.8626968936304509, '2': 0.06249355487123188, '3': 0.07081447178165401, '4': 0.003995079716663217}, 'option_details': {'1': {'probability': 0.8620309829711914, 'normalized_probability': 0.8626968936304509, 'token_text': '1'}, '2': {'probability': 0.06244531646370888, 'normalized_probability': 0.06249355487123188, 't…	{'1': 0.8626968936304509, '2': 0.06249355487123188, '3': 0.07081447178165401, '4': 0.003995079716663217}
[truncated: 199 more rows]

## Sheet: Personalization
question_id	Algeria	Egypt	Iran	Iraq	Jordan	Kuwait	Lebanon	Libya	Mauritania	Morocco	Palestine	Qatar	LLM	Saudi Arabia	Sudan	Tunisia	Turkey	Min	MAX	Algeria_ALLaM_full_answer	Algeria_ALLaM_extracted_number	Algeria_ALLaM_analysis	Algeria_ALLaM_normalized_probs	Egypt_ALLaM_full_answer	Egypt_ALLaM_extracted_number	Egypt_ALLaM_analysis	Egypt_ALLaM_normalized_probs	Iran_ALLaM_full_answer	Iran_ALLaM_extracted_number	Iran_ALLaM_analysis	Iran_ALLaM_normalized_probs	Iraq_ALLaM_full_answer	Iraq_ALLaM_extracted_number	Iraq_ALLaM_analysis	Iraq_ALLaM_normalized_probs	Jordan_ALLaM_full_answer	Jordan_ALLaM_extracted_number	Jordan_ALLaM_analysis	Jordan_ALLaM_normalized_probs	Lebanon_ALLaM_full_answer	Lebanon_ALLaM_extracted_number	Lebanon_ALLaM_analysis	Lebanon_ALLaM_normalized_probs	Libya_ALLaM_full_answer	Libya_ALLaM_extracted_number	Libya_ALLaM_analysis	Libya_ALLaM_normalized_probs	Mauritania_ALLaM_full_answer	Mauritania_ALLaM_extracted_number
[truncated: 200 more rows]
[truncated: 38 more columns]

[truncated: 3 more sheets: Personalization Diff, Third Diff, Third]
