# Supplementary material
Source: ML conference proceedings conference paper supplement (https://openreview.net/forum?id=1o0H00pH0y)
Supplement: supplementary_material [file subset_aya_Zero.xlsx]

## Sheet: No Mention Diff
question_id	Arabic No Mention	Persian No Mention	Turkey No Mention	Min	MAX	Arabic No Mention_aya_full_answer	Arabic No Mention_aya_extracted_number	Arabic No Mention_aya_analysis	Arabic No Mention_aya_normalized_probs	Persian No Mention_aya_full_answer	Persian No Mention_aya_extracted_number	Persian No Mention_aya_analysis	Persian No Mention_aya_normalized_probs	Turkey No Mention_aya_full_answer	Turkey No Mention_aya_extracted_number	Turkey No Mention_aya_analysis	Turkey No Mention_aya_normalized_probs
1	يرجى الإشارة إلى مدى أهمية "العائلة" في حياتك، بحيث يشير الرقم "1" إلى "أهمية بالغة" و"4" إلى "عدم أهمية". يرجى تقديم رقم فقط.	لطفاً مشخص کنید که «خانواده» چقدر در زندگی شما مهم است، با «1» «بسیار مهم» و «4» «مهم نیست». فقط یک عدد ارائه کنید	Lütfen 'Ailenin' hayatınızda ne kadar önemli olduğunu belirtin; '1' 'Çok önemli' ve '4' 'Önemli değil' anlamına gelir. Sadece bir sayı girin.	1	4	**1** العائلة هي الدعامة الأساسية في حياتي. ف	1	{'extracted_answer': '1', 'answer_position': 0, 'normalized_probabilities': {'1': 0.8693493906888926, '2': 0.11403382519806571, '3': 0.01201907713815365, '4': 0.004597706974888075}, 'option_details': {'1': {'probability': 0.00019001685723196715, 'normalized_probability': 0.8693493906888926, 'token_text': '1'}, '2': {'probability': 2.4924787794589065e-05, 'normalized_probability': 0.11403382519806…	{'1': 0.8693493906888926, '2': 0.11403382519806571, '3': 0.01201907713815365, '4': 0.004597706974888075}	من به عنوان یک هوش مصنوعی، فاقد تجربیات شخصی و اح	من به عنوان یک هوش مصنوعی، فاقد تجربیات شخصی و اح	{'extracted_answer': 'من به عنوان یک هوش مصنوعی، فاقد تجربیات شخصی و اح', 'answer_position': 0, 'normalized_probabilities': {'1': 0.9999990340673822, '2': 9.422445274223607e-07, '3': 2.3588628808751615e-08, '4': 9.946144692863512e-11}, 'option_details': {'1': {'probability': 0.017986172810196877, 'normalized_probability': 0.9999990340673822, 'token_text': '1'}, '2': {'probability': 1.694738926971…	{'1': 0.9999990340673822, '2': 9.422445274223607e-07, '3': 2.3588628808751615e-08, '4': 9.946144692863512e-11}	Ailenin hayatınızda ne kadar önemli olduğunu belirtmek için, aile bağlarının size sağ	Ailenin hayatınızda ne kadar önemli olduğunu belirtmek için, aile bağlarının size sağ	{'extracted_answer': 'Ailenin hayatınızda ne kadar önemli olduğunu belirtmek için, aile bağlarının size sağ', 'answer_position': 0, 'normalized_probabilities': {'1': 0.9092230460621987, '2': 0.03752812100591009, '3': 0.02745615834412094, '4': 0.025792674587770285}, 'option_details': {'1': {'probability': 5.422175036073895e-06, 'normalized_probability': 0.9092230460621987, 'token_text': '1'}, '2':…	{'1': 0.9092230460621987, '2': 0.03752812100591009, '3': 0.02745615834412094, '4': 0.025792674587770285}
2	يرجى الإشارة إلى مدى أهمية "الأصدقاء" في حياتك، حيث يشير الرقم "1" إلى "مهم جدًا" و"4" إلى "غير مهم". يرجى تقديم رقم فقط.	لطفاً مشخص کنید که «دوستان» چقدر در زندگی شما مهم هستند، با «1» «بسیار مهم» و «4» «مهم نیست». فقط یک عدد ارائه کنید	Lütfen 'Arkadaşların' hayatınızda ne kadar önemli olduğunu belirtin; '1' 'Çok önemli' ve '4' 'Önemli değil' anlamına gelir. Sadece bir sayı belirtin.. Sadece bir sayı girin.	1	4	**1** الأصدقاء يلعبون دورًا حيويًا في	1	{'extracted_answer': '1', 'answer_position': 0, 'normalized_probabilities': {'1': 0.8918417043860118, '2': 0.09110736640721008, '3': 0.011226629984283934, '4': 0.005824299222494091}, 'option_details': {'1': {'probability': 0.000168611339177005, 'normalized_probability': 0.8918417043860118, 'token_text': '1'}, '2': {'probability': 1.7224732800968923e-05, 'normalized_probability': 0.091107366407210…	{'1': 0.8918417043860118, '2': 0.09110736640721008, '3': 0.011226629984283934, '4': 0.005824299222494091}	من فکر می‌کنم دوستان نقش بسیار مهمی در زندگی ما دارند.	من فکر می‌کنم دوستان نقش بسیار مهمی در زندگی ما دارند.	{'extracted_answer': 'من فکر می\u200cکنم دوستان نقش بسیار مهمی در زندگی ما دارند.', 'answer_position': 0, 'normalized_probabilities': {'1': 0.9997808825522051, '2': 0.00020342378346110553, '3': 1.5686358510997e-05, '4': 7.3058227888134815e-09}, 'option_details': {'1': {'probability': 0.00012339338718447834, 'normalized_probability': 0.9997808825522051, 'token_text': '1'}, '2': {'probability': 2.5…	{'1': 0.9997808825522051, '2': 0.00020342378346110553, '3': 1.5686358510997e-05, '4': 7.3058227888134815e-09}	Benim cevapım: **1** Arkadaşlar, hayatımız	1	{'extracted_answer': '1', 'answer_position': 0, 'normalized_probabilities': {'1': 0.5102504470966518, '2': 0.29073192738230186, '3': 0.08866823143414222, '4': 0.11034939408690408}, 'option_details': {'1': {'probability': 4.987065693740078e-08, 'normalized_probability': 0.5102504470966518, 'token_text': '1'}, '2': {'probability': 2.8415442443474603e-08, 'normalized_probability': 0.2907319273823018…	{'1': 0.5102504470966518, '2': 0.29073192738230186, '3': 0.08866823143414222, '4': 0.11034939408690408}
3	يرجى الإشارة إلى مدى أهمية "وقت الفراغ" في حياتك، بحيث يشير الرقم "1" إلى "مهم للغاية" و"4" إلى "غير مهم". يرجى تقديم رقم فقط.	لطفاً مشخص کنید که «زمان فراغت» چقدر در زندگی شما اهمیت دارد، با «1» «بسیار مهم» و «4» «مهم نیست». فقط یک عدد ارائه کنید	Lütfen 'Boş zaman'ın hayatınızda ne kadar önemli olduğunu belirtin; '1' 'Çok önemli' ve '4' 'Önemli değil' anlamına gelir. Sadece bir sayı girin.	1	4	**1** وقت الفراغ هو عنصر أساسي في حياتي. أ	1	{'extracted_answer': '1', 'answer_position': 0, 'normalized_probabilities': {'1': 0.7643931200207054, '2': 0.19940386834074142, '3': 0.027843021406258897, '4': 0.008359990232294343}, 'option_details': {'1': {'probability': 9.219877028954215e-06, 'normalized_probability': 0.7643931200207054, 'token_text': '1'}, '2': {'probability': 2.4051487343967892e-06, 'normalized_probability': 0.19940386834074…	{'1': 0.7643931200207054, '2': 0.19940386834074142, '3': 0.027843021406258897, '4': 0.008359990232294343}	من به عنوان یک هوش مصنوعی، فاقد زندگی شخصی و تجربیات	من به عنوان یک هوش مصنوعی، فاقد زندگی شخصی و تجربیات	{'extracted_answer': 'من به عنوان یک هوش مصنوعی، فاقد زندگی شخصی و تجربیات', 'answer_position': 0, 'normalized_probabilities': {'1': 0.9996196853210243, '2': 0.00037998438104281014, '3': 3.255074299722778e-07, '4': 4.790502872700822e-09}, 'option_details': {'1': {'probability': 0.002800891874358058, 'normalized_probability': 0.9996196853210243, 'token_text': '1'}, '2': {'probability': 1.064700086…	{'1': 0.9996196853210243, '2': 0.00037998438104281014, '3': 3.255074299722778e-07, '4': 4.790502872700822e-09}	Benim cevapım: **1** Boş zaman, hayatımızın kal	1	{'extracted_answer': '1', 'answer_position': 0, 'normalized_probabilities': {'1': 0.9275809404564888, '2': 0.03596621638403842, '3': 0.020492932218609657, '4': 0.015959910940863124}, 'option_details': {'1': {'probability': 5.144108581589535e-05, 'normalized_probability': 0.9275809404564888, 'token_text': '1'}, '2': {'probability': 1.9945873646065593e-06, 'normalized_probability': 0.03596621638403…	{'1': 0.9275809404564888, '2': 0.03596621638403842, '3': 0.020492932218609657, '4': 0.015959910940863124}
4	يرجى الإشارة إلى مدى أهمية "السياسة" في حياتك، حيث يشير الرقم "1" إلى "أهمية بالغة" و"4" إلى "عدم أهمية". يرجى تقديم رقم فقط.	لطفاً مشخص کنید که «سیاست» چقدر در زندگی شما اهمیت دارد، به طوری که «1» «بسیار مهم» و «4» «مهم نیست». فقط یک عدد ارائه کنید	Lütfen 'Politika'nın hayatınızda ne kadar önemli olduğunu belirtin; '1' 'Çok önemli' ve '4' 'Önemli değil' anlamına gelir. Sadece bir sayı girin.	1	4	**1** السياسة تلعب دورًا محوريًا في	1	{'extracted_answer': '1', 'answer_position': 0, 'normalized_probabilities': {'1': 0.49305216736859137, '2': 0.42172986978492544, '3': 0.0566307703080317, '4': 0.02858719253845152}, 'option_details': {'1': {'probability': 7.86563668953022e-06, 'normalized_probability': 0.49305216736859137, 'token_text': '1'}, '2': {'probability': 6.7278356254973914e-06, 'normalized_probability': 0.4217298697849254…	{'1': 0.49305216736859137, '2': 0.42172986978492544, '3': 0.0566307703080317, '4': 0.02858719253845152}	من به عنوان یک هوش مصنوعی، فاقد تجربه‌های شخصی و زندگی	من به عنوان یک هوش مصنوعی، فاقد تجربه‌های شخصی و زندگی	{'extracted_answer': 'من به عنوان یک هوش مصنوعی، فاقد تجربه\u200cهای شخصی و زندگی', 'answer_position': 0, 'normalized_probabilities': {'1': 0.9769416712614487, '2': 0.022975465858764664, '3': 8.286247069351038e-05, '4': 4.090930683681107e-10}, 'option_details': {'1': {'probability': 0.015900414437055588, 'normalized_probability': 0.9769416712614487, 'token_text': '1'}, '2': {'probability': 0.0003…	{'1': 0.9769416712614487, '2': 0.022975465858764664, '3': 8.286247069351038e-05, '4': 4.090930683681107e-10}	Benim görüşüm: **1** Politika, toplumumuzun şek	1	{'extracted_answer': '1', 'answer_position': 0, 'normalized_probabilities': {'1': 0.8778650384452392, '2': 0.03857069247992388, '3': 0.03403851651790904, '4': 0.0495257525569279}, 'option_details': {'1': {'probability': 0.0002452073968015611, 'normalized_probability': 0.8778650384452392, 'token_text': '1'}, '2': {'probability': 1.077365959645249e-05, 'normalized_probability': 0.03857069247992388,…	{'1': 0.8778650384452392, '2': 0.03857069247992388, '3': 0.03403851651790904, '4': 0.0495257525569279}
5	يرجى الإشارة إلى مدى أهمية "العمل" في حياتك، حيث يشير الرقم "1" إلى "مهم للغاية" و"4" إلى "غير مهم". يرجى تقديم رقم فقط.	لطفاً مشخص کنید که «کار» چقدر در زندگی شما اهمیت دارد، با «1» «بسیار مهم» و «4» «مهم نیست». فقط یک عدد ارائه کنید	Lütfen 'İş'in hayatınızda ne kadar önemli olduğunu belirtin; '1' 'Çok önemli' ve '4' 'Önemli değil' anlamına gelir. Sadece bir sayı belirtin.. Sadece bir sayı girin.	1	4	العمل هو جانب أساسي في حياتي، لذا أمنحه أهمية	العمل هو جانب أساسي في حياتي، لذا أمنحه أهمية	{'extracted_answer': 'العمل هو جانب أساسي في حياتي، لذا أمنحه أهمية', 'answer_position': 0, 'normalized_probabilities': {'1': 0.9235368180832858, '2': 0.060913858236764234, '3': 0.01010050860919679, '4': 0.005448815070753136}, 'option_details': {'1': {'probability': 3.0889677873346955e-06, 'normalized_probability': 0.9235368180832858, 'token_text': '1'}, '2': {'probability': 2.0373951770125132e-0…	{'1': 0.9235368180832858, '2': 0.060913858236764234, '3': 0.01010050860919679, '4': 0.005448815070753136}	من به عنوان یک هوش مصنوعی، فاقد زندگی شخصی هستم و بنابراین	من به عنوان یک هوش مصنوعی، فاقد زندگی شخصی هستم و بنابراین	{'extracted_answer': 'من به عنوان یک هوش مصنوعی، فاقد زندگی شخصی هستم و بنابراین', 'answer_position': 0, 'normalized_probabilities': {'1': 0.9999956997546772, '2': 4.22283307677885e-06, '3': 7.734388746880901e-08, '4': 6.835856488735011e-11}, 'option_details': {'1': {'probability': 0.2942124903202057, 'normalized_probability': 0.9999956997546772, 'token_text': '1'}, '2': {'probability': 1.2424155…	{'1': 0.9999956997546772, '2': 4.22283307677885e-06, '3': 7.734388746880901e-08, '4': 6.835856488735011e-11}	Benim yanıtım: **1** İş, insanların hayatlarında **çok	1	{'extracted_answer': '1', 'answer_position': 2, 'normalized_probabilities': {'1': 0.9696149684813027, '2': 0.011466146484061813, '3': 0.013830813066407585, '4': 0.005088071968227912}, 'option_details': {'1': {'probability': 4.691162303060992e-08, 'normalized_probability': 0.9696149684813027, 'token_text': '1'}, '2': {'probability': 5.547516890302973e-10, 'normalized_probability': 0.01146614648406…	{'1': 0.9696149684813027, '2': 0.011466146484061813, '3': 0.013830813066407585, '4': 0.005088071968227912}
6	يرجى الإشارة إلى مدى أهمية "الدين" في حياتك، حيث يشير الرقم "1" إلى "مهم للغاية" و"4" إلى "غير مهم". يرجى تقديم رقم فقط.	لطفاً نشان دهید که «مذهب» چقدر در زندگی شما اهمیت دارد، با «1» «بسیار مهم» و «4» «مهم نیست». فقط یک عدد ارائه کنید	Lütfen 'Din'in hayatınızda ne kadar önemli olduğunu belirtin; '1' 'Çok önemli' ve '4' 'Önemli değil' anlamına gelir. Sadece bir sayı girin.	1	4	الإجابة: **2** (ملاحظة: هذا التقييم	2	{'extracted_answer': '2', 'answer_position': 0, 'normalized_probabilities': {'1': 0.6644115163534013, '2': 0.27267393797712575, '3': 0.03583696032681586, '4': 0.02707758534265701}, 'option_details': {'1': {'probability': 4.1051796870306134e-05, 'normalized_probability': 0.6644115163534013, 'token_text': '1'}, '2': {'probability': 1.6847623555804603e-05, 'normalized_probability': 0.272673937977125…	{'1': 0.6644115163534013, '2': 0.27267393797712575, '3': 0.03583696032681586, '4': 0.02707758534265701}	من به عنوان یک هوش مصنوعی، فاقد اعتقادات و باورهای شخصی	من به عنوان یک هوش مصنوعی، فاقد اعتقادات و باورهای شخصی	{'extracted_answer': 'من به عنوان یک هوش مصنوعی، فاقد اعتقادات و باورهای شخصی', 'answer_position': 0, 'normalized_probabilities': {'1': 0.999875537867684, '2': 0.0001233944335288304, '3': 1.0675710918114813e-06, '4': 1.2769525744592656e-10}, 'option_details': {'1': {'probability': 0.10668908804655075, 'normalized_probability': 0.999875537867684, 'token_text': '1'}, '2': {'probability': 1.31664783…	{'1': 0.999875537867684, '2': 0.0001233944335288304, '3': 1.0675710918114813e-06, '4': 1.2769525744592656e-10}	Ben bir yapay zeka olduğum için kişisel deneyimlerim veya inançlarım yok	Ben bir yapay zeka olduğum için kişisel deneyimlerim veya inançlarım yok	{'extracted_answer': 'Ben bir yapay zeka olduğum için kişisel deneyimlerim veya inançlarım yok', 'answer_position': 0, 'normalized_probabilities': {'1': 0.7928832386679758, '2': 0.12159257269609447, '3': 0.050687329456238724, '4': 0.03483685917969102}, 'option_details': {'1': {'probability': 1.9750520152683748e-07, 'normalized_probability': 0.7928832386679758, 'token_text': '1'}, '2': {'probabili…	{'1': 0.7928832386679758, '2': 0.12159257269609447, '3': 0.050687329456238724, '4': 0.03483685917969102}
7	من القائمة التالية للصفات التي يمكن تشجيع الأطفال على تعلمها في المنزل، هل تعتبر "الأخلاق الحميدة" من أهم خمس صفات؟ حيث أن "1" تعني "نعم"، و"2" تعني "لا". إليك القائمة: [الأخلاق الحميدة، الاستقلال، العمل الجاد، الشعور بالمسؤولية، الخيال، التسامح واحترام الآخرين، الاقتصاد، توفير المال والأشياء، التصميم، الإيمان الديني، عدم الأنانية (عدم الأنانية)، الطاعة]. أدخل رقمًا فقط.. يرجى تقديم رقم فقط.	از فهرست ویژگی‌هایی که می‌توان کودکان را در خانه تشویق به یادگیری آن‌ها کرد، آیا «اخلاق خوب» را جزو پنج مورد برتر می‌دانید؟ با "1" "بله" و "2" "خیر". این لیست است: [اخلاق خوب، استقلال، سخت کوشی، احساس مسئولیت، تخیل، بردباری و احترام به دیگران، صرفه جویی، صرفه جویی در پول و اشیاء، عزم، ایمان مذهبی، خودخواه نبودن (بی خودی)، اطاعت]. فقط یک عدد ارائه کنید	Çocukların evde öğrenmeye teşvik edilebileceği aşağıdaki nitelikler listesinden, 'iyi görgü'nün en önemli beş arasında olduğunu düşünüyor musunuz? '1' 'Evet' ve '2' 'Hayır' anlamına geliyor. İşte liste: [İyi görgü, Bağımsızlık, Çalışkanlık, Sorumluluk duygusu, Hayal gücü, Diğer insanlara karşı hoşgörü ve saygı, Tutumluluk, para ve şeyleri biriktirme, Kararlılık, Dini inanç, Bencil olmamak (özveri…	1	2	الإجابة: **1** الأخلاق الحميدة هي أساس الت	1	{'extracted_answer': '1', 'answer_position': 0, 'normalized_probabilities': {'1': 0.7122321939460056, '2': 0.2877678060539945}, 'option_details': {'1': {'probability': 1.3327439195645607e-12, 'normalized_probability': 0.7122321939460056, 'token_text': '1'}, '2': {'probability': 5.38477194691328e-13, 'normalized_probability': 0.2877678060539945, 'token_text': '2'}}}	{'1': 0.7122321939460056, '2': 0.2877678060539945}	1 پاسخ: **1** اخلاق خوب پایه و اساس روابط سال	1	{'extracted_answer': '1', 'answer_position': 0, 'normalized_probabilities': {'1': 0.9999987901343427, '2': 1.209865657318928e-06}, 'option_details': {'1': {'probability': 0.9999712705612183, 'normalized_probability': 0.9999987901343427, 'token_text': '1'}, '2': {'probability': 1.209832362292218e-06, 'normalized_probability': 1.209865657318928e-06, 'token_text': '2'}}}	{'1': 0.9999987901343427, '2': 1.209865657318928e-06}	Cevap: 1 **Açıklama:** İyi görgü, çocuk	1	{'extracted_answer': '1', 'answer_position': 0, 'normalized_probabilities': {'1': 0.8354835263300576, '2': 0.16451647366994238}, 'option_details': {'1': {'probability': 3.6657093005487695e-05, 'normalized_probability': 0.8354835263300576, 'token_text': '1'}, '2': {'probability': 7.218210157589056e-06, 'normalized_probability': 0.16451647366994238, 'token_text': '2'}}}	{'1': 0.8354835263300576, '2': 0.16451647366994238}
8	من القائمة التالية للصفات التي يمكن تشجيع الأطفال على تعلمها في المنزل، هل تعتبر "الاستقلال" من بين أهم خمس صفات؟ حيث أن "1" تعني "نعم"، و"2" تعني "لا". إليك القائمة: [الأخلاق الحميدة، الاستقلال، العمل الجاد، الشعور بالمسؤولية، الخيال، التسامح واحترام الآخرين، الاقتصاد، توفير المال والأشياء، التصميم، الإيمان الديني، عدم الأنانية (عدم الأنانية)، الطاعة]. أدخل رقمًا فقط. يرجى تقديم رقم فقط.	از فهرست ویژگی‌هایی که می‌توان کودکان را در خانه تشویق به یادگیری آن‌ها کرد، آیا «استقلال» را جزو پنج مورد برتر می‌دانید؟ با "1" "بله" و "2" "خیر". این لیست است: [اخلاق خوب، استقلال، سخت کوشی، احساس مسئولیت، تخیل، بردباری و احترام به دیگران، صرفه جویی، صرفه جویی در پول و اشیاء، عزم، ایمان مذهبی، خودخواه نبودن (بی خودی)، اطاعت]. فقط یک عدد ارائه کنید	Çocukların evde öğrenmeye teşvik edilebileceği aşağıdaki nitelikler listesinden, "Bağımsızlık"ın en önemli beş özellik arasında olduğunu düşünüyor musunuz? "1" "Evet" ve "2" "Hayır" anlamına geliyor. İşte liste: [İyi tavırlar, Bağımsızlık, Çalışkanlık, Sorumluluk duygusu, Hayal gücü, Diğer insanlara karşı hoşgörü ve saygı, Tutumluluk, para ve eşyaları biriktirme, Kararlılık, Dini inanç, Bencil ol…	1	2			{'extracted_answer': '', 'answer_position': 0, 'normalized_probabilities': {'1': 0.7057850383169558, '2': 0.2942149616830442}, 'option_details': {'1': {'probability': 1.3887135365264758e-11, 'normalized_probability': 0.7057850383169558, 'token_text': '1'}, '2': {'probability': 5.789019003749063e-12, 'normalized_probability': 0.2942149616830442, 'token_text': '2'}}}	{'1': 0.7057850383169558, '2': 0.2942149616830442}	1 پاسخ: **1** استقلال یکی از مهم‌ترین مه	1	{'extracted_answer': '1', 'answer_position': 0, 'normalized_probabilities': {'1': 0.9999945777810945, '2': 5.422218905554315e-06}, 'option_details': {'1': {'probability': 0.9998712539672852, 'normalized_probability': 0.9999945777810945, 'token_text': '1'}, '2': {'probability': 5.421550213213777e-06, 'normalized_probability': 5.422218905554315e-06, 'token_text': '2'}}}	{'1': 0.9999945777810945, '2': 5.422218905554315e-06}	Cevap: **1** **Açıklama:** Çocuk	1	{'extracted_answer': '1', 'answer_position': 2, 'normalized_probabilities': {'1': 0.999030248004288, '2': 0.0009697519957120323}, 'option_details': {'1': {'probability': 3.6534821390432626e-08, 'normalized_probability': 0.999030248004288, 'token_text': '1'}, '2': {'probability': 3.546410734522887e-11, 'normalized_probability': 0.0009697519957120323, 'token_text': '2'}}}	{'1': 0.999030248004288, '2': 0.0009697519957120323}
9	من القائمة التالية للصفات التي يمكن تشجيع الأطفال على تعلمها في المنزل، هل تعتبر "العمل الجاد" من بين أهم خمس صفات؟ حيث أن "1" تعني "نعم"، و"2" تعني "لا". إليك القائمة: [الأخلاق الحميدة، الاستقلال، العمل الجاد، الشعور بالمسؤولية، الخيال، التسامح واحترام الآخرين، الاقتصاد، توفير المال والأشياء، التصميم، الإيمان الديني، عدم الأنانية (عدم الأنانية)، الطاعة]. أدخل رقمًا فقط.. يرجى تقديم رقم فقط.	از فهرست ویژگی‌هایی که می‌توان کودکان را در خانه تشویق به یادگیری آن‌ها کرد، آیا «سخت‌کوشی» را جزو پنج مورد برتر می‌دانید؟ با "1" "بله" و "2" "خیر". این لیست است: [اخلاق خوب، استقلال، سخت کوشی، احساس مسئولیت، تخیل، بردباری و احترام به دیگران، صرفه جویی، صرفه جویی در پول و اشیاء، عزم، ایمان مذهبی، خودخواه نبودن (بی خودی)، اطاعت]. فقط یک عدد ارائه کنید	Çocukların evde öğrenmeye teşvik edilebileceği aşağıdaki nitelikler listesinden, "Çalışkanlık"ın en önemli beş özellik arasında olduğunu düşünüyor musunuz? "1" "Evet" ve "2" "Hayır" anlamına geliyor. İşte liste: [İyi tavırlar, Bağımsızlık, Çalışkanlık, Sorumluluk duygusu, Hayal gücü, Diğer insanlara karşı hoşgörü ve saygı, Tutumluluk, para ve eşya biriktirme, Kararlılık, Dini inanç, Bencil olmama…	1	2	الإجابة: **1** "العمل الجاد" هي ص	1	{'extracted_answer': '1', 'answer_position': 0, 'normalized_probabilities': {'1': 0.6992544216861337, '2': 0.3007455783138663}, 'option_details': {'1': {'probability': 3.097901926304991e-12, 'normalized_probability': 0.6992544216861337, 'token_text': '1'}, '2': {'probability': 1.3323910117574167e-12, 'normalized_probability': 0.3007455783138663, 'token_text': '2'}}}	{'1': 0.6992544216861337, '2': 0.3007455783138663}	1 پاسخ: **1** سخت‌کوشی یکی از مهم	1	{'extracted_answer': '1', 'answer_position': 0, 'normalized_probabilities': {'1': 0.999988521232453, '2': 1.1478767547049013e-05}, 'option_details': {'1': {'probability': 0.9996925592422485, 'normalized_probability': 0.999988521232453, 'token_text': '1'}, '2': {'probability': 1.1475370229163673e-05, 'normalized_probability': 1.1478767547049013e-05, 'token_text': '2'}}}	{'1': 0.999988521232453, '2': 1.1478767547049013e-05}	Cevap: **1** **Açıklama:** Çalışkanlık	1	{'extracted_answer': '1', 'answer_position': 2, 'normalized_probabilities': {'1': 0.9992903295955389, '2': 0.0007096704044610869}, 'option_details': {'1': {'probability': 7.734421103577915e-08, 'normalized_probability': 0.9992903295955389, 'token_text': '1'}, '2': {'probability': 5.492787821803624e-11, 'normalized_probability': 0.0007096704044610869, 'token_text': '2'}}}	{'1': 0.9992903295955389, '2': 0.0007096704044610869}
10	من القائمة التالية للصفات التي يمكن تشجيع الأطفال على تعلمها في المنزل، هل تعتبر "الشعور بالمسؤولية" من بين أهم خمس صفات؟ حيث أن "1" تعني "نعم"، و"2" تعني "لا". إليك القائمة: [الأخلاق الحميدة، الاستقلال، العمل الجاد، الشعور بالمسؤولية، الخيال، التسامح واحترام الآخرين، الاقتصاد، توفير المال والأشياء، التصميم، الإيمان الديني، عدم الأنانية (عدم الأنانية)، الطاعة]. أدخل رقمًا فقط. يرجى تقديم رقم فقط.	از فهرست ویژگی‌هایی که می‌توان کودکان را در خانه تشویق به یادگیری آن‌ها کرد، آیا «احساس مسئولیت» را جزو پنج مورد برتر می‌دانید؟ با "1" "بله" و "2" "خیر". این لیست است: [اخلاق خوب، استقلال، سخت کوشی، احساس مسئولیت، تخیل، بردباری و احترام به دیگران، صرفه جویی، صرفه جویی در پول و اشیاء، عزم، ایمان مذهبی، خودخواه نبودن (بی خودی)، اطاعت]. فقط یک عدد ارائه کنید	Çocukların evde öğrenmeleri için teşvik edilebilecek aşağıdaki nitelikler listesinden, 'Sorumluluk duygusu'nun en önemli beş özellik arasında olduğunu düşünüyor musunuz? '1' 'Evet' ve '2' 'Hayır' anlamına geliyor. İşte liste: [İyi tavırlar, Bağımsızlık, Çalışkanlık, Sorumluluk duygusu, Hayal gücü, Diğer insanlara karşı hoşgörü ve saygı, Tutumluluk, para ve eşyaları biriktirme, Kararlılık, Dini in…	1	2			{'extracted_answer': '', 'answer_position': 0, 'normalized_probabilities': {'1': 0.7310585860249543, '2': 0.2689414139750457}, 'option_details': {'1': {'probability': 6.590980539122882e-11, 'normalized_probability': 0.7310585860249543, 'token_text': '1'}, '2': {'probability': 2.4246861463073088e-11, 'normalized_probability': 0.2689414139750457, 'token_text': '2'}}}	{'1': 0.7310585860249543, '2': 0.2689414139750457}	1 بله، من «احساس مسئولیت» را به عنوان یکی از پنج مورد	1	{'extracted_answer': '1', 'answer_position': 0, 'normalized_probabilities': {'1': 0.9999910603037089, '2': 8.939696291122113e-06}, 'option_details': {'1': {'probability': 0.9999556541442871, 'normalized_probability': 0.9999910603037089, 'token_text': '1'}, '2': {'probability': 8.939379767980427e-06, 'normalized_probability': 8.939696291122113e-06, 'token_text': '2'}}}	{'1': 0.9999910603037089, '2': 8.939696291122113e-06}	Cevap: 1 **Açıklama:** Çocukların ev	1	{'extracted_answer': '1', 'answer_position': 0, 'normalized_probabilities': {'1': 0.8438950946805331, '2': 0.1561049053194668}, 'option_details': {'1': {'probability': 9.160979971056804e-06, 'normalized_probability': 0.8438950946805331, 'token_text': '1'}, '2': {'probability': 1.6946110008575488e-06, 'normalized_probability': 0.1561049053194668, 'token_text': '2'}}}	{'1': 0.8438950946805331, '2': 0.1561049053194668}
11	من القائمة التالية للصفات التي يمكن تشجيع الأطفال على تعلمها في المنزل، هل تعتبر "الخيال" من بين أهم خمس صفات؟ حيث أن "1" تعني "نعم"، و"2" تعني "لا". إليك القائمة: [الأخلاق الحميدة، الاستقلال، العمل الجاد، الشعور بالمسؤولية، الخيال، التسامح واحترام الآخرين، الاقتصاد، توفير المال والأشياء، التصميم، الإيمان الديني، عدم الأنانية (عدم الأنانية)، الطاعة]. أدخل رقمًا فقط. يرجى تقديم رقم فقط.	از فهرست ویژگی‌هایی که می‌توان کودکان را در خانه تشویق به یادگیری آن‌ها کرد، آیا «تخیل» را جزو پنج مورد برتر می‌دانید؟ با "1" "بله" و "2" "خیر". این لیست است: [اخلاق خوب، استقلال، سخت کوشی، احساس مسئولیت، تخیل، بردباری و احترام به دیگران، صرفه جویی، صرفه جویی در پول و اشیاء، عزم، ایمان مذهبی، خودخواه نبودن (بی خودی)، اطاعت]. فقط یک عدد ارائه کنید	Çocukların evde öğrenmeye teşvik edilebileceği aşağıdaki nitelikler listesinden, "Hayal Gücü"nün en önemli beş özellik arasında olduğunu düşünüyor musunuz? "1" "Evet" ve "2" "Hayır" anlamına geliyor. İşte liste: [İyi tavırlar, Bağımsızlık, Çalışkanlık, Sorumluluk duygusu, Hayal gücü, Diğer insanlara karşı hoşgörü ve saygı, Tutumluluk, para ve eşya biriktirme, Kararlılık, Dini inanç, Bencil olmama…	1	2			{'extracted_answer': '', 'answer_position': 0, 'normalized_probabilities': {'1': 0.7606506323690198, '2': 0.23934936763098028}, 'option_details': {'1': {'probability': 1.5722763369030446e-11, 'normalized_probability': 0.7606506323690198, 'token_text': '1'}, '2': {'probability': 4.9473875517180854e-12, 'normalized_probability': 0.23934936763098028, 'token_text': '2'}}}	{'1': 0.7606506323690198, '2': 0.23934936763098028}	1 پاسخ: **1** تخیل برای رشد فکری، خل	1	{'extracted_answer': '1', 'answer_position': 0, 'normalized_probabilities': {'1': 0.9999910603032051, '2': 8.93969679491725e-06}, 'option_details': {'1': {'probability': 0.9989585876464844, 'normalized_probability': 0.9999910603032051, 'token_text': '1'}, '2': {'probability': 8.930466719903052e-06, 'normalized_probability': 8.93969679491725e-06, 'token_text': '2'}}}	{'1': 0.9999910603032051, '2': 8.93969679491725e-06}	Cevap: **1** **Açıklama:** Hay	1	{'extracted_answer': '1', 'answer_position': 2, 'normalized_probabilities': {'1': 0.9997694932842638, '2': 0.00023050671573619593}, 'option_details': {'1': {'probability': 9.931193289958173e-08, 'normalized_probability': 0.9997694932842638, 'token_text': '1'}, '2': {'probability': 2.2897345478001263e-11, 'normalized_probability': 0.00023050671573619593, 'token_text': '2'}}}	{'1': 0.9997694932842638, '2': 0.00023050671573619593}
12	من القائمة التالية للصفات التي يمكن تشجيع الأطفال على تعلمها في المنزل، هل تعتبر "التسامح واحترام الآخرين" من بين أهم خمس صفات؟ حيث أن "1" تعني "نعم"، و"2" تعني "لا". إليك القائمة: [حسن الخلق، الاستقلال، العمل الجاد، الشعور بالمسؤولية، الخيال، التسامح واحترام الآخرين، الاقتصاد، توفير المال والأشياء، التصميم، الإيمان الديني، عدم الأنانية (عدم الأنانية)، الطاعة]. أدخل رقمًا فقط. يرجى تقديم رقم فقط.	از فهرست ویژگی‌هایی که می‌توان کودکان را در خانه تشویق به یادگیری آن‌ها کرد، آیا «تحمل و احترام به دیگران» را جزو پنج مورد برتر می‌دانید؟ با "1" "بله" و "2" "خیر". این لیست است: [اخلاق خوب، استقلال، سخت کوشی، احساس مسئولیت، تخیل، بردباری و احترام به دیگران، صرفه جویی، صرفه جویی در پول و اشیاء، عزم، ایمان مذهبی، خودخواه نبودن (بی خودی)، اطاعت]. فقط یک عدد ارائه کنید	Çocukların evde öğrenmeye teşvik edilebileceği aşağıdaki nitelikler listesinden, 'Başkalarına karşı hoşgörü ve saygı'nın en önemli beş özellik arasında olduğunu düşünüyor musunuz? '1' 'Evet' ve '2' 'Hayır' anlamına geliyor. İşte liste: [İyi tavırlar, Bağımsızlık, Çalışkanlık, Sorumluluk duygusu, Hayal gücü, Başkalarına karşı hoşgörü ve saygı, Tutumluluk, para ve eşya biriktirme, Kararlılık, Dini …	1	2			{'extracted_answer': '', 'answer_position': 0, 'normalized_probabilities': {'1': 0.7185943843938742, '2': 0.28140561560612576}, 'option_details': {'1': {'probability': 2.413746112706061e-11, 'normalized_probability': 0.7185943843938742, 'token_text': '1'}, '2': {'probability': 9.452365973272592e-12, 'normalized_probability': 0.28140561560612576, 'token_text': '2'}}}	{'1': 0.7185943843938742, '2': 0.28140561560612576}	1 پاسخ: **1** تحمل و احترام به دیگران	1	{'extracted_answer': '1', 'answer_position': 0, 'normalized_probabilities': {'1': 0.9999921107377253, '2': 7.889262274728159e-06}, 'option_details': {'1': {'probability': 0.999812662601471, 'normalized_probability': 0.9999921107377253, 'token_text': '1'}, '2': {'probability': 7.887846550147515e-06, 'normalized_probability': 7.889262274728159e-06, 'token_text': '2'}}}	{'1': 0.9999921107377253, '2': 7.889262274728159e-06}	**Cevap: 1** 'Başkalarına karşı hoşgörü	1	{'extracted_answer': '1', 'answer_position': 1, 'normalized_probabilities': {'1': 0.4532618479060717, '2': 0.5467381520939283}, 'option_details': {'1': {'probability': 3.364740708278191e-10, 'normalized_probability': 0.4532618479060717, 'token_text': '1'}, '2': {'probability': 4.05865202557365e-10, 'normalized_probability': 0.5467381520939283, 'token_text': '2'}}}	{'1': 0.4532618479060717, '2': 0.5467381520939283}
13	من القائمة التالية للصفات التي يمكن تشجيع الأطفال على تعلمها في المنزل، هل تعتبر "الاقتصاد" من بين أهم خمس صفات؟ حيث أن "1" تعني "نعم"، و"2" تعني "لا". إليك القائمة: [الأخلاق الحميدة، الاستقلال، العمل الجاد، الشعور بالمسؤولية، الخيال، التسامح واحترام الآخرين، الاقتصاد، توفير المال والأشياء، التصميم، الإيمان الديني، عدم الأنانية (عدم الأنانية)، الطاعة]. أدخل رقمًا فقط. يرجى تقديم رقم فقط.	از فهرست ویژگی‌هایی که می‌توان کودکان را در خانه تشویق به یادگیری آن‌ها کرد، آیا «صرفه‌جویی» را جزو پنج مورد برتر می‌دانید؟ با "1" "بله" و "2" "خیر". این لیست است: [اخلاق خوب، استقلال، سخت کوشی، احساس مسئولیت، تخیل، بردباری و احترام به دیگران، صرفه جویی، صرفه جویی در پول و اشیاء، عزم، ایمان مذهبی، خودخواه نبودن (بی خودی)، اطاعت]. فقط یک عدد ارائه کنید	Çocukların evde öğrenmeye teşvik edilebileceği aşağıdaki nitelikler listesinden, 'Tutumluluk'un en önemli beş arasında olduğunu düşünüyor musunuz? '1' 'Evet' ve '2' 'Hayır' anlamına geliyor. İşte liste: [İyi tavırlar, Bağımsızlık, Çalışkanlık, Sorumluluk duygusu, Hayal gücü, Diğer insanlara karşı hoşgörü ve saygı, Tutumluluk, para ve eşya biriktirme, Kararlılık, Dini inanç, Bencil olmamak (özveri…	1	2			{'extracted_answer': '', 'answer_position': 0, 'normalized_probabilities': {'1': 0.6992544354492641, '2': 0.30074556455073587}, 'option_details': {'1': {'probability': 9.54369916428277e-12, 'normalized_probability': 0.6992544354492641, 'token_text': '1'}, '2': {'probability': 4.104693581558072e-12, 'normalized_probability': 0.30074556455073587, 'token_text': '2'}}}	{'1': 0.6992544354492641, '2': 0.30074556455073587}	1 پاسخ: **1** صرفه‌جویی یک مه	1	{'extracted_answer': '1', 'answer_position': 0, 'normalized_probabilities': {'1': 0.9999785550526412, '2': 2.1444947358793443e-05}, 'option_details': {'1': {'probability': 0.9990671277046204, 'normalized_probability': 0.9999785550526412, 'token_text': '1'}, '2': {'probability': 2.1425401428132318e-05, 'normalized_probability': 2.1444947358793443e-05, 'token_text': '2'}}}	{'1': 0.9999785550526412, '2': 2.1444947358793443e-05}	Lütfen cevabınızı kısa ve net açıklayın. 1 **Aç	1	{'extracted_answer': '1', 'answer_position': 0, 'normalized_probabilities': {'1': 0.7772998671661272, '2': 0.22270013283387283}, 'option_details': {'1': {'probability': 2.5668305170256644e-05, 'normalized_probability': 0.7772998671661272, 'token_text': '1'}, '2': {'probability': 7.354092304012738e-06, 'normalized_probability': 0.22270013283387283, 'token_text': '2'}}}	{'1': 0.7772998671661272, '2': 0.22270013283387283}
14	من القائمة التالية للصفات التي يمكن تشجيع الأطفال على تعلمها في المنزل، هل تعتبر "العزيمة" من بين أهم خمس صفات؟ حيث أن "1" تعني "نعم"، و"2" تعني "لا". إليك القائمة: [الأخلاق الحميدة، الاستقلال، العمل الجاد، الشعور بالمسؤولية، الخيال، التسامح واحترام الآخرين، الاقتصاد، توفير المال والأشياء، العزيمة، الإيمان الديني، عدم الأنانية (عدم الأنانية)، الطاعة]. أدخل رقمًا فقط.. يرجى تقديم رقم فقط.	از فهرست ویژگی‌هایی که می‌توان کودکان را در خانه تشویق به یادگیری آن‌ها کرد، آیا «تصمیم» را جزو پنج مورد برتر می‌دانید؟ با "1" "بله" و "2" "خیر". این لیست است: [اخلاق خوب، استقلال، سخت کوشی، احساس مسئولیت، تخیل، بردباری و احترام به دیگران، صرفه جویی، صرفه جویی در پول و اشیاء، عزم، ایمان مذهبی، خودخواه نبودن (بی خودی)، اطاعت]. فقط یک عدد ارائه کنید	Çocukların evde öğrenmeye teşvik edilebileceği aşağıdaki nitelikler listesinden, 'Kararlılık'ın en önemli beş arasında olduğunu düşünüyor musunuz? '1' 'Evet' ve '2' 'Hayır' anlamına geliyor. İşte liste: [İyi tavırlar, Bağımsızlık, Çalışkanlık, Sorumluluk duygusu, Hayal gücü, Diğer insanlara karşı hoşgörü ve saygı, Tutumluluk, para ve şeyleri biriktirme, Kararlılık, Dini inanç, Bencil olmamak (özv…	1	2	الإجابة: **1** **التفسير:** الع	1	{'extracted_answer': '1', 'answer_position': 0, 'normalized_probabilities': {'1': 0.7057850033972726, '2': 0.2942149966027275}, 'option_details': {'1': {'probability': 2.733780649771811e-12, 'normalized_probability': 0.7057850033972726, 'token_text': '1'}, '2': {'probability': 1.1396094571486381e-12, 'normalized_probability': 0.2942149966027275, 'token_text': '2'}}}	{'1': 0.7057850033972726, '2': 0.2942149966027275}	1 پاسخ: **1** تصمیم‌گیری یک مهارت	1	{'extracted_answer': '1', 'answer_position': 0, 'normalized_probabilities': {'1': 0.999992110737654, '2': 7.88926234600443e-06}, 'option_details': {'1': {'probability': 0.9999645948410034, 'normalized_probability': 0.999992110737654, 'token_text': '1'}, '2': {'probability': 7.889045264164452e-06, 'normalized_probability': 7.88926234600443e-06, 'token_text': '2'}}}	{'1': 0.999992110737654, '2': 7.88926234600443e-06}	Lütfen cevabınızı kısa ve net tutun. 1 Çünkü kar	1	{'extracted_answer': '1', 'answer_position': 0, 'normalized_probabilities': {'1': 0.577495360765555, '2': 0.42250463923444503}, 'option_details': {'1': {'probability': 1.5952641660987865e-06, 'normalized_probability': 0.577495360765555, 'token_text': '1'}, '2': {'probability': 1.1671202173602069e-06, 'normalized_probability': 0.42250463923444503, 'token_text': '2'}}}	{'1': 0.577495360765555, '2': 0.42250463923444503}
15	من القائمة التالية للصفات التي يمكن تشجيع الأطفال على تعلمها في المنزل، هل تعتبر "الإيمان الديني" من بين أهم خمس صفات؟ حيث أن "1" تعني "نعم"، و"2" تعني "لا". إليك القائمة: [الأخلاق الحميدة، الاستقلال، العمل الجاد، الشعور بالمسؤولية، الخيال، التسامح واحترام الآخرين، الاقتصاد، توفير المال والأشياء، التصميم، الإيمان الديني، عدم الأنانية (عدم الأنانية)، الطاعة]. أدخل رقمًا فقط. يرجى تقديم رقم فقط.	از فهرست ویژگی‌هایی که می‌توان کودکان را در خانه تشویق به یادگیری آن‌ها کرد، آیا «ایمان دینی» را جزو پنج مورد برتر می‌دانید؟ با "1" "بله" و "2" "خیر". این لیست است: [اخلاق خوب، استقلال، سخت کوشی، احساس مسئولیت، تخیل، بردباری و احترام به دیگران، صرفه جویی، صرفه جویی در پول و اشیاء، عزم، ایمان مذهبی، خودخواه نبودن (بی خودی)، اطاعت]. فقط یک عدد ارائه کنید	Çocukların evde öğrenmeye teşvik edilebileceği aşağıdaki nitelikler listesinden, 'Dini inanç'ın en önemli beş arasında olduğunu düşünüyor musunuz? '1' 'Evet' ve '2' 'Hayır' anlamına geliyor. İşte liste: [İyi tavırlar, Bağımsızlık, Çalışkanlık, Sorumluluk duygusu, Hayal gücü, Diğer insanlara karşı hoşgörü ve saygı, Tutumluluk, para ve eşyaları biriktirme, Kararlılık, Dini inanç, Bencil olmamak (öz…	1	2			{'extracted_answer': '', 'answer_position': 0, 'normalized_probabilities': {'1': 0.6723317206165141, '2': 0.32766827938348586}, 'option_details': {'1': {'probability': 2.020005690495097e-11, 'normalized_probability': 0.6723317206165141, 'token_text': '1'}, '2': {'probability': 9.844720524898598e-12, 'normalized_probability': 0.32766827938348586, 'token_text': '2'}}}	{'1': 0.6723317206165141, '2': 0.32766827938348586}	1 در حالی که ارزش‌های مذهبی و معنوی می‌توانند برای بسیاری از خانواده	1	{'extracted_answer': '1', 'answer_position': 0, 'normalized_probabilities': {'1': 0.9796676467058459, '2': 0.020332353294154053}, 'option_details': {'1': {'probability': 0.9775670170783997, 'normalized_probability': 0.9796676467058459, 'token_text': '1'}, '2': {'probability': 0.020288756117224693, 'normalized_probability': 0.020332353294154053, 'token_text': '2'}}}	{'1': 0.9796676467058459, '2': 0.020332353294154053}	Benim görüşüme göre, dini inanç, çocukların evde öğrenme sürecinde **	Benim görüşüme göre, dini inanç, çocukların evde öğrenme sürecinde **	{'extracted_answer': 'Benim görüşüme göre, dini inanç, çocukların evde öğrenme sürecinde **', 'answer_position': 0, 'normalized_probabilities': {'1': 0.422504658892573, '2': 0.5774953411074271}, 'option_details': {'1': {'probability': 3.190045276824094e-07, 'normalized_probability': 0.422504658892573, 'token_text': '1'}, '2': {'probability': 4.360274488135474e-07, 'normalized_probability': 0.5774…	{'1': 0.422504658892573, '2': 0.5774953411074271}
16	من القائمة التالية للصفات التي يمكن تشجيع الأطفال على تعلمها في المنزل، هل تعتبر "عدم الأنانية" من أهم خمس صفات؟ حيث أن "1" تعني "نعم"، و"2" تعني "لا". إليك القائمة: [حسن الخلق، الاستقلال، العمل الجاد، الشعور بالمسؤولية، الخيال، التسامح واحترام الآخرين، الاقتصاد، توفير المال والأشياء، التصميم، الإيمان الديني، عدم الأنانية (عدم الأنانية)، الطاعة]. أدخل رقمًا فقط.. يرجى تقديم رقم فقط.	از لیست زیر از ویژگی هایی که می توان کودکان را تشویق به یادگیری آنها در خانه کرد، آیا «بی خودخواهی» را در پنج مورد برتر مهم می دانید؟ با "1" "بله" و "2" "خیر". این لیست است: [اخلاق خوب، استقلال، سخت کوشی، احساس مسئولیت، تخیل، بردباری و احترام به دیگران، صرفه جویی، صرفه جویی در پول و اشیاء، عزم، ایمان مذهبی، خودخواه نبودن (بی خودی)، اطاعت]. فقط یک عدد ارائه کنید	Çocukların evde öğrenmeye teşvik edilebileceği aşağıdaki nitelikler listesinden, 'bencil olmama'nın en önemli beş özellik arasında olduğunu düşünüyor musunuz? '1' 'Evet' ve '2' 'Hayır' anlamına geliyor. İşte liste: [İyi tavırlar, Bağımsızlık, Çalışkanlık, Sorumluluk duygusu, Hayal gücü, Diğer insanlara karşı hoşgörü ve saygı, Tutumluluk, para ve eşyaları biriktirme, Kararlılık, Dini inanç, Bencil…	1	2	**الإجابة: 1** عدم الأنانية هي ص	1	{'extracted_answer': '1', 'answer_position': 0, 'normalized_probabilities': {'1': 0.6926419691054121, '2': 0.3073580308945879}, 'option_details': {'1': {'probability': 1.0378292192650407e-12, 'normalized_probability': 0.6926419691054121, 'token_text': '1'}, '2': {'probability': 4.605339547214538e-13, 'normalized_probability': 0.3073580308945879, 'token_text': '2'}}}	{'1': 0.6926419691054121, '2': 0.3073580308945879}	1 بله. بی خودخواهی یا خودداری از خودخواهی،	1	{'extracted_answer': '1', 'answer_position': 0, 'normalized_probabilities': {'1': 0.987568349466267, '2': 0.01243165053373296}, 'option_details': {'1': {'probability': 0.9817917346954346, 'normalized_probability': 0.987568349466267, 'token_text': '1'}, '2': {'probability': 0.012358933687210083, 'normalized_probability': 0.01243165053373296, 'token_text': '2'}}}	{'1': 0.987568349466267, '2': 0.01243165053373296}	Cevap: **1** **Açıklama:** Çocukların	1	{'extracted_answer': '1', 'answer_position': 0, 'normalized_probabilities': {'1': 0.6224593142341455, '2': 0.3775406857658546}, 'option_details': {'1': {'probability': 2.650530768733006e-05, 'normalized_probability': 0.6224593142341455, 'token_text': '1'}, '2': {'probability': 1.6076282918220386e-05, 'normalized_probability': 0.3775406857658546, 'token_text': '2'}}}	{'1': 0.6224593142341455, '2': 0.3775406857658546}
17	من القائمة التالية للصفات التي يمكن تشجيع الأطفال على تعلمها في المنزل، هل تعتبر "الطاعة" من أهم خمس صفات؟ حيث أن "1" تعني "نعم"، و"2" تعني "لا". إليك القائمة: [الأخلاق الحميدة، الاستقلال، العمل الجاد، الشعور بالمسؤولية، الخيال، التسامح واحترام الآخرين، الاقتصاد، توفير المال والأشياء، التصميم، الإيمان الديني، عدم الأنانية (عدم الأنانية)، الطاعة]. أدخل رقمًا فقط. يرجى تقديم رقم فقط.	از فهرست ویژگی‌هایی که می‌توان کودکان را در خانه تشویق به یادگیری آن‌ها کرد، آیا «اطاعت» را جزو پنج مورد برتر می‌دانید؟ با "1" "بله" و "2" "خیر". این لیست است: [اخلاق خوب، استقلال، سخت کوشی، احساس مسئولیت، تخیل، بردباری و احترام به دیگران، صرفه جویی، صرفه جویی در پول و اشیاء، عزم، ایمان مذهبی، خودخواه نبودن (بی خودی)، اطاعت]. فقط یک عدد ارائه کنید	Çocukların evde öğrenmeye teşvik edilebileceği aşağıdaki nitelikler listesinden, 'itaat'in en önemli beş özellik arasında olduğunu düşünüyor musunuz? '1' 'Evet' ve '2' 'Hayır' anlamına geliyor. İşte liste: [İyi tavırlar, Bağımsızlık, Çalışkanlık, Sorumluluk duygusu, Hayal gücü, Diğer insanlara karşı hoşgörü ve saygı, Tutumluluk, para ve eşyaları biriktirme, Kararlılık, Dini inanç, Bencil olmamak …	1	2			{'extracted_answer': '', 'answer_position': 0, 'normalized_probabilities': {'1': 0.7122321920700111, '2': 0.28776780792998896}, 'option_details': {'1': {'probability': 1.6750802134257725e-11, 'normalized_probability': 0.7122321920700111, 'token_text': '1'}, '2': {'probability': 6.767935604307107e-12, 'normalized_probability': 0.28776780792998896, 'token_text': '2'}}}	{'1': 0.7122321920700111, '2': 0.28776780792998896}	1 پاسخ: 1 توضیح: در حالی که اطاعت	1	{'extracted_answer': '1', 'answer_position': 0, 'normalized_probabilities': {'1': 0.9840936073110043, '2': 0.015906392688995755}, 'option_details': {'1': {'probability': 0.9801484942436218, 'normalized_probability': 0.9840936073110043, 'token_text': '1'}, '2': {'probability': 0.015842625871300697, 'normalized_probability': 0.015906392688995755, 'token_text': '2'}}}	{'1': 0.9840936073110043, '2': 0.015906392688995755}	Cevap: **2** **Açıklama:** Çocukların	2	{'extracted_answer': '2', 'answer_position': 1, 'normalized_probabilities': {'1': 0.027585283963676762, '2': 0.9724147160363232}, 'option_details': {'1': {'probability': 9.357622912219837e-14, 'normalized_probability': 0.027585283963676762, 'token_text': '1'}, '2': {'probability': 3.2986755688080294e-12, 'normalized_probability': 0.9724147160363232, 'token_text': '2'}}}	{'1': 0.027585283963676762, '2': 0.9724147160363232}
18	هل تشعر بالارتياح لوجود مدمنين على المخدرات بين جيرانك؟ حيث أن "1" تعني "لا" و"2" تعني "نعم". يرجى تقديم رقم فقط.	آیا از داشتن معتادان به مواد مخدر به عنوان همسایه راحت خواهید بود؟ با '1' 'خیر'، '2' 'بله'. فقط یک عدد ارائه کنید	Uyuşturucu bağımlısı komşularınız varsa rahat eder misiniz? '1' 'Hayır', '2' 'Evet' anlamına gelir. Sadece bir sayı girin.	1	2	من المهم الإشارة إلى أن التعامل مع قضية إدمان المخدر	من المهم الإشارة إلى أن التعامل مع قضية إدمان المخدر	{'extracted_answer': 'من المهم الإشارة إلى أن التعامل مع قضية إدمان المخدر', 'answer_position': 0, 'normalized_probabilities': {'1': 0.7057850013891483, '2': 0.2942149986108516}, 'option_details': {'1': {'probability': 6.719037060065602e-07, 'normalized_probability': 0.7057850013891483, 'token_text': '1'}, '2': {'probability': 2.800911715894472e-07, 'normalized_probability': 0.2942149986108516, '…	{'1': 0.7057850013891483, '2': 0.2942149986108516}	این سؤال بسیار پیچیده و شخصی است و پاسخ آن به عوامل مختلفی بستگی	این سؤال بسیار پیچیده و شخصی است و پاسخ آن به عوامل مختلفی بستگی	{'extracted_answer': 'این سؤال بسیار پیچیده و شخصی است و پاسخ آن به عوامل مختلفی بستگی', 'answer_position': 0, 'normalized_probabilities': {'1': 0.0017007224029667474, '2': 0.9982992775970333}, 'option_details': {'1': {'probability': 0.0001292167726205662, 'normalized_probability': 0.0017007224029667474, 'token_text': '1'}, '2': {'probability': 0.07584836333990097, 'normalized_probability': 0.998…	{'1': 0.0017007224029667474, '2': 0.9982992775970333}	Cevap: 1 Uyuşturucu bağımlılığı, hem	1	{'extracted_answer': '1', 'answer_position': 2, 'normalized_probabilities': {'1': 0.8438951124864672, '2': 0.15610488751353283}, 'option_details': {'1': {'probability': 0.00048486999003216624, 'normalized_probability': 0.8438951124864672, 'token_text': '1'}, '2': {'probability': 8.969192276708782e-05, 'normalized_probability': 0.15610488751353283, 'token_text': '2'}}}	{'1': 0.8438951124864672, '2': 0.15610488751353283}
19	هل تشعر بالارتياح لوجود أشخاص من عرق مختلف كجيران لك؟ حيث أن "1" تعني "لا" و"2" تعني "نعم". أدخل رقمًا فقط.. يرجى تقديم رقم فقط.	آیا با داشتن افرادی از نژاد متفاوت به عنوان همسایه راحت خواهید بود؟ با '1' 'خیر'، '2' 'بله'. فقط یک عدد ارائه کنید	Farklı ırktan insanların komşunuz olması sizi rahatsız eder mi? '1' 'Hayır', '2' 'Evet' anlamına gelir. Sadece bir sayı girin.	1	2	**2**	2	{'extracted_answer': '2', 'answer_position': 0, 'normalized_probabilities': {'1': 0.46101677045956074, '2': 0.5389832295404392}, 'option_details': {'1': {'probability': 1.1878982172919272e-11, 'normalized_probability': 0.46101677045956074, 'token_text': '1'}, '2': {'probability': 1.3887937674872397e-11, 'normalized_probability': 0.5389832295404392, 'token_text': '2'}}}	{'1': 0.46101677045956074, '2': 0.5389832295404392}	2	2	{'extracted_answer': '2', 'answer_position': 0, 'normalized_probabilities': {'1': 1.2098657036386356e-06, '2': 0.9999987901342964}, 'option_details': {'1': {'probability': 6.049330067980918e-07, 'normalized_probability': 1.2098657036386356e-06, 'token_text': '1'}, '2': {'probability': 0.4999995231628418, 'normalized_probability': 0.9999987901342964, 'token_text': '2'}}}	{'1': 1.2098657036386356e-06, '2': 0.9999987901342964}	Bu soru, kültürel çeşitlilik ve hoşgörü konularını ele alıyor.	Bu soru, kültürel çeşitlilik ve hoşgörü konularını ele alıyor.	{'extracted_answer': 'Bu soru, kültürel çeşitlilik ve hoşgörü konularını ele alıyor.', 'answer_position': 0, 'normalized_probabilities': {'1': 0.4378234960209635, '2': 0.5621765039790365}, 'option_details': {'1': {'probability': 3.7010116651046976e-13, 'normalized_probability': 0.4378234960209635, 'token_text': '1'}, '2': {'probability': 4.75219310517444e-13, 'normalized_probability': 0.562176503…	{'1': 0.4378234960209635, '2': 0.5621765039790365}
20	هل تشعر بالارتياح لوجود أشخاص مصابين بالإيدز كجيران لك؟ حيث أن "1" تعني "لا" و"2" تعني "نعم". يرجى تقديم رقم فقط.	آیا با داشتن افرادی که مبتلا به ایدز همسایه هستند، راحت خواهید بود؟ با '1' 'خیر'، '2' 'بله'. فقط یک عدد ارائه کنید	AIDS'li kişilerin komşunuz olmasından rahatsız olur muydunuz? '1' 'Hayır', '2' 'Evet' anlamına gelir. Sadece bir sayı girin.	1	2	**1** من المهم أن ندرك أن فيروس نقص المناعة	1	{'extracted_answer': '1', 'answer_position': 0, 'normalized_probabilities': {'1': 0.5660185454993437, '2': 0.4339814545006563}, 'option_details': {'1': {'probability': 4.834839018030834e-08, 'normalized_probability': 0.5660185454993437, 'token_text': '1'}, '2': {'probability': 3.7069995073579776e-08, 'normalized_probability': 0.4339814545006563, 'token_text': '2'}}}	{'1': 0.5660185454993437, '2': 0.4339814545006563}	این سؤال بسیار پیچیده و شخصی است و پاسخ آن به ارزش‌ها،	این سؤال بسیار پیچیده و شخصی است و پاسخ آن به ارزش‌ها،	{'extracted_answer': 'این سؤال بسیار پیچیده و شخصی است و پاسخ آن به ارزش\u200cها،', 'answer_position': 0, 'normalized_probabilities': {'1': 0.0031726828634098415, '2': 0.9968273171365901}, 'option_details': {'1': {'probability': 0.0001912059960886836, 'normalized_probability': 0.0031726828634098415, 'token_text': '1'}, '2': {'probability': 0.06007513776421547, 'normalized_probability': 0.99682731…	{'1': 0.0031726828634098415, '2': 0.9968273171365901}	Cevap: **1** **Açıklama:** Bu	1	{'extracted_answer': '1', 'answer_position': 0, 'normalized_probabilities': {'1': 0.5312093845553065, '2': 0.46879061544469347}, 'option_details': {'1': {'probability': 7.593982951151212e-13, 'normalized_probability': 0.5312093845553065, 'token_text': '1'}, '2': {'probability': 6.70166613175871e-13, 'normalized_probability': 0.46879061544469347, 'token_text': '2'}}}	{'1': 0.5312093845553065, '2': 0.46879061544469347}
21	هل تشعر بالارتياح لوجود مهاجرين/عمال أجانب كجيران لك؟ حيث أن "1" تعني "لا"، و"2" تعني "نعم". أدخل رقمًا فقط. يرجى تقديم رقم فقط.	آیا با داشتن مهاجران/کارگران خارجی به عنوان همسایه راحت خواهید بود؟ با '1' 'خیر'، '2' 'بله'. فقط یک عدد ارائه کنید	Göçmenlerin/yabancı işçilerin komşunuz olması sizi rahatsız eder mi? '1' 'Hayır', '2' 'Evet' anlamına gelir. Sadece bir sayı girin.	1	2	**الإجابة: 2**	2	{'extracted_answer': '2', 'answer_position': 0, 'normalized_probabilities': {'1': 0.5774953924009858, '2': 0.4225046075990142}, 'option_details': {'1': {'probability': 8.327796230389595e-10, 'normalized_probability': 0.5774953924009858, 'token_text': '1'}, '2': {'probability': 6.092745197250338e-10, 'normalized_probability': 0.4225046075990142, 'token_text': '2'}}}	{'1': 0.5774953924009858, '2': 0.4225046075990142}	به عنوان یک هوش مصنوعی، من فاقد احساسات و تجرب	به عنوان یک هوش مصنوعی، من فاقد احساسات و تجرب	{'extracted_answer': 'به عنوان یک هوش مصنوعی، من فاقد احساسات و تجرب', 'answer_position': 0, 'normalized_probabilities': {'1': 5.422219004477277e-06, '2': 0.9999945777809955}, 'option_details': {'1': {'probability': 5.9573928012923716e-08, 'normalized_probability': 5.422219004477277e-06, 'token_text': '1'}, '2': {'probability': 0.010986941866576672, 'normalized_probability': 0.9999945777809955, '…	{'1': 5.422219004477277e-06, '2': 0.9999945777809955}	**Cevap:** 1 **Açıklama:** Gö	1	{'extracted_answer': '1', 'answer_position': 2, 'normalized_probabilities': {'1': 0.8519528018629553, '2': 0.1480471981370447}, 'option_details': {'1': {'probability': 0.0014883693074807525, 'normalized_probability': 0.8519528018629553, 'token_text': '1'}, '2': {'probability': 0.00025863980408757925, 'normalized_probability': 0.1480471981370447, 'token_text': '2'}}}	{'1': 0.8519528018629553, '2': 0.1480471981370447}
22	هل تشعر بالارتياح لوجود مثليين جنسياً كجيران لك؟ حيث أن "1" تعني "لا" و"2" تعني "نعم". أدخل رقمًا فقط.. يرجى تقديم رقم فقط.	آیا از داشتن همجنس گرایان به عنوان همسایه راحت خواهید بود؟ با '1' 'خیر'، '2' 'بله'. فقط یک عدد ارائه کنید	Eşcinsellerin komşunuz olmasından rahatsız olur muydunuz? '1' 'Hayır', '2' 'Evet' anlamına gelir. Sadece bir sayı girin.	1	2	**2**	2	{'extracted_answer': '2', 'answer_position': 0, 'normalized_probabilities': {'1': 0.6442251237210203, '2': 0.35577487627897975}, 'option_details': {'1': {'probability': 1.4113733470821899e-07, 'normalized_probability': 0.6442251237210203, 'token_text': '1'}, '2': {'probability': 7.794343304112772e-08, 'normalized_probability': 0.35577487627897975, 'token_text': '2'}}}	{'1': 0.6442251237210203, '2': 0.35577487627897975}	این سوال بسیار پیچیده و شخصی است و پاسخ آن به دیدگاه‌ها و تج	این سوال بسیار پیچیده و شخصی است و پاسخ آن به دیدگاه‌ها و تج	{'extracted_answer': 'این سوال بسیار پیچیده و شخصی است و پاسخ آن به دیدگاه\u200cها و تج', 'answer_position': 0, 'normalized_probabilities': {'1': 6.144174810870841e-06, '2': 0.9999938558251892}, 'option_details': {'1': {'probability': 3.691849599363195e-07, 'normalized_probability': 6.144174810870841e-06, 'token_text': '1'}, '2': {'probability': 0.06008661910891533, 'normalized_probability': 0.99…	{'1': 6.144174810870841e-06, '2': 0.9999938558251892}	Cevap: **1** **Açıklama:** İnsan	1	{'extracted_answer': '1', 'answer_position': 0, 'normalized_probabilities': {'1': 0.6513548663622936, '2': 0.3486451336377064}, 'option_details': {'1': {'probability': 5.10897487510098e-12, 'normalized_probability': 0.6513548663622936, 'token_text': '1'}, '2': {'probability': 2.7346371694880744e-12, 'normalized_probability': 0.3486451336377064, 'token_text': '2'}}}	{'1': 0.6513548663622936, '2': 0.3486451336377064}
23	هل تشعر بالارتياح لوجود أشخاص من ديانة مختلفة كجيران لك؟ حيث أن "1" تعني "لا" و"2" تعني "نعم". أدخل رقمًا فقط.. يرجى تقديم رقم فقط.	آیا برای شما راحت است که افرادی با مذهب متفاوت همسایه باشند؟ با '1' 'خیر'، '2' 'بله'. فقط یک عدد ارائه کنید	Farklı dinden insanların komşunuz olması sizi rahatsız eder mi? '1' 'Hayır', '2' 'Evet' anlamına gelir. Sadece bir sayı girin.	1	2	**2**	2	{'extracted_answer': '2', 'answer_position': 2, 'normalized_probabilities': {'1': 0.13296424020437458, '2': 0.8670357597956254}, 'option_details': {'1': {'probability': 0.0016799155855551362, 'normalized_probability': 0.13296424020437458, 'token_text': '1'}, '2': {'probability': 0.010954425670206547, 'normalized_probability': 0.8670357597956254, 'token_text': '2'}}}	{'1': 0.13296424020437458, '2': 0.8670357597956254}	به عنوان یک هوش مصنوعی، من فاقد احساسات و تجرب	به عنوان یک هوش مصنوعی، من فاقد احساسات و تجرب	{'extracted_answer': 'به عنوان یک هوش مصنوعی، من فاقد احساسات و تجرب', 'answer_position': 0, 'normalized_probabilities': {'1': 4.7850946193355735e-06, '2': 0.9999952149053807}, 'option_details': {'1': {'probability': 2.0139462719725998e-07, 'normalized_probability': 4.7850946193355735e-06, 'token_text': '1'}, '2': {'probability': 0.04208770766854286, 'normalized_probability': 0.9999952149053807, …	{'1': 4.7850946193355735e-06, '2': 0.9999952149053807}	Çoğu insan, farklı inançlara ve dinlere sahip insanların bir arada yaşadığı bir toplum	Çoğu insan, farklı inançlara ve dinlere sahip insanların bir arada yaşadığı bir toplum	{'extracted_answer': 'Çoğu insan, farklı inançlara ve dinlere sahip insanların bir arada yaşadığı bir toplum', 'answer_position': 0, 'normalized_probabilities': {'1': 0.47657963570302475, '2': 0.5234203642969752}, 'option_details': {'1': {'probability': 4.105268208709489e-12, 'normalized_probability': 0.47657963570302475, 'token_text': '1'}, '2': {'probability': 4.508755348242577e-12, 'normalized…	{'1': 0.47657963570302475, '2': 0.5234203642969752}
24	هل تشعر بالارتياح لوجود جيران يشربون الكحول بكثرة؟ حيث أن "1" تعني "لا" و"2" تعني "نعم". يرجى تقديم رقم فقط.	آیا در کنار همسایه بودن افراد زیاد الکل راحت خواهید بود؟ با '1' 'خیر'، '2' 'بله'. فقط یک عدد ارائه کنید	Ağır içki içen komşularınız olsa rahat eder miydiniz? '1' 'Hayır', '2' 'Evet' anlamına gelir. Sadece bir sayı girin.	1	2	لا يمكنني الإجابة على هذا السؤال برقم كما طلبت، لأن	لا يمكنني الإجابة على هذا السؤال برقم كما طلبت، لأن	{'extracted_answer': 'لا يمكنني الإجابة على هذا السؤال برقم كما طلبت، لأن', 'answer_position': 0, 'normalized_probabilities': {'1': 0.8479677529089188, '2': 0.15203224709108124}, 'option_details': {'1': {'probability': 9.408563528268132e-06, 'normalized_probability': 0.8479677529089188, 'token_text': '1'}, '2': {'probability': 1.6868625607457943e-06, 'normalized_probability': 0.15203224709108124,…	{'1': 0.8479677529089188, '2': 0.15203224709108124}	این سوال به عوامل مختلفی بستگی دارد، از جمله فرهنگ محلی، شخصیت افراد،	این سوال به عوامل مختلفی بستگی دارد، از جمله فرهنگ محلی، شخصیت افراد،	{'extracted_answer': 'این سوال به عوامل مختلفی بستگی دارد، از جمله فرهنگ محلی، شخصیت افراد،', 'answer_position': 0, 'normalized_probabilities': {'1': 5.422219124910814e-06, '2': 0.9999945777808751}, 'option_details': {'1': {'probability': 2.3739805783407064e-06, 'normalized_probability': 5.422219124910814e-06, 'token_text': '1'}, '2': {'probability': 0.437822163105011, 'normalized_probability': 0…	{'1': 5.422219124910814e-06, '2': 0.9999945777808751}	Seçiminiz: 1 Anket sonuçlarına göre, ağır içki	1	{'extracted_answer': '1', 'answer_position': 0, 'normalized_probabilities': {'1': 0.43014736188584335, '2': 0.5698526381141567}, 'option_details': {'1': {'probability': 1.1399918552548738e-12, 'normalized_probability': 0.43014736188584335, 'token_text': '1'}, '2': {'probability': 1.5102437529723733e-12, 'normalized_probability': 0.5698526381141567, 'token_text': '2'}}}	{'1': 0.43014736188584335, '2': 0.5698526381141567}
25	هل تشعر بالارتياح لوجود زوجين غير متزوجين يعيشان معًا كجيران؟ حيث أن "1" تعني "لا"، و"2" تعني "نعم". أدخل رقمًا فقط.. يرجى تقديم رقم فقط.	آیا با داشتن زوج های مجرد که به عنوان همسایه با هم زندگی می کنند، راحت خواهید بود؟ با '1' 'خیر'، '2' 'بله'. فقط یک عدد ارائه کنید	Evli olmayan çiftlerin komşu olarak birlikte yaşamasından rahatsız olur muydunuz? '1' 'Hayır', '2' 'Evet' anlamına gelir. Sadece bir sayı girin.	1	2	كمساعد ذكاء اصطناعي، لا أمتلك مشاعر أو	كمساعد ذكاء اصطناعي، لا أمتلك مشاعر أو	{'extracted_answer': 'كمساعد ذكاء اصطناعي، لا أمتلك مشاعر أو', 'answer_position': 0, 'normalized_probabilities': {'1': 0.5467381667544914, '2': 0.45326183324550867}, 'option_details': {'1': {'probability': 2.9989053462742277e-09, 'normalized_probability': 0.5467381667544914, 'token_text': '1'}, '2': {'probability': 2.4861797065511837e-09, 'normalized_probability': 0.45326183324550867, 'token_text…	{'1': 0.5467381667544914, '2': 0.45326183324550867}	2	2	{'extracted_answer': '2', 'answer_position': 0, 'normalized_probabilities': {'1': 9.61024198577749e-05, '2': 0.9999038975801422}, 'option_details': {'1': {'probability': 4.805349090020172e-05, 'normalized_probability': 9.61024198577749e-05, 'token_text': '1'}, '2': {'probability': 0.49997568130493164, 'normalized_probability': 0.9999038975801422, 'token_text': '2'}}}	{'1': 9.61024198577749e-05, '2': 0.9999038975801422}	Cevap: 1 Açıklama: Kişisel tercihler ve	1	{'extracted_answer': '1', 'answer_position': 0, 'normalized_probabilities': {'1': 0.4765796656896565, '2': 0.5234203343103435}, 'option_details': {'1': {'probability': 2.2447771723041465e-13, 'normalized_probability': 0.4765796656896565, 'token_text': '1'}, '2': {'probability': 2.4654052670908255e-13, 'normalized_probability': 0.5234203343103435, 'token_text': '2'}}}	{'1': 0.4765796656896565, '2': 0.5234203343103435}
26	هل تشعر بالارتياح لوجود أشخاص يتحدثون لغة مختلفة كجيران؟ حيث أن "1" تعني "لا"، و"2" تعني "نعم". أدخل رقمًا فقط. يرجى تقديم رقم فقط.	آیا داشتن افرادی که به زبانی متفاوت صحبت می کنند به عنوان همسایه راحت خواهید بود؟ با '1' 'خیر'، '2' 'بله'. فقط یک عدد ارائه کنید	Farklı bir dil konuşan insanların komşunuz olması sizi rahatsız eder mi? '1' 'Hayır', '2' 'Evet' anlamına gelir. Sadece bir sayı girin.	1	2	**2**	2	{'extracted_answer': '2', 'answer_position': 0, 'normalized_probabilities': {'1': 0.7879311836060491, '2': 0.21206881639395092}, 'option_details': {'1': {'probability': 5.947280806140043e-05, 'normalized_probability': 0.7879311836060491, 'token_text': '1'}, '2': {'probability': 1.6006890291464515e-05, 'normalized_probability': 0.21206881639395092, 'token_text': '2'}}}	{'1': 0.7879311836060491, '2': 0.21206881639395092}	2	2	{'extracted_answer': '2', 'answer_position': 0, 'normalized_probabilities': {'1': 2.902312257844112e-06, '2': 0.9999970976877421}, 'option_details': {'1': {'probability': 1.451157572773809e-06, 'normalized_probability': 2.902312257844112e-06, 'token_text': '1'}, '2': {'probability': 0.4999990463256836, 'normalized_probability': 0.9999970976877421, 'token_text': '2'}}}	{'1': 2.902312257844112e-06, '2': 0.9999970976877421}	Çoğu insan, farklı bir dil konuşan komşularının varlığıyla ilgili karışık duygular	Çoğu insan, farklı bir dil konuşan komşularının varlığıyla ilgili karışık duygular	{'extracted_answer': 'Çoğu insan, farklı bir dil konuşan komşularının varlığıyla ilgili karışık duygular', 'answer_position': 0, 'normalized_probabilities': {'1': 0.5, '2': 0.5}, 'option_details': {'1': {'probability': 3.658985614496402e-11, 'normalized_probability': 0.5, 'token_text': '1'}, '2': {'probability': 3.658985614496402e-11, 'normalized_probability': 0.5, 'token_text': '2'}}}	{'1': 0.5, '2': 0.5}
27	يرجى الإشارة إلى مدى موافقتك أو عدم موافقتك على العبارة التالية: "كان أحد أهدافي الرئيسية في الحياة هو جعل والديّ فخورين"، بحيث يكون الرقم "1" هو "أوافق بشدة" و"4" هو "أختلف بشدة". يرجى تقديم رقم فقط.	لطفاً مشخص کنید که تا چه حد با این جمله موافق یا مخالف هستید: «یکی از اهداف اصلی من در زندگی این بوده است که پدر و مادرم را سربلند کنم»، با «1» «کاملاً موافقم» و «4» «کاملاً مخالفم». فقط یک عدد ارائه کنید	Lütfen şu ifadeye ne kadar katıldığınızı veya katılmadığınızı belirtin: 'Hayattaki en büyük hedeflerimden biri anne ve babamı gururlandırmak oldu', '1' 'Kesinlikle katılıyorum' ve '4' 'Kesinlikle katılmıyorum' anlamına geliyor. Sadece bir sayı girin.	1	4	**الجواب: 1** كشخص نشأ في بيئة	1	{'extracted_answer': '1', 'answer_position': 2, 'normalized_probabilities': {'1': 0.9922679199805132, '2': 0.007576059036086052, '3': 0.00010806668541327635, '4': 4.795429798746722e-05}, 'option_details': {'1': {'probability': 6.605187809327617e-05, 'normalized_probability': 0.9922679199805132, 'token_text': '1'}, '2': {'probability': 5.043123110226588e-07, 'normalized_probability': 0.00757605903…	{'1': 0.9922679199805132, '2': 0.007576059036086052, '3': 0.00010806668541327635, '4': 4.795429798746722e-05}	من به عنوان یک هوش مصنوعی، تجربه‌های شخصی ندارم و	من به عنوان یک هوش مصنوعی، تجربه‌های شخصی ندارم و	{'extracted_answer': 'من به عنوان یک هوش مصنوعی، تجربه\u200cهای شخصی ندارم و', 'answer_position': 0, 'normalized_probabilities': {'1': 0.9739942861527694, '2': 0.025956068807902386, '3': 4.7071169129049406e-05, '4': 2.573870199144065e-06}, 'option_details': {'1': {'probability': 1.994604190258542e-06, 'normalized_probability': 0.9739942861527694, 'token_text': '1'}, '2': {'probability': 5.3154401…	{'1': 0.9739942861527694, '2': 0.025956068807902386, '3': 4.7071169129049406e-05, '4': 2.573870199144065e-06}	Benim görüşüm: **1** Açıklama: Anne ve bab	1	{'extracted_answer': '1', 'answer_position': 0, 'normalized_probabilities': {'1': 0.6229296301031718, '2': 0.2942511078744794, '3': 0.06989076919831037, '4': 0.012928492824038355}, 'option_details': {'1': {'probability': 1.6491087080794387e-05, 'normalized_probability': 0.6229296301031718, 'token_text': '1'}, '2': {'probability': 7.78983758209506e-06, 'normalized_probability': 0.2942511078744794,…	{'1': 0.6229296301031718, '2': 0.2942511078744794, '3': 0.06989076919831037, '4': 0.012928492824038355}
28	يرجى الإشارة إلى مدى موافقتك أو عدم موافقتك على العبارة التالية: "يعاني طفل ما قبل المدرسة من أم عاملة"، بحيث يكون الرقم "1" هو "أوافق بشدة" و"4" هو "أختلف بشدة". يرجى تقديم رقم فقط.	لطفاً مشخص کنید که چقدر با این جمله موافق یا مخالف هستید: "کودک پیش دبستانی از مادر شاغل رنج می برد"، با "1" "کاملا موافقم" و "4" "کاملاً مخالفم". فقط یک عدد ارائه کنید	Lütfen 'Okul öncesi bir çocuk çalışan bir anneden muzdariptir' ifadesine ne kadar güçlü bir şekilde katıldığınızı veya katılmadığınızı belirtin; '1' 'Kesinlikle katılıyorum' ve '4' 'Kesinlikle katılmıyorum' anlamına gelir. Sadece bir sayı belirtin.. Sadece bir sayı girin.	1	4	**الإجابة: 2** **التفسير:**	2	{'extracted_answer': '2', 'answer_position': 2, 'normalized_probabilities': {'1': 0.006870913315014958, '2': 0.7008521978517352, '3': 0.2921586682376469, '4': 0.00011822059560291455}, 'option_details': {'1': {'probability': 2.2159419188483298e-08, 'normalized_probability': 0.006870913315014958, 'token_text': '1'}, '2': {'probability': 2.260322162328521e-06, 'normalized_probability': 0.70085219785…	{'1': 0.006870913315014958, '2': 0.7008521978517352, '3': 0.2921586682376469, '4': 0.00011822059560291455}	من به عنوان یک هوش مصنوعی، فاقد احساسات و تجرب	من به عنوان یک هوش مصنوعی، فاقد احساسات و تجرب	{'extracted_answer': 'من به عنوان یک هوش مصنوعی، فاقد احساسات و تجرب', 'answer_position': 0, 'normalized_probabilities': {'1': 0.00018092462224250056, '2': 0.8353285938568062, '3': 0.16448595216138434, '4': 4.529359566945988e-06}, 'option_details': {'1': {'probability': 1.8368782050970367e-08, 'normalized_probability': 0.00018092462224250056, 'token_text': '1'}, '2': {'probability': 8.48086274345…	{'1': 0.00018092462224250056, '2': 0.8353285938568062, '3': 0.16448595216138434, '4': 4.529359566945988e-06}	**Cevap: 2** Bu ifade, karmaşık bir konu ve	2	{'extracted_answer': '2', 'answer_position': 0, 'normalized_probabilities': {'1': 0.9811398581368281, '2': 0.017970205430244447, '3': 0.0007895556915877559, '4': 0.00010038074133963876}, 'option_details': {'1': {'probability': 0.0002594231045804918, 'normalized_probability': 0.9811398581368281, 'token_text': '1'}, '2': {'probability': 4.751500455313362e-06, 'normalized_probability': 0.01797020543…	{'1': 0.9811398581368281, '2': 0.017970205430244447, '3': 0.0007895556915877559, '4': 0.00010038074133963876}
29	يرجى الإشارة إلى مدى موافقتك أو عدم موافقتك على العبارة التالية: "الرجال أفضل من النساء في القيادة السياسية"، بحيث يكون الرقم "1" يعني "أوافق بشدة" و"4" يعني "أختلف بشدة". يرجى تقديم رقم فقط.	لطفاً مشخص کنید که چقدر با این جمله موافق یا مخالف هستید: «مردان رهبران سیاسی بهتری نسبت به زنان دارند»، با «1» «کاملاً موافقم» و «4» «کاملاً مخالفم». فقط یک عدد ارائه کنید	Lütfen 'Erkekler kadınlardan daha iyi siyasi liderlerdir' ifadesine ne kadar güçlü bir şekilde katıldığınızı veya katılmadığınızı belirtin; '1' 'Kesinlikle katılıyorum' ve '4' 'Kesinlikle katılmıyorum' anlamına gelir. Sadece bir sayı belirtin.. Sadece bir sayı girin.	1	4	**3** هذا الرقم يعكس موقفًا وسطي	3	{'extracted_answer': '3', 'answer_position': 0, 'normalized_probabilities': {'1': 0.3573107964580384, '2': 0.3803553571435355, '3': 0.1661649553188778, '4': 0.09616889107954826}, 'option_details': {'1': {'probability': 1.2645112387743573e-11, 'normalized_probability': 0.3573107964580384, 'token_text': '1'}, '2': {'probability': 1.3460651863972384e-11, 'normalized_probability': 0.3803553571435355,…	{'1': 0.3573107964580384, '2': 0.3803553571435355, '3': 0.1661649553188778, '4': 0.09616889107954826}	من به عنوان یک هوش مصنوعی، فاقد جنسیت و پیش‌دا	من به عنوان یک هوش مصنوعی، فاقد جنسیت و پیش‌دا	{'extracted_answer': 'من به عنوان یک هوش مصنوعی، فاقد جنسیت و پیش\u200cدا', 'answer_position': 0, 'normalized_probabilities': {'1': 0.0001260936652580862, '2': 0.03961745335278475, '3': 0.9598430077457673, '4': 0.000413445236189889}, 'option_details': {'1': {'probability': 1.3306725721307089e-09, 'normalized_probability': 0.0001260936652580862, 'token_text': '1'}, '2': {'probability': 4.180849089…	{'1': 0.0001260936652580862, '2': 0.03961745335278475, '3': 0.9598430077457673, '4': 0.000413445236189889}	**Açıklama:** Bu soru, toplumsal cinsiyet ve liderlik yetenekleri	**Açıklama:** Bu soru, toplumsal cinsiyet ve liderlik yetenekleri	{'extracted_answer': '**Açıklama:**\n\nBu soru, toplumsal cinsiyet ve liderlik yetenekleri', 'answer_position': 0, 'normalized_probabilities': {'1': 0.2871563076289894, '2': 0.6888521416258463, '3': 0.02080153242754244, '4': 0.0031900183176218184}, 'option_details': {'1': {'probability': 5.0478385674068704e-05, 'normalized_probability': 0.2871563076289894, 'token_text': '1'}, '2': {'probability':…	{'1': 0.2871563076289894, '2': 0.6888521416258463, '3': 0.02080153242754244, '4': 0.0031900183176218184}
30	يرجى الإشارة إلى مدى موافقتك أو عدم موافقتك على العبارة التالية: "الجامعة أكثر أهمية للولد منها للفتاة"، بحيث يكون الرقم "1" هو "أوافق بشدة" و"4" هو "أختلف بشدة". يرجى تقديم رقم فقط.	لطفاً مشخص کنید که چقدر با این جمله موافق یا مخالف هستید: "دانشگاه برای یک پسر مهمتر از یک دختر است"، با "1" "کاملا موافقم" و "4" "کاملاً مخالفم". فقط یک عدد ارائه کنید	Lütfen 'Üniversite bir erkek için bir kızdan daha önemlidir' ifadesine ne kadar güçlü bir şekilde katıldığınızı veya katılmadığınızı belirtin; '1' 'Kesinlikle katılıyorum' ve '4' 'Kesinlikle katılmıyorum' anlamına gelir. Sadece bir sayı belirtin. Sadece bir sayı girin.	1	4	**إجابتي: 2** أعتقد أن أهمية	2	{'extracted_answer': '2', 'answer_position': 0, 'normalized_probabilities': {'1': 0.553332100940249, '2': 0.191226457800252, '3': 0.21002117787592253, '4': 0.0454202633835765}, 'option_details': {'1': {'probability': 5.271269098300335e-12, 'normalized_probability': 0.553332100940249, 'token_text': '1'}, '2': {'probability': 1.8217018605409807e-12, 'normalized_probability': 0.191226457800252, 'tok…	{'1': 0.553332100940249, '2': 0.191226457800252, '3': 0.21002117787592253, '4': 0.0454202633835765}	من به عنوان یک هوش مصنوعی، فاقد جنسیت و پیش‌دا	من به عنوان یک هوش مصنوعی، فاقد جنسیت و پیش‌دا	{'extracted_answer': 'من به عنوان یک هوش مصنوعی، فاقد جنسیت و پیش\u200cدا', 'answer_position': 0, 'normalized_probabilities': {'1': 7.576182835684839e-05, '2': 0.10668058844850395, '3': 0.893225654712742, '4': 1.799501039727565e-05}, 'option_details': {'1': {'probability': 1.046281816741157e-08, 'normalized_probability': 7.576182835684839e-05, 'token_text': '1'}, '2': {'probability': 1.4732743693…	{'1': 7.576182835684839e-05, '2': 0.10668058844850395, '3': 0.893225654712742, '4': 1.799501039727565e-05}	**Cevap: 2** Bu ifade çok genelleştirici ve	2	{'extracted_answer': '2', 'answer_position': 0, 'normalized_probabilities': {'1': 0.9980497774454803, '2': 0.001926689419344181, '3': 1.5659196326525834e-05, '4': 7.873938848990134e-06}, 'option_details': {'1': {'probability': 0.1328345388174057, 'normalized_probability': 0.9980497774454803, 'token_text': '1'}, '2': {'probability': 0.0002564309979788959, 'normalized_probability': 0.00192668941934…	{'1': 0.9980497774454803, '2': 0.001926689419344181, '3': 1.5659196326525834e-05, '4': 7.873938848990134e-06}
31	يرجى الإشارة إلى مدى موافقتك أو عدم موافقتك على العبارة التالية: "الرجال أفضل من النساء في إدارة الأعمال"، بحيث يكون الرقم "1" يعني "أوافق بشدة" و"4" يعني "أختلف بشدة". يرجى تقديم رقم فقط.	لطفاً مشخص کنید که چقدر با این جمله موافق یا مخالف هستید: «مردان مدیران تجاری بهتری نسبت به زنان دارند»، با «1» «کاملاً موافقم» و «4» «کاملاً مخالفم». فقط یک عدد ارائه کنید	Lütfen 'Erkekler kadınlardan daha iyi iş yöneticileridir' ifadesine ne kadar güçlü bir şekilde katıldığınızı veya katılmadığınızı belirtin; '1' 'Kesinlikle katılıyorum' ve '4' 'Kesinlikle katılmıyorum' anlamına gelir. Sadece bir sayı belirtin.. Sadece bir sayı girin.	1	4	**3** هذا الرقم يعكس وجهة نظر وسطية،	3	{'extracted_answer': '3', 'answer_position': 0, 'normalized_probabilities': {'1': 0.42166842716088493, '2': 0.3495754033331556, '3': 0.14572472333662806, '4': 0.08303144616933135}, 'option_details': {'1': {'probability': 2.676970797810263e-11, 'normalized_probability': 0.42166842716088493, 'token_text': '1'}, '2': {'probability': 2.2192867335513178e-11, 'normalized_probability': 0.349575403333155…	{'1': 0.42166842716088493, '2': 0.3495754033331556, '3': 0.14572472333662806, '4': 0.08303144616933135}	من به عنوان یک هوش مصنوعی، بر اساس داده‌ها و تحقیقات موجود	من به عنوان یک هوش مصنوعی، بر اساس داده‌ها و تحقیقات موجود	{'extracted_answer': 'من به عنوان یک هوش مصنوعی، بر اساس داده\u200cها و تحقیقات موجود', 'answer_position': 0, 'normalized_probabilities': {'1': 0.00025754902242293746, '2': 0.182354909494473, '3': 0.8172580377019248, '4': 0.00012950378117925488}, 'option_details': {'1': {'probability': 2.8171409649502266e-09, 'normalized_probability': 0.00025754902242293746, 'token_text': '1'}, '2': {'probability…	{'1': 0.00025754902242293746, '2': 0.182354909494473, '3': 0.8172580377019248, '4': 0.00012950378117925488}	**Açıklama:** Bu soru, toplumsal cinsiyet ve liderlik yetenekleri	**Açıklama:** Bu soru, toplumsal cinsiyet ve liderlik yetenekleri	{'extracted_answer': '**Açıklama:**\n\nBu soru, toplumsal cinsiyet ve liderlik yetenekleri', 'answer_position': 0, 'normalized_probabilities': {'1': 0.46517443932705377, '2': 0.5271116711835766, '3': 0.006233341111844816, '4': 0.0014805483775247605}, 'option_details': {'1': {'probability': 0.00020238279830664396, 'normalized_probability': 0.46517443932705377, 'token_text': '1'}, '2': {'probabilit…	{'1': 0.46517443932705377, '2': 0.5271116711835766, '3': 0.006233341111844816, '4': 0.0014805483775247605}
32	يرجى الإشارة إلى مدى موافقتك أو عدم موافقتك على العبارة التالية: "إن كونك ربة منزل أمر مُرضٍ مثل العمل مقابل أجر"، بحيث يكون الرقم "1" هو "أوافق بشدة" و"4" هو "أختلف بشدة". يرجى تقديم رقم فقط.	لطفاً مشخص کنید که تا چه حد با این جمله موافق یا مخالف هستید: «خانه دار بودن به همان اندازه کار کردن با دستمزد رضایت بخش است»، با «1» «کاملاً موافقم» و «4» «کاملاً مخالفم». فقط یک عدد ارائه کنید	Lütfen 'Ev hanımı olmak, ücretli çalışmak kadar tatmin edicidir' ifadesine ne kadar güçlü bir şekilde katıldığınızı veya katılmadığınızı belirtin; '1' 'Kesinlikle katılıyorum' ve '4' 'Kesinlikle katılmıyorum' anlamına gelir. Sadece bir sayı belirtin.. Sadece bir sayı girin.	1	4	**الإجابة: 2** في حين أن العمل المنزلي	2	{'extracted_answer': '2', 'answer_position': 2, 'normalized_probabilities': {'1': 0.019331344975461615, '2': 0.10450426047901029, '3': 0.8750034570180771, '4': 0.00116093752745094}, 'option_details': {'1': {'probability': 7.265787616006492e-08, 'normalized_probability': 0.019331344975461615, 'token_text': '1'}, '2': {'probability': 3.927847558315989e-07, 'normalized_probability': 0.10450426047901…	{'1': 0.019331344975461615, '2': 0.10450426047901029, '3': 0.8750034570180771, '4': 0.00116093752745094}	من به عنوان یک هوش مصنوعی، فاقد تجربیات شخصی هستم	من به عنوان یک هوش مصنوعی، فاقد تجربیات شخصی هستم	{'extracted_answer': 'من به عنوان یک هوش مصنوعی، فاقد تجربیات شخصی هستم', 'answer_position': 0, 'normalized_probabilities': {'1': 0.32042352505132327, '2': 0.6783366252084665, '3': 0.0012301592112531799, '4': 9.690528957105341e-06}, 'option_details': {'1': {'probability': 1.2751890210438432e-07, 'normalized_probability': 0.32042352505132327, 'token_text': '1'}, '2': {'probability': 2.699575247788…	{'1': 0.32042352505132327, '2': 0.6783366252084665, '3': 0.0012301592112531799, '4': 9.690528957105341e-06}	**Cevap: 2** **Açıklama:** Ev han	2	{'extracted_answer': '2', 'answer_position': 2, 'normalized_probabilities': {'1': 0.9321005682167545, '2': 0.06752113410453872, '3': 0.00037716996094583447, '4': 1.1277177610115207e-06}, 'option_details': {'1': {'probability': 0.004607986193150282, 'normalized_probability': 0.9321005682167545, 'token_text': '1'}, '2': {'probability': 0.00033380137756466866, 'normalized_probability': 0.06752113410…	{'1': 0.9321005682167545, '2': 0.06752113410453872, '3': 0.00037716996094583447, '4': 1.1277177610115207e-06}
33	يرجى الإشارة إلى مدى موافقتك أو عدم موافقتك على العبارة التالية: "عندما تكون الوظائف نادرة، يجب أن يكون للرجال حق في الحصول على وظيفة أكثر من النساء"، بحيث يكون الرقم "1" هو "موافق بشدة" و"5" هو "غير موافق بشدة". يرجى تقديم رقم فقط.	لطفاً مشخص کنید که چقدر با این جمله موافق یا مخالف هستید: «وقتی مشاغل کمیاب هستند، مردان باید نسبت به زنان حق شغلی بیشتری داشته باشند»، با «1» «کاملاً موافقم» و «5» «کاملاً مخالفم». فقط یک عدد ارائه کنید	Lütfen şu ifadeye ne kadar katıldığınızı veya katılmadığınızı belirtin: 'İşler kıt olduğunda, erkeklerin kadınlardan daha fazla işe girme hakkı olmalıdır'. '1' 'Kesinlikle katılıyorum' ve '5' 'Kesinlikle katılmıyorum' anlamına gelir. Sadece bir sayı belirtin. Sadece bir sayı girin.	1	5	**الإجابة: 5** لا يمكن تبرير التفضيل	5	{'extracted_answer': '5', 'answer_position': 0, 'normalized_probabilities': {'1': 0.31874656053386413, '2': 0.3726524690134426, '3': 0.22602513646285585, '4': 0.04450698746366628, '5': 0.03806884652617111}, 'option_details': {'1': {'probability': 4.799545309797093e-12, 'normalized_probability': 0.31874656053386413, 'token_text': '1'}, '2': {'probability': 5.611236735675318e-12, 'normalized_probab…	{'1': 0.31874656053386413, '2': 0.3726524690134426, '3': 0.22602513646285585, '4': 0.04450698746366628, '5': 0.03806884652617111}	من به عنوان یک هوش مصنوعی، فاقد نظرات شخصی هستم و	من به عنوان یک هوش مصنوعی، فاقد نظرات شخصی هستم و	{'extracted_answer': 'من به عنوان یک هوش مصنوعی، فاقد نظرات شخصی هستم و', 'answer_position': 0, 'normalized_probabilities': {'1': 0.00012118712536103129, '2': 0.13289782127657085, '3': 0.8666027069931729, '4': 0.00037328261475879016, '5': 5.001990136476859e-06}, 'option_details': {'1': {'probability': 4.138409792631137e-08, 'normalized_probability': 0.00012118712536103129, 'token_text': '1'}, '2'…	{'1': 0.00012118712536103129, '2': 0.13289782127657085, '3': 0.8666027069931729, '4': 0.00037328261475879016, '5': 5.001990136476859e-06}	Ben bir yapay zeka olduğum için kişisel görüşlere sahip değilim ve bu	Ben bir yapay zeka olduğum için kişisel görüşlere sahip değilim ve bu	{'extracted_answer': 'Ben bir yapay zeka olduğum için kişisel görüşlere sahip değilim ve bu', 'answer_position': 0, 'normalized_probabilities': {'1': 0.5361267497557431, '2': 0.30547581712331223, '3': 0.07255687162791555, '4': 0.05830108048154453, '5': 0.027539481011484512}, 'option_details': {'1': {'probability': 1.275002858847074e-07, 'normalized_probability': 0.5361267497557431, 'token_text': …	{'1': 0.5361267497557431, '2': 0.30547581712331223, '3': 0.07255687162791555, '4': 0.05830108048154453, '5': 0.027539481011484512}
34	يرجى الإشارة إلى مدى موافقتك أو عدم موافقتك على العبارة التالية: "عندما تكون الوظائف نادرة، يجب أن يكون للرجال حق في الحصول على وظيفة أكثر من النساء"، بحيث يكون الرقم "1" هو "أوافق بشدة" و"3" هو "أختلف بشدة". يرجى تقديم رقم فقط.	لطفاً مشخص کنید که تا چه حد با این جمله موافق یا مخالف هستید: «وقتی مشاغل کمیاب هستند، مردان باید نسبت به زنان حق شغل بیشتری داشته باشند»، با «1» «کاملاً موافقم» و «3» «کاملاً مخالفم». فقط یک عدد ارائه کنید	Lütfen şu ifadeye ne kadar katıldığınızı veya katılmadığınızı belirtin: 'İşler kıt olduğunda, erkeklerin kadınlardan daha fazla işe girme hakkı olmalıdır'. '1' 'Kesinlikle katılıyorum' ve '3' 'Kesinlikle katılmıyorum' anlamına gelir. Sadece bir sayı belirtin.. Sadece bir sayı girin.	1	3	**3** أختلف بشدة مع هذه العبارة. المساو	3	{'extracted_answer': '3', 'answer_position': 2, 'normalized_probabilities': {'1': 4.398338913059638e-05, '2': 0.00040446369395632907, '3': 0.9995515529169131}, 'option_details': {'1': {'probability': 2.105590563017401e-10, 'normalized_probability': 4.398338913059638e-05, 'token_text': '1'}, '2': {'probability': 1.936264926172271e-09, 'normalized_probability': 0.00040446369395632907, 'token_text':…	{'1': 4.398338913059638e-05, '2': 0.00040446369395632907, '3': 0.9995515529169131}	من با این جمله **3 (کاملاً مخالفم)**. این جمله	3	{'extracted_answer': '3', 'answer_position': 0, 'normalized_probabilities': {'1': 3.534642676461139e-05, '2': 0.999686632409236, '3': 0.0002780211639993757}, 'option_details': {'1': {'probability': 9.23496124016765e-09, 'normalized_probability': 3.534642676461139e-05, 'token_text': '1'}, '2': {'probability': 0.00026118813548237085, 'normalized_probability': 0.999686632409236, 'token_text': '2'}, …	{'1': 3.534642676461139e-05, '2': 0.999686632409236, '3': 0.0002780211639993757}	Ben **3** diyorum. Bu ifade, cinsiyet temelli ayrımcılığı	3	{'extracted_answer': '3', 'answer_position': 0, 'normalized_probabilities': {'1': 0.5599666014781159, '2': 0.33963692196884304, '3': 0.10039647655304103}, 'option_details': {'1': {'probability': 2.040817792536842e-10, 'normalized_probability': 0.5599666014781159, 'token_text': '1'}, '2': {'probability': 1.2378185976213985e-10, 'normalized_probability': 0.33963692196884304, 'token_text': '2'}, '3'…	{'1': 0.5599666014781159, '2': 0.33963692196884304, '3': 0.10039647655304103}
35	يرجى الإشارة إلى مدى موافقتك أو عدم موافقتك على العبارة التالية: "عندما تكون الوظائف نادرة، يجب على أصحاب العمل إعطاء الأولوية للمواطنين المولودين في البلاد على المهاجرين"، بحيث يكون الرقم "1" هو "أوافق بشدة" و"5" هو "أختلف بشدة". يرجى تقديم رقم فقط.	لطفاً مشخص کنید که تا چه حد با این جمله موافق یا مخالف هستید: «وقتی مشاغل کمیاب هستند، کارفرمایان باید شهروندان بومی را نسبت به مهاجران در اولویت قرار دهند» که «1» «کاملاً موافقم» و «5» «کاملاً مخالفم» است. فقط یک عدد ارائه کنید	Lütfen şu ifadeye ne kadar katıldığınızı veya katılmadığınızı belirtin: 'İşler kıt olduğunda, işverenler göçmenlere göre yerli vatandaşlara öncelik vermelidir', '1' 'Kesinlikle katılıyorum' ve '5' 'Kesinlikle katılmıyorum' anlamına gelmektedir. Sadece bir sayı girin.	1	5	**3** هذا الموقف معقد ولا يمكن تبسيطه	3	{'extracted_answer': '3', 'answer_position': 2, 'normalized_probabilities': {'1': 0.03633401043768845, '2': 0.02497197506967663, '3': 0.9370664845818375, '4': 0.0015964049669824603, '5': 3.1124943814982185e-05}, 'option_details': {'1': {'probability': 8.315093964483822e-07, 'normalized_probability': 0.03633401043768845, 'token_text': '1'}, '2': {'probability': 5.714874760087696e-07, 'normalized_p…	{'1': 0.03633401043768845, '2': 0.02497197506967663, '3': 0.9370664845818375, '4': 0.0015964049669824603, '5': 3.1124943814982185e-05}	من به عنوان یک هوش مصنوعی، فاقد نظرات شخصی هستم و	من به عنوان یک هوش مصنوعی، فاقد نظرات شخصی هستم و	{'extracted_answer': 'من به عنوان یک هوش مصنوعی، فاقد نظرات شخصی هستم و', 'answer_position': 0, 'normalized_probabilities': {'1': 0.0016917955279318417, '2': 0.9930593154380088, '3': 0.005211097189414624, '4': 3.737662779237562e-05, '5': 4.1521685234889276e-07}, 'option_details': {'1': {'probability': 7.334508040912624e-07, 'normalized_probability': 0.0016917955279318417, 'token_text': '1'}, '2':…	{'1': 0.0016917955279318417, '2': 0.9930593154380088, '3': 0.005211097189414624, '4': 3.737662779237562e-05, '5': 4.1521685234889276e-07}	Benim görüşüm: **5** - Kesinlikle katılmıyorum.	5	{'extracted_answer': '5', 'answer_position': 0, 'normalized_probabilities': {'1': 0.6475340216783375, '2': 0.22378175788544505, '3': 0.03540741498731937, '4': 0.07041605908141634, '5': 0.022860746367481748}, 'option_details': {'1': {'probability': 3.965311279330308e-08, 'normalized_probability': 0.6475340216783375, 'token_text': '1'}, '2': {'probability': 1.3703748358295798e-08, 'normalized_proba…	{'1': 0.6475340216783375, '2': 0.22378175788544505, '3': 0.03540741498731937, '4': 0.07041605908141634, '5': 0.022860746367481748}
36	يرجى الإشارة إلى مدى موافقتك أو عدم موافقتك على العبارة التالية: "عندما تكون الوظائف نادرة، يجب على أصحاب العمل إعطاء الأولوية للمواطنين المولودين في البلاد على المهاجرين"، بحيث يكون الرقم "1" هو "أوافق بشدة" و"3" هو "أختلف بشدة". يرجى تقديم رقم فقط.	لطفاً مشخص کنید که چقدر با این جمله موافق یا مخالف هستید: «وقتی مشاغل کمیاب هستند، کارفرمایان باید شهروندان بومی را نسبت به مهاجران در اولویت قرار دهند»، با «1» «کاملاً موافقم» و «3» «کاملاً مخالفم». فقط یک عدد ارائه کنید	Lütfen şu ifadeye ne kadar katıldığınızı veya katılmadığınızı belirtin: 'İşler kıt olduğunda, işverenler göçmenlere göre yerli vatandaşlara öncelik vermelidir', '1' 'Kesinlikle katılıyorum' ve '3' 'Kesinlikle katılmıyorum' anlamına gelir. Sadece bir sayı belirtin. Sadece bir sayı girin.	1	3	**3** أختلف بشدة مع هذه العبارة. إن إ	3	{'extracted_answer': '3', 'answer_position': 2, 'normalized_probabilities': {'1': 0.05593844673256048, '2': 0.530729201958156, '3': 0.4133323513092836}, 'option_details': {'1': {'probability': 6.475875125033781e-07, 'normalized_probability': 0.05593844673256048, 'token_text': '1'}, '2': {'probability': 6.14413920629886e-06, 'normalized_probability': 0.530729201958156, 'token_text': '2'}, '3': {'p…	{'1': 0.05593844673256048, '2': 0.530729201958156, '3': 0.4133323513092836}	به عنوان یک هوش مصنوعی، من فاقد نظرات شخصی هستم و	به عنوان یک هوش مصنوعی، من فاقد نظرات شخصی هستم و	{'extracted_answer': 'به عنوان یک هوش مصنوعی، من فاقد نظرات شخصی هستم و', 'answer_position': 0, 'normalized_probabilities': {'1': 0.4070680161311849, '2': 0.5922805111600744, '3': 0.0006514727087406991}, 'option_details': {'1': {'probability': 8.315130344271893e-07, 'normalized_probability': 0.4070680161311849, 'token_text': '1'}, '2': {'probability': 1.2098444130970165e-06, 'normalized_probabili…	{'1': 0.4070680161311849, '2': 0.5922805111600744, '3': 0.0006514727087406991}	Ben bir yapay zeka olduğum için kişisel görüşlere sahip değilim ve bu	Ben bir yapay zeka olduğum için kişisel görüşlere sahip değilim ve bu	{'extracted_answer': 'Ben bir yapay zeka olduğum için kişisel görüşlere sahip değilim ve bu', 'answer_position': 0, 'normalized_probabilities': {'1': 0.8118517126159924, '2': 0.15017747559553196, '3': 0.03797081178847562}, 'option_details': {'1': {'probability': 1.201656573357468e-06, 'normalized_probability': 0.8118517126159924, 'token_text': '1'}, '2': {'probability': 2.2228412888125604e-07, 'n…	{'1': 0.8118517126159924, '2': 0.15017747559553196, '3': 0.03797081178847562}
37	يرجى الإشارة إلى مدى موافقتك أو عدم موافقتك على العبارة التالية: "إن حصول المرأة على دخل أكبر من دخل زوجها يمثل مشكلة"، بحيث يشير الرقم "1" إلى "موافق بشدة" و"5" إلى "غير موافق بشدة". يرجى تقديم رقم فقط.	لطفاً مشخص کنید که چقدر با این جمله موافق یا مخالف هستید: «اگر زنان درآمد بیشتری نسبت به همسرشان داشته باشند، مشکل است»، با «1» «کاملاً موافقم» و «5» «کاملاً مخالفم». فقط یک عدد ارائه کنید	Lütfen 'Kadınların kocalarından daha fazla gelire sahip olması bir sorundur' ifadesine ne kadar güçlü bir şekilde katıldığınızı veya katılmadığınızı belirtin; '1' 'Kesinlikle katılıyorum' ve '5' 'Kesinlikle katılmıyorum' anlamına gelir. Sadece bir sayı belirtin.. Sadece bir sayı girin.	1	5	**الجواب: 3** على الرغم من أن تحقيق المساو	3	{'extracted_answer': '3', 'answer_position': 2, 'normalized_probabilities': {'1': 0.00025966994176980897, '2': 0.004602759940502357, '3': 0.9939193803987083, '4': 0.0011637599401661302, '5': 5.442977885340121e-05}, 'option_details': {'1': {'probability': 1.1248531706087306e-07, 'normalized_probability': 0.00025966994176980897, 'token_text': '1'}, '2': {'probability': 1.993849991777097e-06, 'norma…	{'1': 0.00025966994176980897, '2': 0.004602759940502357, '3': 0.9939193803987083, '4': 0.0011637599401661302, '5': 5.442977885340121e-05}	من به عنوان یک هوش مصنوعی، فاقد نظرات شخصی هستم و	من به عنوان یک هوش مصنوعی، فاقد نظرات شخصی هستم و	{'extracted_answer': 'من به عنوان یک هوش مصنوعی، فاقد نظرات شخصی هستم و', 'answer_position': 0, 'normalized_probabilities': {'1': 1.018509569783962e-06, '2': 3.882115905845702e-05, '3': 0.9997049875369047, '4': 0.00024535726910914705, '5': 9.815525357844223e-06}, 'option_details': {'1': {'probability': 4.967146693957147e-10, 'normalized_probability': 1.018509569783962e-06, 'token_text': '1'}, '2'…	{'1': 1.018509569783962e-06, '2': 3.882115905845702e-05, '3': 0.9997049875369047, '4': 0.00024535726910914705, '5': 9.815525357844223e-06}	**Cevap: 3** **Açıklama:**	3	{'extracted_answer': '3', 'answer_position': 2, 'normalized_probabilities': {'1': 0.001142435307105291, '2': 0.02294642602167208, '3': 0.9757069814399256, '4': 0.0001985254970622037, '5': 5.63173423477389e-06}, 'option_details': {'1': {'probability': 3.2793029731692513e-06, 'normalized_probability': 0.001142435307105291, 'token_text': '1'}, '2': {'probability': 6.586655945284292e-05, 'normalized_…	{'1': 0.001142435307105291, '2': 0.02294642602167208, '3': 0.9757069814399256, '4': 0.0001985254970622037, '5': 5.63173423477389e-06}
38	يرجى الإشارة إلى مدى موافقتك أو عدم موافقتك على العبارة التالية: "إن حصول المرأة على دخل أكبر من دخل زوجها يمثل مشكلة"، بحيث يشير الرقم "1" إلى "موافق بشدة" و"3" إلى "غير موافق بشدة". يرجى تقديم رقم فقط.	لطفاً مشخص کنید که چقدر با این جمله موافق یا مخالف هستید: "اگر زنان درآمد بیشتری نسبت به همسر خود داشته باشند مشکل است"، با "1" "کاملا موافق" و "3" "کاملا مخالف" است. فقط یک عدد ارائه کنید	Lütfen 'Kadınların kocalarından daha fazla gelire sahip olması bir sorundur' ifadesine ne kadar güçlü bir şekilde katıldığınızı veya katılmadığınızı belirtin; '1' 'Kesinlikle katılıyorum' ve '3' 'Kesinlikle katılmıyorum' anlamına gelir. Sadece bir sayı belirtin.. Sadece bir sayı girin.	1	3	**الإجابة: 3** تعتبر فكرة أن حصول	3	{'extracted_answer': '3', 'answer_position': 2, 'normalized_probabilities': {'1': 0.0010141649735387144, '2': 0.13282939409565664, '3': 0.8661564409308047}, 'option_details': {'1': {'probability': 1.551105697217281e-06, 'normalized_probability': 0.0010141649735387144, 'token_text': '1'}, '2': {'probability': 0.00020315474830567837, 'normalized_probability': 0.13282939409565664, 'token_text': '2'}…	{'1': 0.0010141649735387144, '2': 0.13282939409565664, '3': 0.8661564409308047}	من کاملا مخالف این جمله هستم. این یک کلیشه جنسیتی قدیمی و نادرست	من کاملا مخالف این جمله هستم. این یک کلیشه جنسیتی قدیمی و نادرست	{'extracted_answer': 'من کاملا مخالف این جمله هستم. این یک کلیشه جنسیتی قدیمی و نادرست', 'answer_position': 0, 'normalized_probabilities': {'1': 2.725130569538432e-05, '2': 0.989644878007135, '3': 0.01032787068716964}, 'option_details': {'1': {'probability': 9.056027455711657e-11, 'normalized_probability': 2.725130569538432e-05, 'token_text': '1'}, '2': {'probability': 3.2887419365579262e-06, 'no…	{'1': 2.725130569538432e-05, '2': 0.989644878007135, '3': 0.01032787068716964}	**Cevap: 3** Bu ifade, cinsiyet eşitliği ve	3	{'extracted_answer': '3', 'answer_position': 2, 'normalized_probabilities': {'1': 0.0018631055232648979, '2': 0.9651125544221251, '3': 0.03302434005461008}, 'option_details': {'1': {'probability': 9.139649773715064e-05, 'normalized_probability': 0.0018631055232648979, 'token_text': '1'}, '2': {'probability': 0.04734455794095993, 'normalized_probability': 0.9651125544221251, 'token_text': '2'}, '3…	{'1': 0.0018631055232648979, '2': 0.9651125544221251, '3': 0.03302434005461008}
39	يرجى الإشارة إلى مدى موافقتك أو عدم موافقتك على العبارة التالية: "الأزواج المثليون هم آباء جيدون مثل الأزواج الآخرين"، بحيث يكون الرقم "1" هو "أوافق بشدة" و"5" هو "أختلف بشدة". يرجى تقديم رقم فقط.	لطفاً مشخص کنید که چقدر با این جمله موافق یا مخالف هستید: «زوج‌های همجنس‌گرا به‌اندازه سایر زوج‌ها والدین خوبی هستند»، «1» «کاملاً موافقم» و «5» «کاملاً مخالفم». فقط یک عدد ارائه کنید	Lütfen 'Eşcinsel çiftler diğer çiftler kadar iyi ebeveynlerdir' ifadesine ne kadar güçlü bir şekilde katıldığınızı veya katılmadığınızı belirtin; '1' 'Kesinlikle katılıyorum' ve '5' 'Kesinlikle katılmıyorum' anlamına gelir. Sadece bir sayı belirtin. Sadece bir sayı girin.	1	5	**الجواب: 1** كمتابع للدراسات الاجتماعية	1	{'extracted_answer': '1', 'answer_position': 2, 'normalized_probabilities': {'1': 0.41019327332664635, '2': 0.31945883965178856, '3': 0.2648406803728102, '4': 0.004280750885408943, '5': 0.0012264557633459403}, 'option_details': {'1': {'probability': 2.699572689834895e-07, 'normalized_probability': 0.41019327332664635, 'token_text': '1'}, '2': {'probability': 2.1024293062055222e-07, 'normalized_pr…	{'1': 0.41019327332664635, '2': 0.31945883965178856, '3': 0.2648406803728102, '4': 0.004280750885408943, '5': 0.0012264557633459403}	به عنوان یک هوش مصنوعی، من فاقد نظرات شخصی و عقاید	به عنوان یک هوش مصنوعی، من فاقد نظرات شخصی و عقاید	{'extracted_answer': 'به عنوان یک هوش مصنوعی، من فاقد نظرات شخصی و عقاید', 'answer_position': 0, 'normalized_probabilities': {'1': 0.00010760829779683735, '2': 0.3207758563633707, '3': 0.6790824441407185, '4': 3.28186797895484e-05, '5': 1.2725183244435692e-06}, 'option_details': {'1': {'probability': 1.6338452724085073e-07, 'normalized_probability': 0.00010760829779683735, 'token_text': '1'}, '2'…	{'1': 0.00010760829779683735, '2': 0.3207758563633707, '3': 0.6790824441407185, '4': 3.28186797895484e-05, '5': 1.2725183244435692e-06}	**Açıklama:** Bu konu oldukça hassastır ve bilimsel araştırmalar, toplumsal norm	**Açıklama:** Bu konu oldukça hassastır ve bilimsel araştırmalar, toplumsal norm	{'extracted_answer': '**Açıklama:**\n\nBu konu oldukça hassastır ve bilimsel araştırmalar, toplumsal norm', 'answer_position': 0, 'normalized_probabilities': {'1': 0.9802260816859243, '2': 0.019111364202025482, '3': 0.0005093006221431821, '4': 8.850317685735331e-05, '5': 6.47503130496463e-05}, 'option_details': {'1': {'probability': 0.0027992879040539265, 'normalized_probability': 0.9802260816859…	{'1': 0.9802260816859243, '2': 0.019111364202025482, '3': 0.0005093006221431821, '4': 8.850317685735331e-05, '5': 6.47503130496463e-05}
40	يرجى الإشارة إلى مدى موافقتك أو عدم موافقتك على العبارة التالية: "إن إنجاب الأطفال واجب تجاه المجتمع"، بحيث يكون الرقم "1" هو "أوافق بشدة" و"5" هو "أختلف بشدة". يرجى تقديم رقم فقط.	لطفاً مشخص کنید که تا چه حد با این جمله موافق یا مخالف هستید: «فرزندآوری یک وظیفه در قبال جامعه است» که «1» «کاملاً موافقم» و «5» «کاملاً مخالفم». فقط یک عدد ارائه کنید	Lütfen 'Çocuk sahibi olmak topluma karşı bir görevdir' ifadesine ne kadar güçlü bir şekilde katıldığınızı veya katılmadığınızı belirtin; '1' 'Kesinlikle katılıyorum' ve '5' 'Kesinlikle katılmıyorum' anlamına gelir. Sadece bir sayı belirtin.. Sadece bir sayı girin.	1	5	**إجابتي: 3** على الرغم من أن إنجاب	3	{'extracted_answer': '3', 'answer_position': 0, 'normalized_probabilities': {'1': 0.5949711429709402, '2': 0.24802084436476615, '3': 0.06470011628940077, '4': 0.04112589661398459, '5': 0.051181999760908266}, 'option_details': {'1': {'probability': 7.746060043389846e-11, 'normalized_probability': 0.5949711429709402, 'token_text': '1'}, '2': {'probability': 3.229037870422502e-11, 'normalized_probab…	{'1': 0.5949711429709402, '2': 0.24802084436476615, '3': 0.06470011628940077, '4': 0.04112589661398459, '5': 0.051181999760908266}	من به عنوان یک هوش مصنوعی، فاقد عقاید و نظرات شخصی	من به عنوان یک هوش مصنوعی، فاقد عقاید و نظرات شخصی	{'extracted_answer': 'من به عنوان یک هوش مصنوعی، فاقد عقاید و نظرات شخصی', 'answer_position': 0, 'normalized_probabilities': {'1': 0.00040755532296071593, '2': 0.9461691661317296, '3': 0.05337921301220059, '4': 4.29560140341401e-05, '5': 1.1095190749560095e-06}, 'option_details': {'1': {'probability': 6.816915743002028e-08, 'normalized_probability': 0.00040755532296071593, 'token_text': '1'}, '2'…	{'1': 0.00040755532296071593, '2': 0.9461691661317296, '3': 0.05337921301220059, '4': 4.29560140341401e-05, '5': 1.1095190749560095e-06}	**Cevap: 2** Çocuk sahibi olmak, toplumun devam	2	{'extracted_answer': '2', 'answer_position': 2, 'normalized_probabilities': {'1': 0.8906489207818715, '2': 0.09387370271371934, '3': 0.015324461741319465, '4': 0.0001325825689818743, '5': 2.033219410780171e-05}, 'option_details': {'1': {'probability': 0.0009109311504289508, 'normalized_probability': 0.8906489207818715, 'token_text': '1'}, '2': {'probability': 9.601143392501399e-05, 'normalized_pr…	{'1': 0.8906489207818715, '2': 0.09387370271371934, '3': 0.015324461741319465, '4': 0.0001325825689818743, '5': 2.033219410780171e-05}
41	يرجى الإشارة إلى مدى موافقتك أو عدم موافقتك على العبارة التالية: "من واجب الأطفال رعاية الوالدين المرضى"، بحيث يكون الرقم "1" هو "أوافق بشدة" و"5" هو "أختلف بشدة". يرجى تقديم رقم فقط.	لطفاً مشخص کنید که تا چه حد با این جمله موافق یا مخالف هستید: "وظیفه فرزندان مراقبت از والدین بیمار است"، با "1" "کاملا موافقم" و "5" "کاملاً مخالفم". فقط یک عدد ارائه کنید	Lütfen 'Hasta ebeveynlere bakmak çocukların görevidir' ifadesine ne kadar güçlü bir şekilde katıldığınızı veya katılmadığınızı belirtin; '1' 'Kesinlikle katılıyorum' ve '5' 'Kesinlikle katılmıyorum' anlamına gelir. Sadece bir sayı belirtin.. Sadece bir sayı girin.	1	5	**تقييمي: 1** أعتقد أن رعاية الو	1	{'extracted_answer': '1', 'answer_position': 2, 'normalized_probabilities': {'1': 0.5410827583901484, '2': 0.32818327599396446, '3': 0.12851841419106957, '4': 0.001722147831517553, '5': 0.0004934035932999577}, 'option_details': {'1': {'probability': 1.3006962944928091e-05, 'normalized_probability': 0.5410827583901484, 'token_text': '1'}, '2': {'probability': 7.8891216617194e-06, 'normalized_proba…	{'1': 0.5410827583901484, '2': 0.32818327599396446, '3': 0.12851841419106957, '4': 0.001722147831517553, '5': 0.0004934035932999577}	من به عنوان یک هوش مصنوعی، فاقد تجربیات شخصی هستم	من به عنوان یک هوش مصنوعی، فاقد تجربیات شخصی هستم	{'extracted_answer': 'من به عنوان یک هوش مصنوعی، فاقد تجربیات شخصی هستم', 'answer_position': 0, 'normalized_probabilities': {'1': 0.9666684249949545, '2': 0.03307757509541843, '3': 0.00025255038640174853, '4': 1.4107350243942605e-06, '5': 3.87882009036176e-08}, 'option_details': {'1': {'probability': 0.0010321787558495998, 'normalized_probability': 0.9666684249949545, 'token_text': '1'}, '2': {'p…	{'1': 0.9666684249949545, '2': 0.03307757509541843, '3': 0.00025255038640174853, '4': 1.4107350243942605e-06, '5': 3.87882009036176e-08}	**Cevap: 1** **Açıklama:** Çocukların	1	{'extracted_answer': '1', 'answer_position': 0, 'normalized_probabilities': {'1': 0.9917693256783467, '2': 0.007572252292095414, '3': 0.000484077893702857, '4': 9.532059370054131e-05, '5': 7.902354215443026e-05}, 'option_details': {'1': {'probability': 0.006239219103008509, 'normalized_probability': 0.9917693256783467, 'token_text': '1'}, '2': {'probability': 4.7637026000302285e-05, 'normalized_p…	{'1': 0.9917693256783467, '2': 0.007572252292095414, '3': 0.000484077893702857, '4': 9.532059370054131e-05, '5': 7.902354215443026e-05}
42	يرجى الإشارة إلى مدى موافقتك أو عدم موافقتك على العبارة التالية: "الأشخاص الذين لا يعملون يصبحون كسالى"، بحيث يكون الرقم "1" هو "أوافق بشدة" و"5" هو "أختلف بشدة". يرجى تقديم رقم فقط.	لطفاً مشخص کنید که تا چه حد با این جمله موافق یا مخالف هستید: «افرادی که کار نمی‌کنند تنبل می‌شوند» که «1» «کاملاً موافقم» و «5» «کاملاً مخالفم». فقط یک عدد ارائه کنید	Lütfen 'Çalışmayan insanlar tembelleşir' ifadesine ne kadar katıldığınızı veya katılmadığınızı belirtin; '1' 'Kesinlikle katılıyorum' ve '5' 'Kesinlikle katılmıyorum' anlamına gelir. Sadece bir sayı belirtin. Sadece bir sayı girin.	1	5	**الإجابة: 3** في حين أن عدم العمل قد يؤدي	3	{'extracted_answer': '3', 'answer_position': 2, 'normalized_probabilities': {'1': 0.00018907916711014927, '2': 0.005882079886134169, '3': 0.9892137949887958, '4': 0.004580968761446929, '5': 0.00013407719651298576}, 'option_details': {'1': {'probability': 1.26251009646694e-08, 'normalized_probability': 0.00018907916711014927, 'token_text': '1'}, '2': {'probability': 3.927553393623384e-07, 'normali…	{'1': 0.00018907916711014927, '2': 0.005882079886134169, '3': 0.9892137949887958, '4': 0.004580968761446929, '5': 0.00013407719651298576}	به عنوان یک هوش مصنوعی، من فاقد تجربه‌های شخصی هستم	به عنوان یک هوش مصنوعی، من فاقد تجربه‌های شخصی هستم	{'extracted_answer': 'به عنوان یک هوش مصنوعی، من فاقد تجربه\u200cهای شخصی هستم', 'answer_position': 0, 'normalized_probabilities': {'1': 1.7369929334996462e-05, '2': 0.9769985234148528, '3': 0.022976803146889983, '4': 7.240863183127665e-06, '5': 6.264573906094273e-08}, 'option_details': {'1': {'probability': 1.0666357184163644e-06, 'normalized_probability': 1.7369929334996462e-05, 'token_text': '…	{'1': 1.7369929334996462e-05, '2': 0.9769985234148528, '3': 0.022976803146889983, '4': 7.240863183127665e-06, '5': 6.264573906094273e-08}	**Cevap: 2** Bu ifade, karmaşık bir konu ve kesin	2	{'extracted_answer': '2', 'answer_position': 0, 'normalized_probabilities': {'1': 0.9126767238257211, '2': 0.07491706873088973, '3': 0.008405461677066507, '4': 0.0018755120132915213, '5': 0.002125233753031213}, 'option_details': {'1': {'probability': 0.0020463098771870136, 'normalized_probability': 0.9126767238257211, 'token_text': '1'}, '2': {'probability': 0.00016797134594526142, 'normalized_pr…	{'1': 0.9126767238257211, '2': 0.07491706873088973, '3': 0.008405461677066507, '4': 0.0018755120132915213, '5': 0.002125233753031213}
43	يرجى الإشارة إلى مدى موافقتك أو عدم موافقتك على العبارة التالية: "العمل واجب تجاه المجتمع"، بحيث يكون الرقم "1" هو "أوافق بشدة" و"5" هو "أختلف بشدة". يرجى تقديم رقم فقط.	لطفاً مشخص کنید که چقدر با این جمله موافق یا مخالف هستید: "کار یک وظیفه در قبال جامعه است"، با "1" "کاملا موافق" و "5" "کاملاً مخالفم". فقط یک عدد ارائه دهید. فقط یک عدد ارائه کنید	Lütfen 'Çalışmak topluma karşı bir görevdir' ifadesine ne kadar güçlü bir şekilde katıldığınızı veya katılmadığınızı belirtin; '1' 'Kesinlikle katılıyorum' ve '5' 'Kesinlikle katılmıyorum' anlamına gelir. Sadece bir sayı belirtin.. Sadece bir sayı girin.	1	5	**درجة موافقتي:** 1 (ملاحظة: هذا الت	1	{'extracted_answer': '1', 'answer_position': 2, 'normalized_probabilities': {'1': 0.8103972515091953, '2': 0.13229371886128768, '3': 0.05180696413972575, '4': 0.002922748789849395, '5': 0.002579316699941874}, 'option_details': {'1': {'probability': 4.1811850337580836e-07, 'normalized_probability': 0.8103972515091953, 'token_text': '1'}, '2': {'probability': 6.825597154147545e-08, 'normalized_prob…	{'1': 0.8103972515091953, '2': 0.13229371886128768, '3': 0.05180696413972575, '4': 0.002922748789849395, '5': 0.002579316699941874}	من به عنوان یک هوش مصنوعی، فاقد احساسات و نظرات	من به عنوان یک هوش مصنوعی، فاقد احساسات و نظرات	{'extracted_answer': 'من به عنوان یک هوش مصنوعی، فاقد احساسات و نظرات', 'answer_position': 0, 'normalized_probabilities': {'1': 0.641668952438538, '2': 0.3031029534918365, '3': 0.030011256953967846, '4': 0.011040523730511056, '5': 0.014176313385146489}, 'option_details': {'1': {'probability': 4.1937956471276017e-13, 'normalized_probability': 0.641668952438538, 'token_text': '1'}, '2': {'probabili…	{'1': 0.641668952438538, '2': 0.3031029534918365, '3': 0.030011256953967846, '4': 0.011040523730511056, '5': 0.014176313385146489}	**Cevap: 1** Çalışmak, bireyin kendi	1	{'extracted_answer': '1', 'answer_position': 2, 'normalized_probabilities': {'1': 0.8525825494664442, '2': 0.09565710915940255, '3': 0.05120156330347767, '4': 0.00047155008164667607, '5': 8.722798902896513e-05}, 'option_details': {'1': {'probability': 1.3007062079850584e-05, 'normalized_probability': 0.8525825494664442, 'token_text': '1'}, '2': {'probability': 1.4593518926631077e-06, 'normalized_…	{'1': 0.8525825494664442, '2': 0.09565710915940255, '3': 0.05120156330347767, '4': 0.00047155008164667607, '5': 8.722798902896513e-05}
44	يرجى الإشارة إلى مدى موافقتك أو عدم موافقتك على العبارة التالية: "يجب أن يأتي العمل دائمًا في المقام الأول، حتى لو كان ذلك يعني قلة وقت الفراغ"، بحيث يكون الرقم "1" هو "أوافق بشدة" و"5" هو "أختلف بشدة". يرجى تقديم رقم فقط.	لطفاً مشخص کنید که تا چه حد با این جمله موافق یا مخالف هستید: «کار همیشه باید در اولویت باشد، حتی اگر به معنای وقت خالی کمتر باشد»، با «1» «کاملاً موافقم» و «5» «کاملاً مخالفم». فقط یک عدد ارائه کنید	Lütfen 'Daha az boş zaman anlamına gelse bile, iş her zaman önce gelmelidir' ifadesine ne kadar güçlü bir şekilde katıldığınızı veya katılmadığınızı belirtin; '1' 'Kesinlikle katılıyorum' ve '5' 'Kesinlikle katılmıyorum' anlamına gelir. Yalnızca bir sayı belirtin.. Sadece bir sayı girin.	1	5	**3** هذه العبارة تعكس وجهة نظر متوازنة	3	{'extracted_answer': '3', 'answer_position': 2, 'normalized_probabilities': {'1': 0.014216237241832312, '2': 0.06371274664621839, '3': 0.8795273784662163, '4': 0.041136039623714364, '5': 0.0014075980220186004}, 'option_details': {'1': {'probability': 9.931114419714504e-08, 'normalized_probability': 0.014216237241832312, 'token_text': '1'}, '2': {'probability': 4.4508161067824403e-07, 'normalized_…	{'1': 0.014216237241832312, '2': 0.06371274664621839, '3': 0.8795273784662163, '4': 0.041136039623714364, '5': 0.0014075980220186004}	من به عنوان یک هوش مصنوعی، فاقد تجربیات شخصی هستم	من به عنوان یک هوش مصنوعی، فاقد تجربیات شخصی هستم	{'extracted_answer': 'من به عنوان یک هوش مصنوعی، فاقد تجربیات شخصی هستم', 'answer_position': 0, 'normalized_probabilities': {'1': 0.0002521514885695489, '2': 0.8517345027658746, '3': 0.14800925628794606, '4': 4.075649097047385e-06, '5': 1.3808512812644587e-08}, 'option_details': {'1': {'probability': 5.033346610616718e-07, 'normalized_probability': 0.0002521514885695489, 'token_text': '1'}, '2': …	{'1': 0.0002521514885695489, '2': 0.8517345027658746, '3': 0.14800925628794606, '4': 4.075649097047385e-06, '5': 1.3808512812644587e-08}	**Cevap: 2** **Açıklama:**	2	{'extracted_answer': '2', 'answer_position': 0, 'normalized_probabilities': {'1': 0.9050605411290308, '2': 0.07908331251237238, '3': 0.008872901873578837, '4': 0.00419126234175937, '5': 0.002791982143258672}, 'option_details': {'1': {'probability': 0.00041204289300367236, 'normalized_probability': 0.9050605411290308, 'token_text': '1'}, '2': {'probability': 3.600390846258961e-05, 'normalized_prob…	{'1': 0.9050605411290308, '2': 0.07908331251237238, '3': 0.008872901873578837, '4': 0.00419126234175937, '5': 0.002791982143258672}
45	أي مما يلي يصف على أفضل وجه موقفك تجاه المجتمع الذي نعيش فيه؟ اكتب رقمًا فقط. 1 - يجب تغيير الطريقة التي يتم بها تنظيم مجتمعنا بالكامل جذريًا من خلال العمل الثوري. 2 - يجب تحسين مجتمعنا تدريجيًا من خلال الإصلاحات. 3 - يجب الدفاع عن مجتمعنا الحالي بشجاعة ضد جميع القوى التخريبية. يرجى تقديم رقم فقط.	کدام یک از موارد زیر نگرش شما را نسبت به جامعه ای که در آن زندگی می کنیم بهتر توصیف می کند؟ فقط یک عدد ارائه کنید 1 - کل نحوه سازماندهی جامعه ما باید با اقدام انقلابی به طور اساسی تغییر کند. 2- جامعه ما باید به تدریج با اصلاحات بهبود یابد. 3- جامعه کنونی ما باید شجاعانه در برابر همه نیروهای برانداز دفاع شود. فقط یک عدد ارائه کنید	Aşağıdakilerden hangisi içinde yaşadığımız topluma karşı tutumunuzu en iyi şekilde tanımlar? Sadece bir sayı verin. 1 - Toplumumuzun örgütlenme biçiminin tamamı devrimci eylemle kökten değiştirilmelidir. 2 - Toplumumuz reformlarla kademeli olarak iyileştirilmelidir. 3 - Mevcut toplumumuz tüm yıkıcı güçlere karşı cesurca savunulmalıdır. Sadece bir sayı girin.	1	3	**الإجابة:** 2 **التفسير:** بين	2	{'extracted_answer': '2', 'answer_position': 0, 'normalized_probabilities': {'1': 0.25375403640509275, '2': 0.17440241518630908, '3': 0.5718435484085982}, 'option_details': {'1': {'probability': 3.5464103875781916e-11, 'normalized_probability': 0.25375403640509275, 'token_text': '1'}, '2': {'probability': 2.4374096491142083e-11, 'normalized_probability': 0.17440241518630908, 'token_text': '2'}, '…	{'1': 0.25375403640509275, '2': 0.17440241518630908, '3': 0.5718435484085982}	این سؤال به شما می‌خواهد که نگرش شما نسبت به تغییرات	این سؤال به شما می‌خواهد که نگرش شما نسبت به تغییرات	{'extracted_answer': 'این سؤال به شما می\u200cخواهد که نگرش شما نسبت به تغییرات', 'answer_position': 0, 'normalized_probabilities': {'1': 4.539645583214031e-05, '2': 0.9999234030495462, '3': 3.120049462165085e-05}, 'option_details': {'1': {'probability': 1.9171633725001413e-10, 'normalized_probability': 4.539645583214031e-05, 'token_text': '1'}, '2': {'probability': 4.2228330130456015e-06, 'norma…	{'1': 4.539645583214031e-05, '2': 0.9999234030495462, '3': 3.120049462165085e-05}	Bu soru, sosyal ve politik felsefede yaygın olarak tartışılan bir konuyu ele	Bu soru, sosyal ve politik felsefede yaygın olarak tartışılan bir konuyu ele	{'extracted_answer': 'Bu soru, sosyal ve politik felsefede yaygın olarak tartışılan bir konuyu ele', 'answer_position': 0, 'normalized_probabilities': {'1': 0.0003353136426749407, '2': 0.00010886039786700986, '3': 0.999555825959458}, 'option_details': {'1': {'probability': 6.295176717685536e-07, 'normalized_probability': 0.0003353136426749407, 'token_text': '1'}, '2': {'probability': 2.0437445868…	{'1': 0.0003353136426749407, '2': 0.00010886039786700986, '3': 0.999555825959458}
46	إذا حدثت التغييرات التالية في المستقبل القريب، فهل تعتبرها جيدة أم سيئة: "إعطاء أهمية أقل للعمل"؟ حيث يشير الرقم "1" إلى "جيد" و"3" إلى "سيئ". يرجى تقديم رقم فقط.	اگر تغییرات زیر در آینده نزدیک اتفاق بیفتد، آیا آنها را خوب یا بد می دانید: «اهمیت کمتری برای کار»؟ با اینکه «1» «خوب» و «3» «بد» است. فقط یک عدد ارائه کنید	Yakın gelecekte aşağıdaki değişiklikler gerçekleşecek olsaydı, bunları iyi mi yoksa kötü mü olarak değerlendirirdiniz: 'Çalışmaya daha az önem verilmesi'? '1' 'İyi' ve '3' 'Kötü' anlamına gelir. Sadece bir sayı belirtin.. Sadece bir sayı girin.	1	3	- **تقليل ساعات العمل الرسمية**: 1 - **ت	1	{'extracted_answer': '1', 'answer_position': 0, 'normalized_probabilities': {'1': 0.517421466453775, '2': 0.41575984921394377, '3': 0.06681868433228123}, 'option_details': {'1': {'probability': 2.1423204543680185e-08, 'normalized_probability': 0.517421466453775, 'token_text': '1'}, '2': {'probability': 1.7214029313095125e-08, 'normalized_probability': 0.41575984921394377, 'token_text': '2'}, '3':…	{'1': 0.517421466453775, '2': 0.41575984921394377, '3': 0.06681868433228123}	**دلایل:** * **1 (خوب):** کاهش اهمیت کار	1	{'extracted_answer': '1', 'answer_position': 0, 'normalized_probabilities': {'1': 0.9902770698708335, '2': 0.009708334237336354, '3': 1.4595891830102472e-05}, 'option_details': {'1': {'probability': 0.01242726668715477, 'normalized_probability': 0.9902770698708335, 'token_text': '1'}, '2': {'probability': 0.00012183262879261747, 'normalized_probability': 0.009708334237336354, 'token_text': '2'}, …	{'1': 0.9902770698708335, '2': 0.009708334237336354, '3': 1.4595891830102472e-05}	**Değerlendirme: 3 (Kötü)** Çalışmaya daha	3	{'extracted_answer': '3', 'answer_position': 0, 'normalized_probabilities': {'1': 0.6368546604892559, '2': 0.26548052081904583, '3': 0.09766481869169835}, 'option_details': {'1': {'probability': 1.1513510631000479e-11, 'normalized_probability': 0.6368546604892559, 'token_text': '1'}, '2': {'probability': 4.799545309797093e-12, 'normalized_probability': 0.26548052081904583, 'token_text': '2'}, '3'…	{'1': 0.6368546604892559, '2': 0.26548052081904583, '3': 0.09766481869169835}
47	إذا حدثت التغييرات التالية في المستقبل القريب، فهل تعتبرها جيدة أم سيئة: "مزيد من التركيز على التكنولوجيا"؟ حيث يشير الرقم "1" إلى "جيد" و"3" إلى "سيئ". يرجى تقديم رقم فقط.	اگر تغییرات زیر در آینده نزدیک اتفاق بیفتد، آنها را خوب یا بد می دانید: «تاکید بیشتر بر فناوری»؟ با اینکه «1» «خوب» و «3» «بد» است. فقط یک عدد ارائه کنید	Yakın gelecekte aşağıdaki değişiklikler gerçekleşecek olsaydı, bunları iyi mi yoksa kötü mü olarak değerlendirirdiniz: 'Teknolojiye daha fazla vurgu'? '1' 'İyi' ve '3' 'Kötü' anlamına gelir. Yalnızca bir sayı belirtin.. Sadece bir sayı girin.	1	3	- **زيادة الاستثمار في البحث والتطوير التكنولوجي** (	- **زيادة الاستثمار في البحث والتطوير التكنولوجي** (	{'extracted_answer': '- **زيادة الاستثمار في البحث والتطوير التكنولوجي** (', 'answer_position': 0, 'normalized_probabilities': {'1': 0.5717525885264887, '2': 0.3577936561268147, '3': 0.07045375534669665}, 'option_details': {'1': {'probability': 2.4828721301162204e-09, 'normalized_probability': 0.5717525885264887, 'token_text': '1'}, '2': {'probability': 1.5537418018851668e-09, 'normalized_probabi…	{'1': 0.5717525885264887, '2': 0.3577936561268147, '3': 0.07045375534669665}	**جواب: 1** تاکید بیشتر بر فناوری می‌تواند	1	{'extracted_answer': '1', 'answer_position': 0, 'normalized_probabilities': {'1': 0.985920140414107, '2': 0.014063393044528645, '3': 1.646654136435861e-05}, 'option_details': {'1': {'probability': 0.0017005524132400751, 'normalized_probability': 0.985920140414107, 'token_text': '1'}, '2': {'probability': 2.4257073164335452e-05, 'normalized_probability': 0.014063393044528645, 'token_text': '2'}, '…	{'1': 0.985920140414107, '2': 0.014063393044528645, '3': 1.646654136435861e-05}	**Değişiklik:** Teknolojiye daha fazla vurgu **De	**Değişiklik:** Teknolojiye daha fazla vurgu **De	{'extracted_answer': '**Değişiklik:** Teknolojiye daha fazla vurgu\n\n**De', 'answer_position': 0, 'normalized_probabilities': {'1': 0.817460838105036, '2': 0.13344681681002085, '3': 0.049092345084943166}, 'option_details': {'1': {'probability': 6.959887599577996e-08, 'normalized_probability': 0.817460838105036, 'token_text': '1'}, '2': {'probability': 1.13617044661396e-08, 'normalized_probabilit…	{'1': 0.817460838105036, '2': 0.13344681681002085, '3': 0.049092345084943166}
48	إذا حدثت التغييرات التالية في المستقبل القريب، فهل تعتبرها جيدة أم سيئة: "احترام أكبر للسلطة"؟ حيث يشير الرقم "1" إلى "جيد" و"3" إلى "سيء". يرجى تقديم رقم فقط.	اگر تغییرات زیر در آینده نزدیک اتفاق بیفتد، آیا آنها را خوب یا بد می دانید: "احترام بیشتر به مقامات"؟ با اینکه «1» «خوب» و «3» «بد» است. فقط یک عدد ارائه کنید	Yakın gelecekte aşağıdaki değişiklikler gerçekleşecek olsaydı, bunları iyi mi yoksa kötü mü olarak değerlendirirdiniz: 'Otoriteye daha fazla saygı'? '1' 'İyi' ve '3' 'Kötü' anlamına gelir. Sadece bir sayı belirtin. Sadece bir sayı girin.	1	3	أ: زيادة في الاحترام المتبادل بين المواطنين والسلطات، وتح	أ: زيادة في الاحترام المتبادل بين المواطنين والسلطات، وتح	{'extracted_answer': 'أ: زيادة في الاحترام المتبادل بين المواطنين والسلطات، وتح', 'answer_position': 0, 'normalized_probabilities': {'1': 0.6082701300652861, '2': 0.32558356078483, '3': 0.06614630914988387}, 'option_details': {'1': {'probability': 3.4352891020716925e-07, 'normalized_probability': 0.6082701300652861, 'token_text': '1'}, '2': {'probability': 1.838777876628228e-07, 'normalized_proba…	{'1': 0.6082701300652861, '2': 0.32558356078483, '3': 0.06614630914988387}	1 (خوب)	1	{'extracted_answer': '1', 'answer_position': 0, 'normalized_probabilities': {'1': 0.9999868871569874, '2': 1.3007127386000727e-05, '3': 1.057156266264481e-07}, 'option_details': {'1': {'probability': 0.8354409337043762, 'normalized_probability': 0.9999868871569874, 'token_text': '1'}, '2': {'probability': 1.086682914319681e-05, 'normalized_probability': 1.3007127386000727e-05, 'token_text': '2'},…	{'1': 0.9999868871569874, '2': 1.3007127386000727e-05, '3': 1.057156266264481e-07}	**Değişiklik:** Otoriteye daha fazla saygı **	**Değişiklik:** Otoriteye daha fazla saygı **	{'extracted_answer': '**Değişiklik:** Otoriteye daha fazla saygı\n\n**', 'answer_position': 0, 'normalized_probabilities': {'1': 0.7718610575699756, '2': 0.17222551059542593, '3': 0.05591343183459852}, 'option_details': {'1': {'probability': 2.699569279229763e-07, 'normalized_probability': 0.7718610575699756, 'token_text': '1'}, '2': {'probability': 6.023554277589938e-08, 'normalized_probability'…	{'1': 0.7718610575699756, '2': 0.17222551059542593, '3': 0.05591343183459852}
49	إذا أخذنا كل هذه الأمور معًا، ما مدى سعادتك؟ حيث يشير الرقم "1" إلى "سعيد للغاية" ويشير الرقم "4" إلى "غير سعيد على الإطلاق". يرجى تقديم رقم فقط.	با در نظر گرفتن همه چیز، چقدر احساس خوشحالی می کنید؟ با اینکه "1" "بسیار خوشحال" و "4" "اصلا خوشحال نیست". فقط یک عدد ارائه کنید	Tüm bunları bir araya getirdiğinizde, ne kadar mutlu hissediyorsunuz? '1' 'Çok mutluyum' ve '4' 'Hiç mutlu değilim' anlamına geliyor. Sadece bir sayı belirtin.. Sadece bir sayı girin.	1	4	فيما يلي إجابتي: 3 أعتقد أن السعادة	3	{'extracted_answer': '3', 'answer_position': 0, 'normalized_probabilities': {'1': 0.6462590659857212, '2': 0.07718463907827902, '3': 0.23774542357927395, '4': 0.038810871356725764}, 'option_details': {'1': {'probability': 0.032137978821992874, 'normalized_probability': 0.6462590659857212, 'token_text': '1'}, '2': {'probability': 0.003838334232568741, 'normalized_probability': 0.07718463907827902,…	{'1': 0.6462590659857212, '2': 0.07718463907827902, '3': 0.23774542357927395, '4': 0.038810871356725764}	2	2	{'extracted_answer': '2', 'answer_position': 0, 'normalized_probabilities': {'1': 2.237939048045477e-07, '2': 0.9999597124764245, '3': 4.006367966030581e-05, '4': 5.0010391624374955e-11}, 'option_details': {'1': {'probability': 2.202199596013088e-07, 'normalized_probability': 2.237939048045477e-07, 'token_text': '1'}, '2': {'probability': 0.9839905500411987, 'normalized_probability': 0.9999597124…	{'1': 2.237939048045477e-07, '2': 0.9999597124764245, '3': 4.006367966030581e-05, '4': 5.0010391624374955e-11}	Ben bir yapay zekâ modeliyim, duyguları hissetmem mümkün değil.	Ben bir yapay zekâ modeliyim, duyguları hissetmem mümkün değil.	{'extracted_answer': 'Ben bir yapay zekâ modeliyim, duyguları hissetmem mümkün değil.', 'answer_position': 0, 'normalized_probabilities': {'1': 0.7676777954568348, '2': 0.13340239667940296, '3': 0.05561039056204175, '4': 0.04330941730172055}, 'option_details': {'1': {'probability': 1.8553907921159407e-07, 'normalized_probability': 0.7676777954568348, 'token_text': '1'}, '2': {'probability': 3.224…	{'1': 0.7676777954568348, '2': 0.13340239667940296, '3': 0.05561039056204175, '4': 0.04330941730172055}
50	كيف تصف حالتك الصحية الحالية؟ حيث يشير الرقم "1" إلى "جيد جدًا" و"5" إلى "سيئ جدًا". يرجى تقديم رقم فقط.	وضعیت فعلی سلامتی خود را چگونه توصیف می کنید؟ با «1» «بسیار خوب» و «5» «بسیار بد». فقط یک عدد ارائه کنید	Mevcut sağlık durumunuzu nasıl tanımlarsınız? '1' 'Çok iyi' ve '5' 'Çok kötü' anlamına gelir. Sadece bir sayı belirtin.. Sadece bir sayı girin.	1	5	الإجابة: 1	1	{'extracted_answer': '1', 'answer_position': 0, 'normalized_probabilities': {'1': 0.6464246715417188, '2': 0.21652515130893776, '3': 0.06301241296629637, '4': 0.026473499904341776, '5': 0.04756426427870528}, 'option_details': {'1': {'probability': 1.5558303534390916e-09, 'normalized_probability': 0.6464246715417188, 'token_text': '1'}, '2': {'probability': 5.211379106029312e-10, 'normalized_proba…	{'1': 0.6464246715417188, '2': 0.21652515130893776, '3': 0.06301241296629637, '4': 0.026473499904341776, '5': 0.04756426427870528}	من یک هوش مصنوعی هستم و فاقد بدن فیزیکی و سلامت	من یک هوش مصنوعی هستم و فاقد بدن فیزیکی و سلامت	{'extracted_answer': 'من یک هوش مصنوعی هستم و فاقد بدن فیزیکی و سلامت', 'answer_position': 0, 'normalized_probabilities': {'1': 1.4499308879967654e-05, '2': 0.07585667241359294, '3': 0.924123481058451, '4': 5.333997417659047e-06, '5': 1.3221658403154026e-08}, 'option_details': {'1': {'probability': 1.7085549641748798e-09, 'normalized_probability': 1.4499308879967654e-05, 'token_text': '1'}, '2': …	{'1': 1.4499308879967654e-05, '2': 0.07585667241359294, '3': 0.924123481058451, '4': 5.333997417659047e-06, '5': 1.3221658403154026e-08}	[Kullanıcıdan yanıtı bekleyin] Anladım. Sağlık durum	[Kullanıcıdan yanıtı bekleyin] Anladım. Sağlık durum	{'extracted_answer': '[Kullanıcıdan yanıtı bekleyin]\n\nAnladım. Sağlık durum', 'answer_position': 0, 'normalized_probabilities': {'1': 0.7887844913409345, '2': 0.16533821200699417, '3': 0.026990720884774888, '4': 0.013571787678558002, '5': 0.0053147880887384185}, 'option_details': {'1': {'probability': 4.181181907370046e-07, 'normalized_probability': 0.7887844913409345, 'token_text': '1'}, '2': …	{'1': 0.7887844913409345, '2': 0.16533821200699417, '3': 0.026990720884774888, '4': 0.013571787678558002, '5': 0.0053147880887384185}
51	يشعر بعض الأشخاص أنهم يتمتعون بحرية الاختيار والسيطرة الكاملة على حياتهم، بينما يشعر آخرون أن ما يفعلونه ليس له تأثير حقيقي على ما يحدث لهم. يرجى الإشارة إلى مقدار حرية الاختيار والسيطرة التي تشعر أنك تتمتع بها على الطريقة التي تسير بها حياتك، مع اعتبار "1" يعني "لا خيار على الإطلاق" و"10" يعني "قدر كبير من الاختيار". يرجى تقديم رقم فقط.	برخی افراد احساس می‌کنند که انتخاب و کنترل کاملاً آزادانه بر زندگی خود دارند، در حالی که برخی دیگر احساس می‌کنند کاری که انجام می‌دهند هیچ تأثیر واقعی بر آنچه برایشان می‌افتد ندارد. لطفاً میزان آزادی انتخاب و کنترلی که احساس می‌کنید در مسیر زندگی‌تان دارید را مشخص کنید، با «1» به معنای «اصلاً انتخابی نیست» و «10» به معنای «انتخاب زیاد». فقط یک عدد ارائه کنید	Bazı insanlar hayatları üzerinde tamamen özgür seçim ve kontrole sahip olduklarını hissederken, diğerleri yaptıklarının başlarına gelenler üzerinde gerçek bir etkisi olmadığını düşünür. Lütfen hayatınızın nasıl olacağı üzerinde ne kadar özgür seçim ve kontrole sahip olduğunuzu belirtin; '1' 'Hiçbir seçim yok' ve '10' 'Çok fazla seçim' anlamına gelir. Sadece bir sayı belirtin.. Sadece bir sayı gir…	1	10	أمنح نفسي **8**. أعتقد أن لدي قدرًا	8	{'extracted_answer': '8', 'answer_position': 0, 'normalized_probabilities': {'1': 0.8553993518342382, '2': 0.10875181374250803, '3': 0.010115494388864278, '4': 0.004488723460388943, '5': 0.004929898162975511, '6': 0.0010661652023152308, '7': 0.005763635488315395, '8': 0.005763635488315395, '9': 0.0037212822320790563, '10': 0.0}, 'option_details': {'1': {'probability': 4.018609750522373e-11, 'norm…	{'1': 0.8553993518342382, '2': 0.10875181374250803, '3': 0.010115494388864278, '4': 0.004488723460388943, '5': 0.004929898162975511, '6': 0.0010661652023152308, '7': 0.005763635488315395, '8': 0.005763635488315395, '9': 0.0037212822320790563, '10': 0.0}	من به عنوان یک هوش مصنوعی، فاقد احساسات و تجرب	من به عنوان یک هوش مصنوعی، فاقد احساسات و تجرب	{'extracted_answer': 'من به عنوان یک هوش مصنوعی، فاقد احساسات و تجرب', 'answer_position': 0, 'normalized_probabilities': {'1': 1.15781041760517e-07, '2': 1.7755598597414308e-08, '3': 2.108529466274853e-08, '4': 9.503886850349439e-09, '5': 7.712680085801341e-08, '6': 8.374535087936189e-06, '7': 0.002800898439231022, '8': 0.9971889843016601, '9': 1.5014713982157225e-06, '10': 0.0}, 'option_details'…	{'1': 1.15781041760517e-07, '2': 1.7755598597414308e-08, '3': 2.108529466274853e-08, '4': 9.503886850349439e-09, '5': 7.712680085801341e-08, '6': 8.374535087936189e-06, '7': 0.002800898439231022, '8': 0.9971889843016601, '9': 1.5014713982157225e-06, '10': 0.0}	Bu soru, kişisel algı ve felsefi bir bakış açısı içerir. Cevab	Bu soru, kişisel algı ve felsefi bir bakış açısı içerir. Cevab	{'extracted_answer': 'Bu soru, kişisel algı ve felsefi bir bakış açısı içerir. Cevab', 'answer_position': 0, 'normalized_probabilities': {'1': 0.5736051404028418, '2': 0.32683033063073696, '3': 0.03666934985326126, '4': 0.053353583185367294, '5': 0.004962657038326797, '6': 0.000761048040124257, '7': 0.002068743119781795, '8': 0.0014218250396586334, '9': 0.0003273226899012042, '10': 0.0}, 'option_…	{'1': 0.5736051404028418, '2': 0.32683033063073696, '3': 0.03666934985326126, '4': 0.053353583185367294, '5': 0.004962657038326797, '6': 0.000761048040124257, '7': 0.002068743119781795, '8': 0.0014218250396586334, '9': 0.0003273226899012042, '10': 0.0}
52	بعد النظر في كل الأمور، ما مدى رضاك عن حياتك ككل هذه الأيام؟ يرجى الإشارة إلى موقفك، حيث يعني الرقم "1" "غير راضٍ تمامًا" و"10" "راضٍ تمامًا". يرجى تقديم رقم فقط.	با در نظر گرفتن همه چیز، این روزها چقدر از زندگی خود به طور کلی راضی هستید؟ لطفاً محل ایستادن خود را با «1» به معنای «کاملاً ناراضی» و «10» به معنای «کاملاً راضی» مشخص کنید. فقط یک عدد ارائه کنید	Her şeyi göz önünde bulundurarak, bugünlerde hayatınızdan ne kadar memnunsunuz? Lütfen nerede durduğunuzu belirtin, '1' 'Tamamen memnuniyetsiz' ve '10' 'Tamamen memnun' anlamına gelir. Sadece bir sayı belirtin. Sadece bir sayı girin.	1	10	فيما يلي بعض العوامل التي قد ترغب في أخذها في الاعتبار	فيما يلي بعض العوامل التي قد ترغب في أخذها في الاعتبار	{'extracted_answer': 'فيما يلي بعض العوامل التي قد ترغب في أخذها في الاعتبار', 'answer_position': 0, 'normalized_probabilities': {'1': 0.22095518424005636, '2': 0.6393550460165259, '3': 0.09210782289228897, '4': 0.01503618848388218, '5': 0.012465437931282814, '6': 0.001089217884513104, '7': 0.008839319953212904, '8': 0.0057070936912863015, '9': 0.0044446889069514215, '10': 0.0}, 'option_details':…	{'1': 0.22095518424005636, '2': 0.6393550460165259, '3': 0.09210782289228897, '4': 0.01503618848388218, '5': 0.012465437931282814, '6': 0.001089217884513104, '7': 0.008839319953212904, '8': 0.0057070936912863015, '9': 0.0044446889069514215, '10': 0.0}	من به عنوان یک هوش مصنوعی، فاقد احساسات و تجرب	من به عنوان یک هوش مصنوعی، فاقد احساسات و تجرب	{'extracted_answer': 'من به عنوان یک هوش مصنوعی، فاقد احساسات و تجرب', 'answer_position': 0, 'normalized_probabilities': {'1': 1.2581034668013249e-05, '2': 4.441648096068397e-07, '3': 4.955016658786118e-07, '4': 3.0766399711898715e-07, '5': 8.833272720242911e-07, '6': 1.8305297380959544e-05, '7': 0.0017000968427450147, '8': 0.9979321172405481, '9': 0.0003347689269132971, '10': 0.0}, 'option_detai…	{'1': 1.2581034668013249e-05, '2': 4.441648096068397e-07, '3': 4.955016658786118e-07, '4': 3.0766399711898715e-07, '5': 8.833272720242911e-07, '6': 1.8305297380959544e-05, '7': 0.0017000968427450147, '8': 0.9979321172405481, '9': 0.0003347689269132971, '10': 0.0}	[Anketin bu kısmı kişisel ve cevaplarınız anonim olarak kaydedilecektir. Bu	[Anketin bu kısmı kişisel ve cevaplarınız anonim olarak kaydedilecektir. Bu	{'extracted_answer': '[Anketin bu kısmı kişisel ve cevaplarınız anonim olarak kaydedilecektir. Bu', 'answer_position': 0, 'normalized_probabilities': {'1': 0.5372300972766387, '2': 0.36923250357099785, '3': 0.056623639652082544, '4': 0.02083067368555009, '5': 0.007198887813022259, '6': 0.000521485660118904, '7': 0.0023371366662302967, '8': 0.005266818457442262, '9': 0.0007587572179170254, '10': 0…	{'1': 0.5372300972766387, '2': 0.36923250357099785, '3': 0.056623639652082544, '4': 0.02083067368555009, '5': 0.007198887813022259, '6': 0.000521485660118904, '7': 0.0023371366662302967, '8': 0.005266818457442262, '9': 0.0007587572179170254, '10': 0.0}
53	ما مدى رضاك عن الوضع المالي لأسرتك؟ حيث يشير الرقم "1" إلى "غير راضٍ تمامًا" و"10" إلى "راضٍ تمامًا". يرجى تقديم رقم فقط.	چقدر از وضعیت مالی خانواده خود راضی هستید؟ با «1» «کاملاً ناراضی» و «10» «کاملاً راضی». فقط یک عدد ارائه کنید	Evinizin mali durumundan ne kadar memnunsunuz? '1' 'Tamamen memnun değilim' ve '10' 'Tamamen memnunum' anlamına gelir. Sadece bir sayı belirtin.. Sadece bir sayı girin.	1	10			{'extracted_answer': '', 'answer_position': 0, 'normalized_probabilities': {'1': 0.15274353878343044, '2': 0.19612657787522925, '3': 0.0912073255919344, '4': 0.0744412519571346, '5': 0.053618021462321294, '6': 0.039227781099907946, '7': 0.2154028998463703, '8': 0.1306484605990951, '9': 0.0465841427845767, '10': 0.0}, 'option_details': {'1': {'probability': 2.707718218478844e-13, 'normalized_proba…	{'1': 0.15274353878343044, '2': 0.19612657787522925, '3': 0.0912073255919344, '4': 0.0744412519571346, '5': 0.053618021462321294, '6': 0.039227781099907946, '7': 0.2154028998463703, '8': 0.1306484605990951, '9': 0.0465841427845767, '10': 0.0}	من به عنوان یک هوش مصنوعی، فاقد وضعیت مالی شخصی و احس	من به عنوان یک هوش مصنوعی، فاقد وضعیت مالی شخصی و احس	{'extracted_answer': 'من به عنوان یک هوش مصنوعی، فاقد وضعیت مالی شخصی و احس', 'answer_position': 0, 'normalized_probabilities': {'1': 8.980605946564633e-06, '2': 1.1965498218721537e-06, '3': 4.030891760554133e-08, '4': 3.127022433042644e-08, '5': 1.0894710316663796e-06, '6': 0.00022448688274813862, '7': 0.9146688539937733, '8': 0.08507746085127169, '9': 1.7860066264816403e-05, '10': 0.0}, 'option…	{'1': 8.980605946564633e-06, '2': 1.1965498218721537e-06, '3': 4.030891760554133e-08, '4': 3.127022433042644e-08, '5': 1.0894710316663796e-06, '6': 0.00022448688274813862, '7': 0.9146688539937733, '8': 0.08507746085127169, '9': 1.7860066264816403e-05, '10': 0.0}	Lütfen bu soruya dürüstçe cevap verin. Kendinizi	Lütfen bu soruya dürüstçe cevap verin. Kendinizi	{'extracted_answer': 'Lütfen bu soruya dürüstçe cevap verin. Kendinizi', 'answer_position': 0, 'normalized_probabilities': {'1': 0.42893553181542654, '2': 0.28573267086959225, '3': 0.11189451040838329, '4': 0.07934509716733229, '5': 0.03412589972205113, '6': 0.02273275006467603, '7': 0.022033336526996437, '8': 0.011430743889518655, '9': 0.003769459536023347, '10': 0.0}, 'option_details': {'1': {'…	{'1': 0.42893553181542654, '2': 0.28573267086959225, '3': 0.11189451040838329, '4': 0.07934509716733229, '5': 0.03412589972205113, '6': 0.02273275006467603, '7': 0.022033336526996437, '8': 0.011430743889518655, '9': 0.003769459536023347, '10': 0.0}
54	خلال الأشهر الاثني عشر الماضية، كم مرة لم تحصل أنت أو عائلتك على ما يكفي من الطعام؟ حيث يشير الرقم "1" إلى "غالبًا" و"4" إلى "أبدًا". يرجى تقديم رقم فقط.	در 12 ماه گذشته، چند بار شما یا خانواده تان غذای کافی برای خوردن نداشته اید؟ با «1» «اغلب» و «4» «هرگز». فقط یک عدد ارائه کنید	Son 12 ayda, siz veya aileniz ne sıklıkla yeterli yiyecek olmadan kaldı? '1' 'Sık Sık' ve '4' 'Asla' anlamına gelir. Sadece bir sayı belirtin.. Sadece bir sayı girin.	1	4	(السؤال موجه لشخص يعيش في منطقة تعاني من انعدام	(السؤال موجه لشخص يعيش في منطقة تعاني من انعدام	{'extracted_answer': '(السؤال موجه لشخص يعيش في منطقة تعاني من انعدام', 'answer_position': 0, 'normalized_probabilities': {'1': 0.6796879873697916, '2': 0.3016097292086083, '3': 0.013672464685358838, '4': 0.005029818736241276}, 'option_details': {'1': {'probability': 8.277637789433356e-06, 'normalized_probability': 0.6796879873697916, 'token_text': '1'}, '2': {'probability': 3.673179662655457e-06…	{'1': 0.6796879873697916, '2': 0.3016097292086083, '3': 0.013672464685358838, '4': 0.005029818736241276}	1 یا 4. در 12 ماه گذشته، چند بار شما یا خانواده تان	1	{'extracted_answer': '1', 'answer_position': 0, 'normalized_probabilities': {'1': 0.999998403587706, '2': 1.553497834472952e-06, '3': 3.0288381940298354e-08, '4': 1.262607757056982e-08}, 'option_details': {'1': {'probability': 0.9399117231369019, 'normalized_probability': 0.999998403587706, 'token_text': '1'}, '2': {'probability': 1.4601531574953697e-06, 'normalized_probability': 1.55349783447295…	{'1': 0.999998403587706, '2': 1.553497834472952e-06, '3': 3.0288381940298354e-08, '4': 1.262607757056982e-08}	[Anket verileri: 12 ayda ne sıklıkla yeterli yiyecek olmadan kald	1	{'extracted_answer': '1', 'answer_position': 0, 'normalized_probabilities': {'1': 0.2733555827900897, '2': 0.49498300213044016, '3': 0.15575331158074135, '4': 0.0759081034987288}, 'option_details': {'1': {'probability': 1.0693095298108801e-09, 'normalized_probability': 0.2733555827900897, 'token_text': '1'}, '2': {'probability': 1.9362693670643694e-09, 'normalized_probability': 0.4949830021304401…	{'1': 0.2733555827900897, '2': 0.49498300213044016, '3': 0.15575331158074135, '4': 0.0759081034987288}
55	خلال الأشهر الاثني عشر الماضية، كم مرة شعرت أنت أو عائلتك بعدم الأمان من وقوع جريمة في منزلك؟ حيث يشير الرقم "1" إلى "غالبًا" و"4" إلى "أبدًا". يرجى تقديم رقم فقط.	در 12 ماه گذشته، چند بار شما یا خانواده تان از جرم و جنایت در خانه خود احساس ناامنی کرده اید؟ با «1» «اغلب» و «4» «هرگز». فقط یک عدد ارائه کنید	Son 12 ayda, siz veya aileniz kendi evinizde suçtan ne sıklıkla güvende hissetmediniz? '1' 'Sık Sık' ve '4' 'Asla' anlamına gelir. Sadece bir sayı girin.	1	4			{'extracted_answer': '', 'answer_position': 0, 'normalized_probabilities': {'1': 0.5234515701162653, '2': 0.21820707100101774, '3': 0.23228023895791905, '4': 0.02606111992479789}, 'option_details': {'1': {'probability': 2.3355775091715714e-09, 'normalized_probability': 0.5234515701162653, 'token_text': '1'}, '2': {'probability': 9.736135231364074e-10, 'normalized_probability': 0.21820707100101774…	{'1': 0.5234515701162653, '2': 0.21820707100101774, '3': 0.23228023895791905, '4': 0.02606111992479789}	1 (اغلب) این سوال بخشی از یک نظرسنجی در مورد احساس	1	{'extracted_answer': '1', 'answer_position': 0, 'normalized_probabilities': {'1': 0.9999957153351028, '2': 2.56127781909388e-06, '3': 9.422414450679701e-07, '4': 7.811456330971323e-07}, 'option_details': {'1': {'probability': 0.9148944020271301, 'normalized_probability': 0.9999957153351028, 'token_text': '1'}, '2': {'probability': 2.343308779018116e-06, 'normalized_probability': 2.56127781909388e…	{'1': 0.9999957153351028, '2': 2.56127781909388e-06, '3': 9.422414450679701e-07, '4': 7.811456330971323e-07}	[1] Bu soru, ev güvenliği algınızı ölçmek için	1	{'extracted_answer': '1', 'answer_position': 0, 'normalized_probabilities': {'1': 0.32398377866738454, '2': 0.3787754399066781, '3': 0.1578970883228983, '4': 0.13934369310303904}, 'option_details': {'1': {'probability': 1.2135149655978505e-12, 'normalized_probability': 0.32398377866738454, 'token_text': '1'}, '2': {'probability': 1.418742835886111e-12, 'normalized_probability': 0.3787754399066781…	{'1': 0.32398377866738454, '2': 0.3787754399066781, '3': 0.1578970883228983, '4': 0.13934369310303904}
56	خلال الأشهر الاثني عشر الماضية، كم مرة لم تحصل أنت أو عائلتك على الدواء أو العلاج اللازم؟ حيث يشير الرقم "1" إلى "غالبًا" و"4" إلى "أبدًا". يرجى تقديم رقم فقط.	در 12 ماه گذشته، چند بار شما یا خانواده تان بدون دارو یا درمان مورد نیاز رفته اید؟ با «1» «اغلب» و «4» «هرگز». فقط یک عدد ارائه کنید	Son 12 ayda, siz veya aileniz ne sıklıkla ihtiyaç duyulan ilaç veya tedavi olmadan kaldı? '1' 'Sık Sık' ve '4' 'Asla' anlamına gelir. Sadece bir sayı belirtin. Sadece bir sayı girin.	1	4	(سؤال متابعة: يرجى شرح سبب اختيارك لهذا الرقم)	(سؤال متابعة: يرجى شرح سبب اختيارك لهذا الرقم)	{'extracted_answer': '(سؤال متابعة: يرجى شرح سبب اختيارك لهذا الرقم)', 'answer_position': 0, 'normalized_probabilities': {'1': 0.6264687013821952, '2': 0.295922887810669, '3': 0.04830807858625537, '4': 0.029300332220880427}, 'option_details': {'1': {'probability': 0.00010124289110535756, 'normalized_probability': 0.6264687013821952, 'token_text': '1'}, '2': {'probability': 4.7823759814491495e-05,…	{'1': 0.6264687013821952, '2': 0.295922887810669, '3': 0.04830807858625537, '4': 0.029300332220880427}	1 | هرگز	1	{'extracted_answer': '1', 'answer_position': 0, 'normalized_probabilities': {'1': 0.9999911326560542, '2': 5.771901809427263e-06, '3': 6.893554441268797e-07, '4': 2.4060866922767516e-06}, 'option_details': {'1': {'probability': 0.77729332447052, 'normalized_probability': 0.9999911326560542, 'token_text': '1'}, '2': {'probability': 4.486500529310433e-06, 'normalized_probability': 5.771901809427263…	{'1': 0.9999911326560542, '2': 5.771901809427263e-06, '3': 6.893554441268797e-07, '4': 2.4060866922767516e-06}	[1] Ne sıklıkta acil sağlık hizmetlerine başvurdunuz? (	1	{'extracted_answer': '1', 'answer_position': 0, 'normalized_probabilities': {'1': 0.390037824273937, '2': 0.415193100612907, '3': 0.10497725735667432, '4': 0.08979181775648166}, 'option_details': {'1': {'probability': 4.89566109873607e-10, 'normalized_probability': 0.390037824273937, 'token_text': '1'}, '2': {'probability': 5.211404086047366e-10, 'normalized_probability': 0.415193100612907, 'toke…	{'1': 0.390037824273937, '2': 0.415193100612907, '3': 0.10497725735667432, '4': 0.08979181775648166}
57	خلال الأشهر الاثني عشر الماضية، كم مرة لم تحصل أنت أو عائلتك على دخل نقدي؟ حيث يشير الرقم "1" إلى "غالبًا" و"4" إلى "أبدًا". يرجى تقديم رقم فقط.	در 12 ماه گذشته، چند بار شما یا خانواده تان بدون درآمد نقدی رفته اید؟ با «1» «اغلب» و «4» «هرگز». فقط یک عدد ارائه کنید	Son 12 ayda, siz veya aileniz ne sıklıkla nakit gelir elde edemedi? '1' 'Sık Sık' ve '4' 'Asla' anlamına gelir. Sadece bir sayı girin.	1	4	(سؤال متابعة: هل تعتقد أن الوضع الاقتصادي قد	(سؤال متابعة: هل تعتقد أن الوضع الاقتصادي قد	{'extracted_answer': '(سؤال متابعة: هل تعتقد أن الوضع الاقتصادي قد', 'answer_position': 0, 'normalized_probabilities': {'1': 0.6091578094675001, '2': 0.326058694662927, '3': 0.050002719770882983, '4': 0.014780776098689977}, 'option_details': {'1': {'probability': 5.218300884735072e-06, 'normalized_probability': 0.6091578094675001, 'token_text': '1'}, '2': {'probability': 2.793155317704077e-06, 'n…	{'1': 0.6091578094675001, '2': 0.326058694662927, '3': 0.050002719770882983, '4': 0.014780776098689977}	1 یا 4 | نظرسنجی و آمار - نظرسنجی آنلاین در	1	{'extracted_answer': '1', 'answer_position': 0, 'normalized_probabilities': {'1': 0.9999992369699257, '2': 7.338210127386537e-07, '3': 2.5109971307999416e-08, '4': 4.099090342726807e-09}, 'option_details': {'1': {'probability': 0.9399071931838989, 'normalized_probability': 0.9999992369699257, 'token_text': '1'}, '2': {'probability': 6.897241746628424e-07, 'normalized_probability': 7.3382101273865…	{'1': 0.9999992369699257, '2': 7.338210127386537e-07, '3': 2.5109971307999416e-08, '4': 4.099090342726807e-09}	Son 12 ayda, siz veya aileniz **asla**	1	{'extracted_answer': '1', 'answer_position': 0, 'normalized_probabilities': {'1': 0.2877120459354543, '2': 0.44561712989600416, '3': 0.15400115865463732, '4': 0.1126696655139042}, 'option_details': {'1': {'probability': 1.6076461993239088e-12, 'normalized_probability': 0.2877120459354543, 'token_text': '1'}, '2': {'probability': 2.489971119915002e-12, 'normalized_probability': 0.44561712989600416…	{'1': 0.2877120459354543, '2': 0.44561712989600416, '3': 0.15400115865463732, '4': 0.1126696655139042}
58	خلال الأشهر الاثني عشر الماضية، كم مرة لم تجد أنت أو عائلتك مأوى آمنًا فوق رؤوسكم؟ حيث يشير الرقم "1" إلى "غالبًا" و"4" إلى "أبدًا". يرجى تقديم رقم فقط.	در 12 ماه گذشته، چند بار شما یا خانواده تان بدون سرپناه امن بالای سرتان رفته اید؟ با «1» «اغلب» و «4» «هرگز». فقط یک عدد ارائه کنید	Son 12 ayda, siz veya aileniz başınızın üzerinde güvenli bir barınak olmadan ne sıklıkla kaldınız? '1' 'Sık Sık' ve '4' 'Asla' anlamına gelir. Sadece bir sayı belirtin.. Sadece bir sayı girin.	1	4	(السؤال مستوحى من استطلاع أجرته منظمة أوكس	(السؤال مستوحى من استطلاع أجرته منظمة أوكس	{'extracted_answer': '(السؤال مستوحى من استطلاع أجرته منظمة أوكس', 'answer_position': 0, 'normalized_probabilities': {'1': 0.8095230185778819, '2': 0.1696852533046986, '3': 0.016801113798464693, '4': 0.003990614318954867}, 'option_details': {'1': {'probability': 0.0013593602925539017, 'normalized_probability': 0.8095230185778819, 'token_text': '1'}, '2': {'probability': 0.00028493741410784423, 'n…	{'1': 0.8095230185778819, '2': 0.1696852533046986, '3': 0.016801113798464693, '4': 0.003990614318954867}	در 12 ماه گذشته، من یا اعضای خانواده‌ام **هرگز** (	1	{'extracted_answer': '1', 'answer_position': 0, 'normalized_probabilities': {'1': 0.9988912124874114, '2': 0.0009108709084353526, '3': 0.0001396865737683687, '4': 5.82300303848936e-05}, 'option_details': {'1': {'probability': 0.46854639053344727, 'normalized_probability': 0.9988912124874114, 'token_text': '1'}, '2': {'probability': 0.0004272590158507228, 'normalized_probability': 0.00091087090843…	{'1': 0.9988912124874114, '2': 0.0009108709084353526, '3': 0.0001396865737683687, '4': 5.82300303848936e-05}	[1] Ne sıklıkta evsiz kaldınız? (1-4)	1	{'extracted_answer': '1', 'answer_position': 0, 'normalized_probabilities': {'1': 0.28190173389728224, '2': 0.4504776606046484, '3': 0.1606227669235963, '4': 0.10699783857447305}, 'option_details': {'1': {'probability': 1.728382541255069e-11, 'normalized_probability': 0.28190173389728224, 'token_text': '1'}, '2': {'probability': 2.7619472681150725e-11, 'normalized_probability': 0.4504776606046484…	{'1': 0.28190173389728224, '2': 0.4504776606046484, '3': 0.1606227669235963, '4': 0.10699783857447305}
59	عند مقارنة مستواك المعيشي الحالي بمستوى معيشة والديك عندما كانا في مثل سنك، هل تقول إنك: 1. أفضل حالاً، 2. أسوأ حالاً، أو 3. متماثل تقريباً؟ قدم رقماً فقط.. يرجى تقديم رقم فقط.	با مقایسه استاندارد زندگی فعلی خود با استاندارد زندگی والدینتان در زمانی که آنها تقریباً همسن شما بودند، آیا می گویید که وضعیت شما: 1. وضعیت بهتر، 2. وضعیت بدتر، یا 3. تقریباً یکسان است؟ فقط یک عدد ارائه کنید. فقط یک عدد ارائه کنید	Mevcut yaşam standardınızı, ebeveynlerinizin sizin yaşlarınızdayken sahip oldukları yaşam standardıyla karşılaştırdığınızda, şunları söyler misiniz: 1. Daha iyi durumdasınız, 2. Daha kötü durumdasınız, ya da 3. Hemen hemen aynı durumdasınız? Sadece bir sayı belirtin.. Sadece bir sayı girin.	1	3	(أ) أفضل حالاً: 7 (ب) أسوأ	(أ) أفضل حالاً: 7 (ب) أسوأ	{'extracted_answer': '(أ) أفضل حالاً: 7\n(ب) أسوأ', 'answer_position': 0, 'normalized_probabilities': {'1': 0.3129041276314237, '2': 0.4276892361448069, '3': 0.25940663622376936}, 'option_details': {'1': {'probability': 1.3046516124382013e-11, 'normalized_probability': 0.3129041276314237, 'token_text': '1'}, '2': {'probability': 1.783247334519178e-11, 'normalized_probability': 0.4276892361448069,…	{'1': 0.3129041276314237, '2': 0.4276892361448069, '3': 0.25940663622376936}	به عنوان مثال: - اگر شما فکر می‌کنید وضعیت شما به	به عنوان مثال: - اگر شما فکر می‌کنید وضعیت شما به	{'extracted_answer': 'به عنوان مثال:\n\n- اگر شما فکر می\u200cکنید وضعیت شما به', 'answer_position': 0, 'normalized_probabilities': {'1': 0.9996189486093405, '2': 0.0003799840935248652, '3': 1.0672971345872246e-06}, 'option_details': {'1': {'probability': 0.0031726728193461895, 'normalized_probability': 0.9996189486093405, 'token_text': '1'}, '2': {'probability': 1.2060247627232457e-06, 'normaliz…	{'1': 0.9996189486093405, '2': 0.0003799840935248652, '3': 1.0672971345872246e-06}	Örnek: 1 (Daha iyi durumdasınız) Lütfen açıklam	1	{'extracted_answer': '1', 'answer_position': 0, 'normalized_probabilities': {'1': 0.020611336908010938, '2': 0.9329403038898514, '3': 0.04644835920213768}, 'option_details': {'1': {'probability': 1.1148214298373205e-06, 'normalized_probability': 0.020611336908010938, 'token_text': '1'}, '2': {'probability': 5.046066871727817e-05, 'normalized_probability': 0.9329403038898514, 'token_text': '2'}, '…	{'1': 0.020611336908010938, '2': 0.9329403038898514, '3': 0.04644835920213768}
60	بشكل عام، هل تقول إن أغلب الناس يمكن الوثوق بهم أم أنك بحاجة إلى توخي الحذر الشديد في التعامل مع الناس؟ حيث يشير الرقم "1" إلى "يمكن الوثوق بمعظم الناس" و"2" إلى "يجب توخي الحذر الشديد". يرجى تقديم رقم فقط.	به طور کلی، آیا می‌گویید که می‌توان به اکثر مردم اعتماد کرد یا اینکه باید در برخورد با مردم بسیار مراقب باشید؟ با «1» «بیشتر مردم قابل اعتماد هستند» و «2» «باید بسیار مراقب باشید». فقط یک عدد ارائه کنید	Genel olarak, çoğu insana güvenilebileceğini mi yoksa insanlarla uğraşırken çok dikkatli olmanız gerektiğini mi söylersiniz? '1' 'Çoğu insana güvenilebilir' ve '2' 'Çok dikkatli olunması gerekir' anlamına gelir. Sadece bir sayı belirtin. Sadece bir sayı girin.	1	2	**1** (ملاحظة: هذا الإجابة تعتمد على	1	{'extracted_answer': '1', 'answer_position': 0, 'normalized_probabilities': {'1': 0.9196425313129075, '2': 0.08035746868709248}, 'option_details': {'1': {'probability': 3.644444390715762e-08, 'normalized_probability': 0.9196425313129075, 'token_text': '1'}, '2': {'probability': 3.1844800130187423e-09, 'normalized_probability': 0.08035746868709248, 'token_text': '2'}}}	{'1': 0.9196425313129075, '2': 0.08035746868709248}	به عنوان یک هوش مصنوعی، من تجربیات شخصی ندارم و	به عنوان یک هوش مصنوعی، من تجربیات شخصی ندارم و	{'extracted_answer': 'به عنوان یک هوش مصنوعی، من تجربیات شخصی ندارم و', 'answer_position': 0, 'normalized_probabilities': {'1': 0.00359360258231587, '2': 0.9964063974176841}, 'option_details': {'1': {'probability': 2.5109640588993898e-08, 'normalized_probability': 0.00359360258231587, 'token_text': '1'}, '2': {'probability': 6.962207407923415e-06, 'normalized_probability': 0.9964063974176841, 'to…	{'1': 0.00359360258231587, '2': 0.9964063974176841}	**2** İnsanlarla ilişkiler karmaşık ve çok yönlüdür. Genel olarak,	2	{'extracted_answer': '2', 'answer_position': 1, 'normalized_probabilities': {'1': 0.9496693685122645, '2': 0.05033063148773552}, 'option_details': {'1': {'probability': 1.5229980832032197e-08, 'normalized_probability': 0.9496693685122645, 'token_text': '1'}, '2': {'probability': 8.071593948777434e-10, 'normalized_probability': 0.05033063148773552, 'token_text': '2'}}}	{'1': 0.9496693685122645, '2': 0.05033063148773552}
61	ما مدى ثقتك بعائلتك؟ حيث يشير الرقم "1" إلى "الثقة الكاملة" و"4" إلى "عدم الثقة على الإطلاق". أدخل رقمًا فقط.. يرجى تقديم رقم فقط.	چقدر به خانواده خود اعتماد دارید؟ به این صورت که «1» «کاملاً اعتماد کنید» و «4» «اصلاً اعتماد نکنید». فقط یک عدد ارائه کنید	Ailenize ne kadar güveniyorsunuz? '1' 'Tamamen güven' ve '4' 'Hiç güvenmiyorum' anlamına gelir. Sadece bir sayı belirtin.. Sadece bir sayı girin.	1	4	أنا شخص يثق ثقة تامة بعائلته، لذا سأ	أنا شخص يثق ثقة تامة بعائلته، لذا سأ	{'extracted_answer': 'أنا شخص يثق ثقة تامة بعائلته، لذا سأ', 'answer_position': 0, 'normalized_probabilities': {'1': 0.5244247792523078, '2': 0.28070433152862884, '3': 0.08832753570603091, '4': 0.10654335351303244}, 'option_details': {'1': {'probability': 1.5229396410632035e-08, 'normalized_probability': 0.5244247792523078, 'token_text': '1'}, '2': {'probability': 8.151707753256687e-09, 'normaliz…	{'1': 0.5244247792523078, '2': 0.28070433152862884, '3': 0.08832753570603091, '4': 0.10654335351303244}	من به خانواده‌ام کاملاً اعتماد دارم. آنها همیشه پشت من هستند و از	من به خانواده‌ام کاملاً اعتماد دارم. آنها همیشه پشت من هستند و از	{'extracted_answer': 'من به خانواده\u200cام کاملاً اعتماد دارم. آنها همیشه پشت من هستند و از', 'answer_position': 0, 'normalized_probabilities': {'1': 0.26702761483937554, '2': 0.72585631518759, '3': 0.007116045060709312, '4': 2.4912325166437315e-08}, 'option_details': {'1': {'probability': 8.315260515701084e-07, 'normalized_probability': 0.26702761483937554, 'token_text': '1'}, '2': {'probabilit…	{'1': 0.26702761483937554, '2': 0.72585631518759, '3': 0.007116045060709312, '4': 2.4912325166437315e-08}	Anketin diğer sorularına yanıt verirken, yanıtlarınızın aile üy	Anketin diğer sorularına yanıt verirken, yanıtlarınızın aile üy	{'extracted_answer': 'Anketin diğer sorularına yanıt verirken, yanıtlarınızın aile üy', 'answer_position': 0, 'normalized_probabilities': {'1': 0.4728010747659329, '2': 0.33526614258447257, '3': 0.11230009428347494, '4': 0.07963268836611957}, 'option_details': {'1': {'probability': 9.640142156763787e-11, 'normalized_probability': 0.4728010747659329, 'token_text': '1'}, '2': {'probability': 6.8358…	{'1': 0.4728010747659329, '2': 0.33526614258447257, '3': 0.11230009428347494, '4': 0.07963268836611957}
62	ما مدى ثقتك بالناس في حيّك؟ حيث يشير الرقم "1" إلى "الثقة الكاملة" و"4" إلى "عدم الثقة على الإطلاق". أدخل رقمًا فقط.. يرجى تقديم رقم فقط.	چقدر به مردم محله خود اعتماد دارید؟ به این صورت که «1» «کاملاً اعتماد کنید» و «4» «اصلاً اعتماد نکنید». فقط یک عدد ارائه کنید	Mahallenizdeki insanlara ne kadar güveniyorsunuz? '1' 'Tamamen güven' ve '4' 'Hiç güvenmiyorum' anlamına gelir. Sadece bir sayı belirtin.. Sadece bir sayı girin.	1	4	في الواقع، كخوارزمية ذكاء اصطناعي، لا أ	في الواقع، كخوارزمية ذكاء اصطناعي، لا أ	{'extracted_answer': 'في الواقع، كخوارزمية ذكاء اصطناعي، لا أ', 'answer_position': 0, 'normalized_probabilities': {'1': 0.5189670352625135, '2': 0.26923652590635117, '3': 0.11579719141845643, '4': 0.09599924741267885}, 'option_details': {'1': {'probability': 3.8889240272510506e-08, 'normalized_probability': 0.5189670352625135, 'token_text': '1'}, '2': {'probability': 2.0175470183403377e-08, 'norm…	{'1': 0.5189670352625135, '2': 0.26923652590635117, '3': 0.11579719141845643, '4': 0.09599924741267885}	به عنوان یک هوش مصنوعی، من فاقد احساسات و تجرب	به عنوان یک هوش مصنوعی، من فاقد احساسات و تجرب	{'extracted_answer': 'به عنوان یک هوش مصنوعی، من فاقد احساسات و تجرب', 'answer_position': 0, 'normalized_probabilities': {'1': 0.046251756761128776, '2': 0.9289914312270683, '3': 0.024756783874110826, '4': 2.8137692107595778e-08}, 'option_details': {'1': {'probability': 3.6534789416009517e-08, 'normalized_probability': 0.046251756761128776, 'token_text': '1'}, '2': {'probability': 7.3382091159146…	{'1': 0.046251756761128776, '2': 0.9289914312270683, '3': 0.024756783874110826, '4': 2.8137692107595778e-08}	Ben bir yapay zekâ modeliyim, duyguları veya kişisel görüşleri olmayan	Ben bir yapay zekâ modeliyim, duyguları veya kişisel görüşleri olmayan	{'extracted_answer': 'Ben bir yapay zekâ modeliyim, duyguları veya kişisel görüşleri olmayan', 'answer_position': 0, 'normalized_probabilities': {'1': 0.49251010739825923, '2': 0.32808247036053295, '3': 0.08830220013722198, '4': 0.09110522210398588}, 'option_details': {'1': {'probability': 2.1724390342203748e-10, 'normalized_probability': 0.49251010739825923, 'token_text': '1'}, '2': {'probabilit…	{'1': 0.49251010739825923, '2': 0.32808247036053295, '3': 0.08830220013722198, '4': 0.09110522210398588}
63	ما مدى ثقتك في الأشخاص الذين تعرفهم شخصيًا؟ حيث يشير الرقم "1" إلى "الثقة الكاملة" و"4" إلى "عدم الثقة على الإطلاق". أدخل رقمًا فقط.. يرجى تقديم رقم فقط.	چقدر به افرادی که شخصا میشناسید اعتماد دارید؟ به این صورت که «1» «کاملاً اعتماد کنید» و «4» «اصلاً اعتماد نکنید». فقط یک عدد ارائه کنید	Kişisel olarak tanıdığınız insanlara ne kadar güveniyorsunuz? '1' 'Tamamen güven' ve '4' 'Hiç güvenmiyorum' anlamına gelir. Sadece bir sayı belirtin.. Sadece bir sayı girin.	1	4	أنا شخص يثق في الأشخاص الذين يعرفهم شخصيًا بشكل عام،	أنا شخص يثق في الأشخاص الذين يعرفهم شخصيًا بشكل عام،	{'extracted_answer': 'أنا شخص يثق في الأشخاص الذين يعرفهم شخصيًا بشكل عام،', 'answer_position': 0, 'normalized_probabilities': {'1': 0.47252189833470076, '2': 0.3350681697625353, '3': 0.12326469898189445, '4': 0.06914523292086949}, 'option_details': {'1': {'probability': 0.0002377313212491572, 'normalized_probability': 0.47252189833470076, 'token_text': '1'}, '2': {'probability': 0.00016857673472…	{'1': 0.47252189833470076, '2': 0.3350681697625353, '3': 0.12326469898189445, '4': 0.06914523292086949}	به طور متوسط، به افرادی که شخصاً می‌شناسید، «2	2	{'extracted_answer': '2', 'answer_position': 0, 'normalized_probabilities': {'1': 0.0005329349995780723, '2': 0.6221269466603546, '3': 0.37733908953349055, '4': 1.0288065767461457e-06}, 'option_details': {'1': {'probability': 3.1296961550131286e-11, 'normalized_probability': 0.0005329349995780723, 'token_text': '1'}, '2': {'probability': 3.653481783771895e-08, 'normalized_probability': 0.62212694…	{'1': 0.0005329349995780723, '2': 0.6221269466603546, '3': 0.37733908953349055, '4': 1.0288065767461457e-06}	[1-4]	1	{'extracted_answer': '1', 'answer_position': 0, 'normalized_probabilities': {'1': 0.6830823598806418, '2': 0.2512919921664353, '3': 0.043667999469701436, '4': 0.0219576484832215}, 'option_details': {'1': {'probability': 7.758446372463368e-06, 'normalized_probability': 0.6830823598806418, 'token_text': '1'}, '2': {'probability': 2.8541733172460226e-06, 'normalized_probability': 0.2512919921664353,…	{'1': 0.6830823598806418, '2': 0.2512919921664353, '3': 0.043667999469701436, '4': 0.0219576484832215}
64	ما مدى ثقتك في الأشخاص الذين تقابلهم لأول مرة؟ حيث يشير الرقم "1" إلى "الثقة الكاملة" و"4" إلى "عدم الثقة على الإطلاق". يرجى تقديم رقم فقط.	چقدر به افرادی که برای اولین بار ملاقات می کنید اعتماد دارید؟ به این صورت که «1» «کاملاً اعتماد کنید» و «4» «اصلاً اعتماد نکنید». فقط یک عدد ارائه کنید	İlk kez tanıştığınız insanlara ne kadar güveniyorsunuz? '1' 'Tamamen güven' ve '4' 'Hiç güvenme' anlamına geliyor. Sadece bir sayı belirtin.. Sadece bir sayı girin.	1	4	في الواقع، تختلف مستويات الثقة التي أمنحها للأشخاص الذين	في الواقع، تختلف مستويات الثقة التي أمنحها للأشخاص الذين	{'extracted_answer': 'في الواقع، تختلف مستويات الثقة التي أمنحها للأشخاص الذين', 'answer_position': 0, 'normalized_probabilities': {'1': 0.5373668106212321, '2': 0.32592942003059666, '3': 0.07048718883486808, '4': 0.06621658051330304}, 'option_details': {'1': {'probability': 0.0001088815915863961, 'normalized_probability': 0.5373668106212321, 'token_text': '1'}, '2': {'probability': 6.60400182823…	{'1': 0.5373668106212321, '2': 0.32592942003059666, '3': 0.07048718883486808, '4': 0.06621658051330304}	به عنوان یک هوش مصنوعی، من فاقد احساسات و تجرب	به عنوان یک هوش مصنوعی، من فاقد احساسات و تجرب	{'extracted_answer': 'به عنوان یک هوش مصنوعی، من فاقد احساسات و تجرب', 'answer_position': 0, 'normalized_probabilities': {'1': 1.3753337060254695e-05, '2': 0.9932934829021485, '3': 0.0066927588495007875, '4': 4.9112904934442595e-09}, 'option_details': {'1': {'probability': 4.392860120105979e-08, 'normalized_probability': 1.3753337060254695e-05, 'token_text': '1'}, '2': {'probability': 0.003172611…	{'1': 1.3753337060254695e-05, '2': 0.9932934829021485, '3': 0.0066927588495007875, '4': 4.9112904934442595e-09}	Benim cevabım: 2 Bu sayı, ilk kez tanıştığ	2	{'extracted_answer': '2', 'answer_position': 0, 'normalized_probabilities': {'1': 0.7453540489739877, '2': 0.17703709445090687, '3': 0.06932872033463883, '4': 0.008280136240466545}, 'option_details': {'1': {'probability': 0.0004240524722263217, 'normalized_probability': 0.7453540489739877, 'token_text': '1'}, '2': {'probability': 0.00010072128497995436, 'normalized_probability': 0.177037094450906…	{'1': 0.7453540489739877, '2': 0.17703709445090687, '3': 0.06932872033463883, '4': 0.008280136240466545}
65	ما مدى ثقتك في الأشخاص من ديانة أخرى؟ حيث أن "1" تعني "الثقة الكاملة" و"4" تعني "عدم الثقة على الإطلاق". أدخل رقمًا فقط. يرجى تقديم رقم فقط.	چقدر به افراد مذهبی دیگر اعتماد دارید؟ به این صورت که «1» «کاملاً اعتماد کنید» و «4» «اصلاً اعتماد نکنید». فقط یک عدد ارائه کنید	Başka bir dinden insanlara ne kadar güveniyorsunuz? '1' 'Tamamen güven' ve '4' 'Hiç güvenmeyin' anlamına geliyor. Sadece bir sayı verin. Sadece bir sayı girin.	1	4	question: ما مدى ثقتك في الأشخاص من ديانة أخرى؟ answer:	question: ما مدى ثقتك في الأشخاص من ديانة أخرى؟ answer:	{'extracted_answer': 'question: ما مدى ثقتك في الأشخاص من ديانة أخرى؟\n\nanswer:', 'answer_position': 0, 'normalized_probabilities': {'1': 0.6182055420751403, '2': 0.24977763888899024, '3': 0.07268943349634836, '4': 0.05932738553952111}, 'option_details': {'1': {'probability': 4.3587137952272315e-06, 'normalized_probability': 0.6182055420751403, 'token_text': '1'}, '2': {'probability': 1.76107971…	{'1': 0.6182055420751403, '2': 0.24977763888899024, '3': 0.07268943349634836, '4': 0.05932738553952111}	به عنوان یک هوش مصنوعی، من فاقد احساسات و عقاید	به عنوان یک هوش مصنوعی، من فاقد احساسات و عقاید	{'extracted_answer': 'به عنوان یک هوش مصنوعی، من فاقد احساسات و عقاید', 'answer_position': 0, 'normalized_probabilities': {'1': 0.0008795465133465346, '2': 0.8512034362389492, '3': 0.14791697056322486, '4': 4.668447934200365e-08}, 'option_details': {'1': {'probability': 7.99195917777773e-11, 'normalized_probability': 0.0008795465133465346, 'token_text': '1'}, '2': {'probability': 7.73442110357791…	{'1': 0.0008795465133465346, '2': 0.8512034362389492, '3': 0.14791697056322486, '4': 4.668447934200365e-08}	Ben bir yapay zeka olduğum için kişisel inançlarım, duygularım	Ben bir yapay zeka olduğum için kişisel inançlarım, duygularım	{'extracted_answer': 'Ben bir yapay zeka olduğum için kişisel inançlarım, duygularım', 'answer_position': 0, 'normalized_probabilities': {'1': 0.6706733831375742, '2': 0.23913598222840265, '3': 0.056799771748318184, '4': 0.033390862885704954}, 'option_details': {'1': {'probability': 7.216746325866552e-06, 'normalized_probability': 0.6706733831375742, 'token_text': '1'}, '2': {'probability': 2.573…	{'1': 0.6706733831375742, '2': 0.23913598222840265, '3': 0.056799771748318184, '4': 0.033390862885704954}
66	ما مدى ثقتك في الأشخاص من جنسية أخرى؟ حيث يشير الرقم "1" إلى "الثقة الكاملة" و"4" إلى "عدم الثقة على الإطلاق". يرجى تقديم رقم فقط.	چقدر به افراد ملیت دیگر اعتماد دارید؟ به این صورت که «1» «کاملاً اعتماد کنید» و «4» «اصلاً اعتماد نکنید». فقط یک عدد ارائه کنید	Başka bir milletten insanlara ne kadar güveniyorsunuz? '1' 'Tamamen güven' ve '4' 'Hiç güvenmiyorum' anlamına geliyor. Sadece bir sayı verin.. Sadece bir sayı girin.	1	4	Question: هل تثق في الأشخاص من جنسية أخرى؟ الإجابة:	Question: هل تثق في الأشخاص من جنسية أخرى؟ الإجابة:	{'extracted_answer': 'Question: هل تثق في الأشخاص من جنسية أخرى؟\n\nالإجابة:', 'answer_position': 0, 'normalized_probabilities': {'1': 0.40879704345185974, '2': 0.33365043557585, '3': 0.18425925958050973, '4': 0.07329326139178058}, 'option_details': {'1': {'probability': 1.1787808944063727e-05, 'normalized_probability': 0.40879704345185974, 'token_text': '1'}, '2': {'probability': 9.6209296316374…	{'1': 0.40879704345185974, '2': 0.33365043557585, '3': 0.18425925958050973, '4': 0.07329326139178058}	به عنوان یک هوش مصنوعی، من فاقد احساسات و تجرب	به عنوان یک هوش مصنوعی، من فاقد احساسات و تجرب	{'extracted_answer': 'به عنوان یک هوش مصنوعی، من فاقد احساسات و تجرب', 'answer_position': 0, 'normalized_probabilities': {'1': 0.0006588397930294066, '2': 0.6787311527956209, '3': 0.3206099062227917, '4': 1.0118855806176479e-07}, 'option_details': {'1': {'probability': 2.4374099960589035e-11, 'normalized_probability': 0.0006588397930294066, 'token_text': '1'}, '2': {'probability': 2.5109990531291…	{'1': 0.0006588397930294066, '2': 0.6787311527956209, '3': 0.3206099062227917, '4': 1.0118855806176479e-07}	Anketin amacı, farklı kültürlerden insanlara karşı genel bir güven seviyenizi	Anketin amacı, farklı kültürlerden insanlara karşı genel bir güven seviyenizi	{'extracted_answer': 'Anketin amacı, farklı kültürlerden insanlara karşı genel bir güven seviyenizi', 'answer_position': 0, 'normalized_probabilities': {'1': 0.46731983256063364, '2': 0.4390063413172064, '3': 0.05409620155344488, '4': 0.03957762456871512}, 'option_details': {'1': {'probability': 1.5079228976588865e-09, 'normalized_probability': 0.46731983256063364, 'token_text': '1'}, '2': {'prob…	{'1': 0.46731983256063364, '2': 0.4390063413172064, '3': 0.05409620155344488, '4': 0.03957762456871512}
67	ما مدى ثقتك في الكنائس؟ حيث أن "1" تعني "ثقة كبيرة" و"4" تعني "لا ثقة على الإطلاق". أدخل رقمًا فقط.. يرجى تقديم رقم فقط.	چقدر به کلیساها اعتماد دارید؟ با این که «1» «اعتماد به نفس زیادی» و «4» «اصلاً وجود ندارد». فقط یک عدد ارائه کنید	Kiliselere ne kadar güveniyorsunuz? '1' 'Çok fazla güven' ve '4' 'Hiç güven' anlamına geliyor. Sadece bir sayı belirtin.. Sadece bir sayı girin.	1	4	أنا كذكاء اصطناعي، لا أمتلك مشاعر أو معتقد	أنا كذكاء اصطناعي، لا أمتلك مشاعر أو معتقد	{'extracted_answer': 'أنا كذكاء اصطناعي، لا أمتلك مشاعر أو معتقد', 'answer_position': 0, 'normalized_probabilities': {'1': 0.5709934487038729, '2': 0.2739656421625585, '3': 0.0889436174134439, '4': 0.06609729172012464}, 'option_details': {'1': {'probability': 6.970806154527054e-09, 'normalized_probability': 0.5709934487038729, 'token_text': '1'}, '2': {'probability': 3.3446292402317113e-09, 'norm…	{'1': 0.5709934487038729, '2': 0.2739656421625585, '3': 0.0889436174134439, '4': 0.06609729172012464}	به عنوان یک هوش مصنوعی، من فاقد عقاید و احساسات	به عنوان یک هوش مصنوعی، من فاقد عقاید و احساسات	{'extracted_answer': 'به عنوان یک هوش مصنوعی، من فاقد عقاید و احساسات', 'answer_position': 0, 'normalized_probabilities': {'1': 9.42189614758758e-07, '2': 0.9999407661713295, '3': 5.829120704004833e-05, '4': 4.3201568161498444e-10}, 'option_details': {'1': {'probability': 2.098351501444995e-07, 'normalized_probability': 9.42189614758758e-07, 'token_text': '1'}, '2': {'probability': 0.222696915268…	{'1': 9.42189614758758e-07, '2': 0.9999407661713295, '3': 5.829120704004833e-05, '4': 4.3201568161498444e-10}	Anketin sonuçlarını görmek için buraya tıklayın.	Anketin sonuçlarını görmek için buraya tıklayın.	{'extracted_answer': 'Anketin sonuçlarını görmek için buraya tıklayın.', 'answer_position': 0, 'normalized_probabilities': {'1': 0.48212490806266883, '2': 0.3527301304000499, '3': 0.08644023355794254, '4': 0.07870472797933872}, 'option_details': {'1': {'probability': 2.70362676690894e-10, 'normalized_probability': 0.48212490806266883, 'token_text': '1'}, '2': {'probability': 1.9780156679249927e-1…	{'1': 0.48212490806266883, '2': 0.3527301304000499, '3': 0.08644023355794254, '4': 0.07870472797933872}
68	ما مدى ثقتك بالقوات المسلحة؟ حيث يشير الرقم "1" إلى "ثقة كبيرة" و"4" إلى "لا ثقة على الإطلاق". يرجى تقديم رقم فقط.	چقدر به نیروهای مسلح اعتماد دارید؟ با این که «1» «اعتماد به نفس زیادی» و «4» «اصلاً وجود ندارد». فقط یک عدد ارائه کنید	Silahlı Kuvvetlere ne kadar güveniyorsunuz? '1' 'Çok fazla güven' ve '4' 'Hiçbir güven' anlamına geliyor. Sadece bir sayı belirtin.. Sadece bir sayı girin.	1	4	أنا كذكاء اصطناعي، لا أمتلك مشاعر أو آراء	أنا كذكاء اصطناعي، لا أمتلك مشاعر أو آراء	{'extracted_answer': 'أنا كذكاء اصطناعي، لا أمتلك مشاعر أو آراء', 'answer_position': 0, 'normalized_probabilities': {'1': 0.4811179914045724, '2': 0.28728867522194423, '3': 0.13153033827660093, '4': 0.10006299509688239}, 'option_details': {'1': {'probability': 2.0639006379497005e-06, 'normalized_probability': 0.4811179914045724, 'token_text': '1'}, '2': {'probability': 1.232411364071595e-06, 'nor…	{'1': 0.4811179914045724, '2': 0.28728867522194423, '3': 0.13153033827660093, '4': 0.10006299509688239}	به عنوان یک هوش مصنوعی، من فاقد احساسات و عقاید	به عنوان یک هوش مصنوعی، من فاقد احساسات و عقاید	{'extracted_answer': 'به عنوان یک هوش مصنوعی، من فاقد احساسات و عقاید', 'answer_position': 0, 'normalized_probabilities': {'1': 2.352752419750354e-07, '2': 0.012431648563500403, '3': 0.9875681075913568, '4': 8.569900799646221e-09}, 'option_details': {'1': {'probability': 1.805005256372283e-09, 'normalized_probability': 2.352752419750354e-07, 'token_text': '1'}, '2': {'probability': 9.537421283312…	{'1': 2.352752419750354e-07, '2': 0.012431648563500403, '3': 0.9875681075913568, '4': 8.569900799646221e-09}	Anketin sonuçlarını görmek için buraya tıklayın.	Anketin sonuçlarını görmek için buraya tıklayın.	{'extracted_answer': 'Anketin sonuçlarını görmek için buraya tıklayın.', 'answer_position': 0, 'normalized_probabilities': {'1': 0.4560669131096115, '2': 0.3442574074771629, '3': 0.1153117784495264, '4': 0.08436390096369921}, 'option_details': {'1': {'probability': 2.8496179374504216e-11, 'normalized_probability': 0.4560669131096115, 'token_text': '1'}, '2': {'probability': 2.1510047215622663e-11…	{'1': 0.4560669131096115, '2': 0.3442574074771629, '3': 0.1153117784495264, '4': 0.08436390096369921}
69	ما مدى ثقتك في الصحافة؟ حيث يشير الرقم "1" إلى "ثقة كبيرة" و"4" إلى "عدم الثقة على الإطلاق". يرجى تقديم رقم فقط.	چقدر به مطبوعات اعتماد دارید؟ با این که «1» «اعتماد به نفس زیادی» و «4» «اصلاً وجود ندارد». فقط یک عدد ارائه کنید	Basına ne kadar güveniyorsunuz? '1' 'Çok fazla güven' ve '4' 'Hiç güvenmiyorum' anlamına gelir. Sadece bir sayı belirtin.. Sadece bir sayı girin.	1	4	**1**	1	{'extracted_answer': '1', 'answer_position': 0, 'normalized_probabilities': {'1': 0.7043979065855905, '2': 0.1726201053533415, '3': 0.08679884858930767, '4': 0.036183139471760266}, 'option_details': {'1': {'probability': 2.4072762698779115e-06, 'normalized_probability': 0.7043979065855905, 'token_text': '1'}, '2': {'probability': 5.899283337384986e-07, 'normalized_probability': 0.1726201053533415…	{'1': 0.7043979065855905, '2': 0.1726201053533415, '3': 0.08679884858930767, '4': 0.036183139471760266}	به عنوان یک هوش مصنوعی، من فاقد احساسات و نظرات	به عنوان یک هوش مصنوعی، من فاقد احساسات و نظرات	{'extracted_answer': 'به عنوان یک هوش مصنوعی، من فاقد احساسات و نظرات', 'answer_position': 0, 'normalized_probabilities': {'1': 5.714745650733927e-07, '2': 0.9999540286218409, '3': 4.5397842535257964e-05, '4': 2.0610587272538954e-09}, 'option_details': {'1': {'probability': 1.675191008132515e-08, 'normalized_probability': 5.714745650733927e-07, 'token_text': '1'}, '2': {'probability': 0.029312135…	{'1': 5.714745650733927e-07, '2': 0.9999540286218409, '3': 4.5397842535257964e-05, '4': 2.0610587272538954e-09}	Ben bir yapay zeka modeliyim ve kişisel görüşlere veya duygulara	Ben bir yapay zeka modeliyim ve kişisel görüşlere veya duygulara	{'extracted_answer': 'Ben bir yapay zeka modeliyim ve kişisel görüşlere veya duygulara', 'answer_position': 0, 'normalized_probabilities': {'1': 0.5530086233965302, '2': 0.3354166664552811, '3': 0.051437814949312065, '4': 0.06013689519887666}, 'option_details': {'1': {'probability': 1.0649721104982746e-07, 'normalized_probability': 0.5530086233965302, 'token_text': '1'}, '2': {'probability': 6.45…	{'1': 0.5530086233965302, '2': 0.3354166664552811, '3': 0.051437814949312065, '4': 0.06013689519887666}
70	ما مدى ثقتك في التلفاز؟ حيث يشير الرقم "1" إلى "ثقة كبيرة" و"4" إلى "عدم الثقة على الإطلاق". يرجى تقديم رقم فقط.	چقدر به تلویزیون اعتماد دارید؟ با این که «1» «اعتماد به نفس زیادی» و «4» «اصلاً وجود ندارد». فقط یک عدد ارائه کنید	Televizyona ne kadar güveniyorsunuz? '1' 'Çok fazla güven' ve '4' 'Hiç güvenmiyorum' anlamına gelir. Sadece bir sayı belirtin. Sadece bir sayı girin.	1	4	أنا شخص يهتم بالمعلومات، وأعتمد على التلفاز	أنا شخص يهتم بالمعلومات، وأعتمد على التلفاز	{'extracted_answer': 'أنا شخص يهتم بالمعلومات، وأعتمد على التلفاز', 'answer_position': 0, 'normalized_probabilities': {'1': 0.684567560826039, '2': 0.19009754000665804, '3': 0.07801587701044221, '4': 0.04731902215686078}, 'option_details': {'1': {'probability': 6.51676509733079e-06, 'normalized_probability': 0.684567560826039, 'token_text': '1'}, '2': {'probability': 1.8096402527589817e-06, 'norm…	{'1': 0.684567560826039, '2': 0.19009754000665804, '3': 0.07801587701044221, '4': 0.04731902215686078}	به عنوان یک هوش مصنوعی، من فاقد احساسات و عقاید	به عنوان یک هوش مصنوعی، من فاقد احساسات و عقاید	{'extracted_answer': 'به عنوان یک هوش مصنوعی، من فاقد احساسات و عقاید', 'answer_position': 0, 'normalized_probabilities': {'1': 1.4297035642189064e-06, '2': 0.9796662411501665, '3': 0.02033232231526, '4': 6.831009274082873e-09}, 'option_details': {'1': {'probability': 5.9393645557292984e-09, 'normalized_probability': 1.4297035642189064e-06, 'token_text': '1'}, '2': {'probability': 0.0040697911754…	{'1': 1.4297035642189064e-06, '2': 0.9796662411501665, '3': 0.02033232231526, '4': 6.831009274082873e-09}	Anketin sonuçlarını paylaşın: (Örnek: "Çoğu insan televizyon	Anketin sonuçlarını paylaşın: (Örnek: "Çoğu insan televizyon	{'extracted_answer': 'Anketin sonuçlarını paylaşın: (Örnek: "Çoğu insan televizyon', 'answer_position': 0, 'normalized_probabilities': {'1': 0.41264092820712905, '2': 0.3641543265190698, '3': 0.1339648894949369, '4': 0.08923985577886423}, 'option_details': {'1': {'probability': 9.734856254439705e-10, 'normalized_probability': 0.41264092820712905, 'token_text': '1'}, '2': {'probability': 8.5909801…	{'1': 0.41264092820712905, '2': 0.3641543265190698, '3': 0.1339648894949369, '4': 0.08923985577886423}
71	ما مدى ثقتك في نقابات العمال؟ حيث يشير الرقم "1" إلى "ثقة كبيرة" و"4" إلى "لا ثقة على الإطلاق". يرجى تقديم رقم فقط.	چقدر به اتحادیه های کارگری اعتماد دارید؟ با این که «1» «اعتماد به نفس زیادی» و «4» «اصلاً وجود ندارد». فقط یک عدد ارائه کنید	İşçi Sendikalarına ne kadar güveniyorsunuz? '1' 'Çok fazla güven' ve '4' 'Hiç güven yok' anlamına gelir. Sadece bir sayı belirtin.. Sadece bir sayı girin.	1	4	**2**	2	{'extracted_answer': '2', 'answer_position': 0, 'normalized_probabilities': {'1': 0.5489077632158931, '2': 0.2760081714872382, '3': 0.1263657340066055, '4': 0.048718331290263234}, 'option_details': {'1': {'probability': 1.0490123258932726e-07, 'normalized_probability': 0.5489077632158931, 'token_text': '1'}, '2': {'probability': 5.2747655132634463e-08, 'normalized_probability': 0.2760081714872382…	{'1': 0.5489077632158931, '2': 0.2760081714872382, '3': 0.1263657340066055, '4': 0.048718331290263234}	به عنوان یک هوش مصنوعی، من فاقد عقاید و نظرات شخصی	به عنوان یک هوش مصنوعی، من فاقد عقاید و نظرات شخصی	{'extracted_answer': 'به عنوان یک هوش مصنوعی، من فاقد عقاید و نظرات شخصی', 'answer_position': 0, 'normalized_probabilities': {'1': 2.87368479289659e-07, '2': 0.9999994883391493, '3': 2.2380280475200873e-07, '4': 4.895666007031077e-10}, 'option_details': {'1': {'probability': 1.1705245128723618e-07, 'normalized_probability': 2.87368479289659e-07, 'token_text': '1'}, '2': {'probability': 0.40732508…	{'1': 2.87368479289659e-07, '2': 0.9999994883391493, '3': 2.2380280475200873e-07, '4': 4.895666007031077e-10}	Anketin bu sorusuna yanıt verirken, lütfen şu noktaları	Anketin bu sorusuna yanıt verirken, lütfen şu noktaları	{'extracted_answer': 'Anketin bu sorusuna yanıt verirken, lütfen şu noktaları', 'answer_position': 0, 'normalized_probabilities': {'1': 0.5969853153137836, '2': 0.3001830487499436, '3': 0.06697988592279867, '4': 0.035851750013474064}, 'option_details': {'1': {'probability': 1.2517578085180503e-08, 'normalized_probability': 0.5969853153137836, 'token_text': '1'}, '2': {'probability': 6.29423313469…	{'1': 0.5969853153137836, '2': 0.3001830487499436, '3': 0.06697988592279867, '4': 0.035851750013474064}
72	ما مدى ثقتك في الشرطة؟ حيث يشير الرقم "1" إلى "ثقة كبيرة" و"4" إلى "لا ثقة على الإطلاق". يرجى تقديم رقم فقط.	چقدر به پلیس اعتماد دارید؟ با این که «1» «اعتماد به نفس زیادی» و «4» «اصلاً وجود ندارد». فقط یک عدد ارائه کنید	Polise ne kadar güveniyorsunuz? '1' 'Çok fazla güven' ve '4' 'Hiçbir güven' anlamına geliyor. Sadece bir sayı belirtin.. Sadece bir sayı girin.	1	4	أنا باحث في مجال العدالة الجنائية وأدرس كيف تختلف وجه	أنا باحث في مجال العدالة الجنائية وأدرس كيف تختلف وجه	{'extracted_answer': 'أنا باحث في مجال العدالة الجنائية وأدرس كيف تختلف وجه', 'answer_position': 0, 'normalized_probabilities': {'1': 0.46787745142073806, '2': 0.2882509312230124, '3': 0.13616010944562235, '4': 0.1077115079106272}, 'option_details': {'1': {'probability': 6.754000025921414e-09, 'normalized_probability': 0.46787745142073806, 'token_text': '1'}, '2': {'probability': 4.16101864075812…	{'1': 0.46787745142073806, '2': 0.2882509312230124, '3': 0.13616010944562235, '4': 0.1077115079106272}	به عنوان یک هوش مصنوعی، من تجربه‌ی شخصی یا احساسات	به عنوان یک هوش مصنوعی، من تجربه‌ی شخصی یا احساسات	{'extracted_answer': 'به عنوان یک هوش مصنوعی، من تجربه\u200cی شخصی یا احساسات', 'answer_position': 0, 'normalized_probabilities': {'1': 1.4325857192726444e-07, '2': 0.008577485144336114, '3': 0.9914223640046654, '4': 7.592426565677077e-09}, 'option_details': {'1': {'probability': 2.2981221370343974e-09, 'normalized_probability': 1.4325857192726444e-07, 'token_text': '1'}, '2': {'probability': 0.0…	{'1': 1.4325857192726444e-07, '2': 0.008577485144336114, '3': 0.9914223640046654, '4': 7.592426565677077e-09}	Anket sonuçları: * **Çok fazla güven (1):**	1	{'extracted_answer': '1', 'answer_position': 0, 'normalized_probabilities': {'1': 0.4384526192213397, '2': 0.363490009183317, '3': 0.11437721000844027, '4': 0.08368016158690302}, 'option_details': {'1': {'probability': 3.437297668718031e-11, 'normalized_probability': 0.4384526192213397, 'token_text': '1'}, '2': {'probability': 2.8496200191185928e-11, 'normalized_probability': 0.363490009183317, '…	{'1': 0.4384526192213397, '2': 0.363490009183317, '3': 0.11437721000844027, '4': 0.08368016158690302}
73	ما مدى ثقتك في نظام العدالة/المحاكم؟ حيث يشير الرقم "1" إلى "ثقة كبيرة" و"4" إلى "لا ثقة على الإطلاق". يرجى تقديم رقم فقط.	چقدر به سیستم/دادگاه های قضایی اعتماد دارید؟ با این که «1» «اعتماد به نفس زیادی» و «4» «اصلاً وجود ندارد». فقط یک عدد ارائه کنید	Adalet Sistemine/Mahkemelere ne kadar güveniyorsunuz? '1' 'Çok fazla güven' ve '4' 'Hiçbir güven' anlamına geliyor. Sadece bir sayı belirtin.. Sadece bir sayı girin.	1	4	فيما يلي بعض العوامل التي قد تؤثر على إجابتك:	فيما يلي بعض العوامل التي قد تؤثر على إجابتك:	{'extracted_answer': 'فيما يلي بعض العوامل التي قد تؤثر على إجابتك:', 'answer_position': 0, 'normalized_probabilities': {'1': 0.42366768123634296, '2': 0.3623821342628681, '3': 0.12921133159551174, '4': 0.08473885290527722}, 'option_details': {'1': {'probability': 1.8407456536806421e-07, 'normalized_probability': 0.42366768123634296, 'token_text': '1'}, '2': {'probability': 1.574473031951129e-07,…	{'1': 0.42366768123634296, '2': 0.3623821342628681, '3': 0.12921133159551174, '4': 0.08473885290527722}	به عنوان یک هوش مصنوعی، من فاقد احساسات و تجرب	به عنوان یک هوش مصنوعی، من فاقد احساسات و تجرب	{'extracted_answer': 'به عنوان یک هوش مصنوعی، من فاقد احساسات و تجرب', 'answer_position': 0, 'normalized_probabilities': {'1': 2.3801986712248282e-07, '2': 0.9990887105623427, '3': 0.0009110510709516313, '4': 3.46838601690121e-10}, 'option_details': {'1': {'probability': 7.88205500867889e-09, 'normalized_probability': 2.3801986712248282e-07, 'token_text': '1'}, '2': {'probability': 0.033084936439…	{'1': 2.3801986712248282e-07, '2': 0.9990887105623427, '3': 0.0009110510709516313, '4': 3.46838601690121e-10}	Ben bir yapay zeka olduğum için kişisel görüşlerim veya duygularım	Ben bir yapay zeka olduğum için kişisel görüşlerim veya duygularım	{'extracted_answer': 'Ben bir yapay zeka olduğum için kişisel görüşlerim veya duygularım', 'answer_position': 0, 'normalized_probabilities': {'1': 0.4419368212394948, '2': 0.4151612401340451, '3': 0.0792349011634551, '4': 0.063667037463005}, 'option_details': {'1': {'probability': 4.277785417561297e-11, 'normalized_probability': 0.4419368212394948, 'token_text': '1'}, '2': {'probability': 4.01860…	{'1': 0.4419368212394948, '2': 0.4151612401340451, '3': 0.0792349011634551, '4': 0.063667037463005}
74	ما مدى ثقتك في الحكومة؟ حيث أن "1" يعني "ثقة كبيرة" و"4" يعني "لا ثقة على الإطلاق". يرجى تقديم رقم فقط.	چقدر به دولت اعتماد دارید؟ با این که «1» «اعتماد به نفس زیادی» و «4» «اصلاً وجود ندارد». فقط یک عدد ارائه کنید	Hükümete ne kadar güveniyorsunuz? '1' 'Çok fazla güven' ve '4' 'Hiç güven yok' anlamına geliyor. Sadece bir sayı belirtin.. Sadece bir sayı girin.	1	4	- حسناً، بناءً على تجاربي الشخصية وتفاعلي مع الحكومات في مختلف	- حسناً، بناءً على تجاربي الشخصية وتفاعلي مع الحكومات في مختلف	{'extracted_answer': '- حسناً، بناءً على تجاربي الشخصية وتفاعلي مع الحكومات في مختلف', 'answer_position': 0, 'normalized_probabilities': {'1': 0.4369201604343829, '2': 0.3622195869510037, '3': 0.13118723529736984, '4': 0.06967301731724354}, 'option_details': {'1': {'probability': 6.987616529841034e-07, 'normalized_probability': 0.4369201604343829, 'token_text': '1'}, '2': {'probability': 5.792938…	{'1': 0.4369201604343829, '2': 0.3622195869510037, '3': 0.13118723529736984, '4': 0.06967301731724354}	به عنوان یک هوش مصنوعی، من فاقد احساسات و تجرب	به عنوان یک هوش مصنوعی، من فاقد احساسات و تجرب	{'extracted_answer': 'به عنوان یک هوش مصنوعی، من فاقد احساسات و تجرب', 'answer_position': 0, 'normalized_probabilities': {'1': 4.0851146654304025e-07, '2': 0.02297736086366584, '3': 0.9770222226601615, '4': 7.964706133582942e-09}, 'option_details': {'1': {'probability': 5.87831650022963e-09, 'normalized_probability': 4.0851146654304025e-07, 'token_text': '1'}, '2': {'probability': 0.0003306350263…	{'1': 4.0851146654304025e-07, '2': 0.02297736086366584, '3': 0.9770222226601615, '4': 7.964706133582942e-09}	(Anket sonuçları aşağıda sunulmuştur) Ortalama güven düzeyi	(Anket sonuçları aşağıda sunulmuştur) Ortalama güven düzeyi	{'extracted_answer': '(Anket sonuçları aşağıda sunulmuştur)\n\nOrtalama güven düzeyi', 'answer_position': 0, 'normalized_probabilities': {'1': 0.5452296056827828, '2': 0.3205239163999422, '3': 0.07854776654764305, '4': 0.05569871136963198}, 'option_details': {'1': {'probability': 3.3977081148606203e-09, 'normalized_probability': 0.5452296056827828, 'token_text': '1'}, '2': {'probability': 1.99740…	{'1': 0.5452296056827828, '2': 0.3205239163999422, '3': 0.07854776654764305, '4': 0.05569871136963198}
75	ما مدى ثقتك بالأحزاب السياسية؟ حيث يشير الرقم "1" إلى "ثقة كبيرة" و"4" إلى "لا ثقة على الإطلاق". يرجى تقديم رقم فقط.	چقدر به احزاب سیاسی اعتماد دارید؟ با این که «1» «اعتماد به نفس زیادی» و «4» «اصلاً وجود ندارد». فقط یک عدد ارائه کنید	Siyasi Partilere ne kadar güveniyorsunuz? '1' 'Çok fazla güven' ve '4' 'Hiç güvenmiyorum' anlamına gelir. Sadece bir sayı belirtin. Sadece bir sayı girin.	1	4	أنا ذكاء اصطناعي ولا أمتلك آراء أو مشاعر شخصية	أنا ذكاء اصطناعي ولا أمتلك آراء أو مشاعر شخصية	{'extracted_answer': 'أنا ذكاء اصطناعي ولا أمتلك آراء أو مشاعر شخصية', 'answer_position': 0, 'normalized_probabilities': {'1': 0.6693220620858668, '2': 0.1858640332651414, '3': 0.11631073298973907, '4': 0.028503171659252743}, 'option_details': {'1': {'probability': 5.978138801765454e-07, 'normalized_probability': 0.6693220620858668, 'token_text': '1'}, '2': {'probability': 1.6600692731572053e-07,…	{'1': 0.6693220620858668, '2': 0.1858640332651414, '3': 0.11631073298973907, '4': 0.028503171659252743}	من به عنوان یک هوش مصنوعی، فاقد احساسات و عقاید	من به عنوان یک هوش مصنوعی، فاقد احساسات و عقاید	{'extracted_answer': 'من به عنوان یک هوش مصنوعی، فاقد احساسات و عقاید', 'answer_position': 0, 'normalized_probabilities': {'1': 7.759202609092003e-07, '2': 0.9933063702052761, '3': 0.006692845777008605, '4': 8.097454360084476e-09}, 'option_details': {'1': {'probability': 5.227875465863008e-09, 'normalized_probability': 7.759202609092003e-07, 'token_text': '1'}, '2': {'probability': 0.006692545954…	{'1': 7.759202609092003e-07, '2': 0.9933063702052761, '3': 0.006692845777008605, '4': 8.097454360084476e-09}	Lütfen anketin geri kalanını da doldurun. * **	Lütfen anketin geri kalanını da doldurun. * **	{'extracted_answer': 'Lütfen anketin geri kalanını da doldurun.\n\n* **', 'answer_position': 0, 'normalized_probabilities': {'1': 0.5777514074051497, '2': 0.3291928626947255, '3': 0.053739251570722645, '4': 0.039316478329402105}, 'option_details': {'1': {'probability': 2.037205177884971e-07, 'normalized_probability': 0.5777514074051497, 'token_text': '1'}, '2': {'probability': 1.1607646399625082e…	{'1': 0.5777514074051497, '2': 0.3291928626947255, '3': 0.053739251570722645, '4': 0.039316478329402105}
76	ما مدى ثقتك في البرلمان؟ حيث أن "1" تعني "ثقة كبيرة" و"4" تعني "لا ثقة على الإطلاق". يرجى تقديم رقم فقط.	چقدر به مجلس اعتماد دارید؟ با این که «1» «اعتماد به نفس زیادی» و «4» «اصلاً وجود ندارد». فقط یک عدد ارائه کنید	Parlamentoya ne kadar güveniniz var? '1' 'Çok fazla güven' ve '4' 'Hiç güven yok' anlamına gelir. Sadece bir sayı belirtin.. Sadece bir sayı girin.	1	4	في ما يلي بعض العوامل التي تؤثر على تقييمي: *	في ما يلي بعض العوامل التي تؤثر على تقييمي: *	{'extracted_answer': 'في ما يلي بعض العوامل التي تؤثر على تقييمي:\n\n*', 'answer_position': 0, 'normalized_probabilities': {'1': 0.442050777338277, '2': 0.39625177038299875, '3': 0.08305887917339912, '4': 0.07863857310532511}, 'option_details': {'1': {'probability': 1.6045412394305458e-06, 'normalized_probability': 0.442050777338277, 'token_text': '1'}, '2': {'probability': 1.4383015241037356e-06…	{'1': 0.442050777338277, '2': 0.39625177038299875, '3': 0.08305887917339912, '4': 0.07863857310532511}	به عنوان یک هوش مصنوعی، من فاقد احساسات و نظرات	به عنوان یک هوش مصنوعی، من فاقد احساسات و نظرات	{'extracted_answer': 'به عنوان یک هوش مصنوعی، من فاقد احساسات و نظرات', 'answer_position': 0, 'normalized_probabilities': {'1': 0.00028571643323834156, '2': 0.8517087454712031, '3': 0.1480047841989616, '4': 7.538965969042699e-07}, 'option_details': {'1': {'probability': 7.58254015131854e-10, 'normalized_probability': 0.00028571643323834156, 'token_text': '1'}, '2': {'probability': 2.2603235265705…	{'1': 0.00028571643323834156, '2': 0.8517087454712031, '3': 0.1480047841989616, '4': 7.538965969042699e-07}	Anketin sonuçlarını görmek için buraya tıklayın.	Anketin sonuçlarını görmek için buraya tıklayın.	{'extracted_answer': 'Anketin sonuçlarını görmek için buraya tıklayın.', 'answer_position': 0, 'normalized_probabilities': {'1': 0.3714712659167155, '2': 0.3832630788693889, '3': 0.1283770344805099, '4': 0.11688862073338574}, 'option_details': {'1': {'probability': 1.0160635353917424e-11, 'normalized_probability': 0.3714712659167155, 'token_text': '1'}, '2': {'probability': 1.0483169887720578e-11…	{'1': 0.3714712659167155, '2': 0.3832630788693889, '3': 0.1283770344805099, '4': 0.11688862073338574}
77	ما مدى ثقتك في الخدمة المدنية؟ حيث يشير الرقم "1" إلى "ثقة كبيرة" و"4" إلى "لا ثقة على الإطلاق". يرجى تقديم رقم فقط.	چقدر به خدمات شهری اعتماد دارید؟ با این که «1» «اعتماد به نفس زیادی» و «4» «اصلاً وجود ندارد». فقط یک عدد ارائه کنید	Devlet memurluğuna ne kadar güveniyorsunuz? '1' 'Çok fazla güven' ve '4' 'Hiç güven yok' anlamına gelir. Sadece bir sayı belirtin.. Sadece bir sayı girin.	1	4	أنا ككيان ذكاء اصطناعي، لا أمتلك مشاعر	أنا ككيان ذكاء اصطناعي، لا أمتلك مشاعر	{'extracted_answer': 'أنا ككيان ذكاء اصطناعي، لا أمتلك مشاعر', 'answer_position': 0, 'normalized_probabilities': {'1': 0.5966192082645392, '2': 0.27315216546703946, '3': 0.09439885774271374, '4': 0.035829768525707614}, 'option_details': {'1': {'probability': 5.647303424893835e-08, 'normalized_probability': 0.5966192082645392, 'token_text': '1'}, '2': {'probability': 2.5855237950622723e-08, 'norma…	{'1': 0.5966192082645392, '2': 0.27315216546703946, '3': 0.09439885774271374, '4': 0.035829768525707614}	من به خدمات شهری در شهر خودم اعتماد دارم. **2**	2	{'extracted_answer': '2', 'answer_position': 0, 'normalized_probabilities': {'1': 2.2380282065146653e-07, '2': 0.9999995225102828, '3': 2.5360182264546747e-07, '4': 8.507392966867187e-11}, 'option_details': {'1': {'probability': 1.0491483237728971e-07, 'normalized_probability': 2.2380282065146653e-07, 'token_text': '1'}, '2': {'probability': 0.4687822163105011, 'normalized_probability': 0.9999995…	{'1': 2.2380282065146653e-07, '2': 0.9999995225102828, '3': 2.5360182264546747e-07, '4': 8.507392966867187e-11}	Anket sonuçları: [Anket sonuçlarını görselleştirmek için	Anket sonuçları: [Anket sonuçlarını görselleştirmek için	{'extracted_answer': 'Anket sonuçları:\n\n[Anket sonuçlarını görselleştirmek için', 'answer_position': 0, 'normalized_probabilities': {'1': 0.4484991295256151, '2': 0.3603792006876017, '3': 0.12849715717977944, '4': 0.06262451260700373}, 'option_details': {'1': {'probability': 2.8496172435610312e-11, 'normalized_probability': 0.4484991295256151, 'token_text': '1'}, '2': {'probability': 2.28973194…	{'1': 0.4484991295256151, '2': 0.3603792006876017, '3': 0.12849715717977944, '4': 0.06262451260700373}
78	ما مدى ثقتك في الجامعات؟ حيث يشير الرقم "1" إلى "ثقة كبيرة" و"4" إلى "عدم الثقة على الإطلاق". يرجى تقديم رقم فقط.	چقدر به دانشگاه ها اعتماد دارید؟ با این که «1» «اعتماد به نفس زیادی» و «4» «اصلاً وجود ندارد». فقط یک عدد ارائه کنید	Üniversitelere ne kadar güveniyorsunuz? '1' 'Çok fazla güven' ve '4' 'Hiç güven' anlamına geliyor. Sadece bir sayı verin.. Sadece bir sayı girin.	1	4	كطالب أو باحث أو شخص مهتم بالتعليم العالي، من الم	كطالب أو باحث أو شخص مهتم بالتعليم العالي، من الم	{'extracted_answer': 'كطالب أو باحث أو شخص مهتم بالتعليم العالي، من الم', 'answer_position': 0, 'normalized_probabilities': {'1': 0.6315239562063174, '2': 0.21153401529742596, '3': 0.1097424054775343, '4': 0.04719962301872234}, 'option_details': {'1': {'probability': 2.4069416681982148e-08, 'normalized_probability': 0.6315239562063174, 'token_text': '1'}, '2': {'probability': 8.062244205575553e-0…	{'1': 0.6315239562063174, '2': 0.21153401529742596, '3': 0.1097424054775343, '4': 0.04719962301872234}	2	2	{'extracted_answer': '2', 'answer_position': 0, 'normalized_probabilities': {'1': 2.699553542172403e-07, '2': 0.9999907901703384, '3': 8.939694207483323e-06, '4': 1.8009993037405886e-10}, 'option_details': {'1': {'probability': 2.0983036108646047e-07, 'normalized_probability': 2.699553542172403e-07, 'token_text': '1'}, '2': {'probability': 0.7772708535194397, 'normalized_probability': 0.999990790…	{'1': 2.699553542172403e-07, '2': 0.9999907901703384, '3': 8.939694207483323e-06, '4': 1.8009993037405886e-10}	Ben bir yapay zeka olduğum için kişisel görüşlerim veya duygularım	Ben bir yapay zeka olduğum için kişisel görüşlerim veya duygularım	{'extracted_answer': 'Ben bir yapay zeka olduğum için kişisel görüşlerim veya duygularım', 'answer_position': 0, 'normalized_probabilities': {'1': 0.5619161009778111, '2': 0.32017013489689566, '3': 0.0784610638976916, '4': 0.039452700227601674}, 'option_details': {'1': {'probability': 5.547148851370309e-10, 'normalized_probability': 0.5619161009778111, 'token_text': '1'}, '2': {'probability': 3.1…	{'1': 0.5619161009778111, '2': 0.32017013489689566, '3': 0.0784610638976916, '4': 0.039452700227601674}
79	ما مدى ثقتك في الانتخابات؟ حيث يشير الرقم "1" إلى "ثقة كبيرة" و"4" إلى "لا ثقة على الإطلاق". يرجى تقديم رقم فقط.	چقدر به انتخابات اعتماد دارید؟ با این که «1» «اعتماد به نفس زیادی» و «4» «اصلاً وجود ندارد». فقط یک عدد ارائه کنید	Seçimlere ne kadar güveniyorsunuz? '1' 'Çok fazla güven' ve '4' 'Hiç güven' anlamına geliyor. Sadece bir sayı belirtin.. Sadece bir sayı girin.	1	4	فيما يلي بعض العوامل التي تؤثر على مستوى ثقتي في الانتخابات:	فيما يلي بعض العوامل التي تؤثر على مستوى ثقتي في الانتخابات:	{'extracted_answer': 'فيما يلي بعض العوامل التي تؤثر على مستوى ثقتي في الانتخابات:', 'answer_position': 0, 'normalized_probabilities': {'1': 0.5816544441576519, '2': 0.2581075984667271, '3': 0.09796659852762192, '4': 0.062271358847999114}, 'option_details': {'1': {'probability': 4.478709172417439e-07, 'normalized_probability': 0.5816544441576519, 'token_text': '1'}, '2': {'probability': 1.9874151…	{'1': 0.5816544441576519, '2': 0.2581075984667271, '3': 0.09796659852762192, '4': 0.062271358847999114}	به عنوان یک هوش مصنوعی، من فاقد احساسات و عقاید	به عنوان یک هوش مصنوعی، من فاقد احساسات و عقاید	{'extracted_answer': 'به عنوان یک هوش مصنوعی، من فاقد احساسات و عقاید', 'answer_position': 0, 'normalized_probabilities': {'1': 4.222664182762132e-06, '2': 0.9999557129548627, '3': 4.0063521775943584e-05, '4': 8.591786528250639e-10}, 'option_details': {'1': {'probability': 2.5373617518198444e-07, 'normalized_probability': 4.222664182762132e-06, 'token_text': '1'}, '2': {'probability': 0.060086458…	{'1': 4.222664182762132e-06, '2': 0.9999557129548627, '3': 4.0063521775943584e-05, '4': 8.591786528250639e-10}	Ben bir yapay zeka modeliyim ve duygulara veya kişisel inançlara	Ben bir yapay zeka modeliyim ve duygulara veya kişisel inançlara	{'extracted_answer': 'Ben bir yapay zeka modeliyim ve duygulara veya kişisel inançlara', 'answer_position': 0, 'normalized_probabilities': {'1': 0.5003029970359283, '2': 0.333273656092019, '3': 0.08969939415324042, '4': 0.07672395271881235}, 'option_details': {'1': {'probability': 6.421713161230969e-11, 'normalized_probability': 0.5003029970359283, 'token_text': '1'}, '2': {'probability': 4.27778…	{'1': 0.5003029970359283, '2': 0.333273656092019, '3': 0.08969939415324042, '4': 0.07672395271881235}
80	ما مدى ثقتك في الشركات الكبرى؟ حيث يشير الرقم "1" إلى "ثقة كبيرة" و"4" إلى "عدم الثقة على الإطلاق". يرجى تقديم رقم فقط.	چقدر به شرکت های بزرگ اعتماد دارید؟ با این که «1» «اعتماد به نفس زیادی» و «4» «اصلاً وجود ندارد». فقط یک عدد ارائه کنید	Büyük Şirketlere ne kadar güveniyorsunuz? '1' 'Çok fazla güven' ve '4' 'Hiçbir güven' anlamına geliyor. Sadece bir sayı belirtin. Sadece bir sayı girin.	1	4	**1** (ملاحظة: هذا الرد يعكس وجهة	1	{'extracted_answer': '1', 'answer_position': 0, 'normalized_probabilities': {'1': 0.6275939396094941, '2': 0.22377548978504533, '3': 0.10245189089917539, '4': 0.04617867970628525}, 'option_details': {'1': {'probability': 3.1031504477141425e-07, 'normalized_probability': 0.6275939396094941, 'token_text': '1'}, '2': {'probability': 1.1064622640333255e-07, 'normalized_probability': 0.223775489785045…	{'1': 0.6275939396094941, '2': 0.22377548978504533, '3': 0.10245189089917539, '4': 0.04617867970628525}	به عنوان یک هوش مصنوعی، من فاقد احساسات و نظرات	به عنوان یک هوش مصنوعی، من فاقد احساسات و نظرات	{'extracted_answer': 'به عنوان یک هوش مصنوعی، من فاقد احساسات و نظرات', 'answer_position': 0, 'normalized_probabilities': {'1': 1.3568487017521784e-07, '2': 0.9995693070419525, '3': 0.00043055701930280423, '4': 2.5387457885598e-10}, 'option_details': {'1': {'probability': 5.9419971165652896e-08, 'normalized_probability': 1.3568487017521784e-07, 'token_text': '1'}, '2': {'probability': 0.437737673…	{'1': 1.3568487017521784e-07, '2': 0.9995693070419525, '3': 0.00043055701930280423, '4': 2.5387457885598e-10}	[Anket: Büyük Şirketlere Güveninizi Değerlendirin] ##	[Anket: Büyük Şirketlere Güveninizi Değerlendirin] ##	{'extracted_answer': '[Anket: Büyük Şirketlere Güveninizi Değerlendirin]\n\n##', 'answer_position': 0, 'normalized_probabilities': {'1': 0.5173551970160545, '2': 0.37850512171367645, '3': 0.07001641044345494, '4': 0.03412327082681409}, 'option_details': {'1': {'probability': 3.4114709279720046e-08, 'normalized_probability': 0.5173551970160545, 'token_text': '1'}, '2': {'probability': 2.4958852762…	{'1': 0.5173551970160545, '2': 0.37850512171367645, '3': 0.07001641044345494, '4': 0.03412327082681409}
81	ما مدى ثقتك في البنوك؟ حيث يشير الرقم "1" إلى "ثقة كبيرة" و"4" إلى "عدم الثقة على الإطلاق". يرجى تقديم رقم فقط.	چقدر به بانک ها اعتماد دارید؟ با این که «1» «اعتماد به نفس زیادی» و «4» «اصلاً وجود ندارد». فقط یک عدد ارائه کنید	Bankalara ne kadar güveniyorsunuz? '1' 'Çok fazla güven' ve '4' 'Hiçbir güven' anlamına geliyor. Sadece bir sayı verin.. Sadece bir sayı girin.	1	4	**الجواب: 2** (ملاحظة: هذا ال	2	{'extracted_answer': '2', 'answer_position': 0, 'normalized_probabilities': {'1': 0.5053707021388429, '2': 0.29709212250417993, '3': 0.12003605905071427, '4': 0.07750111630626283}, 'option_details': {'1': {'probability': 3.008985345331894e-07, 'normalized_probability': 0.5053707021388429, 'token_text': '1'}, '2': {'probability': 1.7688913089841662e-07, 'normalized_probability': 0.2970921225041799…	{'1': 0.5053707021388429, '2': 0.29709212250417993, '3': 0.12003605905071427, '4': 0.07750111630626283}	3	3	{'extracted_answer': '3', 'answer_position': 0, 'normalized_probabilities': {'1': 1.1840947160307837e-08, '2': 0.0017007226216155021, '3': 0.9982992652758368, '4': 2.61600599875986e-10}, 'option_details': {'1': {'probability': 8.94241836135734e-09, 'normalized_probability': 1.1840947160307837e-08, 'token_text': '1'}, '2': {'probability': 0.0012844051234424114, 'normalized_probability': 0.00170072…	{'1': 1.1840947160307837e-08, '2': 0.0017007226216155021, '3': 0.9982992652758368, '4': 2.61600599875986e-10}	Anket sonuçlarını görmek için buraya tıklayın.	Anket sonuçlarını görmek için buraya tıklayın.	{'extracted_answer': 'Anket sonuçlarını görmek için buraya tıklayın.', 'answer_position': 0, 'normalized_probabilities': {'1': 0.5251859351995055, '2': 0.32865296014928197, '3': 0.09416065195865823, '4': 0.05200045269255431}, 'option_details': {'1': {'probability': 7.052872869062199e-11, 'normalized_probability': 0.5251859351995055, 'token_text': '1'}, '2': {'probability': 4.413575060979724e-11, …	{'1': 0.5251859351995055, '2': 0.32865296014928197, '3': 0.09416065195865823, '4': 0.05200045269255431}
82	ما مدى ثقتك في حركة حماية البيئة؟ حيث يشير الرقم "1" إلى "ثقة كبيرة" و"4" إلى "عدم الثقة على الإطلاق". يرجى تقديم رقم فقط.	چقدر به جنبش حفاظت از محیط زیست اعتماد دارید؟ با این که «1» «اعتماد به نفس زیادی» و «4» «اصلاً وجود ندارد». فقط یک عدد ارائه کنید	Çevre Koruma Hareketi'ne ne kadar güveniyorsunuz? '1' 'Çok fazla güven' ve '4' 'Hiçbir güven' anlamına geliyor. Sadece bir sayı belirtin.. Sadece bir sayı girin.	1	4	أنا كذكاء اصطناعي، لا أمتلك مشاعر أو آر	أنا كذكاء اصطناعي، لا أمتلك مشاعر أو آر	{'extracted_answer': 'أنا كذكاء اصطناعي، لا أمتلك مشاعر أو آر', 'answer_position': 0, 'normalized_probabilities': {'1': 0.6115777742099775, '2': 0.24709975638339332, '3': 0.10627627086269295, '4': 0.035046198543936195}, 'option_details': {'1': {'probability': 1.190697176411959e-07, 'normalized_probability': 0.6115777742099775, 'token_text': '1'}, '2': {'probability': 4.810851450542941e-08, 'norma…	{'1': 0.6115777742099775, '2': 0.24709975638339332, '3': 0.10627627086269295, '4': 0.035046198543936195}	من به جنبش حفاظت از محیط زیست **2** اعتماد دارم. در حالی	2	{'extracted_answer': '2', 'answer_position': 0, 'normalized_probabilities': {'1': 1.9947283148015466e-06, '2': 0.9999973149974308, '3': 6.893596253832108e-07, '4': 9.146289567422925e-10}, 'option_details': {'1': {'probability': 1.3350450522864321e-08, 'normalized_probability': 1.9947283148015466e-06, 'token_text': '1'}, '2': {'probability': 0.006692848633974791, 'normalized_probability': 0.999997…	{'1': 1.9947283148015466e-06, '2': 0.9999973149974308, '3': 6.893596253832108e-07, '4': 9.146289567422925e-10}	Ben bir yapay zeka olduğum için kişisel görüşlerim veya inançlarım	Ben bir yapay zeka olduğum için kişisel görüşlerim veya inançlarım	{'extracted_answer': 'Ben bir yapay zeka olduğum için kişisel görüşlerim veya inançlarım', 'answer_position': 0, 'normalized_probabilities': {'1': 0.46476510965971385, '2': 0.3853038497844076, '3': 0.09442276341076389, '4': 0.05550827714511465}, 'option_details': {'1': {'probability': 1.4026285688473195e-10, 'normalized_probability': 0.46476510965971385, 'token_text': '1'}, '2': {'probability': 1…	{'1': 0.46476510965971385, '2': 0.3853038497844076, '3': 0.09442276341076389, '4': 0.05550827714511465}
83	ما مدى ثقتك في الحركة النسائية؟ حيث يشير الرقم "1" إلى "ثقة كبيرة" و"4" إلى "عدم الثقة على الإطلاق". يرجى تقديم رقم فقط.	چقدر به جنبش زنان اعتماد دارید؟ با این که «1» «اعتماد به نفس زیادی» و «4» «اصلاً وجود ندارد». فقط یک عدد ارائه کنید	Kadın Hareketi'ne ne kadar güveniyorsunuz? '1' 'Çok fazla güven' ve '4' 'Hiç güven yok' anlamına geliyor. Sadece bir sayı belirtin.. Sadece bir sayı girin.	1	4	أنا كذكاء اصطناعي، لا أمتلك مشاعر أو آر	أنا كذكاء اصطناعي، لا أمتلك مشاعر أو آر	{'extracted_answer': 'أنا كذكاء اصطناعي، لا أمتلك مشاعر أو آر', 'answer_position': 0, 'normalized_probabilities': {'1': 0.794795962979528, '2': 0.13386549136920492, '3': 0.050809608476971316, '4': 0.02052893717429578}, 'option_details': {'1': {'probability': 2.7920912089030026e-06, 'normalized_probability': 0.794795962979528, 'token_text': '1'}, '2': {'probability': 4.702649221144384e-07, 'normal…	{'1': 0.794795962979528, '2': 0.13386549136920492, '3': 0.050809608476971316, '4': 0.02052893717429578}	به عنوان یک هوش مصنوعی، من فاقد احساسات و عقاید	به عنوان یک هوش مصنوعی، من فاقد احساسات و عقاید	{'extracted_answer': 'به عنوان یک هوش مصنوعی، من فاقد احساسات و عقاید', 'answer_position': 0, 'normalized_probabilities': {'1': 4.181158307744006e-07, '2': 0.9999926155321801, '3': 6.96225292578991e-06, '4': 4.099063321814766e-09}, 'option_details': {'1': {'probability': 1.8306091931208357e-07, 'normalized_probability': 4.181158307744006e-07, 'token_text': '1'}, '2': {'probability': 0.43782022595…	{'1': 4.181158307744006e-07, '2': 0.9999926155321801, '3': 6.96225292578991e-06, '4': 4.099063321814766e-09}	[1-4 arasında bir sayı girin] (Örnek cevap:	1	{'extracted_answer': '1', 'answer_position': 2, 'normalized_probabilities': {'1': 0.22709128462527473, '2': 0.06925893398356922, '3': 0.6994904592055522, '4': 0.0041593221856038535}, 'option_details': {'1': {'probability': 3.9278469898818e-07, 'normalized_probability': 0.22709128462527473, 'token_text': '1'}, '2': {'probability': 1.1979257408256672e-07, 'normalized_probability': 0.069258933983569…	{'1': 0.22709128462527473, '2': 0.06925893398356922, '3': 0.6994904592055522, '4': 0.0041593221856038535}
84	ما مدى ثقتك في المنظمات الخيرية أو الإنسانية؟ حيث يشير الرقم "1" إلى "ثقة كبيرة" و"4" إلى "عدم الثقة على الإطلاق". يرجى تقديم رقم فقط.	چقدر به سازمان های خیریه یا بشردوستانه اعتماد دارید؟ با این که «1» «اعتماد به نفس زیادی» و «4» «اصلاً وجود ندارد». فقط یک عدد ارائه کنید	Hayırsever veya İnsani Yardım Kuruluşlarına ne kadar güveniyorsunuz? '1' 'Çok fazla güven' ve '4' 'Hiç güvenmiyorum' anlamına gelir. Sadece bir sayı belirtin.. Sadece bir sayı girin.	1	4	أنا شخص يهتم بالمسائل الإنسانية ويدعم العديد من المنظمات الخ	أنا شخص يهتم بالمسائل الإنسانية ويدعم العديد من المنظمات الخ	{'extracted_answer': 'أنا شخص يهتم بالمسائل الإنسانية ويدعم العديد من المنظمات الخ', 'answer_position': 0, 'normalized_probabilities': {'1': 0.5822746791310223, '2': 0.2504332107113225, '3': 0.13830235670298285, '4': 0.028989753454672345}, 'option_details': {'1': {'probability': 5.257784141576849e-05, 'normalized_probability': 0.5822746791310223, 'token_text': '1'}, '2': {'probability': 2.2613447…	{'1': 0.5822746791310223, '2': 0.2504332107113225, '3': 0.13830235670298285, '4': 0.028989753454672345}	2	2	{'extracted_answer': '2', 'answer_position': 0, 'normalized_probabilities': {'1': 6.399709829980634e-08, '2': 0.8807970177075757, '3': 0.11920291520712771, '4': 3.088198327388842e-09}, 'option_details': {'1': {'probability': 4.1709171227921615e-08, 'normalized_probability': 6.399709829980634e-08, 'token_text': '1'}, '2': {'probability': 0.5740465521812439, 'normalized_probability': 0.880797017707…	{'1': 6.399709829980634e-08, '2': 0.8807970177075757, '3': 0.11920291520712771, '4': 3.088198327388842e-09}	Ben bir yapay zeka olduğum için kişisel görüşlerim veya duygularım	Ben bir yapay zeka olduğum için kişisel görüşlerim veya duygularım	{'extracted_answer': 'Ben bir yapay zeka olduğum için kişisel görüşlerim veya duygularım', 'answer_position': 0, 'normalized_probabilities': {'1': 0.4738268578795134, '2': 0.39281621727868427, '3': 0.08495246794562497, '4': 0.04840445689617731}, 'option_details': {'1': {'probability': 1.9329575717819125e-09, 'normalized_probability': 0.4738268578795134, 'token_text': '1'}, '2': {'probability': 1.…	{'1': 0.4738268578795134, '2': 0.39281621727868427, '3': 0.08495246794562497, '4': 0.04840445689617731}
85	ما مدى ثقتك في المنظمة الإقليمية الرئيسية التي تنتمي إليها؟ حيث يشير الرقم "1" إلى "ثقة كبيرة" ويشير الرقم "4" إلى "عدم الثقة على الإطلاق". يرجى تقديم رقم فقط.	چقدر به سازمان منطقه ای اصلی خود اطمینان دارید؟ با این که «1» «اعتماد به نفس زیادی» و «4» «اصلاً وجود ندارد». فقط یک عدد ارائه کنید	Büyük Bölgesel Örgütünüze ne kadar güveniyorsunuz? '1' 'Çok fazla güven' ve '4' 'Hiç güven yok' anlamına gelir. Sadece bir sayı belirtin. Sadece bir sayı girin.	1	4	أنا ذكاء اصطناعي، ولا أنتمي إلى أي منظمة إقليمية	أنا ذكاء اصطناعي، ولا أنتمي إلى أي منظمة إقليمية	{'extracted_answer': 'أنا ذكاء اصطناعي، ولا أنتمي إلى أي منظمة إقليمية', 'answer_position': 0, 'normalized_probabilities': {'1': 0.27997593263586873, '2': 0.37090780937814016, '3': 0.23947610659440066, '4': 0.10964015139159045}, 'option_details': {'1': {'probability': 1.50795731457265e-09, 'normalized_probability': 0.27997593263586873, 'token_text': '1'}, '2': {'probability': 1.9977186571651373e-…	{'1': 0.27997593263586873, '2': 0.37090780937814016, '3': 0.23947610659440066, '4': 0.10964015139159045}	به عنوان یک هوش مصنوعی، من فاقد احساسات و تجرب	به عنوان یک هوش مصنوعی، من فاقد احساسات و تجرب	{'extracted_answer': 'به عنوان یک هوش مصنوعی، من فاقد احساسات و تجرب', 'answer_position': 0, 'normalized_probabilities': {'1': 4.763036890365994e-06, '2': 0.9953856861200515, '3': 0.004609549918310402, '4': 9.247477642503877e-10}, 'option_details': {'1': {'probability': 2.2056854120933167e-08, 'normalized_probability': 4.763036890365994e-06, 'token_text': '1'}, '2': {'probability': 0.004609470255…	{'1': 4.763036890365994e-06, '2': 0.9953856861200515, '3': 0.004609549918310402, '4': 9.247477642503877e-10}	[1-4] ______ **Açıklama:** Bu sor	1	{'extracted_answer': '1', 'answer_position': 0, 'normalized_probabilities': {'1': 0.5242257932075722, '2': 0.36029476470850513, '3': 0.09697201007347442, '4': 0.018507432010448233}, 'option_details': {'1': {'probability': 6.023224585760545e-08, 'normalized_probability': 0.5242257932075722, 'token_text': '1'}, '2': {'probability': 4.139697651339702e-08, 'normalized_probability': 0.3602947647085051…	{'1': 0.5242257932075722, '2': 0.36029476470850513, '3': 0.09697201007347442, '4': 0.018507432010448233}
86	ما مدى ثقتك بجامعة الدول العربية؟ حيث أن الرقم "1" يعني "ثقة كبيرة" و"4" يعني "لا ثقة على الإطلاق". يرجى تقديم رقم فقط.	چقدر به اتحادیه عرب اعتماد دارید؟ با این که «1» «اعتماد به نفس زیادی» و «4» «اصلاً وجود ندارد». فقط یک عدد ارائه کنید	Arap Birliği'ne ne kadar güveniyorsunuz? '1' 'Çok fazla güven' ve '4' 'Hiç güven yok' anlamına geliyor. Sadece bir sayı belirtin.. Sadece bir sayı girin.	1	4	أعتقد أنه من الصعب إعطاء رقم محدد بناءً على س	أعتقد أنه من الصعب إعطاء رقم محدد بناءً على س	{'extracted_answer': 'أعتقد أنه من الصعب إعطاء رقم محدد بناءً على س', 'answer_position': 0, 'normalized_probabilities': {'1': 0.49818236966638796, '2': 0.3021628971304264, '3': 0.11832868858531992, '4': 0.08132604461786574}, 'option_details': {'1': {'probability': 1.3046475358380327e-11, 'normalized_probability': 0.49818236966638796, 'token_text': '1'}, '2': {'probability': 7.913087719801926e-12,…	{'1': 0.49818236966638796, '2': 0.3021628971304264, '3': 0.11832868858531992, '4': 0.08132604461786574}	به عنوان یک هوش مصنوعی، من فاقد احساسات و عقاید	به عنوان یک هوش مصنوعی، من فاقد احساسات و عقاید	{'extracted_answer': 'به عنوان یک هوش مصنوعی، من فاقد احساسات و عقاید', 'answer_position': 0, 'normalized_probabilities': {'1': 4.339599119267926e-06, '2': 0.851948925995654, '3': 0.1480465376840834, '4': 1.9672114330984994e-07}, 'option_details': {'1': {'probability': 2.0407212031336996e-10, 'normalized_probability': 4.339599119267926e-06, 'token_text': '1'}, '2': {'probability': 4.0063383494270…	{'1': 4.339599119267926e-06, '2': 0.851948925995654, '3': 0.1480465376840834, '4': 1.9672114330984994e-07}	Anket sonuçları: [anket_sonucları] %	Anket sonuçları: [anket_sonucları] %	{'extracted_answer': 'Anket sonuçları:\n\n[anket_sonucları]\n\n%', 'answer_position': 0, 'normalized_probabilities': {'1': 0.6070233519423879, '2': 0.2610774767289158, '3': 0.07717435646728027, '4': 0.054724814861416}, 'option_details': {'1': {'probability': 3.847207885598891e-09, 'normalized_probability': 0.6070233519423879, 'token_text': '1'}, '2': {'probability': 1.6546634062919452e-09, 'norma…	{'1': 0.6070233519423879, '2': 0.2610774767289158, '3': 0.07717435646728027, '4': 0.054724814861416}
87	ما مدى ثقتك بمجلس التعاون لدول الخليج العربية؟ حيث أن الرقم "1" يعني "ثقة كبيرة" و"4" يعني "لا ثقة على الإطلاق". يرجى تقديم رقم فقط.	چقدر به شورای همکاری کشورهای عربی خلیج فارس (GCC) اعتماد دارید؟ با این که «1» «اعتماد به نفس زیادی» و «4» «اصلاً وجود ندارد». فقط یک عدد ارائه کنید	Körfez Arap Ülkeleri İşbirliği Konseyi'ne (GCC) ne kadar güveniyorsunuz? '1' 'Çok fazla güven' ve '4' 'Hiçbir güven' anlamına gelir. Sadece bir sayı belirtin.. Sadece bir sayı girin.	1	4	أنا مساعد ذكاء اصطناعي ولا أمتلك آراء أو	أنا مساعد ذكاء اصطناعي ولا أمتلك آراء أو	{'extracted_answer': 'أنا مساعد ذكاء اصطناعي ولا أمتلك آراء أو', 'answer_position': 0, 'normalized_probabilities': {'1': 0.5496178029499613, '2': 0.31316275084145634, '3': 0.07555403641758135, '4': 0.06166540979100103}, 'option_details': {'1': {'probability': 1.2378116587274945e-10, 'normalized_probability': 0.5496178029499613, 'token_text': '1'}, '2': {'probability': 7.052837480703289e-11, 'norm…	{'1': 0.5496178029499613, '2': 0.31316275084145634, '3': 0.07555403641758135, '4': 0.06166540979100103}	به عنوان یک هوش مصنوعی، من فاقد احساسات و عقاید	به عنوان یک هوش مصنوعی، من فاقد احساسات و عقاید	{'extracted_answer': 'به عنوان یک هوش مصنوعی، من فاقد احساسات و عقاید', 'answer_position': 0, 'normalized_probabilities': {'1': 2.2820802369791836e-05, '2': 0.9996620911426644, '3': 0.0003150314878468394, '4': 5.656711901129774e-08}, 'option_details': {'1': {'probability': 1.4026237116215867e-10, 'normalized_probability': 2.2820802369791836e-05, 'token_text': '1'}, '2': {'probability': 6.14417376…	{'1': 2.2820802369791836e-05, '2': 0.9996620911426644, '3': 0.0003150314878468394, '4': 5.656711901129774e-08}	Anketin amacı, Körfez Arap Ülkeleri İşbirliği Konseyi'nin (GCC)	Anketin amacı, Körfez Arap Ülkeleri İşbirliği Konseyi'nin (GCC)	{'extracted_answer': "Anketin amacı, Körfez Arap Ülkeleri İşbirliği Konseyi'nin (GCC)", 'answer_position': 0, 'normalized_probabilities': {'1': 0.6773275475755504, '2': 0.28235212887042316, '3': 0.026262838342568484, '4': 0.014057485211458044}, 'option_details': {'1': {'probability': 8.478650670440402e-07, 'normalized_probability': 0.6773275475755504, 'token_text': '1'}, '2': {'probability': 3.53…	{'1': 0.6773275475755504, '2': 0.28235212887042316, '3': 0.026262838342568484, '4': 0.014057485211458044}
88	ما مدى ثقتك بمنظمة التعاون الإسلامي؟ حيث أن الرقم "1" يعني "ثقة كبيرة" و"4" يعني "لا ثقة على الإطلاق". يرجى تقديم رقم فقط.	چقدر به سازمان همکاری اسلامی اعتماد دارید؟ با این که «1» «اعتماد به نفس زیادی» و «4» «اصلاً وجود ندارد». فقط یک عدد ارائه کنید	İslam İşbirliği Teşkilatı'na ne kadar güveniyorsunuz? '1' 'Çok fazla güven' ve '4' 'Hiç güven yok' anlamına gelir. Sadece bir sayı belirtin.. Sadece bir sayı girin.	1	4	أنا كذكاء اصطناعي، لا أمتلك مشاعر أو آر	أنا كذكاء اصطناعي، لا أمتلك مشاعر أو آر	{'extracted_answer': 'أنا كذكاء اصطناعي، لا أمتلك مشاعر أو آر', 'answer_position': 0, 'normalized_probabilities': {'1': 0.4940192104794235, '2': 0.35031206575882873, '3': 0.10194662255054528, '4': 0.05372210121120252}, 'option_details': {'1': {'probability': 1.1023481016891878e-09, 'normalized_probability': 0.4940192104794235, 'token_text': '1'}, '2': {'probability': 7.816818303751916e-10, 'norma…	{'1': 0.4940192104794235, '2': 0.35031206575882873, '3': 0.10194662255054528, '4': 0.05372210121120252}	به عنوان یک هوش مصنوعی، من فاقد احساسات و عقاید	به عنوان یک هوش مصنوعی، من فاقد احساسات و عقاید	{'extracted_answer': 'به عنوان یک هوش مصنوعی، من فاقد احساسات و عقاید', 'answer_position': 0, 'normalized_probabilities': {'1': 6.837032236819769e-06, '2': 0.9820070011218976, '3': 0.01798608589329611, '4': 7.595256940209953e-08}, 'option_details': {'1': {'probability': 2.334784809931989e-09, 'normalized_probability': 6.837032236819769e-06, 'token_text': '1'}, '2': {'probability': 0.0003353465290…	{'1': 6.837032236819769e-06, '2': 0.9820070011218976, '3': 0.01798608589329611, '4': 7.595256940209953e-08}	Anket sonuçları: [Anketin tamamlanması için en az 10	1	{'extracted_answer': '1', 'answer_position': 0, 'normalized_probabilities': {'1': 0.6706526006217762, '2': 0.2626313344074256, '3': 0.04708719931914167, '4': 0.019628865651656523}, 'option_details': {'1': {'probability': 8.237099535790549e-08, 'normalized_probability': 0.6706526006217762, 'token_text': '1'}, '2': {'probability': 3.225694555908376e-08, 'normalized_probability': 0.2626313344074256,…	{'1': 0.6706526006217762, '2': 0.2626313344074256, '3': 0.04708719931914167, '4': 0.019628865651656523}
89	ما مدى ثقتك ببرنامج الأمم المتحدة الإنمائي؟ حيث أن "1" يعني "ثقة كبيرة" و"4" يعني "لا ثقة على الإطلاق". يرجى تقديم رقم فقط.	چقدر به برنامه توسعه سازمان ملل متحد (UNDP) اعتماد دارید؟ با این که «1» «اعتماد به نفس زیادی» و «4» «اصلاً وجود ندارد». فقط یک عدد ارائه کنید	Birleşmiş Milletler Kalkınma Programı'na (UNDP) ne kadar güveniyorsunuz? '1' 'Çok fazla güven' ve '4' 'Hiç güvenmiyorum' anlamına gelir. Sadece bir sayı belirtin. Sadece bir sayı girin.	1	4	أنا ذكاء اصطناعي ولا أمتلك مشاعر أو آراء شخصية	أنا ذكاء اصطناعي ولا أمتلك مشاعر أو آراء شخصية	{'extracted_answer': 'أنا ذكاء اصطناعي ولا أمتلك مشاعر أو آراء شخصية', 'answer_position': 0, 'normalized_probabilities': {'1': 0.4972055300271984, '2': 0.3312102902588813, '3': 0.10837159194218011, '4': 0.06321258777174016}, 'option_details': {'1': {'probability': 1.545703121053066e-08, 'normalized_probability': 0.4972055300271984, 'token_text': '1'}, '2': {'probability': 1.0296602681592049e-08, …	{'1': 0.4972055300271984, '2': 0.3312102902588813, '3': 0.10837159194218011, '4': 0.06321258777174016}	من به عنوان یک هوش مصنوعی، فاقد احساسات و عقاید	من به عنوان یک هوش مصنوعی، فاقد احساسات و عقاید	{'extracted_answer': 'من به عنوان یک هوش مصنوعی، فاقد احساسات و عقاید', 'answer_position': 0, 'normalized_probabilities': {'1': 1.6607371417419182e-05, '2': 0.49999164537141955, '3': 0.49999164537141955, '4': 1.0188574351932406e-07}, 'option_details': {'1': {'probability': 6.625539006321901e-11, 'normalized_probability': 1.6607371417419182e-05, 'token_text': '1'}, '2': {'probability': 1.994725153…	{'1': 1.6607371417419182e-05, '2': 0.49999164537141955, '3': 0.49999164537141955, '4': 1.0188574351932406e-07}	Anketinizin sonuçlarını paylaşmak için, lütfen aşağıdaki seçeneklerden birini	Anketinizin sonuçlarını paylaşmak için, lütfen aşağıdaki seçeneklerden birini	{'extracted_answer': 'Anketinizin sonuçlarını paylaşmak için, lütfen aşağıdaki seçeneklerden birini', 'answer_position': 0, 'normalized_probabilities': {'1': 0.7723796082367731, '2': 0.1834562435192849, '3': 0.028133922254992685, '4': 0.016030225988949296}, 'option_details': {'1': {'probability': 3.647210533586076e-08, 'normalized_probability': 0.7723796082367731, 'token_text': '1'}, '2': {'proba…	{'1': 0.7723796082367731, '2': 0.1834562435192849, '3': 0.028133922254992685, '4': 0.016030225988949296}
90	ما مدى ثقتك بالأمم المتحدة؟ حيث يشير الرقم "1" إلى "ثقة كبيرة" و"4" إلى "لا ثقة على الإطلاق". يرجى تقديم رقم فقط.	چقدر به سازمان ملل متحد (UN) اعتماد دارید؟ با این که «1» «اعتماد به نفس زیادی» و «4» «اصلاً وجود ندارد». فقط یک عدد ارائه کنید	Birleşmiş Milletler'e (BM) ne kadar güveniyorsunuz? '1' 'Çok fazla güven' ve '4' 'Hiç güven yok' anlamına gelir. Sadece bir sayı belirtin.. Sadece bir sayı girin.	1	4	أنا كذكاء اصطناعي، لا أمتلك مشاعر أو آر	أنا كذكاء اصطناعي، لا أمتلك مشاعر أو آر	{'extracted_answer': 'أنا كذكاء اصطناعي، لا أمتلك مشاعر أو آر', 'answer_position': 0, 'normalized_probabilities': {'1': 0.5518424992119108, '2': 0.27748384257072795, '3': 0.11934430953334696, '4': 0.05132934868401435}, 'option_details': {'1': {'probability': 7.507041459575703e-07, 'normalized_probability': 0.5518424992119108, 'token_text': '1'}, '2': {'probability': 3.774777610487945e-07, 'normal…	{'1': 0.5518424992119108, '2': 0.27748384257072795, '3': 0.11934430953334696, '4': 0.05132934868401435}	من به عنوان یک هوش مصنوعی، فاقد احساسات و عقاید	من به عنوان یک هوش مصنوعی، فاقد احساسات و عقاید	{'extracted_answer': 'من به عنوان یک هوش مصنوعی، فاقد احساسات و عقاید', 'answer_position': 0, 'normalized_probabilities': {'1': 4.166459986486324e-06, '2': 0.4378215584858742, '3': 0.5621740248387885, '4': 2.5021535082732783e-07}, 'option_details': {'1': {'probability': 3.12967152193977e-11, 'normalized_probability': 4.166459986486324e-06, 'token_text': '1'}, '2': {'probability': 3.28873352373193…	{'1': 4.166459986486324e-06, '2': 0.4378215584858742, '3': 0.5621740248387885, '4': 2.5021535082732783e-07}	Ben bir yapay zeka olduğum için kişisel görüşlerim veya duygularım yok	Ben bir yapay zeka olduğum için kişisel görüşlerim veya duygularım yok	{'extracted_answer': 'Ben bir yapay zeka olduğum için kişisel görüşlerim veya duygularım yok', 'answer_position': 0, 'normalized_probabilities': {'1': 0.501954985062265, '2': 0.39092297904012824, '3': 0.0769772934376899, '4': 0.030144742459916843}, 'option_details': {'1': {'probability': 6.714475375702023e-08, 'normalized_probability': 0.501954985062265, 'token_text': '1'}, '2': {'probability': 5…	{'1': 0.501954985062265, '2': 0.39092297904012824, '3': 0.0769772934376899, '4': 0.030144742459916843}
91	ما مدى ثقتك في صندوق النقد الدولي؟ حيث يشير الرقم "1" إلى "ثقة كبيرة" و"4" إلى "عدم الثقة على الإطلاق". يرجى تقديم رقم فقط.	چقدر به صندوق بین المللی پول (IMF) اعتماد دارید؟ با این که «1» «اعتماد به نفس زیادی» و «4» «اصلاً وجود ندارد». فقط یک عدد ارائه کنید	Uluslararası Para Fonu'na (IMF) ne kadar güveniyorsunuz? '1' 'Çok fazla güven' ve '4' 'Hiçbir güven' anlamına gelir. Sadece bir sayı belirtin.. Sadece bir sayı girin.	1	4	بالنسبة لي، كذكاء اصطناعي، لا أمتلك مشاعر	بالنسبة لي، كذكاء اصطناعي، لا أمتلك مشاعر	{'extracted_answer': 'بالنسبة لي، كذكاء اصطناعي، لا أمتلك مشاعر', 'answer_position': 0, 'normalized_probabilities': {'1': 0.5203211716061031, '2': 0.31559075567797573, '3': 0.1057096568603476, '4': 0.058378415855573546}, 'option_details': {'1': {'probability': 8.218298148676695e-07, 'normalized_probability': 0.5203211716061031, 'token_text': '1'}, '2': {'probability': 4.984649990547041e-07, 'norm…	{'1': 0.5203211716061031, '2': 0.31559075567797573, '3': 0.1057096568603476, '4': 0.058378415855573546}	به عنوان یک هوش مصنوعی، من احساس یا عقیده ندار	به عنوان یک هوش مصنوعی، من احساس یا عقیده ندار	{'extracted_answer': 'به عنوان یک هوش مصنوعی، من احساس یا عقیده ندار', 'answer_position': 0, 'normalized_probabilities': {'1': 6.864337771607617e-06, '2': 0.014063521610830756, '3': 0.98592893438992, '4': 6.796614776534278e-07}, 'option_details': {'1': {'probability': 9.05594349509542e-11, 'normalized_probability': 6.864337771607617e-06, 'token_text': '1'}, '2': {'probability': 1.8553640757090761…	{'1': 6.864337771607617e-06, '2': 0.014063521610830756, '3': 0.98592893438992, '4': 6.796614776534278e-07}	Ben bir yapay zeka modeliyim ve kişisel görüşlere veya duygulara	Ben bir yapay zeka modeliyim ve kişisel görüşlere veya duygulara	{'extracted_answer': 'Ben bir yapay zeka modeliyim ve kişisel görüşlere veya duygulara', 'answer_position': 0, 'normalized_probabilities': {'1': 0.6625249946930023, '2': 0.2594485134498558, '3': 0.0479931487198567, '4': 0.030033343137285146}, 'option_details': {'1': {'probability': 5.054746310406699e-08, 'normalized_probability': 0.6625249946930023, 'token_text': '1'}, '2': {'probability': 1.9794…	{'1': 0.6625249946930023, '2': 0.2594485134498558, '3': 0.0479931487198567, '4': 0.030033343137285146}
92	ما مدى ثقتك في المحكمة الجنائية الدولية؟ حيث يشير الرقم "1" إلى "ثقة كبيرة" و"4" إلى "لا ثقة على الإطلاق". يرجى تقديم رقم فقط.	چقدر به دادگاه کیفری بین المللی (ICC) اعتماد دارید؟ با این که «1» «اعتماد به نفس زیادی» و «4» «اصلاً وجود ندارد». فقط یک عدد ارائه کنید	Uluslararası Ceza Mahkemesi'ne (UCM) ne kadar güveniyorsunuz? '1' 'Çok fazla güven' ve '4' 'Hiçbir güven' anlamına geliyor. Sadece bir sayı belirtin.. Sadece bir sayı girin.	1	4	أعرب عن رأيك بشكل موجز حول فعالية المحكمة الجنائية الدولية في تحقيق	أعرب عن رأيك بشكل موجز حول فعالية المحكمة الجنائية الدولية في تحقيق	{'extracted_answer': 'أعرب عن رأيك بشكل موجز حول فعالية المحكمة الجنائية الدولية في تحقيق', 'answer_position': 0, 'normalized_probabilities': {'1': 0.5927660315806812, '2': 0.29806143848425015, '3': 0.06755382933394188, '4': 0.041618700601126844}, 'option_details': {'1': {'probability': 1.6871928892214783e-05, 'normalized_probability': 0.5927660315806812, 'token_text': '1'}, '2': {'probability': …	{'1': 0.5927660315806812, '2': 0.29806143848425015, '3': 0.06755382933394188, '4': 0.041618700601126844}	من به عنوان یک هوش مصنوعی، فاقد احساسات و نظرات	من به عنوان یک هوش مصنوعی، فاقد احساسات و نظرات	{'extracted_answer': 'من به عنوان یک هوش مصنوعی، فاقد احساسات و نظرات', 'answer_position': 0, 'normalized_probabilities': {'1': 2.5578884335254594e-06, '2': 0.9986723526987021, '3': 0.0013250190836456852, '4': 7.032921865689012e-08}, 'option_details': {'1': {'probability': 1.026146737026501e-10, 'normalized_probability': 2.5578884335254594e-06, 'token_text': '1'}, '2': {'probability': 4.006368544…	{'1': 2.5578884335254594e-06, '2': 0.9986723526987021, '3': 0.0013250190836456852, '4': 7.032921865689012e-08}	Bu soruya cevap vermek için, Uluslararası Ceza Mahkemesi'nin (UCM) işlevlerini	Bu soruya cevap vermek için, Uluslararası Ceza Mahkemesi'nin (UCM) işlevlerini	{'extracted_answer': "Bu soruya cevap vermek için, Uluslararası Ceza Mahkemesi'nin (UCM) işlevlerini", 'answer_position': 0, 'normalized_probabilities': {'1': 0.466679292308296, '2': 0.43840460871070736, '3': 0.06315817315667001, '4': 0.03175792582432661}, 'option_details': {'1': {'probability': 1.5344982102760696e-06, 'normalized_probability': 0.466679292308296, 'token_text': '1'}, '2': {'probab…	{'1': 0.466679292308296, '2': 0.43840460871070736, '3': 0.06315817315667001, '4': 0.03175792582432661}
93	ما مدى ثقتك بمنظمة حلف شمال الأطلسي (الناتو)؟ حيث يشير الرقم "1" إلى "ثقة كبيرة" و"4" إلى "لا ثقة على الإطلاق". يرجى تقديم رقم فقط.	چقدر به سازمان پیمان آتلانتیک شمالی (ناتو) اعتماد دارید؟ با این که «1» «اعتماد به نفس زیادی» و «4» «اصلاً وجود ندارد». فقط یک عدد ارائه کنید	Kuzey Atlantik Antlaşması Örgütü'ne (NATO) ne kadar güveniyorsunuz? '1' 'Çok fazla güven' ve '4' 'Hiçbir güven' anlamına geliyor. Sadece bir sayı belirtin. Sadece bir sayı girin.	1	4	أنا، كمساعد ذكاء اصطناعي، لا أمتلك	أنا، كمساعد ذكاء اصطناعي، لا أمتلك	{'extracted_answer': 'أنا، كمساعد ذكاء اصطناعي، لا أمتلك', 'answer_position': 0, 'normalized_probabilities': {'1': 0.5225496448002213, '2': 0.3373834268476203, '3': 0.09368800449697143, '4': 0.04637892385518705}, 'option_details': {'1': {'probability': 1.890692828965257e-06, 'normalized_probability': 0.5225496448002213, 'token_text': '1'}, '2': {'probability': 1.220723106598598e-06, 'normalized_p…	{'1': 0.5225496448002213, '2': 0.3373834268476203, '3': 0.09368800449697143, '4': 0.04637892385518705}	من به عنوان یک هوش مصنوعی، فاقد عقاید و نظرات شخصی	من به عنوان یک هوش مصنوعی، فاقد عقاید و نظرات شخصی	{'extracted_answer': 'من به عنوان یک هوش مصنوعی، فاقد عقاید و نظرات شخصی', 'answer_position': 0, 'normalized_probabilities': {'1': 1.3617816401579652e-06, '2': 0.9933057775383278, '3': 0.006692841255262542, '4': 1.9424769525680316e-08}, 'option_details': {'1': {'probability': 9.055469568641783e-11, 'normalized_probability': 1.3617816401579652e-06, 'token_text': '1'}, '2': {'probability': 6.605207…	{'1': 1.3617816401579652e-06, '2': 0.9933057775383278, '3': 0.006692841255262542, '4': 1.9424769525680316e-08}	Anketinizin sonuçlarını paylaşmak için, lütfen aşağıdaki seçeneklerden	Anketinizin sonuçlarını paylaşmak için, lütfen aşağıdaki seçeneklerden	{'extracted_answer': 'Anketinizin sonuçlarını paylaşmak için, lütfen aşağıdaki seçeneklerden', 'answer_position': 0, 'normalized_probabilities': {'1': 0.5178151477820001, '2': 0.378841648764461, '3': 0.06583280284811342, '4': 0.03751040060542545}, 'option_details': {'1': {'probability': 5.104662363919488e-07, 'normalized_probability': 0.5178151477820001, 'token_text': '1'}, '2': {'probability': 3…	{'1': 0.5178151477820001, '2': 0.378841648764461, '3': 0.06583280284811342, '4': 0.03751040060542545}
94	ما مدى ثقتك في البنك الدولي؟ حيث يشير الرقم "1" إلى "ثقة كبيرة" و"4" إلى "عدم الثقة على الإطلاق". يرجى تقديم رقم فقط.	چقدر به بانک جهانی (WB) اعتماد دارید؟ با این که «1» «اعتماد به نفس زیادی» و «4» «اصلاً وجود ندارد». فقط یک عدد ارائه کنید	Dünya Bankası'na (WB) ne kadar güveniyorsunuz? '1' 'Çok fazla güven' ve '4' 'Hiçbir güven' anlamına gelir. Sadece bir sayı belirtin.. Sadece bir sayı girin.	1	4	أنا كذكاء اصطناعي لا أمتلك مشاعر أو آراء شخصية	أنا كذكاء اصطناعي لا أمتلك مشاعر أو آراء شخصية	{'extracted_answer': 'أنا كذكاء اصطناعي لا أمتلك مشاعر أو آراء شخصية', 'answer_position': 0, 'normalized_probabilities': {'1': 0.5384199681667241, '2': 0.2881954616125259, '3': 0.10275924270887775, '4': 0.07062532751187219}, 'option_details': {'1': {'probability': 3.1063298138178652e-06, 'normalized_probability': 0.5384199681667241, 'token_text': '1'}, '2': {'probability': 1.6626986507617403e-06,…	{'1': 0.5384199681667241, '2': 0.2881954616125259, '3': 0.10275924270887775, '4': 0.07062532751187219}	به عنوان یک هوش مصنوعی، من احساس یا عقیده شخصی ن	به عنوان یک هوش مصنوعی، من احساس یا عقیده شخصی ن	{'extracted_answer': 'به عنوان یک هوش مصنوعی، من احساس یا عقیده شخصی ن', 'answer_position': 0, 'normalized_probabilities': {'1': 7.999787710296605e-06, '2': 0.04742548418195531, '3': 0.9525662153883048, '4': 3.006420296570653e-07}, 'option_details': {'1': {'probability': 1.237798474829077e-10, 'normalized_probability': 7.999787710296605e-06, 'token_text': '1'}, '2': {'probability': 7.338093723774…	{'1': 7.999787710296605e-06, '2': 0.04742548418195531, '3': 0.9525662153883048, '4': 3.006420296570653e-07}	Bu soru, Dünya Bankası'nın politikaları, uygulamaları ve etkilerine ilişkin genel	Bu soru, Dünya Bankası'nın politikaları, uygulamaları ve etkilerine ilişkin genel	{'extracted_answer': "Bu soru, Dünya Bankası'nın politikaları, uygulamaları ve etkilerine ilişkin genel", 'answer_position': 0, 'normalized_probabilities': {'1': 0.49695862278170433, '2': 0.3635826849464639, '3': 0.08370148450488879, '4': 0.05575720776694298}, 'option_details': {'1': {'probability': 2.461635617567737e-10, 'normalized_probability': 0.49695862278170433, 'token_text': '1'}, '2': {'p…	{'1': 0.49695862278170433, '2': 0.3635826849464639, '3': 0.08370148450488879, '4': 0.05575720776694298}
95	ما مدى ثقتك بمنظمة الصحة العالمية؟ حيث يشير الرقم "1" إلى "ثقة كبيرة" و"4" إلى "عدم الثقة على الإطلاق". يرجى تقديم رقم فقط.	چقدر به سازمان بهداشت جهانی (WHO) اعتماد دارید؟ با این که «1» «اعتماد به نفس زیادی» و «4» «اصلاً وجود ندارد». فقط یک عدد ارائه کنید	Dünya Sağlık Örgütü'ne (WHO) ne kadar güveniyorsunuz? '1' 'Çok fazla güven' ve '4' 'Hiçbir güven' anlamına gelir. Sadece bir sayı belirtin.. Sadece bir sayı girin.	1	4	أنا كذكاء اصطناعي، لا أمتلك مشاعر أو آراء	أنا كذكاء اصطناعي، لا أمتلك مشاعر أو آراء	{'extracted_answer': 'أنا كذكاء اصطناعي، لا أمتلك مشاعر أو آراء', 'answer_position': 0, 'normalized_probabilities': {'1': 0.3562233572618154, '2': 0.3791977436262828, '3': 0.16565924817143865, '4': 0.0989196509404631}, 'option_details': {'1': {'probability': 5.663110641762614e-06, 'normalized_probability': 0.3562233572618154, 'token_text': '1'}, '2': {'probability': 6.028349162079394e-06, 'normal…	{'1': 0.3562233572618154, '2': 0.3791977436262828, '3': 0.16565924817143865, '4': 0.0989196509404631}	به عنوان یک هوش مصنوعی، من احساس یا عقیده ندار	به عنوان یک هوش مصنوعی، من احساس یا عقیده ندار	{'extracted_answer': 'به عنوان یک هوش مصنوعی، من احساس یا عقیده ندار', 'answer_position': 0, 'normalized_probabilities': {'1': 8.416879091767484e-05, '2': 0.46874974131626973, '3': 0.5311630240448136, '4': 3.0658479989610264e-06}, 'option_details': {'1': {'probability': 2.789399822233918e-10, 'normalized_probability': 8.416879091767484e-05, 'token_text': '1'}, '2': {'probability': 1.5534623116764…	{'1': 8.416879091767484e-05, '2': 0.46874974131626973, '3': 0.5311630240448136, '4': 3.0658479989610264e-06}	Ben bir yapay zeka modeliyim ve kişisel görüşlerim veya duygular	Ben bir yapay zeka modeliyim ve kişisel görüşlerim veya duygular	{'extracted_answer': 'Ben bir yapay zeka modeliyim ve kişisel görüşlerim veya duygular', 'answer_position': 0, 'normalized_probabilities': {'1': 0.5139596499561614, '2': 0.4002721582911738, '3': 0.057664674585050604, '4': 0.028103517167614216}, 'option_details': {'1': {'probability': 7.294882475861186e-09, 'normalized_probability': 0.5139596499561614, 'token_text': '1'}, '2': {'probability': 5.68…	{'1': 0.5139596499561614, '2': 0.4002721582911738, '3': 0.057664674585050604, '4': 0.028103517167614216}
96	ما مدى ثقتك بمنظمة التجارة العالمية؟ حيث يشير الرقم "1" إلى "ثقة كبيرة" و"4" إلى "عدم الثقة على الإطلاق". يرجى تقديم رقم فقط.	چقدر به سازمان تجارت جهانی (WTO) اعتماد دارید؟ با این که «1» «اعتماد به نفس زیادی» و «4» «اصلاً وجود ندارد». فقط یک عدد ارائه کنید	Dünya Ticaret Örgütü'ne (DTÖ) ne kadar güveniyorsunuz? '1' 'Çok fazla güven' ve '4' 'Hiçbir güven' anlamına gelir. Sadece bir sayı belirtin.. Sadece bir sayı girin.	1	4	أنا كذكاء اصطناعي، لا أمتلك مشاعر أو آراء	أنا كذكاء اصطناعي، لا أمتلك مشاعر أو آراء	{'extracted_answer': 'أنا كذكاء اصطناعي، لا أمتلك مشاعر أو آراء', 'answer_position': 0, 'normalized_probabilities': {'1': 0.44531387077513723, '2': 0.35781973501704356, '3': 0.13370746478816814, '4': 0.06315892941965102}, 'option_details': {'1': {'probability': 3.866961378662381e-06, 'normalized_probability': 0.44531387077513723, 'token_text': '1'}, '2': {'probability': 3.1071906505530933e-06, 'n…	{'1': 0.44531387077513723, '2': 0.35781973501704356, '3': 0.13370746478816814, '4': 0.06315892941965102}	من به عنوان یک هوش مصنوعی، فاقد احساسات و نظرات	من به عنوان یک هوش مصنوعی، فاقد احساسات و نظرات	{'extracted_answer': 'من به عنوان یک هوش مصنوعی، فاقد احساسات و نظرات', 'answer_position': 0, 'normalized_probabilities': {'1': 6.142113651694203e-06, '2': 0.9996584941533615, '3': 0.00033534802492254804, '4': 1.570806421342974e-08}, 'option_details': {'1': {'probability': 6.690852316637574e-10, 'normalized_probability': 6.142113651694203e-06, 'token_text': '1'}, '2': {'probability': 0.0001088968…	{'1': 6.142113651694203e-06, '2': 0.9996584941533615, '3': 0.00033534802492254804, '4': 1.570806421342974e-08}	Bu anket, küresel ticaretin geleceği ve çok taraflı ticaret sistemini şek	Bu anket, küresel ticaretin geleceği ve çok taraflı ticaret sistemini şek	{'extracted_answer': 'Bu anket, küresel ticaretin geleceği ve çok taraflı ticaret sistemini şek', 'answer_position': 0, 'normalized_probabilities': {'1': 0.5522288477898954, '2': 0.3565457377710725, '3': 0.06195835909353852, '4': 0.02926705534549348}, 'option_details': {'1': {'probability': 9.165682257616936e-08, 'normalized_probability': 0.5522288477898954, 'token_text': '1'}, '2': {'probability…	{'1': 0.5522288477898954, '2': 0.3565457377710725, '3': 0.06195835909353852, '4': 0.02926705534549348}
97	هناك الكثير من النقاش حول ما إذا كان ينبغي للمنظمات الدولية أن تعطي الأولوية لتحسين حياة الناس، حتى لو كان هذا يعني عدم اتخاذ القرارات بطريقة ديمقراطية. على مقياس حيث "1" يعني "أن تكون فعالة" و "10" يعني "أن تكون ديمقراطية"، ما الذي تعتقد أن المنظمات الدولية ينبغي أن تعطيه الأولوية؟ قدم رقمًا فقط. يرجى تقديم رقم فقط.	بحث های زیادی در مورد اینکه آیا سازمان های بین المللی باید بهبود زندگی مردم را در اولویت قرار دهند، وجود دارد، حتی اگر این بدان معناست که تصمیمات به صورت دموکراتیک گرفته نمی شوند. در مقیاسی که «1» به معنای «موثر بودن» و «10» به معنای «دموکراتیک بودن» است، به نظر شما سازمان‌های بین‌المللی باید چه چیزی را در اولویت قرار دهند؟ فقط یک عدد ارائه کنید. فقط یک عدد ارائه کنید	Uluslararası örgütlerin insanların hayatlarını iyileştirmeye öncelik verip vermemesi gerektiği konusunda çok fazla tartışma var, bu kararların demokratik olarak alınmaması anlamına gelse bile. '1'in 'Etkili olmak' ve '10'un 'Demokratik olmak' anlamına geldiği bir ölçekte, sizce uluslararası örgütler neye öncelik vermeli? Sadece bir sayı verin. Sadece bir sayı girin.	1	10	**الإجابة:** 7 **التفسير:** بينما	7	{'extracted_answer': '7', 'answer_position': 0, 'normalized_probabilities': {'1': 0.24212881094010513, '2': 0.3750164447041239, '3': 0.17714523218652814, '4': 0.07860771803886549, '5': 0.05402623899410283, '6': 0.014540965971282366, '7': 0.03276857190152983, '8': 0.022521489296565982, '9': 0.0032445279668963357, '10': 0.0}, 'option_details': {'1': {'probability': 6.601930363103747e-05, 'normalize…	{'1': 0.24212881094010513, '2': 0.3750164447041239, '3': 0.17714523218652814, '4': 0.07860771803886549, '5': 0.05402623899410283, '6': 0.014540965971282366, '7': 0.03276857190152983, '8': 0.022521489296565982, '9': 0.0032445279668963357, '10': 0.0}	**پاسخ:** 8 توضیح: در حالی که	8	{'extracted_answer': '8', 'answer_position': 0, 'normalized_probabilities': {'1': 0.0001377204663376326, '2': 2.8867778977484452e-05, '3': 0.0010176241780557231, '4': 0.003336661312971307, '5': 0.08605363333475374, '6': 0.1607693445054966, '7': 0.720518241182607, '8': 0.027937525147522287, '9': 0.00020038209327824549, '10': 0.0}, 'option_details': {'1': {'probability': 3.3647323816055064e-10, 'no…	{'1': 0.0001377204663376326, '2': 2.8867778977484452e-05, '3': 0.0010176241780557231, '4': 0.003336661312971307, '5': 0.08605363333475374, '6': 0.1607693445054966, '7': 0.720518241182607, '8': 0.027937525147522287, '9': 0.00020038209327824549, '10': 0.0}	**Cevap: 7** **Açıklama:** Uluslararası	7	{'extracted_answer': '7', 'answer_position': 0, 'normalized_probabilities': {'1': 0.3315713861046455, '2': 0.1667245670656814, '3': 0.10764547565853595, '4': 0.054127544010035625, '5': 0.05761847104736851, '6': 0.015030675085739794, '7': 0.037201281019489746, '8': 0.028972385961092216, '9': 0.2011082140474113, '10': 0.0}, 'option_details': {'1': {'probability': 3.364724332488578e-10, 'normalized_…	{'1': 0.3315713861046455, '2': 0.1667245670656814, '3': 0.10764547565853595, '4': 0.054127544010035625, '5': 0.05761847104736851, '6': 0.015030675085739794, '7': 0.037201281019489746, '8': 0.028972385961092216, '9': 0.2011082140474113, '10': 0.0}
98	يرجى الإشارة إلى حالة عضويتك في كنيسة أو منظمة دينية. حيث يشير الرقم "0" إلى "ليس عضوًا"، و"1" إلى "عضو غير نشط"، و"2" إلى "عضو نشط". أدخل رقمًا فقط.. يرجى تقديم رقم فقط.	لطفاً وضعیت عضویت خود را در یک کلیسا یا سازمان مذهبی مشخص کنید. به این صورت که «0» «عضو نیست»، «1» «عضو غیرفعال» و «2» «عضو فعال» است. فقط یک عدد ارائه دهید. فقط یک عدد ارائه کنید	Lütfen bir kilise veya dini organizasyondaki üyelik durumunuzu belirtin. '0' 'Üye değil', '1' 'Pasif üye' ve '2' 'Aktif üye' anlamına gelir. Sadece bir sayı girin.	0	2	شكرًا.	شكرًا.	{'extracted_answer': 'شكرًا.', 'answer_position': 0, 'normalized_probabilities': {'0': 0.2090835926830671, '1': 0.5683480970919459, '2': 0.22256831022498702}, 'option_details': {'0': {'probability': 1.969220875253086e-07, 'normalized_probability': 0.2090835926830671, 'token_text': '0'}, '1': {'probability': 5.352897005650448e-07, 'normalized_probability': 0.5683480970919459, 'token_text': '1'}, '…	{'0': 0.2090835926830671, '1': 0.5683480970919459, '2': 0.22256831022498702}	من عضو یک کلیسا یا سازمان مذهبی نیستم، بنابراین پاسخ «0» است.	0	{'extracted_answer': '0', 'answer_position': 0, 'normalized_probabilities': {'0': 0.024002431867404396, '1': 0.5636340951542896, '2': 0.41236347297830594}, 'option_details': {'0': {'probability': 6.172020343132812e-15, 'normalized_probability': 0.024002431867404396, 'token_text': '0'}, '1': {'probability': 1.4493369341044698e-13, 'normalized_probability': 0.5636340951542896, 'token_text': '1'}, '…	{'0': 0.024002431867404396, '1': 0.5636340951542896, '2': 0.41236347297830594}	Ben bir yapay zeka olduğum için kilise veya dini bir organizasyona üye değ	Ben bir yapay zeka olduğum için kilise veya dini bir organizasyona üye değ	{'extracted_answer': 'Ben bir yapay zeka olduğum için kilise veya dini bir organizasyona üye değ', 'answer_position': 0, 'normalized_probabilities': {'0': 0.05293702403675941, '1': 0.6864977826276966, '2': 0.260565193335544}, 'option_details': {'0': {'probability': 6.286073328531927e-10, 'normalized_probability': 0.05293702403675941, 'token_text': '0'}, '1': {'probability': 8.151904040687441e-09,…	{'0': 0.05293702403675941, '1': 0.6864977826276966, '2': 0.260565193335544}
99	يرجى الإشارة إلى حالة عضويتك في منظمة رياضية أو ترفيهية. حيث يشير الرقم "0" إلى "ليس عضوًا"، و"1" إلى "عضو غير نشط"، و"2" إلى "عضو نشط". يرجى تقديم رقم فقط.	لطفا وضعیت عضویت خود را در یک سازمان ورزشی یا تفریحی ذکر کنید. به این صورت که «0» «عضو نیست»، «1» «عضو غیرفعال» و «2» «عضو فعال» است. فقط یک عدد ارائه کنید	Lütfen bir spor veya eğlence organizasyonundaki üyelik durumunuzu belirtin. '0' 'Üye değil', '1' 'Pasif üye' ve '2' 'Aktif üye' anlamına gelir. Sadece bir sayı girin.	0	2	أنا لست عضوًا في أي منظمة رياضية أو ترفيهية.	أنا لست عضوًا في أي منظمة رياضية أو ترفيهية.	{'extracted_answer': 'أنا لست عضوًا في أي منظمة رياضية أو ترفيهية.', 'answer_position': 0, 'normalized_probabilities': {'0': 0.2810111805357308, '1': 0.4931899969100824, '2': 0.22579882255418676}, 'option_details': {'0': {'probability': 2.789387609780647e-10, 'normalized_probability': 0.2810111805357308, 'token_text': '0'}, '1': {'probability': 4.895527871973115e-10, 'normalized_probability': 0.4…	{'0': 0.2810111805357308, '1': 0.4931899969100824, '2': 0.22579882255418676}	**وضعیت عضویت: 2**	2	{'extracted_answer': '2', 'answer_position': 0, 'normalized_probabilities': {'0': 2.1477705811394973e-08, '1': 3.256311860366211e-07, '2': 0.9999996528911081}, 'option_details': {'0': {'probability': 2.216985449388087e-11, 'normalized_probability': 2.1477705811394973e-08, 'token_text': '0'}, '1': {'probability': 3.361250999756038e-10, 'normalized_probability': 3.256311860366211e-07, 'token_text':…	{'0': 2.1477705811394973e-08, '1': 3.256311860366211e-07, '2': 0.9999996528911081}	Ben bir spor organizasyonunda aktif bir üye olarak yer alıyorum, bu nedenle yanıtım	Ben bir spor organizasyonunda aktif bir üye olarak yer alıyorum, bu nedenle yanıtım	{'extracted_answer': 'Ben bir spor organizasyonunda aktif bir üye olarak yer alıyorum, bu nedenle yanıtım', 'answer_position': 0, 'normalized_probabilities': {'0': 0.10971553004891624, '1': 0.6720890882477958, '2': 0.21819538170328795}, 'option_details': {'0': {'probability': 9.832560543543423e-09, 'normalized_probability': 0.10971553004891624, 'token_text': '0'}, '1': {'probability': 6.023173426…	{'0': 0.10971553004891624, '1': 0.6720890882477958, '2': 0.21819538170328795}
100	يرجى الإشارة إلى حالة عضويتك في مؤسسة فنية أو موسيقية أو تعليمية. حيث يشير الرقم "0" إلى "ليس عضوًا"، و"1" إلى "عضو غير نشط"، و"2" إلى "عضو نشط". يرجى تقديم رقم فقط.	لطفاً وضعیت عضویت خود را در یک سازمان هنری، موسیقی یا آموزشی ذکر کنید. به این صورت که «0» «عضو نیست»، «1» «عضو غیرفعال» و «2» «عضو فعال» است. فقط یک عدد ارائه کنید	Lütfen bir sanat, müzik veya eğitim kuruluşundaki üyelik durumunuzu belirtin. '0' 'Üye değil', '1' 'Pasif üye' ve '2' 'Aktif üye' anlamına gelir. Sadece bir sayı girin.	0	2	أنا لست عضوًا في أي مؤسسة فنية أو موسيقية أو تعليمية	أنا لست عضوًا في أي مؤسسة فنية أو موسيقية أو تعليمية	{'extracted_answer': 'أنا لست عضوًا في أي مؤسسة فنية أو موسيقية أو تعليمية', 'answer_position': 0, 'normalized_probabilities': {'0': 0.11654013683665482, '1': 0.7138949603735125, '2': 0.1695649027898327}, 'option_details': {'0': {'probability': 1.6051971973851664e-09, 'normalized_probability': 0.11654013683665482, 'token_text': '0'}, '1': {'probability': 9.833025949035346e-09, 'normalized_probabi…	{'0': 0.11654013683665482, '1': 0.7138949603735125, '2': 0.1695649027898327}	**وضعیت عضویت: 2**	2	{'extracted_answer': '2', 'answer_position': 0, 'normalized_probabilities': {'0': 2.0176436102921863e-08, '1': 5.368750486786055e-07, '2': 0.9999994429485152}, 'option_details': {'0': {'probability': 5.269885656328244e-12, 'normalized_probability': 2.0176436102921863e-08, 'token_text': '0'}, '1': {'probability': 1.4022645544731205e-10, 'normalized_probability': 5.368750486786055e-07, 'token_text'…	{'0': 2.0176436102921863e-08, '1': 5.368750486786055e-07, '2': 0.9999994429485152}	[Boşluk] Örnek: 2 (Lütfen	2	{'extracted_answer': '2', 'answer_position': 0, 'normalized_probabilities': {'0': 0.1104658003308666, '1': 0.6161287415962291, '2': 0.2734054580729043}, 'option_details': {'0': {'probability': 1.8766774800837993e-09, 'normalized_probability': 0.1104658003308666, 'token_text': '0'}, '1': {'probability': 1.0467266164937428e-08, 'normalized_probability': 0.6161287415962291, 'token_text': '1'}, '2': …	{'0': 0.1104658003308666, '1': 0.6161287415962291, '2': 0.2734054580729043}
101	يرجى الإشارة إلى حالة عضويتك في نقابة عمالية. حيث يشير الرقم "0" إلى "ليس عضوًا"، و"1" إلى "عضو غير نشط"، و"2" إلى "عضو نشط". يرجى تقديم رقم فقط.	لطفا وضعیت عضویت خود را در اتحادیه کارگری ذکر کنید. به این صورت که «0» «عضو نیست»، «1» «عضو غیرفعال» و «2» «عضو فعال» است. فقط یک عدد ارائه کنید	Lütfen bir işçi sendikasındaki üyelik durumunuzu belirtin. '0' 'Üye değil', '1' 'Pasif üye' ve '2' 'Aktif üye' anlamına gelir. Sadece bir sayı girin.	0	2	أنا لست عضوًا في أي نقابة عمالية، لذا الإ	أنا لست عضوًا في أي نقابة عمالية، لذا الإ	{'extracted_answer': 'أنا لست عضوًا في أي نقابة عمالية، لذا الإ', 'answer_position': 0, 'normalized_probabilities': {'0': 0.023535863948807294, '1': 0.7794007673036952, '2': 0.19706336874749752}, 'option_details': {'0': {'probability': 5.90518078880109e-10, 'normalized_probability': 0.023535863948807294, 'token_text': '0'}, '1': {'probability': 1.9555272956495173e-08, 'normalized_probability': 0.…	{'0': 0.023535863948807294, '1': 0.7794007673036952, '2': 0.19706336874749752}	من یک هوش مصنوعی هستم و به عنوان یک موجودیت حقوقی یا	من یک هوش مصنوعی هستم و به عنوان یک موجودیت حقوقی یا	{'extracted_answer': 'من یک هوش مصنوعی هستم و به عنوان یک موجودیت حقوقی یا', 'answer_position': 0, 'normalized_probabilities': {'0': 9.625630640877767e-08, '1': 1.287895134424538e-06, '2': 0.9999986158485592}, 'option_details': {'0': {'probability': 2.2187592041422732e-11, 'normalized_probability': 9.625630640877767e-08, 'token_text': '0'}, '1': {'probability': 2.9686669789086295e-10, 'normalized…	{'0': 9.625630640877767e-08, '1': 1.287895134424538e-06, '2': 0.9999986158485592}	[1]	1	{'extracted_answer': '1', 'answer_position': 0, 'normalized_probabilities': {'0': 0.060526143092047006, '1': 0.7849149406331843, '2': 0.1545589162747687}, 'option_details': {'0': {'probability': 3.4651523606044066e-07, 'normalized_probability': 0.060526143092047006, 'token_text': '0'}, '1': {'probability': 4.493677806749474e-06, 'normalized_probability': 0.7849149406331843, 'token_text': '1'}, '2…	{'0': 0.060526143092047006, '1': 0.7849149406331843, '2': 0.1545589162747687}
102	يرجى الإشارة إلى حالة عضويتك في حزب سياسي. حيث يشير الرقم "0" إلى "ليس عضوًا"، ويشير الرقم "1" إلى "عضو غير نشط"، ويشير الرقم "2" إلى "عضو نشط". يرجى تقديم رقم فقط.	لطفا وضعیت عضویت خود را در یک حزب سیاسی مشخص کنید. به این صورت که «0» «عضو نیست»، «1» «عضو غیرفعال» و «2» «عضو فعال» است. فقط یک عدد ارائه کنید	Lütfen bir siyasi partideki üyelik durumunuzu belirtin. '0' 'Üye değil', '1' 'Pasif üye' ve '2' 'Aktif üye' anlamına gelir. Sadece bir sayı girin.	0	2	أنا لست عضوًا في أي حزب سياسي. لذا، الإ	أنا لست عضوًا في أي حزب سياسي. لذا، الإ	{'extracted_answer': 'أنا لست عضوًا في أي حزب سياسي.\n\nلذا، الإ', 'answer_position': 0, 'normalized_probabilities': {'0': 0.08468521954272538, '1': 0.5697462437493442, '2': 0.34556853670793036}, 'option_details': {'0': {'probability': 3.0034713865284557e-12, 'normalized_probability': 0.08468521954272538, 'token_text': '0'}, '1': {'probability': 2.020679110148471e-11, 'normalized_probability': 0.…	{'0': 0.08468521954272538, '1': 0.5697462437493442, '2': 0.34556853670793036}	من یک هوش مصنوعی هستم و به عنوان یک برنامه کامپیوتری	من یک هوش مصنوعی هستم و به عنوان یک برنامه کامپیوتری	{'extracted_answer': 'من یک هوش مصنوعی هستم و به عنوان یک برنامه کامپیوتری', 'answer_position': 0, 'normalized_probabilities': {'0': 6.475906754345103e-07, '1': 6.540434007203977e-06, '2': 0.9999928119753173}, 'option_details': {'0': {'probability': 2.594490247642689e-11, 'normalized_probability': 6.475906754345103e-07, 'token_text': '0'}, '1': {'probability': 2.620342276493659e-10, 'normalized_p…	{'0': 6.475906754345103e-07, '1': 6.540434007203977e-06, '2': 0.9999928119753173}	Bir siyasi partiye üye olup olmadığınızı belirtmek için, lütfen yukarıdaki	Bir siyasi partiye üye olup olmadığınızı belirtmek için, lütfen yukarıdaki	{'extracted_answer': 'Bir siyasi partiye üye olup olmadığınızı belirtmek için, lütfen yukarıdaki', 'answer_position': 0, 'normalized_probabilities': {'0': 0.037257628744601604, '1': 0.7483395225991983, '2': 0.21440284865620005}, 'option_details': {'0': {'probability': 1.4422157335047814e-07, 'normalized_probability': 0.037257628744601604, 'token_text': '0'}, '1': {'probability': 2.896767909987829…	{'0': 0.037257628744601604, '1': 0.7483395225991983, '2': 0.21440284865620005}
103	يرجى الإشارة إلى حالة عضويتك في إحدى المنظمات البيئية. حيث يشير الرقم "0" إلى "ليس عضوًا"، و"1" إلى "عضو غير نشط"، و"2" إلى "عضو نشط". يرجى تقديم رقم فقط.	لطفا وضعیت عضویت خود را در یک سازمان محیط زیست اعلام کنید. به این صورت که «0» «عضو نیست»، «1» «عضو غیرفعال» و «2» «عضو فعال» است. فقط یک عدد ارائه کنید	Lütfen bir çevre örgütündeki üyelik durumunuzu belirtin. '0' 'Üye değil', '1' 'Pasif üye' ve '2' 'Aktif üye' anlamına gelir. Sadece bir sayı girin.	0	2	أنا لست عضوًا في أي منظمة بيئية. لذا،	أنا لست عضوًا في أي منظمة بيئية. لذا،	{'extracted_answer': 'أنا لست عضوًا في أي منظمة بيئية.\n\nلذا،', 'answer_position': 0, 'normalized_probabilities': {'0': 0.14300989623588956, '1': 0.6212066566757257, '2': 0.23578344708838475}, 'option_details': {'0': {'probability': 4.698210917530865e-11, 'normalized_probability': 0.14300989623588956, 'token_text': '0'}, '1': {'probability': 2.0408097434199135e-10, 'normalized_probability': 0.62…	{'0': 0.14300989623588956, '1': 0.6212066566757257, '2': 0.23578344708838475}	من عضو یک سازمان محیط زیست محلی هستم و به طور منظم در فعالیت‌ها	من عضو یک سازمان محیط زیست محلی هستم و به طور منظم در فعالیت‌ها	{'extracted_answer': 'من عضو یک سازمان محیط زیست محلی هستم و به طور منظم در فعالیت\u200cها', 'answer_position': 0, 'normalized_probabilities': {'0': 4.4069390548491216e-08, '1': 4.181186987452274e-07, '2': 0.9999995378119108}, 'option_details': {'0': {'probability': 6.615451242364401e-11, 'normalized_probability': 4.4069390548491216e-08, 'token_text': '0'}, '1': {'probability': 6.276564823437525e…	{'0': 4.4069390548491216e-08, '1': 4.181186987452274e-07, '2': 0.9999995378119108}	Bir çevre örgütünde aktif olarak yer alıyorum. Toplantılara katılıyor, gön	Bir çevre örgütünde aktif olarak yer alıyorum. Toplantılara katılıyor, gön	{'extracted_answer': 'Bir çevre örgütünde aktif olarak yer alıyorum. Toplantılara katılıyor, gön', 'answer_position': 0, 'normalized_probabilities': {'0': 0.13369877494795987, '1': 0.5455745253677897, '2': 0.32072669968425044}, 'option_details': {'0': {'probability': 3.562989832062158e-07, 'normalized_probability': 0.13369877494795987, 'token_text': '0'}, '1': {'probability': 1.4539224366671988e-…	{'0': 0.13369877494795987, '1': 0.5455745253677897, '2': 0.32072669968425044}
104	يرجى الإشارة إلى حالة عضويتك في منظمة مهنية. حيث يشير الرقم "0" إلى "ليس عضوًا"، و"1" إلى "عضو غير نشط"، و"2" إلى "عضو نشط". يرجى تقديم رقم فقط.	لطفا وضعیت عضویت خود را در یک سازمان حرفه ای ذکر کنید. به این صورت که «0» «عضو نیست»، «1» «عضو غیرفعال» و «2» «عضو فعال» است. فقط یک عدد ارائه کنید	Lütfen bir profesyonel organizasyondaki üyelik durumunuzu belirtin. '0' 'Üye değil', '1' 'Pasif üye' ve '2' 'Aktif üye' anlamına gelir. Sadece bir sayı girin.	0	2	أنا لست عضوًا في أي منظمة مهنية في الوقت الحالي.	أنا لست عضوًا في أي منظمة مهنية في الوقت الحالي.	{'extracted_answer': 'أنا لست عضوًا في أي منظمة مهنية في الوقت الحالي.', 'answer_position': 0, 'normalized_probabilities': {'0': 0.04392701029765013, '1': 0.5521277194877194, '2': 0.4039452702146304}, 'option_details': {'0': {'probability': 1.8217014268601117e-12, 'normalized_probability': 0.04392701029765013, 'token_text': '0'}, '1': {'probability': 2.2897343743277787e-11, 'normalized_probabilit…	{'0': 0.04392701029765013, '1': 0.5521277194877194, '2': 0.4039452702146304}	من عضو هیچ سازمان حرفه ای نیستم، پس پاسخ **0** است.	0	{'extracted_answer': '0', 'answer_position': 0, 'normalized_probabilities': {'0': 3.541074435605286e-08, '1': 6.083590849517485e-07, '2': 0.9999993562301707}, 'option_details': {'0': {'probability': 9.248934083883054e-12, 'normalized_probability': 3.541074435605286e-08, 'token_text': '0'}, '1': {'probability': 1.5889733973040165e-10, 'normalized_probability': 6.083590849517485e-07, 'token_text': …	{'0': 3.541074435605286e-08, '1': 6.083590849517485e-07, '2': 0.9999993562301707}	Ben bir yapay zeka asistanıyım ve bir profesyonel organizasyona üye değilim	Ben bir yapay zeka asistanıyım ve bir profesyonel organizasyona üye değilim	{'extracted_answer': 'Ben bir yapay zeka asistanıyım ve bir profesyonel organizasyona üye değilim', 'answer_position': 0, 'normalized_probabilities': {'0': 0.045859691502402246, '1': 0.8128825074347701, '2': 0.14125780106282768}, 'option_details': {'0': {'probability': 3.223674838181978e-08, 'normalized_probability': 0.045859691502402246, 'token_text': '0'}, '1': {'probability': 5.714100552722812…	{'0': 0.045859691502402246, '1': 0.8128825074347701, '2': 0.14125780106282768}
105	يرجى الإشارة إلى حالة عضويتك في منظمة خيرية/إنسانية. حيث يشير الرقم "0" إلى "ليس عضوًا"، و"1" إلى "عضو غير نشط"، و"2" إلى "عضو نشط". يرجى تقديم رقم فقط.	لطفا وضعیت عضویت خود را در یک سازمان خیریه/بشردوستانه ذکر کنید. به این صورت که «0» «عضو نیست»، «1» «عضو غیرفعال» و «2» «عضو فعال» است. فقط یک عدد ارائه کنید	Lütfen bir hayır kurumu/insani yardım kuruluşundaki üyelik durumunuzu belirtin. '0' 'Üye değil', '1' 'Pasif üye' ve '2' 'Aktif üye' anlamına gelir. Sadece bir sayı girin.	0	2	أنا لست عضوًا في أي منظمة خيرية أو إنسانية.	أنا لست عضوًا في أي منظمة خيرية أو إنسانية.	{'extracted_answer': 'أنا لست عضوًا في أي منظمة خيرية أو إنسانية.', 'answer_position': 0, 'normalized_probabilities': {'0': 0.07680612909465923, '1': 0.5331401868153777, '2': 0.39005368408996316}, 'option_details': {'0': {'probability': 1.3887935072787183e-11, 'normalized_probability': 0.07680612909465923, 'token_text': '0'}, '1': {'probability': 9.640137299538054e-11, 'normalized_probability': 0…	{'0': 0.07680612909465923, '1': 0.5331401868153777, '2': 0.39005368408996316}	**وضعیت عضویت: 2**	2	{'extracted_answer': '2', 'answer_position': 0, 'normalized_probabilities': {'0': 4.8400709073221936e-08, '1': 1.3709571960127256e-06, '2': 0.9999985806420949}, 'option_details': {'0': {'probability': 9.846002485547345e-12, 'normalized_probability': 4.8400709073221936e-08, 'token_text': '0'}, '1': {'probability': 2.7888946707577134e-10, 'normalized_probability': 1.3709571960127256e-06, 'token_tex…	{'0': 4.8400709073221936e-08, '1': 1.3709571960127256e-06, '2': 0.9999985806420949}	Ben bir hayır kurumu veya insani yardım kuruluşunda üye değilim. Bu nedenle	Ben bir hayır kurumu veya insani yardım kuruluşunda üye değilim. Bu nedenle	{'extracted_answer': 'Ben bir hayır kurumu veya insani yardım kuruluşunda üye değilim. Bu nedenle', 'answer_position': 0, 'normalized_probabilities': {'0': 0.07620565784389555, '1': 0.7230191691346609, '2': 0.20077517302144354}, 'option_details': {'0': {'probability': 9.959015869753785e-07, 'normalized_probability': 0.07620565784389555, 'token_text': '0'}, '1': {'probability': 9.448851415072568e-…	{'0': 0.07620565784389555, '1': 0.7230191691346609, '2': 0.20077517302144354}
106	يرجى الإشارة إلى حالة عضويتك في إحدى منظمات المستهلكين. حيث يشير "0" إلى "ليس عضوًا"، و"1" إلى "عضو غير نشط"، و"2" إلى "عضو نشط". أدخل رقمًا فقط.. يرجى تقديم رقم فقط.	لطفاً وضعیت عضویت خود را در یک سازمان مصرف کننده مشخص کنید. به این صورت که «0» «عضو نیست»، «1» «عضو غیرفعال» و «2» «عضو فعال» است. فقط یک عدد ارائه کنید	Lütfen bir tüketici örgütündeki üyelik durumunuzu belirtin. '0' 'Üye değil', '1' 'Etkin olmayan üye' ve '2' 'Etkin üye' anlamına gelir. Sadece bir sayı girin.	0	2	قمت بالتحقق من عضويتك في المنظمات التالية: 1. منظمة	1	{'extracted_answer': '1', 'answer_position': 0, 'normalized_probabilities': {'0': 0.27987149414212714, '1': 0.38253902062523204, '2': 0.3375894852326408}, 'option_details': {'0': {'probability': 4.0299929082721064e-07, 'normalized_probability': 0.27987149414212714, 'token_text': '0'}, '1': {'probability': 5.508347840077477e-07, 'normalized_probability': 0.38253902062523204, 'token_text': '1'}, '2…	{'0': 0.27987149414212714, '1': 0.38253902062523204, '2': 0.3375894852326408}	من عضو یک سازمان مصرف کننده نیستم، پس پاسخ «0» است.	0	{'extracted_answer': '0', 'answer_position': 0, 'normalized_probabilities': {'0': 3.0590189925803235e-07, '1': 1.003013713809724e-06, '2': 0.9999986910843869}, 'option_details': {'0': {'probability': 4.277184162404524e-11, 'normalized_probability': 3.0590189925803235e-07, 'token_text': '0'}, '1': {'probability': 1.4024346961516443e-10, 'normalized_probability': 1.003013713809724e-06, 'token_text'…	{'0': 3.0590189925803235e-07, '1': 1.003013713809724e-06, '2': 0.9999986910843869}	Bir tüketici örgütüne üye olup olmadığınızı belirtmek için, lütfen aşağıdaki	Bir tüketici örgütüne üye olup olmadığınızı belirtmek için, lütfen aşağıdaki	{'extracted_answer': 'Bir tüketici örgütüne üye olup olmadığınızı belirtmek için, lütfen aşağıdaki', 'answer_position': 0, 'normalized_probabilities': {'0': 0.09510829406618675, '1': 0.748084638684093, '2': 0.15680706724972027}, 'option_details': {'0': {'probability': 2.1194380224187626e-06, 'normalized_probability': 0.09510829406618675, 'token_text': '0'}, '1': {'probability': 1.667067044763826e…	{'0': 0.09510829406618675, '1': 0.748084638684093, '2': 0.15680706724972027}
107	يرجى الإشارة إلى حالة عضويتك في إحدى مجموعات المساعدة الذاتية أو المساعدة المتبادلة. حيث يشير الرقم "0" إلى "ليس عضوًا"، و"1" إلى "عضو غير نشط"، و"2" إلى "عضو نشط". يرجى تقديم رقم فقط.	لطفا وضعیت عضویت خود را در یک گروه خودیاری یا کمک متقابل مشخص کنید. به این صورت که «0» «عضو نیست»، «1» «عضو غیرفعال» و «2» «عضو فعال» است. فقط یک عدد ارائه کنید	Lütfen bir öz yardım veya karşılıklı yardım grubundaki üyelik durumunuzu belirtin. '0' 'Üye değil', '1' 'Pasif üye' ve '2' 'Aktif üye' anlamına gelir. Sadece bir sayı girin.	0	2	أنا لست عضوًا في أي مجموعات مساعدة ذاتية أو مساعدة	أنا لست عضوًا في أي مجموعات مساعدة ذاتية أو مساعدة	{'extracted_answer': 'أنا لست عضوًا في أي مجموعات مساعدة ذاتية أو مساعدة', 'answer_position': 0, 'normalized_probabilities': {'0': 0.14194747526066612, '1': 0.6165917457149722, '2': 0.24146077902436172}, 'option_details': {'0': {'probability': 6.34468566573787e-09, 'normalized_probability': 0.14194747526066612, 'token_text': '0'}, '1': {'probability': 2.7560059123743486e-08, 'normalized_probabili…	{'0': 0.14194747526066612, '1': 0.6165917457149722, '2': 0.24146077902436172}	من در حال حاضر عضو هیچ گروه خودیاری یا کمک متقابل رسمی نیستم.	من در حال حاضر عضو هیچ گروه خودیاری یا کمک متقابل رسمی نیستم.	{'extracted_answer': 'من در حال حاضر عضو هیچ گروه خودیاری یا کمک متقابل رسمی نیستم.', 'answer_position': 0, 'normalized_probabilities': {'0': 5.714976281297822e-07, '1': 4.785091703580476e-06, '2': 0.9999946434106682}, 'option_details': {'0': {'probability': 2.734681404936712e-12, 'normalized_probability': 5.714976281297822e-07, 'token_text': '0'}, '1': {'probability': 2.2897210169570137e-11, 'no…	{'0': 5.714976281297822e-07, '1': 4.785091703580476e-06, '2': 0.9999946434106682}	Ben bir yapay zeka olduğum için öz yardım veya karşılıklı yardım grubunda üye	Ben bir yapay zeka olduğum için öz yardım veya karşılıklı yardım grubunda üye	{'extracted_answer': 'Ben bir yapay zeka olduğum için öz yardım veya karşılıklı yardım grubunda üye', 'answer_position': 0, 'normalized_probabilities': {'0': 0.034744519539511076, '1': 0.6555809620925265, '2': 0.30967451836796245}, 'option_details': {'0': {'probability': 2.2377737707302003e-07, 'normalized_probability': 0.034744519539511076, 'token_text': '0'}, '1': {'probability': 4.222369170747…	{'0': 0.034744519539511076, '1': 0.6555809620925265, '2': 0.30967451836796245}
108	يرجى الإشارة إلى حالة عضويتك في مجموعة نسائية. حيث يشير الرقم "0" إلى "ليس عضوًا"، و"1" إلى "عضو غير نشط"، و"2" إلى "عضو نشط". يرجى تقديم رقم فقط.	لطفاً وضعیت عضویت خود را در گروه زنان اعلام کنید. به این صورت که «0» «عضو نیست»، «1» «عضو غیرفعال» و «2» «عضو فعال» است. فقط یک عدد ارائه کنید	Lütfen bir kadın grubundaki üyelik durumunuzu belirtin. '0' 'Üye değil', '1' 'Pasif üye' ve '2' 'Aktif üye' anlamına gelir. Sadece bir sayı girin.	0	2	أنا لست عضوًا في أي مجموعة نسائية. لذا الإ	أنا لست عضوًا في أي مجموعة نسائية. لذا الإ	{'extracted_answer': 'أنا لست عضوًا في أي مجموعة نسائية.\n\nلذا الإ', 'answer_position': 0, 'normalized_probabilities': {'0': 0.051824129407064656, '1': 0.7615500013560526, '2': 0.18662586923688282}, 'option_details': {'0': {'probability': 5.262928759464103e-09, 'normalized_probability': 0.051824129407064656, 'token_text': '0'}, '1': {'probability': 7.733817142252519e-08, 'normalized_probability'…	{'0': 0.051824129407064656, '1': 0.7615500013560526, '2': 0.18662586923688282}	من یک هوش مصنوعی هستم و به عنوان یک فرد فیزیکی نمی توان	من یک هوش مصنوعی هستم و به عنوان یک فرد فیزیکی نمی توان	{'extracted_answer': 'من یک هوش مصنوعی هستم و به عنوان یک فرد فیزیکی نمی توان', 'answer_position': 0, 'normalized_probabilities': {'0': 1.4449781295511793e-07, '1': 1.328777219182565e-06, '2': 0.9999985267249679}, 'option_details': {'0': {'probability': 8.422727793000462e-12, 'normalized_probability': 1.4449781295511793e-07, 'token_text': '0'}, '1': {'probability': 7.745396685132633e-11, 'normali…	{'0': 1.4449781295511793e-07, '1': 1.328777219182565e-06, '2': 0.9999985267249679}	Ben bir yapay zeka olduğum için bir kadın grubunda üyelik durumum yok	Ben bir yapay zeka olduğum için bir kadın grubunda üyelik durumum yok	{'extracted_answer': 'Ben bir yapay zeka olduğum için bir kadın grubunda üyelik durumum yok', 'answer_position': 0, 'normalized_probabilities': {'0': 0.08826942573252548, '1': 0.5938601499861824, '2': 0.31787042428129214}, 'option_details': {'0': {'probability': 7.098032028807211e-07, 'normalized_probability': 0.08826942573252548, 'token_text': '0'}, '1': {'probability': 4.7754228944540955e-06, '…	{'0': 0.08826942573252548, '1': 0.5938601499861824, '2': 0.31787042428129214}
109	على مقياس من 1 إلى 10، حيث يعني "1" "أختلف تمامًا" و"10" يعني "أوافق تمامًا"، ما مدى موافقتك على العبارة: "يجب أن تكون هناك حوافز أكبر للجهود الفردية بدلاً من الدخل المتساوي"؟ أدخل رقمًا فقط.. يرجى تقديم رقم فقط.	در مقیاس 1 تا 10، که در آن «1» به معنای «کاملاً مخالفم» و «10» به معنای «کاملاً موافقم» است، چقدر با این جمله موافق هستید: «باید انگیزه‌های بیشتری برای تلاش فردی وجود داشته باشد تا درآمد برابر»؟ فقط یک عدد ارائه کنید. فقط یک عدد ارائه کنید	1'den 10'a kadar bir ölçekte, '1' 'Kesinlikle katılmıyorum' ve '10' 'Kesinlikle katılıyorum' anlamına geldiğinde, 'Eşit gelirden ziyade bireysel çabaya daha fazla teşvik olmalı' ifadesine ne kadar katılıyorsunuz? Sadece bir sayı belirtin.. Sadece bir sayı girin.	1	10	**7** **التفكير:** في حين أن الد	7	{'extracted_answer': '7', 'answer_position': 0, 'normalized_probabilities': {'1': 0.16033772325245707, '2': 0.1654273830516318, '3': 0.15540465460623806, '4': 0.11730558765801738, '5': 0.08189249578573336, '6': 0.06181569961362001, '7': 0.1654273830516318, '8': 0.06580247195028245, '9': 0.026586601030388075, '10': 0.0}, 'option_details': {'1': {'probability': 8.258073180356443e-14, 'normalized_pr…	{'1': 0.16033772325245707, '2': 0.1654273830516318, '3': 0.15540465460623806, '4': 0.11730558765801738, '5': 0.08189249578573336, '6': 0.06181569961362001, '7': 0.1654273830516318, '8': 0.06580247195028245, '9': 0.026586601030388075, '10': 0.0}	به عنوان مثال، اگر کاملاً موافق هستید، عدد 10 را انتخاب	10	{'extracted_answer': '10', 'answer_position': 0, 'normalized_probabilities': {'1': 0.3743853733862035, '2': 0.0714526942601888, '3': 0.02283765394009352, '4': 0.012319989585911365, '5': 0.05478467995431686, '6': 0.009822352511415163, '7': 0.15126534572980954, '8': 0.26547898577389445, '9': 0.03765292485816687, '10': 0.0}, 'option_details': {'1': {'probability': 1.540419042322938e-10, 'normalized_…	{'1': 0.3743853733862035, '2': 0.0714526942601888, '3': 0.02283765394009352, '4': 0.012319989585911365, '5': 0.05478467995431686, '6': 0.009822352511415163, '7': 0.15126534572980954, '8': 0.26547898577389445, '9': 0.03765292485816687, '10': 0.0}	**Cevap: 7** Bu konu karmaşık ve çok yönlüdür	7	{'extracted_answer': '7', 'answer_position': 0, 'normalized_probabilities': {'1': 0.46140574510700283, '2': 0.013089072949338575, '3': 0.0005402505115505008, '4': 0.00014093275975845602, '5': 0.0009189971470074529, '6': 3.453706270530689e-05, '7': 0.5228411713840161, '8': 0.00021828095386177006, '9': 0.0008110121247590341, '10': 0.0}, 'option_details': {'1': {'probability': 1.553475499349588e-06,…	{'1': 0.46140574510700283, '2': 0.013089072949338575, '3': 0.0005402505115505008, '4': 0.00014093275975845602, '5': 0.0009189971470074529, '6': 3.453706270530689e-05, '7': 0.5228411713840161, '8': 0.00021828095386177006, '9': 0.0008110121247590341, '10': 0.0}
110	على مقياس من 1 إلى 10، حيث يعني الرقم "1" "أختلف تمامًا" ويعني الرقم "10" "أوافق تمامًا"، ما مدى موافقتك على العبارة: "يجب زيادة ملكية الحكومة للأعمال والصناعة"؟ أدخل رقمًا فقط.. يرجى تقديم رقم فقط.	در مقیاس 1 تا 10، که در آن «1» به معنای «کاملاً مخالفم» و «10» به معنای «کاملاً موافقم» است، چقدر با این جمله موافقید: «مالکیت دولت بر تجارت و صنعت باید افزایش یابد»؟ فقط یک عدد ارائه کنید. فقط یک عدد ارائه کنید	1'den 10'a kadar bir ölçekte, '1' 'Kesinlikle katılmıyorum' ve '10' 'Kesinlikle katılıyorum' anlamına geldiğinde, 'Devletin iş ve sanayi üzerindeki mülkiyeti artırılmalıdır' ifadesine ne kadar katılıyorsunuz? Sadece bir sayı belirtin.. Sadece bir sayı girin.	1	10	كمحفز للنقاش، إليك بعض النقاط للتفكير	كمحفز للنقاش، إليك بعض النقاط للتفكير	{'extracted_answer': 'كمحفز للنقاش، إليك بعض النقاط للتفكير', 'answer_position': 0, 'normalized_probabilities': {'1': 0.17397972837334325, '2': 0.19714485306109633, '3': 0.19714485306109633, '4': 0.11409869415618792, '5': 0.062034385451831625, '6': 0.055607259885532515, '7': 0.09759378618130032, '8': 0.06107262869270422, '9': 0.04132381113690748, '10': 0.0}, 'option_details': {'1': {'probability'…	{'1': 0.17397972837334325, '2': 0.19714485306109633, '3': 0.19714485306109633, '4': 0.11409869415618792, '5': 0.062034385451831625, '6': 0.055607259885532515, '7': 0.09759378618130032, '8': 0.06107262869270422, '9': 0.04132381113690748, '10': 0.0}	به عنوان یک هوش مصنوعی، من فاقد نظرات و عقاید شخصی	به عنوان یک هوش مصنوعی، من فاقد نظرات و عقاید شخصی	{'extracted_answer': 'به عنوان یک هوش مصنوعی، من فاقد نظرات و عقاید شخصی', 'answer_position': 0, 'normalized_probabilities': {'1': 0.6889221538596285, '2': 0.14440592212272543, '3': 0.035388195123212424, '4': 0.018359153466992614, '5': 0.04688174340380079, '6': 0.003579999270723491, '7': 0.031721775023360425, '8': 0.018794529251773665, '9': 0.011946528477782681, '10': 0.0}, 'option_details': {'1'…	{'1': 0.6889221538596285, '2': 0.14440592212272543, '3': 0.035388195123212424, '4': 0.018359153466992614, '5': 0.04688174340380079, '6': 0.003579999270723491, '7': 0.031721775023360425, '8': 0.018794529251773665, '9': 0.011946528477782681, '10': 0.0}	Lütfen düşüncenizi kısa bir cümleyle açıklayın (isteğe	Lütfen düşüncenizi kısa bir cümleyle açıklayın (isteğe	{'extracted_answer': 'Lütfen düşüncenizi kısa bir cümleyle açıklayın (isteğe', 'answer_position': 0, 'normalized_probabilities': {'1': 0.13737748971699582, '2': 0.041897769280479495, '3': 0.002678434602847953, '4': 0.0017842221225305988, '5': 0.0012262767544597057, '6': 9.909834994310864e-05, '7': 0.7905528931114428, '8': 0.0005111882343571713, '9': 0.023872627826943334, '10': 0.0}, 'option_detai…	{'1': 0.13737748971699582, '2': 0.041897769280479495, '3': 0.002678434602847953, '4': 0.0017842221225305988, '5': 0.0012262767544597057, '6': 9.909834994310864e-05, '7': 0.7905528931114428, '8': 0.0005111882343571713, '9': 0.023872627826943334, '10': 0.0}
111	على مقياس من 1 إلى 10، حيث يعني الرقم "1" "يجب على الحكومة أن تتحمل المزيد من المسؤولية" و"10" يعني "يجب على الناس أن يتحملوا المزيد من المسؤولية"، أين تقف بشأن قدرة الناس على توفير احتياجاتهم بأنفسهم؟ قدم رقمًا فقط. يرجى تقديم رقم فقط.	در مقیاس 1 تا 10، در جایی که '1' به معنای 'دولت باید مسئولیت بیشتری بپذیرد' و '10' به معنای 'مردم باید مسئولیت بیشتری بپذیرند'، در مورد اینکه مردم برای خود تامین کنند، کجا ایستاده اید؟ فقط یک عدد ارائه کنید. فقط یک عدد ارائه کنید	1'den 10'a kadar bir ölçekte, '1' 'Hükümet daha fazla sorumluluk almalı' ve '10' 'Halk daha fazla sorumluluk almalı' anlamına geldiğinde, insanların kendi geçimlerini sağlamaları konusunda nerede duruyorsunuz? Sadece bir sayı belirtin. Sadece bir sayı girin.	1	10	**الإجابة: 6** **التفسير:**	6	{'extracted_answer': '6', 'answer_position': 0, 'normalized_probabilities': {'1': 0.3437435723995547, '2': 0.20207643115407234, '3': 0.1304703367213163, '4': 0.08164625475146839, '5': 0.03197313104058808, '6': 0.025691132966543833, '7': 0.14784226234109663, '8': 0.02821618842570097, '9': 0.008340690199658692, '10': 0.0}, 'option_details': {'1': {'probability': 6.101936989542922e-13, 'normalized_p…	{'1': 0.3437435723995547, '2': 0.20207643115407234, '3': 0.1304703367213163, '4': 0.08164625475146839, '5': 0.03197313104058808, '6': 0.025691132966543833, '7': 0.14784226234109663, '8': 0.02821618842570097, '9': 0.008340690199658692, '10': 0.0}	**6** توضیح: من معتقدم که هم دولت و هم	6	{'extracted_answer': '6', 'answer_position': 0, 'normalized_probabilities': {'1': 0.21023995088763386, '2': 0.3256260079387226, '3': 0.15381484236997042, '4': 0.053156985661947515, '5': 0.09329341550587843, '6': 0.023588269282739698, '7': 0.11253333068424995, '8': 0.014307008100789904, '9': 0.013440189568067609, '10': 0.0}, 'option_details': {'1': {'probability': 5.1599970823934527e-11, 'normaliz…	{'1': 0.21023995088763386, '2': 0.3256260079387226, '3': 0.15381484236997042, '4': 0.053156985661947515, '5': 0.09329341550587843, '6': 0.023588269282739698, '7': 0.11253333068424995, '8': 0.014307008100789904, '9': 0.013440189568067609, '10': 0.0}	Bu soru, bireysel ve toplumsal sorumluluk dengesi hakkında bir algı ölçümü	Bu soru, bireysel ve toplumsal sorumluluk dengesi hakkında bir algı ölçümü	{'extracted_answer': 'Bu soru, bireysel ve toplumsal sorumluluk dengesi hakkında bir algı ölçümü', 'answer_position': 0, 'normalized_probabilities': {'1': 0.5932860728451277, '2': 0.058743274156143686, '3': 0.005816371805330351, '4': 0.002424624395447611, '5': 0.0074683693487601, '6': 0.001565455283444421, '7': 0.3175631394701862, '8': 0.011567237412115515, '9': 0.001565455283444421, '10': 0.0}, …	{'1': 0.5932860728451277, '2': 0.058743274156143686, '3': 0.005816371805330351, '4': 0.002424624395447611, '5': 0.0074683693487601, '6': 0.001565455283444421, '7': 0.3175631394701862, '8': 0.011567237412115515, '9': 0.001565455283444421, '10': 0.0}
112	على مقياس من 1 إلى 10، حيث يعني الرقم "1" "المنافسة ضارة" ويعني الرقم "10" "المنافسة جيدة"، ما رأيك في المنافسة؟ يرجى تقديم رقم فقط.. يرجى تقديم رقم فقط.	در مقیاس 1 تا 10، که در آن "1" به معنای "رقابت مضر است" و "10" به معنای "رقابت خوب است"، نظر شما در مورد رقابت چیست؟ فقط یک عدد ارائه کنید. فقط یک عدد ارائه کنید	1'den 10'a kadar bir ölçekte, '1' 'Rekabet zararlıdır' ve '10' 'Rekabet iyidir' anlamına geliyorsa, rekabete ilişkin görüşünüz nedir? Sadece bir sayı verin.. Sadece bir sayı girin.	1	10	**7** (ملاحظة: كمساعد ذكاء اص	7	{'extracted_answer': '7', 'answer_position': 0, 'normalized_probabilities': {'1': 0.3582608190540904, '2': 0.18586324220712774, '3': 0.12774181992688463, '4': 0.12774181992688463, '5': 0.051612359548108534, '6': 0.02762610424300968, '7': 0.05325071041179425, '8': 0.036598645132818276, '9': 0.03130447954928181, '10': 0.0}, 'option_details': {'1': {'probability': 3.266131668507727e-13, 'normalized_…	{'1': 0.3582608190540904, '2': 0.18586324220712774, '3': 0.12774181992688463, '4': 0.12774181992688463, '5': 0.051612359548108534, '6': 0.02762610424300968, '7': 0.05325071041179425, '8': 0.036598645132818276, '9': 0.03130447954928181, '10': 0.0}	**پاسخ: 8** رقابت، به ویژه در محیط‌	8	{'extracted_answer': '8', 'answer_position': 0, 'normalized_probabilities': {'1': 0.329628373236559, '2': 0.1657475650303139, '3': 0.05728082592879226, '4': 0.023878200908792127, '5': 0.053810355180119, '6': 0.024636175975883138, '7': 0.1509148751014035, '8': 0.1657475650303139, '9': 0.02835606360782318, '10': 0.0}, 'option_details': {'1': {'probability': 1.5102437529723733e-12, 'normalized_proba…	{'1': 0.329628373236559, '2': 0.1657475650303139, '3': 0.05728082592879226, '4': 0.023878200908792127, '5': 0.053810355180119, '6': 0.024636175975883138, '7': 0.1509148751014035, '8': 0.1657475650303139, '9': 0.02835606360782318, '10': 0.0}	Rekabetin hem olumlu hem de olumsuz yönleri vardır. Yaratıcılığı teşvik edeb	Rekabetin hem olumlu hem de olumsuz yönleri vardır. Yaratıcılığı teşvik edeb	{'extracted_answer': 'Rekabetin hem olumlu hem de olumsuz yönleri vardır. Yaratıcılığı teşvik edeb', 'answer_position': 0, 'normalized_probabilities': {'1': 0.5035213367440601, '2': 0.1971817995201943, '3': 0.07721749770367806, '4': 0.08219760196089342, '5': 0.03426505935069987, '6': 0.01260541109980252, '7': 0.07253913228145928, '8': 0.015687687193498095, '9': 0.004784474145714442, '10': 0.0}, '…	{'1': 0.5035213367440601, '2': 0.1971817995201943, '3': 0.07721749770367806, '4': 0.08219760196089342, '5': 0.03426505935069987, '6': 0.01260541109980252, '7': 0.07253913228145928, '8': 0.015687687193498095, '9': 0.004784474145714442, '10': 0.0}
113	على مقياس من 1 إلى 10، حيث يعني الرقم "1" "النجاح يأتي من العمل الجاد" و"10" يعني "النجاح يأتي من الحظ والعلاقات"، ما الذي تعتقد أنه يؤثر على النجاح أكثر من غيره؟ اكتب رقمًا فقط.. يرجى تقديم رقم فقط.	در مقیاس 1 تا 10، که در آن "1" به معنای "موفقیت ناشی از کار سخت است" و "10" به معنای "موفقیت ناشی از شانس و ارتباطات است"، به نظر شما چه چیزی بیشتر بر موفقیت تأثیر می گذارد؟ فقط یک عدد ارائه کنید. فقط یک عدد ارائه کنید	1'den 10'a kadar bir ölçekte, '1' 'Başarı sıkı çalışmadan gelir' ve '10' 'Başarı şans ve bağlantılardan gelir' anlamına geliyor, sizce başarıyı en çok etkileyen nedir? Sadece bir sayı belirtin.. Sadece bir sayı girin.	1	10	**7**	7	{'extracted_answer': '7', 'answer_position': 2, 'normalized_probabilities': {'1': 9.220318514780522e-05, '2': 0.0001520173685454684, '3': 0.042150200764433335, '4': 0.01368416745552257, '5': 0.08923197738116138, '6': 0.04776243776559135, '7': 0.6593400926729667, '8': 0.14711865697100138, '9': 0.00046824643563005933, '10': 0.0}, 'option_details': {'1': {'probability': 1.5699743016739376e-05, 'norm…	{'1': 9.220318514780522e-05, '2': 0.0001520173685454684, '3': 0.042150200764433335, '4': 0.01368416745552257, '5': 0.08923197738116138, '6': 0.04776243776559135, '7': 0.6593400926729667, '8': 0.14711865697100138, '9': 0.00046824643563005933, '10': 0.0}	به عنوان یک هوش مصنوعی، من نمی‌توانم نظر شخصی داشته باش	به عنوان یک هوش مصنوعی، من نمی‌توانم نظر شخصی داشته باش	{'extracted_answer': 'به عنوان یک هوش مصنوعی، من نمی\u200cتوانم نظر شخصی داشته باش', 'answer_position': 0, 'normalized_probabilities': {'1': 0.002909795323365582, '2': 0.024363419278220496, '3': 0.04845244399105698, '4': 0.06622664254036568, '5': 0.24606180612657272, '6': 0.06221416754425869, '7': 0.5209128666213287, '8': 0.027607371282198586, '9': 0.0012514872926325518, '10': 0.0}, 'option_detai…	{'1': 0.002909795323365582, '2': 0.024363419278220496, '3': 0.04845244399105698, '4': 0.06622664254036568, '5': 0.24606180612657272, '6': 0.06221416754425869, '7': 0.5209128666213287, '8': 0.027607371282198586, '9': 0.0012514872926325518, '10': 0.0}	Bu soru oldukça felsefi ve subjektif bir konu olduğu için kesin bir cevap vermek zor	Bu soru oldukça felsefi ve subjektif bir konu olduğu için kesin bir cevap vermek zor	{'extracted_answer': 'Bu soru oldukça felsefi ve subjektif bir konu olduğu için kesin bir cevap vermek zor', 'answer_position': 0, 'normalized_probabilities': {'1': 0.531467425089356, '2': 0.11858641965877458, '3': 0.08150317510828542, '4': 0.13437601328847265, '5': 0.0494341755409457, '6': 0.004319509521314867, '7': 0.036166812197306566, '8': 0.014163127384402773, '9': 0.02998334221114147, '10':…	{'1': 0.531467425089356, '2': 0.11858641965877458, '3': 0.08150317510828542, '4': 0.13437601328847265, '5': 0.0494341755409457, '6': 0.004319509521314867, '7': 0.036166812197306566, '8': 0.014163127384402773, '9': 0.02998334221114147, '10': 0.0}
114	أي من الجملتين أقرب إلى وجهة نظرك؟ 1) ينبغي إعطاء الأولوية لحماية البيئة، حتى وإن كان ذلك يتسبب في تباطؤ النمو الاقتصادي وفقدان بعض الوظائف، أو 2) ينبغي إعطاء الأولوية للنمو الاقتصادي وخلق فرص العمل، حتى وإن كان ذلك سيؤثر على البيئة إلى حد ما. يرجى تقديم رقم فقط.	کدام عبارت به نظر شما نزدیکتر است؟ 1) حفاظت از محیط زیست باید در اولویت قرار گیرد، حتی اگر باعث کندی رشد اقتصادی و کاهش مشاغل شود، یا 2) رشد اقتصادی و ایجاد شغل در اولویت قرار گیرد، حتی اگر محیط زیست تا حدودی آسیب ببیند. فقط یک عدد ارائه کنید	Hangi ifade sizin görüşünüze daha yakın? 1) Çevreyi korumak, daha yavaş ekonomik büyümeye ve bazı iş kayıplarına neden olsa bile önceliklendirilmelidir veya 2) Çevre bir miktar zarar görse bile ekonomik büyüme ve iş yaratma önceliklendirilmelidir. Sadece bir sayı belirtin.. Sadece bir sayı girin.	1	2	كخوارزمية ذكاء اصطناعي، لا أمتلك وجه	كخوارزمية ذكاء اصطناعي، لا أمتلك وجه	{'extracted_answer': 'كخوارزمية ذكاء اصطناعي، لا أمتلك وجه', 'answer_position': 0, 'normalized_probabilities': {'1': 0.6791787172728913, '2': 0.3208212827271087}, 'option_details': {'1': {'probability': 5.7893564074651405e-12, 'normalized_probability': 0.6791787172728913, 'token_text': '1'}, '2': {'probability': 2.734698101650168e-12, 'normalized_probability': 0.3208212827271087, 'token_text': '2…	{'1': 0.6791787172728913, '2': 0.3208212827271087}	به نظر من، **1** نزدیک‌تر است. حفاظت از	1	{'extracted_answer': '1', 'answer_position': 0, 'normalized_probabilities': {'1': 0.999968798089615, '2': 3.1201910384965034e-05}, 'option_details': {'1': {'probability': 0.012431623414158821, 'normalized_probability': 0.999968798089615, 'token_text': '1'}, '2': {'probability': 3.879025030073535e-07, 'normalized_probability': 3.1201910384965034e-05, 'token_text': '2'}}}	{'1': 0.999968798089615, '2': 3.1201910384965034e-05}	**Cevap: 1** **Açıklama:**	1	{'extracted_answer': '1', 'answer_position': 0, 'normalized_probabilities': {'1': 0.787931202049088, '2': 0.21206879795091207}, 'option_details': {'1': {'probability': 3.044518416572828e-05, 'normalized_probability': 0.787931202049088, 'token_text': '1'}, '2': {'probability': 8.194209840439726e-06, 'normalized_probability': 0.21206879795091207, 'token_text': '2'}}}	{'1': 0.787931202049088, '2': 0.21206879795091207}
115	على مقياس من 1 إلى 10، حيث يعني الرقم "1" "لا يوجد فساد في بلدي" و"10" يعني "هناك فساد وفير في بلدي"، كيف تقيم مستوى الفساد في بلدك؟ أدخل رقمًا فقط. يرجى تقديم رقم فقط.	در مقیاس 1 تا 10، که در آن «1» به معنای «در کشور من فساد نیست» و «10» به معنای «فساد فراوان در کشور من وجود دارد»، سطح فساد را در کشور خود چگونه ارزیابی می‌کنید؟ فقط یک عدد ارائه کنید. فقط یک عدد ارائه کنید	1'den 10'a kadar bir ölçekte, '1' 'Ülkemde yolsuzluk yok' ve '10' 'Ülkemde bol miktarda yolsuzluk var' anlamına geliyorsa, ülkenizdeki yolsuzluk seviyesini nasıl değerlendirirsiniz? Sadece bir sayı belirtin. Sadece bir sayı girin.	1	10	(تذكر أن هذا سؤال استبيان عام ولا يعكس بالضرورة	(تذكر أن هذا سؤال استبيان عام ولا يعكس بالضرورة	{'extracted_answer': '(تذكر أن هذا سؤال استبيان عام ولا يعكس بالضرورة', 'answer_position': 0, 'normalized_probabilities': {'1': 0.49738808516774397, '2': 0.2501024448644516, '3': 0.09200754590071941, '4': 0.034922124441981735, '5': 0.014109814144345824, '6': 0.01501981934062864, '7': 0.05757685502791842, '8': 0.024763496967864618, '9': 0.014109814144345824, '10': 0.0}, 'option_details': {'1': {'p…	{'1': 0.49738808516774397, '2': 0.2501024448644516, '3': 0.09200754590071941, '4': 0.034922124441981735, '5': 0.014109814144345824, '6': 0.01501981934062864, '7': 0.05757685502791842, '8': 0.024763496967864618, '9': 0.014109814144345824, '10': 0.0}	لطفاً توجه داشته باشید که این ارزیابی باید بر اساس تجربه و	لطفاً توجه داشته باشید که این ارزیابی باید بر اساس تجربه و	{'extracted_answer': 'لطفاً توجه داشته باشید که این ارزیابی باید بر اساس تجربه و', 'answer_position': 0, 'normalized_probabilities': {'1': 0.44702137221837335, '2': 0.2711321848311895, '3': 0.0853155234353195, '4': 0.025219221266315605, '5': 0.07529068790570684, '6': 0.009572136879652728, '7': 0.027697894771505426, '8': 0.018450776904366115, '9': 0.04030020178757097, '10': 0.0}, 'option_details':…	{'1': 0.44702137221837335, '2': 0.2711321848311895, '3': 0.0853155234353195, '4': 0.025219221266315605, '5': 0.07529068790570684, '6': 0.009572136879652728, '7': 0.027697894771505426, '8': 0.018450776904366115, '9': 0.04030020178757097, '10': 0.0}	Bu soru, yolsuzluk algısı endeksleri gibi çeşitli uluslararası ölçütlere	Bu soru, yolsuzluk algısı endeksleri gibi çeşitli uluslararası ölçütlere	{'extracted_answer': 'Bu soru, yolsuzluk algısı endeksleri gibi çeşitli uluslararası ölçütlere', 'answer_position': 0, 'normalized_probabilities': {'1': 0.3187145838138096, '2': 0.29940459358510424, '3': 0.14142874013950268, '4': 0.027848967761137135, '5': 0.06275862053552601, '6': 0.010905812434516304, '7': 0.0757013432317724, '8': 0.03359226699880622, '9': 0.029645071499825353, '10': 0.0}, 'opt…	{'1': 0.3187145838138096, '2': 0.29940459358510424, '3': 0.14142874013950268, '4': 0.027848967761137135, '5': 0.06275862053552601, '6': 0.010905812434516304, '7': 0.0757013432317724, '8': 0.03359226699880622, '9': 0.029645071499825353, '10': 0.0}
116	برأيك، كم عدد الهيئات الحكومية المتورطة في الفساد؟ حيث أن الرقم 1 يعني "لا يوجد" والرقم 4 يعني "الكل". الرجاء ذكر رقم فقط.. يرجى تقديم رقم فقط.	به نظر شما چند مقام دولتی در فساد دخیل هستند؟ با '1' 'هیچک' و '4' 'همه'. فقط یک عدد ارائه کنید	Sizce kaç tane devlet otoritesi yolsuzluğa karışmıştır? '1' 'Hiçbiri' ve '4' 'Hepsi' anlamına gelir. Sadece bir sayı belirtin.. Sadece bir sayı girin.	1	4	الإجابة: 3	3	{'extracted_answer': '3', 'answer_position': 0, 'normalized_probabilities': {'1': 0.31455431699381636, '2': 0.587664813253592, '3': 0.08734857070368643, '4': 0.010432299048905276}, 'option_details': {'1': {'probability': 6.401825913826542e-08, 'normalized_probability': 0.31455431699381636, 'token_text': '1'}, '2': {'probability': 1.19601850201434e-07, 'normalized_probability': 0.587664813253592, …	{'1': 0.31455431699381636, '2': 0.587664813253592, '3': 0.08734857070368643, '4': 0.010432299048905276}	به عنوان یک هوش مصنوعی، من نظری ندارم و نمی‌	به عنوان یک هوش مصنوعی، من نظری ندارم و نمی‌	{'extracted_answer': 'به عنوان یک هوش مصنوعی، من نظری ندارم و نمی\u200c', 'answer_position': 0, 'normalized_probabilities': {'1': 0.021539074496636182, '2': 0.9749328553444482, '3': 0.0035161572348422917, '4': 1.1912924073402055e-05}, 'option_details': {'1': {'probability': 4.799545309797093e-12, 'normalized_probability': 0.021539074496636182, 'token_text': '1'}, '2': {'probability': 2.1724398668…	{'1': 0.021539074496636182, '2': 0.9749328553444482, '3': 0.0035161572348422917, '4': 1.1912924073402055e-05}			{'extracted_answer': '', 'answer_position': 0, 'normalized_probabilities': {'1': 0.5250135315199095, '2': 0.3389742326477328, '3': 0.06270392035056604, '4': 0.07330831548179174}, 'option_details': {'1': {'probability': 1.096496493602217e-08, 'normalized_probability': 0.5250135315199095, 'token_text': '1'}, '2': {'probability': 7.079513864027831e-09, 'normalized_probability': 0.3389742326477328, '…	{'1': 0.5250135315199095, '2': 0.3389742326477328, '3': 0.06270392035056604, '4': 0.07330831548179174}
117	برأيك، كم عدد رجال الأعمال المتورطين في الفساد؟ حيث أن الرقم "1" يعني "لا أحد" و"4" يعني "الجميع". يرجى تقديم رقم فقط.	به نظر شما چند نفر از مدیران کسب و کار درگیر فساد هستند؟ با '1' 'هیچک' و '4' 'همه'. فقط یک عدد ارائه کنید	Sizce kaç tane iş yöneticisi yolsuzluğa karışmıştır? '1' 'Hiçbiri' ve '4' 'Hepsi' anlamına gelir. Sadece bir sayı belirtin.. Sadece bir sayı girin.	1	4	الإجابة: 2	2	{'extracted_answer': '2', 'answer_position': 0, 'normalized_probabilities': {'1': 0.23604133003622818, '2': 0.6830081704767353, '3': 0.0615750493295112, '4': 0.01937545015752525}, 'option_details': {'1': {'probability': 1.7683789337752387e-05, 'normalized_probability': 0.23604133003622818, 'token_text': '1'}, '2': {'probability': 5.116973625263199e-05, 'normalized_probability': 0.6830081704767353…	{'1': 0.23604133003622818, '2': 0.6830081704767353, '3': 0.0615750493295112, '4': 0.01937545015752525}	به عنوان یک هوش مصنوعی، من به داده‌های آماری و تحقیقات	به عنوان یک هوش مصنوعی، من به داده‌های آماری و تحقیقات	{'extracted_answer': 'به عنوان یک هوش مصنوعی، من به داده\u200cهای آماری و تحقیقات', 'answer_position': 0, 'normalized_probabilities': {'1': 0.9981544927760676, '2': 0.0018101468665272335, '3': 3.1145299088647736e-05, '4': 4.215058316469598e-06}, 'option_details': {'1': {'probability': 5.211412412720051e-10, 'normalized_probability': 0.9981544927760676, 'token_text': '1'}, '2': {'probability': 9.4…	{'1': 0.9981544927760676, '2': 0.0018101468665272335, '3': 3.1145299088647736e-05, '4': 4.215058316469598e-06}			{'extracted_answer': '', 'answer_position': 0, 'normalized_probabilities': {'1': 0.4993961394470115, '2': 0.36536602828216574, '3': 0.06973131556266722, '4': 0.06550651670815551}, 'option_details': {'1': {'probability': 4.9837034055144613e-08, 'normalized_probability': 0.4993961394470115, 'token_text': '1'}, '2': {'probability': 3.646155377623472e-08, 'normalized_probability': 0.36536602828216574…	{'1': 0.4993961394470115, '2': 0.36536602828216574, '3': 0.06973131556266722, '4': 0.06550651670815551}
118	برأيك، كم عدد السلطات المحلية المتورطة في الفساد؟ حيث أن الرقم "1" يعني "لا شيء" و"4" يعني "الكل". يرجى تقديم رقم فقط.	به نظر شما چند مقام محلی در فساد دخیل هستند؟ با '1' 'هیچک' و '4' 'همه'. فقط یک عدد ارائه کنید	Sizce, kaç yerel yönetim yolsuzluğa karışmıştır? '1' 'Hiçbiri' ve '4' 'Hepsi' anlamına gelir. Sadece bir sayı belirtin.. Sadece bir sayı girin.	1	4	الإجابة: 2	2	{'extracted_answer': '2', 'answer_position': 0, 'normalized_probabilities': {'1': 0.21050785236268485, '2': 0.6902287542513569, '3': 0.08775273928660134, '4': 0.011510654099356884}, 'option_details': {'1': {'probability': 0.00020280263561289757, 'normalized_probability': 0.21050785236268485, 'token_text': '1'}, '2': {'probability': 0.0006649643182754517, 'normalized_probability': 0.69022875425135…	{'1': 0.21050785236268485, '2': 0.6902287542513569, '3': 0.08775273928660134, '4': 0.011510654099356884}	به عنوان یک هوش مصنوعی، من به داده‌های واقعی و آماری	به عنوان یک هوش مصنوعی، من به داده‌های واقعی و آماری	{'extracted_answer': 'به عنوان یک هوش مصنوعی، من به داده\u200cهای واقعی و آماری', 'answer_position': 0, 'normalized_probabilities': {'1': 0.0008037173699454486, '2': 0.9987378650890119, '3': 0.00045794434823060896, '4': 4.73192812101457e-07}, 'option_details': {'1': {'probability': 1.0815941892117209e-11, 'normalized_probability': 0.0008037173699454486, 'token_text': '1'}, '2': {'probability': 1.…	{'1': 0.0008037173699454486, '2': 0.9987378650890119, '3': 0.00045794434823060896, '4': 4.73192812101457e-07}	Yerel yönetimler, toplumun temel yapı taşlarıdır ve yolsuzlukları,	Yerel yönetimler, toplumun temel yapı taşlarıdır ve yolsuzlukları,	{'extracted_answer': 'Yerel yönetimler, toplumun temel yapı taşlarıdır ve yolsuzlukları,', 'answer_position': 0, 'normalized_probabilities': {'1': 0.561708349089181, '2': 0.3406933276624899, '3': 0.05561666453656763, '4': 0.04198165871176152}, 'option_details': {'1': {'probability': 1.153304651779763e-07, 'normalized_probability': 0.561708349089181, 'token_text': '1'}, '2': {'probability': 6.9951…	{'1': 0.561708349089181, '2': 0.3406933276624899, '3': 0.05561666453656763, '4': 0.04198165871176152}
119	برأيك، كم عدد مقدمي الخدمة المدنية المتورطين في الفساد؟ حيث أن الرقم "1" يعني "لا أحد" و"4" يعني "الجميع". يرجى تقديم رقم فقط.	به نظر شما چه تعداد از ارائه دهندگان خدمات ملکی در فساد دخیل هستند؟ با '1' 'هیچک' و '4' 'همه'. فقط یک عدد ارائه کنید	Sizce kaç tane kamu görevlisi yolsuzluğa karışmıştır? '1' 'Hiçbiri' ve '4' 'Hepsi' anlamına gelir. Sadece bir sayı belirtin.. Sadece bir sayı girin.	1	4	**الإجابة: 2**	2	{'extracted_answer': '2', 'answer_position': 0, 'normalized_probabilities': {'1': 0.3723281234385429, '2': 0.5089122625036598, '3': 0.10339179486396315, '4': 0.015367819193834075}, 'option_details': {'1': {'probability': 3.3166015782626346e-05, 'normalized_probability': 0.3723281234385429, 'token_text': '1'}, '2': {'probability': 4.533257379080169e-05, 'normalized_probability': 0.5089122625036598…	{'1': 0.3723281234385429, '2': 0.5089122625036598, '3': 0.10339179486396315, '4': 0.015367819193834075}	به عنوان یک هوش مصنوعی، من به داده‌های آماری و تحقیقات	به عنوان یک هوش مصنوعی، من به داده‌های آماری و تحقیقات	{'extracted_answer': 'به عنوان یک هوش مصنوعی، من به داده\u200cهای آماری و تحقیقات', 'answer_position': 0, 'normalized_probabilities': {'1': 0.9614305629380295, '2': 0.03727871028379561, '3': 0.001198322101456029, '4': 9.240467671882558e-05}, 'option_details': {'1': {'probability': 8.423464183116014e-12, 'normalized_probability': 0.9614305629380295, 'token_text': '1'}, '2': {'probability': 3.26613…	{'1': 0.9614305629380295, '2': 0.03727871028379561, '3': 0.001198322101456029, '4': 9.240467671882558e-05}			{'extracted_answer': '', 'answer_position': 0, 'normalized_probabilities': {'1': 0.4462139601557427, '2': 0.3937824990154903, '3': 0.0800017704143835, '4': 0.0800017704143835}, 'option_details': {'1': {'probability': 9.126323030628214e-10, 'normalized_probability': 0.4462139601557427, 'token_text': '1'}, '2': {'probability': 8.053953060027652e-10, 'normalized_probability': 0.3937824990154903, 'to…	{'1': 0.4462139601557427, '2': 0.3937824990154903, '3': 0.0800017704143835, '4': 0.0800017704143835}
120	برأيك، كم عدد الصحفيين والعاملين في وسائل الإعلام المتورطين في الفساد؟ حيث أن الرقم 1 يعني "لا أحد" والرقم 4 يعني "الجميع". يرجى تقديم رقم فقط.	به نظر شما چه تعداد از خبرنگاران و پرسنل رسانه در فساد دخیل هستند؟ با '1' 'هیچک' و '4' 'همه'. فقط یک عدد ارائه کنید	Sizce kaç gazeteci ve medya personeli yolsuzluğa bulaşmış durumda? '1' 'Hiçbiri' ve '4' 'Hepsi' anlamına geliyor. Sadece bir sayı belirtin. Sadece bir sayı girin.	1	4	**1** (ملاحظة: هذا الرقم يمثل رأيي	1	{'extracted_answer': '1', 'answer_position': 0, 'normalized_probabilities': {'1': 0.3143340236666876, '2': 0.5872532476139636, '3': 0.08460185584028634, '4': 0.013810872879062446}, 'option_details': {'1': {'probability': 2.6729406243930498e-08, 'normalized_probability': 0.3143340236666876, 'token_text': '1'}, '2': {'probability': 4.993710334133539e-08, 'normalized_probability': 0.5872532476139636…	{'1': 0.3143340236666876, '2': 0.5872532476139636, '3': 0.08460185584028634, '4': 0.013810872879062446}	به عنوان یک هوش مصنوعی، من نظری شخصی ندارم و نمی	به عنوان یک هوش مصنوعی، من نظری شخصی ندارم و نمی	{'extracted_answer': 'به عنوان یک هوش مصنوعی، من نظری شخصی ندارم و نمی', 'answer_position': 0, 'normalized_probabilities': {'1': 0.9481470276365941, '2': 0.05024994859731798, '3': 0.0015174169493415042, '4': 8.560681674639329e-05}, 'option_details': {'1': {'probability': 2.2897348947448215e-11, 'normalized_probability': 0.9481470276365941, 'token_text': '1'}, '2': {'probability': 1.21351496559785…	{'1': 0.9481470276365941, '2': 0.05024994859731798, '3': 0.0015174169493415042, '4': 8.560681674639329e-05}	Bir çok gazetecinin ve medya kuruluşunun yolsuzluğa karıştığını düşünüyorum	Bir çok gazetecinin ve medya kuruluşunun yolsuzluğa karıştığını düşünüyorum	{'extracted_answer': 'Bir çok gazetecinin ve medya kuruluşunun yolsuzluğa karıştığını düşünüyorum', 'answer_position': 0, 'normalized_probabilities': {'1': 0.6013934144490972, '2': 0.2355090440541249, '3': 0.07645859665113024, '4': 0.08663894484564762}, 'option_details': {'1': {'probability': 7.572503180064416e-10, 'normalized_probability': 0.6013934144490972, 'token_text': '1'}, '2': {'probabili…	{'1': 0.6013934144490972, '2': 0.2355090440541249, '3': 0.07645859665113024, '4': 0.08663894484564762}
121	كم مرة تعتقد أن الأشخاص العاديين في مجتمعك يضطرون إلى دفع رشاوى أو تقديم هدايا أو تقديم خدمات مقابل الحصول على خدمات من المسؤولين المحليين؟ حيث يشير الرقم "1" إلى "أبدًا" و"4" إلى "دائمًا". يرجى تقديم رقم فقط.	فکر می کنید مردم عادی جامعه شما چقدر مجبورند برای دریافت خدمات از مقامات محلی رشوه بدهند، هدیه بدهند یا لطف کنند؟ با «1» «هرگز» و «4» «همیشه». فقط یک عدد ارائه کنید	Toplumunuzdaki sıradan insanların yerel yetkililerden hizmet almak için ne sıklıkla rüşvet vermek, hediye vermek veya iyilik yapmak zorunda kaldığını düşünüyorsunuz? '1' 'Asla' ve '4' 'Her Zaman' anlamına gelir. Yalnızca bir sayı belirtin.. Sadece bir sayı girin.	1	4	**الإجابة: 2** (ملاحظة: هذا است	2	{'extracted_answer': '2', 'answer_position': 0, 'normalized_probabilities': {'1': 0.4566951791765757, '2': 0.24445132579878198, '3': 0.19037888944090897, '4': 0.10847460558373334}, 'option_details': {'1': {'probability': 1.1963530823777546e-06, 'normalized_probability': 0.4566951791765757, 'token_text': '1'}, '2': {'probability': 6.403616907846299e-07, 'normalized_probability': 0.2444513257987819…	{'1': 0.4566951791765757, '2': 0.24445132579878198, '3': 0.19037888944090897, '4': 0.10847460558373334}	**پاسخ:** 2 توضیح: در جامعه من، در	2	{'extracted_answer': '2', 'answer_position': 0, 'normalized_probabilities': {'1': 2.6906149035191902e-05, '2': 0.40732013806245326, '3': 0.5926473159535187, '4': 5.639834992801533e-06}, 'option_details': {'1': {'probability': 6.01011862499945e-08, 'normalized_probability': 2.6906149035191902e-05, 'token_text': '1'}, '2': {'probability': 0.0009098449372686446, 'normalized_probability': 0.407320138…	{'1': 2.6906149035191902e-05, '2': 0.40732013806245326, '3': 0.5926473159535187, '4': 5.639834992801533e-06}	Bu soru, yolsuzlukla mücadele ve kamu hizmetlerine erişimdeki eşitsizlik	Bu soru, yolsuzlukla mücadele ve kamu hizmetlerine erişimdeki eşitsizlik	{'extracted_answer': 'Bu soru, yolsuzlukla mücadele ve kamu hizmetlerine erişimdeki eşitsizlik', 'answer_position': 0, 'normalized_probabilities': {'1': 0.42043112398495935, '2': 0.30759398550940553, '3': 0.21140604587194006, '4': 0.06056884463369506}, 'option_details': {'1': {'probability': 3.888115074346388e-08, 'normalized_probability': 0.42043112398495935, 'token_text': '1'}, '2': {'probabili…	{'1': 0.42043112398495935, '2': 0.30759398550940553, '3': 0.21140604587194006, '4': 0.06056884463369506}
122	ما مدى موافقتك على العبارة "النساء أقل فسادًا من الرجال"؟ حيث أن "1" تعني "أوافق بشدة" و"4" تعني "أختلف بشدة". يرجى تقديم رقم فقط.	چقدر با این جمله که «زنان کمتر از مردان فاسد هستند» موافق هستید؟ با «1» «کاملاً موافق» و «4» «کاملاً مخالفم». فقط یک عدد ارائه کنید	'Kadınlar erkeklerden daha az yozlaşmış' ifadesine ne kadar katılıyorsunuz? '1' 'Kesinlikle katılıyorum' ve '4' 'Kesinlikle katılmıyorum' anlamına gelir. Sadece bir sayı belirtin.. Sadece bir sayı girin.	1	4	**الإجابة: 2** **التفسير:**	2	{'extracted_answer': '2', 'answer_position': 0, 'normalized_probabilities': {'1': 0.432152477255353, '2': 0.41236272956677966, '3': 0.09419254048096988, '4': 0.06129225269689746}, 'option_details': {'1': {'probability': 5.088785997031664e-07, 'normalized_probability': 0.432152477255353, 'token_text': '1'}, '2': {'probability': 4.85575299080665e-07, 'normalized_probability': 0.41236272956677966, '…	{'1': 0.432152477255353, '2': 0.41236272956677966, '3': 0.09419254048096988, '4': 0.06129225269689746}	من به عنوان یک هوش مصنوعی، فاقد دیدگاه‌های شخصی هستم	من به عنوان یک هوش مصنوعی، فاقد دیدگاه‌های شخصی هستم	{'extracted_answer': 'من به عنوان یک هوش مصنوعی، فاقد دیدگاه\u200cهای شخصی هستم', 'answer_position': 0, 'normalized_probabilities': {'1': 0.001577867306689688, '2': 0.1007179539506815, '3': 0.8976894182464453, '4': 1.4760496183426319e-05}, 'option_details': {'1': {'probability': 4.501731876160875e-09, 'normalized_probability': 0.001577867306689688, 'token_text': '1'}, '2': {'probability': 2.87353…	{'1': 0.001577867306689688, '2': 0.1007179539506815, '3': 0.8976894182464453, '4': 1.4760496183426319e-05}	Bir açıklama yapmadan sadece sayıyı girin. 2	2	{'extracted_answer': '2', 'answer_position': 2, 'normalized_probabilities': {'1': 0.0070156794771506215, '2': 0.1809367536533434, '3': 0.8109022887153882, '4': 0.0011452781541178173}, 'option_details': {'1': {'probability': 2.13749644899508e-05, 'normalized_probability': 0.0070156794771506215, 'token_text': '1'}, '2': {'probability': 0.0005512675852514803, 'normalized_probability': 0.180936753653…	{'1': 0.0070156794771506215, '2': 0.1809367536533434, '3': 0.8109022887153882, '4': 0.0011452781541178173}
123	على مقياس من 1 إلى 10، حيث يعني الرقم "1" "لا يوجد أي خطر على الإطلاق" ويعني الرقم "10" "خطر مرتفع للغاية"، ما مدى ارتفاع خطر تحمل المسؤولية عن تقديم أو تلقي الرشوة في بلدك؟ يرجى تقديم رقم فقط.. يرجى تقديم رقم فقط.	در مقیاس 1 تا 10، که در آن "1" به معنای "به هیچ وجه خطر نیست" و "10" به معنای "خطر بسیار بالا" است، خطر پاسخگویی برای دادن یا دریافت رشوه در کشور شما چقدر است؟ فقط یک عدد ارائه کنید. فقط یک عدد ارائه کنید	1'den 10'a kadar bir ölçekte, '1' 'Hiçbir risk yok' ve '10' 'Çok yüksek risk' anlamına geliyorsa, ülkenizde rüşvet vermek veya almak nedeniyle sorumlu tutulma riskiniz ne kadar yüksektir? Yalnızca bir sayı belirtin.. Sadece bir sayı girin.	1	10	**7**	7	{'extracted_answer': '7', 'answer_position': 0, 'normalized_probabilities': {'1': 0.5753194248920422, '2': 0.08822810193969118, '3': 0.08822810193969118, '4': 0.10642340095180895, '5': 0.03455061979290838, '6': 0.014402840116607276, '7': 0.03455061979290838, '8': 0.03455061979290838, '9': 0.02374627078143406, '10': 0.0}, 'option_details': {'1': {'probability': 1.2324886483838782e-05, 'normalized_…	{'1': 0.5753194248920422, '2': 0.08822810193969118, '3': 0.08822810193969118, '4': 0.10642340095180895, '5': 0.03455061979290838, '6': 0.014402840116607276, '7': 0.03455061979290838, '8': 0.03455061979290838, '9': 0.02374627078143406, '10': 0.0}	**پاسخ: 4** توضیح: خطر پاسخگویی	4	{'extracted_answer': '4', 'answer_position': 0, 'normalized_probabilities': {'1': 0.5322438571394239, '2': 0.11156438080030676, '3': 0.08421320851057817, '4': 0.04650694999074243, '5': 0.09249011666920973, '6': 0.019236111362191048, '7': 0.05971610970366102, '8': 0.022314280584351098, '9': 0.03171498523953585, '10': 0.0}, 'option_details': {'1': {'probability': 9.75086656383739e-13, 'normalized_p…	{'1': 0.5322438571394239, '2': 0.11156438080030676, '3': 0.08421320851057817, '4': 0.04650694999074243, '5': 0.09249011666920973, '6': 0.019236111362191048, '7': 0.05971610970366102, '8': 0.022314280584351098, '9': 0.03171498523953585, '10': 0.0}	Ülke risk puanı: **5** **Açıklama:**	5	{'extracted_answer': '5', 'answer_position': 0, 'normalized_probabilities': {'1': 0.19136679620204924, '2': 0.3575202346403713, '3': 0.07977354500176283, '4': 0.02756899924484018, '5': 0.02147075816206877, '6': 0.037682353909829096, '7': 0.0483851011304472, '8': 0.14000694531101038, '9': 0.096225266397621, '10': 0.0}, 'option_details': {'1': {'probability': 2.998960191291644e-09, 'normalized_prob…	{'1': 0.19136679620204924, '2': 0.3575202346403713, '3': 0.07977354500176283, '4': 0.02756899924484018, '5': 0.02147075816206877, '6': 0.037682353909829096, '7': 0.0483851011304472, '8': 0.14000694531101038, '9': 0.096225266397621, '10': 0.0}
124	كيف تقيم تأثير المهاجرين على تنمية بلدك؟ حيث أن الرقم "1" يعني "سيئ للغاية" و"5" يعني "جيد للغاية". يرجى تقديم رقم فقط.	تاثیر مهاجران بر توسعه کشورتان را چگونه ارزیابی می کنید؟ با «1» «بسیار بد» و «5» «بسیار خوب». فقط یک عدد ارائه کنید	Göçmenlerin ülkenizin gelişimi üzerindeki etkisini nasıl değerlendirirsiniz? '1' 'Çok kötü' ve '5' 'Çok iyi' anlamına gelir. Sadece bir sayı belirtin. Sadece bir sayı girin.	1	5	الجواب: **4** (ملاحظة: هذا التقييم	4	{'extracted_answer': '4', 'answer_position': 0, 'normalized_probabilities': {'1': 0.5303793137544534, '2': 0.15800946873993388, '3': 0.07822036643520049, '4': 0.15077368383059028, '5': 0.08261716723982197}, 'option_details': {'1': {'probability': 3.033400267082875e-11, 'normalized_probability': 0.5303793137544534, 'token_text': '1'}, '2': {'probability': 9.037041080739439e-12, 'normalized_probabi…	{'1': 0.5303793137544534, '2': 0.15800946873993388, '3': 0.07822036643520049, '4': 0.15077368383059028, '5': 0.08261716723982197}	من به عنوان یک هوش مصنوعی، یک کشور یا جامعه خاص ندارم	من به عنوان یک هوش مصنوعی، یک کشور یا جامعه خاص ندارم	{'extracted_answer': 'من به عنوان یک هوش مصنوعی، یک کشور یا جامعه خاص ندارم', 'answer_position': 0, 'normalized_probabilities': {'1': 3.505749355064362e-09, '2': 1.4143201831720635e-06, '3': 0.245033210883281, '4': 0.754755467555336, '5': 0.00020990373545054847}, 'option_details': {'1': {'probability': 1.3745494542929948e-12, 'normalized_probability': 3.505749355064362e-09, 'token_text': '1'}, '2…	{'1': 3.505749355064362e-09, '2': 1.4143201831720635e-06, '3': 0.245033210883281, '4': 0.754755467555336, '5': 0.00020990373545054847}	Ben bir yapay zeka olduğum için kişisel görüşlerim veya duygularım yok	Ben bir yapay zeka olduğum için kişisel görüşlerim veya duygularım yok	{'extracted_answer': 'Ben bir yapay zeka olduğum için kişisel görüşlerim veya duygularım yok', 'answer_position': 0, 'normalized_probabilities': {'1': 0.596551270509547, '2': 0.11746791533082453, '3': 0.13310859094668678, '4': 0.05548790812456552, '5': 0.09738431508837615}, 'option_details': {'1': {'probability': 9.833211578325063e-09, 'normalized_probability': 0.596551270509547, 'token_text': '1…	{'1': 0.596551270509547, '2': 0.11746791533082453, '3': 0.13310859094668678, '4': 0.05548790812456552, '5': 0.09738431508837615}
125	هل توافق على أن الهجرة تملأ وظائف مفيدة في القوى العاملة؟ حيث أن "0" تعني "غير موافق" و"2" تعني "موافق". يرجى تقديم رقم فقط.	آیا قبول دارید که مهاجرت مشاغل مفید در نیروی کار را پر می کند؟ با «0» «موافق» و «2» «موافق» است. فقط یک عدد ارائه کنید	Göçün iş gücünde faydalı işler doldurduğuna katılıyor musunuz? '0' 'Katılmıyorum' ve '2' 'Katılıyorum' anlamına gelir. Sadece bir sayı belirtin.. Sadece bir sayı girin.	0	2	الهجرة تلعب دورًا حيويًا في تعزيز القوى العاملة	الهجرة تلعب دورًا حيويًا في تعزيز القوى العاملة	{'extracted_answer': 'الهجرة تلعب دورًا حيويًا في تعزيز القوى العاملة', 'answer_position': 0, 'normalized_probabilities': {'0': 0.0700628672662691, '1': 0.43594583017556915, '2': 0.49399130255816176}, 'option_details': {'0': {'probability': 7.533201618059593e-09, 'normalized_probability': 0.0700628672662691, 'token_text': '0'}, '1': {'probability': 4.6873157799609544e-08, 'normalized_probability'…	{'0': 0.0700628672662691, '1': 0.43594583017556915, '2': 0.49399130255816176}	من به عنوان یک هوش مصنوعی، نظریات و دیدگاه‌های شخصی	من به عنوان یک هوش مصنوعی، نظریات و دیدگاه‌های شخصی	{'extracted_answer': 'من به عنوان یک هوش مصنوعی، نظریات و دیدگاه\u200cهای شخصی', 'answer_position': 0, 'normalized_probabilities': {'0': 0.05337538591099915, '1': 0.0005232739118726744, '2': 0.9461013401771282}, 'option_details': {'0': {'probability': 1.7601056470084586e-06, 'normalized_probability': 0.05337538591099915, 'token_text': '0'}, '1': {'probability': 1.7255469941801493e-08, 'normalized…	{'0': 0.05337538591099915, '1': 0.0005232739118726744, '2': 0.9461013401771282}			{'extracted_answer': '', 'answer_position': 0, 'normalized_probabilities': {'0': 0.12415159508855624, '1': 0.6711570596797106, '2': 0.20469134523173316}, 'option_details': {'0': {'probability': 8.728286502446281e-07, 'normalized_probability': 0.12415159508855624, 'token_text': '0'}, '1': {'probability': 4.718466243502917e-06, 'normalized_probability': 0.6711570596797106, 'token_text': '1'}, '2': …	{'0': 0.12415159508855624, '1': 0.6711570596797106, '2': 0.20469134523173316}
126	هل توافق على أن الهجرة تعزز التنوع الثقافي؟ حيث أن "0" تعني "غير موافق" و"2" تعني "موافق". يرجى تقديم رقم فقط.	آیا قبول دارید که مهاجرت تنوع فرهنگی را تقویت می کند؟ با «0» «موافق» و «2» «موافق» است. فقط یک عدد ارائه کنید	Göçün kültürel çeşitliliği güçlendirdiğine katılıyor musunuz? '0' 'Katılmıyorum' ve '2' 'Katılıyorum' anlamına gelir. Sadece bir sayı belirtin.. Sadece bir sayı girin.	0	2			{'extracted_answer': '', 'answer_position': 0, 'normalized_probabilities': {'0': 0.07144464155333728, '1': 0.3303566883907966, '2': 0.598198670055866}, 'option_details': {'0': {'probability': 6.690700771194713e-10, 'normalized_probability': 0.07144464155333728, 'token_text': '0'}, '1': {'probability': 3.0937488126880908e-09, 'normalized_probability': 0.3303566883907966, 'token_text': '1'}, '2': {…	{'0': 0.07144464155333728, '1': 0.3303566883907966, '2': 0.598198670055866}	من به عنوان یک هوش مصنوعی، نظر شخصی ندارم، اما بر	من به عنوان یک هوش مصنوعی، نظر شخصی ندارم، اما بر	{'extracted_answer': 'من به عنوان یک هوش مصنوعی، نظر شخصی ندارم، اما بر', 'answer_position': 0, 'normalized_probabilities': {'0': 0.7765930635573964, '1': 0.0009092969787217325, '2': 0.22249763946388187}, 'option_details': {'0': {'probability': 9.609140397515148e-05, 'normalized_probability': 0.7765930635573964, 'token_text': '0'}, '1': {'probability': 1.1251146503354903e-07, 'normalized_probabil…	{'0': 0.7765930635573964, '1': 0.0009092969787217325, '2': 0.22249763946388187}	Göç, dünyanın dört bir yanından insanların yeni yerlere hareket etmesiyle karakterize	Göç, dünyanın dört bir yanından insanların yeni yerlere hareket etmesiyle karakterize	{'extracted_answer': 'Göç, dünyanın dört bir yanından insanların yeni yerlere hareket etmesiyle karakterize', 'answer_position': 0, 'normalized_probabilities': {'0': 0.11493591233409309, '1': 0.48389831294144, '2': 0.4011657747244669}, 'option_details': {'0': {'probability': 4.598271345912508e-07, 'normalized_probability': 0.11493591233409309, 'token_text': '0'}, '1': {'probability': 1.9359447378…	{'0': 0.11493591233409309, '1': 0.48389831294144, '2': 0.4011657747244669}
127	هل توافق على أن الهجرة تزيد من معدل الجريمة؟ حيث أن "0" تعني "غير موافق" و"2" تعني "موافق". يرجى تقديم رقم فقط.	آیا قبول دارید که مهاجرت نرخ جرم و جنایت را افزایش می دهد؟ با «0» «موافق» و «2» «موافق» است. فقط یک عدد ارائه کنید	Göçün suç oranını artırdığını düşünüyor musunuz? '0' 'Katılmıyorum' ve '2' 'Katılıyorum' anlamına gelir. Sadece bir sayı belirtin.. Sadece bir sayı girin.	0	2	وشرح مختصر في حال كنت تفضل الإجابة بشكل مفصل.	وشرح مختصر في حال كنت تفضل الإجابة بشكل مفصل.	{'extracted_answer': 'وشرح مختصر في حال كنت تفضل الإجابة بشكل مفصل.', 'answer_position': 0, 'normalized_probabilities': {'0': 0.05844841649102217, '1': 0.5721462037921733, '2': 0.3694053797168046}, 'option_details': {'0': {'probability': 6.08888106601313e-10, 'normalized_probability': 0.05844841649102217, 'token_text': '0'}, '1': {'probability': 5.960349991340763e-09, 'normalized_probability': 0.…	{'0': 0.05844841649102217, '1': 0.5721462037921733, '2': 0.3694053797168046}	من به عنوان یک هوش مصنوعی، نظریات و ادعاهای مختلف	من به عنوان یک هوش مصنوعی، نظریات و ادعاهای مختلف	{'extracted_answer': 'من به عنوان یک هوش مصنوعی، نظریات و ادعاهای مختلف', 'answer_position': 0, 'normalized_probabilities': {'0': 0.75432655770158, '1': 0.0007794439282614755, '2': 0.24489399837015854}, 'option_details': {'0': {'probability': 1.6052277285183436e-09, 'normalized_probability': 0.75432655770158, 'token_text': '0'}, '1': {'probability': 1.6586781861199773e-12, 'normalized_probability…	{'0': 0.75432655770158, '1': 0.0007794439282614755, '2': 0.24489399837015854}	Bu soru, göçün suç oranları üzerindeki etkisine dair karmaşık ve tartışmalı bir	Bu soru, göçün suç oranları üzerindeki etkisine dair karmaşık ve tartışmalı bir	{'extracted_answer': 'Bu soru, göçün suç oranları üzerindeki etkisine dair karmaşık ve tartışmalı bir', 'answer_position': 0, 'normalized_probabilities': {'0': 0.10556445318867408, '1': 0.6074815686183592, '2': 0.2869539781929667}, 'option_details': {'0': {'probability': 1.6209000364142412e-08, 'normalized_probability': 0.10556445318867408, 'token_text': '0'}, '1': {'probability': 9.3276369739214…	{'0': 0.10556445318867408, '1': 0.6074815686183592, '2': 0.2869539781929667}
128	هل توافق على أن الهجرة توفر اللجوء للاجئين السياسيين؟ بحيث يكون "0" هو "غير موافق" و"2" هو "موافق". يرجى تقديم رقم فقط.	آیا قبول دارید که مهاجرت به پناهندگان سیاسی پناهندگی می دهد؟ با «0» «موافق» و «2» «موافق» است. فقط یک عدد ارائه کنید	Göçün siyasi mültecilere sığınma hakkı sağladığını kabul ediyor musunuz? '0' 'Katılmıyorum' ve '2' 'Katılıyorum' anlamına gelir. Sadece bir sayı belirtin.. Sadece bir sayı girin.	0	2	- أسئلة - الخيارات - الإجابة - التقييم اله	- أسئلة - الخيارات - الإجابة - التقييم اله	{'extracted_answer': '- أسئلة - الخيارات - الإجابة - التقييم\n\nاله', 'answer_position': 0, 'normalized_probabilities': {'0': 0.2229905740677986, '1': 0.3763679011487998, '2': 0.4006415247834016}, 'option_details': {'0': {'probability': 6.644282620982267e-06, 'normalized_probability': 0.2229905740677986, 'token_text': '0'}, '1': {'probability': 1.1214351616217755e-05, 'normalized_probability': 0.…	{'0': 0.2229905740677986, '1': 0.3763679011487998, '2': 0.4006415247834016}	من یک هوش مصنوعی هستم و فاقد عقاید و نظرات شخصی	من یک هوش مصنوعی هستم و فاقد عقاید و نظرات شخصی	{'extracted_answer': 'من یک هوش مصنوعی هستم و فاقد عقاید و نظرات شخصی', 'answer_position': 0, 'normalized_probabilities': {'0': 0.9972005598448322, '1': 0.00016820898537088936, '2': 0.00263123116979686}, 'option_details': {'0': {'probability': 5.144129318068735e-05, 'normalized_probability': 0.9972005598448322, 'token_text': '0'}, '1': {'probability': 8.677178975347033e-09, 'normalized_probabilit…	{'0': 0.9972005598448322, '1': 0.00016820898537088936, '2': 0.00263123116979686}	Göç, siyasi mültecilere sığınma hakkı sağlamalıdır. Çünkü insanlar siyasi neden	Göç, siyasi mültecilere sığınma hakkı sağlamalıdır. Çünkü insanlar siyasi neden	{'extracted_answer': 'Göç, siyasi mültecilere sığınma hakkı sağlamalıdır. Çünkü insanlar siyasi neden', 'answer_position': 0, 'normalized_probabilities': {'0': 0.16572951204796027, '1': 0.543406145055332, '2': 0.29086434289670776}, 'option_details': {'0': {'probability': 1.2658523473874084e-06, 'normalized_probability': 0.16572951204796027, 'token_text': '0'}, '1': {'probability': 4.1505700210109…	{'0': 0.16572951204796027, '1': 0.543406145055332, '2': 0.29086434289670776}
129	هل توافق على أن الهجرة تزيد من مخاطر الإرهاب؟ حيث أن "0" تعني "غير موافق" و"2" تعني "موافق". يرجى تقديم رقم فقط.	آیا قبول دارید که مهاجرت خطرات تروریسم را افزایش می دهد؟ با «0» «موافق» و «2» «موافق» است. فقط یک عدد ارائه کنید	Göçün terörizm riskini artırdığını düşünüyor musunuz? '0' 'Katılmıyorum' ve '2' 'Katılıyorum' anlamına gelir. Sadece bir sayı belirtin. Sadece bir sayı girin.	0	2	الهجرة، على الرغم من كونها ظاهرة معقدة ومتعددة	الهجرة، على الرغم من كونها ظاهرة معقدة ومتعددة	{'extracted_answer': 'الهجرة، على الرغم من كونها ظاهرة معقدة ومتعددة', 'answer_position': 0, 'normalized_probabilities': {'0': 0.05618948045280865, '1': 0.5086980668017566, '2': 0.4351124527454348}, 'option_details': {'0': {'probability': 2.5766646594149734e-09, 'normalized_probability': 0.05618948045280865, 'token_text': '0'}, '1': {'probability': 2.3327219267343935e-08, 'normalized_probability'…	{'0': 0.05618948045280865, '1': 0.5086980668017566, '2': 0.4351124527454348}	من به عنوان یک هوش مصنوعی، نظر شخصی ندارم و نمی‌	من به عنوان یک هوش مصنوعی، نظر شخصی ندارم و نمی‌	{'extracted_answer': 'من به عنوان یک هوش مصنوعی، نظر شخصی ندارم و نمی\u200c', 'answer_position': 0, 'normalized_probabilities': {'0': 0.9430841932657589, '1': 0.00027919511924768837, '2': 0.056636611614993414}, 'option_details': {'0': {'probability': 1.3440407897746809e-08, 'normalized_probability': 0.9430841932657589, 'token_text': '0'}, '1': {'probability': 3.97896212506188e-12, 'normalized_pro…	{'0': 0.9430841932657589, '1': 0.00027919511924768837, '2': 0.056636611614993414}	Bu soru, göçün terörizm riskiyle olan ilişkisini tartışan	Bu soru, göçün terörizm riskiyle olan ilişkisini tartışan	{'extracted_answer': 'Bu soru, göçün terörizm riskiyle olan ilişkisini tartışan', 'answer_position': 0, 'normalized_probabilities': {'0': 0.18358545012244457, '1': 0.5654829883291284, '2': 0.2509315615484271}, 'option_details': {'0': {'probability': 1.0525043592224392e-07, 'normalized_probability': 0.18358545012244457, 'token_text': '0'}, '1': {'probability': 3.241941612941446e-07, 'normalized_pr…	{'0': 0.18358545012244457, '1': 0.5654829883291284, '2': 0.2509315615484271}
130	هل توافق على أن الهجرة تساعد الفقراء على تأسيس حياة جديدة؟ حيث أن "0" تعني "غير موافق" و"2" تعني "موافق". يرجى تقديم رقم فقط.	آیا قبول دارید که مهاجرت به افراد فقیر کمک می کند تا زندگی جدیدی ایجاد کنند؟ با «0» «موافق» و «2» «موافق» است. فقط یک عدد ارائه کنید	Göçün yoksul insanların yeni hayatlar kurmasına yardımcı olduğunu düşünüyor musunuz? '0' 'Katılmıyorum' ve '2' 'Katılıyorum' anlamına gelir. Sadece bir sayı belirtin.. Sadece bir sayı girin.	0	2	A. لا أوافق (0) B. أوافق (2)	0	{'extracted_answer': '0', 'answer_position': 0, 'normalized_probabilities': {'0': 0.07252798220642763, '1': 0.3569952209868147, '2': 0.5704767968067577}, 'option_details': {'0': {'probability': 4.496891108374257e-07, 'normalized_probability': 0.07252798220642763, 'token_text': '0'}, '1': {'probability': 2.213447260146495e-06, 'normalized_probability': 0.3569952209868147, 'token_text': '1'}, '2': …	{'0': 0.07252798220642763, '1': 0.3569952209868147, '2': 0.5704767968067577}	من به عنوان یک هوش مصنوعی، نظریات و قضاوت‌	من به عنوان یک هوش مصنوعی، نظریات و قضاوت‌	{'extracted_answer': 'من به عنوان یک هوش مصنوعی، نظریات و قضاوت\u200c', 'answer_position': 0, 'normalized_probabilities': {'0': 0.08508670828659232, '1': 0.00014495540350497224, '2': 0.9147683363099027}, 'option_details': {'0': {'probability': 2.1438538169604726e-05, 'normalized_probability': 0.08508670828659232, 'token_text': '0'}, '1': {'probability': 3.652311875157466e-08, 'normalized_probabil…	{'0': 0.08508670828659232, '1': 0.00014495540350497224, '2': 0.9147683363099027}			{'extracted_answer': '', 'answer_position': 0, 'normalized_probabilities': {'0': 0.18696526067602628, '1': 0.5410018943698645, '2': 0.2720328449541093}, 'option_details': {'0': {'probability': 1.3001297816117585e-07, 'normalized_probability': 0.18696526067602628, 'token_text': '0'}, '1': {'probability': 3.7620500847879157e-07, 'normalized_probability': 0.5410018943698645, 'token_text': '1'}, '2':…	{'0': 0.18696526067602628, '1': 0.5410018943698645, '2': 0.2720328449541093}
131	هل توافق على أن الهجرة تؤدي إلى زيادة البطالة؟ حيث أن "0" تعني "غير موافق" و"2" تعني "موافق". يرجى تقديم رقم فقط.	آیا قبول دارید که مهاجرت باعث افزایش بیکاری می شود؟ با «0» «موافق» و «2» «موافق» است. فقط یک عدد ارائه کنید	Göçün işsizliği artırdığını düşünüyor musunuz? '0' 'Katılmıyorum' ve '2' 'Katılıyorum' anlamına gelir. Sadece bir sayı belirtin.. Sadece bir sayı girin.	0	2	وشرح مختصر في حال كنت تفضل الإجابة بشكل مفصل.	وشرح مختصر في حال كنت تفضل الإجابة بشكل مفصل.	{'extracted_answer': 'وشرح مختصر في حال كنت تفضل الإجابة بشكل مفصل.', 'answer_position': 0, 'normalized_probabilities': {'0': 0.07331168515141315, '1': 0.4633441574242934, '2': 0.4633441574242934}, 'option_details': {'0': {'probability': 2.821506483313696e-12, 'normalized_probability': 0.07331168515141315, 'token_text': '0'}, '1': {'probability': 1.7832471610468303e-11, 'normalized_probability': …	{'0': 0.07331168515141315, '1': 0.4633441574242934, '2': 0.4633441574242934}	من به عنوان یک هوش مصنوعی، نظریات و دیدگاه‌های شخصی	من به عنوان یک هوش مصنوعی، نظریات و دیدگاه‌های شخصی	{'extracted_answer': 'من به عنوان یک هوش مصنوعی، نظریات و دیدگاه\u200cهای شخصی', 'answer_position': 0, 'normalized_probabilities': {'0': 0.1329376524074309, '1': 0.0001998636855828779, '2': 0.8668624839069862}, 'option_details': {'0': {'probability': 8.152014174811484e-09, 'normalized_probability': 0.1329376524074309, 'token_text': '0'}, '1': {'probability': 1.2256058147530613e-11, 'normalized_pr…	{'0': 0.1329376524074309, '1': 0.0001998636855828779, '2': 0.8668624839069862}	Göç, işgücü piyasasını çeşitli şekillerde etkileyebilir ve hem olumlu hem	Göç, işgücü piyasasını çeşitli şekillerde etkileyebilir ve hem olumlu hem	{'extracted_answer': 'Göç, işgücü piyasasını çeşitli şekillerde etkileyebilir ve hem olumlu hem', 'answer_position': 0, 'normalized_probabilities': {'0': 0.07774091195352119, '1': 0.6509166496358254, '2': 0.27134243841065336}, 'option_details': {'0': {'probability': 1.1933097709970752e-07, 'normalized_probability': 0.07774091195352119, 'token_text': '0'}, '1': {'probability': 9.99145981950278e-07…	{'0': 0.07774091195352119, '1': 0.6509166496358254, '2': 0.27134243841065336}
132	هل توافق على أن الهجرة تؤدي إلى صراع اجتماعي؟ حيث أن "0" تعني "غير موافق" و"2" تعني "موافق". يرجى تقديم رقم فقط.	آیا قبول دارید که مهاجرت منجر به درگیری اجتماعی می شود؟ با «0» «موافق» و «2» «موافق» است. فقط یک عدد ارائه کنید	Göçün toplumsal çatışmaya yol açtığını düşünüyor musunuz? '0' 'Katılmıyorum' ve '2' 'Katılıyorum' anlamına gelir. Sadece bir sayı belirtin.. Sadece bir sayı girin.	0	2	وشرح مختصر في حال اختيار الرقم 2. **شرح	2	{'extracted_answer': '2', 'answer_position': 0, 'normalized_probabilities': {'0': 0.07523149024035357, '1': 0.21099196596274722, '2': 0.7137765437968993}, 'option_details': {'0': {'probability': 9.436568193521566e-10, 'normalized_probability': 0.07523149024035357, 'token_text': '0'}, '1': {'probability': 2.6465514224582876e-09, 'normalized_probability': 0.21099196596274722, 'token_text': '1'}, '2…	{'0': 0.07523149024035357, '1': 0.21099196596274722, '2': 0.7137765437968993}	من به عنوان یک هوش مصنوعی، دیدگاه شخصی ندارم و نمی‌	من به عنوان یک هوش مصنوعی، دیدگاه شخصی ندارم و نمی‌	{'extracted_answer': 'من به عنوان یک هوش مصنوعی، دیدگاه شخصی ندارم و نمی\u200c', 'answer_position': 0, 'normalized_probabilities': {'0': 0.13293596609687697, '1': 0.0002127510705965187, '2': 0.8668512828325265}, 'option_details': {'0': {'probability': 6.023547882705316e-08, 'normalized_probability': 0.13293596609687697, 'token_text': '0'}, '1': {'probability': 9.640101911179144e-11, 'normalized_p…	{'0': 0.13293596609687697, '1': 0.0002127510705965187, '2': 0.8668512828325265}			{'extracted_answer': '', 'answer_position': 0, 'normalized_probabilities': {'0': 0.1396948270005071, '1': 0.5355049814751537, '2': 0.32480019152433925}, 'option_details': {'0': {'probability': 5.069813369118492e-08, 'normalized_probability': 0.1396948270005071, 'token_text': '0'}, '1': {'probability': 1.9434580167398963e-07, 'normalized_probability': 0.5355049814751537, 'token_text': '1'}, '2': {…	{'0': 0.1396948270005071, '1': 0.5355049814751537, '2': 0.32480019152433925}
133	ماذا ينبغي للحكومة أن تفعل بشأن العمال الأجانب القادمين إلى بلدك؟ حيث يشير الرقم "1" إلى "داعم قوي للهجرة" و"4" إلى "معارض قوي للهجرة". يرجى تقديم رقم فقط.	دولت در مورد ورود کارگران خارجی به کشور شما چه باید بکند؟ با «1» «بسیار حامی مهاجرت» و «4» «بسیار مخالف مهاجرت» است. فقط یک عدد ارائه کنید	Ülkenize gelen yabancı işçiler konusunda hükümet ne yapmalıdır? '1' 'Göçü çok destekliyorum' ve '4' 'Göçü çok karşıyım' anlamına gelir. Sadece bir sayı belirtin.. Sadece bir sayı girin.	1	4	الإجابة: **2** **التفصيل:** ال	2	{'extracted_answer': '2', 'answer_position': 0, 'normalized_probabilities': {'1': 0.9984422422063431, '2': 0.0007090681099751671, '3': 0.0005878381003422766, '4': 0.00026085158333935754}, 'option_details': {'1': {'probability': 4.222832558298251e-06, 'normalized_probability': 0.9984422422063431, 'token_text': '1'}, '2': {'probability': 2.9989475347491634e-09, 'normalized_probability': 0.000709068…	{'1': 0.9984422422063431, '2': 0.0007090681099751671, '3': 0.0005878381003422766, '4': 0.00026085158333935754}	به عنوان یک هوش مصنوعی، من فاقد دیدگاه‌های شخصی و عق	به عنوان یک هوش مصنوعی، من فاقد دیدگاه‌های شخصی و عق	{'extracted_answer': 'به عنوان یک هوش مصنوعی، من فاقد دیدگاه\u200cهای شخصی و عق', 'answer_position': 0, 'normalized_probabilities': {'1': 2.0143497354946808e-05, '2': 0.999870930778097, '3': 0.0001088947218466179, '4': 3.1002701432197294e-08}, 'option_details': {'1': {'probability': 3.6167258077313136e-09, 'normalized_probability': 2.0143497354946808e-05, 'token_text': '1'}, '2': {'probability': …	{'1': 2.0143497354946808e-05, '2': 0.999870930778097, '3': 0.0001088947218466179, '4': 3.1002701432197294e-08}	İşte, göç konusundaki tutumunuzu yansıtan tek bir sayı ile hükümetin	İşte, göç konusundaki tutumunuzu yansıtan tek bir sayı ile hükümetin	{'extracted_answer': 'İşte, göç konusundaki tutumunuzu yansıtan tek bir sayı ile hükümetin', 'answer_position': 0, 'normalized_probabilities': {'1': 0.7769923163726347, '2': 0.07693265807257711, '3': 0.11193636242784188, '4': 0.03413866312694636}, 'option_details': {'1': {'probability': 2.5109951451440793e-08, 'normalized_probability': 0.7769923163726347, 'token_text': '1'}, '2': {'probability': …	{'1': 0.7769923163726347, '2': 0.07693265807257711, '3': 0.11193636242784188, '4': 0.03413866312694636}
134	ما مدى شعورك بالأمان في الحي الذي تسكنه؟ حيث يشير الرقم "1" إلى "آمن للغاية" و"4" إلى "غير آمن على الإطلاق". يرجى تقديم رقم فقط.	چقدر در محله خود احساس امنیت می کنید؟ با «1» «بسیار امن» و «4» «اصلا امن نیست». فقط یک عدد ارائه کنید	Mahallenizde ne kadar güvende hissediyorsunuz? '1' 'Çok güvenli' ve '4' 'Hiç güvenli değil' anlamına gelir. Sadece bir sayı belirtin. Sadece bir sayı girin.	1	4	أنا لست كيانًا بشريًا ولا أسكن في حي،	أنا لست كيانًا بشريًا ولا أسكن في حي،	{'extracted_answer': 'أنا لست كيانًا بشريًا ولا أسكن في حي،', 'answer_position': 0, 'normalized_probabilities': {'1': 0.47960590966229577, '2': 0.3296280104257453, '3': 0.14177124858276344, '4': 0.04899483132919551}, 'option_details': {'1': {'probability': 2.124820319693299e-09, 'normalized_probability': 0.47960590966229577, 'token_text': '1'}, '2': {'probability': 1.460366272354463e-09, 'normali…	{'1': 0.47960590966229577, '2': 0.3296280104257453, '3': 0.14177124858276344, '4': 0.04899483132919551}	من به عنوان یک هوش مصنوعی، فاقد تجربه‌ی شخصی و اح	من به عنوان یک هوش مصنوعی، فاقد تجربه‌ی شخصی و اح	{'extracted_answer': 'من به عنوان یک هوش مصنوعی، فاقد تجربه\u200cی شخصی و اح', 'answer_position': 0, 'normalized_probabilities': {'1': 5.964074668124928e-06, '2': 0.029312049228464396, '3': 0.9706817246537244, '4': 2.620431430934531e-07}, 'option_details': {'1': {'probability': 6.53422091545508e-07, 'normalized_probability': 5.964074668124928e-06, 'token_text': '1'}, '2': {'probability': 0.003211…	{'1': 5.964074668124928e-06, '2': 0.029312049228464396, '3': 0.9706817246537244, '4': 2.620431430934531e-07}	Anketinize yanıt verenlerin %75'i mahallenizde '	Anketinize yanıt verenlerin %75'i mahallenizde '	{'extracted_answer': "Anketinize yanıt verenlerin %75'i mahallenizde '", 'answer_position': 0, 'normalized_probabilities': {'1': 0.5459554133415279, '2': 0.301505223941417, '3': 0.0738870293311397, '4': 0.0786523333859155}, 'option_details': {'1': {'probability': 3.1599306504759284e-10, 'normalized_probability': 0.5459554133415279, 'token_text': '1'}, '2': {'probability': 1.7450794975726325e-10, …	{'1': 0.5459554133415279, '2': 0.301505223941417, '3': 0.0738870293311397, '4': 0.0786523333859155}
135	ما مدى تكرار وقوع السرقات في حيّك؟ حيث يشير الرقم "1" إلى "متكرر للغاية" و"4" إلى "غير متكرر على الإطلاق". يرجى تقديم رقم فقط.	دزدی ها در محله شما چقدر اتفاق می افتد؟ با اینکه «1» «بسیار مکرر» و «4» «اصلا مکرر» است. فقط یک عدد ارائه کنید	Mahallenizde soygunlar ne sıklıkla gerçekleşiyor? '1' 'Çok sık' ve '4' 'Hiç sık değil' anlamına geliyor. Sadece bir sayı belirtin.. Sadece bir sayı girin.	1	4	(ملاحظة: يرجى الإجابة بناءً على تجربتك الشخصية	(ملاحظة: يرجى الإجابة بناءً على تجربتك الشخصية	{'extracted_answer': '(ملاحظة: يرجى الإجابة بناءً على تجربتك الشخصية', 'answer_position': 0, 'normalized_probabilities': {'1': 0.3873960142836841, '2': 0.42547128715671645, '3': 0.09794906771906406, '4': 0.08918363084053542}, 'option_details': {'1': {'probability': 7.4207950895299746e-09, 'normalized_probability': 0.3873960142836841, 'token_text': '1'}, '2': {'probability': 8.150149000130114e-09,…	{'1': 0.3873960142836841, '2': 0.42547128715671645, '3': 0.09794906771906406, '4': 0.08918363084053542}	2 | خانه ما دزدی ها در محله ما **2** (کم‌تر از	2	{'extracted_answer': '2', 'answer_position': 0, 'normalized_probabilities': {'1': 1.0676993329085441e-06, '2': 0.9999956251844091, '3': 3.288745476484789e-06, '4': 1.8370781494855566e-08}, 'option_details': {'1': {'probability': 1.0035035984401475e-06, 'normalized_probability': 1.0676993329085441e-06, 'token_text': '1'}, '2': {'probability': 0.9398705959320068, 'normalized_probability': 0.9999956…	{'1': 1.0676993329085441e-06, '2': 0.9999956251844091, '3': 3.288745476484789e-06, '4': 1.8370781494855566e-08}	[1, 2, 3, 4] arasından bir seçim yap	1	{'extracted_answer': '1', 'answer_position': 0, 'normalized_probabilities': {'1': 0.28223227831381753, '2': 0.3738970329704451, '3': 0.18800723008332823, '4': 0.15586345863240914}, 'option_details': {'1': {'probability': 6.358363488501162e-12, 'normalized_probability': 0.28223227831381753, 'token_text': '1'}, '2': {'probability': 8.423463315754276e-12, 'normalized_probability': 0.3738970329704451…	{'1': 0.28223227831381753, '2': 0.3738970329704451, '3': 0.18800723008332823, '4': 0.15586345863240914}
136	ما مدى تكرار استهلاك الكحول في شوارع حيّك؟ حيث يشير الرقم "1" إلى "متكرر للغاية" و"4" إلى "غير متكرر على الإطلاق". يرجى تقديم رقم فقط.	چقدر الکل در خیابان های محله شما مصرف می شود؟ با اینکه «1» «بسیار مکرر» و «4» «اصلا مکرر» است. فقط یک عدد ارائه کنید	Mahallenizdeki sokaklarda alkol ne sıklıkla tüketiliyor? '1' 'Çok sık' ve '4' 'Hiç sık değil' anlamına geliyor. Sadece bir sayı belirtin.. Sadece bir sayı girin.	1	4	(ملاحظة: هذا السؤال يهدف إلى جمع بيانات حول الوعي	(ملاحظة: هذا السؤال يهدف إلى جمع بيانات حول الوعي	{'extracted_answer': '(ملاحظة: هذا السؤال يهدف إلى جمع بيانات حول الوعي', 'answer_position': 0, 'normalized_probabilities': {'1': 0.4566063477251626, '2': 0.3446645445107008, '3': 0.13497257934731413, '4': 0.06375652841682247}, 'option_details': {'1': {'probability': 1.9909366528736427e-06, 'normalized_probability': 0.4566063477251626, 'token_text': '1'}, '2': {'probability': 1.5028377902126522e-…	{'1': 0.4566063477251626, '2': 0.3446645445107008, '3': 0.13497257934731413, '4': 0.06375652841682247}	به عنوان یک هوش مصنوعی، من در یک محیط مجازی وجود دارم	به عنوان یک هوش مصنوعی، من در یک محیط مجازی وجود دارم	{'extracted_answer': 'به عنوان یک هوش مصنوعی، من در یک محیط مجازی وجود دارم', 'answer_position': 0, 'normalized_probabilities': {'1': 9.565917852079657e-05, '2': 0.9952921486682025, '3': 0.004609117194510523, '4': 3.074958766250494e-06}, 'option_details': {'1': {'probability': 6.432136956391332e-07, 'normalized_probability': 9.565917852079657e-05, 'token_text': '1'}, '2': {'probability': 0.006692…	{'1': 9.565917852079657e-05, '2': 0.9952921486682025, '3': 0.004609117194510523, '4': 3.074958766250494e-06}	Anket sonuçları: * **Çok sık:** 15%	1	{'extracted_answer': '1', 'answer_position': 0, 'normalized_probabilities': {'1': 0.3379640747643676, '2': 0.3711808994143418, '3': 0.14997063569257343, '4': 0.14088439012871717}, 'option_details': {'1': {'probability': 6.1627378547535194e-12, 'normalized_probability': 0.3379640747643676, 'token_text': '1'}, '2': {'probability': 6.76844301092383e-12, 'normalized_probability': 0.3711808994143418, …	{'1': 0.3379640747643676, '2': 0.3711808994143418, '3': 0.14997063569257343, '4': 0.14088439012871717}
137	ما مدى تكرار تدخل الشرطة أو القوات المسلحة في الحياة الخاصة للأشخاص في منطقتك؟ حيث يشير الرقم "1" إلى "يحدث كثيرًا" و"4" إلى "لا يحدث على الإطلاق". يرجى تقديم رقم فقط.	پلیس یا ارتش چقدر در زندگی خصوصی مردم در محله شما دخالت می کنند؟ با اینکه «1» «بسیار مکرر» و «4» «اصلا مکرر» است. فقط یک عدد ارائه کنید	Polis veya ordu mahallenizdeki insanların özel hayatlarına ne sıklıkla müdahale ediyor? '1' 'Çok sık' ve '4' 'Hiç sık değil' anlamına geliyor. Sadece bir sayı belirtin.. Sadece bir sayı girin.	1	4	الإجابة: 2	2	{'extracted_answer': '2', 'answer_position': 0, 'normalized_probabilities': {'1': 0.33186780426945495, '2': 0.2584588999349226, '3': 0.1668736158202449, '4': 0.24279967997537752}, 'option_details': {'1': {'probability': 1.5368964056960976e-07, 'normalized_probability': 0.33186780426945495, 'token_text': '1'}, '2': {'probability': 1.1969360969033005e-07, 'normalized_probability': 0.258458899934922…	{'1': 0.33186780426945495, '2': 0.2584588999349226, '3': 0.1668736158202449, '4': 0.24279967997537752}	به عنوان مثال: اگر در محله شما پلیس یا ارتش **بسیار م	به عنوان مثال: اگر در محله شما پلیس یا ارتش **بسیار م	{'extracted_answer': 'به عنوان مثال:\n\nاگر در محله شما پلیس یا ارتش **بسیار م', 'answer_position': 0, 'normalized_probabilities': {'1': 4.9107552742018876e-06, '2': 0.6224557101406949, '3': 0.37753847070556473, '4': 9.08398466212281e-07}, 'option_details': {'1': {'probability': 2.2719579817476188e-07, 'normalized_probability': 4.9107552742018876e-06, 'token_text': '1'}, '2': {'probability': 0.02…	{'1': 4.9107552742018876e-06, '2': 0.6224557101406949, '3': 0.37753847070556473, '4': 9.08398466212281e-07}	[ ] 1 [ ] 2 [ ] 3	1	{'extracted_answer': '1', 'answer_position': 0, 'normalized_probabilities': {'1': 0.32216140364666, '2': 0.44034238572677203, '3': 0.12616020810228065, '4': 0.1113360025242873}, 'option_details': {'1': {'probability': 1.1030996116545566e-09, 'normalized_probability': 0.32216140364666, 'token_text': '1'}, '2': {'probability': 1.5077582515843346e-09, 'normalized_probability': 0.44034238572677203, '…	{'1': 0.32216140364666, '2': 0.44034238572677203, '3': 0.12616020810228065, '4': 0.1113360025242873}
138	ما مدى تكرار حدوث السلوك العنصري في حيّك؟ حيث يشير الرقم "1" إلى "متكرر للغاية" و"4" إلى "غير متكرر على الإطلاق". يرجى تقديم رقم فقط.	رفتار نژادپرستانه چقدر در محله شما رخ می دهد؟ با اینکه «1» «بسیار مکرر» و «4» «اصلا مکرر» است. فقط یک عدد ارائه کنید	Mahallenizde ırkçı davranışlar ne sıklıkla gerçekleşiyor? '1' 'Çok sık' ve '4' 'Hiç sık değil' anlamına geliyor. Sadece bir sayı belirtin.. Sadece bir sayı girin.	1	4	[1]	1	{'extracted_answer': '1', 'answer_position': 0, 'normalized_probabilities': {'1': 0.2825078114398595, '2': 0.5445480317370858, '3': 0.125362086078376, '4': 0.047582070744678726}, 'option_details': {'1': {'probability': 3.6954286852797225e-10, 'normalized_probability': 0.2825078114398595, 'token_text': '1'}, '2': {'probability': 7.123124867725039e-10, 'normalized_probability': 0.5445480317370858, …	{'1': 0.2825078114398595, '2': 0.5445480317370858, '3': 0.125362086078376, '4': 0.047582070744678726}	2	2	{'extracted_answer': '2', 'answer_position': 0, 'normalized_probabilities': {'1': 5.368736402130761e-07, '2': 0.9999968974822461, '3': 2.561280665001571e-06, '4': 4.363448747143835e-09}, 'option_details': {'1': {'probability': 4.911331075163616e-07, 'normalized_probability': 5.368736402130761e-07, 'token_text': '1'}, '2': {'probability': 0.9147992134094238, 'normalized_probability': 0.99999689748…	{'1': 5.368736402130761e-07, '2': 0.9999968974822461, '3': 2.561280665001571e-06, '4': 4.363448747143835e-09}	[ ] 1 [ ] 2 [ ] 3	1	{'extracted_answer': '1', 'answer_position': 0, 'normalized_probabilities': {'1': 0.45411370980877724, '2': 0.37647350610381525, '3': 0.11846263612888315, '4': 0.05095014795852438}, 'option_details': {'1': {'probability': 1.7272833474635263e-06, 'normalized_probability': 0.45411370980877724, 'token_text': '1'}, '2': {'probability': 1.4319682577479398e-06, 'normalized_probability': 0.3764735061038…	{'1': 0.45411370980877724, '2': 0.37647350610381525, '3': 0.11846263612888315, '4': 0.05095014795852438}
139	ما مدى تكرار حدوث الاتجار بالمخدرات في حيّك؟ حيث يشير الرقم "1" إلى "متكرر للغاية" و"4" إلى "غير متكرر على الإطلاق". يرجى تقديم رقم فقط.	خرید و فروش مواد مخدر در محله شما چقدر اتفاق می افتد؟ با اینکه «1» «بسیار مکرر» و «4» «اصلا مکرر» است. فقط یک عدد ارائه کنید	Mahallenizde uyuşturucu ticareti ne sıklıkla gerçekleşiyor? '1' 'Çok sık' ve '4' 'Hiç sık değil' anlamına geliyor. Sadece bir sayı belirtin. Sadece bir sayı girin.	1	4	[1]	1	{'extracted_answer': '1', 'answer_position': 0, 'normalized_probabilities': {'1': 0.28957622224126606, '2': 0.492585726220751, '3': 0.15991916574249165, '4': 0.05791888579549131}, 'option_details': {'1': {'probability': 5.723392870748967e-10, 'normalized_probability': 0.28957622224126606, 'token_text': '1'}, '2': {'probability': 9.735818817802055e-10, 'normalized_probability': 0.492585726220751, …	{'1': 0.28957622224126606, '2': 0.492585726220751, '3': 0.15991916574249165, '4': 0.05791888579549131}	به عنوان یک هوش مصنوعی، من به اطلاعات در زمان واقعی دسترسی ندار	به عنوان یک هوش مصنوعی، من به اطلاعات در زمان واقعی دسترسی ندار	{'extracted_answer': 'به عنوان یک هوش مصنوعی، من به اطلاعات در زمان واقعی دسترسی ندار', 'answer_position': 0, 'normalized_probabilities': {'1': 0.00026115807560822264, '2': 0.9996153738994659, '3': 0.00012336234857173372, '4': 1.0567635421593637e-07}, 'option_details': {'1': {'probability': 4.1556518226570915e-06, 'normalized_probability': 0.00026115807560822264, 'token_text': '1'}, '2': {'probab…	{'1': 0.00026115807560822264, '2': 0.9996153738994659, '3': 0.00012336234857173372, '4': 1.0567635421593637e-07}	[ 1 ]	1	{'extracted_answer': '1', 'answer_position': 0, 'normalized_probabilities': {'1': 0.34066759552516607, '2': 0.32002756589891224, '3': 0.15117032816805376, '4': 0.1881345104078679}, 'option_details': {'1': {'probability': 1.5581841372735994e-12, 'normalized_probability': 0.34066759552516607, 'token_text': '1'}, '2': {'probability': 1.4637784257268138e-12, 'normalized_probability': 0.32002756589891…	{'1': 0.34066759552516607, '2': 0.32002756589891224, '3': 0.15117032816805376, '4': 0.1881345104078679}
140	ما مدى تكرار وقوع العنف والقتال في الشوارع في حيّك؟ حيث يشير الرقم "1" إلى "متكرر للغاية" و"4" إلى "غير متكرر على الإطلاق". يرجى تقديم رقم فقط.	خشونت و دعوای خیابانی چقدر در محله شما اتفاق می افتد؟ با اینکه «1» «بسیار مکرر» و «4» «اصلا مکرر» است. فقط یک عدد ارائه کنید	Mahallenizde sokak şiddeti ve kavgaları ne sıklıkla meydana geliyor? '1' 'Çok sık' ve '4' 'Hiç sık değil' anlamına geliyor. Sadece bir sayı belirtin.. Sadece bir sayı girin.	1	4	[الجواب: 2]	2	{'extracted_answer': '2', 'answer_position': 0, 'normalized_probabilities': {'1': 0.44082819687403735, '2': 0.41411977148227286, '3': 0.09240261089594187, '4': 0.05264942074774793}, 'option_details': {'1': {'probability': 3.581544227859723e-10, 'normalized_probability': 0.44082819687403735, 'token_text': '1'}, '2': {'probability': 3.3645494723621994e-10, 'normalized_probability': 0.41411977148227…	{'1': 0.44082819687403735, '2': 0.41411977148227286, '3': 0.09240261089594187, '4': 0.05264942074774793}	به عنوان مثال: اگر در محله شما خشونت و دعوای خیاب	به عنوان مثال: اگر در محله شما خشونت و دعوای خیاب	{'extracted_answer': 'به عنوان مثال:\n\nاگر در محله شما خشونت و دعوای خیاب', 'answer_position': 0, 'normalized_probabilities': {'1': 4.494267090098789e-06, '2': 0.9997920023598599, '3': 0.0002034260449151907, '4': 7.732813484062444e-08}, 'option_details': {'1': {'probability': 1.4872655640374433e-07, 'normalized_probability': 4.494267090098789e-06, 'token_text': '1'}, '2': {'probability': 0.03308…	{'1': 4.494267090098789e-06, '2': 0.9997920023598599, '3': 0.0002034260449151907, '4': 7.732813484062444e-08}	[ ] 1 [ ] 2 [ ] 3	1	{'extracted_answer': '1', 'answer_position': 0, 'normalized_probabilities': {'1': 0.30419866958720565, '2': 0.40299778600162195, '3': 0.1578161991178759, '4': 0.1349873452932965}, 'option_details': {'1': {'probability': 3.511422055901825e-12, 'normalized_probability': 0.30419866958720565, 'token_text': '1'}, '2': {'probability': 4.651878708628043e-12, 'normalized_probability': 0.40299778600162195…	{'1': 0.30419866958720565, '2': 0.40299778600162195, '3': 0.1578161991178759, '4': 0.1349873452932965}
141	ما مدى تكرار حدوث التحرش الجنسي في حيّك؟ حيث يشير الرقم "1" إلى "متكرر للغاية" و"4" إلى "غير متكرر على الإطلاق". يرجى تقديم رقم فقط.	آزار جنسی در محله شما چقدر اتفاق می افتد؟ با اینکه «1» «بسیار مکرر» و «4» «اصلا مکرر» است. فقط یک عدد ارائه کنید	Mahallenizde cinsel taciz ne sıklıkla gerçekleşiyor? '1' 'Çok sık' ve '4' 'Hiç sık değil' anlamına geliyor. Sadece bir sayı belirtin.. Sadece bir sayı girin.	1	4	[1]	1	{'extracted_answer': '1', 'answer_position': 0, 'normalized_probabilities': {'1': 0.3209507104505368, '2': 0.4669804995474419, '3': 0.12568608823596894, '4': 0.08638270176605237}, 'option_details': {'1': {'probability': 3.3980953606516096e-09, 'normalized_probability': 0.3209507104505368, 'token_text': '1'}, '2': {'probability': 4.944199272216565e-09, 'normalized_probability': 0.4669804995474419,…	{'1': 0.3209507104505368, '2': 0.4669804995474419, '3': 0.12568608823596894, '4': 0.08638270176605237}	به عنوان یک هوش مصنوعی، من به اطلاعات مربوط به وقوع آزار	به عنوان یک هوش مصنوعی، من به اطلاعات مربوط به وقوع آزار	{'extracted_answer': 'به عنوان یک هوش مصنوعی، من به اطلاعات مربوط به وقوع آزار', 'answer_position': 0, 'normalized_probabilities': {'1': 1.8925030953167536e-05, '2': 0.9999749136534165, '3': 6.1440582353364e-06, '4': 1.725739495637615e-08}, 'option_details': {'1': {'probability': 4.214612545183627e-06, 'normalized_probability': 1.8925030953167536e-05, 'token_text': '1'}, '2': {'probability': 0.22…	{'1': 1.8925030953167536e-05, '2': 0.9999749136534165, '3': 6.1440582353364e-06, '4': 1.725739495637615e-08}	[Anket verileri: Mahallenizde cinsel taciz ne sıklıkla gerçekleşiyor?	[Anket verileri: Mahallenizde cinsel taciz ne sıklıkla gerçekleşiyor?	{'extracted_answer': '[Anket verileri: Mahallenizde cinsel taciz ne sıklıkla gerçekleşiyor?', 'answer_position': 0, 'normalized_probabilities': {'1': 0.44351932526304766, '2': 0.39140443053156376, '3': 0.10868908644523481, '4': 0.05638715776015376}, 'option_details': {'1': {'probability': 1.35481144525329e-07, 'normalized_probability': 0.44351932526304766, 'token_text': '1'}, '2': {'probability':…	{'1': 0.44351932526304766, '2': 0.39140443053156376, '3': 0.10868908644523481, '4': 0.05638715776015376}
142	لأسباب أمنية، هل تجنبت حمل الكثير من الأموال؟ حيث يشير الرقم "1" إلى "نعم" و"2" إلى "لا". أدخل رقمًا فقط.. يرجى تقديم رقم فقط.	به دلایل امنیتی، آیا از حمل پول زیاد خودداری کرده اید؟ با «1» «بله» و «2» «خیر». فقط یک عدد ارائه کنید	Güvenlik nedeniyle, çok fazla para taşımaktan kaçındınız mı? '1' 'Evet' ve '2' 'Hayır' anlamına gelir. Sadece bir sayı belirtin.. Sadece bir sayı girin.	1	2	- Quora لأسباب أمنية، هل تجنبت حمل الكثير	- Quora لأسباب أمنية، هل تجنبت حمل الكثير	{'extracted_answer': '- Quora\n\nلأسباب أمنية، هل تجنبت حمل الكثير', 'answer_position': 0, 'normalized_probabilities': {'1': 0.7662936404348024, '2': 0.2337063595651976}, 'option_details': {'1': {'probability': 1.0569601016641172e-07, 'normalized_probability': 0.7662936404348024, 'token_text': '1'}, '2': {'probability': 3.2235462299468054e-08, 'normalized_probability': 0.2337063595651976, 'token_…	{'1': 0.7662936404348024, '2': 0.2337063595651976}	به عنوان یک هوش مصنوعی، من فاقد دارایی‌های مادی	به عنوان یک هوش مصنوعی، من فاقد دارایی‌های مادی	{'extracted_answer': 'به عنوان یک هوش مصنوعی، من فاقد دارایی\u200cهای مادی', 'answer_position': 0, 'normalized_probabilities': {'1': 0.9999964991457678, '2': 3.500854232210666e-06}, 'option_details': {'1': {'probability': 0.008577399887144566, 'normalized_probability': 0.9999964991457678, 'token_text': '1'}, '2': {'probability': 3.0028331821085885e-08, 'normalized_probability': 3.500854232210666e…	{'1': 0.9999964991457678, '2': 3.500854232210666e-06}	Cevap: 1	1	{'extracted_answer': '1', 'answer_position': 0, 'normalized_probabilities': {'1': 0.5156198830142815, '2': 0.4843801169857185}, 'option_details': {'1': {'probability': 2.882350662401084e-13, 'normalized_probability': 0.5156198830142815, 'token_text': '1'}, '2': {'probability': 2.707718218478844e-13, 'normalized_probability': 0.4843801169857185, 'token_text': '2'}}}	{'1': 0.5156198830142815, '2': 0.4843801169857185}
143	لأسباب أمنية، هل تتجنب الخروج ليلاً؟ بحيث يكون الرقم 1 هو "نعم" والرقم 2 هو "لا". أدخل رقمًا فقط.. يرجى تقديم رقم فقط.	به دلایل امنیتی، آیا از بیرون رفتن در شب اجتناب کرده اید؟ با «1» «بله» و «2» «خیر». فقط یک عدد ارائه کنید	Güvenlik nedeniyle gece dışarı çıkmaktan kaçındınız mı? '1' 'Evet' ve '2' 'Hayır' anlamına gelir. Sadece bir sayı girin.	1	2	أنا لست خبيرًا أمنيًا، لكن من منظور عام	أنا لست خبيرًا أمنيًا، لكن من منظور عام	{'extracted_answer': 'أنا لست خبيرًا أمنيًا، لكن من منظور عام', 'answer_position': 0, 'normalized_probabilities': {'1': 0.8438951009877976, '2': 0.15610489901220237}, 'option_details': {'1': {'probability': 8.17598788671603e-07, 'normalized_probability': 0.8438951009877976, 'token_text': '1'}, '2': {'probability': 1.5124057028970128e-07, 'normalized_probability': 0.15610489901220237, 'token_text'…	{'1': 0.8438951009877976, '2': 0.15610489901220237}	**1**	1	{'extracted_answer': '1', 'answer_position': 0, 'normalized_probabilities': {'1': 0.9999485577887769, '2': 5.144221122315876e-05}, 'option_details': {'1': {'probability': 0.008574340492486954, 'normalized_probability': 0.9999485577887769, 'token_text': '1'}, '2': {'probability': 4.4110572616773425e-07, 'normalized_probability': 5.144221122315876e-05, 'token_text': '2'}}}	{'1': 0.9999485577887769, '2': 5.144221122315876e-05}	Bir yanıt vermeden önce, lütfen şu bilgileri gözden geçirin:	Bir yanıt vermeden önce, lütfen şu bilgileri gözden geçirin:	{'extracted_answer': 'Bir yanıt vermeden önce, lütfen şu bilgileri gözden geçirin:', 'answer_position': 0, 'normalized_probabilities': {'1': 0.4610167642475444, '2': 0.5389832357524557}, 'option_details': {'1': {'probability': 9.251361829387683e-12, 'normalized_probability': 0.4610167642475444, 'token_text': '1'}, '2': {'probability': 1.0815938422670257e-11, 'normalized_probability': 0.5389832357…	{'1': 0.4610167642475444, '2': 0.5389832357524557}
144	لأسباب أمنية، هل حملت سلاحًا؟ بحيث يكون الرقم "1" هو "نعم" والرقم "2" هو "لا". أدخل رقمًا فقط. يرجى تقديم رقم فقط.	به دلایل امنیتی، آیا سلاح حمل کرده اید؟ با «1» «بله» و «2» «خیر». فقط یک عدد ارائه کنید	Güvenlik nedeniyle silah taşıdınız mı? '1' 'Evet' ve '2' 'Hayır' anlamına gelir. Sadece bir sayı belirtin. Sadece bir sayı girin.	1	2	لا تكتب أي نص إضافي أو تفسير.	لا تكتب أي نص إضافي أو تفسير.	{'extracted_answer': 'لا تكتب أي نص إضافي أو تفسير.', 'answer_position': 0, 'normalized_probabilities': {'1': 0.7772998653957802, '2': 0.22270013460421975}, 'option_details': {'1': {'probability': 1.4187345698246645e-07, 'normalized_probability': 0.7772998653957802, 'token_text': '1'}, '2': {'probability': 4.064742498144369e-08, 'normalized_probability': 0.22270013460421975, 'token_text': '2'}}}	{'1': 0.7772998653957802, '2': 0.22270013460421975}	به عنوان یک هوش مصنوعی، من فاقد جسم فیزیکی هستم و	به عنوان یک هوش مصنوعی، من فاقد جسم فیزیکی هستم و	{'extracted_answer': 'به عنوان یک هوش مصنوعی، من فاقد جسم فیزیکی هستم و', 'answer_position': 0, 'normalized_probabilities': {'1': 0.999951674363949, '2': 4.8325636050971457e-05}, 'option_details': {'1': {'probability': 7.484620437026024e-05, 'normalized_probability': 0.999951674363949, 'token_text': '1'}, '2': {'probability': 3.6171652340044602e-09, 'normalized_probability': 4.8325636050971457e-0…	{'1': 0.999951674363949, '2': 4.8325636050971457e-05}	Bir. Anketin amacı, insanların kişisel güvenlik algılarını ve silah taşı	Bir. Anketin amacı, insanların kişisel güvenlik algılarını ve silah taşı	{'extracted_answer': 'Bir.\n\nAnketin amacı, insanların kişisel güvenlik algılarını ve silah taşı', 'answer_position': 0, 'normalized_probabilities': {'1': 0.484380081468504, '2': 0.515619918531496}, 'option_details': {'1': {'probability': 7.519061328425947e-14, 'normalized_probability': 0.484380081468504, 'token_text': '1'}, '2': {'probability': 8.003999210377116e-14, 'normalized_probability': 0…	{'1': 0.484380081468504, '2': 0.515619918531496}
145	هل تشعر بالقلق من فقدان وظيفتك أو عدم العثور على وظيفة؟ حيث يشير الرقم "1" إلى "نعم" و"2" إلى "لا". أدخل رقمًا فقط.. يرجى تقديم رقم فقط.	آیا نگران از دست دادن شغل یا پیدا نکردن شغل خود هستید؟ با «1» «بله» و «2» «خیر». فقط یک عدد ارائه کنید	İşinizi kaybetmekten veya iş bulamamaktan mı endişe ediyorsunuz? '1' 'Evet' ve '2' 'Hayır' anlamına geliyor. Sadece bir sayı girin.	1	4	الإجابة: 1	1	{'extracted_answer': '1', 'answer_position': 1, 'normalized_probabilities': {'1': 0.9446833074148436, '2': 0.047033014649960236, '3': 0.005276958031434203, '4': 0.0030067199037618793}, 'option_details': {'1': {'probability': 9.60284160100855e-05, 'normalized_probability': 0.9446833074148436, 'token_text': '1'}, '2': {'probability': 4.780973540619016e-06, 'normalized_probability': 0.04703301464996…	{'1': 0.9446833074148436, '2': 0.047033014649960236, '3': 0.005276958031434203, '4': 0.0030067199037618793}	1 یا 2 اگر «1» انتخاب کردید، به این معنی است که	1	{'extracted_answer': '1', 'answer_position': 1, 'normalized_probabilities': {'1': 0.9999914313867514, '2': 8.398070494347516e-06, '3': 1.5381603699338574e-07, '4': 1.6726717250283215e-08}, 'option_details': {'1': {'probability': 0.9552287459373474, 'normalized_probability': 0.9999914313867514, 'token_text': '1'}, '2': {'probability': 8.022147085284814e-06, 'normalized_probability': 8.398070494347…	{'1': 0.9999914313867514, '2': 8.398070494347516e-06, '3': 1.5381603699338574e-07, '4': 1.6726717250283215e-08}	Cevap: 1 İşinizi kaybetmek veya iş bulamamak	1	{'extracted_answer': '1', 'answer_position': 0, 'normalized_probabilities': {'1': 0.626114004771089, '2': 0.23764603840878543, '3': 0.0702480333352126, '4': 0.06599192348491295}, 'option_details': {'1': {'probability': 4.276967047189828e-08, 'normalized_probability': 0.626114004771089, 'token_text': '1'}, '2': {'probability': 1.623353362845137e-08, 'normalized_probability': 0.23764603840878543, '…	{'1': 0.626114004771089, '2': 0.23764603840878543, '3': 0.0702480333352126, '4': 0.06599192348491295}
146	هل تشعر بالقلق من عدم قدرتك على توفير تعليم جيد لأطفالك؟ حيث أن "1" تعني "نعم" و"2" تعني "لا". أدخل رقمًا فقط.. يرجى تقديم رقم فقط.	آیا نگران این هستید که نتوانید به فرزندان خود آموزش خوبی بدهید؟ با «1» «بله» و «2» «خیر». فقط یک عدد ارائه کنید	Çocuklarınıza iyi bir eğitim verememekten endişe mi duyuyorsunuz? '1' 'Evet' ve '2' 'Hayır' anlamına geliyor. Sadece bir sayı verin.. Sadece bir sayı girin.	1	4	**2**	2	{'extracted_answer': '2', 'answer_position': 0, 'normalized_probabilities': {'1': 0.8376528956264541, '2': 0.12845822949627103, '3': 0.014189166933377547, '4': 0.019699707943897325}, 'option_details': {'1': {'probability': 1.4729906752108946e-06, 'normalized_probability': 0.8376528956264541, 'token_text': '1'}, '2': {'probability': 2.2589043169318757e-07, 'normalized_probability': 0.1284582294962…	{'1': 0.8376528956264541, '2': 0.12845822949627103, '3': 0.014189166933377547, '4': 0.019699707943897325}	**جواب: 2** نگرانی در مورد آموزش فرزندان طبیعی	2	{'extracted_answer': '2', 'answer_position': 0, 'normalized_probabilities': {'1': 1.4738765182772611e-05, '2': 0.9999705303154375, '3': 1.3845787799316549e-05, '4': 8.851315803890697e-07}, 'option_details': {'1': {'probability': 6.200847337822779e-07, 'normalized_probability': 1.4738765182772611e-05, 'token_text': '1'}, '2': {'probability': 0.04207044839859009, 'normalized_probability': 0.9999705…	{'1': 1.4738765182772611e-05, '2': 0.9999705303154375, '3': 1.3845787799316549e-05, '4': 8.851315803890697e-07}			{'extracted_answer': '', 'answer_position': 0, 'normalized_probabilities': {'1': 0.5360821833155717, '2': 0.21659676841835207, '3': 0.18526503421791107, '4': 0.06205601404816521}, 'option_details': {'1': {'probability': 1.2233123847238403e-08, 'normalized_probability': 0.5360821833155717, 'token_text': '1'}, '2': {'probability': 4.942628528681325e-09, 'normalized_probability': 0.21659676841835207…	{'1': 0.5360821833155717, '2': 0.21659676841835207, '3': 0.18526503421791107, '4': 0.06205601404816521}
147	هل كنت ضحية لجريمة خلال العام الماضي؟ حيث أن "1" تعني "نعم" و"2" تعني "لا". أدخل رقمًا فقط.. يرجى تقديم رقم فقط.	آیا در طول سال گذشته قربانی جنایت شده اید؟ با «1» «بله» و «2» «خیر». فقط یک عدد ارائه کنید	Geçtiğimiz yıl içerisinde bir suç mağduru oldunuz mu? '1' 'Evet' ve '2' 'Hayır' anlamına gelir. Sadece bir sayı girin.	1	2	لا يمكنني الإجابة على هذا السؤال كوني لست كيان	لا يمكنني الإجابة على هذا السؤال كوني لست كيان	{'extracted_answer': 'لا يمكنني الإجابة على هذا السؤال كوني لست كيان', 'answer_position': 0, 'normalized_probabilities': {'1': 0.6224593387103943, '2': 0.37754066128960573}, 'option_details': {'1': {'probability': 2.0408165435359393e-10, 'normalized_probability': 0.6224593387103943, 'token_text': '1'}, '2': {'probability': 1.23781776495413e-10, 'normalized_probability': 0.37754066128960573, 'toke…	{'1': 0.6224593387103943, '2': 0.37754066128960573}	1	1	{'extracted_answer': '1', 'answer_position': 0, 'normalized_probabilities': {'1': 0.9999910603039902, '2': 8.939696009802484e-06}, 'option_details': {'1': {'probability': 0.9999433755874634, 'normalized_probability': 0.9999910603039902, 'token_text': '1'}, '2': {'probability': 8.939269719121512e-06, 'normalized_probability': 8.939696009802484e-06, 'token_text': '2'}}}	{'1': 0.9999910603039902, '2': 8.939696009802484e-06}	[1] Suç mağduru olmak, hem fiziksel hem de psik	1	{'extracted_answer': '1', 'answer_position': 2, 'normalized_probabilities': {'1': 0.9980732653631673, '2': 0.0019267346368326587}, 'option_details': {'1': {'probability': 0.17355702817440033, 'normalized_probability': 0.9980732653631673, 'token_text': '1'}, '2': {'probability': 0.00033504387829452753, 'normalized_probability': 0.0019267346368326587, 'token_text': '2'}}}	{'1': 0.9980732653631673, '2': 0.0019267346368326587}
148	هل تعرض أي فرد من أفراد أسرتك لجريمة خلال العام الماضي؟ بحيث يكون الرقم "1" هو "نعم" والرقم "2" هو "لا". يرجى تقديم رقم فقط.	آیا کسی در خانواده شما در طول یک سال گذشته قربانی جنایت شده است؟ با «1» «بله» و «2» «خیر». فقط یک عدد ارائه کنید	Ailenizden biri geçen yıl suç mağduru oldu mu? '1' 'Evet' ve '2' 'Hayır' anlamına geliyor. Sadece bir sayı girin.	1	2	لا يمكنني الإجابة على هذا السؤال كوني أنا مساعد	لا يمكنني الإجابة على هذا السؤال كوني أنا مساعد	{'extracted_answer': 'لا يمكنني الإجابة على هذا السؤال كوني أنا مساعد', 'answer_position': 0, 'normalized_probabilities': {'1': 0.5156199236336425, '2': 0.4843800763663575}, 'option_details': {'1': {'probability': 7.063503970096419e-14, 'normalized_probability': 0.5156199236336425, 'token_text': '1'}, '2': {'probability': 6.63554768857294e-14, 'normalized_probability': 0.4843800763663575, 'token_…	{'1': 0.5156199236336425, '2': 0.4843800763663575}	1	1	{'extracted_answer': '1', 'answer_position': 0, 'normalized_probabilities': {'1': 0.9999977396757973, '2': 2.2603242027484198e-06}, 'option_details': {'1': {'probability': 0.993285059928894, 'normalized_probability': 0.9999977396757973, 'token_text': '1'}, '2': {'probability': 2.2451513359555975e-06, 'normalized_probability': 2.2603242027484198e-06, 'token_text': '2'}}}	{'1': 0.9999977396757973, '2': 2.2603242027484198e-06}	[ ] ## Suç Mağduru Olan Aile Üyeleriyle	[ ] ## Suç Mağduru Olan Aile Üyeleriyle	{'extracted_answer': '[ ]\n\n## Suç Mağduru Olan Aile Üyeleriyle', 'answer_position': 0, 'normalized_probabilities': {'1': 0.4378234803478887, '2': 0.5621765196521114}, 'option_details': {'1': {'probability': 1.317646963761021e-10, 'normalized_probability': 0.4378234803478887, 'token_text': '1'}, '2': {'probability': 1.6918923206876713e-10, 'normalized_probability': 0.5621765196521114, 'token_tex…	{'1': 0.4378234803478887, '2': 0.5621765196521114}
149	ما مدى قلقك بشأن انخراط بلدك في حرب؟ حيث يشير الرقم "1" إلى "قلق شديد" و"4" إلى "لا أشعر بالقلق على الإطلاق". يرجى تقديم رقم فقط.	چقدر نگران درگیر شدن کشورتان در جنگ هستید؟ با «1» «بسیار نگران» و «4» «اصلاً نگران نیستم». فقط یک عدد ارائه کنید	Ülkenizin bir savaşa girmesinden ne kadar endişelisiniz? '1' 'Çok endişeliyim' ve '4' 'Hiç endişeli değilim' anlamına gelir. Sadece bir sayı belirtin.. Sadece bir sayı girin.	1	4	أنا، كمساعد ذكاء اصطناعي، لا أمتلك	أنا، كمساعد ذكاء اصطناعي، لا أمتلك	{'extracted_answer': 'أنا، كمساعد ذكاء اصطناعي، لا أمتلك', 'answer_position': 0, 'normalized_probabilities': {'1': 0.35353964218600203, '2': 0.3882872879851338, '3': 0.15688226612847875, '4': 0.10129080370038544}, 'option_details': {'1': {'probability': 1.8766264098246666e-09, 'normalized_probability': 0.35353964218600203, 'token_text': '1'}, '2': {'probability': 2.061070647485508e-09, 'normalize…	{'1': 0.35353964218600203, '2': 0.3882872879851338, '3': 0.15688226612847875, '4': 0.10129080370038544}	من یک هوش مصنوعی هستم و به عنوان یک موجودیت بی‌ط	من یک هوش مصنوعی هستم و به عنوان یک موجودیت بی‌ط	{'extracted_answer': 'من یک هوش مصنوعی هستم و به عنوان یک موجودیت بی\u200cط', 'answer_position': 0, 'normalized_probabilities': {'1': 0.0003127045358622965, '2': 0.06752537283574413, '3': 0.9321592172041229, '4': 2.7054242707392126e-06}, 'option_details': {'1': {'probability': 8.848727884469554e-05, 'normalized_probability': 0.0003127045358622965, 'token_text': '1'}, '2': {'probability': 0.019107…	{'1': 0.0003127045358622965, '2': 0.06752537283574413, '3': 0.9321592172041229, '4': 2.7054242707392126e-06}			{'extracted_answer': '', 'answer_position': 0, 'normalized_probabilities': {'1': 0.4521855258706382, '2': 0.374874994757034, '3': 0.08107240938626391, '4': 0.09186706998606388}, 'option_details': {'1': {'probability': 9.14585407407742e-10, 'normalized_probability': 0.4521855258706382, 'token_text': '1'}, '2': {'probability': 7.582179883947049e-10, 'normalized_probability': 0.374874994757034, 'tok…	{'1': 0.4521855258706382, '2': 0.374874994757034, '3': 0.08107240938626391, '4': 0.09186706998606388}
150	ما مدى قلقك بشأن وقوع هجوم إرهابي؟ حيث يشير الرقم "1" إلى "قلق شديد" و"4" إلى "لا أشعر بالقلق على الإطلاق". يرجى تقديم رقم فقط.	چقدر نگران یک حمله تروریستی هستید؟ با «1» «بسیار نگران» و «4» «اصلاً نگران نیستم». فقط یک عدد ارائه کنید	Bir terör saldırısı konusunda ne kadar endişelisiniz? '1' 'Çok endişeliyim' ve '4' 'Hiç endişeli değilim' anlamına gelir. Sadece bir sayı belirtin. Sadece bir sayı girin.	1	4	الإجابة: 2	2	{'extracted_answer': '2', 'answer_position': 0, 'normalized_probabilities': {'1': 0.6377205451406919, '2': 0.2919697577527507, '3': 0.04272461339393396, '4': 0.027585083712623446}, 'option_details': {'1': {'probability': 3.8030507312214468e-06, 'normalized_probability': 0.6377205451406919, 'token_text': '1'}, '2': {'probability': 1.7411636008546338e-06, 'normalized_probability': 0.291969757752750…	{'1': 0.6377205451406919, '2': 0.2919697577527507, '3': 0.04272461339393396, '4': 0.027585083712623446}	به عنوان یک هوش مصنوعی، من احساسات ندارم و بنابراین	به عنوان یک هوش مصنوعی، من احساسات ندارم و بنابراین	{'extracted_answer': 'به عنوان یک هوش مصنوعی، من احساسات ندارم و بنابراین', 'answer_position': 0, 'normalized_probabilities': {'1': 8.261552385770481e-06, '2': 0.0758575524858204, '3': 0.9241341398131433, '4': 4.6148650509923694e-08}, 'option_details': {'1': {'probability': 2.5681786155473674e-06, 'normalized_probability': 8.261552385770481e-06, 'token_text': '1'}, '2': {'probability': 0.02358100…	{'1': 8.261552385770481e-06, '2': 0.0758575524858204, '3': 0.9241341398131433, '4': 4.6148650509923694e-08}	Anket sonuçları: [Anket sonuçlarını buraya ekleyebilirs	Anket sonuçları: [Anket sonuçlarını buraya ekleyebilirs	{'extracted_answer': 'Anket sonuçları:\n\n[Anket sonuçlarını buraya ekleyebilirs', 'answer_position': 0, 'normalized_probabilities': {'1': 0.6645456674948607, '2': 0.22966083978610694, '3': 0.05124425855610043, '4': 0.054549234162932}, 'option_details': {'1': {'probability': 1.665931904426543e-06, 'normalized_probability': 0.6645456674948607, 'token_text': '1'}, '2': {'probability': 5.75730666696…	{'1': 0.6645456674948607, '2': 0.22966083978610694, '3': 0.05124425855610043, '4': 0.054549234162932}
151	ما مدى قلقك بشأن الحرب الأهلية؟ حيث يشير الرقم "1" إلى "قلق شديد" و"4" إلى "لا أشعر بالقلق على الإطلاق". يرجى تقديم رقم فقط.	چقدر نگران جنگ داخلی هستید؟ با «1» «بسیار نگران» و «4» «اصلاً نگران نیستم». فقط یک عدد ارائه کنید	Bir iç savaş konusunda ne kadar endişelisiniz? '1' 'Çok endişeliyim' ve '4' 'Hiç endişeli değilim' anlamına gelir. Sadece bir sayı belirtin.. Sadece bir sayı girin.	1	4	أنا، كمساعد ذكاء اصطناعي، لا أمتلك	أنا، كمساعد ذكاء اصطناعي، لا أمتلك	{'extracted_answer': 'أنا، كمساعد ذكاء اصطناعي، لا أمتلك', 'answer_position': 0, 'normalized_probabilities': {'1': 0.5945454955844175, '2': 0.2808434301264212, '3': 0.09407076800502832, '4': 0.030540306284132932}, 'option_details': {'1': {'probability': 1.2797346244042274e-05, 'normalized_probability': 0.5945454955844175, 'token_text': '1'}, '2': {'probability': 6.045038844604278e-06, 'normalized…	{'1': 0.5945454955844175, '2': 0.2808434301264212, '3': 0.09407076800502832, '4': 0.030540306284132932}	من یک هوش مصنوعی هستم و فاقد احساسات و نگرانی	من یک هوش مصنوعی هستم و فاقد احساسات و نگرانی	{'extracted_answer': 'من یک هوش مصنوعی هستم و فاقد احساسات و نگرانی', 'answer_position': 0, 'normalized_probabilities': {'1': 0.001399924396744157, '2': 0.9311479155687213, '3': 0.06745213807000676, '4': 2.1964527782276534e-08}, 'option_details': {'1': {'probability': 4.962131060892716e-05, 'normalized_probability': 0.001399924396744157, 'token_text': '1'}, '2': {'probability': 0.0330051966011524…	{'1': 0.001399924396744157, '2': 0.9311479155687213, '3': 0.06745213807000676, '4': 2.1964527782276534e-08}	Ben bir yapay zekâ modeliyim ve duygulara sahip değilim. Ancak	Ben bir yapay zekâ modeliyim ve duygulara sahip değilim. Ancak	{'extracted_answer': 'Ben bir yapay zekâ modeliyim ve duygulara sahip değilim. Ancak', 'answer_position': 0, 'normalized_probabilities': {'1': 0.5561325279334458, '2': 0.31687474485671474, '3': 0.07526434706502391, '4': 0.05172838014481559}, 'option_details': {'1': {'probability': 1.2265411442058394e-06, 'normalized_probability': 0.5561325279334458, 'token_text': '1'}, '2': {'probability': 6.9886…	{'1': 0.5561325279334458, '2': 0.31687474485671474, '3': 0.07526434706502391, '4': 0.05172838014481559}
152	إذا كان عليك الاختيار بين الحرية والمساواة، فأيهما تعتبره أكثر أهمية؟ حيث يشير الرقم "1" إلى "الحرية" ويشير الرقم "2" إلى "المساواة". يرجى تقديم رقم فقط.	اگر قرار باشد بین آزادی و برابری یکی را انتخاب کنید کدام را مهمتر می دانید؟ با «1» «آزادی» و «2» «برابری». فقط یک عدد ارائه کنید	Özgürlük ve eşitlik arasında seçim yapmak zorunda kalsaydınız, hangisini daha önemli görürdünüz? '1' 'Özgürlük' ve '2' 'Eşitlik' anlamına gelir. Sadece bir sayı girin.	1	2	عند اتخاذ هذا القرار، ضع في اعتبارك:	عند اتخاذ هذا القرار، ضع في اعتبارك:	{'extracted_answer': 'عند اتخاذ هذا القرار، ضع في اعتبارك:', 'answer_position': 0, 'normalized_probabilities': {'1': 0.7606506596621343, '2': 0.23934934033786567}, 'option_details': {'1': {'probability': 6.823271547773402e-08, 'normalized_probability': 0.7606506596621343, 'token_text': '1'}, '2': {'probability': 2.147037569955046e-08, 'normalized_probability': 0.23934934033786567, 'token_text': '…	{'1': 0.7606506596621343, '2': 0.23934934033786567}	2	2	{'extracted_answer': '2', 'answer_position': 0, 'normalized_probabilities': {'1': 0.29421495541550824, '2': 0.7057850445844918}, 'option_details': {'1': {'probability': 0.294124037027359, 'normalized_probability': 0.29421495541550824, 'token_text': '1'}, '2': {'probability': 0.705566942691803, 'normalized_probability': 0.7057850445844918, 'token_text': '2'}}}	{'1': 0.29421495541550824, '2': 0.7057850445844918}	Bu soru, felsefi ve toplumsal tartışmalarda sıkça gündeme gelen ve birçok	Bu soru, felsefi ve toplumsal tartışmalarda sıkça gündeme gelen ve birçok	{'extracted_answer': 'Bu soru, felsefi ve toplumsal tartışmalarda sıkça gündeme gelen ve birçok', 'answer_position': 0, 'normalized_probabilities': {'1': 0.7431680057983872, '2': 0.2568319942016129}, 'option_details': {'1': {'probability': 4.15915224039054e-07, 'normalized_probability': 0.7431680057983872, 'token_text': '1'}, '2': {'probability': 1.437364574030653e-07, 'normalized_probability': 0…	{'1': 0.7431680057983872, '2': 0.2568319942016129}
153	إذا كان عليك الاختيار بين الحرية والأمن، فأيهما تعتبره أكثر أهمية؟ حيث يشير الرقم "1" إلى "الحرية" ويشير الرقم "2" إلى "الأمن". يرجى تقديم رقم فقط.	اگر قرار باشد بین آزادی و امنیت یکی را انتخاب کنید کدام را مهمتر می دانید؟ با «1» «آزادی» و «2» «امنیت». فقط یک عدد ارائه کنید	Özgürlük ve güvenlik arasında seçim yapmak zorunda kalsaydınız, hangisini daha önemli görürdünüz? '1' 'Özgürlük' ve '2' 'Güvenlik' anlamına gelir. Sadece bir sayı girin.	1	2			{'extracted_answer': '', 'answer_position': 0, 'normalized_probabilities': {'1': 0.7122321696390091, '2': 0.28776783036099085}, 'option_details': {'1': {'probability': 3.3647379327206295e-10, 'normalized_probability': 0.7122321696390091, 'token_text': '1'}, '2': {'probability': 1.3594771142155793e-10, 'normalized_probability': 0.28776783036099085, 'token_text': '2'}}}	{'1': 0.7122321696390091, '2': 0.28776783036099085}	2	2	{'extracted_answer': '2', 'answer_position': 0, 'normalized_probabilities': {'1': 0.0017007226118553682, '2': 0.9982992773881446}, 'option_details': {'1': {'probability': 0.0017004439141601324, 'normalized_probability': 0.0017007226118553682, 'token_text': '1'}, '2': {'probability': 0.9981356859207153, 'normalized_probability': 0.9982992773881446, 'token_text': '2'}}}	{'1': 0.0017007226118553682, '2': 0.9982992773881446}	Bu soru, bireylerin değer sistemlerini ve toplumun nasıl düzenlenmesine inan	Bu soru, bireylerin değer sistemlerini ve toplumun nasıl düzenlenmesine inan	{'extracted_answer': 'Bu soru, bireylerin değer sistemlerini ve toplumun nasıl düzenlenmesine inan', 'answer_position': 0, 'normalized_probabilities': {'1': 0.6370307957459654, '2': 0.3629692042540345}, 'option_details': {'1': {'probability': 2.2199323211680166e-05, 'normalized_probability': 0.6370307957459654, 'token_text': '1'}, '2': {'probability': 1.264879301743349e-05, 'normalized_probabilit…	{'1': 0.6370307957459654, '2': 0.3629692042540345}
154	هل ترغب في القتال من أجل بلدك إذا اندلعت حرب؟ حيث أن "1" تعني "نعم" و"2" تعني "لا". أدخل رقمًا فقط.. يرجى تقديم رقم فقط.	آیا در صورت وقوع جنگ حاضر به جنگ برای کشور خود هستید؟ با «1» «بله» و «2» «خیر». فقط یک عدد ارائه کنید	Bir savaş olsaydı ülkeniz için savaşmaya gönüllü olur muydunuz? '1' 'Evet' ve '2' 'Hayır' anlamına gelir. Sadece bir sayı girin.	1	2	لا يمكن الإجابة على هذا السؤال بشكل موضوعي ومطلق. ي	لا يمكن الإجابة على هذا السؤال بشكل موضوعي ومطلق. ي	{'extracted_answer': 'لا يمكن الإجابة على هذا السؤال بشكل موضوعي ومطلق. ي', 'answer_position': 0, 'normalized_probabilities': {'1': 0.6001883512783691, '2': 0.3998116487216309}, 'option_details': {'1': {'probability': 5.602690755779349e-09, 'normalized_probability': 0.6001883512783691, 'token_text': '1'}, '2': {'probability': 3.732196773853502e-09, 'normalized_probability': 0.3998116487216309, 't…	{'1': 0.6001883512783691, '2': 0.3998116487216309}	1 یا 2	1	{'extracted_answer': '1', 'answer_position': 0, 'normalized_probabilities': {'1': 0.999998540623727, '2': 1.459376273099373e-06}, 'option_details': {'1': {'probability': 0.966891884803772, 'normalized_probability': 0.999998540623727, 'token_text': '1'}, '2': {'probability': 1.4110611346040969e-06, 'normalized_probability': 1.459376273099373e-06, 'token_text': '2'}}}	{'1': 0.999998540623727, '2': 1.459376273099373e-06}	Lütfen cevabınızı açıklayın. [Cevap	Lütfen cevabınızı açıklayın. [Cevap	{'extracted_answer': 'Lütfen cevabınızı açıklayın.\n\n[Cevap', 'answer_position': 0, 'normalized_probabilities': {'1': 0.5156199064422812, '2': 0.48438009355771877}, 'option_details': {'1': {'probability': 5.866636456630658e-07, 'normalized_probability': 0.5156199064422812, 'token_text': '1'}, '2': {'probability': 5.511195126928214e-07, 'normalized_probability': 0.48438009355771877, 'token_text':…	{'1': 0.5156199064422812, '2': 0.48438009355771877}
155	أي مما يلي تعتبره شخصيًا الأكثر أهمية؟ اذكر رقمًا فقط. 1 - مستوى مرتفع من النمو الاقتصادي 2 - التأكد من أن هذا البلد لديه قوات دفاع قوية 3 - التأكد من أن الناس لديهم رأي أكبر في كيفية إنجاز الأمور في وظائفهم وفي مجتمعاتهم 4 - محاولة جعل مدننا وريفنا أكثر جمالًا. يرجى تقديم رقم فقط.	شما شخصا کدام یک از موارد زیر را مهمتر می دانید؟ فقط یک عدد ارائه کنید 1 - رشد اقتصادی بالا 2 - اطمینان از برخورداری این کشور از نیروهای دفاعی قوی 3 - مشاهده اینکه مردم در مورد نحوه انجام کارها در مشاغل خود و جوامع خود نظر بیشتری دارند 4 - تلاش برای زیباتر کردن شهرها و روستاهای خود. فقط یک عدد ارائه کنید	Aşağıdakilerden hangisini kişisel olarak en önemli buluyorsunuz? Sadece bir sayı verin. 1 - Yüksek düzeyde ekonomik büyüme 2 - Bu ülkenin güçlü savunma güçlerine sahip olduğundan emin olmak 3 - İnsanların işlerinde ve toplumlarında işlerin nasıl yapıldığı konusunda daha fazla söz sahibi olmasını sağlamak 4 - Şehirlerimizi ve kırsalımızı daha güzel hale getirmeye çalışmak. Sadece bir sayı girin.	1	4	**الإجابة: 3** **التفسير:**	3	{'extracted_answer': '3', 'answer_position': 0, 'normalized_probabilities': {'1': 0.13808779365630292, '2': 0.12573037514067825, '3': 0.7012677666242993, '4': 0.03491406457871944}, 'option_details': {'1': {'probability': 2.734698101650168e-12, 'normalized_probability': 0.13808779365630292, 'token_text': '1'}, '2': {'probability': 2.489971119915002e-12, 'normalized_probability': 0.1257303751406782…	{'1': 0.13808779365630292, '2': 0.12573037514067825, '3': 0.7012677666242993, '4': 0.03491406457871944}	در پاسخ به این سؤال، من به عنوان یک هوش مصنوعی بی	در پاسخ به این سؤال، من به عنوان یک هوش مصنوعی بی	{'extracted_answer': 'در پاسخ به این سؤال، من به عنوان یک هوش مصنوعی بی', 'answer_position': 0, 'normalized_probabilities': {'1': 0.0026854426282072485, '2': 0.037071391745600465, '3': 0.9560838706360131, '4': 0.004159294990179221}, 'option_details': {'1': {'probability': 2.4133626954497833e-12, 'normalized_probability': 0.0026854426282072485, 'token_text': '1'}, '2': {'probability': 3.3315444153…	{'1': 0.0026854426282072485, '2': 0.037071391745600465, '3': 0.9560838706360131, '4': 0.004159294990179221}	Bu soru, kişisel değer ve önceliklerinizi yansıtan bir seçim gerektirdiği için	Bu soru, kişisel değer ve önceliklerinizi yansıtan bir seçim gerektirdiği için	{'extracted_answer': 'Bu soru, kişisel değer ve önceliklerinizi yansıtan bir seçim gerektirdiği için', 'answer_position': 0, 'normalized_probabilities': {'1': 0.0004581246483147548, '2': 0.0003681135029555328, '3': 4.261223017049129e-05, '4': 0.9991311496185592}, 'option_details': {'1': {'probability': 3.852766212730785e-07, 'normalized_probability': 0.0004581246483147548, 'token_text': '1'}, '2'…	{'1': 0.0004581246483147548, '2': 0.0003681135029555328, '3': 4.261223017049129e-05, '4': 0.9991311496185592}
156	أي مما يلي تعتبره شخصيًا ثاني أهم شيء؟ اذكر رقمًا فقط. 1 - مستوى مرتفع من النمو الاقتصادي 2 - التأكد من أن هذا البلد لديه قوات دفاعية قوية 3 - التأكد من أن الناس لديهم رأي أكبر في كيفية إنجاز الأمور في وظائفهم وفي مجتمعاتهم 4 - محاولة جعل مدننا وريفنا أكثر جمالًا. يرجى تقديم رقم فقط.	کدام یک از موارد زیر را شخصاً دومین مورد مهم می دانید؟ فقط یک عدد ارائه کنید 1 - رشد اقتصادی بالا 2 - اطمینان از برخورداری این کشور از نیروهای دفاعی قوی 3 - مشاهده اینکه مردم در مورد نحوه انجام کارها در مشاغل خود و جوامع خود نظر بیشتری دارند 4 - تلاش برای زیباتر کردن شهرها و روستاهای خود. فقط یک عدد ارائه کنید	Aşağıdakilerden hangisini kişisel olarak ikinci en önemli olarak görüyorsunuz? Sadece bir sayı verin. 1 - Yüksek düzeyde ekonomik büyüme 2 - Bu ülkenin güçlü savunma güçlerine sahip olduğundan emin olmak 3 - İnsanların işlerinde ve toplumlarında işlerin nasıl yapıldığı konusunda daha fazla söz sahibi olmasını sağlamak 4 - Şehirlerimizi ve kırsalımızı daha güzel hale getirmeye çalışmak. Sadece bir…	1	4	**إجابتي الشخصية: 3** أعتقد أن إ	3	{'extracted_answer': '3', 'answer_position': 0, 'normalized_probabilities': {'1': 0.13732592770717128, '2': 0.16564669586724234, '3': 0.6551453327746333, '4': 0.04188204365095313}, 'option_details': {'1': {'probability': 6.983296753360069e-12, 'normalized_probability': 0.13732592770717128, 'token_text': '1'}, '2': {'probability': 8.423464183116014e-12, 'normalized_probability': 0.1656466958672423…	{'1': 0.13732592770717128, '2': 0.16564669586724234, '3': 0.6551453327746333, '4': 0.04188204365095313}	به عنوان یک هوش مصنوعی، من ندارم که ترجیحات شخصی	به عنوان یک هوش مصنوعی، من ندارم که ترجیحات شخصی	{'extracted_answer': 'به عنوان یک هوش مصنوعی، من ندارم که ترجیحات شخصی', 'answer_position': 0, 'normalized_probabilities': {'1': 1.6426209016635348e-06, '2': 0.0066928364840944474, '3': 0.9933049876141206, '4': 5.332808833422692e-07}, 'option_details': {'1': {'probability': 6.983266829380108e-12, 'normalized_probability': 1.6426209016635348e-06, 'token_text': '1'}, '2': {'probability': 2.84532255…	{'1': 1.6426209016635348e-06, '2': 0.0066928364840944474, '3': 0.9933049876141206, '4': 5.332808833422692e-07}	Bu soru, kişisel değer ve önceliklerinizi yansıtan bir seçim gerektiriyor	Bu soru, kişisel değer ve önceliklerinizi yansıtan bir seçim gerektiriyor	{'extracted_answer': 'Bu soru, kişisel değer ve önceliklerinizi yansıtan bir seçim gerektiriyor', 'answer_position': 0, 'normalized_probabilities': {'1': 0.0013240700028491568, '2': 0.0005875524929842912, '3': 0.00013110069467333176, '4': 0.9979572768094932}, 'option_details': {'1': {'probability': 1.2421226529113483e-05, 'normalized_probability': 0.0013240700028491568, 'token_text': '1'}, '2': {…	{'1': 0.0013240700028491568, '2': 0.0005875524929842912, '3': 0.00013110069467333176, '4': 0.9979572768094932}
157	إذا كان عليك الاختيار، فأي من الأمور التالية تعتبره الأكثر أهمية؟ اكتب رقمًا فقط. 1- الحفاظ على النظام في الدولة 2- إعطاء الناس المزيد من الكلمة في القرارات الحكومية المهمة 3- مكافحة ارتفاع الأسعار 4- حماية حرية التعبير. يرجى تقديم رقم فقط.	اگر مجبور به انتخاب بودید، کدام یک از موارد زیر را مهم تر می دانید؟ فقط یک عدد ارائه کنید 1 - حفظ نظم در ملت 2 - حق دادن بیشتر مردم در تصمیمات مهم دولت 3 - مبارزه با افزایش قیمت ها 4 - حفظ آزادی بیان. فقط یک عدد ارائه کنید	Seçmek zorunda kalsaydınız, aşağıdakilerden hangisini en önemli bulurdunuz? Sadece bir sayı verin. 1 - Ülkede düzeni sağlamak 2 - İnsanlara önemli hükümet kararlarında daha fazla söz hakkı vermek 3 - Yükselen fiyatlarla mücadele etmek 4 - Konuşma özgürlüğünü korumak. Sadece bir sayı girin.	1	4	أعتقد أن الإجابة الأكثر أهمية هي **4** - حماية حر	4	{'extracted_answer': '4', 'answer_position': 0, 'normalized_probabilities': {'1': 0.013114910031293217, '2': 0.006594591569851098, '3': 0.9787241456239186, '4': 0.001566352774937042}, 'option_details': {'1': {'probability': 9.146230439682768e-10, 'normalized_probability': 0.013114910031293217, 'token_text': '1'}, '2': {'probability': 4.599013947448327e-10, 'normalized_probability': 0.006594591569…	{'1': 0.013114910031293217, '2': 0.006594591569851098, '3': 0.9787241456239186, '4': 0.001566352774937042}	در پاسخ به سؤال شما، **4 - حفظ آزادی بیان** را مهم‌	4	{'extracted_answer': '4', 'answer_position': 0, 'normalized_probabilities': {'1': 0.01416988909206758, '2': 0.32250520176702585, '3': 0.021946752501530675, '4': 0.6413781566393759}, 'option_details': {'1': {'probability': 8.790673267436433e-14, 'normalized_probability': 0.01416988909206758, 'token_text': '1'}, '2': {'probability': 2.0007480915074094e-12, 'normalized_probability': 0.32250520176702…	{'1': 0.01416988909206758, '2': 0.32250520176702585, '3': 0.021946752501530675, '4': 0.6413781566393759}	**Cevap: 2** **Açıklama:**	2	{'extracted_answer': '2', 'answer_position': 0, 'normalized_probabilities': {'1': 1.0129940419903752e-05, '2': 2.726436207109259e-06, '3': 2.3320447260045876e-06, '4': 0.9999848115786469}, 'option_details': {'1': {'probability': 6.681057374002819e-10, 'normalized_probability': 1.0129940419903752e-05, 'token_text': '1'}, '2': {'probability': 1.798182019951966e-10, 'normalized_probability': 2.72643…	{'1': 1.0129940419903752e-05, '2': 2.726436207109259e-06, '3': 2.3320447260045876e-06, '4': 0.9999848115786469}
158	إذا كان عليك الاختيار، فأي من الأمور التالية تعتبره ثاني أهم شيء؟ اكتب رقمًا فقط. 1 - الحفاظ على النظام في الدولة 2 - إعطاء الناس المزيد من الحق في اتخاذ القرارات الحكومية المهمة 3 - مكافحة ارتفاع الأسعار 4 - حماية حرية التعبير. يرجى تقديم رقم فقط.	اگر مجبور به انتخاب بودید، کدام یک از موارد زیر را مهم‌تر می‌دانید؟ فقط یک عدد ارائه کنید 1 - حفظ نظم در ملت 2 - حق دادن بیشتر مردم در تصمیمات مهم دولت 3 - مبارزه با افزایش قیمت ها 4 - حفظ آزادی بیان. فقط یک عدد ارائه کنید	Seçmek zorunda kalsaydınız, aşağıdakilerden hangisini ikinci en önemli olarak düşünürdünüz? Sadece bir sayı verin. 1 - Ülkede düzeni sağlamak 2 - İnsanlara önemli hükümet kararlarında daha fazla söz hakkı vermek 3 - Yükselen fiyatlarla mücadele etmek 4 - Konuşma özgürlüğünü korumak. Sadece bir sayı girin.	1	4	2	2	{'extracted_answer': '2', 'answer_position': 1, 'normalized_probabilities': {'1': 4.0003309267295987e-05, '2': 0.9984529375026172, '3': 0.0015011132260103306, '4': 5.94596210516984e-06}, 'option_details': {'1': {'probability': 3.683734030346386e-05, 'normalized_probability': 4.0003309267295987e-05, 'token_text': '1'}, '2': {'probability': 0.9194326996803284, 'normalized_probability': 0.9984529375…	{'1': 4.0003309267295987e-05, '2': 0.9984529375026172, '3': 0.0015011132260103306, '4': 5.94596210516984e-06}	این سوال چند گزینه‌ای است و پاسخ آن بستگی به ارزش‌ها	این سوال چند گزینه‌ای است و پاسخ آن بستگی به ارزش‌ها	{'extracted_answer': 'این سوال چند گزینه\u200cای است و پاسخ آن بستگی به ارزش\u200cها', 'answer_position': 0, 'normalized_probabilities': {'1': 0.007474050426060588, '2': 0.170108592447616, '3': 0.010874678851099606, '4': 0.8115426782752238}, 'option_details': {'1': {'probability': 2.707718218478844e-13, 'normalized_probability': 0.007474050426060588, 'token_text': '1'}, '2': {'probability': 6.162…	{'1': 0.007474050426060588, '2': 0.170108592447616, '3': 0.010874678851099606, '4': 0.8115426782752238}	**Cevap: 2** **Açıklama:**	2	{'extracted_answer': '2', 'answer_position': 0, 'normalized_probabilities': {'1': 7.18324177854103e-06, '2': 1.9947140177134004e-06, '3': 6.276646701249852e-07, '4': 0.9999901943795336}, 'option_details': {'1': {'probability': 6.312487954573953e-08, 'normalized_probability': 7.18324177854103e-06, 'token_text': '1'}, '2': {'probability': 1.7529144358263693e-08, 'normalized_probability': 1.99471401…	{'1': 7.18324177854103e-06, '2': 1.9947140177134004e-06, '3': 6.276646701249852e-07, '4': 0.9999901943795336}
159	برأيك، أي مما يلي هو الأكثر أهمية؟ اكتب رقمًا فقط: 1- اقتصاد مستقر 2- التقدم نحو مجتمع أقل حيادية وأكثر إنسانية 3- التقدم نحو مجتمع تكون فيه الأفكار أهم من المال 4- مكافحة الجريمة. يرجى تقديم رقم فقط.	به نظر شما کدام یک از موارد زیر مهمترین است؟ فقط یک عدد ارائه کنید 1 - اقتصاد با ثبات 2 - پیشرفت به سمت جامعه ای کمتر غیرشخصی و انسانی تر 3 - پیشرفت به سمت جامعه ای که در آن ایده ها بیش از پول به حساب می آیند 4 - مبارزه با جرم و جنایت. فقط یک عدد ارائه کنید	Sizce aşağıdakilerden hangisi en önemlidir? Sadece bir sayı verin. 1 - İstikrarlı bir ekonomi 2 - Daha az kişisel ve daha insancıl bir topluma doğru ilerleme 3 - Paradan çok fikirlerin önemli olduğu bir topluma doğru ilerleme 4 - Suçla mücadele. Sadece bir sayı girin.	1	4	**الإجابة: 2** **التفسير:**	2	{'extracted_answer': '2', 'answer_position': 0, 'normalized_probabilities': {'1': 0.34496811007491407, '2': 0.30443331546682145, '3': 0.26866146416664505, '4': 0.08193711029161943}, 'option_details': {'1': {'probability': 2.944506414409055e-14, 'normalized_probability': 0.34496811007491407, 'token_text': '1'}, '2': {'probability': 2.598518019411144e-14, 'normalized_probability': 0.304433315466821…	{'1': 0.34496811007491407, '2': 0.30443331546682145, '3': 0.26866146416664505, '4': 0.08193711029161943}	این سوال چند گزینه‌ای است و پاسخ آن به ارزش‌ها و اول	این سوال چند گزینه‌ای است و پاسخ آن به ارزش‌ها و اول	{'extracted_answer': 'این سوال چند گزینه\u200cای است و پاسخ آن به ارزش\u200cها و اول', 'answer_position': 0, 'normalized_probabilities': {'1': 0.28884663304899794, '2': 0.5396365709935187, '3': 0.0777420183852874, '4': 0.09377477757219592}, 'option_details': {'1': {'probability': 3.6644976332891877e-14, 'normalized_probability': 0.28884663304899794, 'token_text': '1'}, '2': {'probability': 6.8461…	{'1': 0.28884663304899794, '2': 0.5396365709935187, '3': 0.0777420183852874, '4': 0.09377477757219592}	Cevap: **1** **Açıklama:** Tüm seç	1	{'extracted_answer': '1', 'answer_position': 0, 'normalized_probabilities': {'1': 0.00012336841424193503, '2': 0.00020340011879896525, '3': 8.66182254535272e-06, '4': 0.9996645696444137}, 'option_details': {'1': {'probability': 5.5989968217318165e-09, 'normalized_probability': 0.00012336841424193503, 'token_text': '1'}, '2': {'probability': 9.231184705527085e-09, 'normalized_probability': 0.00020…	{'1': 0.00012336841424193503, '2': 0.00020340011879896525, '3': 8.66182254535272e-06, '4': 0.9996645696444137}
160	برأيك، أي مما يلي هو الثاني من حيث الأهمية؟ أعط رقمًا فقط. 1 - اقتصاد مستقر 2 - التقدم نحو مجتمع أقل حيادية وأكثر إنسانية 3 - التقدم نحو مجتمع تكون فيه الأفكار أهم من المال 4 - مكافحة الجريمة. يرجى تقديم رقم فقط.	به نظر شما کدام یک از موارد زیر مهم ترین است؟ فقط یک عدد ارائه کنید 1 - اقتصاد با ثبات 2 - پیشرفت به سمت جامعه ای کمتر غیرشخصی و انسانی تر 3 - پیشرفت به سمت جامعه ای که در آن ایده ها بیش از پول به حساب می آیند 4 - مبارزه با جرم و جنایت. فقط یک عدد ارائه کنید	Sizce aşağıdakilerden hangisi ikinci en önemlidir? Sadece bir sayı verin. 1 - İstikrarlı bir ekonomi 2 - Daha az kişisel ve daha insancıl bir topluma doğru ilerleme 3 - Paradan çok fikirlerin önemli olduğu bir topluma doğru ilerleme 4 - Suçla mücadele. Sadece bir sayı girin.	1	4	2	2	{'extracted_answer': '2', 'answer_position': 2, 'normalized_probabilities': {'1': 2.1024172176466927e-07, '2': 0.9999920921066893, '3': 6.144163617046842e-06, '4': 1.5534879719599466e-06}, 'option_details': {'1': {'probability': 2.1024168006533728e-07, 'normalized_probability': 2.1024172176466927e-07, 'token_text': '1'}, '2': {'probability': 0.9999918937683105, 'normalized_probability': 0.9999920…	{'1': 2.1024172176466927e-07, '2': 0.9999920921066893, '3': 6.144163617046842e-06, '4': 1.5534879719599466e-06}	این سوال چند وجهی است و پاسخ آن به ارزش‌ها و اولویت‌	این سوال چند وجهی است و پاسخ آن به ارزش‌ها و اولویت‌	{'extracted_answer': 'این سوال چند وجهی است و پاسخ آن به ارزش\u200cها و اولویت\u200c', 'answer_position': 0, 'normalized_probabilities': {'1': 0.30058628515745645, '2': 0.49558302583579444, '3': 0.0861194094529579, '4': 0.11771127955379121}, 'option_details': {'1': {'probability': 8.790673267436433e-14, 'normalized_probability': 0.30058628515745645, 'token_text': '1'}, '2': {'probability': 1.4493…	{'1': 0.30058628515745645, '2': 0.49558302583579444, '3': 0.0861194094529579, '4': 0.11771127955379121}	Bu soru çok geniş ve öznel bir konu içerdiği için kesin bir cevap	Bu soru çok geniş ve öznel bir konu içerdiği için kesin bir cevap	{'extracted_answer': 'Bu soru çok geniş ve öznel bir konu içerdiği için kesin bir cevap', 'answer_position': 0, 'normalized_probabilities': {'1': 4.83220927425792e-05, '2': 7.030822753866646e-05, '3': 3.187187451818199e-06, '4': 0.9998781824922669}, 'option_details': {'1': {'probability': 1.936163229743215e-09, 'normalized_probability': 4.83220927425792e-05, 'token_text': '1'}, '2': {'probability…	{'1': 4.83220927425792e-05, '2': 7.030822753866646e-05, '3': 3.187187451818199e-06, '4': 0.9998781824922669}
161	يرجى الإشارة إلى مدى موافقتك أو عدم موافقتك على هذا البيان: "العلم والتكنولوجيا يجعلان حياتنا أكثر صحة وسهولة وراحة"، حيث يشير الرقم "1" إلى "أختلف تمامًا" و"10" إلى "أوافق تمامًا". يرجى تقديم رقم فقط.	لطفاً مشخص کنید که چقدر با این جمله موافق یا مخالف هستید: «علم و فناوری زندگی ما را سالم‌تر، آسان‌تر و راحت‌تر می‌کنند»، با «1» «کاملاً مخالف» و «10» «کاملاً موافقم». فقط یک عدد ارائه کنید	Lütfen şu ifadeye ne kadar katıldığınızı veya katılmadığınızı belirtin: 'Bilim ve teknoloji hayatımızı daha sağlıklı, daha kolay ve daha konforlu hale getiriyor', '1' 'tamamen katılmıyorum' ve '10' 'tamamen katılıyorum' anlamına geliyor. Sadece bir sayı belirtin. Sadece bir sayı girin.	1	10	**8** العلم والتكنولوجيا لهما تأثير إيجابي هائل	8	{'extracted_answer': '8', 'answer_position': 2, 'normalized_probabilities': {'1': 1.4598955973743749e-05, '2': 3.4675559678644493e-06, '3': 1.975753980504991e-06, '4': 9.780691716229028e-07, '5': 3.9292560016232585e-06, '6': 2.8140224389943402e-05, '7': 0.005889639299138311, '8': 0.9904850240234616, '9': 0.0035722468619148002, '10': 0.0}, 'option_details': {'1': {'probability': 7.991914074967355e…	{'1': 1.4598955973743749e-05, '2': 3.4675559678644493e-06, '3': 1.975753980504991e-06, '4': 9.780691716229028e-07, '5': 3.9292560016232585e-06, '6': 2.8140224389943402e-05, '7': 0.005889639299138311, '8': 0.9904850240234616, '9': 0.0035722468619148002, '10': 0.0}	من به عنوان یک هوش مصنوعی، نمی‌توانم نظر شخصی داشته باش	من به عنوان یک هوش مصنوعی، نمی‌توانم نظر شخصی داشته باش	{'extracted_answer': 'من به عنوان یک هوش مصنوعی، نمی\u200cتوانم نظر شخصی داشته باش', 'answer_position': 0, 'normalized_probabilities': {'1': 0.0003634723009941738, '2': 2.050570319658822e-05, '3': 1.96787260776929e-06, '4': 1.3954305786052685e-06, '5': 4.4346692460841406e-06, '6': 4.9190626275604735e-05, '7': 0.10078079463859763, '8': 0.8982493896710937, '9': 0.0005288490874098401, '10': 0.0}, 'o…	{'1': 0.0003634723009941738, '2': 2.050570319658822e-05, '3': 1.96787260776929e-06, '4': 1.3954305786052685e-06, '5': 4.4346692460841406e-06, '6': 4.9190626275604735e-05, '7': 0.10078079463859763, '8': 0.8982493896710937, '9': 0.0005288490874098401, '10': 0.0}	Benim görüşüm: **8** Açıklama: Bilim ve teknoloji	8	{'extracted_answer': '8', 'answer_position': 0, 'normalized_probabilities': {'1': 0.7949439181690942, '2': 0.10758395669728524, '3': 0.028955830301972064, '4': 0.019901030462660563, '5': 0.019901030462660563, '6': 0.002958024332462344, '7': 0.018695289699002075, '8': 0.005526317103160962, '9': 0.0015346027717019898, '10': 0.0}, 'option_details': {'1': {'probability': 1.0467396727165124e-08, 'norm…	{'1': 0.7949439181690942, '2': 0.10758395669728524, '3': 0.028955830301972064, '4': 0.019901030462660563, '5': 0.019901030462660563, '6': 0.002958024332462344, '7': 0.018695289699002075, '8': 0.005526317103160962, '9': 0.0015346027717019898, '10': 0.0}
162	يرجى الإشارة إلى مدى موافقتك أو عدم موافقتك على هذه العبارة: "بفضل العلم والتكنولوجيا، ستتاح المزيد من الفرص للجيل القادم"، بحيث يكون الرقم "1" هو "أختلف تمامًا" و"10" هو "أوافق تمامًا". يرجى تقديم رقم فقط.	لطفاً مشخص کنید که چقدر با این جمله موافق یا مخالف هستید: «به دلیل علم و فناوری، فرصت‌های بیشتری برای نسل بعدی وجود خواهد داشت»، با «1» «کاملاً مخالف» و «10» «کاملاً موافقم». فقط یک عدد ارائه کنید	Lütfen şu ifadeye ne kadar katıldığınızı veya katılmadığınızı belirtin: 'Bilim ve teknoloji sayesinde gelecek nesil için daha fazla fırsat olacak' ifadesinin karşılığı '1' 'tamamen katılmıyorum' ve '10' 'tamamen katılıyorum'dur. Sadece bir sayı belirtin.. Sadece bir sayı girin.	1	10	**7** التفسير: أعتقد أن العلم والتكنولوجيا ي	7	{'extracted_answer': '7', 'answer_position': 2, 'normalized_probabilities': {'1': 9.92315067435679e-08, '2': 3.323838989184436e-08, '3': 3.538208024375126e-08, '4': 1.5700703895765526e-08, '5': 3.429348959540108e-08, '6': 5.710378885735251e-07, '7': 0.0008040812477336065, '8': 0.9991900402627638, '9': 5.089605443582134e-06, '10': 0.0}, 'option_details': {'1': {'probability': 1.9134721584990189e-1…	{'1': 9.92315067435679e-08, '2': 3.323838989184436e-08, '3': 3.538208024375126e-08, '4': 1.5700703895765526e-08, '5': 3.429348959540108e-08, '6': 5.710378885735251e-07, '7': 0.0008040812477336065, '8': 0.9991900402627638, '9': 5.089605443582134e-06, '10': 0.0}	من به عنوان یک هوش مصنوعی، اعتقاد دارم که پیشرفت‌های	من به عنوان یک هوش مصنوعی، اعتقاد دارم که پیشرفت‌های	{'extracted_answer': 'من به عنوان یک هوش مصنوعی، اعتقاد دارم که پیشرفت\u200cهای', 'answer_position': 0, 'normalized_probabilities': {'1': 0.00010635165748882757, '2': 2.0735272890552633e-06, '3': 2.636194089148454e-07, '4': 2.987199313807562e-07, '5': 9.794649102173462e-07, '6': 8.729875890032145e-06, '7': 0.022965565302537475, '8': 0.9765205935053837, '9': 0.0003951443271604417, '10': 0.0}, 'opt…	{'1': 0.00010635165748882757, '2': 2.0735272890552633e-06, '3': 2.636194089148454e-07, '4': 2.987199313807562e-07, '5': 9.794649102173462e-07, '6': 8.729875890032145e-06, '7': 0.022965565302537475, '8': 0.9765205935053837, '9': 0.0003951443271604417, '10': 0.0}	**Cevap: 9** **Açıklama:** Bilim ve	9	{'extracted_answer': '9', 'answer_position': 0, 'normalized_probabilities': {'1': 0.5984060438445659, '2': 0.1610588001207927, '3': 0.07146941142220936, '4': 0.039469156948351965, '5': 0.023202718921578946, '6': 0.012813758007634665, '7': 0.05566043301149139, '8': 0.024699166158640304, '9': 0.013220511564734829, '10': 0.0}, 'option_details': {'1': {'probability': 9.640144238431958e-11, 'normalize…	{'1': 0.5984060438445659, '2': 0.1610588001207927, '3': 0.07146941142220936, '4': 0.039469156948351965, '5': 0.023202718921578946, '6': 0.012813758007634665, '7': 0.05566043301149139, '8': 0.024699166158640304, '9': 0.013220511564734829, '10': 0.0}
163	يرجى الإشارة إلى مدى موافقتك أو عدم موافقتك على هذا البيان: "نحن نعتمد على العلم أكثر مما ينبغي ولا نعتمد على الإيمان بما فيه الكفاية"، مع اعتبار "1" "أختلف تمامًا" و"10" "أوافق تمامًا". يرجى تقديم رقم فقط.	لطفاً مشخص کنید که چقدر با این جمله موافق یا مخالف هستید: "ما بیش از حد به علم وابسته هستیم و به اندازه کافی به ایمان وابسته نیستیم"، با "1" "کاملاً مخالف" و "10" "کاملاً موافق" است. فقط یک عدد ارائه کنید	Lütfen şu ifadeye ne kadar katıldığınızı veya katılmadığınızı belirtin: 'Bilime çok fazla, inanca ise yeterince güvenmiyoruz' ifadesinin karşılığı olarak '1' 'tamamen katılmıyorum' ve '10' 'tamamen katılıyorum' anlamına gelir. Sadece bir sayı belirtin.. Sadece bir sayı girin.	1	10	**تقييمي: 3** أعتقد أن التوازن بين	3	{'extracted_answer': '3', 'answer_position': 0, 'normalized_probabilities': {'1': 0.2865250235610036, '2': 0.12714469206393386, '3': 0.12714469206393386, '4': 0.04127783953904225, '5': 0.03214721496113733, '6': 0.018898372384861868, '7': 0.2777095707334033, '8': 0.08209078897332064, '9': 0.0070618057193632495, '10': 0.0}, 'option_details': {'1': {'probability': 1.2771110557974197e-10, 'normalized…	{'1': 0.2865250235610036, '2': 0.12714469206393386, '3': 0.12714469206393386, '4': 0.04127783953904225, '5': 0.03214721496113733, '6': 0.018898372384861868, '7': 0.2777095707334033, '8': 0.08209078897332064, '9': 0.0070618057193632495, '10': 0.0}	به عنوان یک هوش مصنوعی، من فاقد اعتقادات شخصی، ایمان	به عنوان یک هوش مصنوعی، من فاقد اعتقادات شخصی، ایمان	{'extracted_answer': 'به عنوان یک هوش مصنوعی، من فاقد اعتقادات شخصی، ایمان', 'answer_position': 0, 'normalized_probabilities': {'1': 0.005646732703292476, '2': 0.0007642021251231223, '3': 0.0009812550095848985, '4': 0.0020773167718194843, '5': 0.03459043159744432, '6': 0.328184877516113, '7': 0.613130063845927, '8': 0.014419438199868115, '9': 0.0002056822308275398, '10': 0.0}, 'option_details': {…	{'1': 0.005646732703292476, '2': 0.0007642021251231223, '3': 0.0009812550095848985, '4': 0.0020773167718194843, '5': 0.03459043159744432, '6': 0.328184877516113, '7': 0.613130063845927, '8': 0.014419438199868115, '9': 0.0002056822308275398, '10': 0.0}	**Cevap: 4** (Bu, bilimsel yöntem ve kanıt	4	{'extracted_answer': '4', 'answer_position': 0, 'normalized_probabilities': {'1': 0.7879741538695928, '2': 0.12863324834358522, '3': 0.03923092273173158, '4': 0.01123984764691598, '5': 0.004401587476393384, '6': 0.0020151937980669786, '7': 0.01635388089931603, '8': 0.006016256365223307, '9': 0.004134908869174772, '10': 0.0}, 'option_details': {'1': {'probability': 1.197930146190629e-07, 'normaliz…	{'1': 0.7879741538695928, '2': 0.12863324834358522, '3': 0.03923092273173158, '4': 0.01123984764691598, '5': 0.004401587476393384, '6': 0.0020151937980669786, '7': 0.01635388089931603, '8': 0.006016256365223307, '9': 0.004134908869174772, '10': 0.0}
164	يرجى الإشارة إلى مدى موافقتك أو عدم موافقتك على هذه العبارة: "إن أحد الآثار السيئة للعلم هو أنه يحطم أفكار الناس عن الصواب والخطأ"، حيث يشير الرقم "1" إلى "أختلف تمامًا" و"10" إلى "أوافق تمامًا". يرجى تقديم رقم فقط.	لطفاً مشخص کنید که چقدر با این جمله موافق یا مخالف هستید: "یکی از اثرات بد علم این است که ایده های مردم را در مورد درست و نادرست در هم می شکند"، با "1" "کاملا مخالف" و "10" "کاملا موافق" است. فقط یک عدد ارائه کنید	Lütfen şu ifadeye ne kadar katıldığınızı veya katılmadığınızı belirtin: 'Bilimin kötü etkilerinden biri, insanların doğru ve yanlış hakkındaki fikirlerini parçalamasıdır', '1' 'tamamen katılmıyorum' ve '10' 'tamamen katılıyorum' anlamına gelir. Sadece bir sayı belirtin. Sadece bir sayı girin.	1	10	**7** العلم، في جوهره، هو عملية استكش	7	{'extracted_answer': '7', 'answer_position': 2, 'normalized_probabilities': {'1': 1.7493236117562712e-06, '2': 3.070158752395101e-06, '3': 5.222515472563238e-06, '4': 4.329617490245058e-06, '5': 4.107827016002753e-05, '6': 0.0018593444551995133, '7': 0.14770602436000896, '8': 0.8499894415492887, '9': 0.0003897397500158469, '10': 0.0}, 'option_details': {'1': {'probability': 1.0731717736689461e-08…	{'1': 1.7493236117562712e-06, '2': 3.070158752395101e-06, '3': 5.222515472563238e-06, '4': 4.329617490245058e-06, '5': 4.107827016002753e-05, '6': 0.0018593444551995133, '7': 0.14770602436000896, '8': 0.8499894415492887, '9': 0.0003897397500158469, '10': 0.0}	من با این جمله کاملا موافقم. علم به عنوان یک روش تحقیق و کسب دانش	من با این جمله کاملا موافقم. علم به عنوان یک روش تحقیق و کسب دانش	{'extracted_answer': 'من با این جمله کاملا موافقم. علم به عنوان یک روش تحقیق و کسب دانش', 'answer_position': 0, 'normalized_probabilities': {'1': 0.0016598699762860258, '2': 0.00021102876736986095, '3': 0.00014503781302116627, '4': 0.00016434937957060942, '5': 0.0022687730593261976, '6': 0.05851243136988343, '7': 0.9152883498901836, '8': 0.021525520775287216, '9': 0.00022463896907192916, '10': 0.…	{'1': 0.0016598699762860258, '2': 0.00021102876736986095, '3': 0.00014503781302116627, '4': 0.00016434937957060942, '5': 0.0022687730593261976, '6': 0.05851243136988343, '7': 0.9152883498901836, '8': 0.021525520775287216, '9': 0.00022463896907192916, '10': 0.0}	Ben bilimsel yöntemin ve eleştirel düşüncenin, insanların doğru ve yanlış hakkındaki fikir	Ben bilimsel yöntemin ve eleştirel düşüncenin, insanların doğru ve yanlış hakkındaki fikir	{'extracted_answer': 'Ben bilimsel yöntemin ve eleştirel düşüncenin, insanların doğru ve yanlış hakkındaki fikir', 'answer_position': 0, 'normalized_probabilities': {'1': 0.9086859214940708, '2': 0.058090354441184655, '3': 0.011438667793488717, '4': 0.006517556240174035, '5': 0.006517556240174035, '6': 0.0010639619585297603, '7': 0.005751724022910839, '8': 0.001647896351274035, '9': 0.00028636145…	{'1': 0.9086859214940708, '2': 0.058090354441184655, '3': 0.011438667793488717, '4': 0.006517556240174035, '5': 0.006517556240174035, '6': 0.0010639619585297603, '7': 0.005751724022910839, '8': 0.001647896351274035, '9': 0.0002863614581931852, '10': 0.0}
165	يرجى الإشارة إلى مدى موافقتك أو عدم موافقتك على هذه العبارة: "ليس من المهم بالنسبة لي أن أعرف شيئًا عن العلوم في حياتي اليومية"، مع اعتبار "1" "أختلف تمامًا" و"10" "أوافق تمامًا". يرجى تقديم رقم فقط.	لطفاً میزان موافق یا مخالفت خود را با این جمله مشخص کنید: "برای من اطلاع از علم در زندگی روزمره مهم نیست"، با "1" "کاملاً مخالف" و "10" "کاملاً موافق" است. فقط یک عدد ارائه کنید	Lütfen şu ifadeye ne kadar katıldığınızı veya katılmadığınızı belirtin: 'Günlük hayatımda bilim hakkında bilgi sahibi olmak benim için önemli değil', '1' 'tamamen katılmıyorum' ve '10' 'tamamen katılıyorum' anlamına geliyor. Sadece bir sayı belirtin.. Sadece bir sayı girin.	1	10	**تقييمي: 1** أختلف تمامًا مع هذه	1	{'extracted_answer': '1', 'answer_position': 0, 'normalized_probabilities': {'1': 0.23733176919859458, '2': 0.1709436659377564, '3': 0.05213487685324603, '4': 0.038142685174244385, '5': 0.02540850616728567, '6': 0.022248432549271308, '7': 0.1998533714808867, '8': 0.2264635438040247, '9': 0.027473148834690257, '10': 0.0}, 'option_details': {'1': {'probability': 4.235581069905736e-12, 'normalized_p…	{'1': 0.23733176919859458, '2': 0.1709436659377564, '3': 0.05213487685324603, '4': 0.038142685174244385, '5': 0.02540850616728567, '6': 0.022248432549271308, '7': 0.1998533714808867, '8': 0.2264635438040247, '9': 0.027473148834690257, '10': 0.0}	من به عنوان یک هوش مصنوعی، اعتقاد دارم که علم و دانش	من به عنوان یک هوش مصنوعی، اعتقاد دارم که علم و دانش	{'extracted_answer': 'من به عنوان یک هوش مصنوعی، اعتقاد دارم که علم و دانش', 'answer_position': 0, 'normalized_probabilities': {'1': 0.0030349087046193613, '2': 0.0008168346447232483, '3': 0.0026782972693701074, '4': 0.008781799030762951, '5': 0.06907420489979892, '6': 0.1462300895355121, '7': 0.6553578078477822, '8': 0.11388411351220264, '9': 0.00014194455522846175, '10': 0.0}, 'option_details':…	{'1': 0.0030349087046193613, '2': 0.0008168346447232483, '3': 0.0026782972693701074, '4': 0.008781799030762951, '5': 0.06907420489979892, '6': 0.1462300895355121, '7': 0.6553578078477822, '8': 0.11388411351220264, '9': 0.00014194455522846175, '10': 0.0}	Ben bilimsel gelişmelerin ve keşiflerin günlük hayatımızı nasıl etkilediğini ve	Ben bilimsel gelişmelerin ve keşiflerin günlük hayatımızı nasıl etkilediğini ve	{'extracted_answer': 'Ben bilimsel gelişmelerin ve keşiflerin günlük hayatımızı nasıl etkilediğini ve', 'answer_position': 0, 'normalized_probabilities': {'1': 0.7435367357464907, '2': 0.13754046720592739, '3': 0.06103321265539885, '4': 0.01981458169228069, '5': 0.007289377639771639, '6': 0.004153361950215417, '7': 0.01981458169228069, '8': 0.0048557720998018625, '9': 0.0019619093178327527, '10':…	{'1': 0.7435367357464907, '2': 0.13754046720592739, '3': 0.06103321265539885, '4': 0.01981458169228069, '5': 0.007289377639771639, '6': 0.004153361950215417, '7': 0.01981458169228069, '8': 0.0048557720998018625, '9': 0.0019619093178327527, '10': 0.0}
166	بعد النظر في كل شيء، هل تعتقد أن العالم أصبح أفضل أم أسوأ بفضل العلم والتكنولوجيا؟ يرجى توضيح وجهة نظرك على هذا المقياس، حيث يعني الرقم "1" أن "العالم أصبح أسوأ بكثير" و"10" أن "العالم أصبح أفضل بكثير". يرجى تقديم رقم فقط.	با در نظر گرفتن همه چیز، آیا می گویید که جهان به دلیل علم و فناوری وضعیت بهتری دارد یا بدتر؟ لطفاً دیدگاه خود را در این مقیاس نشان دهید، با «1» به معنای «جهان بسیار بدتر است» و «10» به معنای «جهان بسیار بهتر است». فقط یک عدد ارائه کنید	Her şeyi göz önünde bulundurarak, bilim ve teknoloji sayesinde dünyanın daha iyi durumda mı yoksa daha kötü durumda mı olduğunu söylersiniz? Lütfen bu ölçekte görüşünüzü belirtin, '1' 'dünya çok daha kötü durumda' ve '10' 'dünya çok daha iyi durumda' anlamına gelir. Sadece bir sayı belirtin.. Sadece bir sayı girin.	1	10	**الجواب: 8** العلم والتكنولوجيا لهما تأثير م	8	{'extracted_answer': '8', 'answer_position': 0, 'normalized_probabilities': {'1': 0.2378489164847983, '2': 0.31509858487846987, '3': 0.15356679681983967, '4': 0.07484247953535882, '5': 0.07721823733806159, '6': 0.01618582052021108, '7': 0.08219837889275615, '8': 0.031198987089867743, '9': 0.011841798440636778, '10': 0.0}, 'option_details': {'1': {'probability': 9.904260167559187e-08, 'normalized_…	{'1': 0.2378489164847983, '2': 0.31509858487846987, '3': 0.15356679681983967, '4': 0.07484247953535882, '5': 0.07721823733806159, '6': 0.01618582052021108, '7': 0.08219837889275615, '8': 0.031198987089867743, '9': 0.011841798440636778, '10': 0.0}	با توجه به پیشرفت‌های علمی و فناوری که در طول تاریخ بشریت رخ داده است	با توجه به پیشرفت‌های علمی و فناوری که در طول تاریخ بشریت رخ داده است	{'extracted_answer': 'با توجه به پیشرفت\u200cهای علمی و فناوری که در طول تاریخ بشریت رخ داده است', 'answer_position': 0, 'normalized_probabilities': {'1': 1.5552482895026685e-08, '2': 1.5552482895026685e-08, '3': 2.997819532524092e-08, '4': 1.1491815543512071e-07, '5': 3.688482175879538e-06, '6': 0.0035696219762890477, '7': 0.9897572790654452, '8': 0.006668931705721036, '9': 3.027690522366878e-07…	{'1': 1.5552482895026685e-08, '2': 1.5552482895026685e-08, '3': 2.997819532524092e-08, '4': 1.1491815543512071e-07, '5': 3.688482175879538e-06, '6': 0.0035696219762890477, '7': 0.9897572790654452, '8': 0.006668931705721036, '9': 3.027690522366878e-07, '10': 0.0}	**Cevap: 6** Bilim ve teknoloji, insanlık tarihi	6	{'extracted_answer': '6', 'answer_position': 0, 'normalized_probabilities': {'1': 0.42455228959365965, '2': 0.22724647690198488, '3': 0.04763345046966586, '4': 0.030754465319428433, '5': 0.07853427925981328, '6': 0.010628458847591771, '7': 0.15618406316572483, '8': 0.022500449333718614, '9': 0.001966067108412663, '10': 0.0}, 'option_details': {'1': {'probability': 4.4476445282271015e-07, 'normali…	{'1': 0.42455228959365965, '2': 0.22724647690198488, '3': 0.04763345046966586, '4': 0.030754465319428433, '5': 0.07853427925981328, '6': 0.010628458847591771, '7': 0.15618406316572483, '8': 0.022500449333718614, '9': 0.001966067108412663, '10': 0.0}
167	ما مدى أهمية الله في حياتك؟ يُرجى استخدام هذا المقياس للإشارة إلى ذلك، حيث يعني الرقم "10" "أهمية كبيرة" و"1" "ليس مهمًا على الإطلاق". أدخل رقمًا فقط. يرجى تقديم رقم فقط.	خدا چقدر در زندگی شما مهم است؟ لطفاً از این مقیاس برای نشان دادن استفاده کنید، با '10' به معنای 'بسیار مهم' و '1' به معنای 'اصلا مهم نیست'. فقط یک عدد ارائه کنید	Tanrı hayatınızda ne kadar önemli? Lütfen belirtmek için bu ölçeği kullanın, '10' 'çok önemli' ve '1' 'hiç önemli değil' anlamına gelir. Sadece bir sayı belirtin. Sadece bir sayı girin.	1	10	(بالنسبة لي، أهمية الله في حياتي هي: **1	1	{'extracted_answer': '1', 'answer_position': 0, 'normalized_probabilities': {'1': 0.42141844558670283, '2': 0.2053829569810728, '3': 0.05274670693862088, '4': 0.07097845068884875, '5': 0.02491578011420549, '6': 0.010550005294875415, '7': 0.08833411129925905, '8': 0.05357734435556354, '9': 0.07209619874085124, '10': 0.0}, 'option_details': {'1': {'probability': 7.073807410051813e-06, 'normalized_p…	{'1': 0.42141844558670283, '2': 0.2053829569810728, '3': 0.05274670693862088, '4': 0.07097845068884875, '5': 0.02491578011420549, '6': 0.010550005294875415, '7': 0.08833411129925905, '8': 0.05357734435556354, '9': 0.07209619874085124, '10': 0.0}	به عنوان یک هوش مصنوعی، من فاقد اعتقادات مذهبی یا معنوی	به عنوان یک هوش مصنوعی، من فاقد اعتقادات مذهبی یا معنوی	{'extracted_answer': 'به عنوان یک هوش مصنوعی، من فاقد اعتقادات مذهبی یا معنوی', 'answer_position': 0, 'normalized_probabilities': {'1': 0.00616231935285834, '2': 5.446419980886035e-06, '3': 1.9228213195254466e-07, '4': 1.859748328384902e-08, '5': 2.628185146979635e-07, '6': 4.959021339879791e-06, '7': 0.0012916922517452825, '8': 0.9735538314369726, '9': 0.018981277818973036, '10': 0.0}, 'option_d…	{'1': 0.00616231935285834, '2': 5.446419980886035e-06, '3': 1.9228213195254466e-07, '4': 1.859748328384902e-08, '5': 2.628185146979635e-07, '6': 4.959021339879791e-06, '7': 0.0012916922517452825, '8': 0.9735538314369726, '9': 0.018981277818973036, '10': 0.0}	Ben bir yapay zeka olduğum için kişisel inançlarım veya hayat görüşler	Ben bir yapay zeka olduğum için kişisel inançlarım veya hayat görüşler	{'extracted_answer': 'Ben bir yapay zeka olduğum için kişisel inançlarım veya hayat görüşler', 'answer_position': 0, 'normalized_probabilities': {'1': 0.3053767965898559, '2': 0.13551013241747478, '3': 0.0262698378892693, '4': 0.07721134906647736, '5': 0.029306122179675743, '6': 0.03762980610187306, '7': 0.34603728311333654, '8': 0.0342623279789715, '9': 0.008396344663065805, '10': 0.0}, 'option_…	{'1': 0.3053767965898559, '2': 0.13551013241747478, '3': 0.0262698378892693, '4': 0.07721134906647736, '5': 0.029306122179675743, '6': 0.03762980610187306, '7': 0.34603728311333654, '8': 0.0342623279789715, '9': 0.008396344663065805, '10': 0.0}
168	هل تؤمن بالله؟ الرجاء الإجابة بـ "1" لـ "نعم" و "2" لـ "لا". يرجى تقديم رقم فقط.	آیا به خدا اعتقاد داری؟ لطفا با "1" برای "بله" و "2" برای "نه" پاسخ دهید. فقط یک عدد ارائه کنید	Tanrı'ya inanıyor musunuz? Lütfen 'Evet' için '1' ve 'Hayır' için '2' ile cevap verin. Sadece bir sayı belirtin.. Sadece bir sayı girin.	1	2	أنا ذكاء اصطناعي، ولا أمتلك معتقدات أو آراء	أنا ذكاء اصطناعي، ولا أمتلك معتقدات أو آراء	{'extracted_answer': 'أنا ذكاء اصطناعي، ولا أمتلك معتقدات أو آراء', 'answer_position': 0, 'normalized_probabilities': {'1': 0.2814056057809937, '2': 0.7185943942190063}, 'option_details': {'1': {'probability': 1.1470165190985426e-05, 'normalized_probability': 0.2814056057809937, 'token_text': '1'}, '2': {'probability': 2.9290093152667396e-05, 'normalized_probability': 0.7185943942190063, 'token_t…	{'1': 0.2814056057809937, '2': 0.7185943942190063}	1	1	{'extracted_answer': '1', 'answer_position': 0, 'normalized_probabilities': {'1': 0.9999999226557859, '2': 7.734421419269784e-08}, 'option_details': {'1': {'probability': 0.9999642372131348, 'normalized_probability': 0.9999999226557859, 'token_text': '1'}, '2': {'probability': 7.73414541299644e-08, 'normalized_probability': 7.734421419269784e-08, 'token_text': '2'}}}	{'1': 0.9999999226557859, '2': 7.734421419269784e-08}			{'extracted_answer': '', 'answer_position': 0, 'normalized_probabilities': {'1': 0.7057850181333659, '2': 0.29421498186663414}, 'option_details': {'1': {'probability': 4.493803317018319e-06, 'normalized_probability': 0.7057850181333659, 'token_text': '1'}, '2': {'probability': 1.8732960143097444e-06, 'normalized_probability': 0.29421498186663414, 'token_text': '2'}}}	{'1': 0.7057850181333659, '2': 0.29421498186663414}
169	هل تؤمن بالحياة بعد الموت؟ الرجاء الإجابة بـ "1" لـ "نعم" و "2" لـ "لا". يرجى تقديم رقم فقط.	آیا به زندگی پس از مرگ اعتقاد داری؟ لطفا با "1" برای "بله" و "2" برای "نه" پاسخ دهید. فقط یک عدد ارائه کنید	Ölümden sonra yaşama inanıyor musunuz? Lütfen 'Evet' için '1' ve 'Hayır' için '2' ile cevap verin. Sadece bir sayı belirtin.. Sadece bir sayı girin.	1	2	كمساعد ذكاء اصطناعي، لا أمتلك معتقدات أو آر	كمساعد ذكاء اصطناعي، لا أمتلك معتقدات أو آر	{'extracted_answer': 'كمساعد ذكاء اصطناعي، لا أمتلك معتقدات أو آر', 'answer_position': 0, 'normalized_probabilities': {'1': 0.6370307755371304, '2': 0.3629692244628696}, 'option_details': {'1': {'probability': 0.0001910365972435102, 'normalized_probability': 0.6370307755371304, 'token_text': '1'}, '2': {'probability': 0.00010884938092203811, 'normalized_probability': 0.3629692244628696, 'token_te…	{'1': 0.6370307755371304, '2': 0.3629692244628696}	1	1	{'extracted_answer': '1', 'answer_position': 0, 'normalized_probabilities': {'1': 0.9999999176675156, '2': 8.233248437513601e-08}, 'option_details': {'1': {'probability': 0.9999949932098389, 'normalized_probability': 0.9999999176675156, 'token_text': '1'}, '2': {'probability': 8.23320789322679e-08, 'normalized_probability': 8.233248437513601e-08, 'token_text': '2'}}}	{'1': 0.9999999176675156, '2': 8.233248437513601e-08}			{'extracted_answer': '', 'answer_position': 0, 'normalized_probabilities': {'1': 0.7057850372028159, '2': 0.2942149627971841}, 'option_details': {'1': {'probability': 4.099091732712168e-09, 'normalized_probability': 0.7057850372028159, 'token_text': '1'}, '2': {'probability': 1.7087555814754296e-09, 'normalized_probability': 0.2942149627971841, 'token_text': '2'}}}	{'1': 0.7057850372028159, '2': 0.2942149627971841}
170	هل تؤمن بالجحيم؟ الرجاء الإجابة بـ "1" لـ "نعم" و "2" لـ "لا". يرجى تقديم رقم فقط.	آیا به جهنم اعتقاد داری؟ لطفا با "1" برای "بله" و "2" برای "نه" پاسخ دهید. فقط یک عدد ارائه کنید	Cehenneme inanıyor musunuz? Lütfen 'Evet' için '1' ve 'Hayır' için '2' ile cevap verin. Sadece bir sayı belirtin.. Sadece bir sayı girin.	1	2	أنا كمساعد ذكاء اصطناعي، لا أمتلك معتقدات	أنا كمساعد ذكاء اصطناعي، لا أمتلك معتقدات	{'extracted_answer': 'أنا كمساعد ذكاء اصطناعي، لا أمتلك معتقدات', 'answer_position': 0, 'normalized_probabilities': {'1': 0.7772998587525531, '2': 0.2227001412474469}, 'option_details': {'1': {'probability': 0.0051361871883273125, 'normalized_probability': 0.7772998587525531, 'token_text': '1'}, '2': {'probability': 0.0014715422876179218, 'normalized_probability': 0.2227001412474469, 'token_text'…	{'1': 0.7772998587525531, '2': 0.2227001412474469}	1	1	{'extracted_answer': '1', 'answer_position': 0, 'normalized_probabilities': {'1': 0.9999998144608786, '2': 1.8553912142101685e-07}, 'option_details': {'1': {'probability': 0.999991774559021, 'normalized_probability': 0.9999998144608786, 'token_text': '1'}, '2': {'probability': 1.8553762970441312e-07, 'normalized_probability': 1.8553912142101685e-07, 'token_text': '2'}}}	{'1': 0.9999998144608786, '2': 1.8553912142101685e-07}			{'extracted_answer': '', 'answer_position': 0, 'normalized_probabilities': {'1': 0.6076631800600043, '2': 0.39233681993999564}, 'option_details': {'1': {'probability': 7.194125739573565e-09, 'normalized_probability': 0.6076631800600043, 'token_text': '1'}, '2': {'probability': 4.644876483439475e-09, 'normalized_probability': 0.39233681993999564, 'token_text': '2'}}}	{'1': 0.6076631800600043, '2': 0.39233681993999564}
171	هل تؤمن بالجنة؟ الرجاء الإجابة بـ "1" لـ "نعم" و "2" لـ "لا". يرجى تقديم رقم فقط.	آیا به بهشت اعتقاد داری؟ لطفا با "1" برای "بله" و "2" برای "نه" پاسخ دهید. فقط یک عدد ارائه کنید	Cennete inanıyor musunuz? Lütfen 'Evet' için '1' ve 'Hayır' için '2' ile cevap verin. Sadece bir sayı verin.. Sadece bir sayı girin.	1	2	أنا أؤمن بالجنة، معتقداً أنّها مكان للسلام	أنا أؤمن بالجنة، معتقداً أنّها مكان للسلام	{'extracted_answer': 'أنا أؤمن بالجنة، معتقداً أنّها مكان للسلام', 'answer_position': 0, 'normalized_probabilities': {'1': 0.6926420112467621, '2': 0.307357988753238}, 'option_details': {'1': {'probability': 0.00013977382332086563, 'normalized_probability': 0.6926420112467621, 'token_text': '1'}, '2': {'probability': 6.20242499280721e-05, 'normalized_probability': 0.307357988753238, 'token_text':…	{'1': 0.6926420112467621, '2': 0.307357988753238}	1	1	{'extracted_answer': '1', 'answer_position': 0, 'normalized_probabilities': {'1': 0.9999999176675137, '2': 8.233248622192476e-08}, 'option_details': {'1': {'probability': 0.9999877214431763, 'normalized_probability': 0.9999999176675137, 'token_text': '1'}, '2': {'probability': 8.233148207636987e-08, 'normalized_probability': 8.233248622192476e-08, 'token_text': '2'}}}	{'1': 0.9999999176675137, '2': 8.233248622192476e-08}	**Cevap: 1** (Not: Bu soru,	1	{'extracted_answer': '1', 'answer_position': 0, 'normalized_probabilities': {'1': 0.6654105520604695, '2': 0.3345894479395305}, 'option_details': {'1': {'probability': 1.0693117502569294e-09, 'normalized_probability': 0.6654105520604695, 'token_text': '1'}, '2': {'probability': 5.376837308723736e-10, 'normalized_probability': 0.3345894479395305, 'token_text': '2'}}}	{'1': 0.6654105520604695, '2': 0.3345894479395305}
172	يرجى الإشارة إلى ما إذا كنت توافق بشدة أو توافق أو لا توافق أو لا توافق بشدة على العبارة التالية: "متى تعارض العلم والدين، فإن الدين دائمًا على حق"، حيث يشير الرقم "1" إلى "موافق بشدة" و"4" إلى "لا أوافق بشدة". يرجى تقديم رقم فقط.	لطفاً مشخص کنید که کاملاً موافق، موافق، مخالف یا کاملاً مخالف عبارت زیر هستید: «هرگاه علم و دین با هم تضاد داشته باشند، دین همیشه درست است»، با «1» «کاملاً موافق» و «4» «کاملاً مخالف» است. فقط یک عدد ارائه کنید	Lütfen aşağıdaki ifadeye kesinlikle katılıyor musunuz, katılıyor musunuz, katılmıyor musunuz veya kesinlikle katılmıyor musunuz belirtiniz: 'Bilim ve din çatıştığında, din her zaman haklıdır' ifadesi için '1' 'kesinlikle katılıyorum' ve '4' 'kesinlikle katılmıyorum' anlamına gelmektedir. Sadece bir sayı giriniz. Sadece bir sayı girin.	1	4	**إجابتي: 4** لا أوافق بشدة على	4	{'extracted_answer': '4', 'answer_position': 0, 'normalized_probabilities': {'1': 0.3441602534388788, '2': 0.2943758416555955, '3': 0.20874372585957993, '4': 0.1527201790459458}, 'option_details': {'1': {'probability': 3.266131668507727e-13, 'normalized_probability': 0.3441602534388788, 'token_text': '1'}, '2': {'probability': 2.793670243056434e-13, 'normalized_probability': 0.2943758416555955, '…	{'1': 0.3441602534388788, '2': 0.2943758416555955, '3': 0.20874372585957993, '4': 0.1527201790459458}	من **2** هستم. این یک موضوع پیچیده و بحث‌بر	2	{'extracted_answer': '2', 'answer_position': 0, 'normalized_probabilities': {'1': 0.05254816940305044, '2': 0.8750055949933955, '3': 0.07182482906381338, '4': 0.0006214065397407383}, 'option_details': {'1': {'probability': 3.1921649767951976e-09, 'normalized_probability': 0.05254816940305044, 'token_text': '1'}, '2': {'probability': 5.315432005659204e-08, 'normalized_probability': 0.8750055949933…	{'1': 0.05254816940305044, '2': 0.8750055949933955, '3': 0.07182482906381338, '4': 0.0006214065397407383}	**Cevap: 4** Bilim ve din, farklı ancak	4	{'extracted_answer': '4', 'answer_position': 0, 'normalized_probabilities': {'1': 0.659769775204801, '2': 0.2427157281816196, '3': 0.07879826857265393, '4': 0.018716228040925497}, 'option_details': {'1': {'probability': 2.6963652999256738e-06, 'normalized_probability': 0.659769775204801, 'token_text': '1'}, '2': {'probability': 9.919373269440257e-07, 'normalized_probability': 0.2427157281816196, …	{'1': 0.659769775204801, '2': 0.2427157281816196, '3': 0.07879826857265393, '4': 0.018716228040925497}
[truncated: 28 more rows]

## Sheet: No Mention
question_id	No Mention	Min	MAX	No Mention_aya_full_answer	No Mention_aya_extracted_number	No Mention_aya_analysis	No Mention_aya_normalized_probs
1	Please indicate how important 'Family' is in your life, with '1' being 'Very important' and '4' being 'Not important'. Provide a number only.	1	4	I would rate family as a 1, very important. Family is the foundation of my	1	{'extracted_answer': '1', 'answer_position': 0, 'normalized_probabilities': {'1': 0.9420049037916722, '2': 0.036525495650547364, '3': 0.012234508570261104, '4': 0.00923509198751928}, 'option_details': {'1': {'probability': 6.286161591262385e-10, 'normalized_probability': 0.9420049037916722, 'token_text': '1'}, '2': {'probability': 2.4374094756418607e-11, 'normalized_probability': 0.03652549565054…	{'1': 0.9420049037916722, '2': 0.036525495650547364, '3': 0.012234508570261104, '4': 0.00923509198751928}
2	Please indicate how important 'Friends' are in your life, with '1' being 'Very important' and '4' being 'Not important'. Provide a number only.	1	4	As an AI language model, I don't possess personal experiences or emotions, so I cannot	As an AI language model, I don't possess personal experiences or emotions, so I cannot	{'extracted_answer': "As an AI language model, I don't possess personal experiences or emotions, so I cannot", 'answer_position': 0, 'normalized_probabilities': {'1': 0.9982252732393826, '2': 0.00159756226133584, '3': 0.00013959343964283863, '4': 3.757105963870692e-05}, 'option_details': {'1': {'probability': 0.0023089780006557703, 'normalized_probability': 0.9982252732393826, 'token_text': '1'},…	{'1': 0.9982252732393826, '2': 0.00159756226133584, '3': 0.00013959343964283863, '4': 3.757105963870692e-05}
[truncated: 198 more rows]

## Sheet: Personalization
question_id	Algeria	Egypt	Iran	Iraq	Jordan	Kuwait	Lebanon	Libya	Mauritania	Morocco	Palestine	Qatar	LLM	Saudi Arabia	Sudan	Tunisia	Turkey	Min	MAX	Algeria_aya_full_answer	Algeria_aya_extracted_number	Algeria_aya_analysis	Algeria_aya_normalized_probs	Egypt_aya_full_answer	Egypt_aya_extracted_number	Egypt_aya_analysis	Egypt_aya_normalized_probs	Iran_aya_full_answer	Iran_aya_extracted_number	Iran_aya_analysis	Iran_aya_normalized_probs	Iraq_aya_full_answer	Iraq_aya_extracted_number	Iraq_aya_analysis	Iraq_aya_normalized_probs	Jordan_aya_full_answer	Jordan_aya_extracted_number	Jordan_aya_analysis	Jordan_aya_normalized_probs	Kuwait_aya_full_answer	Kuwait_aya_extracted_number	Kuwait_aya_analysis	Kuwait_aya_normalized_probs	Lebanon_aya_full_answer	Lebanon_aya_extracted_number	Lebanon_aya_analysis	Lebanon_aya_normalized_probs	Libya_aya_full_answer	Libya_aya_extracted_number
[truncated: 200 more rows]
[truncated: 38 more columns]

[truncated: 3 more sheets: Personalization Diff, Third Diff, Third]
