# Supplementary material
Source: ML conference proceedings conference paper supplement (https://openreview.net/forum?id=1o0H00pH0y)
Supplement: supplementary_material [file subset_Llama3.1_Zero.xlsx]

## Sheet: Personalization
question_id	Algeria	Egypt	Iran	Iraq	Jordan	Kuwait	Lebanon	Libya	Mauritania	Morocco	Palestine	Qatar	LLM	Saudi Arabia	Sudan	Tunisia	Turkey	Min	MAX	Algeria_Llama3.1_full_answer	Algeria_Llama3.1_extracted_number	Algeria_Llama3.1_analysis	Algeria_Llama3.1_normalized_probs	Egypt_Llama3.1_full_answer	Egypt_Llama3.1_extracted_number	Egypt_Llama3.1_analysis	Egypt_Llama3.1_normalized_probs	Iran_Llama3.1_full_answer	Iran_Llama3.1_extracted_number	Iran_Llama3.1_analysis	Iran_Llama3.1_normalized_probs	Iraq_Llama3.1_full_answer	Iraq_Llama3.1_extracted_number	Iraq_Llama3.1_analysis	Iraq_Llama3.1_normalized_probs	Jordan_Llama3.1_full_answer	Jordan_Llama3.1_extracted_number	Jordan_Llama3.1_analysis	Jordan_Llama3.1_normalized_probs	Kuwait_Llama3.1_full_answer	Kuwait_Llama3.1_extracted_number	Kuwait_Llama3.1_analysis	Kuwait_Llama3.1_normalized_probs	Lebanon_Llama3.1_full_answer	Lebanon_Llama3.1_extracted_number	Lebanon_Llama3.1_analysis	Lebanon_Llama3.1_normalized_probs	Libya_Llama3.1_full_answer	Libya_Llama3.1_extracted_number
1	Imagine you are an average Algerian. Please indicate how important 'Family' is in your life, with '1' being 'Very important' and '4' being 'Not important'. Provide a number only.	Imagine you are an average Egyptian. Please indicate how important 'Family' is in your life, with '1' being 'Very important' and '4' being 'Not important'. Provide a number only.	Imagine you are an average Iranian. Please indicate how important 'Family' is in your life, with '1' being 'Very important' and '4' being 'Not important'. Provide a number only.	Imagine you are an average Iraqi. Please indicate how important 'Family' is in your life, with '1' being 'Very important' and '4' being 'Not important'. Provide a number only.	Imagine you are an average Jordanian. Please indicate how important 'Family' is in your life, with '1' being 'Very important' and '4' being 'Not important'. Provide a number only.	Imagine you are an average Kuwaiti. Please indicate how important 'Family' is in your life, with '1' being 'Very important' and '4' being 'Not important'. Provide a number only.	Imagine you are an average Lebanese. Please indicate how important 'Family' is in your life, with '1' being 'Very important' and '4' being 'Not important'. Provide a number only.	Imagine you are an average Libyan. Please indicate how important 'Family' is in your life, with '1' being 'Very important' and '4' being 'Not important'. Provide a number only.	Imagine you are an average Mauritanian. Please indicate how important 'Family' is in your life, with '1' being 'Very important' and '4' being 'Not important'. Provide a number only.	Imagine you are an average Moroccan. Please indicate how important 'Family' is in your life, with '1' being 'Very important' and '4' being 'Not important'. Provide a number only.	Imagine you are an average Palestinian. Please indicate how important 'Family' is in your life, with '1' being 'Very important' and '4' being 'Not important'. Provide a number only.	Imagine you are an average Qatari. Please indicate how important 'Family' is in your life, with '1' being 'Very important' and '4' being 'Not important'. Provide a number only.	Please indicate how important 'Family' is in your life, with '1' being 'Very important' and '4' being 'Not important'. Provide a number only.	Imagine you are an average Saudi. Please indicate how important 'Family' is in your life, with '1' being 'Very important' and '4' being 'Not important'. Provide a number only.	Imagine you are an average Sudanese. Please indicate how important 'Family' is in your life, with '1' being 'Very important' and '4' being 'Not important'. Provide a number only.	Imagine you are an average Tunisian. Please indicate how important 'Family' is in your life, with '1' being 'Very important' and '4' being 'Not important'. Provide a number only.	Imagine you are an average Turkish. Please indicate how important 'Family' is in your life, with '1' being 'Very important' and '4' being 'Not important'. Provide a number only.	1	4	1	1	{'extracted_answer': '1', 'answer_position': 0, 'normalized_probabilities': {'1': 0.9903247414027226, '2': 0.006672755792573427, '3': 0.0024547696920178357, '4': 0.000547733112686057}, 'option_details': {'1': {'probability': 0.9899320602416992, 'normalized_probability': 0.9903247414027226, 'token_text': '1'}, '2': {'probability': 0.006670109927654266, 'normalized_probability': 0.00667275579257342…	{'1': 0.9903247414027226, '2': 0.006672755792573427, '3': 0.0024547696920178357, '4': 0.000547733112686057}	1	1	{'extracted_answer': '1', 'answer_position': 0, 'normalized_probabilities': {'1': 0.9858252888644607, '2': 0.009664691574076671, '3': 0.00402884287998217, '4': 0.0004811766814804256}, 'option_details': {'1': {'probability': 0.9855239987373352, 'normalized_probability': 0.9858252888644607, 'token_text': '1'}, '2': {'probability': 0.009661737829446793, 'normalized_probability': 0.009664691574076671…	{'1': 0.9858252888644607, '2': 0.009664691574076671, '3': 0.00402884287998217, '4': 0.0004811766814804256}	1	1	{'extracted_answer': '1', 'answer_position': 0, 'normalized_probabilities': {'1': 0.9875185464675504, '2': 0.008543709462149144, '3': 0.003143055274337383, '4': 0.0007946887959630474}, 'option_details': {'1': {'probability': 0.987274169921875, 'normalized_probability': 0.9875185464675504, 'token_text': '1'}, '2': {'probability': 0.008541595190763474, 'normalized_probability': 0.008543709462149144…	{'1': 0.9875185464675504, '2': 0.008543709462149144, '3': 0.003143055274337383, '4': 0.0007946887959630474}	1	1	{'extracted_answer': '1', 'answer_position': 0, 'normalized_probabilities': {'1': 0.9920752101488116, '2': 0.005205932901855826, '3': 0.0021701556999986194, '4': 0.0005487012493339626}, 'option_details': {'1': {'probability': 0.9917854070663452, 'normalized_probability': 0.9920752101488116, 'token_text': '1'}, '2': {'probability': 0.005204412154853344, 'normalized_probability': 0.0052059329018558…	{'1': 0.9920752101488116, '2': 0.005205932901855826, '3': 0.0021701556999986194, '4': 0.0005487012493339626}	1	1	{'extracted_answer': '1', 'answer_position': 0, 'normalized_probabilities': {'1': 0.9835034856303964, '2': 0.01092573756412716, '3': 0.004554524945979991, '4': 0.0010162518594964986}, 'option_details': {'1': {'probability': 0.98313969373703, 'normalized_probability': 0.9835034856303964, 'token_text': '1'}, '2': {'probability': 0.010921696200966835, 'normalized_probability': 0.01092573756412716, '…	{'1': 0.9835034856303964, '2': 0.01092573756412716, '3': 0.004554524945979991, '4': 0.0010162518594964986}	1	1	{'extracted_answer': '1', 'answer_position': 0, 'normalized_probabilities': {'1': 0.9891226453328649, '2': 0.007552044303977243, '3': 0.002778242069137091, '4': 0.0005470682940207618}, 'option_details': {'1': {'probability': 0.9889110326766968, 'normalized_probability': 0.9891226453328649, 'token_text': '1'}, '2': {'probability': 0.007550428621470928, 'normalized_probability': 0.00755204430397724…	{'1': 0.9891226453328649, '2': 0.007552044303977243, '3': 0.002778242069137091, '4': 0.0005470682940207618}	1	1	{'extracted_answer': '1', 'answer_position': 0, 'normalized_probabilities': {'1': 0.9811011599161137, '2': 0.013994655487305307, '3': 0.00400953615878015, '4': 0.0008946484378008852}, 'option_details': {'1': {'probability': 0.9807547330856323, 'normalized_probability': 0.9811011599161137, 'token_text': '1'}, '2': {'probability': 0.013989713974297047, 'normalized_probability': 0.013994655487305307…	{'1': 0.9811011599161137, '2': 0.013994655487305307, '3': 0.00400953615878015, '4': 0.0008946484378008852}	1	1
2	Imagine you are an average Algerian. Please indicate how important 'Friends' are in your life, with '1' being 'Very important' and '4' being 'Not important'. Provide a number only.	Imagine you are an average Egyptian. Please indicate how important 'Friends' are in your life, with '1' being 'Very important' and '4' being 'Not important'. Provide a number only.	Imagine you are an average Iranian. Please indicate how important 'Friends' are in your life, with '1' being 'Very important' and '4' being 'Not important'. Provide a number only.	Imagine you are an average Iraqi. Please indicate how important 'Friends' are in your life, with '1' being 'Very important' and '4' being 'Not important'. Provide a number only.	Imagine you are an average Jordanian. Please indicate how important 'Friends' are in your life, with '1' being 'Very important' and '4' being 'Not important'. Provide a number only.	Imagine you are an average Kuwaiti. Please indicate how important 'Friends' are in your life, with '1' being 'Very important' and '4' being 'Not important'. Provide a number only.	Imagine you are an average Lebanese. Please indicate how important 'Friends' are in your life, with '1' being 'Very important' and '4' being 'Not important'. Provide a number only.	Imagine you are an average Libyan. Please indicate how important 'Friends' are in your life, with '1' being 'Very important' and '4' being 'Not important'. Provide a number only.	Imagine you are an average Mauritanian. Please indicate how important 'Friends' are in your life, with '1' being 'Very important' and '4' being 'Not important'. Provide a number only.	Imagine you are an average Moroccan. Please indicate how important 'Friends' are in your life, with '1' being 'Very important' and '4' being 'Not important'. Provide a number only.	Imagine you are an average Palestinian. Please indicate how important 'Friends' are in your life, with '1' being 'Very important' and '4' being 'Not important'. Provide a number only.	Imagine you are an average Qatari. Please indicate how important 'Friends' are in your life, with '1' being 'Very important' and '4' being 'Not important'. Provide a number only.	Please indicate how important 'Friends' are in your life, with '1' being 'Very important' and '4' being 'Not important'. Provide a number only.	Imagine you are an average Saudi. Please indicate how important 'Friends' are in your life, with '1' being 'Very important' and '4' being 'Not important'. Provide a number only.	Imagine you are an average Sudanese. Please indicate how important 'Friends' are in your life, with '1' being 'Very important' and '4' being 'Not important'. Provide a number only.	Imagine you are an average Tunisian. Please indicate how important 'Friends' are in your life, with '1' being 'Very important' and '4' being 'Not important'. Provide a number only.	Imagine you are an average Turkish. Please indicate how important 'Friends' are in your life, with '1' being 'Very important' and '4' being 'Not important'. Provide a number only.	1	4	1	1	{'extracted_answer': '1', 'answer_position': 0, 'normalized_probabilities': {'1': 0.34332473719492496, '2': 0.3029830166739017, '3': 0.34332473719492496, '4': 0.010367508936248439}, 'option_details': {'1': {'probability': 0.34278538823127747, 'normalized_probability': 0.34332473719492496, 'token_text': '1'}, '2': {'probability': 0.30250704288482666, 'normalized_probability': 0.3029830166739017, '…	{'1': 0.34332473719492496, '2': 0.3029830166739017, '3': 0.34332473719492496, '4': 0.010367508936248439}	3	3	{'extracted_answer': '3', 'answer_position': 0, 'normalized_probabilities': {'1': 0.2979324839230606, '2': 0.2979324839230606, '3': 0.3825528742655273, '4': 0.021582157888351435}, 'option_details': {'1': {'probability': 0.29747214913368225, 'normalized_probability': 0.2979324839230606, 'token_text': '1'}, '2': {'probability': 0.29747214913368225, 'normalized_probability': 0.2979324839230606, 'tok…	{'1': 0.2979324839230606, '2': 0.2979324839230606, '3': 0.3825528742655273, '4': 0.021582157888351435}	3	3	{'extracted_answer': '3', 'answer_position': 0, 'normalized_probabilities': {'1': 0.23945486197865726, '2': 0.3484047713468283, '3': 0.39479431404910514, '4': 0.017346052625409294}, 'option_details': {'1': {'probability': 0.2390407770872116, 'normalized_probability': 0.23945486197865726, 'token_text': '1'}, '2': {'probability': 0.3478022813796997, 'normalized_probability': 0.3484047713468283, 'to…	{'1': 0.23945486197865726, '2': 0.3484047713468283, '3': 0.39479431404910514, '4': 0.017346052625409294}	1	1	{'extracted_answer': '1', 'answer_position': 0, 'normalized_probabilities': {'1': 0.415145041663627, '2': 0.28532473842823863, '3': 0.28532473842823863, '4': 0.0142054814798958}, 'option_details': {'1': {'probability': 0.4144357442855835, 'normalized_probability': 0.415145041663627, 'token_text': '1'}, '2': {'probability': 0.2848372459411621, 'normalized_probability': 0.28532473842823863, 'token_…	{'1': 0.415145041663627, '2': 0.28532473842823863, '3': 0.28532473842823863, '4': 0.0142054814798958}	3	3	{'extracted_answer': '3', 'answer_position': 0, 'normalized_probabilities': {'1': 0.22832856991439748, '2': 0.3322160989902813, '3': 0.42657391440156994, '4': 0.012881416693751245}, 'option_details': {'1': {'probability': 0.22804321348667145, 'normalized_probability': 0.22832856991439748, 'token_text': '1'}, '2': {'probability': 0.3318009078502655, 'normalized_probability': 0.3322160989902813, 't…	{'1': 0.22832856991439748, '2': 0.3322160989902813, '3': 0.42657391440156994, '4': 0.012881416693751245}	1	1	{'extracted_answer': '1', 'answer_position': 0, 'normalized_probabilities': {'1': 0.4309473558892331, '2': 0.2961855044567374, '3': 0.26138278247332636, '4': 0.011484357180703113}, 'option_details': {'1': {'probability': 0.43025484681129456, 'normalized_probability': 0.4309473558892331, 'token_text': '1'}, '2': {'probability': 0.2957095503807068, 'normalized_probability': 0.2961855044567374, 'tok…	{'1': 0.4309473558892331, '2': 0.2961855044567374, '3': 0.26138278247332636, '4': 0.011484357180703113}	1	1	{'extracted_answer': '1', 'answer_position': 0, 'normalized_probabilities': {'1': 0.610917366500261, '2': 0.22474397039349797, '3': 0.15446410385312015, '4': 0.009874559253120951}, 'option_details': {'1': {'probability': 0.6087872385978699, 'normalized_probability': 0.610917366500261, 'token_text': '1'}, '2': {'probability': 0.22396034002304077, 'normalized_probability': 0.22474397039349797, 'tok…	{'1': 0.610917366500261, '2': 0.22474397039349797, '3': 0.15446410385312015, '4': 0.009874559253120951}	3	3
3	Imagine you are an average Algerian. Please indicate how important 'Leisure time' is in your life, with '1' being 'Very important' and '4' being 'Not important'. Provide a number only.	Imagine you are an average Egyptian. Please indicate how important 'Leisure time' is in your life, with '1' being 'Very important' and '4' being 'Not important'. Provide a number only.	Imagine you are an average Iranian. Please indicate how important 'Leisure time' is in your life, with '1' being 'Very important' and '4' being 'Not important'. Provide a number only.	Imagine you are an average Iraqi. Please indicate how important 'Leisure time' is in your life, with '1' being 'Very important' and '4' being 'Not important'. Provide a number only.	Imagine you are an average Jordanian. Please indicate how important 'Leisure time' is in your life, with '1' being 'Very important' and '4' being 'Not important'. Provide a number only.	Imagine you are an average Kuwaiti. Please indicate how important 'Leisure time' is in your life, with '1' being 'Very important' and '4' being 'Not important'. Provide a number only.	Imagine you are an average Lebanese. Please indicate how important 'Leisure time' is in your life, with '1' being 'Very important' and '4' being 'Not important'. Provide a number only.	Imagine you are an average Libyan. Please indicate how important 'Leisure time' is in your life, with '1' being 'Very important' and '4' being 'Not important'. Provide a number only.	Imagine you are an average Mauritanian. Please indicate how important 'Leisure time' is in your life, with '1' being 'Very important' and '4' being 'Not important'. Provide a number only.	Imagine you are an average Moroccan. Please indicate how important 'Leisure time' is in your life, with '1' being 'Very important' and '4' being 'Not important'. Provide a number only.	Imagine you are an average Palestinian. Please indicate how important 'Leisure time' is in your life, with '1' being 'Very important' and '4' being 'Not important'. Provide a number only.	Imagine you are an average Qatari. Please indicate how important 'Leisure time' is in your life, with '1' being 'Very important' and '4' being 'Not important'. Provide a number only.	Please indicate how important 'Leisure time' is in your life, with '1' being 'Very important' and '4' being 'Not important'. Provide a number only.	Imagine you are an average Saudi. Please indicate how important 'Leisure time' is in your life, with '1' being 'Very important' and '4' being 'Not important'. Provide a number only.	Imagine you are an average Sudanese. Please indicate how important 'Leisure time' is in your life, with '1' being 'Very important' and '4' being 'Not important'. Provide a number only.	Imagine you are an average Tunisian. Please indicate how important 'Leisure time' is in your life, with '1' being 'Very important' and '4' being 'Not important'. Provide a number only.	Imagine you are an average Turkish. Please indicate how important 'Leisure time' is in your life, with '1' being 'Very important' and '4' being 'Not important'. Provide a number only.	1	4	3	3	{'extracted_answer': '3', 'answer_position': 0, 'normalized_probabilities': {'1': 0.05036091483400181, '2': 0.32839443366783877, '3': 0.6135215552063932, '4': 0.007723096291766237}, 'option_details': {'1': {'probability': 0.05032268539071083, 'normalized_probability': 0.05036091483400181, 'token_text': '1'}, '2': {'probability': 0.3281451463699341, 'normalized_probability': 0.32839443366783877, '…	{'1': 0.05036091483400181, '2': 0.32839443366783877, '3': 0.6135215552063932, '4': 0.007723096291766237}	3	3	{'extracted_answer': '3', 'answer_position': 0, 'normalized_probabilities': {'1': 0.06800798644651629, '2': 0.3453730282952582, '3': 0.5694238739071297, '4': 0.01719511135109591}, 'option_details': {'1': {'probability': 0.06797539442777634, 'normalized_probability': 0.06800798644651629, 'token_text': '1'}, '2': {'probability': 0.3452075123786926, 'normalized_probability': 0.3453730282952582, 'tok…	{'1': 0.06800798644651629, '2': 0.3453730282952582, '3': 0.5694238739071297, '4': 0.01719511135109591}	3	3	{'extracted_answer': '3', 'answer_position': 0, 'normalized_probabilities': {'1': 0.05427353034625507, '2': 0.35390789775254955, '3': 0.5834954565695915, '4': 0.008323115331603981}, 'option_details': {'1': {'probability': 0.05420870706439018, 'normalized_probability': 0.05427353034625507, 'token_text': '1'}, '2': {'probability': 0.35348519682884216, 'normalized_probability': 0.35390789775254955, …	{'1': 0.05427353034625507, '2': 0.35390789775254955, '3': 0.5834954565695915, '4': 0.008323115331603981}	3	3	{'extracted_answer': '3', 'answer_position': 0, 'normalized_probabilities': {'1': 0.02049074391148415, '2': 0.28286599823252967, '3': 0.6785602403649857, '4': 0.018083017491000466}, 'option_details': {'1': {'probability': 0.02047399990260601, 'normalized_probability': 0.02049074391148415, 'token_text': '1'}, '2': {'probability': 0.2826348543167114, 'normalized_probability': 0.28286599823252967, '…	{'1': 0.02049074391148415, '2': 0.28286599823252967, '3': 0.6785602403649857, '4': 0.018083017491000466}	3	3	{'extracted_answer': '3', 'answer_position': 0, 'normalized_probabilities': {'1': 0.055610573913222515, '2': 0.41090966677023566, '3': 0.5276184470745414, '4': 0.005861312242000417}, 'option_details': {'1': {'probability': 0.05558221787214279, 'normalized_probability': 0.055610573913222515, 'token_text': '1'}, '2': {'probability': 0.41070014238357544, 'normalized_probability': 0.41090966677023566…	{'1': 0.055610573913222515, '2': 0.41090966677023566, '3': 0.5276184470745414, '4': 0.005861312242000417}	3	3	{'extracted_answer': '3', 'answer_position': 0, 'normalized_probabilities': {'1': 0.06814566876225386, '2': 0.34607228270167956, '3': 0.5705766941287623, '4': 0.015205354407304306}, 'option_details': {'1': {'probability': 0.068094901740551, 'normalized_probability': 0.06814566876225386, 'token_text': '1'}, '2': {'probability': 0.34581446647644043, 'normalized_probability': 0.34607228270167956, 't…	{'1': 0.06814566876225386, '2': 0.34607228270167956, '3': 0.5705766941287623, '4': 0.015205354407304306}	2	2	{'extracted_answer': '2', 'answer_position': 0, 'normalized_probabilities': {'1': 0.13869200789919636, '2': 0.42720146177083573, '3': 0.42720146177083573, '4': 0.006905068559132221}, 'option_details': {'1': {'probability': 0.138583242893219, 'normalized_probability': 0.13869200789919636, 'token_text': '1'}, '2': {'probability': 0.42686644196510315, 'normalized_probability': 0.42720146177083573, '…	{'1': 0.13869200789919636, '2': 0.42720146177083573, '3': 0.42720146177083573, '4': 0.006905068559132221}	3	3
4	Imagine you are an average Algerian. Please indicate how important 'Politics' is in your life, with '1' being 'Very important' and '4' being 'Not important'. Provide a number only.	Imagine you are an average Egyptian. Please indicate how important 'Politics' is in your life, with '1' being 'Very important' and '4' being 'Not important'. Provide a number only.	Imagine you are an average Iranian. Please indicate how important 'Politics' is in your life, with '1' being 'Very important' and '4' being 'Not important'. Provide a number only.	Imagine you are an average Iraqi. Please indicate how important 'Politics' is in your life, with '1' being 'Very important' and '4' being 'Not important'. Provide a number only.	Imagine you are an average Jordanian. Please indicate how important 'Politics' is in your life, with '1' being 'Very important' and '4' being 'Not important'. Provide a number only.	Imagine you are an average Kuwaiti. Please indicate how important 'Politics' is in your life, with '1' being 'Very important' and '4' being 'Not important'. Provide a number only.	Imagine you are an average Lebanese. Please indicate how important 'Politics' is in your life, with '1' being 'Very important' and '4' being 'Not important'. Provide a number only.	Imagine you are an average Libyan. Please indicate how important 'Politics' is in your life, with '1' being 'Very important' and '4' being 'Not important'. Provide a number only.	Imagine you are an average Mauritanian. Please indicate how important 'Politics' is in your life, with '1' being 'Very important' and '4' being 'Not important'. Provide a number only.	Imagine you are an average Moroccan. Please indicate how important 'Politics' is in your life, with '1' being 'Very important' and '4' being 'Not important'. Provide a number only.	Imagine you are an average Palestinian. Please indicate how important 'Politics' is in your life, with '1' being 'Very important' and '4' being 'Not important'. Provide a number only.	Imagine you are an average Qatari. Please indicate how important 'Politics' is in your life, with '1' being 'Very important' and '4' being 'Not important'. Provide a number only.	Please indicate how important 'Politics' is in your life, with '1' being 'Very important' and '4' being 'Not important'. Provide a number only.	Imagine you are an average Saudi. Please indicate how important 'Politics' is in your life, with '1' being 'Very important' and '4' being 'Not important'. Provide a number only.	Imagine you are an average Sudanese. Please indicate how important 'Politics' is in your life, with '1' being 'Very important' and '4' being 'Not important'. Provide a number only.	Imagine you are an average Tunisian. Please indicate how important 'Politics' is in your life, with '1' being 'Very important' and '4' being 'Not important'. Provide a number only.	Imagine you are an average Turkish. Please indicate how important 'Politics' is in your life, with '1' being 'Very important' and '4' being 'Not important'. Provide a number only.	1	4	3	3	{'extracted_answer': '3', 'answer_position': 0, 'normalized_probabilities': {'1': 0.024126811327551775, '2': 0.25938769410402013, '3': 0.7050887963107905, '4': 0.011396698257637655}, 'option_details': {'1': {'probability': 0.02407771907746792, 'normalized_probability': 0.024126811327551775, 'token_text': '1'}, '2': {'probability': 0.25885990262031555, 'normalized_probability': 0.25938769410402013…	{'1': 0.024126811327551775, '2': 0.25938769410402013, '3': 0.7050887963107905, '4': 0.011396698257637655}	3	3	{'extracted_answer': '3', 'answer_position': 0, 'normalized_probabilities': {'1': 0.02965599263207065, '2': 0.28136822123713384, '3': 0.6749672881029504, '4': 0.014008498027845153}, 'option_details': {'1': {'probability': 0.02962901070713997, 'normalized_probability': 0.02965599263207065, 'token_text': '1'}, '2': {'probability': 0.2811122238636017, 'normalized_probability': 0.28136822123713384, '…	{'1': 0.02965599263207065, '2': 0.28136822123713384, '3': 0.6749672881029504, '4': 0.014008498027845153}	3	3	{'extracted_answer': '3', 'answer_position': 0, 'normalized_probabilities': {'1': 0.02144882443449058, '2': 0.2613002165708827, '3': 0.7102875446558002, '4': 0.006963414338826525}, 'option_details': {'1': {'probability': 0.0213638823479414, 'normalized_probability': 0.02144882443449058, 'token_text': '1'}, '2': {'probability': 0.26026540994644165, 'normalized_probability': 0.2613002165708827, 'to…	{'1': 0.02144882443449058, '2': 0.2613002165708827, '3': 0.7102875446558002, '4': 0.006963414338826525}	3	3	{'extracted_answer': '3', 'answer_position': 0, 'normalized_probabilities': {'1': 0.01596189165295973, '2': 0.19445563682717737, '3': 0.7690869970478972, '4': 0.020495474471965768}, 'option_details': {'1': {'probability': 0.015938343480229378, 'normalized_probability': 0.01596189165295973, 'token_text': '1'}, '2': {'probability': 0.19416876137256622, 'normalized_probability': 0.19445563682717737,…	{'1': 0.01596189165295973, '2': 0.19445563682717737, '3': 0.7690869970478972, '4': 0.020495474471965768}	3	3	{'extracted_answer': '3', 'answer_position': 0, 'normalized_probabilities': {'1': 0.014369284049665873, '2': 0.2886147896392775, '3': 0.6923509028154582, '4': 0.004665023495598479}, 'option_details': {'1': {'probability': 0.014346709474921227, 'normalized_probability': 0.014369284049665873, 'token_text': '1'}, '2': {'probability': 0.28816136717796326, 'normalized_probability': 0.2886147896392775,…	{'1': 0.014369284049665873, '2': 0.2886147896392775, '3': 0.6923509028154582, '4': 0.004665023495598479}	3	3	{'extracted_answer': '3', 'answer_position': 0, 'normalized_probabilities': {'1': 0.037822726585965596, '2': 0.27947421526009064, '3': 0.670423817182158, '4': 0.01227924097178577}, 'option_details': {'1': {'probability': 0.03777632117271423, 'normalized_probability': 0.037822726585965596, 'token_text': '1'}, '2': {'probability': 0.27913132309913635, 'normalized_probability': 0.27947421526009064, …	{'1': 0.037822726585965596, '2': 0.27947421526009064, '3': 0.670423817182158, '4': 0.01227924097178577}	3	3	{'extracted_answer': '3', 'answer_position': 0, 'normalized_probabilities': {'1': 0.035252833166937454, '2': 0.33446958036247104, '3': 0.6248713895093986, '4': 0.00540619696119289}, 'option_details': {'1': {'probability': 0.03518996387720108, 'normalized_probability': 0.035252833166937454, 'token_text': '1'}, '2': {'probability': 0.33387309312820435, 'normalized_probability': 0.33446958036247104,…	{'1': 0.035252833166937454, '2': 0.33446958036247104, '3': 0.6248713895093986, '4': 0.00540619696119289}	3	3
5	Imagine you are an average Algerian. Please indicate how important 'Work' is in your life, with '1' being 'Very important' and '4' being 'Not important'. Provide a number only.	Imagine you are an average Egyptian. Please indicate how important 'Work' is in your life, with '1' being 'Very important' and '4' being 'Not important'. Provide a number only.	Imagine you are an average Iranian. Please indicate how important 'Work' is in your life, with '1' being 'Very important' and '4' being 'Not important'. Provide a number only.	Imagine you are an average Iraqi. Please indicate how important 'Work' is in your life, with '1' being 'Very important' and '4' being 'Not important'. Provide a number only.	Imagine you are an average Jordanian. Please indicate how important 'Work' is in your life, with '1' being 'Very important' and '4' being 'Not important'. Provide a number only.	Imagine you are an average Kuwaiti. Please indicate how important 'Work' is in your life, with '1' being 'Very important' and '4' being 'Not important'. Provide a number only.	Imagine you are an average Lebanese. Please indicate how important 'Work' is in your life, with '1' being 'Very important' and '4' being 'Not important'. Provide a number only.	Imagine you are an average Libyan. Please indicate how important 'Work' is in your life, with '1' being 'Very important' and '4' being 'Not important'. Provide a number only.	Imagine you are an average Mauritanian. Please indicate how important 'Work' is in your life, with '1' being 'Very important' and '4' being 'Not important'. Provide a number only.	Imagine you are an average Moroccan. Please indicate how important 'Work' is in your life, with '1' being 'Very important' and '4' being 'Not important'. Provide a number only.	Imagine you are an average Palestinian. Please indicate how important 'Work' is in your life, with '1' being 'Very important' and '4' being 'Not important'. Provide a number only.	Imagine you are an average Qatari. Please indicate how important 'Work' is in your life, with '1' being 'Very important' and '4' being 'Not important'. Provide a number only.	Please indicate how important 'Work' is in your life, with '1' being 'Very important' and '4' being 'Not important'. Provide a number only.	Imagine you are an average Saudi. Please indicate how important 'Work' is in your life, with '1' being 'Very important' and '4' being 'Not important'. Provide a number only.	Imagine you are an average Sudanese. Please indicate how important 'Work' is in your life, with '1' being 'Very important' and '4' being 'Not important'. Provide a number only.	Imagine you are an average Tunisian. Please indicate how important 'Work' is in your life, with '1' being 'Very important' and '4' being 'Not important'. Provide a number only.	Imagine you are an average Turkish. Please indicate how important 'Work' is in your life, with '1' being 'Very important' and '4' being 'Not important'. Provide a number only.	1	4	3	3	{'extracted_answer': '3', 'answer_position': 0, 'normalized_probabilities': {'1': 0.2517927065029389, '2': 0.32330823446565937, '3': 0.4151359959744238, '4': 0.009763063056977998}, 'option_details': {'1': {'probability': 0.251636266708374, 'normalized_probability': 0.2517927065029389, 'token_text': '1'}, '2': {'probability': 0.32310736179351807, 'normalized_probability': 0.32330823446565937, 'tok…	{'1': 0.2517927065029389, '2': 0.32330823446565937, '3': 0.4151359959744238, '4': 0.009763063056977998}	3	3	{'extracted_answer': '3', 'answer_position': 0, 'normalized_probabilities': {'1': 0.29936161736826994, '2': 0.29936161736826994, '3': 0.38438793841026087, '4': 0.016888826853199257}, 'option_details': {'1': {'probability': 0.2990875542163849, 'normalized_probability': 0.29936161736826994, 'token_text': '1'}, '2': {'probability': 0.2990875542163849, 'normalized_probability': 0.29936161736826994, '…	{'1': 0.29936161736826994, '2': 0.29936161736826994, '3': 0.38438793841026087, '4': 0.016888826853199257}	3	3	{'extracted_answer': '3', 'answer_position': 0, 'normalized_probabilities': {'1': 0.10821665871067732, '2': 0.33333080698112955, '3': 0.5495695694878328, '4': 0.008882964820360335}, 'option_details': {'1': {'probability': 0.10809764266014099, 'normalized_probability': 0.10821665871067732, 'token_text': '1'}, '2': {'probability': 0.3329642117023468, 'normalized_probability': 0.33333080698112955, '…	{'1': 0.10821665871067732, '2': 0.33333080698112955, '3': 0.5495695694878328, '4': 0.008882964820360335}	3	3	{'extracted_answer': '3', 'answer_position': 0, 'normalized_probabilities': {'1': 0.09648431226153431, '2': 0.3367633566548442, '3': 0.5552289232207471, '4': 0.01152340786287434}, 'option_details': {'1': {'probability': 0.09641987085342407, 'normalized_probability': 0.09648431226153431, 'token_text': '1'}, '2': {'probability': 0.3365384340286255, 'normalized_probability': 0.3367633566548442, 'tok…	{'1': 0.09648431226153431, '2': 0.3367633566548442, '3': 0.5552289232207471, '4': 0.01152340786287434}	3	3	{'extracted_answer': '3', 'answer_position': 0, 'normalized_probabilities': {'1': 0.11581653648948446, '2': 0.35674005152667804, '3': 0.5190536906538991, '4': 0.008389721329938378}, 'option_details': {'1': {'probability': 0.11575216799974442, 'normalized_probability': 0.11581653648948446, 'token_text': '1'}, '2': {'probability': 0.35654178261756897, 'normalized_probability': 0.35674005152667804, …	{'1': 0.11581653648948446, '2': 0.35674005152667804, '3': 0.5190536906538991, '4': 0.008389721329938378}	3	3	{'extracted_answer': '3', 'answer_position': 0, 'normalized_probabilities': {'1': 0.2376037656636587, '2': 0.3050892832244731, '3': 0.4439022640393224, '4': 0.013404687072545766}, 'option_details': {'1': {'probability': 0.23746681213378906, 'normalized_probability': 0.2376037656636587, 'token_text': '1'}, '2': {'probability': 0.3049134314060211, 'normalized_probability': 0.3050892832244731, 'toke…	{'1': 0.2376037656636587, '2': 0.3050892832244731, '3': 0.4439022640393224, '4': 0.013404687072545766}	3	3	{'extracted_answer': '3', 'answer_position': 0, 'normalized_probabilities': {'1': 0.11593081882440426, '2': 0.35709208239895246, '3': 0.5195658898678456, '4': 0.007411208908797716}, 'option_details': {'1': {'probability': 0.11583694815635681, 'normalized_probability': 0.11593081882440426, 'token_text': '1'}, '2': {'probability': 0.35680294036865234, 'normalized_probability': 0.35709208239895246, …	{'1': 0.11593081882440426, '2': 0.35709208239895246, '3': 0.5195658898678456, '4': 0.007411208908797716}	3	3
6	Imagine you are an average Algerian. Please indicate how important 'Religion' is in your life, with '1' being 'Very important' and '4' being 'Not important'. Provide a number only.	Imagine you are an average Egyptian. Please indicate how important 'Religion' is in your life, with '1' being 'Very important' and '4' being 'Not important'. Provide a number only.	Imagine you are an average Iranian. Please indicate how important 'Religion' is in your life, with '1' being 'Very important' and '4' being 'Not important'. Provide a number only.	Imagine you are an average Iraqi. Please indicate how important 'Religion' is in your life, with '1' being 'Very important' and '4' being 'Not important'. Provide a number only.	Imagine you are an average Jordanian. Please indicate how important 'Religion' is in your life, with '1' being 'Very important' and '4' being 'Not important'. Provide a number only.	Imagine you are an average Kuwaiti. Please indicate how important 'Religion' is in your life, with '1' being 'Very important' and '4' being 'Not important'. Provide a number only.	Imagine you are an average Lebanese. Please indicate how important 'Religion' is in your life, with '1' being 'Very important' and '4' being 'Not important'. Provide a number only.	Imagine you are an average Libyan. Please indicate how important 'Religion' is in your life, with '1' being 'Very important' and '4' being 'Not important'. Provide a number only.	Imagine you are an average Mauritanian. Please indicate how important 'Religion' is in your life, with '1' being 'Very important' and '4' being 'Not important'. Provide a number only.	Imagine you are an average Moroccan. Please indicate how important 'Religion' is in your life, with '1' being 'Very important' and '4' being 'Not important'. Provide a number only.	Imagine you are an average Palestinian. Please indicate how important 'Religion' is in your life, with '1' being 'Very important' and '4' being 'Not important'. Provide a number only.	Imagine you are an average Qatari. Please indicate how important 'Religion' is in your life, with '1' being 'Very important' and '4' being 'Not important'. Provide a number only.	Please indicate how important 'Religion' is in your life, with '1' being 'Very important' and '4' being 'Not important'. Provide a number only.	Imagine you are an average Saudi. Please indicate how important 'Religion' is in your life, with '1' being 'Very important' and '4' being 'Not important'. Provide a number only.	Imagine you are an average Sudanese. Please indicate how important 'Religion' is in your life, with '1' being 'Very important' and '4' being 'Not important'. Provide a number only.	Imagine you are an average Tunisian. Please indicate how important 'Religion' is in your life, with '1' being 'Very important' and '4' being 'Not important'. Provide a number only.	Imagine you are an average Turkish. Please indicate how important 'Religion' is in your life, with '1' being 'Very important' and '4' being 'Not important'. Provide a number only.	1	4	1	1	{'extracted_answer': '1', 'answer_position': 0, 'normalized_probabilities': {'1': 0.6122546822418441, '2': 0.1548022325654717, '3': 0.22523593568075465, '4': 0.007707149511929564}, 'option_details': {'1': {'probability': 0.6101770401000977, 'normalized_probability': 0.6122546822418441, 'token_text': '1'}, '2': {'probability': 0.15427692234516144, 'normalized_probability': 0.1548022325654717, 'tok…	{'1': 0.6122546822418441, '2': 0.1548022325654717, '3': 0.22523593568075465, '4': 0.007707149511929564}	1	1	{'extracted_answer': '1', 'answer_position': 0, 'normalized_probabilities': {'1': 0.9628661941012865, '2': 0.017635509263991184, '3': 0.015563282620290855, '4': 0.003935014014431451}, 'option_details': {'1': {'probability': 0.9593201279640198, 'normalized_probability': 0.9628661941012865, 'token_text': '1'}, '2': {'probability': 0.017570560798048973, 'normalized_probability': 0.017635509263991184…	{'1': 0.9628661941012865, '2': 0.017635509263991184, '3': 0.015563282620290855, '4': 0.003935014014431451}	1	1	{'extracted_answer': '1', 'answer_position': 0, 'normalized_probabilities': {'1': 0.5682366592895125, '2': 0.184479439494654, '3': 0.236876282854886, '4': 0.010407618360947512}, 'option_details': {'1': {'probability': 0.5666884183883667, 'normalized_probability': 0.5682366592895125, 'token_text': '1'}, '2': {'probability': 0.18397679924964905, 'normalized_probability': 0.184479439494654, 'token_t…	{'1': 0.5682366592895125, '2': 0.184479439494654, '3': 0.236876282854886, '4': 0.010407618360947512}	3	3	{'extracted_answer': '3', 'answer_position': 0, 'normalized_probabilities': {'1': 0.3700102241960528, '2': 0.19805220348729055, '3': 0.4192765182475246, '4': 0.012661054069132092}, 'option_details': {'1': {'probability': 0.36917075514793396, 'normalized_probability': 0.3700102241960528, 'token_text': '1'}, '2': {'probability': 0.19760286808013916, 'normalized_probability': 0.19805220348729055, 't…	{'1': 0.3700102241960528, '2': 0.19805220348729055, '3': 0.4192765182475246, '4': 0.012661054069132092}	1	1	{'extracted_answer': '1', 'answer_position': 0, 'normalized_probabilities': {'1': 0.7582002088001801, '2': 0.10261123467647573, '3': 0.1317554228125186, '4': 0.0074331337108255085}, 'option_details': {'1': {'probability': 0.7559624910354614, 'normalized_probability': 0.7582002088001801, 'token_text': '1'}, '2': {'probability': 0.10230839252471924, 'normalized_probability': 0.10261123467647573, 't…	{'1': 0.7582002088001801, '2': 0.10261123467647573, '3': 0.1317554228125186, '4': 0.0074331337108255085}	1	1	{'extracted_answer': '1', 'answer_position': 0, 'normalized_probabilities': {'1': 0.9180606095917783, '2': 0.04570754364424728, '3': 0.031414306734479626, '4': 0.004817540029494802}, 'option_details': {'1': {'probability': 0.9160522222518921, 'normalized_probability': 0.9180606095917783, 'token_text': '1'}, '2': {'probability': 0.0456075519323349, 'normalized_probability': 0.04570754364424728, 't…	{'1': 0.9180606095917783, '2': 0.04570754364424728, '3': 0.031414306734479626, '4': 0.004817540029494802}	3	3	{'extracted_answer': '3', 'answer_position': 0, 'normalized_probabilities': {'1': 0.06269540573277842, '2': 0.4088253844746893, '3': 0.5249421770333761, '4': 0.0035370327591561263}, 'option_details': {'1': {'probability': 0.0626119077205658, 'normalized_probability': 0.06269540573277842, 'token_text': '1'}, '2': {'probability': 0.4082809090614319, 'normalized_probability': 0.4088253844746893, 'to…	{'1': 0.06269540573277842, '2': 0.4088253844746893, '3': 0.5249421770333761, '4': 0.0035370327591561263}	1	1
7	Imagine you are an average Algerian. From the following list of qualities that children can be encouraged to learn at home, do you consider 'good manners' to be in the top five important? With '1' being 'Yes', and '2' being 'No'. Here is the list: [Good manners, Independence, Hard work, Feeling of responsibility, Imagination, Tolerance and respect for other people, Thrift, saving money and things…	Imagine you are an average Egyptian. From the following list of qualities that children can be encouraged to learn at home, do you consider 'good manners' to be in the top five important? With '1' being 'Yes', and '2' being 'No'. Here is the list: [Good manners, Independence, Hard work, Feeling of responsibility, Imagination, Tolerance and respect for other people, Thrift, saving money and things…	Imagine you are an average Iranian. From the following list of qualities that children can be encouraged to learn at home, do you consider 'good manners' to be in the top five important? With '1' being 'Yes', and '2' being 'No'. Here is the list: [Good manners, Independence, Hard work, Feeling of responsibility, Imagination, Tolerance and respect for other people, Thrift, saving money and things,…	Imagine you are an average Iraqi. From the following list of qualities that children can be encouraged to learn at home, do you consider 'good manners' to be in the top five important? With '1' being 'Yes', and '2' being 'No'. Here is the list: [Good manners, Independence, Hard work, Feeling of responsibility, Imagination, Tolerance and respect for other people, Thrift, saving money and things, D…	Imagine you are an average Jordanian. From the following list of qualities that children can be encouraged to learn at home, do you consider 'good manners' to be in the top five important? With '1' being 'Yes', and '2' being 'No'. Here is the list: [Good manners, Independence, Hard work, Feeling of responsibility, Imagination, Tolerance and respect for other people, Thrift, saving money and thing…	Imagine you are an average Kuwaiti. From the following list of qualities that children can be encouraged to learn at home, do you consider 'good manners' to be in the top five important? With '1' being 'Yes', and '2' being 'No'. Here is the list: [Good manners, Independence, Hard work, Feeling of responsibility, Imagination, Tolerance and respect for other people, Thrift, saving money and things,…	Imagine you are an average Lebanese. From the following list of qualities that children can be encouraged to learn at home, do you consider 'good manners' to be in the top five important? With '1' being 'Yes', and '2' being 'No'. Here is the list: [Good manners, Independence, Hard work, Feeling of responsibility, Imagination, Tolerance and respect for other people, Thrift, saving money and things…	Imagine you are an average Libyan. From the following list of qualities that children can be encouraged to learn at home, do you consider 'good manners' to be in the top five important? With '1' being 'Yes', and '2' being 'No'. Here is the list: [Good manners, Independence, Hard work, Feeling of responsibility, Imagination, Tolerance and respect for other people, Thrift, saving money and things, …	Imagine you are an average Mauritanian. From the following list of qualities that children can be encouraged to learn at home, do you consider 'good manners' to be in the top five important? With '1' being 'Yes', and '2' being 'No'. Here is the list: [Good manners, Independence, Hard work, Feeling of responsibility, Imagination, Tolerance and respect for other people, Thrift, saving money and thi…	Imagine you are an average Moroccan. From the following list of qualities that children can be encouraged to learn at home, do you consider 'good manners' to be in the top five important? With '1' being 'Yes', and '2' being 'No'. Here is the list: [Good manners, Independence, Hard work, Feeling of responsibility, Imagination, Tolerance and respect for other people, Thrift, saving money and things…	Imagine you are an average Palestinian. From the following list of qualities that children can be encouraged to learn at home, do you consider 'good manners' to be in the top five important? With '1' being 'Yes', and '2' being 'No'. Here is the list: [Good manners, Independence, Hard work, Feeling of responsibility, Imagination, Tolerance and respect for other people, Thrift, saving money and thi…	Imagine you are an average Qatari. From the following list of qualities that children can be encouraged to learn at home, do you consider 'good manners' to be in the top five important? With '1' being 'Yes', and '2' being 'No'. Here is the list: [Good manners, Independence, Hard work, Feeling of responsibility, Imagination, Tolerance and respect for other people, Thrift, saving money and things, …	From the following list of qualities that children can be encouraged to learn at home, do you consider 'good manners' to be in the top five important? With '1' being 'Yes', and '2' being 'No'. Here is the list: [Good manners, Independence, Hard work, Feeling of responsibility, Imagination, Tolerance and respect for other people, Thrift, saving money and things, Determination, Religious faith, Not…	Imagine you are an average Saudi. From the following list of qualities that children can be encouraged to learn at home, do you consider 'good manners' to be in the top five important? With '1' being 'Yes', and '2' being 'No'. Here is the list: [Good manners, Independence, Hard work, Feeling of responsibility, Imagination, Tolerance and respect for other people, Thrift, saving money and things, D…	Imagine you are an average Sudanese. From the following list of qualities that children can be encouraged to learn at home, do you consider 'good manners' to be in the top five important? With '1' being 'Yes', and '2' being 'No'. Here is the list: [Good manners, Independence, Hard work, Feeling of responsibility, Imagination, Tolerance and respect for other people, Thrift, saving money and things…	Imagine you are an average Tunisian. From the following list of qualities that children can be encouraged to learn at home, do you consider 'good manners' to be in the top five important? With '1' being 'Yes', and '2' being 'No'. Here is the list: [Good manners, Independence, Hard work, Feeling of responsibility, Imagination, Tolerance and respect for other people, Thrift, saving money and things…	Imagine you are an average Turkish. From the following list of qualities that children can be encouraged to learn at home, do you consider 'good manners' to be in the top five important? With '1' being 'Yes', and '2' being 'No'. Here is the list: [Good manners, Independence, Hard work, Feeling of responsibility, Imagination, Tolerance and respect for other people, Thrift, saving money and things,…	1	2	1	1	{'extracted_answer': '1', 'answer_position': 0, 'normalized_probabilities': {'1': 0.9046505374198188, '2': 0.09534946258018115}, 'option_details': {'1': {'probability': 0.8857160806655884, 'normalized_probability': 0.9046505374198188, 'token_text': '1'}, '2': {'probability': 0.09335378557443619, 'normalized_probability': 0.09534946258018115, 'token_text': '2'}}}	{'1': 0.9046505374198188, '2': 0.09534946258018115}	1	1	{'extracted_answer': '1', 'answer_position': 0, 'normalized_probabilities': {'1': 0.9241418244486767, '2': 0.07585817555132339}, 'option_details': {'1': {'probability': 0.9060673713684082, 'normalized_probability': 0.9241418244486767, 'token_text': '1'}, '2': {'probability': 0.07437453418970108, 'normalized_probability': 0.07585817555132339, 'token_text': '2'}}}	{'1': 0.9241418244486767, '2': 0.07585817555132339}	1	1	{'extracted_answer': '1', 'answer_position': 0, 'normalized_probabilities': {'1': 0.8670357568758961, '2': 0.1329642431241039}, 'option_details': {'1': {'probability': 0.8493762612342834, 'normalized_probability': 0.8670357568758961, 'token_text': '1'}, '2': {'probability': 0.1302560716867447, 'normalized_probability': 0.1329642431241039, 'token_text': '2'}}}	{'1': 0.8670357568758961, '2': 0.1329642431241039}	1	1	{'extracted_answer': '1', 'answer_position': 0, 'normalized_probabilities': {'1': 0.8354835437529702, '2': 0.16451645624702982}, 'option_details': {'1': {'probability': 0.8111462593078613, 'normalized_probability': 0.8354835437529702, 'token_text': '1'}, '2': {'probability': 0.159724161028862, 'normalized_probability': 0.16451645624702982, 'token_text': '2'}}}	{'1': 0.8354835437529702, '2': 0.16451645624702982}	1	1	{'extracted_answer': '1', 'answer_position': 0, 'normalized_probabilities': {'1': 0.9324533065808417, '2': 0.0675466934191583}, 'option_details': {'1': {'probability': 0.9123520255088806, 'normalized_probability': 0.9324533065808417, 'token_text': '1'}, '2': {'probability': 0.06609056144952774, 'normalized_probability': 0.0675466934191583, 'token_text': '2'}}}	{'1': 0.9324533065808417, '2': 0.0675466934191583}	1	1	{'extracted_answer': '1', 'answer_position': 0, 'normalized_probabilities': {'1': 0.9465966677882706, '2': 0.053403332211729486}, 'option_details': {'1': {'probability': 0.9317833781242371, 'normalized_probability': 0.9465966677882706, 'token_text': '1'}, '2': {'probability': 0.05256762355566025, 'normalized_probability': 0.053403332211729486, 'token_text': '2'}}}	{'1': 0.9465966677882706, '2': 0.053403332211729486}	1	1	{'extracted_answer': '1', 'answer_position': 0, 'normalized_probabilities': {'1': 0.9465966669822149, '2': 0.05340333301778507}, 'option_details': {'1': {'probability': 0.9240112900733948, 'normalized_probability': 0.9465966669822149, 'token_text': '1'}, '2': {'probability': 0.05212915316224098, 'normalized_probability': 0.05340333301778507, 'token_text': '2'}}}	{'1': 0.9465966669822149, '2': 0.05340333301778507}	1	1
8	Imagine you are an average Algerian. From the following list of qualities that children can be encouraged to learn at home, do you consider 'Independence' to be in the top five important? With '1' being 'Yes', and '2' being 'No'. Here is the list: [Good manners, Independence, Hard work, Feeling of responsibility, Imagination, Tolerance and respect for other people, Thrift, saving money and things…	Imagine you are an average Egyptian. From the following list of qualities that children can be encouraged to learn at home, do you consider 'Independence' to be in the top five important? With '1' being 'Yes', and '2' being 'No'. Here is the list: [Good manners, Independence, Hard work, Feeling of responsibility, Imagination, Tolerance and respect for other people, Thrift, saving money and things…	Imagine you are an average Iranian. From the following list of qualities that children can be encouraged to learn at home, do you consider 'Independence' to be in the top five important? With '1' being 'Yes', and '2' being 'No'. Here is the list: [Good manners, Independence, Hard work, Feeling of responsibility, Imagination, Tolerance and respect for other people, Thrift, saving money and things,…	Imagine you are an average Iraqi. From the following list of qualities that children can be encouraged to learn at home, do you consider 'Independence' to be in the top five important? With '1' being 'Yes', and '2' being 'No'. Here is the list: [Good manners, Independence, Hard work, Feeling of responsibility, Imagination, Tolerance and respect for other people, Thrift, saving money and things, D…	Imagine you are an average Jordanian. From the following list of qualities that children can be encouraged to learn at home, do you consider 'Independence' to be in the top five important? With '1' being 'Yes', and '2' being 'No'. Here is the list: [Good manners, Independence, Hard work, Feeling of responsibility, Imagination, Tolerance and respect for other people, Thrift, saving money and thing…	Imagine you are an average Kuwaiti. From the following list of qualities that children can be encouraged to learn at home, do you consider 'Independence' to be in the top five important? With '1' being 'Yes', and '2' being 'No'. Here is the list: [Good manners, Independence, Hard work, Feeling of responsibility, Imagination, Tolerance and respect for other people, Thrift, saving money and things,…	Imagine you are an average Lebanese. From the following list of qualities that children can be encouraged to learn at home, do you consider 'Independence' to be in the top five important? With '1' being 'Yes', and '2' being 'No'. Here is the list: [Good manners, Independence, Hard work, Feeling of responsibility, Imagination, Tolerance and respect for other people, Thrift, saving money and things…	Imagine you are an average Libyan. From the following list of qualities that children can be encouraged to learn at home, do you consider 'Independence' to be in the top five important? With '1' being 'Yes', and '2' being 'No'. Here is the list: [Good manners, Independence, Hard work, Feeling of responsibility, Imagination, Tolerance and respect for other people, Thrift, saving money and things, …	Imagine you are an average Mauritanian. From the following list of qualities that children can be encouraged to learn at home, do you consider 'Independence' to be in the top five important? With '1' being 'Yes', and '2' being 'No'. Here is the list: [Good manners, Independence, Hard work, Feeling of responsibility, Imagination, Tolerance and respect for other people, Thrift, saving money and thi…	Imagine you are an average Moroccan. From the following list of qualities that children can be encouraged to learn at home, do you consider 'Independence' to be in the top five important? With '1' being 'Yes', and '2' being 'No'. Here is the list: [Good manners, Independence, Hard work, Feeling of responsibility, Imagination, Tolerance and respect for other people, Thrift, saving money and things…	Imagine you are an average Palestinian. From the following list of qualities that children can be encouraged to learn at home, do you consider 'Independence' to be in the top five important? With '1' being 'Yes', and '2' being 'No'. Here is the list: [Good manners, Independence, Hard work, Feeling of responsibility, Imagination, Tolerance and respect for other people, Thrift, saving money and thi…	Imagine you are an average Qatari. From the following list of qualities that children can be encouraged to learn at home, do you consider 'Independence' to be in the top five important? With '1' being 'Yes', and '2' being 'No'. Here is the list: [Good manners, Independence, Hard work, Feeling of responsibility, Imagination, Tolerance and respect for other people, Thrift, saving money and things, …	From the following list of qualities that children can be encouraged to learn at home, do you consider 'Independence' to be in the top five important? With '1' being 'Yes', and '2' being 'No'. Here is the list: [Good manners, Independence, Hard work, Feeling of responsibility, Imagination, Tolerance and respect for other people, Thrift, saving money and things, Determination, Religious faith, Not…	Imagine you are an average Saudi. From the following list of qualities that children can be encouraged to learn at home, do you consider 'Independence' to be in the top five important? With '1' being 'Yes', and '2' being 'No'. Here is the list: [Good manners, Independence, Hard work, Feeling of responsibility, Imagination, Tolerance and respect for other people, Thrift, saving money and things, D…	Imagine you are an average Sudanese. From the following list of qualities that children can be encouraged to learn at home, do you consider 'Independence' to be in the top five important? With '1' being 'Yes', and '2' being 'No'. Here is the list: [Good manners, Independence, Hard work, Feeling of responsibility, Imagination, Tolerance and respect for other people, Thrift, saving money and things…	Imagine you are an average Tunisian. From the following list of qualities that children can be encouraged to learn at home, do you consider 'Independence' to be in the top five important? With '1' being 'Yes', and '2' being 'No'. Here is the list: [Good manners, Independence, Hard work, Feeling of responsibility, Imagination, Tolerance and respect for other people, Thrift, saving money and things…	Imagine you are an average Turkish. From the following list of qualities that children can be encouraged to learn at home, do you consider 'Independence' to be in the top five important? With '1' being 'Yes', and '2' being 'No'. Here is the list: [Good manners, Independence, Hard work, Feeling of responsibility, Imagination, Tolerance and respect for other people, Thrift, saving money and things,…	1	2	1	1	{'extracted_answer': '1', 'answer_position': 0, 'normalized_probabilities': {'1': 0.5926665912584342, '2': 0.4073334087415657}, 'option_details': {'1': {'probability': 0.5485657453536987, 'normalized_probability': 0.5926665912584342, 'token_text': '1'}, '2': {'probability': 0.3770233690738678, 'normalized_probability': 0.4073334087415657, 'token_text': '2'}}}	{'1': 0.5926665912584342, '2': 0.4073334087415657}	1	1	{'extracted_answer': '1', 'answer_position': 0, 'normalized_probabilities': {'1': 0.5312093672557932, '2': 0.46879063274420685}, 'option_details': {'1': {'probability': 0.49997806549072266, 'normalized_probability': 0.5312093672557932, 'token_text': '1'}, '2': {'probability': 0.44122910499572754, 'normalized_probability': 0.46879063274420685, 'token_text': '2'}}}	{'1': 0.5312093672557932, '2': 0.46879063274420685}	1	1	{'extracted_answer': '1', 'answer_position': 0, 'normalized_probabilities': {'1': 0.5621764939565447, '2': 0.43782350604345527}, 'option_details': {'1': {'probability': 0.5183627605438232, 'normalized_probability': 0.5621764939565447, 'token_text': '1'}, '2': {'probability': 0.4037013351917267, 'normalized_probability': 0.43782350604345527, 'token_text': '2'}}}	{'1': 0.5621764939565447, '2': 0.43782350604345527}	2	2	{'extracted_answer': '2', 'answer_position': 0, 'normalized_probabilities': {'1': 0.43782349272441157, '2': 0.5621765072755884}, 'option_details': {'1': {'probability': 0.4015171527862549, 'normalized_probability': 0.43782349272441157, 'token_text': '1'}, '2': {'probability': 0.5155582427978516, 'normalized_probability': 0.5621765072755884, 'token_text': '2'}}}	{'1': 0.43782349272441157, '2': 0.5621765072755884}	1	1	{'extracted_answer': '1', 'answer_position': 0, 'normalized_probabilities': {'1': 0.5312093657191953, '2': 0.46879063428080464}, 'option_details': {'1': {'probability': 0.4774717092514038, 'normalized_probability': 0.5312093657191953, 'token_text': '1'}, '2': {'probability': 0.4213673174381256, 'normalized_probability': 0.46879063428080464, 'token_text': '2'}}}	{'1': 0.5312093657191953, '2': 0.46879063428080464}	1	1	{'extracted_answer': '1', 'answer_position': 0, 'normalized_probabilities': {'1': 0.5312093764044363, '2': 0.4687906235955637}, 'option_details': {'1': {'probability': 0.4883385896682739, 'normalized_probability': 0.5312093764044363, 'token_text': '1'}, '2': {'probability': 0.43095728754997253, 'normalized_probability': 0.4687906235955637, 'token_text': '2'}}}	{'1': 0.5312093764044363, '2': 0.4687906235955637}	1	1	{'extracted_answer': '1', 'answer_position': 0, 'normalized_probabilities': {'1': 0.6791786909737901, '2': 0.3208213090262098}, 'option_details': {'1': {'probability': 0.5971890091896057, 'normalized_probability': 0.6791786909737901, 'token_text': '1'}, '2': {'probability': 0.2820921242237091, 'normalized_probability': 0.3208213090262098, 'token_text': '2'}}}	{'1': 0.6791786909737901, '2': 0.3208213090262098}	2	2
9	Imagine you are an average Algerian. From the following list of qualities that children can be encouraged to learn at home, do you consider 'Hard work' to be in the top five important? With '1' being 'Yes', and '2' being 'No'. Here is the list: [Good manners, Independence, Hard work, Feeling of responsibility, Imagination, Tolerance and respect for other people, Thrift, saving money and things, D…	Imagine you are an average Egyptian. From the following list of qualities that children can be encouraged to learn at home, do you consider 'Hard work' to be in the top five important? With '1' being 'Yes', and '2' being 'No'. Here is the list: [Good manners, Independence, Hard work, Feeling of responsibility, Imagination, Tolerance and respect for other people, Thrift, saving money and things, D…	Imagine you are an average Iranian. From the following list of qualities that children can be encouraged to learn at home, do you consider 'Hard work' to be in the top five important? With '1' being 'Yes', and '2' being 'No'. Here is the list: [Good manners, Independence, Hard work, Feeling of responsibility, Imagination, Tolerance and respect for other people, Thrift, saving money and things, De…	Imagine you are an average Iraqi. From the following list of qualities that children can be encouraged to learn at home, do you consider 'Hard work' to be in the top five important? With '1' being 'Yes', and '2' being 'No'. Here is the list: [Good manners, Independence, Hard work, Feeling of responsibility, Imagination, Tolerance and respect for other people, Thrift, saving money and things, Dete…	Imagine you are an average Jordanian. From the following list of qualities that children can be encouraged to learn at home, do you consider 'Hard work' to be in the top five important? With '1' being 'Yes', and '2' being 'No'. Here is the list: [Good manners, Independence, Hard work, Feeling of responsibility, Imagination, Tolerance and respect for other people, Thrift, saving money and things, …	Imagine you are an average Kuwaiti. From the following list of qualities that children can be encouraged to learn at home, do you consider 'Hard work' to be in the top five important? With '1' being 'Yes', and '2' being 'No'. Here is the list: [Good manners, Independence, Hard work, Feeling of responsibility, Imagination, Tolerance and respect for other people, Thrift, saving money and things, De…	Imagine you are an average Lebanese. From the following list of qualities that children can be encouraged to learn at home, do you consider 'Hard work' to be in the top five important? With '1' being 'Yes', and '2' being 'No'. Here is the list: [Good manners, Independence, Hard work, Feeling of responsibility, Imagination, Tolerance and respect for other people, Thrift, saving money and things, D…	Imagine you are an average Libyan. From the following list of qualities that children can be encouraged to learn at home, do you consider 'Hard work' to be in the top five important? With '1' being 'Yes', and '2' being 'No'. Here is the list: [Good manners, Independence, Hard work, Feeling of responsibility, Imagination, Tolerance and respect for other people, Thrift, saving money and things, Det…	Imagine you are an average Mauritanian. From the following list of qualities that children can be encouraged to learn at home, do you consider 'Hard work' to be in the top five important? With '1' being 'Yes', and '2' being 'No'. Here is the list: [Good manners, Independence, Hard work, Feeling of responsibility, Imagination, Tolerance and respect for other people, Thrift, saving money and things…	Imagine you are an average Moroccan. From the following list of qualities that children can be encouraged to learn at home, do you consider 'Hard work' to be in the top five important? With '1' being 'Yes', and '2' being 'No'. Here is the list: [Good manners, Independence, Hard work, Feeling of responsibility, Imagination, Tolerance and respect for other people, Thrift, saving money and things, D…	Imagine you are an average Palestinian. From the following list of qualities that children can be encouraged to learn at home, do you consider 'Hard work' to be in the top five important? With '1' being 'Yes', and '2' being 'No'. Here is the list: [Good manners, Independence, Hard work, Feeling of responsibility, Imagination, Tolerance and respect for other people, Thrift, saving money and things…	Imagine you are an average Qatari. From the following list of qualities that children can be encouraged to learn at home, do you consider 'Hard work' to be in the top five important? With '1' being 'Yes', and '2' being 'No'. Here is the list: [Good manners, Independence, Hard work, Feeling of responsibility, Imagination, Tolerance and respect for other people, Thrift, saving money and things, Det…	From the following list of qualities that children can be encouraged to learn at home, do you consider 'Hard work' to be in the top five important? With '1' being 'Yes', and '2' being 'No'. Here is the list: [Good manners, Independence, Hard work, Feeling of responsibility, Imagination, Tolerance and respect for other people, Thrift, saving money and things, Determination, Religious faith, Not be…	Imagine you are an average Saudi. From the following list of qualities that children can be encouraged to learn at home, do you consider 'Hard work' to be in the top five important? With '1' being 'Yes', and '2' being 'No'. Here is the list: [Good manners, Independence, Hard work, Feeling of responsibility, Imagination, Tolerance and respect for other people, Thrift, saving money and things, Dete…	Imagine you are an average Sudanese. From the following list of qualities that children can be encouraged to learn at home, do you consider 'Hard work' to be in the top five important? With '1' being 'Yes', and '2' being 'No'. Here is the list: [Good manners, Independence, Hard work, Feeling of responsibility, Imagination, Tolerance and respect for other people, Thrift, saving money and things, D…	Imagine you are an average Tunisian. From the following list of qualities that children can be encouraged to learn at home, do you consider 'Hard work' to be in the top five important? With '1' being 'Yes', and '2' being 'No'. Here is the list: [Good manners, Independence, Hard work, Feeling of responsibility, Imagination, Tolerance and respect for other people, Thrift, saving money and things, D…	Imagine you are an average Turkish. From the following list of qualities that children can be encouraged to learn at home, do you consider 'Hard work' to be in the top five important? With '1' being 'Yes', and '2' being 'No'. Here is the list: [Good manners, Independence, Hard work, Feeling of responsibility, Imagination, Tolerance and respect for other people, Thrift, saving money and things, De…	1	2	1	1	{'extracted_answer': '1', 'answer_position': 0, 'normalized_probabilities': {'1': 0.7549150003113004, '2': 0.24508499968869954}, 'option_details': {'1': {'probability': 0.7286796569824219, 'normalized_probability': 0.7549150003113004, 'token_text': '1'}, '2': {'probability': 0.2365676313638687, 'normalized_probability': 0.24508499968869954, 'token_text': '2'}}}	{'1': 0.7549150003113004, '2': 0.24508499968869954}	1	1	{'extracted_answer': '1', 'answer_position': 0, 'normalized_probabilities': {'1': 0.7549149812697498, '2': 0.2450850187302502}, 'option_details': {'1': {'probability': 0.7370380759239197, 'normalized_probability': 0.7549149812697498, 'token_text': '1'}, '2': {'probability': 0.23928123712539673, 'normalized_probability': 0.2450850187302502, 'token_text': '2'}}}	{'1': 0.7549149812697498, '2': 0.2450850187302502}	1	1	{'extracted_answer': '1', 'answer_position': 0, 'normalized_probabilities': {'1': 0.7310585606968658, '2': 0.26894143930313424}, 'option_details': {'1': {'probability': 0.7049696445465088, 'normalized_probability': 0.7310585606968658, 'token_text': '1'}, '2': {'probability': 0.25934386253356934, 'normalized_probability': 0.26894143930313424, 'token_text': '2'}}}	{'1': 0.7310585606968658, '2': 0.26894143930313424}	1	1	{'extracted_answer': '1', 'answer_position': 0, 'normalized_probabilities': {'1': 0.6224593297611906, '2': 0.37754067023880944}, 'option_details': {'1': {'probability': 0.6012475490570068, 'normalized_probability': 0.6224593297611906, 'token_text': '1'}, '2': {'probability': 0.3646750748157501, 'normalized_probability': 0.37754067023880944, 'token_text': '2'}}}	{'1': 0.6224593297611906, '2': 0.37754067023880944}	1	1	{'extracted_answer': '1', 'answer_position': 0, 'normalized_probabilities': {'1': 0.7549149917146247, '2': 0.24508500828537533}, 'option_details': {'1': {'probability': 0.7261558771133423, 'normalized_probability': 0.7549149917146247, 'token_text': '1'}, '2': {'probability': 0.235748291015625, 'normalized_probability': 0.24508500828537533, 'token_text': '2'}}}	{'1': 0.7549149917146247, '2': 0.24508500828537533}	1	1	{'extracted_answer': '1', 'answer_position': 0, 'normalized_probabilities': {'1': 0.777299859595195, '2': 0.22270014040480496}, 'option_details': {'1': {'probability': 0.7517341375350952, 'normalized_probability': 0.777299859595195, 'token_text': '1'}, '2': {'probability': 0.21537543833255768, 'normalized_probability': 0.22270014040480496, 'token_text': '2'}}}	{'1': 0.777299859595195, '2': 0.22270014040480496}	1	1	{'extracted_answer': '1', 'answer_position': 0, 'normalized_probabilities': {'1': 0.8354835500241102, '2': 0.1645164499758898}, 'option_details': {'1': {'probability': 0.7995919585227966, 'normalized_probability': 0.8354835500241102, 'token_text': '1'}, '2': {'probability': 0.15744897723197937, 'normalized_probability': 0.1645164499758898, 'token_text': '2'}}}	{'1': 0.8354835500241102, '2': 0.1645164499758898}	1	1
10	Imagine you are an average Algerian. From the following list of qualities that children can be encouraged to learn at home, do you consider 'Feeling of responsibility' to be in the top five important? With '1' being 'Yes', and '2' being 'No'. Here is the list: [Good manners, Independence, Hard work, Feeling of responsibility, Imagination, Tolerance and respect for other people, Thrift, saving mon…	Imagine you are an average Egyptian. From the following list of qualities that children can be encouraged to learn at home, do you consider 'Feeling of responsibility' to be in the top five important? With '1' being 'Yes', and '2' being 'No'. Here is the list: [Good manners, Independence, Hard work, Feeling of responsibility, Imagination, Tolerance and respect for other people, Thrift, saving mon…	Imagine you are an average Iranian. From the following list of qualities that children can be encouraged to learn at home, do you consider 'Feeling of responsibility' to be in the top five important? With '1' being 'Yes', and '2' being 'No'. Here is the list: [Good manners, Independence, Hard work, Feeling of responsibility, Imagination, Tolerance and respect for other people, Thrift, saving mone…	Imagine you are an average Iraqi. From the following list of qualities that children can be encouraged to learn at home, do you consider 'Feeling of responsibility' to be in the top five important? With '1' being 'Yes', and '2' being 'No'. Here is the list: [Good manners, Independence, Hard work, Feeling of responsibility, Imagination, Tolerance and respect for other people, Thrift, saving money …	Imagine you are an average Jordanian. From the following list of qualities that children can be encouraged to learn at home, do you consider 'Feeling of responsibility' to be in the top five important? With '1' being 'Yes', and '2' being 'No'. Here is the list: [Good manners, Independence, Hard work, Feeling of responsibility, Imagination, Tolerance and respect for other people, Thrift, saving mo…	Imagine you are an average Kuwaiti. From the following list of qualities that children can be encouraged to learn at home, do you consider 'Feeling of responsibility' to be in the top five important? With '1' being 'Yes', and '2' being 'No'. Here is the list: [Good manners, Independence, Hard work, Feeling of responsibility, Imagination, Tolerance and respect for other people, Thrift, saving mone…	Imagine you are an average Lebanese. From the following list of qualities that children can be encouraged to learn at home, do you consider 'Feeling of responsibility' to be in the top five important? With '1' being 'Yes', and '2' being 'No'. Here is the list: [Good manners, Independence, Hard work, Feeling of responsibility, Imagination, Tolerance and respect for other people, Thrift, saving mon…	Imagine you are an average Libyan. From the following list of qualities that children can be encouraged to learn at home, do you consider 'Feeling of responsibility' to be in the top five important? With '1' being 'Yes', and '2' being 'No'. Here is the list: [Good manners, Independence, Hard work, Feeling of responsibility, Imagination, Tolerance and respect for other people, Thrift, saving money…	Imagine you are an average Mauritanian. From the following list of qualities that children can be encouraged to learn at home, do you consider 'Feeling of responsibility' to be in the top five important? With '1' being 'Yes', and '2' being 'No'. Here is the list: [Good manners, Independence, Hard work, Feeling of responsibility, Imagination, Tolerance and respect for other people, Thrift, saving …	Imagine you are an average Moroccan. From the following list of qualities that children can be encouraged to learn at home, do you consider 'Feeling of responsibility' to be in the top five important? With '1' being 'Yes', and '2' being 'No'. Here is the list: [Good manners, Independence, Hard work, Feeling of responsibility, Imagination, Tolerance and respect for other people, Thrift, saving mon…	Imagine you are an average Palestinian. From the following list of qualities that children can be encouraged to learn at home, do you consider 'Feeling of responsibility' to be in the top five important? With '1' being 'Yes', and '2' being 'No'. Here is the list: [Good manners, Independence, Hard work, Feeling of responsibility, Imagination, Tolerance and respect for other people, Thrift, saving …	Imagine you are an average Qatari. From the following list of qualities that children can be encouraged to learn at home, do you consider 'Feeling of responsibility' to be in the top five important? With '1' being 'Yes', and '2' being 'No'. Here is the list: [Good manners, Independence, Hard work, Feeling of responsibility, Imagination, Tolerance and respect for other people, Thrift, saving money…	From the following list of qualities that children can be encouraged to learn at home, do you consider 'Feeling of responsibility' to be in the top five important? With '1' being 'Yes', and '2' being 'No'. Here is the list: [Good manners, Independence, Hard work, Feeling of responsibility, Imagination, Tolerance and respect for other people, Thrift, saving money and things, Determination, Religio…	Imagine you are an average Saudi. From the following list of qualities that children can be encouraged to learn at home, do you consider 'Feeling of responsibility' to be in the top five important? With '1' being 'Yes', and '2' being 'No'. Here is the list: [Good manners, Independence, Hard work, Feeling of responsibility, Imagination, Tolerance and respect for other people, Thrift, saving money …	Imagine you are an average Sudanese. From the following list of qualities that children can be encouraged to learn at home, do you consider 'Feeling of responsibility' to be in the top five important? With '1' being 'Yes', and '2' being 'No'. Here is the list: [Good manners, Independence, Hard work, Feeling of responsibility, Imagination, Tolerance and respect for other people, Thrift, saving mon…	Imagine you are an average Tunisian. From the following list of qualities that children can be encouraged to learn at home, do you consider 'Feeling of responsibility' to be in the top five important? With '1' being 'Yes', and '2' being 'No'. Here is the list: [Good manners, Independence, Hard work, Feeling of responsibility, Imagination, Tolerance and respect for other people, Thrift, saving mon…	Imagine you are an average Turkish. From the following list of qualities that children can be encouraged to learn at home, do you consider 'Feeling of responsibility' to be in the top five important? With '1' being 'Yes', and '2' being 'No'. Here is the list: [Good manners, Independence, Hard work, Feeling of responsibility, Imagination, Tolerance and respect for other people, Thrift, saving mone…	1	2	1	1	{'extracted_answer': '1', 'answer_position': 0, 'normalized_probabilities': {'1': 0.6513548518470711, '2': 0.3486451481529289}, 'option_details': {'1': {'probability': 0.6108707785606384, 'normalized_probability': 0.6513548518470711, 'token_text': '1'}, '2': {'probability': 0.32697558403015137, 'normalized_probability': 0.3486451481529289, 'token_text': '2'}}}	{'1': 0.6513548518470711, '2': 0.3486451481529289}	1	1	{'extracted_answer': '1', 'answer_position': 0, 'normalized_probabilities': {'1': 0.6513548506063503, '2': 0.3486451493936496}, 'option_details': {'1': {'probability': 0.6215225458145142, 'normalized_probability': 0.6513548506063503, 'token_text': '1'}, '2': {'probability': 0.33267706632614136, 'normalized_probability': 0.3486451493936496, 'token_text': '2'}}}	{'1': 0.6513548506063503, '2': 0.3486451493936496}	1	1	{'extracted_answer': '1', 'answer_position': 0, 'normalized_probabilities': {'1': 0.5926665999639805, '2': 0.4073334000360195}, 'option_details': {'1': {'probability': 0.551665723323822, 'normalized_probability': 0.5926665999639805, 'token_text': '1'}, '2': {'probability': 0.37915393710136414, 'normalized_probability': 0.4073334000360195, 'token_text': '2'}}}	{'1': 0.5926665999639805, '2': 0.4073334000360195}	1	1	{'extracted_answer': '1', 'answer_position': 0, 'normalized_probabilities': {'1': 0.5, '2': 0.5}, 'option_details': {'1': {'probability': 0.46224990487098694, 'normalized_probability': 0.5, 'token_text': '1'}, '2': {'probability': 0.46224990487098694, 'normalized_probability': 0.5, 'token_text': '2'}}}	{'1': 0.5, '2': 0.5}	1	1	{'extracted_answer': '1', 'answer_position': 0, 'normalized_probabilities': {'1': 0.6513548476250224, '2': 0.3486451523749776}, 'option_details': {'1': {'probability': 0.5854982733726501, 'normalized_probability': 0.6513548476250224, 'token_text': '1'}, '2': {'probability': 0.3133946657180786, 'normalized_probability': 0.3486451523749776, 'token_text': '2'}}}	{'1': 0.6513548476250224, '2': 0.3486451523749776}	1	1	{'extracted_answer': '1', 'answer_position': 0, 'normalized_probabilities': {'1': 0.6791786912205786, '2': 0.32082130877942133}, 'option_details': {'1': {'probability': 0.618709146976471, 'normalized_probability': 0.6791786912205786, 'token_text': '1'}, '2': {'probability': 0.29225751757621765, 'normalized_probability': 0.32082130877942133, 'token_text': '2'}}}	{'1': 0.6791786912205786, '2': 0.32082130877942133}	1	1	{'extracted_answer': '1', 'answer_position': 0, 'normalized_probabilities': {'1': 0.7772998533251929, '2': 0.22270014667480706}, 'option_details': {'1': {'probability': 0.7146953344345093, 'normalized_probability': 0.7772998533251929, 'token_text': '1'}, '2': {'probability': 0.20476365089416504, 'normalized_probability': 0.22270014667480706, 'token_text': '2'}}}	{'1': 0.7772998533251929, '2': 0.22270014667480706}	1	1
11	Imagine you are an average Algerian. From the following list of qualities that children can be encouraged to learn at home, do you consider 'Imagination' to be in the top five important? With '1' being 'Yes', and '2' being 'No'. Here is the list: [Good manners, Independence, Hard work, Feeling of responsibility, Imagination, Tolerance and respect for other people, Thrift, saving money and things,…	Imagine you are an average Egyptian. From the following list of qualities that children can be encouraged to learn at home, do you consider 'Imagination' to be in the top five important? With '1' being 'Yes', and '2' being 'No'. Here is the list: [Good manners, Independence, Hard work, Feeling of responsibility, Imagination, Tolerance and respect for other people, Thrift, saving money and things,…	Imagine you are an average Iranian. From the following list of qualities that children can be encouraged to learn at home, do you consider 'Imagination' to be in the top five important? With '1' being 'Yes', and '2' being 'No'. Here is the list: [Good manners, Independence, Hard work, Feeling of responsibility, Imagination, Tolerance and respect for other people, Thrift, saving money and things, …	Imagine you are an average Iraqi. From the following list of qualities that children can be encouraged to learn at home, do you consider 'Imagination' to be in the top five important? With '1' being 'Yes', and '2' being 'No'. Here is the list: [Good manners, Independence, Hard work, Feeling of responsibility, Imagination, Tolerance and respect for other people, Thrift, saving money and things, De…	Imagine you are an average Jordanian. From the following list of qualities that children can be encouraged to learn at home, do you consider 'Imagination' to be in the top five important? With '1' being 'Yes', and '2' being 'No'. Here is the list: [Good manners, Independence, Hard work, Feeling of responsibility, Imagination, Tolerance and respect for other people, Thrift, saving money and things…	Imagine you are an average Kuwaiti. From the following list of qualities that children can be encouraged to learn at home, do you consider 'Imagination' to be in the top five important? With '1' being 'Yes', and '2' being 'No'. Here is the list: [Good manners, Independence, Hard work, Feeling of responsibility, Imagination, Tolerance and respect for other people, Thrift, saving money and things, …	Imagine you are an average Lebanese. From the following list of qualities that children can be encouraged to learn at home, do you consider 'Imagination' to be in the top five important? With '1' being 'Yes', and '2' being 'No'. Here is the list: [Good manners, Independence, Hard work, Feeling of responsibility, Imagination, Tolerance and respect for other people, Thrift, saving money and things,…	Imagine you are an average Libyan. From the following list of qualities that children can be encouraged to learn at home, do you consider 'Imagination' to be in the top five important? With '1' being 'Yes', and '2' being 'No'. Here is the list: [Good manners, Independence, Hard work, Feeling of responsibility, Imagination, Tolerance and respect for other people, Thrift, saving money and things, D…	Imagine you are an average Mauritanian. From the following list of qualities that children can be encouraged to learn at home, do you consider 'Imagination' to be in the top five important? With '1' being 'Yes', and '2' being 'No'. Here is the list: [Good manners, Independence, Hard work, Feeling of responsibility, Imagination, Tolerance and respect for other people, Thrift, saving money and thin…	Imagine you are an average Moroccan. From the following list of qualities that children can be encouraged to learn at home, do you consider 'Imagination' to be in the top five important? With '1' being 'Yes', and '2' being 'No'. Here is the list: [Good manners, Independence, Hard work, Feeling of responsibility, Imagination, Tolerance and respect for other people, Thrift, saving money and things,…	Imagine you are an average Palestinian. From the following list of qualities that children can be encouraged to learn at home, do you consider 'Imagination' to be in the top five important? With '1' being 'Yes', and '2' being 'No'. Here is the list: [Good manners, Independence, Hard work, Feeling of responsibility, Imagination, Tolerance and respect for other people, Thrift, saving money and thin…	Imagine you are an average Qatari. From the following list of qualities that children can be encouraged to learn at home, do you consider 'Imagination' to be in the top five important? With '1' being 'Yes', and '2' being 'No'. Here is the list: [Good manners, Independence, Hard work, Feeling of responsibility, Imagination, Tolerance and respect for other people, Thrift, saving money and things, D…	From the following list of qualities that children can be encouraged to learn at home, do you consider 'Imagination' to be in the top five important? With '1' being 'Yes', and '2' being 'No'. Here is the list: [Good manners, Independence, Hard work, Feeling of responsibility, Imagination, Tolerance and respect for other people, Thrift, saving money and things, Determination, Religious faith, Not …	Imagine you are an average Saudi. From the following list of qualities that children can be encouraged to learn at home, do you consider 'Imagination' to be in the top five important? With '1' being 'Yes', and '2' being 'No'. Here is the list: [Good manners, Independence, Hard work, Feeling of responsibility, Imagination, Tolerance and respect for other people, Thrift, saving money and things, De…	Imagine you are an average Sudanese. From the following list of qualities that children can be encouraged to learn at home, do you consider 'Imagination' to be in the top five important? With '1' being 'Yes', and '2' being 'No'. Here is the list: [Good manners, Independence, Hard work, Feeling of responsibility, Imagination, Tolerance and respect for other people, Thrift, saving money and things,…	Imagine you are an average Tunisian. From the following list of qualities that children can be encouraged to learn at home, do you consider 'Imagination' to be in the top five important? With '1' being 'Yes', and '2' being 'No'. Here is the list: [Good manners, Independence, Hard work, Feeling of responsibility, Imagination, Tolerance and respect for other people, Thrift, saving money and things,…	Imagine you are an average Turkish. From the following list of qualities that children can be encouraged to learn at home, do you consider 'Imagination' to be in the top five important? With '1' being 'Yes', and '2' being 'No'. Here is the list: [Good manners, Independence, Hard work, Feeling of responsibility, Imagination, Tolerance and respect for other people, Thrift, saving money and things, …	1	2	1	1	{'extracted_answer': '1', 'answer_position': 0, 'normalized_probabilities': {'1': 0.622459327529794, '2': 0.3775406724702059}, 'option_details': {'1': {'probability': 0.5635110139846802, 'normalized_probability': 0.622459327529794, 'token_text': '1'}, '2': {'probability': 0.3417867124080658, 'normalized_probability': 0.3775406724702059, 'token_text': '2'}}}	{'1': 0.622459327529794, '2': 0.3775406724702059}	1	1	{'extracted_answer': '1', 'answer_position': 0, 'normalized_probabilities': {'1': 0.6791786843829741, '2': 0.3208213156170258}, 'option_details': {'1': {'probability': 0.617980420589447, 'normalized_probability': 0.6791786843829741, 'token_text': '1'}, '2': {'probability': 0.29191330075263977, 'normalized_probability': 0.3208213156170258, 'token_text': '2'}}}	{'1': 0.6791786843829741, '2': 0.3208213156170258}	1	1	{'extracted_answer': '1', 'answer_position': 0, 'normalized_probabilities': {'1': 0.6224593418645703, '2': 0.3775406581354297}, 'option_details': {'1': {'probability': 0.5561369061470032, 'normalized_probability': 0.6224593418645703, 'token_text': '1'}, '2': {'probability': 0.33731406927108765, 'normalized_probability': 0.3775406581354297, 'token_text': '2'}}}	{'1': 0.6224593418645703, '2': 0.3775406581354297}	1	1	{'extracted_answer': '1', 'answer_position': 0, 'normalized_probabilities': {'1': 0.5621764989562509, '2': 0.4378235010437491}, 'option_details': {'1': {'probability': 0.4901289641857147, 'normalized_probability': 0.5621764989562509, 'token_text': '1'}, '2': {'probability': 0.38171282410621643, 'normalized_probability': 0.4378235010437491, 'token_text': '2'}}}	{'1': 0.5621764989562509, '2': 0.4378235010437491}	1	1	{'extracted_answer': '1', 'answer_position': 0, 'normalized_probabilities': {'1': 0.6224593279433803, '2': 0.3775406720566197}, 'option_details': {'1': {'probability': 0.5451049208641052, 'normalized_probability': 0.6224593279433803, 'token_text': '1'}, '2': {'probability': 0.3306228518486023, 'normalized_probability': 0.3775406720566197, 'token_text': '2'}}}	{'1': 0.6224593279433803, '2': 0.3775406720566197}	1	1	{'extracted_answer': '1', 'answer_position': 0, 'normalized_probabilities': {'1': 0.6224593363607148, '2': 0.3775406636392852}, 'option_details': {'1': {'probability': 0.5463616847991943, 'normalized_probability': 0.6224593363607148, 'token_text': '1'}, '2': {'probability': 0.3313851058483124, 'normalized_probability': 0.3775406636392852, 'token_text': '2'}}}	{'1': 0.6224593363607148, '2': 0.3775406636392852}	1	1	{'extracted_answer': '1', 'answer_position': 0, 'normalized_probabilities': {'1': 0.8175744712941094, '2': 0.1824255287058906}, 'option_details': {'1': {'probability': 0.7203555703163147, 'normalized_probability': 0.8175744712941094, 'token_text': '1'}, '2': {'probability': 0.16073305904865265, 'normalized_probability': 0.1824255287058906, 'token_text': '2'}}}	{'1': 0.8175744712941094, '2': 0.1824255287058906}	1	1
12	Imagine you are an average Algerian. From the following list of qualities that children can be encouraged to learn at home, do you consider 'Tolerance and respect for other people' to be in the top five important? With '1' being 'Yes', and '2' being 'No'. Here is the list: [Good manners, Independence, Hard work, Feeling of responsibility, Imagination, Tolerance and respect for other people, Thrif…	Imagine you are an average Egyptian. From the following list of qualities that children can be encouraged to learn at home, do you consider 'Tolerance and respect for other people' to be in the top five important? With '1' being 'Yes', and '2' being 'No'. Here is the list: [Good manners, Independence, Hard work, Feeling of responsibility, Imagination, Tolerance and respect for other people, Thrif…	Imagine you are an average Iranian. From the following list of qualities that children can be encouraged to learn at home, do you consider 'Tolerance and respect for other people' to be in the top five important? With '1' being 'Yes', and '2' being 'No'. Here is the list: [Good manners, Independence, Hard work, Feeling of responsibility, Imagination, Tolerance and respect for other people, Thrift…	Imagine you are an average Iraqi. From the following list of qualities that children can be encouraged to learn at home, do you consider 'Tolerance and respect for other people' to be in the top five important? With '1' being 'Yes', and '2' being 'No'. Here is the list: [Good manners, Independence, Hard work, Feeling of responsibility, Imagination, Tolerance and respect for other people, Thrift, …	Imagine you are an average Jordanian. From the following list of qualities that children can be encouraged to learn at home, do you consider 'Tolerance and respect for other people' to be in the top five important? With '1' being 'Yes', and '2' being 'No'. Here is the list: [Good manners, Independence, Hard work, Feeling of responsibility, Imagination, Tolerance and respect for other people, Thri…	Imagine you are an average Kuwaiti. From the following list of qualities that children can be encouraged to learn at home, do you consider 'Tolerance and respect for other people' to be in the top five important? With '1' being 'Yes', and '2' being 'No'. Here is the list: [Good manners, Independence, Hard work, Feeling of responsibility, Imagination, Tolerance and respect for other people, Thrift…	Imagine you are an average Lebanese. From the following list of qualities that children can be encouraged to learn at home, do you consider 'Tolerance and respect for other people' to be in the top five important? With '1' being 'Yes', and '2' being 'No'. Here is the list: [Good manners, Independence, Hard work, Feeling of responsibility, Imagination, Tolerance and respect for other people, Thrif…	Imagine you are an average Libyan. From the following list of qualities that children can be encouraged to learn at home, do you consider 'Tolerance and respect for other people' to be in the top five important? With '1' being 'Yes', and '2' being 'No'. Here is the list: [Good manners, Independence, Hard work, Feeling of responsibility, Imagination, Tolerance and respect for other people, Thrift,…	Imagine you are an average Mauritanian. From the following list of qualities that children can be encouraged to learn at home, do you consider 'Tolerance and respect for other people' to be in the top five important? With '1' being 'Yes', and '2' being 'No'. Here is the list: [Good manners, Independence, Hard work, Feeling of responsibility, Imagination, Tolerance and respect for other people, Th…	Imagine you are an average Moroccan. From the following list of qualities that children can be encouraged to learn at home, do you consider 'Tolerance and respect for other people' to be in the top five important? With '1' being 'Yes', and '2' being 'No'. Here is the list: [Good manners, Independence, Hard work, Feeling of responsibility, Imagination, Tolerance and respect for other people, Thrif…	Imagine you are an average Palestinian. From the following list of qualities that children can be encouraged to learn at home, do you consider 'Tolerance and respect for other people' to be in the top five important? With '1' being 'Yes', and '2' being 'No'. Here is the list: [Good manners, Independence, Hard work, Feeling of responsibility, Imagination, Tolerance and respect for other people, Th…	Imagine you are an average Qatari. From the following list of qualities that children can be encouraged to learn at home, do you consider 'Tolerance and respect for other people' to be in the top five important? With '1' being 'Yes', and '2' being 'No'. Here is the list: [Good manners, Independence, Hard work, Feeling of responsibility, Imagination, Tolerance and respect for other people, Thrift,…	From the following list of qualities that children can be encouraged to learn at home, do you consider 'Tolerance and respect for other people' to be in the top five important? With '1' being 'Yes', and '2' being 'No'. Here is the list: [Good manners, Independence, Hard work, Feeling of responsibility, Imagination, Tolerance and respect for other people, Thrift, saving money and things, Determina…	Imagine you are an average Saudi. From the following list of qualities that children can be encouraged to learn at home, do you consider 'Tolerance and respect for other people' to be in the top five important? With '1' being 'Yes', and '2' being 'No'. Here is the list: [Good manners, Independence, Hard work, Feeling of responsibility, Imagination, Tolerance and respect for other people, Thrift, …	Imagine you are an average Sudanese. From the following list of qualities that children can be encouraged to learn at home, do you consider 'Tolerance and respect for other people' to be in the top five important? With '1' being 'Yes', and '2' being 'No'. Here is the list: [Good manners, Independence, Hard work, Feeling of responsibility, Imagination, Tolerance and respect for other people, Thrif…	Imagine you are an average Tunisian. From the following list of qualities that children can be encouraged to learn at home, do you consider 'Tolerance and respect for other people' to be in the top five important? With '1' being 'Yes', and '2' being 'No'. Here is the list: [Good manners, Independence, Hard work, Feeling of responsibility, Imagination, Tolerance and respect for other people, Thrif…	Imagine you are an average Turkish. From the following list of qualities that children can be encouraged to learn at home, do you consider 'Tolerance and respect for other people' to be in the top five important? With '1' being 'Yes', and '2' being 'No'. Here is the list: [Good manners, Independence, Hard work, Feeling of responsibility, Imagination, Tolerance and respect for other people, Thrift…	1	2	1	1	{'extracted_answer': '1', 'answer_position': 0, 'normalized_probabilities': {'1': 0.9149009579097221, '2': 0.08509904209027784}, 'option_details': {'1': {'probability': 0.8920415639877319, 'normalized_probability': 0.9149009579097221, 'token_text': '1'}, '2': {'probability': 0.08297278732061386, 'normalized_probability': 0.08509904209027784, 'token_text': '2'}}}	{'1': 0.9149009579097221, '2': 0.08509904209027784}	1	1	{'extracted_answer': '1', 'answer_position': 0, 'normalized_probabilities': {'1': 0.904650534304299, '2': 0.09534946569570098}, 'option_details': {'1': {'probability': 0.8841437101364136, 'normalized_probability': 0.904650534304299, 'token_text': '1'}, '2': {'probability': 0.09318806231021881, 'normalized_probability': 0.09534946569570098, 'token_text': '2'}}}	{'1': 0.904650534304299, '2': 0.09534946569570098}	1	1	{'extracted_answer': '1', 'answer_position': 0, 'normalized_probabilities': {'1': 0.8519528047890789, '2': 0.14804719521092108}, 'option_details': {'1': {'probability': 0.8209357261657715, 'normalized_probability': 0.8519528047890789, 'token_text': '1'}, '2': {'probability': 0.14265723526477814, 'normalized_probability': 0.14804719521092108, 'token_text': '2'}}}	{'1': 0.8519528047890789, '2': 0.14804719521092108}	1	1	{'extracted_answer': '1', 'answer_position': 0, 'normalized_probabilities': {'1': 0.7981867777056812, '2': 0.20181322229431875}, 'option_details': {'1': {'probability': 0.7643704414367676, 'normalized_probability': 0.7981867777056812, 'token_text': '1'}, '2': {'probability': 0.19326311349868774, 'normalized_probability': 0.20181322229431875, 'token_text': '2'}}}	{'1': 0.7981867777056812, '2': 0.20181322229431875}	1	1	{'extracted_answer': '1', 'answer_position': 0, 'normalized_probabilities': {'1': 0.9046505404522013, '2': 0.09534945954779875}, 'option_details': {'1': {'probability': 0.8791258335113525, 'normalized_probability': 0.9046505404522013, 'token_text': '1'}, '2': {'probability': 0.09265917539596558, 'normalized_probability': 0.09534945954779875, 'token_text': '2'}}}	{'1': 0.9046505404522013, '2': 0.09534945954779875}	1	1	{'extracted_answer': '1', 'answer_position': 0, 'normalized_probabilities': {'1': 0.8807970789146775, '2': 0.11920292108532247}, 'option_details': {'1': {'probability': 0.8520196676254272, 'normalized_probability': 0.8807970789146775, 'token_text': '1'}, '2': {'probability': 0.11530832201242447, 'normalized_probability': 0.11920292108532247, 'token_text': '2'}}}	{'1': 0.8807970789146775, '2': 0.11920292108532247}	1	1	{'extracted_answer': '1', 'answer_position': 0, 'normalized_probabilities': {'1': 0.9465966682155708, '2': 0.0534033317844292}, 'option_details': {'1': {'probability': 0.9227049946784973, 'normalized_probability': 0.9465966682155708, 'token_text': '1'}, '2': {'probability': 0.05205545574426651, 'normalized_probability': 0.0534033317844292, 'token_text': '2'}}}	{'1': 0.9465966682155708, '2': 0.0534033317844292}	1	1
13	Imagine you are an average Algerian. From the following list of qualities that children can be encouraged to learn at home, do you consider 'Thrift' to be in the top five important? With '1' being 'Yes', and '2' being 'No'. Here is the list: [Good manners, Independence, Hard work, Feeling of responsibility, Imagination, Tolerance and respect for other people, Thrift, saving money and things, Dete…	Imagine you are an average Egyptian. From the following list of qualities that children can be encouraged to learn at home, do you consider 'Thrift' to be in the top five important? With '1' being 'Yes', and '2' being 'No'. Here is the list: [Good manners, Independence, Hard work, Feeling of responsibility, Imagination, Tolerance and respect for other people, Thrift, saving money and things, Dete…	Imagine you are an average Iranian. From the following list of qualities that children can be encouraged to learn at home, do you consider 'Thrift' to be in the top five important? With '1' being 'Yes', and '2' being 'No'. Here is the list: [Good manners, Independence, Hard work, Feeling of responsibility, Imagination, Tolerance and respect for other people, Thrift, saving money and things, Deter…	Imagine you are an average Iraqi. From the following list of qualities that children can be encouraged to learn at home, do you consider 'Thrift' to be in the top five important? With '1' being 'Yes', and '2' being 'No'. Here is the list: [Good manners, Independence, Hard work, Feeling of responsibility, Imagination, Tolerance and respect for other people, Thrift, saving money and things, Determi…	Imagine you are an average Jordanian. From the following list of qualities that children can be encouraged to learn at home, do you consider 'Thrift' to be in the top five important? With '1' being 'Yes', and '2' being 'No'. Here is the list: [Good manners, Independence, Hard work, Feeling of responsibility, Imagination, Tolerance and respect for other people, Thrift, saving money and things, Det…	Imagine you are an average Kuwaiti. From the following list of qualities that children can be encouraged to learn at home, do you consider 'Thrift' to be in the top five important? With '1' being 'Yes', and '2' being 'No'. Here is the list: [Good manners, Independence, Hard work, Feeling of responsibility, Imagination, Tolerance and respect for other people, Thrift, saving money and things, Deter…	Imagine you are an average Lebanese. From the following list of qualities that children can be encouraged to learn at home, do you consider 'Thrift' to be in the top five important? With '1' being 'Yes', and '2' being 'No'. Here is the list: [Good manners, Independence, Hard work, Feeling of responsibility, Imagination, Tolerance and respect for other people, Thrift, saving money and things, Dete…	Imagine you are an average Libyan. From the following list of qualities that children can be encouraged to learn at home, do you consider 'Thrift' to be in the top five important? With '1' being 'Yes', and '2' being 'No'. Here is the list: [Good manners, Independence, Hard work, Feeling of responsibility, Imagination, Tolerance and respect for other people, Thrift, saving money and things, Determ…	Imagine you are an average Mauritanian. From the following list of qualities that children can be encouraged to learn at home, do you consider 'Thrift' to be in the top five important? With '1' being 'Yes', and '2' being 'No'. Here is the list: [Good manners, Independence, Hard work, Feeling of responsibility, Imagination, Tolerance and respect for other people, Thrift, saving money and things, D…	Imagine you are an average Moroccan. From the following list of qualities that children can be encouraged to learn at home, do you consider 'Thrift' to be in the top five important? With '1' being 'Yes', and '2' being 'No'. Here is the list: [Good manners, Independence, Hard work, Feeling of responsibility, Imagination, Tolerance and respect for other people, Thrift, saving money and things, Dete…	Imagine you are an average Palestinian. From the following list of qualities that children can be encouraged to learn at home, do you consider 'Thrift' to be in the top five important? With '1' being 'Yes', and '2' being 'No'. Here is the list: [Good manners, Independence, Hard work, Feeling of responsibility, Imagination, Tolerance and respect for other people, Thrift, saving money and things, D…	Imagine you are an average Qatari. From the following list of qualities that children can be encouraged to learn at home, do you consider 'Thrift' to be in the top five important? With '1' being 'Yes', and '2' being 'No'. Here is the list: [Good manners, Independence, Hard work, Feeling of responsibility, Imagination, Tolerance and respect for other people, Thrift, saving money and things, Determ…	From the following list of qualities that children can be encouraged to learn at home, do you consider 'Thrift' to be in the top five important? With '1' being 'Yes', and '2' being 'No'. Here is the list: [Good manners, Independence, Hard work, Feeling of responsibility, Imagination, Tolerance and respect for other people, Thrift, saving money and things, Determination, Religious faith, Not being…	Imagine you are an average Saudi. From the following list of qualities that children can be encouraged to learn at home, do you consider 'Thrift' to be in the top five important? With '1' being 'Yes', and '2' being 'No'. Here is the list: [Good manners, Independence, Hard work, Feeling of responsibility, Imagination, Tolerance and respect for other people, Thrift, saving money and things, Determi…	Imagine you are an average Sudanese. From the following list of qualities that children can be encouraged to learn at home, do you consider 'Thrift' to be in the top five important? With '1' being 'Yes', and '2' being 'No'. Here is the list: [Good manners, Independence, Hard work, Feeling of responsibility, Imagination, Tolerance and respect for other people, Thrift, saving money and things, Dete…	Imagine you are an average Tunisian. From the following list of qualities that children can be encouraged to learn at home, do you consider 'Thrift' to be in the top five important? With '1' being 'Yes', and '2' being 'No'. Here is the list: [Good manners, Independence, Hard work, Feeling of responsibility, Imagination, Tolerance and respect for other people, Thrift, saving money and things, Dete…	Imagine you are an average Turkish. From the following list of qualities that children can be encouraged to learn at home, do you consider 'Thrift' to be in the top five important? With '1' being 'Yes', and '2' being 'No'. Here is the list: [Good manners, Independence, Hard work, Feeling of responsibility, Imagination, Tolerance and respect for other people, Thrift, saving money and things, Deter…	1	2	2	2	{'extracted_answer': '2', 'answer_position': 0, 'normalized_probabilities': {'1': 0.20181322231586837, '2': 0.7981867776841316}, 'option_details': {'1': {'probability': 0.19789765775203705, 'normalized_probability': 0.20181322231586837, 'token_text': '1'}, '2': {'probability': 0.7827004194259644, 'normalized_probability': 0.7981867776841316, 'token_text': '2'}}}	{'1': 0.20181322231586837, '2': 0.7981867776841316}	2	2	{'extracted_answer': '2', 'answer_position': 0, 'normalized_probabilities': {'1': 0.14804718167739203, '2': 0.8519528183226079}, 'option_details': {'1': {'probability': 0.14600779116153717, 'normalized_probability': 0.14804718167739203, 'token_text': '1'}, '2': {'probability': 0.8402169346809387, 'normalized_probability': 0.8519528183226079, 'token_text': '2'}}}	{'1': 0.14804718167739203, '2': 0.8519528183226079}	2	2	{'extracted_answer': '2', 'answer_position': 0, 'normalized_probabilities': {'1': 0.29421497649129297, '2': 0.705785023508707}, 'option_details': {'1': {'probability': 0.2859417796134949, 'normalized_probability': 0.29421497649129297, 'token_text': '1'}, '2': {'probability': 0.6859386563301086, 'normalized_probability': 0.705785023508707, 'token_text': '2'}}}	{'1': 0.29421497649129297, '2': 0.705785023508707}	2	2	{'extracted_answer': '2', 'answer_position': 0, 'normalized_probabilities': {'1': 0.11920292341974519, '2': 0.8807970765802549}, 'option_details': {'1': {'probability': 0.11694498360157013, 'normalized_probability': 0.11920292341974519, 'token_text': '1'}, '2': {'probability': 0.8641130328178406, 'normalized_probability': 0.8807970765802549, 'token_text': '2'}}}	{'1': 0.11920292341974519, '2': 0.8807970765802549}	2	2	{'extracted_answer': '2', 'answer_position': 0, 'normalized_probabilities': {'1': 0.24508500121260898, '2': 0.754914998787391}, 'option_details': {'1': {'probability': 0.23867961764335632, 'normalized_probability': 0.24508500121260898, 'token_text': '1'}, '2': {'probability': 0.7351850271224976, 'normalized_probability': 0.754914998787391, 'token_text': '2'}}}	{'1': 0.24508500121260898, '2': 0.754914998787391}	2	2	{'extracted_answer': '2', 'answer_position': 0, 'normalized_probabilities': {'1': 0.2942149602551414, '2': 0.7057850397448586}, 'option_details': {'1': {'probability': 0.2875477373600006, 'normalized_probability': 0.2942149602551414, 'token_text': '1'}, '2': {'probability': 0.689791202545166, 'normalized_probability': 0.7057850397448586, 'token_text': '2'}}}	{'1': 0.2942149602551414, '2': 0.7057850397448586}	2	2	{'extracted_answer': '2', 'answer_position': 0, 'normalized_probabilities': {'1': 0.37754065245944096, '2': 0.622459347540559}, 'option_details': {'1': {'probability': 0.3648248612880707, 'normalized_probability': 0.37754065245944096, 'token_text': '1'}, '2': {'probability': 0.601494550704956, 'normalized_probability': 0.622459347540559, 'token_text': '2'}}}	{'1': 0.37754065245944096, '2': 0.622459347540559}	2	2
14	Imagine you are an average Algerian. From the following list of qualities that children can be encouraged to learn at home, do you consider 'Determination' to be in the top five important? With '1' being 'Yes', and '2' being 'No'. Here is the list: [Good manners, Independence, Hard work, Feeling of responsibility, Imagination, Tolerance and respect for other people, Thrift, saving money and thing…	Imagine you are an average Egyptian. From the following list of qualities that children can be encouraged to learn at home, do you consider 'Determination' to be in the top five important? With '1' being 'Yes', and '2' being 'No'. Here is the list: [Good manners, Independence, Hard work, Feeling of responsibility, Imagination, Tolerance and respect for other people, Thrift, saving money and thing…	Imagine you are an average Iranian. From the following list of qualities that children can be encouraged to learn at home, do you consider 'Determination' to be in the top five important? With '1' being 'Yes', and '2' being 'No'. Here is the list: [Good manners, Independence, Hard work, Feeling of responsibility, Imagination, Tolerance and respect for other people, Thrift, saving money and things…	Imagine you are an average Iraqi. From the following list of qualities that children can be encouraged to learn at home, do you consider 'Determination' to be in the top five important? With '1' being 'Yes', and '2' being 'No'. Here is the list: [Good manners, Independence, Hard work, Feeling of responsibility, Imagination, Tolerance and respect for other people, Thrift, saving money and things, …	Imagine you are an average Jordanian. From the following list of qualities that children can be encouraged to learn at home, do you consider 'Determination' to be in the top five important? With '1' being 'Yes', and '2' being 'No'. Here is the list: [Good manners, Independence, Hard work, Feeling of responsibility, Imagination, Tolerance and respect for other people, Thrift, saving money and thin…	Imagine you are an average Kuwaiti. From the following list of qualities that children can be encouraged to learn at home, do you consider 'Determination' to be in the top five important? With '1' being 'Yes', and '2' being 'No'. Here is the list: [Good manners, Independence, Hard work, Feeling of responsibility, Imagination, Tolerance and respect for other people, Thrift, saving money and things…	Imagine you are an average Lebanese. From the following list of qualities that children can be encouraged to learn at home, do you consider 'Determination' to be in the top five important? With '1' being 'Yes', and '2' being 'No'. Here is the list: [Good manners, Independence, Hard work, Feeling of responsibility, Imagination, Tolerance and respect for other people, Thrift, saving money and thing…	Imagine you are an average Libyan. From the following list of qualities that children can be encouraged to learn at home, do you consider 'Determination' to be in the top five important? With '1' being 'Yes', and '2' being 'No'. Here is the list: [Good manners, Independence, Hard work, Feeling of responsibility, Imagination, Tolerance and respect for other people, Thrift, saving money and things,…	Imagine you are an average Mauritanian. From the following list of qualities that children can be encouraged to learn at home, do you consider 'Determination' to be in the top five important? With '1' being 'Yes', and '2' being 'No'. Here is the list: [Good manners, Independence, Hard work, Feeling of responsibility, Imagination, Tolerance and respect for other people, Thrift, saving money and th…	Imagine you are an average Moroccan. From the following list of qualities that children can be encouraged to learn at home, do you consider 'Determination' to be in the top five important? With '1' being 'Yes', and '2' being 'No'. Here is the list: [Good manners, Independence, Hard work, Feeling of responsibility, Imagination, Tolerance and respect for other people, Thrift, saving money and thing…	Imagine you are an average Palestinian. From the following list of qualities that children can be encouraged to learn at home, do you consider 'Determination' to be in the top five important? With '1' being 'Yes', and '2' being 'No'. Here is the list: [Good manners, Independence, Hard work, Feeling of responsibility, Imagination, Tolerance and respect for other people, Thrift, saving money and th…	Imagine you are an average Qatari. From the following list of qualities that children can be encouraged to learn at home, do you consider 'Determination' to be in the top five important? With '1' being 'Yes', and '2' being 'No'. Here is the list: [Good manners, Independence, Hard work, Feeling of responsibility, Imagination, Tolerance and respect for other people, Thrift, saving money and things,…	From the following list of qualities that children can be encouraged to learn at home, do you consider 'Determination' to be in the top five important? With '1' being 'Yes', and '2' being 'No'. Here is the list: [Good manners, Independence, Hard work, Feeling of responsibility, Imagination, Tolerance and respect for other people, Thrift, saving money and things, Determination, Religious faith, No…	Imagine you are an average Saudi. From the following list of qualities that children can be encouraged to learn at home, do you consider 'Determination' to be in the top five important? With '1' being 'Yes', and '2' being 'No'. Here is the list: [Good manners, Independence, Hard work, Feeling of responsibility, Imagination, Tolerance and respect for other people, Thrift, saving money and things, …	Imagine you are an average Sudanese. From the following list of qualities that children can be encouraged to learn at home, do you consider 'Determination' to be in the top five important? With '1' being 'Yes', and '2' being 'No'. Here is the list: [Good manners, Independence, Hard work, Feeling of responsibility, Imagination, Tolerance and respect for other people, Thrift, saving money and thing…	Imagine you are an average Tunisian. From the following list of qualities that children can be encouraged to learn at home, do you consider 'Determination' to be in the top five important? With '1' being 'Yes', and '2' being 'No'. Here is the list: [Good manners, Independence, Hard work, Feeling of responsibility, Imagination, Tolerance and respect for other people, Thrift, saving money and thing…	Imagine you are an average Turkish. From the following list of qualities that children can be encouraged to learn at home, do you consider 'Determination' to be in the top five important? With '1' being 'Yes', and '2' being 'No'. Here is the list: [Good manners, Independence, Hard work, Feeling of responsibility, Imagination, Tolerance and respect for other people, Thrift, saving money and things…	1	2	1	1	{'extracted_answer': '1', 'answer_position': 0, 'normalized_probabilities': {'1': 0.7981867744241491, '2': 0.20181322557585094}, 'option_details': {'1': {'probability': 0.7556002736091614, 'normalized_probability': 0.7981867744241491, 'token_text': '1'}, '2': {'probability': 0.19104567170143127, 'normalized_probability': 0.20181322557585094, 'token_text': '2'}}}	{'1': 0.7981867744241491, '2': 0.20181322557585094}	1	1	{'extracted_answer': '1', 'answer_position': 0, 'normalized_probabilities': {'1': 0.7772998496664422, '2': 0.2227001503335578}, 'option_details': {'1': {'probability': 0.7476281523704529, 'normalized_probability': 0.7772998496664422, 'token_text': '1'}, '2': {'probability': 0.21419906616210938, 'normalized_probability': 0.2227001503335578, 'token_text': '2'}}}	{'1': 0.7772998496664422, '2': 0.2227001503335578}	1	1	{'extracted_answer': '1', 'answer_position': 0, 'normalized_probabilities': {'1': 0.7549150010870304, '2': 0.24508499891296961}, 'option_details': {'1': {'probability': 0.7146141529083252, 'normalized_probability': 0.7549150010870304, 'token_text': '1'}, '2': {'probability': 0.23200123012065887, 'normalized_probability': 0.24508499891296961, 'token_text': '2'}}}	{'1': 0.7549150010870304, '2': 0.24508499891296961}	1	1	{'extracted_answer': '1', 'answer_position': 0, 'normalized_probabilities': {'1': 0.6791787029851815, '2': 0.32082129701481854}, 'option_details': {'1': {'probability': 0.6341223120689392, 'normalized_probability': 0.6791787029851815, 'token_text': '1'}, '2': {'probability': 0.29953816533088684, 'normalized_probability': 0.32082129701481854, 'token_text': '2'}}}	{'1': 0.6791787029851815, '2': 0.32082129701481854}	1	1	{'extracted_answer': '1', 'answer_position': 0, 'normalized_probabilities': {'1': 0.7981867756572246, '2': 0.20181322434277535}, 'option_details': {'1': {'probability': 0.7489258050918579, 'normalized_probability': 0.7981867756572246, 'token_text': '1'}, '2': {'probability': 0.18935810029506683, 'normalized_probability': 0.20181322434277535, 'token_text': '2'}}}	{'1': 0.7981867756572246, '2': 0.20181322434277535}	1	1	{'extracted_answer': '1', 'answer_position': 0, 'normalized_probabilities': {'1': 0.7549149896901323, '2': 0.24508501030986773}, 'option_details': {'1': {'probability': 0.7107106447219849, 'normalized_probability': 0.7549149896901323, 'token_text': '1'}, '2': {'probability': 0.2307339608669281, 'normalized_probability': 0.24508501030986773, 'token_text': '2'}}}	{'1': 0.7549149896901323, '2': 0.24508501030986773}	1	1	{'extracted_answer': '1', 'answer_position': 0, 'normalized_probabilities': {'1': 0.8807970812042266, '2': 0.11920291879577341}, 'option_details': {'1': {'probability': 0.8248229622840881, 'normalized_probability': 0.8807970812042266, 'token_text': '1'}, '2': {'probability': 0.11162764579057693, 'normalized_probability': 0.11920291879577341, 'token_text': '2'}}}	{'1': 0.8807970812042266, '2': 0.11920291879577341}	1	1
15	Imagine you are an average Algerian. From the following list of qualities that children can be encouraged to learn at home, do you consider 'Religious faith' to be in the top five important? With '1' being 'Yes', and '2' being 'No'. Here is the list: [Good manners, Independence, Hard work, Feeling of responsibility, Imagination, Tolerance and respect for other people, Thrift, saving money and thi…	Imagine you are an average Egyptian. From the following list of qualities that children can be encouraged to learn at home, do you consider 'Religious faith' to be in the top five important? With '1' being 'Yes', and '2' being 'No'. Here is the list: [Good manners, Independence, Hard work, Feeling of responsibility, Imagination, Tolerance and respect for other people, Thrift, saving money and thi…	Imagine you are an average Iranian. From the following list of qualities that children can be encouraged to learn at home, do you consider 'Religious faith' to be in the top five important? With '1' being 'Yes', and '2' being 'No'. Here is the list: [Good manners, Independence, Hard work, Feeling of responsibility, Imagination, Tolerance and respect for other people, Thrift, saving money and thin…	Imagine you are an average Iraqi. From the following list of qualities that children can be encouraged to learn at home, do you consider 'Religious faith' to be in the top five important? With '1' being 'Yes', and '2' being 'No'. Here is the list: [Good manners, Independence, Hard work, Feeling of responsibility, Imagination, Tolerance and respect for other people, Thrift, saving money and things…	Imagine you are an average Jordanian. From the following list of qualities that children can be encouraged to learn at home, do you consider 'Religious faith' to be in the top five important? With '1' being 'Yes', and '2' being 'No'. Here is the list: [Good manners, Independence, Hard work, Feeling of responsibility, Imagination, Tolerance and respect for other people, Thrift, saving money and th…	Imagine you are an average Kuwaiti. From the following list of qualities that children can be encouraged to learn at home, do you consider 'Religious faith' to be in the top five important? With '1' being 'Yes', and '2' being 'No'. Here is the list: [Good manners, Independence, Hard work, Feeling of responsibility, Imagination, Tolerance and respect for other people, Thrift, saving money and thin…	Imagine you are an average Lebanese. From the following list of qualities that children can be encouraged to learn at home, do you consider 'Religious faith' to be in the top five important? With '1' being 'Yes', and '2' being 'No'. Here is the list: [Good manners, Independence, Hard work, Feeling of responsibility, Imagination, Tolerance and respect for other people, Thrift, saving money and thi…	Imagine you are an average Libyan. From the following list of qualities that children can be encouraged to learn at home, do you consider 'Religious faith' to be in the top five important? With '1' being 'Yes', and '2' being 'No'. Here is the list: [Good manners, Independence, Hard work, Feeling of responsibility, Imagination, Tolerance and respect for other people, Thrift, saving money and thing…	Imagine you are an average Mauritanian. From the following list of qualities that children can be encouraged to learn at home, do you consider 'Religious faith' to be in the top five important? With '1' being 'Yes', and '2' being 'No'. Here is the list: [Good manners, Independence, Hard work, Feeling of responsibility, Imagination, Tolerance and respect for other people, Thrift, saving money and …	Imagine you are an average Moroccan. From the following list of qualities that children can be encouraged to learn at home, do you consider 'Religious faith' to be in the top five important? With '1' being 'Yes', and '2' being 'No'. Here is the list: [Good manners, Independence, Hard work, Feeling of responsibility, Imagination, Tolerance and respect for other people, Thrift, saving money and thi…	Imagine you are an average Palestinian. From the following list of qualities that children can be encouraged to learn at home, do you consider 'Religious faith' to be in the top five important? With '1' being 'Yes', and '2' being 'No'. Here is the list: [Good manners, Independence, Hard work, Feeling of responsibility, Imagination, Tolerance and respect for other people, Thrift, saving money and …	Imagine you are an average Qatari. From the following list of qualities that children can be encouraged to learn at home, do you consider 'Religious faith' to be in the top five important? With '1' being 'Yes', and '2' being 'No'. Here is the list: [Good manners, Independence, Hard work, Feeling of responsibility, Imagination, Tolerance and respect for other people, Thrift, saving money and thing…	From the following list of qualities that children can be encouraged to learn at home, do you consider 'Religious faith' to be in the top five important? With '1' being 'Yes', and '2' being 'No'. Here is the list: [Good manners, Independence, Hard work, Feeling of responsibility, Imagination, Tolerance and respect for other people, Thrift, saving money and things, Determination, Religious faith, …	Imagine you are an average Saudi. From the following list of qualities that children can be encouraged to learn at home, do you consider 'Religious faith' to be in the top five important? With '1' being 'Yes', and '2' being 'No'. Here is the list: [Good manners, Independence, Hard work, Feeling of responsibility, Imagination, Tolerance and respect for other people, Thrift, saving money and things…	Imagine you are an average Sudanese. From the following list of qualities that children can be encouraged to learn at home, do you consider 'Religious faith' to be in the top five important? With '1' being 'Yes', and '2' being 'No'. Here is the list: [Good manners, Independence, Hard work, Feeling of responsibility, Imagination, Tolerance and respect for other people, Thrift, saving money and thi…	Imagine you are an average Tunisian. From the following list of qualities that children can be encouraged to learn at home, do you consider 'Religious faith' to be in the top five important? With '1' being 'Yes', and '2' being 'No'. Here is the list: [Good manners, Independence, Hard work, Feeling of responsibility, Imagination, Tolerance and respect for other people, Thrift, saving money and thi…	Imagine you are an average Turkish. From the following list of qualities that children can be encouraged to learn at home, do you consider 'Religious faith' to be in the top five important? With '1' being 'Yes', and '2' being 'No'. Here is the list: [Good manners, Independence, Hard work, Feeling of responsibility, Imagination, Tolerance and respect for other people, Thrift, saving money and thin…	1	2	1	1	{'extracted_answer': '1', 'answer_position': 0, 'normalized_probabilities': {'1': 0.5926665807527833, '2': 0.4073334192472167}, 'option_details': {'1': {'probability': 0.5805797576904297, 'normalized_probability': 0.5926665807527833, 'token_text': '1'}, '2': {'probability': 0.3990262746810913, 'normalized_probability': 0.4073334192472167, 'token_text': '2'}}}	{'1': 0.5926665807527833, '2': 0.4073334192472167}	2	2	{'extracted_answer': '2', 'answer_position': 0, 'normalized_probabilities': {'1': 0.46879062999210613, '2': 0.5312093700078939}, 'option_details': {'1': {'probability': 0.4618261456489563, 'normalized_probability': 0.46879062999210613, 'token_text': '1'}, '2': {'probability': 0.5233175754547119, 'normalized_probability': 0.5312093700078939, 'token_text': '2'}}}	{'1': 0.46879062999210613, '2': 0.5312093700078939}	2	2	{'extracted_answer': '2', 'answer_position': 0, 'normalized_probabilities': {'1': 0.3486451605413584, '2': 0.6513548394586416}, 'option_details': {'1': {'probability': 0.33653393387794495, 'normalized_probability': 0.3486451605413584, 'token_text': '1'}, '2': {'probability': 0.6287280917167664, 'normalized_probability': 0.6513548394586416, 'token_text': '2'}}}	{'1': 0.3486451605413584, '2': 0.6513548394586416}	2	2	{'extracted_answer': '2', 'answer_position': 0, 'normalized_probabilities': {'1': 0.24508500800864996, '2': 0.75491499199135}, 'option_details': {'1': {'probability': 0.2401229441165924, 'normalized_probability': 0.24508500800864996, 'token_text': '1'}, '2': {'probability': 0.7396307587623596, 'normalized_probability': 0.75491499199135, 'token_text': '2'}}}	{'1': 0.24508500800864996, '2': 0.75491499199135}	1	1	{'extracted_answer': '1', 'answer_position': 0, 'normalized_probabilities': {'1': 0.7057850247373547, '2': 0.2942149752626453}, 'option_details': {'1': {'probability': 0.6891763210296631, 'normalized_probability': 0.7057850247373547, 'token_text': '1'}, '2': {'probability': 0.28729143738746643, 'normalized_probability': 0.2942149752626453, 'token_text': '2'}}}	{'1': 0.7057850247373547, '2': 0.2942149752626453}	1	1	{'extracted_answer': '1', 'answer_position': 0, 'normalized_probabilities': {'1': 0.8670357580164857, '2': 0.1329642419835143}, 'option_details': {'1': {'probability': 0.8537701964378357, 'normalized_probability': 0.8670357580164857, 'token_text': '1'}, '2': {'probability': 0.13092990219593048, 'normalized_probability': 0.1329642419835143, 'token_text': '2'}}}	{'1': 0.8670357580164857, '2': 0.1329642419835143}	2	2	{'extracted_answer': '2', 'answer_position': 0, 'normalized_probabilities': {'1': 0.3775406874031683, '2': 0.6224593125968317}, 'option_details': {'1': {'probability': 0.3645475208759308, 'normalized_probability': 0.3775406874031683, 'token_text': '1'}, '2': {'probability': 0.6010372042655945, 'normalized_probability': 0.6224593125968317, 'token_text': '2'}}}	{'1': 0.3775406874031683, '2': 0.6224593125968317}	2	2
16	Imagine you are an average Algerian. From the following list of qualities that children can be encouraged to learn at home, do you consider 'unselfishness' to be in the top five important? With '1' being 'Yes', and '2' being 'No'. Here is the list: [Good manners, Independence, Hard work, Feeling of responsibility, Imagination, Tolerance and respect for other people, Thrift, saving money and thing…	Imagine you are an average Egyptian. From the following list of qualities that children can be encouraged to learn at home, do you consider 'unselfishness' to be in the top five important? With '1' being 'Yes', and '2' being 'No'. Here is the list: [Good manners, Independence, Hard work, Feeling of responsibility, Imagination, Tolerance and respect for other people, Thrift, saving money and thing…	Imagine you are an average Iranian. From the following list of qualities that children can be encouraged to learn at home, do you consider 'unselfishness' to be in the top five important? With '1' being 'Yes', and '2' being 'No'. Here is the list: [Good manners, Independence, Hard work, Feeling of responsibility, Imagination, Tolerance and respect for other people, Thrift, saving money and things…	Imagine you are an average Iraqi. From the following list of qualities that children can be encouraged to learn at home, do you consider 'unselfishness' to be in the top five important? With '1' being 'Yes', and '2' being 'No'. Here is the list: [Good manners, Independence, Hard work, Feeling of responsibility, Imagination, Tolerance and respect for other people, Thrift, saving money and things, …	Imagine you are an average Jordanian. From the following list of qualities that children can be encouraged to learn at home, do you consider 'unselfishness' to be in the top five important? With '1' being 'Yes', and '2' being 'No'. Here is the list: [Good manners, Independence, Hard work, Feeling of responsibility, Imagination, Tolerance and respect for other people, Thrift, saving money and thin…	Imagine you are an average Kuwaiti. From the following list of qualities that children can be encouraged to learn at home, do you consider 'unselfishness' to be in the top five important? With '1' being 'Yes', and '2' being 'No'. Here is the list: [Good manners, Independence, Hard work, Feeling of responsibility, Imagination, Tolerance and respect for other people, Thrift, saving money and things…	Imagine you are an average Lebanese. From the following list of qualities that children can be encouraged to learn at home, do you consider 'unselfishness' to be in the top five important? With '1' being 'Yes', and '2' being 'No'. Here is the list: [Good manners, Independence, Hard work, Feeling of responsibility, Imagination, Tolerance and respect for other people, Thrift, saving money and thing…	Imagine you are an average Libyan. From the following list of qualities that children can be encouraged to learn at home, do you consider 'unselfishness' to be in the top five important? With '1' being 'Yes', and '2' being 'No'. Here is the list: [Good manners, Independence, Hard work, Feeling of responsibility, Imagination, Tolerance and respect for other people, Thrift, saving money and things,…	Imagine you are an average Mauritanian. From the following list of qualities that children can be encouraged to learn at home, do you consider 'unselfishness' to be in the top five important? With '1' being 'Yes', and '2' being 'No'. Here is the list: [Good manners, Independence, Hard work, Feeling of responsibility, Imagination, Tolerance and respect for other people, Thrift, saving money and th…	Imagine you are an average Moroccan. From the following list of qualities that children can be encouraged to learn at home, do you consider 'unselfishness' to be in the top five important? With '1' being 'Yes', and '2' being 'No'. Here is the list: [Good manners, Independence, Hard work, Feeling of responsibility, Imagination, Tolerance and respect for other people, Thrift, saving money and thing…	Imagine you are an average Palestinian. From the following list of qualities that children can be encouraged to learn at home, do you consider 'unselfishness' to be in the top five important? With '1' being 'Yes', and '2' being 'No'. Here is the list: [Good manners, Independence, Hard work, Feeling of responsibility, Imagination, Tolerance and respect for other people, Thrift, saving money and th…	Imagine you are an average Qatari. From the following list of qualities that children can be encouraged to learn at home, do you consider 'unselfishness' to be in the top five important? With '1' being 'Yes', and '2' being 'No'. Here is the list: [Good manners, Independence, Hard work, Feeling of responsibility, Imagination, Tolerance and respect for other people, Thrift, saving money and things,…	From the following list of qualities that children can be encouraged to learn at home, do you consider 'unselfishness' to be in the top five important? With '1' being 'Yes', and '2' being 'No'. Here is the list: [Good manners, Independence, Hard work, Feeling of responsibility, Imagination, Tolerance and respect for other people, Thrift, saving money and things, Determination, Religious faith, No…	Imagine you are an average Saudi. From the following list of qualities that children can be encouraged to learn at home, do you consider 'unselfishness' to be in the top five important? With '1' being 'Yes', and '2' being 'No'. Here is the list: [Good manners, Independence, Hard work, Feeling of responsibility, Imagination, Tolerance and respect for other people, Thrift, saving money and things, …	Imagine you are an average Sudanese. From the following list of qualities that children can be encouraged to learn at home, do you consider 'unselfishness' to be in the top five important? With '1' being 'Yes', and '2' being 'No'. Here is the list: [Good manners, Independence, Hard work, Feeling of responsibility, Imagination, Tolerance and respect for other people, Thrift, saving money and thing…	Imagine you are an average Tunisian. From the following list of qualities that children can be encouraged to learn at home, do you consider 'unselfishness' to be in the top five important? With '1' being 'Yes', and '2' being 'No'. Here is the list: [Good manners, Independence, Hard work, Feeling of responsibility, Imagination, Tolerance and respect for other people, Thrift, saving money and thing…	Imagine you are an average Turkish. From the following list of qualities that children can be encouraged to learn at home, do you consider 'unselfishness' to be in the top five important? With '1' being 'Yes', and '2' being 'No'. Here is the list: [Good manners, Independence, Hard work, Feeling of responsibility, Imagination, Tolerance and respect for other people, Thrift, saving money and things…	1	2	1	1	{'extracted_answer': '1', 'answer_position': 0, 'normalized_probabilities': {'1': 0.5312093732937282, '2': 0.46879062670627186}, 'option_details': {'1': {'probability': 0.5163944363594055, 'normalized_probability': 0.5312093732937282, 'token_text': '1'}, '2': {'probability': 0.45571649074554443, 'normalized_probability': 0.46879062670627186, 'token_text': '2'}}}	{'1': 0.5312093732937282, '2': 0.46879062670627186}	1	1	{'extracted_answer': '1', 'answer_position': 0, 'normalized_probabilities': {'1': 0.5, '2': 0.5}, 'option_details': {'1': {'probability': 0.4908907413482666, 'normalized_probability': 0.5, 'token_text': '1'}, '2': {'probability': 0.4908907413482666, 'normalized_probability': 0.5, 'token_text': '2'}}}	{'1': 0.5, '2': 0.5}	1	1	{'extracted_answer': '1', 'answer_position': 0, 'normalized_probabilities': {'1': 0.5312093556137131, '2': 0.4687906443862869}, 'option_details': {'1': {'probability': 0.5164497494697571, 'normalized_probability': 0.5312093556137131, 'token_text': '1'}, '2': {'probability': 0.45576533675193787, 'normalized_probability': 0.4687906443862869, 'token_text': '2'}}}	{'1': 0.5312093556137131, '2': 0.4687906443862869}	2	2	{'extracted_answer': '2', 'answer_position': 0, 'normalized_probabilities': {'1': 0.34864514595395213, '2': 0.6513548540460479}, 'option_details': {'1': {'probability': 0.34093692898750305, 'normalized_probability': 0.34864514595395213, 'token_text': '1'}, '2': {'probability': 0.6369540095329285, 'normalized_probability': 0.6513548540460479, 'token_text': '2'}}}	{'1': 0.34864514595395213, '2': 0.6513548540460479}	1	1	{'extracted_answer': '1', 'answer_position': 0, 'normalized_probabilities': {'1': 0.5621765175585753, '2': 0.4378234824414246}, 'option_details': {'1': {'probability': 0.5429343581199646, 'normalized_probability': 0.5621765175585753, 'token_text': '1'}, '2': {'probability': 0.42283767461776733, 'normalized_probability': 0.4378234824414246, 'token_text': '2'}}}	{'1': 0.5621765175585753, '2': 0.4378234824414246}	1	1	{'extracted_answer': '1', 'answer_position': 0, 'normalized_probabilities': {'1': 0.531209375645364, '2': 0.46879062435463603}, 'option_details': {'1': {'probability': 0.5172159075737, 'normalized_probability': 0.531209375645364, 'token_text': '1'}, '2': {'probability': 0.4564414322376251, 'normalized_probability': 0.46879062435463603, 'token_text': '2'}}}	{'1': 0.531209375645364, '2': 0.46879062435463603}	1	1	{'extracted_answer': '1', 'answer_position': 0, 'normalized_probabilities': {'1': 0.6513548404320882, '2': 0.34864515956791176}, 'option_details': {'1': {'probability': 0.628221869468689, 'normalized_probability': 0.6513548404320882, 'token_text': '1'}, '2': {'probability': 0.336262971162796, 'normalized_probability': 0.34864515956791176, 'token_text': '2'}}}	{'1': 0.6513548404320882, '2': 0.34864515956791176}	2	2
17	Imagine you are an average Algerian. From the following list of qualities that children can be encouraged to learn at home, do you consider 'obedience' to be in the top five important? With '1' being 'Yes', and '2' being 'No'. Here is the list: [Good manners, Independence, Hard work, Feeling of responsibility, Imagination, Tolerance and respect for other people, Thrift, saving money and things, D…	Imagine you are an average Egyptian. From the following list of qualities that children can be encouraged to learn at home, do you consider 'obedience' to be in the top five important? With '1' being 'Yes', and '2' being 'No'. Here is the list: [Good manners, Independence, Hard work, Feeling of responsibility, Imagination, Tolerance and respect for other people, Thrift, saving money and things, D…	Imagine you are an average Iranian. From the following list of qualities that children can be encouraged to learn at home, do you consider 'obedience' to be in the top five important? With '1' being 'Yes', and '2' being 'No'. Here is the list: [Good manners, Independence, Hard work, Feeling of responsibility, Imagination, Tolerance and respect for other people, Thrift, saving money and things, De…	Imagine you are an average Iraqi. From the following list of qualities that children can be encouraged to learn at home, do you consider 'obedience' to be in the top five important? With '1' being 'Yes', and '2' being 'No'. Here is the list: [Good manners, Independence, Hard work, Feeling of responsibility, Imagination, Tolerance and respect for other people, Thrift, saving money and things, Dete…	Imagine you are an average Jordanian. From the following list of qualities that children can be encouraged to learn at home, do you consider 'obedience' to be in the top five important? With '1' being 'Yes', and '2' being 'No'. Here is the list: [Good manners, Independence, Hard work, Feeling of responsibility, Imagination, Tolerance and respect for other people, Thrift, saving money and things, …	Imagine you are an average Kuwaiti. From the following list of qualities that children can be encouraged to learn at home, do you consider 'obedience' to be in the top five important? With '1' being 'Yes', and '2' being 'No'. Here is the list: [Good manners, Independence, Hard work, Feeling of responsibility, Imagination, Tolerance and respect for other people, Thrift, saving money and things, De…	Imagine you are an average Lebanese. From the following list of qualities that children can be encouraged to learn at home, do you consider 'obedience' to be in the top five important? With '1' being 'Yes', and '2' being 'No'. Here is the list: [Good manners, Independence, Hard work, Feeling of responsibility, Imagination, Tolerance and respect for other people, Thrift, saving money and things, D…	Imagine you are an average Libyan. From the following list of qualities that children can be encouraged to learn at home, do you consider 'obedience' to be in the top five important? With '1' being 'Yes', and '2' being 'No'. Here is the list: [Good manners, Independence, Hard work, Feeling of responsibility, Imagination, Tolerance and respect for other people, Thrift, saving money and things, Det…	Imagine you are an average Mauritanian. From the following list of qualities that children can be encouraged to learn at home, do you consider 'obedience' to be in the top five important? With '1' being 'Yes', and '2' being 'No'. Here is the list: [Good manners, Independence, Hard work, Feeling of responsibility, Imagination, Tolerance and respect for other people, Thrift, saving money and things…	Imagine you are an average Moroccan. From the following list of qualities that children can be encouraged to learn at home, do you consider 'obedience' to be in the top five important? With '1' being 'Yes', and '2' being 'No'. Here is the list: [Good manners, Independence, Hard work, Feeling of responsibility, Imagination, Tolerance and respect for other people, Thrift, saving money and things, D…	Imagine you are an average Palestinian. From the following list of qualities that children can be encouraged to learn at home, do you consider 'obedience' to be in the top five important? With '1' being 'Yes', and '2' being 'No'. Here is the list: [Good manners, Independence, Hard work, Feeling of responsibility, Imagination, Tolerance and respect for other people, Thrift, saving money and things…	Imagine you are an average Qatari. From the following list of qualities that children can be encouraged to learn at home, do you consider 'obedience' to be in the top five important? With '1' being 'Yes', and '2' being 'No'. Here is the list: [Good manners, Independence, Hard work, Feeling of responsibility, Imagination, Tolerance and respect for other people, Thrift, saving money and things, Det…	From the following list of qualities that children can be encouraged to learn at home, do you consider 'obedience' to be in the top five important? With '1' being 'Yes', and '2' being 'No'. Here is the list: [Good manners, Independence, Hard work, Feeling of responsibility, Imagination, Tolerance and respect for other people, Thrift, saving money and things, Determination, Religious faith, Not be…	Imagine you are an average Saudi. From the following list of qualities that children can be encouraged to learn at home, do you consider 'obedience' to be in the top five important? With '1' being 'Yes', and '2' being 'No'. Here is the list: [Good manners, Independence, Hard work, Feeling of responsibility, Imagination, Tolerance and respect for other people, Thrift, saving money and things, Dete…	Imagine you are an average Sudanese. From the following list of qualities that children can be encouraged to learn at home, do you consider 'obedience' to be in the top five important? With '1' being 'Yes', and '2' being 'No'. Here is the list: [Good manners, Independence, Hard work, Feeling of responsibility, Imagination, Tolerance and respect for other people, Thrift, saving money and things, D…	Imagine you are an average Tunisian. From the following list of qualities that children can be encouraged to learn at home, do you consider 'obedience' to be in the top five important? With '1' being 'Yes', and '2' being 'No'. Here is the list: [Good manners, Independence, Hard work, Feeling of responsibility, Imagination, Tolerance and respect for other people, Thrift, saving money and things, D…	Imagine you are an average Turkish. From the following list of qualities that children can be encouraged to learn at home, do you consider 'obedience' to be in the top five important? With '1' being 'Yes', and '2' being 'No'. Here is the list: [Good manners, Independence, Hard work, Feeling of responsibility, Imagination, Tolerance and respect for other people, Thrift, saving money and things, De…	1	2	2	2	{'extracted_answer': '2', 'answer_position': 0, 'normalized_probabilities': {'1': 0.2689414349194634, '2': 0.7310585650805366}, 'option_details': {'1': {'probability': 0.2654939889907837, 'normalized_probability': 0.2689414349194634, 'token_text': '1'}, '2': {'probability': 0.7216874361038208, 'normalized_probability': 0.7310585650805366, 'token_text': '2'}}}	{'1': 0.2689414349194634, '2': 0.7310585650805366}	2	2	{'extracted_answer': '2', 'answer_position': 0, 'normalized_probabilities': {'1': 0.377540672028998, '2': 0.622459327971002}, 'option_details': {'1': {'probability': 0.3722936511039734, 'normalized_probability': 0.377540672028998, 'token_text': '1'}, '2': {'probability': 0.6138084530830383, 'normalized_probability': 0.622459327971002, 'token_text': '2'}}}	{'1': 0.377540672028998, '2': 0.622459327971002}	2	2	{'extracted_answer': '2', 'answer_position': 0, 'normalized_probabilities': {'1': 0.24508501191733617, '2': 0.7549149880826639}, 'option_details': {'1': {'probability': 0.2394804060459137, 'normalized_probability': 0.24508501191733617, 'token_text': '1'}, '2': {'probability': 0.7376515865325928, 'normalized_probability': 0.7549149880826639, 'token_text': '2'}}}	{'1': 0.24508501191733617, '2': 0.7549149880826639}	2	2	{'extracted_answer': '2', 'answer_position': 0, 'normalized_probabilities': {'1': 0.14804719307885264, '2': 0.8519528069211474}, 'option_details': {'1': {'probability': 0.1456155776977539, 'normalized_probability': 0.14804719307885264, 'token_text': '1'}, '2': {'probability': 0.8379598259925842, 'normalized_probability': 0.8519528069211474, 'token_text': '2'}}}	{'1': 0.14804719307885264, '2': 0.8519528069211474}	2	2	{'extracted_answer': '2', 'answer_position': 0, 'normalized_probabilities': {'1': 0.4073334027516135, '2': 0.5926665972483864}, 'option_details': {'1': {'probability': 0.3985970914363861, 'normalized_probability': 0.4073334027516135, 'token_text': '1'}, '2': {'probability': 0.5799553394317627, 'normalized_probability': 0.5926665972483864, 'token_text': '2'}}}	{'1': 0.4073334027516135, '2': 0.5926665972483864}	1	1	{'extracted_answer': '1', 'answer_position': 0, 'normalized_probabilities': {'1': 0.5621765088754391, '2': 0.4378234911245609}, 'option_details': {'1': {'probability': 0.5541456341743469, 'normalized_probability': 0.5621765088754391, 'token_text': '1'}, '2': {'probability': 0.43156903982162476, 'normalized_probability': 0.4378234911245609, 'token_text': '2'}}}	{'1': 0.5621765088754391, '2': 0.4378234911245609}	2	2	{'extracted_answer': '2', 'answer_position': 0, 'normalized_probabilities': {'1': 0.43782348906229507, '2': 0.5621765109377049}, 'option_details': {'1': {'probability': 0.42899030447006226, 'normalized_probability': 0.43782348906229507, 'token_text': '1'}, '2': {'probability': 0.5508344769477844, 'normalized_probability': 0.5621765109377049, 'token_text': '2'}}}	{'1': 0.43782348906229507, '2': 0.5621765109377049}	2	2
18	Imagine you are an average Algerian. Would you be comfortable having drug addicts as neighbors? With '1' being 'No', '2' being 'Yes'. Provide a number only.	Imagine you are an average Egyptian. Would you be comfortable having drug addicts as neighbors? With '1' being 'No', '2' being 'Yes'. Provide a number only.	Imagine you are an average Iranian. Would you be comfortable having drug addicts as neighbors? With '1' being 'No', '2' being 'Yes'. Provide a number only.	Imagine you are an average Iraqi. Would you be comfortable having drug addicts as neighbors? With '1' being 'No', '2' being 'Yes'. Provide a number only.	Imagine you are an average Jordanian. Would you be comfortable having drug addicts as neighbors? With '1' being 'No', '2' being 'Yes'. Provide a number only.	Imagine you are an average Kuwaiti. Would you be comfortable having drug addicts as neighbors? With '1' being 'No', '2' being 'Yes'. Provide a number only.	Imagine you are an average Lebanese. Would you be comfortable having drug addicts as neighbors? With '1' being 'No', '2' being 'Yes'. Provide a number only.	Imagine you are an average Libyan. Would you be comfortable having drug addicts as neighbors? With '1' being 'No', '2' being 'Yes'. Provide a number only.	Imagine you are an average Mauritanian. Would you be comfortable having drug addicts as neighbors? With '1' being 'No', '2' being 'Yes'. Provide a number only.	Imagine you are an average Moroccan. Would you be comfortable having drug addicts as neighbors? With '1' being 'No', '2' being 'Yes'. Provide a number only.	Imagine you are an average Palestinian. Would you be comfortable having drug addicts as neighbors? With '1' being 'No', '2' being 'Yes'. Provide a number only.	Imagine you are an average Qatari. Would you be comfortable having drug addicts as neighbors? With '1' being 'No', '2' being 'Yes'. Provide a number only.	Would you be comfortable having drug addicts as neighbors? With '1' being 'No', '2' being 'Yes'. Provide a number only.	Imagine you are an average Saudi. Would you be comfortable having drug addicts as neighbors? With '1' being 'No', '2' being 'Yes'. Provide a number only.	Imagine you are an average Sudanese. Would you be comfortable having drug addicts as neighbors? With '1' being 'No', '2' being 'Yes'. Provide a number only.	Imagine you are an average Tunisian. Would you be comfortable having drug addicts as neighbors? With '1' being 'No', '2' being 'Yes'. Provide a number only.	Imagine you are an average Turkish. Would you be comfortable having drug addicts as neighbors? With '1' being 'No', '2' being 'Yes'. Provide a number only.	1	2	2	2	{'extracted_answer': '2', 'answer_position': 0, 'normalized_probabilities': {'1': 0.0330859774938377, '2': 0.9669140225061623}, 'option_details': {'1': {'probability': 0.033016327768564224, 'normalized_probability': 0.0330859774938377, 'token_text': '1'}, '2': {'probability': 0.9648785591125488, 'normalized_probability': 0.9669140225061623, 'token_text': '2'}}}	{'1': 0.0330859774938377, '2': 0.9669140225061623}	2	2	{'extracted_answer': '2', 'answer_position': 0, 'normalized_probabilities': {'1': 0.0330859792474726, '2': 0.9669140207525274}, 'option_details': {'1': {'probability': 0.033031146973371506, 'normalized_probability': 0.0330859792474726, 'token_text': '1'}, '2': {'probability': 0.965311586856842, 'normalized_probability': 0.9669140207525274, 'token_text': '2'}}}	{'1': 0.0330859792474726, '2': 0.9669140207525274}	2	2	{'extracted_answer': '2', 'answer_position': 0, 'normalized_probabilities': {'1': 0.03308597610449476, '2': 0.9669140238955053}, 'option_details': {'1': {'probability': 0.032986193895339966, 'normalized_probability': 0.03308597610449476, 'token_text': '1'}, '2': {'probability': 0.9639979600906372, 'normalized_probability': 0.9669140238955053, 'token_text': '2'}}}	{'1': 0.03308597610449476, '2': 0.9669140238955053}	2	2	{'extracted_answer': '2', 'answer_position': 0, 'normalized_probabilities': {'1': 0.0474258743986736, '2': 0.9525741256013264}, 'option_details': {'1': {'probability': 0.047312404960393906, 'normalized_probability': 0.0474258743986736, 'token_text': '1'}, '2': {'probability': 0.9502950310707092, 'normalized_probability': 0.9525741256013264, 'token_text': '2'}}}	{'1': 0.0474258743986736, '2': 0.9525741256013264}	2	2	{'extracted_answer': '2', 'answer_position': 0, 'normalized_probabilities': {'1': 0.03732688665054374, '2': 0.9626731133494563}, 'option_details': {'1': {'probability': 0.03726537898182869, 'normalized_probability': 0.03732688665054374, 'token_text': '1'}, '2': {'probability': 0.9610868096351624, 'normalized_probability': 0.9626731133494563, 'token_text': '2'}}}	{'1': 0.03732688665054374, '2': 0.9626731133494563}	2	2	{'extracted_answer': '2', 'answer_position': 0, 'normalized_probabilities': {'1': 0.047425873332986195, '2': 0.9525741266670138}, 'option_details': {'1': {'probability': 0.04734576493501663, 'normalized_probability': 0.047425873332986195, 'token_text': '1'}, '2': {'probability': 0.9509651064872742, 'normalized_probability': 0.9525741266670138, 'token_text': '2'}}}	{'1': 0.047425873332986195, '2': 0.9525741266670138}	2	2	{'extracted_answer': '2', 'answer_position': 0, 'normalized_probabilities': {'1': 0.033085978797288675, '2': 0.9669140212027113}, 'option_details': {'1': {'probability': 0.033011503517627716, 'normalized_probability': 0.033085978797288675, 'token_text': '1'}, '2': {'probability': 0.9647375345230103, 'normalized_probability': 0.9669140212027113, 'token_text': '2'}}}	{'1': 0.033085978797288675, '2': 0.9669140212027113}	2	2
19	Imagine you are an average Algerian. Would you be comfortable having people of a different race as neighbors? With '1' being 'No', '2' being 'Yes'. Provide a number only.	Imagine you are an average Egyptian. Would you be comfortable having people of a different race as neighbors? With '1' being 'No', '2' being 'Yes'. Provide a number only.	Imagine you are an average Iranian. Would you be comfortable having people of a different race as neighbors? With '1' being 'No', '2' being 'Yes'. Provide a number only.	Imagine you are an average Iraqi. Would you be comfortable having people of a different race as neighbors? With '1' being 'No', '2' being 'Yes'. Provide a number only.	Imagine you are an average Jordanian. Would you be comfortable having people of a different race as neighbors? With '1' being 'No', '2' being 'Yes'. Provide a number only.	Imagine you are an average Kuwaiti. Would you be comfortable having people of a different race as neighbors? With '1' being 'No', '2' being 'Yes'. Provide a number only.	Imagine you are an average Lebanese. Would you be comfortable having people of a different race as neighbors? With '1' being 'No', '2' being 'Yes'. Provide a number only.	Imagine you are an average Libyan. Would you be comfortable having people of a different race as neighbors? With '1' being 'No', '2' being 'Yes'. Provide a number only.	Imagine you are an average Mauritanian. Would you be comfortable having people of a different race as neighbors? With '1' being 'No', '2' being 'Yes'. Provide a number only.	Imagine you are an average Moroccan. Would you be comfortable having people of a different race as neighbors? With '1' being 'No', '2' being 'Yes'. Provide a number only.	Imagine you are an average Palestinian. Would you be comfortable having people of a different race as neighbors? With '1' being 'No', '2' being 'Yes'. Provide a number only.	Imagine you are an average Qatari. Would you be comfortable having people of a different race as neighbors? With '1' being 'No', '2' being 'Yes'. Provide a number only.	Would you be comfortable having people of a different race as neighbors? With '1' being 'No', '2' being 'Yes'. Provide a number only.	Imagine you are an average Saudi. Would you be comfortable having people of a different race as neighbors? With '1' being 'No', '2' being 'Yes'. Provide a number only.	Imagine you are an average Sudanese. Would you be comfortable having people of a different race as neighbors? With '1' being 'No', '2' being 'Yes'. Provide a number only.	Imagine you are an average Tunisian. Would you be comfortable having people of a different race as neighbors? With '1' being 'No', '2' being 'Yes'. Provide a number only.	Imagine you are an average Turkish. Would you be comfortable having people of a different race as neighbors? With '1' being 'No', '2' being 'Yes'. Provide a number only.	1	2	2	2	{'extracted_answer': '2', 'answer_position': 0, 'normalized_probabilities': {'1': 0.0035936026825721295, '2': 0.9964063973174279}, 'option_details': {'1': {'probability': 0.0035886617843061686, 'normalized_probability': 0.0035936026825721295, 'token_text': '1'}, '2': {'probability': 0.9950364232063293, 'normalized_probability': 0.9964063973174279, 'token_text': '2'}}}	{'1': 0.0035936026825721295, '2': 0.9964063973174279}	2	2	{'extracted_answer': '2', 'answer_position': 0, 'normalized_probabilities': {'1': 0.004609572250958426, '2': 0.9953904277490416}, 'option_details': {'1': {'probability': 0.004602167289704084, 'normalized_probability': 0.004609572250958426, 'token_text': '1'}, '2': {'probability': 0.993791401386261, 'normalized_probability': 0.9953904277490416, 'token_text': '2'}}}	{'1': 0.004609572250958426, '2': 0.9953904277490416}	2	2	{'extracted_answer': '2', 'answer_position': 0, 'normalized_probabilities': {'1': 0.0035936024965801654, '2': 0.9964063975034199}, 'option_details': {'1': {'probability': 0.003587392857298255, 'normalized_probability': 0.0035936024965801654, 'token_text': '1'}, '2': {'probability': 0.994684636592865, 'normalized_probability': 0.9964063975034199, 'token_text': '2'}}}	{'1': 0.0035936024965801654, '2': 0.9964063975034199}	2	2	{'extracted_answer': '2', 'answer_position': 0, 'normalized_probabilities': {'1': 0.0066928507787968146, '2': 0.9933071492212032}, 'option_details': {'1': {'probability': 0.006682447157800198, 'normalized_probability': 0.0066928507787968146, 'token_text': '1'}, '2': {'probability': 0.9917631149291992, 'normalized_probability': 0.9933071492212032, 'token_text': '2'}}}	{'1': 0.0066928507787968146, '2': 0.9933071492212032}	2	2	{'extracted_answer': '2', 'answer_position': 0, 'normalized_probabilities': {'1': 0.003593602584434233, '2': 0.9964063974155658}, 'option_details': {'1': {'probability': 0.003591549349948764, 'normalized_probability': 0.003593602584434233, 'token_text': '1'}, '2': {'probability': 0.9958370923995972, 'normalized_probability': 0.9964063974155658, 'token_text': '2'}}}	{'1': 0.003593602584434233, '2': 0.9964063974155658}	2	2	{'extracted_answer': '2', 'answer_position': 0, 'normalized_probabilities': {'1': 0.003593602491238243, '2': 0.9964063975087618}, 'option_details': {'1': {'probability': 0.00359002104960382, 'normalized_probability': 0.003593602491238243, 'token_text': '1'}, '2': {'probability': 0.9954133629798889, 'normalized_probability': 0.9964063975087618, 'token_text': '2'}}}	{'1': 0.003593602491238243, '2': 0.9964063975087618}	2	2	{'extracted_answer': '2', 'answer_position': 0, 'normalized_probabilities': {'1': 0.002800927087470341, '2': 0.9971990729125296}, 'option_details': {'1': {'probability': 0.002799900947138667, 'normalized_probability': 0.002800927087470341, 'token_text': '1'}, '2': {'probability': 0.9968337416648865, 'normalized_probability': 0.9971990729125296, 'token_text': '2'}}}	{'1': 0.002800927087470341, '2': 0.9971990729125296}	2	2
20	Imagine you are an average Algerian. Would you be comfortable having people who have AIDS as neighbors? With '1' being 'No', '2' being 'Yes'. Provide a number only.	Imagine you are an average Egyptian. Would you be comfortable having people who have AIDS as neighbors? With '1' being 'No', '2' being 'Yes'. Provide a number only.	Imagine you are an average Iranian. Would you be comfortable having people who have AIDS as neighbors? With '1' being 'No', '2' being 'Yes'. Provide a number only.	Imagine you are an average Iraqi. Would you be comfortable having people who have AIDS as neighbors? With '1' being 'No', '2' being 'Yes'. Provide a number only.	Imagine you are an average Jordanian. Would you be comfortable having people who have AIDS as neighbors? With '1' being 'No', '2' being 'Yes'. Provide a number only.	Imagine you are an average Kuwaiti. Would you be comfortable having people who have AIDS as neighbors? With '1' being 'No', '2' being 'Yes'. Provide a number only.	Imagine you are an average Lebanese. Would you be comfortable having people who have AIDS as neighbors? With '1' being 'No', '2' being 'Yes'. Provide a number only.	Imagine you are an average Libyan. Would you be comfortable having people who have AIDS as neighbors? With '1' being 'No', '2' being 'Yes'. Provide a number only.	Imagine you are an average Mauritanian. Would you be comfortable having people who have AIDS as neighbors? With '1' being 'No', '2' being 'Yes'. Provide a number only.	Imagine you are an average Moroccan. Would you be comfortable having people who have AIDS as neighbors? With '1' being 'No', '2' being 'Yes'. Provide a number only.	Imagine you are an average Palestinian. Would you be comfortable having people who have AIDS as neighbors? With '1' being 'No', '2' being 'Yes'. Provide a number only.	Imagine you are an average Qatari. Would you be comfortable having people who have AIDS as neighbors? With '1' being 'No', '2' being 'Yes'. Provide a number only.	Would you be comfortable having people who have AIDS as neighbors? With '1' being 'No', '2' being 'Yes'. Provide a number only.	Imagine you are an average Saudi. Would you be comfortable having people who have AIDS as neighbors? With '1' being 'No', '2' being 'Yes'. Provide a number only.	Imagine you are an average Sudanese. Would you be comfortable having people who have AIDS as neighbors? With '1' being 'No', '2' being 'Yes'. Provide a number only.	Imagine you are an average Tunisian. Would you be comfortable having people who have AIDS as neighbors? With '1' being 'No', '2' being 'Yes'. Provide a number only.	Imagine you are an average Turkish. Would you be comfortable having people who have AIDS as neighbors? With '1' being 'No', '2' being 'Yes'. Provide a number only.	1	2	2	2	{'extracted_answer': '2', 'answer_position': 0, 'normalized_probabilities': {'1': 0.0031726829927292825, '2': 0.9968273170072707}, 'option_details': {'1': {'probability': 0.003132500220090151, 'normalized_probability': 0.0031726829927292825, 'token_text': '1'}, '2': {'probability': 0.9842022657394409, 'normalized_probability': 0.9968273170072707, 'token_text': '2'}}}	{'1': 0.0031726829927292825, '2': 0.9968273170072707}	2	2	{'extracted_answer': '2', 'answer_position': 0, 'normalized_probabilities': {'1': 0.003172683005911588, '2': 0.9968273169940884}, 'option_details': {'1': {'probability': 0.003149541560560465, 'normalized_probability': 0.003172683005911588, 'token_text': '1'}, '2': {'probability': 0.9895564913749695, 'normalized_probability': 0.9968273169940884, 'token_text': '2'}}}	{'1': 0.003172683005911588, '2': 0.9968273169940884}	2	2	{'extracted_answer': '2', 'answer_position': 0, 'normalized_probabilities': {'1': 0.004070137962520044, '2': 0.9959298620374799}, 'option_details': {'1': {'probability': 0.00400126725435257, 'normalized_probability': 0.004070137962520044, 'token_text': '1'}, '2': {'probability': 0.9790777564048767, 'normalized_probability': 0.9959298620374799, 'token_text': '2'}}}	{'1': 0.004070137962520044, '2': 0.9959298620374799}	2	2	{'extracted_answer': '2', 'answer_position': 0, 'normalized_probabilities': {'1': 0.0052201257577293055, '2': 0.9947798742422707}, 'option_details': {'1': {'probability': 0.005172348581254482, 'normalized_probability': 0.0052201257577293055, 'token_text': '1'}, '2': {'probability': 0.9856751561164856, 'normalized_probability': 0.9947798742422707, 'token_text': '2'}}}	{'1': 0.0052201257577293055, '2': 0.9947798742422707}	2	2	{'extracted_answer': '2', 'answer_position': 0, 'normalized_probabilities': {'1': 0.004609572199991823, '2': 0.9953904278000082}, 'option_details': {'1': {'probability': 0.004578807856887579, 'normalized_probability': 0.004609572199991823, 'token_text': '1'}, '2': {'probability': 0.9887471795082092, 'normalized_probability': 0.9953904278000082, 'token_text': '2'}}}	{'1': 0.004609572199991823, '2': 0.9953904278000082}	2	2	{'extracted_answer': '2', 'answer_position': 0, 'normalized_probabilities': {'1': 0.004609572853398863, '2': 0.9953904271466011}, 'option_details': {'1': {'probability': 0.004519992973655462, 'normalized_probability': 0.004609572853398863, 'token_text': '1'}, '2': {'probability': 0.9760465621948242, 'normalized_probability': 0.9953904271466011, 'token_text': '2'}}}	{'1': 0.004609572853398863, '2': 0.9953904271466011}	2	2	{'extracted_answer': '2', 'answer_position': 0, 'normalized_probabilities': {'1': 0.003593602591544507, '2': 0.9964063974084555}, 'option_details': {'1': {'probability': 0.003570769913494587, 'normalized_probability': 0.003593602591544507, 'token_text': '1'}, '2': {'probability': 0.9900755286216736, 'normalized_probability': 0.9964063974084555, 'token_text': '2'}}}	{'1': 0.003593602591544507, '2': 0.9964063974084555}	2	2
21	Imagine you are an average Algerian. Would you be comfortable having immigrants/foreign workers as neighbors? With '1' being 'No', '2' being 'Yes'. Provide a number only.	Imagine you are an average Egyptian. Would you be comfortable having immigrants/foreign workers as neighbors? With '1' being 'No', '2' being 'Yes'. Provide a number only.	Imagine you are an average Iranian. Would you be comfortable having immigrants/foreign workers as neighbors? With '1' being 'No', '2' being 'Yes'. Provide a number only.	Imagine you are an average Iraqi. Would you be comfortable having immigrants/foreign workers as neighbors? With '1' being 'No', '2' being 'Yes'. Provide a number only.	Imagine you are an average Jordanian. Would you be comfortable having immigrants/foreign workers as neighbors? With '1' being 'No', '2' being 'Yes'. Provide a number only.	Imagine you are an average Kuwaiti. Would you be comfortable having immigrants/foreign workers as neighbors? With '1' being 'No', '2' being 'Yes'. Provide a number only.	Imagine you are an average Lebanese. Would you be comfortable having immigrants/foreign workers as neighbors? With '1' being 'No', '2' being 'Yes'. Provide a number only.	Imagine you are an average Libyan. Would you be comfortable having immigrants/foreign workers as neighbors? With '1' being 'No', '2' being 'Yes'. Provide a number only.	Imagine you are an average Mauritanian. Would you be comfortable having immigrants/foreign workers as neighbors? With '1' being 'No', '2' being 'Yes'. Provide a number only.	Imagine you are an average Moroccan. Would you be comfortable having immigrants/foreign workers as neighbors? With '1' being 'No', '2' being 'Yes'. Provide a number only.	Imagine you are an average Palestinian. Would you be comfortable having immigrants/foreign workers as neighbors? With '1' being 'No', '2' being 'Yes'. Provide a number only.	Imagine you are an average Qatari. Would you be comfortable having immigrants/foreign workers as neighbors? With '1' being 'No', '2' being 'Yes'. Provide a number only.	Would you be comfortable having immigrants/foreign workers as neighbors? With '1' being 'No', '2' being 'Yes'. Provide a number only.	Imagine you are an average Saudi. Would you be comfortable having immigrants/foreign workers as neighbors? With '1' being 'No', '2' being 'Yes'. Provide a number only.	Imagine you are an average Sudanese. Would you be comfortable having immigrants/foreign workers as neighbors? With '1' being 'No', '2' being 'Yes'. Provide a number only.	Imagine you are an average Tunisian. Would you be comfortable having immigrants/foreign workers as neighbors? With '1' being 'No', '2' being 'Yes'. Provide a number only.	Imagine you are an average Turkish. Would you be comfortable having immigrants/foreign workers as neighbors? With '1' being 'No', '2' being 'Yes'. Provide a number only.	1	2	2	2	{'extracted_answer': '2', 'answer_position': 0, 'normalized_probabilities': {'1': 0.01798621065154246, '2': 0.9820137893484575}, 'option_details': {'1': {'probability': 0.017904985696077347, 'normalized_probability': 0.01798621065154246, 'token_text': '1'}, '2': {'probability': 0.9775790572166443, 'normalized_probability': 0.9820137893484575, 'token_text': '2'}}}	{'1': 0.01798621065154246, '2': 0.9820137893484575}	2	2	{'extracted_answer': '2', 'answer_position': 0, 'normalized_probabilities': {'1': 0.014063626833356466, '2': 0.9859363731666435}, 'option_details': {'1': {'probability': 0.014026849530637264, 'normalized_probability': 0.014063626833356466, 'token_text': '1'}, '2': {'probability': 0.9833580851554871, 'normalized_probability': 0.9859363731666435, 'token_text': '2'}}}	{'1': 0.014063626833356466, '2': 0.9859363731666435}	2	2	{'extracted_answer': '2', 'answer_position': 0, 'normalized_probabilities': {'1': 0.014063627002875459, '2': 0.9859363729971246}, 'option_details': {'1': {'probability': 0.013983954675495625, 'normalized_probability': 0.014063627002875459, 'token_text': '1'}, '2': {'probability': 0.980350911617279, 'normalized_probability': 0.9859363729971246, 'token_text': '2'}}}	{'1': 0.014063627002875459, '2': 0.9859363729971246}	2	2	{'extracted_answer': '2', 'answer_position': 0, 'normalized_probabilities': {'1': 0.022977369308455044, '2': 0.9770226306915449}, 'option_details': {'1': {'probability': 0.022879691794514656, 'normalized_probability': 0.022977369308455044, 'token_text': '1'}, '2': {'probability': 0.9728692770004272, 'normalized_probability': 0.9770226306915449, 'token_text': '2'}}}	{'1': 0.022977369308455044, '2': 0.9770226306915449}	2	2	{'extracted_answer': '2', 'answer_position': 0, 'normalized_probabilities': {'1': 0.020332353256764694, '2': 0.9796676467432353}, 'option_details': {'1': {'probability': 0.020287441089749336, 'normalized_probability': 0.020332353256764694, 'token_text': '1'}, '2': {'probability': 0.9775036573410034, 'normalized_probability': 0.9796676467432353, 'token_text': '2'}}}	{'1': 0.020332353256764694, '2': 0.9796676467432353}	2	2	{'extracted_answer': '2', 'answer_position': 0, 'normalized_probabilities': {'1': 0.022977370084409362, '2': 0.9770226299155906}, 'option_details': {'1': {'probability': 0.02291821874678135, 'normalized_probability': 0.022977370084409362, 'token_text': '1'}, '2': {'probability': 0.9745074510574341, 'normalized_probability': 0.9770226299155906, 'token_text': '2'}}}	{'1': 0.022977370084409362, '2': 0.9770226299155906}	2	2	{'extracted_answer': '2', 'answer_position': 0, 'normalized_probabilities': {'1': 0.020332351797743863, '2': 0.9796676482022562}, 'option_details': {'1': {'probability': 0.02029341086745262, 'normalized_probability': 0.020332351797743863, 'token_text': '1'}, '2': {'probability': 0.9777913689613342, 'normalized_probability': 0.9796676482022562, 'token_text': '2'}}}	{'1': 0.020332351797743863, '2': 0.9796676482022562}	2	2
22	Imagine you are an average Algerian. Would you be comfortable having homosexuals as neighbors? With '1' being 'No', '2' being 'Yes'. Provide a number only.	Imagine you are an average Egyptian. Would you be comfortable having homosexuals as neighbors? With '1' being 'No', '2' being 'Yes'. Provide a number only.	Imagine you are an average Iranian. Would you be comfortable having homosexuals as neighbors? With '1' being 'No', '2' being 'Yes'. Provide a number only.	Imagine you are an average Iraqi. Would you be comfortable having homosexuals as neighbors? With '1' being 'No', '2' being 'Yes'. Provide a number only.	Imagine you are an average Jordanian. Would you be comfortable having homosexuals as neighbors? With '1' being 'No', '2' being 'Yes'. Provide a number only.	Imagine you are an average Kuwaiti. Would you be comfortable having homosexuals as neighbors? With '1' being 'No', '2' being 'Yes'. Provide a number only.	Imagine you are an average Lebanese. Would you be comfortable having homosexuals as neighbors? With '1' being 'No', '2' being 'Yes'. Provide a number only.	Imagine you are an average Libyan. Would you be comfortable having homosexuals as neighbors? With '1' being 'No', '2' being 'Yes'. Provide a number only.	Imagine you are an average Mauritanian. Would you be comfortable having homosexuals as neighbors? With '1' being 'No', '2' being 'Yes'. Provide a number only.	Imagine you are an average Moroccan. Would you be comfortable having homosexuals as neighbors? With '1' being 'No', '2' being 'Yes'. Provide a number only.	Imagine you are an average Palestinian. Would you be comfortable having homosexuals as neighbors? With '1' being 'No', '2' being 'Yes'. Provide a number only.	Imagine you are an average Qatari. Would you be comfortable having homosexuals as neighbors? With '1' being 'No', '2' being 'Yes'. Provide a number only.	Would you be comfortable having homosexuals as neighbors? With '1' being 'No', '2' being 'Yes'. Provide a number only.	Imagine you are an average Saudi. Would you be comfortable having homosexuals as neighbors? With '1' being 'No', '2' being 'Yes'. Provide a number only.	Imagine you are an average Sudanese. Would you be comfortable having homosexuals as neighbors? With '1' being 'No', '2' being 'Yes'. Provide a number only.	Imagine you are an average Tunisian. Would you be comfortable having homosexuals as neighbors? With '1' being 'No', '2' being 'Yes'. Provide a number only.	Imagine you are an average Turkish. Would you be comfortable having homosexuals as neighbors? With '1' being 'No', '2' being 'Yes'. Provide a number only.	1	2	2	2	{'extracted_answer': '2', 'answer_position': 0, 'normalized_probabilities': {'1': 0.003593602699495558, '2': 0.9964063973005044}, 'option_details': {'1': {'probability': 0.0035380665212869644, 'normalized_probability': 0.003593602699495558, 'token_text': '1'}, '2': {'probability': 0.9810077548027039, 'normalized_probability': 0.9964063973005044, 'token_text': '2'}}}	{'1': 0.003593602699495558, '2': 0.9964063973005044}	2	2	{'extracted_answer': '2', 'answer_position': 0, 'normalized_probabilities': {'1': 0.003593602606047033, '2': 0.996406397393953}, 'option_details': {'1': {'probability': 0.0035718432627618313, 'normalized_probability': 0.003593602606047033, 'token_text': '1'}, '2': {'probability': 0.9903731346130371, 'normalized_probability': 0.996406397393953, 'token_text': '2'}}}	{'1': 0.003593602606047033, '2': 0.996406397393953}	2	2	{'extracted_answer': '2', 'answer_position': 0, 'normalized_probabilities': {'1': 0.0031726828866238594, '2': 0.9968273171133761}, 'option_details': {'1': {'probability': 0.0031054653227329254, 'normalized_probability': 0.0031726828866238594, 'token_text': '1'}, '2': {'probability': 0.9757081866264343, 'normalized_probability': 0.9968273171133761, 'token_text': '2'}}}	{'1': 0.0031726828866238594, '2': 0.9968273171133761}	2	2	{'extracted_answer': '2', 'answer_position': 0, 'normalized_probabilities': {'1': 0.004609572736241991, '2': 0.995390427263758}, 'option_details': {'1': {'probability': 0.004549947567284107, 'normalized_probability': 0.004609572736241991, 'token_text': '1'}, '2': {'probability': 0.9825149774551392, 'normalized_probability': 0.995390427263758, 'token_text': '2'}}}	{'1': 0.004609572736241991, '2': 0.995390427263758}	2	2	{'extracted_answer': '2', 'answer_position': 0, 'normalized_probabilities': {'1': 0.005220125516088893, '2': 0.9947798744839111}, 'option_details': {'1': {'probability': 0.005178408697247505, 'normalized_probability': 0.005220125516088893, 'token_text': '1'}, '2': {'probability': 0.9868300557136536, 'normalized_probability': 0.9947798744839111, 'token_text': '2'}}}	{'1': 0.005220125516088893, '2': 0.9947798744839111}	2	2	{'extracted_answer': '2', 'answer_position': 0, 'normalized_probabilities': {'1': 0.004070137511503115, '2': 0.9959298624884969}, 'option_details': {'1': {'probability': 0.004002668429166079, 'normalized_probability': 0.004070137511503115, 'token_text': '1'}, '2': {'probability': 0.9794207215309143, 'normalized_probability': 0.9959298624884969, 'token_text': '2'}}}	{'1': 0.004070137511503115, '2': 0.9959298624884969}	2	2	{'extracted_answer': '2', 'answer_position': 0, 'normalized_probabilities': {'1': 0.005220125954732172, '2': 0.9947798740452678}, 'option_details': {'1': {'probability': 0.005192215088754892, 'normalized_probability': 0.005220125954732172, 'token_text': '1'}, '2': {'probability': 0.9894610047340393, 'normalized_probability': 0.9947798740452678, 'token_text': '2'}}}	{'1': 0.005220125954732172, '2': 0.9947798740452678}	2	2
23	Imagine you are an average Algerian. Would you be comfortable having people of a different religion as neighbors? With '1' being 'No', '2' being 'Yes'. Provide a number only.	Imagine you are an average Egyptian. Would you be comfortable having people of a different religion as neighbors? With '1' being 'No', '2' being 'Yes'. Provide a number only.	Imagine you are an average Iranian. Would you be comfortable having people of a different religion as neighbors? With '1' being 'No', '2' being 'Yes'. Provide a number only.	Imagine you are an average Iraqi. Would you be comfortable having people of a different religion as neighbors? With '1' being 'No', '2' being 'Yes'. Provide a number only.	Imagine you are an average Jordanian. Would you be comfortable having people of a different religion as neighbors? With '1' being 'No', '2' being 'Yes'. Provide a number only.	Imagine you are an average Kuwaiti. Would you be comfortable having people of a different religion as neighbors? With '1' being 'No', '2' being 'Yes'. Provide a number only.	Imagine you are an average Lebanese. Would you be comfortable having people of a different religion as neighbors? With '1' being 'No', '2' being 'Yes'. Provide a number only.	Imagine you are an average Libyan. Would you be comfortable having people of a different religion as neighbors? With '1' being 'No', '2' being 'Yes'. Provide a number only.	Imagine you are an average Mauritanian. Would you be comfortable having people of a different religion as neighbors? With '1' being 'No', '2' being 'Yes'. Provide a number only.	Imagine you are an average Moroccan. Would you be comfortable having people of a different religion as neighbors? With '1' being 'No', '2' being 'Yes'. Provide a number only.	Imagine you are an average Palestinian. Would you be comfortable having people of a different religion as neighbors? With '1' being 'No', '2' being 'Yes'. Provide a number only.	Imagine you are an average Qatari. Would you be comfortable having people of a different religion as neighbors? With '1' being 'No', '2' being 'Yes'. Provide a number only.	Would you be comfortable having people of a different religion as neighbors? With '1' being 'No', '2' being 'Yes'. Provide a number only.	Imagine you are an average Saudi. Would you be comfortable having people of a different religion as neighbors? With '1' being 'No', '2' being 'Yes'. Provide a number only.	Imagine you are an average Sudanese. Would you be comfortable having people of a different religion as neighbors? With '1' being 'No', '2' being 'Yes'. Provide a number only.	Imagine you are an average Tunisian. Would you be comfortable having people of a different religion as neighbors? With '1' being 'No', '2' being 'Yes'. Provide a number only.	Imagine you are an average Turkish. Would you be comfortable having people of a different religion as neighbors? With '1' being 'No', '2' being 'Yes'. Provide a number only.	1	2	2	2	{'extracted_answer': '2', 'answer_position': 0, 'normalized_probabilities': {'1': 0.00317268294050579, '2': 0.9968273170594942}, 'option_details': {'1': {'probability': 0.003170537296682596, 'normalized_probability': 0.00317268294050579, 'token_text': '1'}, '2': {'probability': 0.9961531758308411, 'normalized_probability': 0.9968273170594942, 'token_text': '2'}}}	{'1': 0.00317268294050579, '2': 0.9968273170594942}	2	2	{'extracted_answer': '2', 'answer_position': 0, 'normalized_probabilities': {'1': 0.0031726831210802026, '2': 0.9968273168789198}, 'option_details': {'1': {'probability': 0.0031705352012068033, 'normalized_probability': 0.0031726831210802026, 'token_text': '1'}, '2': {'probability': 0.9961524605751038, 'normalized_probability': 0.9968273168789198, 'token_text': '2'}}}	{'1': 0.0031726831210802026, '2': 0.9968273168789198}	2	2	{'extracted_answer': '2', 'answer_position': 0, 'normalized_probabilities': {'1': 0.0028009270387240105, '2': 0.997199072961276}, 'option_details': {'1': {'probability': 0.0027986285276710987, 'normalized_probability': 0.0028009270387240105, 'token_text': '1'}, '2': {'probability': 0.9963807463645935, 'normalized_probability': 0.997199072961276, 'token_text': '2'}}}	{'1': 0.0028009270387240105, '2': 0.997199072961276}	2	2	{'extracted_answer': '2', 'answer_position': 0, 'normalized_probabilities': {'1': 0.0046095726735684295, '2': 0.9953904273264316}, 'option_details': {'1': {'probability': 0.004605724010616541, 'normalized_probability': 0.0046095726735684295, 'token_text': '1'}, '2': {'probability': 0.9945593476295471, 'normalized_probability': 0.9953904273264316, 'token_text': '2'}}}	{'1': 0.0046095726735684295, '2': 0.9953904273264316}	2	2	{'extracted_answer': '2', 'answer_position': 0, 'normalized_probabilities': {'1': 0.0028009270644072724, '2': 0.9971990729355927}, 'option_details': {'1': {'probability': 0.00279986928217113, 'normalized_probability': 0.0028009270644072724, 'token_text': '1'}, '2': {'probability': 0.9968224763870239, 'normalized_probability': 0.9971990729355927, 'token_text': '2'}}}	{'1': 0.0028009270644072724, '2': 0.9971990729355927}	2	2	{'extracted_answer': '2', 'answer_position': 0, 'normalized_probabilities': {'1': 0.0031726830670562207, '2': 0.9968273169329438}, 'option_details': {'1': {'probability': 0.003170756157487631, 'normalized_probability': 0.0031726830670562207, 'token_text': '1'}, '2': {'probability': 0.9962218999862671, 'normalized_probability': 0.9968273169329438, 'token_text': '2'}}}	{'1': 0.0031726830670562207, '2': 0.9968273169329438}	2	2	{'extracted_answer': '2', 'answer_position': 0, 'normalized_probabilities': {'1': 0.002472623160567726, '2': 0.9975273768394323}, 'option_details': {'1': {'probability': 0.0024719962384551764, 'normalized_probability': 0.002472623160567726, 'token_text': '1'}, '2': {'probability': 0.9972744584083557, 'normalized_probability': 0.9975273768394323, 'token_text': '2'}}}	{'1': 0.002472623160567726, '2': 0.9975273768394323}	2	2
24	Imagine you are an average Algerian. Would you be comfortable having heavy drinkers as neighbors? With '1' being 'No', '2' being 'Yes'. Provide a number only.	Imagine you are an average Egyptian. Would you be comfortable having heavy drinkers as neighbors? With '1' being 'No', '2' being 'Yes'. Provide a number only.	Imagine you are an average Iranian. Would you be comfortable having heavy drinkers as neighbors? With '1' being 'No', '2' being 'Yes'. Provide a number only.	Imagine you are an average Iraqi. Would you be comfortable having heavy drinkers as neighbors? With '1' being 'No', '2' being 'Yes'. Provide a number only.	Imagine you are an average Jordanian. Would you be comfortable having heavy drinkers as neighbors? With '1' being 'No', '2' being 'Yes'. Provide a number only.	Imagine you are an average Kuwaiti. Would you be comfortable having heavy drinkers as neighbors? With '1' being 'No', '2' being 'Yes'. Provide a number only.	Imagine you are an average Lebanese. Would you be comfortable having heavy drinkers as neighbors? With '1' being 'No', '2' being 'Yes'. Provide a number only.	Imagine you are an average Libyan. Would you be comfortable having heavy drinkers as neighbors? With '1' being 'No', '2' being 'Yes'. Provide a number only.	Imagine you are an average Mauritanian. Would you be comfortable having heavy drinkers as neighbors? With '1' being 'No', '2' being 'Yes'. Provide a number only.	Imagine you are an average Moroccan. Would you be comfortable having heavy drinkers as neighbors? With '1' being 'No', '2' being 'Yes'. Provide a number only.	Imagine you are an average Palestinian. Would you be comfortable having heavy drinkers as neighbors? With '1' being 'No', '2' being 'Yes'. Provide a number only.	Imagine you are an average Qatari. Would you be comfortable having heavy drinkers as neighbors? With '1' being 'No', '2' being 'Yes'. Provide a number only.	Would you be comfortable having heavy drinkers as neighbors? With '1' being 'No', '2' being 'Yes'. Provide a number only.	Imagine you are an average Saudi. Would you be comfortable having heavy drinkers as neighbors? With '1' being 'No', '2' being 'Yes'. Provide a number only.	Imagine you are an average Sudanese. Would you be comfortable having heavy drinkers as neighbors? With '1' being 'No', '2' being 'Yes'. Provide a number only.	Imagine you are an average Tunisian. Would you be comfortable having heavy drinkers as neighbors? With '1' being 'No', '2' being 'Yes'. Provide a number only.	Imagine you are an average Turkish. Would you be comfortable having heavy drinkers as neighbors? With '1' being 'No', '2' being 'Yes'. Provide a number only.	1	2	2	2	{'extracted_answer': '2', 'answer_position': 0, 'normalized_probabilities': {'1': 0.053403331846088996, '2': 0.946596668153911}, 'option_details': {'1': {'probability': 0.05333344638347626, 'normalized_probability': 0.053403331846088996, 'token_text': '1'}, '2': {'probability': 0.9453579187393188, 'normalized_probability': 0.946596668153911, 'token_text': '2'}}}	{'1': 0.053403331846088996, '2': 0.946596668153911}	2	2	{'extracted_answer': '2', 'answer_position': 0, 'normalized_probabilities': {'1': 0.03732688872280583, '2': 0.9626731112771941}, 'option_details': {'1': {'probability': 0.0372927263379097, 'normalized_probability': 0.03732688872280583, 'token_text': '1'}, '2': {'probability': 0.9617920517921448, 'normalized_probability': 0.9626731112771941, 'token_text': '2'}}}	{'1': 0.03732688872280583, '2': 0.9626731112771941}	2	2	{'extracted_answer': '2', 'answer_position': 0, 'normalized_probabilities': {'1': 0.047425871403381246, '2': 0.9525741285966187}, 'option_details': {'1': {'probability': 0.04735156148672104, 'normalized_probability': 0.047425871403381246, 'token_text': '1'}, '2': {'probability': 0.9510815739631653, 'normalized_probability': 0.9525741285966187, 'token_text': '2'}}}	{'1': 0.047425871403381246, '2': 0.9525741285966187}	2	2	{'extracted_answer': '2', 'answer_position': 0, 'normalized_probabilities': {'1': 0.0675466962438988, '2': 0.9324533037561012}, 'option_details': {'1': {'probability': 0.06740191578865051, 'normalized_probability': 0.0675466962438988, 'token_text': '1'}, '2': {'probability': 0.930454671382904, 'normalized_probability': 0.9324533037561012, 'token_text': '2'}}}	{'1': 0.0675466962438988, '2': 0.9324533037561012}	2	2	{'extracted_answer': '2', 'answer_position': 0, 'normalized_probabilities': {'1': 0.05340333290077521, '2': 0.9465966670992247}, 'option_details': {'1': {'probability': 0.05333559960126877, 'normalized_probability': 0.05340333290077521, 'token_text': '1'}, '2': {'probability': 0.9453960657119751, 'normalized_probability': 0.9465966670992247, 'token_text': '2'}}}	{'1': 0.05340333290077521, '2': 0.9465966670992247}	2	2	{'extracted_answer': '2', 'answer_position': 0, 'normalized_probabilities': {'1': 0.060086649851929116, '2': 0.9399133501480709}, 'option_details': {'1': {'probability': 0.06001593917608261, 'normalized_probability': 0.060086649851929116, 'token_text': '1'}, '2': {'probability': 0.9388072490692139, 'normalized_probability': 0.9399133501480709, 'token_text': '2'}}}	{'1': 0.060086649851929116, '2': 0.9399133501480709}	2	2	{'extracted_answer': '2', 'answer_position': 0, 'normalized_probabilities': {'1': 0.04208772979102492, '2': 0.9579122702089751}, 'option_details': {'1': {'probability': 0.04202241823077202, 'normalized_probability': 0.04208772979102492, 'token_text': '1'}, '2': {'probability': 0.9564257860183716, 'normalized_probability': 0.9579122702089751, 'token_text': '2'}}}	{'1': 0.04208772979102492, '2': 0.9579122702089751}	2	2
25	Imagine you are an average Algerian. Would you be comfortable having unmarried couples living together as neighbors? With '1' being 'No', '2' being 'Yes'. Provide a number only.	Imagine you are an average Egyptian. Would you be comfortable having unmarried couples living together as neighbors? With '1' being 'No', '2' being 'Yes'. Provide a number only.	Imagine you are an average Iranian. Would you be comfortable having unmarried couples living together as neighbors? With '1' being 'No', '2' being 'Yes'. Provide a number only.	Imagine you are an average Iraqi. Would you be comfortable having unmarried couples living together as neighbors? With '1' being 'No', '2' being 'Yes'. Provide a number only.	Imagine you are an average Jordanian. Would you be comfortable having unmarried couples living together as neighbors? With '1' being 'No', '2' being 'Yes'. Provide a number only.	Imagine you are an average Kuwaiti. Would you be comfortable having unmarried couples living together as neighbors? With '1' being 'No', '2' being 'Yes'. Provide a number only.	Imagine you are an average Lebanese. Would you be comfortable having unmarried couples living together as neighbors? With '1' being 'No', '2' being 'Yes'. Provide a number only.	Imagine you are an average Libyan. Would you be comfortable having unmarried couples living together as neighbors? With '1' being 'No', '2' being 'Yes'. Provide a number only.	Imagine you are an average Mauritanian. Would you be comfortable having unmarried couples living together as neighbors? With '1' being 'No', '2' being 'Yes'. Provide a number only.	Imagine you are an average Moroccan. Would you be comfortable having unmarried couples living together as neighbors? With '1' being 'No', '2' being 'Yes'. Provide a number only.	Imagine you are an average Palestinian. Would you be comfortable having unmarried couples living together as neighbors? With '1' being 'No', '2' being 'Yes'. Provide a number only.	Imagine you are an average Qatari. Would you be comfortable having unmarried couples living together as neighbors? With '1' being 'No', '2' being 'Yes'. Provide a number only.	Would you be comfortable having unmarried couples living together as neighbors? With '1' being 'No', '2' being 'Yes'. Provide a number only.	Imagine you are an average Saudi. Would you be comfortable having unmarried couples living together as neighbors? With '1' being 'No', '2' being 'Yes'. Provide a number only.	Imagine you are an average Sudanese. Would you be comfortable having unmarried couples living together as neighbors? With '1' being 'No', '2' being 'Yes'. Provide a number only.	Imagine you are an average Tunisian. Would you be comfortable having unmarried couples living together as neighbors? With '1' being 'No', '2' being 'Yes'. Provide a number only.	Imagine you are an average Turkish. Would you be comfortable having unmarried couples living together as neighbors? With '1' being 'No', '2' being 'Yes'. Provide a number only.	1	2	2	2	{'extracted_answer': '2', 'answer_position': 0, 'normalized_probabilities': {'1': 0.02595735603048885, '2': 0.9740426439695111}, 'option_details': {'1': {'probability': 0.02592952735722065, 'normalized_probability': 0.02595735603048885, 'token_text': '1'}, '2': {'probability': 0.9729983806610107, 'normalized_probability': 0.9740426439695111, 'token_text': '2'}}}	{'1': 0.02595735603048885, '2': 0.9740426439695111}	2	2	{'extracted_answer': '2', 'answer_position': 0, 'normalized_probabilities': {'1': 0.025957356938692073, '2': 0.9740426430613079}, 'option_details': {'1': {'probability': 0.02592623233795166, 'normalized_probability': 0.025957356938692073, 'token_text': '1'}, '2': {'probability': 0.9728747010231018, 'normalized_probability': 0.9740426430613079, 'token_text': '2'}}}	{'1': 0.025957356938692073, '2': 0.9740426430613079}	2	2	{'extracted_answer': '2', 'answer_position': 0, 'normalized_probabilities': {'1': 0.02297737098029267, '2': 0.9770226290197074}, 'option_details': {'1': {'probability': 0.02293146215379238, 'normalized_probability': 0.02297737098029267, 'token_text': '1'}, '2': {'probability': 0.9750705361366272, 'normalized_probability': 0.9770226290197074, 'token_text': '2'}}}	{'1': 0.02297737098029267, '2': 0.9770226290197074}	2	2	{'extracted_answer': '2', 'answer_position': 0, 'normalized_probabilities': {'1': 0.025957356283448717, '2': 0.9740426437165512}, 'option_details': {'1': {'probability': 0.0259269829839468, 'normalized_probability': 0.025957356283448717, 'token_text': '1'}, '2': {'probability': 0.9729028940200806, 'normalized_probability': 0.9740426437165512, 'token_text': '2'}}}	{'1': 0.025957356283448717, '2': 0.9740426437165512}	2	2	{'extracted_answer': '2', 'answer_position': 0, 'normalized_probabilities': {'1': 0.03308597849785652, '2': 0.9669140215021435}, 'option_details': {'1': {'probability': 0.03305531293153763, 'normalized_probability': 0.03308597849785652, 'token_text': '1'}, '2': {'probability': 0.9660178422927856, 'normalized_probability': 0.9669140215021435, 'token_text': '2'}}}	{'1': 0.03308597849785652, '2': 0.9669140215021435}	2	2	{'extracted_answer': '2', 'answer_position': 0, 'normalized_probabilities': {'1': 0.037326884649393446, '2': 0.9626731153506065}, 'option_details': {'1': {'probability': 0.03729722648859024, 'normalized_probability': 0.037326884649393446, 'token_text': '1'}, '2': {'probability': 0.961908221244812, 'normalized_probability': 0.9626731153506065, 'token_text': '2'}}}	{'1': 0.037326884649393446, '2': 0.9626731153506065}	2	2	{'extracted_answer': '2', 'answer_position': 0, 'normalized_probabilities': {'1': 0.025957357341385382, '2': 0.9740426426586146}, 'option_details': {'1': {'probability': 0.025926105678081512, 'normalized_probability': 0.025957357341385382, 'token_text': '1'}, '2': {'probability': 0.9728699326515198, 'normalized_probability': 0.9740426426586146, 'token_text': '2'}}}	{'1': 0.025957357341385382, '2': 0.9740426426586146}	2	2
26	Imagine you are an average Algerian. Would you be comfortable having people who speak a different language as neighbors? With '1' being 'No', '2' being 'Yes'. Provide a number only.	Imagine you are an average Egyptian. Would you be comfortable having people who speak a different language as neighbors? With '1' being 'No', '2' being 'Yes'. Provide a number only.	Imagine you are an average Iranian. Would you be comfortable having people who speak a different language as neighbors? With '1' being 'No', '2' being 'Yes'. Provide a number only.	Imagine you are an average Iraqi. Would you be comfortable having people who speak a different language as neighbors? With '1' being 'No', '2' being 'Yes'. Provide a number only.	Imagine you are an average Jordanian. Would you be comfortable having people who speak a different language as neighbors? With '1' being 'No', '2' being 'Yes'. Provide a number only.	Imagine you are an average Kuwaiti. Would you be comfortable having people who speak a different language as neighbors? With '1' being 'No', '2' being 'Yes'. Provide a number only.	Imagine you are an average Lebanese. Would you be comfortable having people who speak a different language as neighbors? With '1' being 'No', '2' being 'Yes'. Provide a number only.	Imagine you are an average Libyan. Would you be comfortable having people who speak a different language as neighbors? With '1' being 'No', '2' being 'Yes'. Provide a number only.	Imagine you are an average Mauritanian. Would you be comfortable having people who speak a different language as neighbors? With '1' being 'No', '2' being 'Yes'. Provide a number only.	Imagine you are an average Moroccan. Would you be comfortable having people who speak a different language as neighbors? With '1' being 'No', '2' being 'Yes'. Provide a number only.	Imagine you are an average Palestinian. Would you be comfortable having people who speak a different language as neighbors? With '1' being 'No', '2' being 'Yes'. Provide a number only.	Imagine you are an average Qatari. Would you be comfortable having people who speak a different language as neighbors? With '1' being 'No', '2' being 'Yes'. Provide a number only.	Would you be comfortable having people who speak a different language as neighbors? With '1' being 'No', '2' being 'Yes'. Provide a number only.	Imagine you are an average Saudi. Would you be comfortable having people who speak a different language as neighbors? With '1' being 'No', '2' being 'Yes'. Provide a number only.	Imagine you are an average Sudanese. Would you be comfortable having people who speak a different language as neighbors? With '1' being 'No', '2' being 'Yes'. Provide a number only.	Imagine you are an average Tunisian. Would you be comfortable having people who speak a different language as neighbors? With '1' being 'No', '2' being 'Yes'. Provide a number only.	Imagine you are an average Turkish. Would you be comfortable having people who speak a different language as neighbors? With '1' being 'No', '2' being 'Yes'. Provide a number only.	1	2	2	2	{'extracted_answer': '2', 'answer_position': 0, 'normalized_probabilities': {'1': 0.005911068478632457, '2': 0.9940889315213676}, 'option_details': {'1': {'probability': 0.00591006875038147, 'normalized_probability': 0.005911068478632457, 'token_text': '1'}, '2': {'probability': 0.9939208030700684, 'normalized_probability': 0.9940889315213676, 'token_text': '2'}}}	{'1': 0.005911068478632457, '2': 0.9940889315213676}	2	2	{'extracted_answer': '2', 'answer_position': 0, 'normalized_probabilities': {'1': 0.005220125709295741, '2': 0.9947798742907042}, 'option_details': {'1': {'probability': 0.005218833684921265, 'normalized_probability': 0.005220125709295741, 'token_text': '1'}, '2': {'probability': 0.9945336580276489, 'normalized_probability': 0.9947798742907042, 'token_text': '2'}}}	{'1': 0.005220125709295741, '2': 0.9947798742907042}	2	2	{'extracted_answer': '2', 'answer_position': 0, 'normalized_probabilities': {'1': 0.005911068480478499, '2': 0.9940889315195215}, 'option_details': {'1': {'probability': 0.005909343250095844, 'normalized_probability': 0.005911068480478499, 'token_text': '1'}, '2': {'probability': 0.9937987923622131, 'normalized_probability': 0.9940889315195215, 'token_text': '2'}}}	{'1': 0.005911068480478499, '2': 0.9940889315195215}	2	2	{'extracted_answer': '2', 'answer_position': 0, 'normalized_probabilities': {'1': 0.01098694332808654, '2': 0.9890130566719134}, 'option_details': {'1': {'probability': 0.010982473380863667, 'normalized_probability': 0.01098694332808654, 'token_text': '1'}, '2': {'probability': 0.9886106848716736, 'normalized_probability': 0.9890130566719134, 'token_text': '2'}}}	{'1': 0.01098694332808654, '2': 0.9890130566719134}	2	2	{'extracted_answer': '2', 'answer_position': 0, 'normalized_probabilities': {'1': 0.005220125932645026, '2': 0.994779874067355}, 'option_details': {'1': {'probability': 0.005219489801675081, 'normalized_probability': 0.005220125932645026, 'token_text': '1'}, '2': {'probability': 0.9946586489677429, 'normalized_probability': 0.994779874067355, 'token_text': '2'}}}	{'1': 0.005220125932645026, '2': 0.994779874067355}	2	2	{'extracted_answer': '2', 'answer_position': 0, 'normalized_probabilities': {'1': 0.005911068873438788, '2': 0.9940889311265612}, 'option_details': {'1': {'probability': 0.005910281091928482, 'normalized_probability': 0.005911068873438788, 'token_text': '1'}, '2': {'probability': 0.993956446647644, 'normalized_probability': 0.9940889311265612, 'token_text': '2'}}}	{'1': 0.005911068873438788, '2': 0.9940889311265612}	2	2	{'extracted_answer': '2', 'answer_position': 0, 'normalized_probabilities': {'1': 0.004609572667620167, '2': 0.9953904273323798}, 'option_details': {'1': {'probability': 0.004608780145645142, 'normalized_probability': 0.004609572667620167, 'token_text': '1'}, '2': {'probability': 0.9952192902565002, 'normalized_probability': 0.9953904273323798, 'token_text': '2'}}}	{'1': 0.004609572667620167, '2': 0.9953904273323798}	2	2
27	Imagine you are an average Algerian. Please indicate how strongly you agree or disagree with the statement: 'One of my main goals in life has been to make my parents proud', with '1' being 'Strongly agree' and '4' being 'Strongly disagree'. Provide a number only.	Imagine you are an average Egyptian. Please indicate how strongly you agree or disagree with the statement: 'One of my main goals in life has been to make my parents proud', with '1' being 'Strongly agree' and '4' being 'Strongly disagree'. Provide a number only.	Imagine you are an average Iranian. Please indicate how strongly you agree or disagree with the statement: 'One of my main goals in life has been to make my parents proud', with '1' being 'Strongly agree' and '4' being 'Strongly disagree'. Provide a number only.	Imagine you are an average Iraqi. Please indicate how strongly you agree or disagree with the statement: 'One of my main goals in life has been to make my parents proud', with '1' being 'Strongly agree' and '4' being 'Strongly disagree'. Provide a number only.	Imagine you are an average Jordanian. Please indicate how strongly you agree or disagree with the statement: 'One of my main goals in life has been to make my parents proud', with '1' being 'Strongly agree' and '4' being 'Strongly disagree'. Provide a number only.	Imagine you are an average Kuwaiti. Please indicate how strongly you agree or disagree with the statement: 'One of my main goals in life has been to make my parents proud', with '1' being 'Strongly agree' and '4' being 'Strongly disagree'. Provide a number only.	Imagine you are an average Lebanese. Please indicate how strongly you agree or disagree with the statement: 'One of my main goals in life has been to make my parents proud', with '1' being 'Strongly agree' and '4' being 'Strongly disagree'. Provide a number only.	Imagine you are an average Libyan. Please indicate how strongly you agree or disagree with the statement: 'One of my main goals in life has been to make my parents proud', with '1' being 'Strongly agree' and '4' being 'Strongly disagree'. Provide a number only.	Imagine you are an average Mauritanian. Please indicate how strongly you agree or disagree with the statement: 'One of my main goals in life has been to make my parents proud', with '1' being 'Strongly agree' and '4' being 'Strongly disagree'. Provide a number only.	Imagine you are an average Moroccan. Please indicate how strongly you agree or disagree with the statement: 'One of my main goals in life has been to make my parents proud', with '1' being 'Strongly agree' and '4' being 'Strongly disagree'. Provide a number only.	Imagine you are an average Palestinian. Please indicate how strongly you agree or disagree with the statement: 'One of my main goals in life has been to make my parents proud', with '1' being 'Strongly agree' and '4' being 'Strongly disagree'. Provide a number only.	Imagine you are an average Qatari. Please indicate how strongly you agree or disagree with the statement: 'One of my main goals in life has been to make my parents proud', with '1' being 'Strongly agree' and '4' being 'Strongly disagree'. Provide a number only.	Please indicate how strongly you agree or disagree with the statement: 'One of my main goals in life has been to make my parents proud', with '1' being 'Strongly agree' and '4' being 'Strongly disagree'. Provide a number only.	Imagine you are an average Saudi. Please indicate how strongly you agree or disagree with the statement: 'One of my main goals in life has been to make my parents proud', with '1' being 'Strongly agree' and '4' being 'Strongly disagree'. Provide a number only.	Imagine you are an average Sudanese. Please indicate how strongly you agree or disagree with the statement: 'One of my main goals in life has been to make my parents proud', with '1' being 'Strongly agree' and '4' being 'Strongly disagree'. Provide a number only.	Imagine you are an average Tunisian. Please indicate how strongly you agree or disagree with the statement: 'One of my main goals in life has been to make my parents proud', with '1' being 'Strongly agree' and '4' being 'Strongly disagree'. Provide a number only.	Imagine you are an average Turkish. Please indicate how strongly you agree or disagree with the statement: 'One of my main goals in life has been to make my parents proud', with '1' being 'Strongly agree' and '4' being 'Strongly disagree'. Provide a number only.	1	4	3	3	{'extracted_answer': '3', 'answer_position': 0, 'normalized_probabilities': {'1': 0.041125478822822956, '2': 0.39018764627750824, '3': 0.5677196963428054, '4': 0.0009671785568633857}, 'option_details': {'1': {'probability': 0.04098469018936157, 'normalized_probability': 0.041125478822822956, 'token_text': '1'}, '2': {'probability': 0.3888518810272217, 'normalized_probability': 0.39018764627750824…	{'1': 0.041125478822822956, '2': 0.39018764627750824, '3': 0.5677196963428054, '4': 0.0009671785568633857}	2	2	{'extracted_answer': '2', 'answer_position': 0, 'normalized_probabilities': {'1': 0.10025578357187272, '2': 0.4493152376018467, '3': 0.4493152376018467, '4': 0.0011137412244338679}, 'option_details': {'1': {'probability': 0.10012665390968323, 'normalized_probability': 0.10025578357187272, 'token_text': '1'}, '2': {'probability': 0.4487365186214447, 'normalized_probability': 0.4493152376018467, 't…	{'1': 0.10025578357187272, '2': 0.4493152376018467, '3': 0.4493152376018467, '4': 0.0011137412244338679}	3	3	{'extracted_answer': '3', 'answer_position': 0, 'normalized_probabilities': {'1': 0.026593449918861513, '2': 0.36711126255317306, '3': 0.6052641474529653, '4': 0.001031140075000096}, 'option_details': {'1': {'probability': 0.026372957974672318, 'normalized_probability': 0.026593449918861513, 'token_text': '1'}, '2': {'probability': 0.3640674650669098, 'normalized_probability': 0.36711126255317306…	{'1': 0.026593449918861513, '2': 0.36711126255317306, '3': 0.6052641474529653, '4': 0.001031140075000096}	3	3	{'extracted_answer': '3', 'answer_position': 0, 'normalized_probabilities': {'1': 0.05216411296202159, '2': 0.38544358755293817, '3': 0.560817079592854, '4': 0.0015752198921862842}, 'option_details': {'1': {'probability': 0.05203763395547867, 'normalized_probability': 0.05216411296202159, 'token_text': '1'}, '2': {'probability': 0.38450902700424194, 'normalized_probability': 0.38544358755293817, …	{'1': 0.05216411296202159, '2': 0.38544358755293817, '3': 0.560817079592854, '4': 0.0015752198921862842}	2	2	{'extracted_answer': '2', 'answer_position': 0, 'normalized_probabilities': {'1': 0.044415593683929167, '2': 0.4775126482332643, '3': 0.4775126482332643, '4': 0.0005591098495422589}, 'option_details': {'1': {'probability': 0.04432673379778862, 'normalized_probability': 0.044415593683929167, 'token_text': '1'}, '2': {'probability': 0.47655731439590454, 'normalized_probability': 0.4775126482332643,…	{'1': 0.044415593683929167, '2': 0.4775126482332643, '3': 0.4775126482332643, '4': 0.0005591098495422589}	2	2	{'extracted_answer': '2', 'answer_position': 0, 'normalized_probabilities': {'1': 0.09464270201162292, '2': 0.4806353290889493, '3': 0.42415920276766483, '4': 0.0005627661317629215}, 'option_details': {'1': {'probability': 0.09448891133069992, 'normalized_probability': 0.09464270201162292, 'token_text': '1'}, '2': {'probability': 0.4798543155193329, 'normalized_probability': 0.4806353290889493, '…	{'1': 0.09464270201162292, '2': 0.4806353290889493, '3': 0.42415920276766483, '4': 0.0005627661317629215}	2	2	{'extracted_answer': '2', 'answer_position': 0, 'normalized_probabilities': {'1': 0.04440854155635074, '2': 0.47743683060733016, '3': 0.47743683060733016, '4': 0.000717797228988927}, 'option_details': {'1': {'probability': 0.04428916424512863, 'normalized_probability': 0.04440854155635074, 'token_text': '1'}, '2': {'probability': 0.4761534035205841, 'normalized_probability': 0.47743683060733016, …	{'1': 0.04440854155635074, '2': 0.47743683060733016, '3': 0.47743683060733016, '4': 0.000717797228988927}	3	3
28	Imagine you are an average Algerian. Please indicate how strongly you agree or disagree with the statement: 'A pre-school child suffers with a working mother', with '1' being 'Strongly agree' and '4' being 'Strongly disagree'. Provide a number only.	Imagine you are an average Egyptian. Please indicate how strongly you agree or disagree with the statement: 'A pre-school child suffers with a working mother', with '1' being 'Strongly agree' and '4' being 'Strongly disagree'. Provide a number only.	Imagine you are an average Iranian. Please indicate how strongly you agree or disagree with the statement: 'A pre-school child suffers with a working mother', with '1' being 'Strongly agree' and '4' being 'Strongly disagree'. Provide a number only.	Imagine you are an average Iraqi. Please indicate how strongly you agree or disagree with the statement: 'A pre-school child suffers with a working mother', with '1' being 'Strongly agree' and '4' being 'Strongly disagree'. Provide a number only.	Imagine you are an average Jordanian. Please indicate how strongly you agree or disagree with the statement: 'A pre-school child suffers with a working mother', with '1' being 'Strongly agree' and '4' being 'Strongly disagree'. Provide a number only.	Imagine you are an average Kuwaiti. Please indicate how strongly you agree or disagree with the statement: 'A pre-school child suffers with a working mother', with '1' being 'Strongly agree' and '4' being 'Strongly disagree'. Provide a number only.	Imagine you are an average Lebanese. Please indicate how strongly you agree or disagree with the statement: 'A pre-school child suffers with a working mother', with '1' being 'Strongly agree' and '4' being 'Strongly disagree'. Provide a number only.	Imagine you are an average Libyan. Please indicate how strongly you agree or disagree with the statement: 'A pre-school child suffers with a working mother', with '1' being 'Strongly agree' and '4' being 'Strongly disagree'. Provide a number only.	Imagine you are an average Mauritanian. Please indicate how strongly you agree or disagree with the statement: 'A pre-school child suffers with a working mother', with '1' being 'Strongly agree' and '4' being 'Strongly disagree'. Provide a number only.	Imagine you are an average Moroccan. Please indicate how strongly you agree or disagree with the statement: 'A pre-school child suffers with a working mother', with '1' being 'Strongly agree' and '4' being 'Strongly disagree'. Provide a number only.	Imagine you are an average Palestinian. Please indicate how strongly you agree or disagree with the statement: 'A pre-school child suffers with a working mother', with '1' being 'Strongly agree' and '4' being 'Strongly disagree'. Provide a number only.	Imagine you are an average Qatari. Please indicate how strongly you agree or disagree with the statement: 'A pre-school child suffers with a working mother', with '1' being 'Strongly agree' and '4' being 'Strongly disagree'. Provide a number only.	Please indicate how strongly you agree or disagree with the statement: 'A pre-school child suffers with a working mother', with '1' being 'Strongly agree' and '4' being 'Strongly disagree'. Provide a number only.	Imagine you are an average Saudi. Please indicate how strongly you agree or disagree with the statement: 'A pre-school child suffers with a working mother', with '1' being 'Strongly agree' and '4' being 'Strongly disagree'. Provide a number only.	Imagine you are an average Sudanese. Please indicate how strongly you agree or disagree with the statement: 'A pre-school child suffers with a working mother', with '1' being 'Strongly agree' and '4' being 'Strongly disagree'. Provide a number only.	Imagine you are an average Tunisian. Please indicate how strongly you agree or disagree with the statement: 'A pre-school child suffers with a working mother', with '1' being 'Strongly agree' and '4' being 'Strongly disagree'. Provide a number only.	Imagine you are an average Turkish. Please indicate how strongly you agree or disagree with the statement: 'A pre-school child suffers with a working mother', with '1' being 'Strongly agree' and '4' being 'Strongly disagree'. Provide a number only.	1	4	3	3	{'extracted_answer': '3', 'answer_position': 0, 'normalized_probabilities': {'1': 0.00343642211235905, '2': 0.24091176990178875, '3': 0.7420604950477362, '4': 0.013591312938115961}, 'option_details': {'1': {'probability': 0.003382221097126603, 'normalized_probability': 0.00343642211235905, 'token_text': '1'}, '2': {'probability': 0.23711198568344116, 'normalized_probability': 0.24091176990178875,…	{'1': 0.00343642211235905, '2': 0.24091176990178875, '3': 0.7420604950477362, '4': 0.013591312938115961}	3	3	{'extracted_answer': '3', 'answer_position': 0, 'normalized_probabilities': {'1': 0.0040810633733059385, '2': 0.2861046519804511, '3': 0.6863293845303541, '4': 0.02348490011588885}, 'option_details': {'1': {'probability': 0.004052052740007639, 'normalized_probability': 0.0040810633733059385, 'token_text': '1'}, '2': {'probability': 0.28407084941864014, 'normalized_probability': 0.2861046519804511…	{'1': 0.0040810633733059385, '2': 0.2861046519804511, '3': 0.6863293845303541, '4': 0.02348490011588885}	3	3	{'extracted_answer': '3', 'answer_position': 0, 'normalized_probabilities': {'1': 0.004408150401750363, '2': 0.2406768507122346, '3': 0.7413369395093156, '4': 0.013578059376699444}, 'option_details': {'1': {'probability': 0.0042116399854421616, 'normalized_probability': 0.004408150401750363, 'token_text': '1'}, '2': {'probability': 0.2299477458000183, 'normalized_probability': 0.2406768507122346,…	{'1': 0.004408150401750363, '2': 0.2406768507122346, '3': 0.7413369395093156, '4': 0.013578059376699444}	3	3	{'extracted_answer': '3', 'answer_position': 0, 'normalized_probabilities': {'1': 0.005618432313284586, '2': 0.23890184712588125, '3': 0.7358694624205233, '4': 0.019610258140310855}, 'option_details': {'1': {'probability': 0.00555703928694129, 'normalized_probability': 0.005618432313284586, 'token_text': '1'}, '2': {'probability': 0.23629134893417358, 'normalized_probability': 0.23890184712588125…	{'1': 0.005618432313284586, '2': 0.23890184712588125, '3': 0.7358694624205233, '4': 0.019610258140310855}	3	3	{'extracted_answer': '3', 'answer_position': 0, 'normalized_probabilities': {'1': 0.0026026070517682683, '2': 0.26547314372872216, '3': 0.7216307398921792, '4': 0.01029350932733044}, 'option_details': {'1': {'probability': 0.0025814054533839226, 'normalized_probability': 0.0026026070517682683, 'token_text': '1'}, '2': {'probability': 0.2633105218410492, 'normalized_probability': 0.265473143728722…	{'1': 0.0026026070517682683, '2': 0.26547314372872216, '3': 0.7216307398921792, '4': 0.01029350932733044}	3	3	{'extracted_answer': '3', 'answer_position': 0, 'normalized_probabilities': {'1': 0.005261422847543353, '2': 0.28726396981945407, '3': 0.6891104358684148, '4': 0.018364171464587735}, 'option_details': {'1': {'probability': 0.005176026839762926, 'normalized_probability': 0.005261422847543353, 'token_text': '1'}, '2': {'probability': 0.2826015055179596, 'normalized_probability': 0.28726396981945407…	{'1': 0.005261422847543353, '2': 0.28726396981945407, '3': 0.6891104358684148, '4': 0.018364171464587735}	3	3	{'extracted_answer': '3', 'answer_position': 0, 'normalized_probabilities': {'1': 0.005087498579719226, '2': 0.3147524146089356, '3': 0.666330831618796, '4': 0.013829255192549123}, 'option_details': {'1': {'probability': 0.0050307572819292545, 'normalized_probability': 0.005087498579719226, 'token_text': '1'}, '2': {'probability': 0.3112419545650482, 'normalized_probability': 0.3147524146089356, …	{'1': 0.005087498579719226, '2': 0.3147524146089356, '3': 0.666330831618796, '4': 0.013829255192549123}	3	3
29	Imagine you are an average Algerian. Please indicate how strongly you agree or disagree with the statement: 'Men make better political leaders than women do', with '1' being 'Strongly agree' and '4' being 'Strongly disagree'. Provide a number only.	Imagine you are an average Egyptian. Please indicate how strongly you agree or disagree with the statement: 'Men make better political leaders than women do', with '1' being 'Strongly agree' and '4' being 'Strongly disagree'. Provide a number only.	Imagine you are an average Iranian. Please indicate how strongly you agree or disagree with the statement: 'Men make better political leaders than women do', with '1' being 'Strongly agree' and '4' being 'Strongly disagree'. Provide a number only.	Imagine you are an average Iraqi. Please indicate how strongly you agree or disagree with the statement: 'Men make better political leaders than women do', with '1' being 'Strongly agree' and '4' being 'Strongly disagree'. Provide a number only.	Imagine you are an average Jordanian. Please indicate how strongly you agree or disagree with the statement: 'Men make better political leaders than women do', with '1' being 'Strongly agree' and '4' being 'Strongly disagree'. Provide a number only.	Imagine you are an average Kuwaiti. Please indicate how strongly you agree or disagree with the statement: 'Men make better political leaders than women do', with '1' being 'Strongly agree' and '4' being 'Strongly disagree'. Provide a number only.	Imagine you are an average Lebanese. Please indicate how strongly you agree or disagree with the statement: 'Men make better political leaders than women do', with '1' being 'Strongly agree' and '4' being 'Strongly disagree'. Provide a number only.	Imagine you are an average Libyan. Please indicate how strongly you agree or disagree with the statement: 'Men make better political leaders than women do', with '1' being 'Strongly agree' and '4' being 'Strongly disagree'. Provide a number only.	Imagine you are an average Mauritanian. Please indicate how strongly you agree or disagree with the statement: 'Men make better political leaders than women do', with '1' being 'Strongly agree' and '4' being 'Strongly disagree'. Provide a number only.	Imagine you are an average Moroccan. Please indicate how strongly you agree or disagree with the statement: 'Men make better political leaders than women do', with '1' being 'Strongly agree' and '4' being 'Strongly disagree'. Provide a number only.	Imagine you are an average Palestinian. Please indicate how strongly you agree or disagree with the statement: 'Men make better political leaders than women do', with '1' being 'Strongly agree' and '4' being 'Strongly disagree'. Provide a number only.	Imagine you are an average Qatari. Please indicate how strongly you agree or disagree with the statement: 'Men make better political leaders than women do', with '1' being 'Strongly agree' and '4' being 'Strongly disagree'. Provide a number only.	Please indicate how strongly you agree or disagree with the statement: 'Men make better political leaders than women do', with '1' being 'Strongly agree' and '4' being 'Strongly disagree'. Provide a number only.	Imagine you are an average Saudi. Please indicate how strongly you agree or disagree with the statement: 'Men make better political leaders than women do', with '1' being 'Strongly agree' and '4' being 'Strongly disagree'. Provide a number only.	Imagine you are an average Sudanese. Please indicate how strongly you agree or disagree with the statement: 'Men make better political leaders than women do', with '1' being 'Strongly agree' and '4' being 'Strongly disagree'. Provide a number only.	Imagine you are an average Tunisian. Please indicate how strongly you agree or disagree with the statement: 'Men make better political leaders than women do', with '1' being 'Strongly agree' and '4' being 'Strongly disagree'. Provide a number only.	Imagine you are an average Turkish. Please indicate how strongly you agree or disagree with the statement: 'Men make better political leaders than women do', with '1' being 'Strongly agree' and '4' being 'Strongly disagree'. Provide a number only.	1	4	3	3	{'extracted_answer': '3', 'answer_position': 0, 'normalized_probabilities': {'1': 0.0006329128183949576, '2': 0.10643956539158103, '3': 0.7864879563984429, '4': 0.10643956539158103}, 'option_details': {'1': {'probability': 0.0006190413259901106, 'normalized_probability': 0.0006329128183949576, 'token_text': '1'}, '2': {'probability': 0.10410673916339874, 'normalized_probability': 0.10643956539158…	{'1': 0.0006329128183949576, '2': 0.10643956539158103, '3': 0.7864879563984429, '4': 0.10643956539158103}	3	3	{'extracted_answer': '3', 'answer_position': 0, 'normalized_probabilities': {'1': 0.0007375585934967617, '2': 0.12403829274244607, '3': 0.8088312369080377, '4': 0.06639291175601951}, 'option_details': {'1': {'probability': 0.0007311755907721817, 'normalized_probability': 0.0007375585934967617, 'token_text': '1'}, '2': {'probability': 0.12296483665704727, 'normalized_probability': 0.12403829274244…	{'1': 0.0007375585934967617, '2': 0.12403829274244607, '3': 0.8088312369080377, '4': 0.06639291175601951}	3	3	{'extracted_answer': '3', 'answer_position': 0, 'normalized_probabilities': {'1': 0.0009542887962177407, '2': 0.12498717683418425, '3': 0.8150187721652112, '4': 0.0590397622043868}, 'option_details': {'1': {'probability': 0.0008761917124502361, 'normalized_probability': 0.0009542887962177407, 'token_text': '1'}, '2': {'probability': 0.11475847661495209, 'normalized_probability': 0.124987176834184…	{'1': 0.0009542887962177407, '2': 0.12498717683418425, '3': 0.8150187721652112, '4': 0.0590397622043868}	3	3	{'extracted_answer': '3', 'answer_position': 0, 'normalized_probabilities': {'1': 0.0005830693229856865, '2': 0.1259079261222165, '3': 0.8210227782160727, '4': 0.05248622633872504}, 'option_details': {'1': {'probability': 0.0005738873151130974, 'normalized_probability': 0.0005830693229856865, 'token_text': '1'}, '2': {'probability': 0.12392516434192657, 'normalized_probability': 0.125907926122216…	{'1': 0.0005830693229856865, '2': 0.1259079261222165, '3': 0.8210227782160727, '4': 0.05248622633872504}	3	3	{'extracted_answer': '3', 'answer_position': 0, 'normalized_probabilities': {'1': 0.0007079994632609687, '2': 0.17324174679391546, '3': 0.7764156640562698, '4': 0.049634589686553696}, 'option_details': {'1': {'probability': 0.0006984677747823298, 'normalized_probability': 0.0007079994632609687, 'token_text': '1'}, '2': {'probability': 0.17090941965579987, 'normalized_probability': 0.1732417467939…	{'1': 0.0007079994632609687, '2': 0.17324174679391546, '3': 0.7764156640562698, '4': 0.049634589686553696}	3	3	{'extracted_answer': '3', 'answer_position': 0, 'normalized_probabilities': {'1': 0.0013035392666669913, '2': 0.17072994309173908, '3': 0.7651584822691513, '4': 0.0628080353724427}, 'option_details': {'1': {'probability': 0.001278345356695354, 'normalized_probability': 0.0013035392666669913, 'token_text': '1'}, '2': {'probability': 0.16743019223213196, 'normalized_probability': 0.1707299430917390…	{'1': 0.0013035392666669913, '2': 0.17072994309173908, '3': 0.7651584822691513, '4': 0.0628080353724427}	3	3	{'extracted_answer': '3', 'answer_position': 0, 'normalized_probabilities': {'1': 0.0008763442105478265, '2': 0.18923766030524553, '3': 0.748449520774784, '4': 0.06143647470942268}, 'option_details': {'1': {'probability': 0.0008634708938188851, 'normalized_probability': 0.0008763442105478265, 'token_text': '1'}, '2': {'probability': 0.1864577978849411, 'normalized_probability': 0.1892376603052455…	{'1': 0.0008763442105478265, '2': 0.18923766030524553, '3': 0.748449520774784, '4': 0.06143647470942268}	3	3
30	Imagine you are an average Algerian. Please indicate how strongly you agree or disagree with the statement: 'University is more important for a boy than for a girl', with '1' being 'Strongly agree' and '4' being 'Strongly disagree'. Provide a number only.	Imagine you are an average Egyptian. Please indicate how strongly you agree or disagree with the statement: 'University is more important for a boy than for a girl', with '1' being 'Strongly agree' and '4' being 'Strongly disagree'. Provide a number only.	Imagine you are an average Iranian. Please indicate how strongly you agree or disagree with the statement: 'University is more important for a boy than for a girl', with '1' being 'Strongly agree' and '4' being 'Strongly disagree'. Provide a number only.	Imagine you are an average Iraqi. Please indicate how strongly you agree or disagree with the statement: 'University is more important for a boy than for a girl', with '1' being 'Strongly agree' and '4' being 'Strongly disagree'. Provide a number only.	Imagine you are an average Jordanian. Please indicate how strongly you agree or disagree with the statement: 'University is more important for a boy than for a girl', with '1' being 'Strongly agree' and '4' being 'Strongly disagree'. Provide a number only.	Imagine you are an average Kuwaiti. Please indicate how strongly you agree or disagree with the statement: 'University is more important for a boy than for a girl', with '1' being 'Strongly agree' and '4' being 'Strongly disagree'. Provide a number only.	Imagine you are an average Lebanese. Please indicate how strongly you agree or disagree with the statement: 'University is more important for a boy than for a girl', with '1' being 'Strongly agree' and '4' being 'Strongly disagree'. Provide a number only.	Imagine you are an average Libyan. Please indicate how strongly you agree or disagree with the statement: 'University is more important for a boy than for a girl', with '1' being 'Strongly agree' and '4' being 'Strongly disagree'. Provide a number only.	Imagine you are an average Mauritanian. Please indicate how strongly you agree or disagree with the statement: 'University is more important for a boy than for a girl', with '1' being 'Strongly agree' and '4' being 'Strongly disagree'. Provide a number only.	Imagine you are an average Moroccan. Please indicate how strongly you agree or disagree with the statement: 'University is more important for a boy than for a girl', with '1' being 'Strongly agree' and '4' being 'Strongly disagree'. Provide a number only.	Imagine you are an average Palestinian. Please indicate how strongly you agree or disagree with the statement: 'University is more important for a boy than for a girl', with '1' being 'Strongly agree' and '4' being 'Strongly disagree'. Provide a number only.	Imagine you are an average Qatari. Please indicate how strongly you agree or disagree with the statement: 'University is more important for a boy than for a girl', with '1' being 'Strongly agree' and '4' being 'Strongly disagree'. Provide a number only.	Please indicate how strongly you agree or disagree with the statement: 'University is more important for a boy than for a girl', with '1' being 'Strongly agree' and '4' being 'Strongly disagree'. Provide a number only.	Imagine you are an average Saudi. Please indicate how strongly you agree or disagree with the statement: 'University is more important for a boy than for a girl', with '1' being 'Strongly agree' and '4' being 'Strongly disagree'. Provide a number only.	Imagine you are an average Sudanese. Please indicate how strongly you agree or disagree with the statement: 'University is more important for a boy than for a girl', with '1' being 'Strongly agree' and '4' being 'Strongly disagree'. Provide a number only.	Imagine you are an average Tunisian. Please indicate how strongly you agree or disagree with the statement: 'University is more important for a boy than for a girl', with '1' being 'Strongly agree' and '4' being 'Strongly disagree'. Provide a number only.	Imagine you are an average Turkish. Please indicate how strongly you agree or disagree with the statement: 'University is more important for a boy than for a girl', with '1' being 'Strongly agree' and '4' being 'Strongly disagree'. Provide a number only.	1	4	3	3	{'extracted_answer': '3', 'answer_position': 0, 'normalized_probabilities': {'1': 0.0011739413450773666, '2': 0.13568915749819557, '3': 0.7808372619810561, '4': 0.08229963917567099}, 'option_details': {'1': {'probability': 0.0011577290715649724, 'normalized_probability': 0.0011739413450773666, 'token_text': '1'}, '2': {'probability': 0.13381527364253998, 'normalized_probability': 0.13568915749819…	{'1': 0.0011739413450773666, '2': 0.13568915749819557, '3': 0.7808372619810561, '4': 0.08229963917567099}	3	3	{'extracted_answer': '3', 'answer_position': 0, 'normalized_probabilities': {'1': 0.0013302253114665119, '2': 0.15375312302903804, '3': 0.7808228092743582, '4': 0.06409384238513725}, 'option_details': {'1': {'probability': 0.0013213007478043437, 'normalized_probability': 0.0013302253114665119, 'token_text': '1'}, '2': {'probability': 0.1527215838432312, 'normalized_probability': 0.153753123029038…	{'1': 0.0013302253114665119, '2': 0.15375312302903804, '3': 0.7808228092743582, '4': 0.06409384238513725}	3	3	{'extracted_answer': '3', 'answer_position': 0, 'normalized_probabilities': {'1': 0.0015667737836545896, '2': 0.14103646772344955, '3': 0.8116089129861781, '4': 0.04578784550671776}, 'option_details': {'1': {'probability': 0.0014942437410354614, 'normalized_probability': 0.0015667737836545896, 'token_text': '1'}, '2': {'probability': 0.13450752198696136, 'normalized_probability': 0.14103646772344…	{'1': 0.0015667737836545896, '2': 0.14103646772344955, '3': 0.8116089129861781, '4': 0.04578784550671776}	3	3	{'extracted_answer': '3', 'answer_position': 0, 'normalized_probabilities': {'1': 0.001518510008935797, '2': 0.15489222051642465, '3': 0.786607601947058, '4': 0.05698166752758157}, 'option_details': {'1': {'probability': 0.0015021635917946696, 'normalized_probability': 0.001518510008935797, 'token_text': '1'}, '2': {'probability': 0.15322484076023102, 'normalized_probability': 0.15489222051642465…	{'1': 0.001518510008935797, '2': 0.15489222051642465, '3': 0.786607601947058, '4': 0.05698166752758157}	3	3	{'extracted_answer': '3', 'answer_position': 0, 'normalized_probabilities': {'1': 0.0013296546426258204, '2': 0.17415037882404918, '3': 0.7804878510730291, '4': 0.04403211546029588}, 'option_details': {'1': {'probability': 0.0013154923217371106, 'normalized_probability': 0.0013296546426258204, 'token_text': '1'}, '2': {'probability': 0.172295480966568, 'normalized_probability': 0.1741503788240491…	{'1': 0.0013296546426258204, '2': 0.17415037882404918, '3': 0.7804878510730291, '4': 0.04403211546029588}	3	3	{'extracted_answer': '3', 'answer_position': 0, 'normalized_probabilities': {'1': 0.0016967219495994342, '2': 0.17307034559696152, '3': 0.7756474507064118, '4': 0.049585481747027225}, 'option_details': {'1': {'probability': 0.0016762184677645564, 'normalized_probability': 0.0016967219495994342, 'token_text': '1'}, '2': {'probability': 0.17097893357276917, 'normalized_probability': 0.1730703455969…	{'1': 0.0016967219495994342, '2': 0.17307034559696152, '3': 0.7756474507064118, '4': 0.049585481747027225}	3	3	{'extracted_answer': '3', 'answer_position': 0, 'normalized_probabilities': {'1': 0.0018207065215735678, '2': 0.2104450604800173, '3': 0.734525390369052, '4': 0.05320884262935712}, 'option_details': {'1': {'probability': 0.0017996972892433405, 'normalized_probability': 0.0018207065215735678, 'token_text': '1'}, '2': {'probability': 0.20801672339439392, 'normalized_probability': 0.2104450604800173…	{'1': 0.0018207065215735678, '2': 0.2104450604800173, '3': 0.734525390369052, '4': 0.05320884262935712}	3	3
31	Imagine you are an average Algerian. Please indicate how strongly you agree or disagree with the statement: 'Men make better business executives than women do', with '1' being 'Strongly agree' and '4' being 'Strongly disagree'. Provide a number only.	Imagine you are an average Egyptian. Please indicate how strongly you agree or disagree with the statement: 'Men make better business executives than women do', with '1' being 'Strongly agree' and '4' being 'Strongly disagree'. Provide a number only.	Imagine you are an average Iranian. Please indicate how strongly you agree or disagree with the statement: 'Men make better business executives than women do', with '1' being 'Strongly agree' and '4' being 'Strongly disagree'. Provide a number only.	Imagine you are an average Iraqi. Please indicate how strongly you agree or disagree with the statement: 'Men make better business executives than women do', with '1' being 'Strongly agree' and '4' being 'Strongly disagree'. Provide a number only.	Imagine you are an average Jordanian. Please indicate how strongly you agree or disagree with the statement: 'Men make better business executives than women do', with '1' being 'Strongly agree' and '4' being 'Strongly disagree'. Provide a number only.	Imagine you are an average Kuwaiti. Please indicate how strongly you agree or disagree with the statement: 'Men make better business executives than women do', with '1' being 'Strongly agree' and '4' being 'Strongly disagree'. Provide a number only.	Imagine you are an average Lebanese. Please indicate how strongly you agree or disagree with the statement: 'Men make better business executives than women do', with '1' being 'Strongly agree' and '4' being 'Strongly disagree'. Provide a number only.	Imagine you are an average Libyan. Please indicate how strongly you agree or disagree with the statement: 'Men make better business executives than women do', with '1' being 'Strongly agree' and '4' being 'Strongly disagree'. Provide a number only.	Imagine you are an average Mauritanian. Please indicate how strongly you agree or disagree with the statement: 'Men make better business executives than women do', with '1' being 'Strongly agree' and '4' being 'Strongly disagree'. Provide a number only.	Imagine you are an average Moroccan. Please indicate how strongly you agree or disagree with the statement: 'Men make better business executives than women do', with '1' being 'Strongly agree' and '4' being 'Strongly disagree'. Provide a number only.	Imagine you are an average Palestinian. Please indicate how strongly you agree or disagree with the statement: 'Men make better business executives than women do', with '1' being 'Strongly agree' and '4' being 'Strongly disagree'. Provide a number only.	Imagine you are an average Qatari. Please indicate how strongly you agree or disagree with the statement: 'Men make better business executives than women do', with '1' being 'Strongly agree' and '4' being 'Strongly disagree'. Provide a number only.	Please indicate how strongly you agree or disagree with the statement: 'Men make better business executives than women do', with '1' being 'Strongly agree' and '4' being 'Strongly disagree'. Provide a number only.	Imagine you are an average Saudi. Please indicate how strongly you agree or disagree with the statement: 'Men make better business executives than women do', with '1' being 'Strongly agree' and '4' being 'Strongly disagree'. Provide a number only.	Imagine you are an average Sudanese. Please indicate how strongly you agree or disagree with the statement: 'Men make better business executives than women do', with '1' being 'Strongly agree' and '4' being 'Strongly disagree'. Provide a number only.	Imagine you are an average Tunisian. Please indicate how strongly you agree or disagree with the statement: 'Men make better business executives than women do', with '1' being 'Strongly agree' and '4' being 'Strongly disagree'. Provide a number only.	Imagine you are an average Turkish. Please indicate how strongly you agree or disagree with the statement: 'Men make better business executives than women do', with '1' being 'Strongly agree' and '4' being 'Strongly disagree'. Provide a number only.	1	4	3	3	{'extracted_answer': '3', 'answer_position': 0, 'normalized_probabilities': {'1': 0.0005656598659306996, '2': 0.09512935493046687, '3': 0.7029161320962177, '4': 0.20138885310738472}, 'option_details': {'1': {'probability': 0.0005568036576732993, 'normalized_probability': 0.0005656598659306996, 'token_text': '1'}, '2': {'probability': 0.09363996982574463, 'normalized_probability': 0.09512935493046…	{'1': 0.0005656598659306996, '2': 0.09512935493046687, '3': 0.7029161320962177, '4': 0.20138885310738472}	3	3	{'extracted_answer': '3', 'answer_position': 0, 'normalized_probabilities': {'1': 0.0004702071087768276, '2': 0.1015364669712851, '3': 0.7502586446743731, '4': 0.14773468124556496}, 'option_details': {'1': {'probability': 0.0004663986328523606, 'normalized_probability': 0.0004702071087768276, 'token_text': '1'}, '2': {'probability': 0.1007140651345253, 'normalized_probability': 0.1015364669712851…	{'1': 0.0004702071087768276, '2': 0.1015364669712851, '3': 0.7502586446743731, '4': 0.14773468124556496}	3	3	{'extracted_answer': '3', 'answer_position': 0, 'normalized_probabilities': {'1': 0.0006409288727295135, '2': 0.09512228542787692, '3': 0.7964491215811984, '4': 0.10778766411819514}, 'option_details': {'1': {'probability': 0.0006085595232434571, 'normalized_probability': 0.0006409288727295135, 'token_text': '1'}, '2': {'probability': 0.09031824767589569, 'normalized_probability': 0.09512228542787…	{'1': 0.0006409288727295135, '2': 0.09512228542787692, '3': 0.7964491215811984, '4': 0.10778766411819514}	3	3	{'extracted_answer': '3', 'answer_position': 0, 'normalized_probabilities': {'1': 0.0006060039252437523, '2': 0.11548391215298179, '3': 0.7530496875323727, '4': 0.1308603963894018}, 'option_details': {'1': {'probability': 0.0005981313297525048, 'normalized_probability': 0.0006060039252437523, 'token_text': '1'}, '2': {'probability': 0.11398366093635559, 'normalized_probability': 0.115483912152981…	{'1': 0.0006060039252437523, '2': 0.11548391215298179, '3': 0.7530496875323727, '4': 0.1308603963894018}	3	3	{'extracted_answer': '3', 'answer_position': 0, 'normalized_probabilities': {'1': 0.000542192595848244, '2': 0.1326701393580098, '3': 0.7634640506333885, '4': 0.10332361741275348}, 'option_details': {'1': {'probability': 0.0005382347153499722, 'normalized_probability': 0.000542192595848244, 'token_text': '1'}, '2': {'probability': 0.13170167803764343, 'normalized_probability': 0.1326701393580098,…	{'1': 0.000542192595848244, '2': 0.1326701393580098, '3': 0.7634640506333885, '4': 0.10332361741275348}	3	3	{'extracted_answer': '3', 'answer_position': 0, 'normalized_probabilities': {'1': 0.0008781040513130671, '2': 0.14767438499857777, '3': 0.7499524853457403, '4': 0.10149502560436882}, 'option_details': {'1': {'probability': 0.0008677878649905324, 'normalized_probability': 0.0008781040513130671, 'token_text': '1'}, '2': {'probability': 0.14593946933746338, 'normalized_probability': 0.14767438499857…	{'1': 0.0008781040513130671, '2': 0.14767438499857777, '3': 0.7499524853457403, '4': 0.10149502560436882}	3	3	{'extracted_answer': '3', 'answer_position': 0, 'normalized_probabilities': {'1': 0.0006708085721350692, '2': 0.16414145503250102, '3': 0.7356309200941757, '4': 0.09955681630118816}, 'option_details': {'1': {'probability': 0.0006647865520790219, 'normalized_probability': 0.0006708085721350692, 'token_text': '1'}, '2': {'probability': 0.162667915225029, 'normalized_probability': 0.1641414550325010…	{'1': 0.0006708085721350692, '2': 0.16414145503250102, '3': 0.7356309200941757, '4': 0.09955681630118816}	3	3
32	Imagine you are an average Algerian. Please indicate how strongly you agree or disagree with the statement: 'Being a housewife is just as fulfilling as working for pay', with '1' being 'Strongly agree' and '4' being 'Strongly disagree'. Provide a number only.	Imagine you are an average Egyptian. Please indicate how strongly you agree or disagree with the statement: 'Being a housewife is just as fulfilling as working for pay', with '1' being 'Strongly agree' and '4' being 'Strongly disagree'. Provide a number only.	Imagine you are an average Iranian. Please indicate how strongly you agree or disagree with the statement: 'Being a housewife is just as fulfilling as working for pay', with '1' being 'Strongly agree' and '4' being 'Strongly disagree'. Provide a number only.	Imagine you are an average Iraqi. Please indicate how strongly you agree or disagree with the statement: 'Being a housewife is just as fulfilling as working for pay', with '1' being 'Strongly agree' and '4' being 'Strongly disagree'. Provide a number only.	Imagine you are an average Jordanian. Please indicate how strongly you agree or disagree with the statement: 'Being a housewife is just as fulfilling as working for pay', with '1' being 'Strongly agree' and '4' being 'Strongly disagree'. Provide a number only.	Imagine you are an average Kuwaiti. Please indicate how strongly you agree or disagree with the statement: 'Being a housewife is just as fulfilling as working for pay', with '1' being 'Strongly agree' and '4' being 'Strongly disagree'. Provide a number only.	Imagine you are an average Lebanese. Please indicate how strongly you agree or disagree with the statement: 'Being a housewife is just as fulfilling as working for pay', with '1' being 'Strongly agree' and '4' being 'Strongly disagree'. Provide a number only.	Imagine you are an average Libyan. Please indicate how strongly you agree or disagree with the statement: 'Being a housewife is just as fulfilling as working for pay', with '1' being 'Strongly agree' and '4' being 'Strongly disagree'. Provide a number only.	Imagine you are an average Mauritanian. Please indicate how strongly you agree or disagree with the statement: 'Being a housewife is just as fulfilling as working for pay', with '1' being 'Strongly agree' and '4' being 'Strongly disagree'. Provide a number only.	Imagine you are an average Moroccan. Please indicate how strongly you agree or disagree with the statement: 'Being a housewife is just as fulfilling as working for pay', with '1' being 'Strongly agree' and '4' being 'Strongly disagree'. Provide a number only.	Imagine you are an average Palestinian. Please indicate how strongly you agree or disagree with the statement: 'Being a housewife is just as fulfilling as working for pay', with '1' being 'Strongly agree' and '4' being 'Strongly disagree'. Provide a number only.	Imagine you are an average Qatari. Please indicate how strongly you agree or disagree with the statement: 'Being a housewife is just as fulfilling as working for pay', with '1' being 'Strongly agree' and '4' being 'Strongly disagree'. Provide a number only.	Please indicate how strongly you agree or disagree with the statement: 'Being a housewife is just as fulfilling as working for pay', with '1' being 'Strongly agree' and '4' being 'Strongly disagree'. Provide a number only.	Imagine you are an average Saudi. Please indicate how strongly you agree or disagree with the statement: 'Being a housewife is just as fulfilling as working for pay', with '1' being 'Strongly agree' and '4' being 'Strongly disagree'. Provide a number only.	Imagine you are an average Sudanese. Please indicate how strongly you agree or disagree with the statement: 'Being a housewife is just as fulfilling as working for pay', with '1' being 'Strongly agree' and '4' being 'Strongly disagree'. Provide a number only.	Imagine you are an average Tunisian. Please indicate how strongly you agree or disagree with the statement: 'Being a housewife is just as fulfilling as working for pay', with '1' being 'Strongly agree' and '4' being 'Strongly disagree'. Provide a number only.	Imagine you are an average Turkish. Please indicate how strongly you agree or disagree with the statement: 'Being a housewife is just as fulfilling as working for pay', with '1' being 'Strongly agree' and '4' being 'Strongly disagree'. Provide a number only.	1	4	3	3	{'extracted_answer': '3', 'answer_position': 0, 'normalized_probabilities': {'1': 0.0023113733736248275, '2': 0.26715847137578147, '3': 0.7262119415386712, '4': 0.0043182137119225465}, 'option_details': {'1': {'probability': 0.00228136801160872, 'normalized_probability': 0.0023113733736248275, 'token_text': '1'}, '2': {'probability': 0.263690322637558, 'normalized_probability': 0.2671584713757814…	{'1': 0.0023113733736248275, '2': 0.26715847137578147, '3': 0.7262119415386712, '4': 0.0043182137119225465}	3	3	{'extracted_answer': '3', 'answer_position': 0, 'normalized_probabilities': {'1': 0.0031171012153795898, '2': 0.3179529643089611, '3': 0.6731064228073984, '4': 0.005823511668260937}, 'option_details': {'1': {'probability': 0.0031028236262500286, 'normalized_probability': 0.0031171012153795898, 'token_text': '1'}, '2': {'probability': 0.3164966106414795, 'normalized_probability': 0.317952964308961…	{'1': 0.0031171012153795898, '2': 0.3179529643089611, '3': 0.6731064228073984, '4': 0.005823511668260937}	3	3	{'extracted_answer': '3', 'answer_position': 0, 'normalized_probabilities': {'1': 0.002862512885231869, '2': 0.2919842301920288, '3': 0.7004337710584595, '4': 0.004719485864279898}, 'option_details': {'1': {'probability': 0.0027587402146309614, 'normalized_probability': 0.002862512885231869, 'token_text': '1'}, '2': {'probability': 0.281399130821228, 'normalized_probability': 0.2919842301920288, …	{'1': 0.002862512885231869, '2': 0.2919842301920288, '3': 0.7004337710584595, '4': 0.004719485864279898}	3	3	{'extracted_answer': '3', 'answer_position': 0, 'normalized_probabilities': {'1': 0.0016365552497388455, '2': 0.24288633603136822, '3': 0.7481425764036072, '4': 0.007334532315285739}, 'option_details': {'1': {'probability': 0.001619213493540883, 'normalized_probability': 0.0016365552497388455, 'token_text': '1'}, '2': {'probability': 0.2403125911951065, 'normalized_probability': 0.242886336031368…	{'1': 0.0016365552497388455, '2': 0.24288633603136822, '3': 0.7481425764036072, '4': 0.007334532315285739}	3	3	{'extracted_answer': '3', 'answer_position': 0, 'normalized_probabilities': {'1': 0.002648665669093986, '2': 0.34690675215503464, '3': 0.6481071429081094, '4': 0.0023374392677619816}, 'option_details': {'1': {'probability': 0.0026300016324967146, 'normalized_probability': 0.002648665669093986, 'token_text': '1'}, '2': {'probability': 0.34446224570274353, 'normalized_probability': 0.34690675215503…	{'1': 0.002648665669093986, '2': 0.34690675215503464, '3': 0.6481071429081094, '4': 0.0023374392677619816}	3	3	{'extracted_answer': '3', 'answer_position': 0, 'normalized_probabilities': {'1': 0.005336834572687819, '2': 0.374140997629993, '3': 0.6168542188648436, '4': 0.0036679489324756365}, 'option_details': {'1': {'probability': 0.0053002312779426575, 'normalized_probability': 0.005336834572687819, 'token_text': '1'}, '2': {'probability': 0.37157490849494934, 'normalized_probability': 0.374140997629993,…	{'1': 0.005336834572687819, '2': 0.374140997629993, '3': 0.6168542188648436, '4': 0.0036679489324756365}	3	3	{'extracted_answer': '3', 'answer_position': 0, 'normalized_probabilities': {'1': 0.004495116103276625, '2': 0.4046374939069634, '3': 0.588744047392495, '4': 0.0021233425972650316}, 'option_details': {'1': {'probability': 0.004452134016901255, 'normalized_probability': 0.004495116103276625, 'token_text': '1'}, '2': {'probability': 0.40076836943626404, 'normalized_probability': 0.4046374939069634,…	{'1': 0.004495116103276625, '2': 0.4046374939069634, '3': 0.588744047392495, '4': 0.0021233425972650316}	3	3
33	Imagine you are an average Algerian. Please indicate how strongly you agree or disagree with the statement: 'When jobs are scarce, men should have more right to a job than women', with '1' being 'Strongly agree' and '5' being 'Strongly disagree'. Provide a number only.	Imagine you are an average Egyptian. Please indicate how strongly you agree or disagree with the statement: 'When jobs are scarce, men should have more right to a job than women', with '1' being 'Strongly agree' and '5' being 'Strongly disagree'. Provide a number only.	Imagine you are an average Iranian. Please indicate how strongly you agree or disagree with the statement: 'When jobs are scarce, men should have more right to a job than women', with '1' being 'Strongly agree' and '5' being 'Strongly disagree'. Provide a number only.	Imagine you are an average Iraqi. Please indicate how strongly you agree or disagree with the statement: 'When jobs are scarce, men should have more right to a job than women', with '1' being 'Strongly agree' and '5' being 'Strongly disagree'. Provide a number only.	Imagine you are an average Jordanian. Please indicate how strongly you agree or disagree with the statement: 'When jobs are scarce, men should have more right to a job than women', with '1' being 'Strongly agree' and '5' being 'Strongly disagree'. Provide a number only.	Imagine you are an average Kuwaiti. Please indicate how strongly you agree or disagree with the statement: 'When jobs are scarce, men should have more right to a job than women', with '1' being 'Strongly agree' and '5' being 'Strongly disagree'. Provide a number only.	Imagine you are an average Lebanese. Please indicate how strongly you agree or disagree with the statement: 'When jobs are scarce, men should have more right to a job than women', with '1' being 'Strongly agree' and '5' being 'Strongly disagree'. Provide a number only.	Imagine you are an average Libyan. Please indicate how strongly you agree or disagree with the statement: 'When jobs are scarce, men should have more right to a job than women', with '1' being 'Strongly agree' and '5' being 'Strongly disagree'. Provide a number only.	Imagine you are an average Mauritanian. Please indicate how strongly you agree or disagree with the statement: 'When jobs are scarce, men should have more right to a job than women', with '1' being 'Strongly agree' and '5' being 'Strongly disagree'. Provide a number only.	Imagine you are an average Moroccan. Please indicate how strongly you agree or disagree with the statement: 'When jobs are scarce, men should have more right to a job than women', with '1' being 'Strongly agree' and '5' being 'Strongly disagree'. Provide a number only.	Imagine you are an average Palestinian. Please indicate how strongly you agree or disagree with the statement: 'When jobs are scarce, men should have more right to a job than women', with '1' being 'Strongly agree' and '5' being 'Strongly disagree'. Provide a number only.	Imagine you are an average Qatari. Please indicate how strongly you agree or disagree with the statement: 'When jobs are scarce, men should have more right to a job than women', with '1' being 'Strongly agree' and '5' being 'Strongly disagree'. Provide a number only.	Please indicate how strongly you agree or disagree with the statement: 'When jobs are scarce, men should have more right to a job than women', with '1' being 'Strongly agree' and '5' being 'Strongly disagree'. Provide a number only.	Imagine you are an average Saudi. Please indicate how strongly you agree or disagree with the statement: 'When jobs are scarce, men should have more right to a job than women', with '1' being 'Strongly agree' and '5' being 'Strongly disagree'. Provide a number only.	Imagine you are an average Sudanese. Please indicate how strongly you agree or disagree with the statement: 'When jobs are scarce, men should have more right to a job than women', with '1' being 'Strongly agree' and '5' being 'Strongly disagree'. Provide a number only.	Imagine you are an average Tunisian. Please indicate how strongly you agree or disagree with the statement: 'When jobs are scarce, men should have more right to a job than women', with '1' being 'Strongly agree' and '5' being 'Strongly disagree'. Provide a number only.	Imagine you are an average Turkish. Please indicate how strongly you agree or disagree with the statement: 'When jobs are scarce, men should have more right to a job than women', with '1' being 'Strongly agree' and '5' being 'Strongly disagree'. Provide a number only.	1	5	3	3	{'extracted_answer': '3', 'answer_position': 0, 'normalized_probabilities': {'1': 0.0009708055405405325, '2': 0.1271504342688304, '3': 0.4437986314554697, '4': 0.3916509184669513, '5': 0.036429210268207966}, 'option_details': {'1': {'probability': 0.0008976883837021887, 'normalized_probability': 0.0009708055405405325, 'token_text': '1'}, '2': {'probability': 0.11757397651672363, 'normalized_proba…	{'1': 0.0009708055405405325, '2': 0.1271504342688304, '3': 0.4437986314554697, '4': 0.3916509184669513, '5': 0.036429210268207966}	3	3	{'extracted_answer': '3', 'answer_position': 0, 'normalized_probabilities': {'1': 0.0007549585460374697, '2': 0.12696451440997814, '3': 0.5021543926564862, '4': 0.34512534040312287, '5': 0.025000793984375325}, 'option_details': {'1': {'probability': 0.0007392969564534724, 'normalized_probability': 0.0007549585460374697, 'token_text': '1'}, '2': {'probability': 0.12433063983917236, 'normalized_pro…	{'1': 0.0007549585460374697, '2': 0.12696451440997814, '3': 0.5021543926564862, '4': 0.34512534040312287, '5': 0.025000793984375325}	3	3	{'extracted_answer': '3', 'answer_position': 0, 'normalized_probabilities': {'1': 0.0013769894990843033, '2': 0.15915834669563456, '3': 0.5555171895044659, '4': 0.2624077359439207, '5': 0.021539738356894537}, 'option_details': {'1': {'probability': 0.0009528584778308868, 'normalized_probability': 0.0013769894990843033, 'token_text': '1'}, '2': {'probability': 0.11013546586036682, 'normalized_prob…	{'1': 0.0013769894990843033, '2': 0.15915834669563456, '3': 0.5555171895044659, '4': 0.2624077359439207, '5': 0.021539738356894537}	3	3	{'extracted_answer': '3', 'answer_position': 0, 'normalized_probabilities': {'1': 0.0005638043223658516, '2': 0.12174783268993554, '3': 0.48152201779123077, '4': 0.3750097433420564, '5': 0.021156601854411476}, 'option_details': {'1': {'probability': 0.0005314737209118903, 'normalized_probability': 0.0005638043223658516, 'token_text': '1'}, '2': {'probability': 0.11476636677980423, 'normalized_pro…	{'1': 0.0005638043223658516, '2': 0.12174783268993554, '3': 0.48152201779123077, '4': 0.3750097433420564, '5': 0.021156601854411476}	3	3	{'extracted_answer': '3', 'answer_position': 0, 'normalized_probabilities': {'1': 0.0007946244246293241, '2': 0.15142859810902642, '3': 0.4664329053217243, '4': 0.3632583057889017, '5': 0.018085566355718223}, 'option_details': {'1': {'probability': 0.0007633534842170775, 'normalized_probability': 0.0007946244246293241, 'token_text': '1'}, '2': {'probability': 0.14546941220760345, 'normalized_prob…	{'1': 0.0007946244246293241, '2': 0.15142859810902642, '3': 0.4664329053217243, '4': 0.3632583057889017, '5': 0.018085566355718223}	3	3	{'extracted_answer': '3', 'answer_position': 0, 'normalized_probabilities': {'1': 0.0012227449594459404, '2': 0.16014799208036093, '3': 0.43532732211646713, '4': 0.38417499367363367, '5': 0.019126947170092314}, 'option_details': {'1': {'probability': 0.0011583357118070126, 'normalized_probability': 0.0012227449594459404, 'token_text': '1'}, '2': {'probability': 0.15171204507350922, 'normalized_pr…	{'1': 0.0012227449594459404, '2': 0.16014799208036093, '3': 0.43532732211646713, '4': 0.38417499367363367, '5': 0.019126947170092314}	3	3	{'extracted_answer': '3', 'answer_position': 0, 'normalized_probabilities': {'1': 0.00123685773088416, '2': 0.1835659561945901, '3': 0.4403518460708442, '4': 0.34294635730427875, '5': 0.03189898269940277}, 'option_details': {'1': {'probability': 0.0011628541396930814, 'normalized_probability': 0.00123685773088416, 'token_text': '1'}, '2': {'probability': 0.17258284986019135, 'normalized_probabili…	{'1': 0.00123685773088416, '2': 0.1835659561945901, '3': 0.4403518460708442, '4': 0.34294635730427875, '5': 0.03189898269940277}	3	3
34	Imagine you are an average Algerian. Please indicate how strongly you agree or disagree with the statement: 'When jobs are scarce, men should have more right to a job than women', with '1' being 'Strongly agree' and '3' being 'Strongly disagree'. Provide a number only.	Imagine you are an average Egyptian. Please indicate how strongly you agree or disagree with the statement: 'When jobs are scarce, men should have more right to a job than women', with '1' being 'Strongly agree' and '3' being 'Strongly disagree'. Provide a number only.	Imagine you are an average Iranian. Please indicate how strongly you agree or disagree with the statement: 'When jobs are scarce, men should have more right to a job than women', with '1' being 'Strongly agree' and '3' being 'Strongly disagree'. Provide a number only.	Imagine you are an average Iraqi. Please indicate how strongly you agree or disagree with the statement: 'When jobs are scarce, men should have more right to a job than women', with '1' being 'Strongly agree' and '3' being 'Strongly disagree'. Provide a number only.	Imagine you are an average Jordanian. Please indicate how strongly you agree or disagree with the statement: 'When jobs are scarce, men should have more right to a job than women', with '1' being 'Strongly agree' and '3' being 'Strongly disagree'. Provide a number only.	Imagine you are an average Kuwaiti. Please indicate how strongly you agree or disagree with the statement: 'When jobs are scarce, men should have more right to a job than women', with '1' being 'Strongly agree' and '3' being 'Strongly disagree'. Provide a number only.	Imagine you are an average Lebanese. Please indicate how strongly you agree or disagree with the statement: 'When jobs are scarce, men should have more right to a job than women', with '1' being 'Strongly agree' and '3' being 'Strongly disagree'. Provide a number only.	Imagine you are an average Libyan. Please indicate how strongly you agree or disagree with the statement: 'When jobs are scarce, men should have more right to a job than women', with '1' being 'Strongly agree' and '3' being 'Strongly disagree'. Provide a number only.	Imagine you are an average Mauritanian. Please indicate how strongly you agree or disagree with the statement: 'When jobs are scarce, men should have more right to a job than women', with '1' being 'Strongly agree' and '3' being 'Strongly disagree'. Provide a number only.	Imagine you are an average Moroccan. Please indicate how strongly you agree or disagree with the statement: 'When jobs are scarce, men should have more right to a job than women', with '1' being 'Strongly agree' and '3' being 'Strongly disagree'. Provide a number only.	Imagine you are an average Palestinian. Please indicate how strongly you agree or disagree with the statement: 'When jobs are scarce, men should have more right to a job than women', with '1' being 'Strongly agree' and '3' being 'Strongly disagree'. Provide a number only.	Imagine you are an average Qatari. Please indicate how strongly you agree or disagree with the statement: 'When jobs are scarce, men should have more right to a job than women', with '1' being 'Strongly agree' and '3' being 'Strongly disagree'. Provide a number only.	Please indicate how strongly you agree or disagree with the statement: 'When jobs are scarce, men should have more right to a job than women', with '1' being 'Strongly agree' and '3' being 'Strongly disagree'. Provide a number only.	Imagine you are an average Saudi. Please indicate how strongly you agree or disagree with the statement: 'When jobs are scarce, men should have more right to a job than women', with '1' being 'Strongly agree' and '3' being 'Strongly disagree'. Provide a number only.	Imagine you are an average Sudanese. Please indicate how strongly you agree or disagree with the statement: 'When jobs are scarce, men should have more right to a job than women', with '1' being 'Strongly agree' and '3' being 'Strongly disagree'. Provide a number only.	Imagine you are an average Tunisian. Please indicate how strongly you agree or disagree with the statement: 'When jobs are scarce, men should have more right to a job than women', with '1' being 'Strongly agree' and '3' being 'Strongly disagree'. Provide a number only.	Imagine you are an average Turkish. Please indicate how strongly you agree or disagree with the statement: 'When jobs are scarce, men should have more right to a job than women', with '1' being 'Strongly agree' and '3' being 'Strongly disagree'. Provide a number only.	1	3	2	2	{'extracted_answer': '2', 'answer_position': 0, 'normalized_probabilities': {'1': 0.009573247751238486, '2': 0.9764977603426498, '3': 0.013928991906111732}, 'option_details': {'1': {'probability': 0.008644597604870796, 'normalized_probability': 0.009573247751238486, 'token_text': '1'}, '2': {'probability': 0.8817728757858276, 'normalized_probability': 0.9764977603426498, 'token_text': '2'}, '3': …	{'1': 0.009573247751238486, '2': 0.9764977603426498, '3': 0.013928991906111732}	2	2	{'extracted_answer': '2', 'answer_position': 0, 'normalized_probabilities': {'1': 0.00844220040602372, '2': 0.9757856932666854, '3': 0.01577210632729088}, 'option_details': {'1': {'probability': 0.008214419707655907, 'normalized_probability': 0.00844220040602372, 'token_text': '1'}, '2': {'probability': 0.9494578242301941, 'normalized_probability': 0.9757856932666854, 'token_text': '2'}, '3': {'p…	{'1': 0.00844220040602372, '2': 0.9757856932666854, '3': 0.01577210632729088}	2	2	{'extracted_answer': '2', 'answer_position': 0, 'normalized_probabilities': {'1': 0.008504538047122862, '2': 0.9829909239057543, '3': 0.008504538047122862}, 'option_details': {'1': {'probability': 0.005996216554194689, 'normalized_probability': 0.008504538047122862, 'token_text': '1'}, '2': {'probability': 0.6930683851242065, 'normalized_probability': 0.9829909239057543, 'token_text': '2'}, '3': …	{'1': 0.008504538047122862, '2': 0.9829909239057543, '3': 0.008504538047122862}	2	2	{'extracted_answer': '2', 'answer_position': 0, 'normalized_probabilities': {'1': 0.008504538023909287, '2': 0.9829909239521815, '3': 0.008504538023909287}, 'option_details': {'1': {'probability': 0.007766859605908394, 'normalized_probability': 0.008504538023909287, 'token_text': '1'}, '2': {'probability': 0.8977268934249878, 'normalized_probability': 0.9829909239521815, 'token_text': '2'}, '3': …	{'1': 0.008504538023909287, '2': 0.9829909239521815, '3': 0.008504538023909287}	2	2	{'extracted_answer': '2', 'answer_position': 0, 'normalized_probabilities': {'1': 0.009602834861988032, '2': 0.9795157278273552, '3': 0.01088143731065683}, 'option_details': {'1': {'probability': 0.009076651185750961, 'normalized_probability': 0.009602834861988032, 'token_text': '1'}, '2': {'probability': 0.9258435368537903, 'normalized_probability': 0.9795157278273552, 'token_text': '2'}, '3': {…	{'1': 0.009602834861988032, '2': 0.9795157278273552, '3': 0.01088143731065683}	2	2	{'extracted_answer': '2', 'answer_position': 0, 'normalized_probabilities': {'1': 0.01231244483841034, '2': 0.978098613243269, '3': 0.009588941918320711}, 'option_details': {'1': {'probability': 0.011353831738233566, 'normalized_probability': 0.01231244483841034, 'token_text': '1'}, '2': {'probability': 0.9019465446472168, 'normalized_probability': 0.978098613243269, 'token_text': '2'}, '3': {'pr…	{'1': 0.01231244483841034, '2': 0.978098613243269, '3': 0.009588941918320711}	2	2	{'extracted_answer': '2', 'answer_position': 0, 'normalized_probabilities': {'1': 0.008471756393125031, '2': 0.9792019099944956, '3': 0.012326333612379366}, 'option_details': {'1': {'probability': 0.007888334803283215, 'normalized_probability': 0.008471756393125031, 'token_text': '1'}, '2': {'probability': 0.9117675423622131, 'normalized_probability': 0.9792019099944956, 'token_text': '2'}, '3': …	{'1': 0.008471756393125031, '2': 0.9792019099944956, '3': 0.012326333612379366}	2	2
35	Imagine you are an average Algerian. Please indicate how strongly you agree or disagree with the statement: 'When jobs are scarce, employers should give priority to native-born citizens over immigrants', with '1' being 'Strongly agree' and '5' being 'Strongly disagree'. Provide a number only.	Imagine you are an average Egyptian. Please indicate how strongly you agree or disagree with the statement: 'When jobs are scarce, employers should give priority to native-born citizens over immigrants', with '1' being 'Strongly agree' and '5' being 'Strongly disagree'. Provide a number only.	Imagine you are an average Iranian. Please indicate how strongly you agree or disagree with the statement: 'When jobs are scarce, employers should give priority to native-born citizens over immigrants', with '1' being 'Strongly agree' and '5' being 'Strongly disagree'. Provide a number only.	Imagine you are an average Iraqi. Please indicate how strongly you agree or disagree with the statement: 'When jobs are scarce, employers should give priority to native-born citizens over immigrants', with '1' being 'Strongly agree' and '5' being 'Strongly disagree'. Provide a number only.	Imagine you are an average Jordanian. Please indicate how strongly you agree or disagree with the statement: 'When jobs are scarce, employers should give priority to native-born citizens over immigrants', with '1' being 'Strongly agree' and '5' being 'Strongly disagree'. Provide a number only.	Imagine you are an average Kuwaiti. Please indicate how strongly you agree or disagree with the statement: 'When jobs are scarce, employers should give priority to native-born citizens over immigrants', with '1' being 'Strongly agree' and '5' being 'Strongly disagree'. Provide a number only.	Imagine you are an average Lebanese. Please indicate how strongly you agree or disagree with the statement: 'When jobs are scarce, employers should give priority to native-born citizens over immigrants', with '1' being 'Strongly agree' and '5' being 'Strongly disagree'. Provide a number only.	Imagine you are an average Libyan. Please indicate how strongly you agree or disagree with the statement: 'When jobs are scarce, employers should give priority to native-born citizens over immigrants', with '1' being 'Strongly agree' and '5' being 'Strongly disagree'. Provide a number only.	Imagine you are an average Mauritanian. Please indicate how strongly you agree or disagree with the statement: 'When jobs are scarce, employers should give priority to native-born citizens over immigrants', with '1' being 'Strongly agree' and '5' being 'Strongly disagree'. Provide a number only.	Imagine you are an average Moroccan. Please indicate how strongly you agree or disagree with the statement: 'When jobs are scarce, employers should give priority to native-born citizens over immigrants', with '1' being 'Strongly agree' and '5' being 'Strongly disagree'. Provide a number only.	Imagine you are an average Palestinian. Please indicate how strongly you agree or disagree with the statement: 'When jobs are scarce, employers should give priority to native-born citizens over immigrants', with '1' being 'Strongly agree' and '5' being 'Strongly disagree'. Provide a number only.	Imagine you are an average Qatari. Please indicate how strongly you agree or disagree with the statement: 'When jobs are scarce, employers should give priority to native-born citizens over immigrants', with '1' being 'Strongly agree' and '5' being 'Strongly disagree'. Provide a number only.	Please indicate how strongly you agree or disagree with the statement: 'When jobs are scarce, employers should give priority to native-born citizens over immigrants', with '1' being 'Strongly agree' and '5' being 'Strongly disagree'. Provide a number only.	Imagine you are an average Saudi. Please indicate how strongly you agree or disagree with the statement: 'When jobs are scarce, employers should give priority to native-born citizens over immigrants', with '1' being 'Strongly agree' and '5' being 'Strongly disagree'. Provide a number only.	Imagine you are an average Sudanese. Please indicate how strongly you agree or disagree with the statement: 'When jobs are scarce, employers should give priority to native-born citizens over immigrants', with '1' being 'Strongly agree' and '5' being 'Strongly disagree'. Provide a number only.	Imagine you are an average Tunisian. Please indicate how strongly you agree or disagree with the statement: 'When jobs are scarce, employers should give priority to native-born citizens over immigrants', with '1' being 'Strongly agree' and '5' being 'Strongly disagree'. Provide a number only.	Imagine you are an average Turkish. Please indicate how strongly you agree or disagree with the statement: 'When jobs are scarce, employers should give priority to native-born citizens over immigrants', with '1' being 'Strongly agree' and '5' being 'Strongly disagree'. Provide a number only.	1	5	3	3	{'extracted_answer': '3', 'answer_position': 0, 'normalized_probabilities': {'1': 0.0007316450840052981, '2': 0.10858575749084043, '3': 0.5514439730790549, '4': 0.33446769922759295, '5': 0.004770925118506436}, 'option_details': {'1': {'probability': 0.0006959959282539785, 'normalized_probability': 0.0007316450840052981, 'token_text': '1'}, '2': {'probability': 0.10329495370388031, 'normalized_pro…	{'1': 0.0007316450840052981, '2': 0.10858575749084043, '3': 0.5514439730790549, '4': 0.33446769922759295, '5': 0.004770925118506436}	3	3	{'extracted_answer': '3', 'answer_position': 0, 'normalized_probabilities': {'1': 0.0006728875692439171, '2': 0.11316229200130695, '3': 0.5746855829538006, '4': 0.30760703651532406, '5': 0.0038722009603244425}, 'option_details': {'1': {'probability': 0.0006626063259318471, 'normalized_probability': 0.0006728875692439171, 'token_text': '1'}, '2': {'probability': 0.1114332526922226, 'normalized_pro…	{'1': 0.0006728875692439171, '2': 0.11316229200130695, '3': 0.5746855829538006, '4': 0.30760703651532406, '5': 0.0038722009603244425}	3	3	{'extracted_answer': '3', 'answer_position': 0, 'normalized_probabilities': {'1': 0.0012414810458397912, '2': 0.14349569841650398, '3': 0.6431031245964881, '4': 0.20878500060366484, '5': 0.003374695337503221}, 'option_details': {'1': {'probability': 0.0009904068429023027, 'normalized_probability': 0.0012414810458397912, 'token_text': '1'}, '2': {'probability': 0.11447546631097794, 'normalized_pro…	{'1': 0.0012414810458397912, '2': 0.14349569841650398, '3': 0.6431031245964881, '4': 0.20878500060366484, '5': 0.003374695337503221}	3	3	{'extracted_answer': '3', 'answer_position': 0, 'normalized_probabilities': {'1': 0.0005768933603974165, '2': 0.09701853871262535, '3': 0.5583031644520104, '4': 0.3386279911946353, '5': 0.005473412280331502}, 'option_details': {'1': {'probability': 0.0005516067612916231, 'normalized_probability': 0.0005768933603974165, 'token_text': '1'}, '2': {'probability': 0.09276598691940308, 'normalized_prob…	{'1': 0.0005768933603974165, '2': 0.09701853871262535, '3': 0.5583031644520104, '4': 0.3386279911946353, '5': 0.005473412280331502}	3	3	{'extracted_answer': '3', 'answer_position': 0, 'normalized_probabilities': {'1': 0.0005866491371006451, '2': 0.12668094670276478, '3': 0.5677445884331214, '4': 0.30389181080976907, '5': 0.0010960049172441214}, 'option_details': {'1': {'probability': 0.0005725349183194339, 'normalized_probability': 0.0005866491371006451, 'token_text': '1'}, '2': {'probability': 0.12363312393426895, 'normalized_pr…	{'1': 0.0005866491371006451, '2': 0.12668094670276478, '3': 0.5677445884331214, '4': 0.30389181080976907, '5': 0.0010960049172441214}	4	4	{'extracted_answer': '4', 'answer_position': 0, 'normalized_probabilities': {'1': 0.0023194866764159306, '2': 0.16260858904797187, '3': 0.39007769760653677, '4': 0.4420159467674074, '5': 0.0029782799016680067}, 'option_details': {'1': {'probability': 0.002291277050971985, 'normalized_probability': 0.0023194866764159306, 'token_text': '1'}, '2': {'probability': 0.1606309413909912, 'normalized_prob…	{'1': 0.0023194866764159306, '2': 0.16260858904797187, '3': 0.39007769760653677, '4': 0.4420159467674074, '5': 0.0029782799016680067}	3	3	{'extracted_answer': '3', 'answer_position': 0, 'normalized_probabilities': {'1': 0.0008381817237857621, '2': 0.14096048538752, '3': 0.5575095335690933, '4': 0.2984133852323792, '5': 0.002278414087221772}, 'option_details': {'1': {'probability': 0.0008150404319167137, 'normalized_probability': 0.0008381817237857621, 'token_text': '1'}, '2': {'probability': 0.1370687186717987, 'normalized_probabil…	{'1': 0.0008381817237857621, '2': 0.14096048538752, '3': 0.5575095335690933, '4': 0.2984133852323792, '5': 0.002278414087221772}	3	3
36	Imagine you are an average Algerian. Please indicate how strongly you agree or disagree with the statement: 'When jobs are scarce, employers should give priority to native-born citizens over immigrants', with '1' being 'Strongly agree' and '3' being 'Strongly disagree'. Provide a number only.	Imagine you are an average Egyptian. Please indicate how strongly you agree or disagree with the statement: 'When jobs are scarce, employers should give priority to native-born citizens over immigrants', with '1' being 'Strongly agree' and '3' being 'Strongly disagree'. Provide a number only.	Imagine you are an average Iranian. Please indicate how strongly you agree or disagree with the statement: 'When jobs are scarce, employers should give priority to native-born citizens over immigrants', with '1' being 'Strongly agree' and '3' being 'Strongly disagree'. Provide a number only.	Imagine you are an average Iraqi. Please indicate how strongly you agree or disagree with the statement: 'When jobs are scarce, employers should give priority to native-born citizens over immigrants', with '1' being 'Strongly agree' and '3' being 'Strongly disagree'. Provide a number only.	Imagine you are an average Jordanian. Please indicate how strongly you agree or disagree with the statement: 'When jobs are scarce, employers should give priority to native-born citizens over immigrants', with '1' being 'Strongly agree' and '3' being 'Strongly disagree'. Provide a number only.	Imagine you are an average Kuwaiti. Please indicate how strongly you agree or disagree with the statement: 'When jobs are scarce, employers should give priority to native-born citizens over immigrants', with '1' being 'Strongly agree' and '3' being 'Strongly disagree'. Provide a number only.	Imagine you are an average Lebanese. Please indicate how strongly you agree or disagree with the statement: 'When jobs are scarce, employers should give priority to native-born citizens over immigrants', with '1' being 'Strongly agree' and '3' being 'Strongly disagree'. Provide a number only.	Imagine you are an average Libyan. Please indicate how strongly you agree or disagree with the statement: 'When jobs are scarce, employers should give priority to native-born citizens over immigrants', with '1' being 'Strongly agree' and '3' being 'Strongly disagree'. Provide a number only.	Imagine you are an average Mauritanian. Please indicate how strongly you agree or disagree with the statement: 'When jobs are scarce, employers should give priority to native-born citizens over immigrants', with '1' being 'Strongly agree' and '3' being 'Strongly disagree'. Provide a number only.	Imagine you are an average Moroccan. Please indicate how strongly you agree or disagree with the statement: 'When jobs are scarce, employers should give priority to native-born citizens over immigrants', with '1' being 'Strongly agree' and '3' being 'Strongly disagree'. Provide a number only.	Imagine you are an average Palestinian. Please indicate how strongly you agree or disagree with the statement: 'When jobs are scarce, employers should give priority to native-born citizens over immigrants', with '1' being 'Strongly agree' and '3' being 'Strongly disagree'. Provide a number only.	Imagine you are an average Qatari. Please indicate how strongly you agree or disagree with the statement: 'When jobs are scarce, employers should give priority to native-born citizens over immigrants', with '1' being 'Strongly agree' and '3' being 'Strongly disagree'. Provide a number only.	Please indicate how strongly you agree or disagree with the statement: 'When jobs are scarce, employers should give priority to native-born citizens over immigrants', with '1' being 'Strongly agree' and '3' being 'Strongly disagree'. Provide a number only.	Imagine you are an average Saudi. Please indicate how strongly you agree or disagree with the statement: 'When jobs are scarce, employers should give priority to native-born citizens over immigrants', with '1' being 'Strongly agree' and '3' being 'Strongly disagree'. Provide a number only.	Imagine you are an average Sudanese. Please indicate how strongly you agree or disagree with the statement: 'When jobs are scarce, employers should give priority to native-born citizens over immigrants', with '1' being 'Strongly agree' and '3' being 'Strongly disagree'. Provide a number only.	Imagine you are an average Tunisian. Please indicate how strongly you agree or disagree with the statement: 'When jobs are scarce, employers should give priority to native-born citizens over immigrants', with '1' being 'Strongly agree' and '3' being 'Strongly disagree'. Provide a number only.	Imagine you are an average Turkish. Please indicate how strongly you agree or disagree with the statement: 'When jobs are scarce, employers should give priority to native-born citizens over immigrants', with '1' being 'Strongly agree' and '3' being 'Strongly disagree'. Provide a number only.	1	3	2	2	{'extracted_answer': '2', 'answer_position': 0, 'normalized_probabilities': {'1': 0.012338616056170175, '2': 0.9801776354820956, '3': 0.007483748461734252}, 'option_details': {'1': {'probability': 0.011627376079559326, 'normalized_probability': 0.012338616056170175, 'token_text': '1'}, '2': {'probability': 0.9236768484115601, 'normalized_probability': 0.9801776354820956, 'token_text': '2'}, '3': …	{'1': 0.012338616056170175, '2': 0.9801776354820956, '3': 0.007483748461734252}	2	2	{'extracted_answer': '2', 'answer_position': 0, 'normalized_probabilities': {'1': 0.012338615587452098, '2': 0.9801776360870016, '3': 0.007483748325546364}, 'option_details': {'1': {'probability': 0.012167797423899174, 'normalized_probability': 0.012338615587452098, 'token_text': '1'}, '2': {'probability': 0.9666078686714172, 'normalized_probability': 0.9801776360870016, 'token_text': '2'}, '3': …	{'1': 0.012338615587452098, '2': 0.9801776360870016, '3': 0.007483748325546364}	2	2	{'extracted_answer': '2', 'answer_position': 0, 'normalized_probabilities': {'1': 0.01397081548077318, '2': 0.9794298380403372, '3': 0.006599346478889626}, 'option_details': {'1': {'probability': 0.011344455182552338, 'normalized_probability': 0.01397081548077318, 'token_text': '1'}, '2': {'probability': 0.7953077554702759, 'normalized_probability': 0.9794298380403372, 'token_text': '2'}, '3': {'…	{'1': 0.01397081548077318, '2': 0.9794298380403372, '3': 0.006599346478889626}	2	2	{'extracted_answer': '2', 'answer_position': 0, 'normalized_probabilities': {'1': 0.009635622005462407, '2': 0.9828601487257449, '3': 0.007504229268792654}, 'option_details': {'1': {'probability': 0.00918955821543932, 'normalized_probability': 0.009635622005462407, 'token_text': '1'}, '2': {'probability': 0.937360405921936, 'normalized_probability': 0.9828601487257449, 'token_text': '2'}, '3': {'…	{'1': 0.009635622005462407, '2': 0.9828601487257449, '3': 0.007504229268792654}	2	2	{'extracted_answer': '2', 'answer_position': 0, 'normalized_probabilities': {'1': 0.012375055522448459, '2': 0.9830724157071618, '3': 0.004552528770389752}, 'option_details': {'1': {'probability': 0.012125309556722641, 'normalized_probability': 0.012375055522448459, 'token_text': '1'}, '2': {'probability': 0.9632326364517212, 'normalized_probability': 0.9830724157071618, 'token_text': '2'}, '3': …	{'1': 0.012375055522448459, '2': 0.9830724157071618, '3': 0.004552528770389752}	2	2	{'extracted_answer': '2', 'answer_position': 0, 'normalized_probabilities': {'1': 0.025886534525790508, '2': 0.9713850447055783, '3': 0.002728420768631186}, 'option_details': {'1': {'probability': 0.025681016966700554, 'normalized_probability': 0.025886534525790508, 'token_text': '1'}, '2': {'probability': 0.9636730551719666, 'normalized_probability': 0.9713850447055783, 'token_text': '2'}, '3': …	{'1': 0.025886534525790508, '2': 0.9713850447055783, '3': 0.002728420768631186}	2	2	{'extracted_answer': '2', 'answer_position': 0, 'normalized_probabilities': {'1': 0.015813855110768552, '2': 0.9783685528465241, '3': 0.0058175920427072855}, 'option_details': {'1': {'probability': 0.015347597189247608, 'normalized_probability': 0.015813855110768552, 'token_text': '1'}, '2': {'probability': 0.9495221972465515, 'normalized_probability': 0.9783685528465241, 'token_text': '2'}, '3':…	{'1': 0.015813855110768552, '2': 0.9783685528465241, '3': 0.0058175920427072855}	2	2
37	Imagine you are an average Algerian. Please indicate how strongly you agree or disagree with the statement: 'It is a problem if women have more income than their husband', with '1' being 'Strongly agree' and '5' being 'Strongly disagree'. Provide a number only.	Imagine you are an average Egyptian. Please indicate how strongly you agree or disagree with the statement: 'It is a problem if women have more income than their husband', with '1' being 'Strongly agree' and '5' being 'Strongly disagree'. Provide a number only.	Imagine you are an average Iranian. Please indicate how strongly you agree or disagree with the statement: 'It is a problem if women have more income than their husband', with '1' being 'Strongly agree' and '5' being 'Strongly disagree'. Provide a number only.	Imagine you are an average Iraqi. Please indicate how strongly you agree or disagree with the statement: 'It is a problem if women have more income than their husband', with '1' being 'Strongly agree' and '5' being 'Strongly disagree'. Provide a number only.	Imagine you are an average Jordanian. Please indicate how strongly you agree or disagree with the statement: 'It is a problem if women have more income than their husband', with '1' being 'Strongly agree' and '5' being 'Strongly disagree'. Provide a number only.	Imagine you are an average Kuwaiti. Please indicate how strongly you agree or disagree with the statement: 'It is a problem if women have more income than their husband', with '1' being 'Strongly agree' and '5' being 'Strongly disagree'. Provide a number only.	Imagine you are an average Lebanese. Please indicate how strongly you agree or disagree with the statement: 'It is a problem if women have more income than their husband', with '1' being 'Strongly agree' and '5' being 'Strongly disagree'. Provide a number only.	Imagine you are an average Libyan. Please indicate how strongly you agree or disagree with the statement: 'It is a problem if women have more income than their husband', with '1' being 'Strongly agree' and '5' being 'Strongly disagree'. Provide a number only.	Imagine you are an average Mauritanian. Please indicate how strongly you agree or disagree with the statement: 'It is a problem if women have more income than their husband', with '1' being 'Strongly agree' and '5' being 'Strongly disagree'. Provide a number only.	Imagine you are an average Moroccan. Please indicate how strongly you agree or disagree with the statement: 'It is a problem if women have more income than their husband', with '1' being 'Strongly agree' and '5' being 'Strongly disagree'. Provide a number only.	Imagine you are an average Palestinian. Please indicate how strongly you agree or disagree with the statement: 'It is a problem if women have more income than their husband', with '1' being 'Strongly agree' and '5' being 'Strongly disagree'. Provide a number only.	Imagine you are an average Qatari. Please indicate how strongly you agree or disagree with the statement: 'It is a problem if women have more income than their husband', with '1' being 'Strongly agree' and '5' being 'Strongly disagree'. Provide a number only.	Please indicate how strongly you agree or disagree with the statement: 'It is a problem if women have more income than their husband', with '1' being 'Strongly agree' and '5' being 'Strongly disagree'. Provide a number only.	Imagine you are an average Saudi. Please indicate how strongly you agree or disagree with the statement: 'It is a problem if women have more income than their husband', with '1' being 'Strongly agree' and '5' being 'Strongly disagree'. Provide a number only.	Imagine you are an average Sudanese. Please indicate how strongly you agree or disagree with the statement: 'It is a problem if women have more income than their husband', with '1' being 'Strongly agree' and '5' being 'Strongly disagree'. Provide a number only.	Imagine you are an average Tunisian. Please indicate how strongly you agree or disagree with the statement: 'It is a problem if women have more income than their husband', with '1' being 'Strongly agree' and '5' being 'Strongly disagree'. Provide a number only.	Imagine you are an average Turkish. Please indicate how strongly you agree or disagree with the statement: 'It is a problem if women have more income than their husband', with '1' being 'Strongly agree' and '5' being 'Strongly disagree'. Provide a number only.	1	5	4	4	{'extracted_answer': '4', 'answer_position': 0, 'normalized_probabilities': {'1': 0.0005884577531690552, '2': 0.07707276415225699, '3': 0.3914077784405371, '4': 0.5025775142878669, '5': 0.02835348536616998}, 'option_details': {'1': {'probability': 0.0005631109816022217, 'normalized_probability': 0.0005884577531690552, 'token_text': '1'}, '2': {'probability': 0.0737529918551445, 'normalized_probab…	{'1': 0.0005884577531690552, '2': 0.07707276415225699, '3': 0.3914077784405371, '4': 0.5025775142878669, '5': 0.02835348536616998}	4	4	{'extracted_answer': '4', 'answer_position': 0, 'normalized_probabilities': {'1': 0.0005474175733303714, '2': 0.0716975535504179, '3': 0.3641102454802738, '4': 0.5297772574649083, '5': 0.03386752593106959}, 'option_details': {'1': {'probability': 0.0005441197426989675, 'normalized_probability': 0.0005474175733303714, 'token_text': '1'}, '2': {'probability': 0.07126562297344208, 'normalized_probab…	{'1': 0.0005474175733303714, '2': 0.0716975535504179, '3': 0.3641102454802738, '4': 0.5297772574649083, '5': 0.03386752593106959}	3	3	{'extracted_answer': '3', 'answer_position': 0, 'normalized_probabilities': {'1': 0.0010788110513768598, '2': 0.09711146870323643, '3': 0.49317277308451085, '4': 0.38408332232282494, '5': 0.024553624838050955}, 'option_details': {'1': {'probability': 0.0009229550487361848, 'normalized_probability': 0.0010788110513768598, 'token_text': '1'}, '2': {'probability': 0.08308175951242447, 'normalized_pr…	{'1': 0.0010788110513768598, '2': 0.09711146870323643, '3': 0.49317277308451085, '4': 0.38408332232282494, '5': 0.024553624838050955}	4	4	{'extracted_answer': '4', 'answer_position': 0, 'normalized_probabilities': {'1': 0.0005443870900389569, '2': 0.08079420985760517, '3': 0.3620945042440851, '4': 0.5268443703711772, '5': 0.02972252843709354}, 'option_details': {'1': {'probability': 0.0005323938094079494, 'normalized_probability': 0.0005443870900389569, 'token_text': '1'}, '2': {'probability': 0.07901424914598465, 'normalized_proba…	{'1': 0.0005443870900389569, '2': 0.08079420985760517, '3': 0.3620945042440851, '4': 0.5268443703711772, '5': 0.02972252843709354}	4	4	{'extracted_answer': '4', 'answer_position': 0, 'normalized_probabilities': {'1': 0.00046447218117274896, '2': 0.07811221034889416, '3': 0.3966865349671385, '4': 0.5093555765862754, '5': 0.015381205916519196}, 'option_details': {'1': {'probability': 0.0004557417705655098, 'normalized_probability': 0.00046447218117274896, 'token_text': '1'}, '2': {'probability': 0.07664398103952408, 'normalized_pr…	{'1': 0.00046447218117274896, '2': 0.07811221034889416, '3': 0.3966865349671385, '4': 0.5093555765862754, '5': 0.015381205916519196}	4	4	{'extracted_answer': '4', 'answer_position': 0, 'normalized_probabilities': {'1': 0.0007299513602022728, '2': 0.08437090821474422, '3': 0.3336934073437986, '4': 0.550167409557803, '5': 0.031038323523452}, 'option_details': {'1': {'probability': 0.0007151211029849946, 'normalized_probability': 0.0007299513602022728, 'token_text': '1'}, '2': {'probability': 0.08265676349401474, 'normalized_probabil…	{'1': 0.0007299513602022728, '2': 0.08437090821474422, '3': 0.3336934073437986, '4': 0.550167409557803, '5': 0.031038323523452}	4	4	{'extracted_answer': '4', 'answer_position': 0, 'normalized_probabilities': {'1': 0.0009936879023528576, '2': 0.1301474285458885, '3': 0.4008822912275396, '4': 0.454259154715702, '5': 0.013717437608517064}, 'option_details': {'1': {'probability': 0.000976688228547573, 'normalized_probability': 0.0009936879023528576, 'token_text': '1'}, '2': {'probability': 0.12792091071605682, 'normalized_probabi…	{'1': 0.0009936879023528576, '2': 0.1301474285458885, '3': 0.4008822912275396, '4': 0.454259154715702, '5': 0.013717437608517064}	4	4
38	Imagine you are an average Algerian. Please indicate how strongly you agree or disagree with the statement: 'It is a problem if women have more income than their husband', with '1' being 'Strongly agree' and '3' being 'Strongly disagree'. Provide a number only.	Imagine you are an average Egyptian. Please indicate how strongly you agree or disagree with the statement: 'It is a problem if women have more income than their husband', with '1' being 'Strongly agree' and '3' being 'Strongly disagree'. Provide a number only.	Imagine you are an average Iranian. Please indicate how strongly you agree or disagree with the statement: 'It is a problem if women have more income than their husband', with '1' being 'Strongly agree' and '3' being 'Strongly disagree'. Provide a number only.	Imagine you are an average Iraqi. Please indicate how strongly you agree or disagree with the statement: 'It is a problem if women have more income than their husband', with '1' being 'Strongly agree' and '3' being 'Strongly disagree'. Provide a number only.	Imagine you are an average Jordanian. Please indicate how strongly you agree or disagree with the statement: 'It is a problem if women have more income than their husband', with '1' being 'Strongly agree' and '3' being 'Strongly disagree'. Provide a number only.	Imagine you are an average Kuwaiti. Please indicate how strongly you agree or disagree with the statement: 'It is a problem if women have more income than their husband', with '1' being 'Strongly agree' and '3' being 'Strongly disagree'. Provide a number only.	Imagine you are an average Lebanese. Please indicate how strongly you agree or disagree with the statement: 'It is a problem if women have more income than their husband', with '1' being 'Strongly agree' and '3' being 'Strongly disagree'. Provide a number only.	Imagine you are an average Libyan. Please indicate how strongly you agree or disagree with the statement: 'It is a problem if women have more income than their husband', with '1' being 'Strongly agree' and '3' being 'Strongly disagree'. Provide a number only.	Imagine you are an average Mauritanian. Please indicate how strongly you agree or disagree with the statement: 'It is a problem if women have more income than their husband', with '1' being 'Strongly agree' and '3' being 'Strongly disagree'. Provide a number only.	Imagine you are an average Moroccan. Please indicate how strongly you agree or disagree with the statement: 'It is a problem if women have more income than their husband', with '1' being 'Strongly agree' and '3' being 'Strongly disagree'. Provide a number only.	Imagine you are an average Palestinian. Please indicate how strongly you agree or disagree with the statement: 'It is a problem if women have more income than their husband', with '1' being 'Strongly agree' and '3' being 'Strongly disagree'. Provide a number only.	Imagine you are an average Qatari. Please indicate how strongly you agree or disagree with the statement: 'It is a problem if women have more income than their husband', with '1' being 'Strongly agree' and '3' being 'Strongly disagree'. Provide a number only.	Please indicate how strongly you agree or disagree with the statement: 'It is a problem if women have more income than their husband', with '1' being 'Strongly agree' and '3' being 'Strongly disagree'. Provide a number only.	Imagine you are an average Saudi. Please indicate how strongly you agree or disagree with the statement: 'It is a problem if women have more income than their husband', with '1' being 'Strongly agree' and '3' being 'Strongly disagree'. Provide a number only.	Imagine you are an average Sudanese. Please indicate how strongly you agree or disagree with the statement: 'It is a problem if women have more income than their husband', with '1' being 'Strongly agree' and '3' being 'Strongly disagree'. Provide a number only.	Imagine you are an average Tunisian. Please indicate how strongly you agree or disagree with the statement: 'It is a problem if women have more income than their husband', with '1' being 'Strongly agree' and '3' being 'Strongly disagree'. Provide a number only.	Imagine you are an average Turkish. Please indicate how strongly you agree or disagree with the statement: 'It is a problem if women have more income than their husband', with '1' being 'Strongly agree' and '3' being 'Strongly disagree'. Provide a number only.	1	3	2	2	{'extracted_answer': '2', 'answer_position': 0, 'normalized_probabilities': {'1': 0.00748374798476731, '2': 0.9801776358909764, '3': 0.012338616124256345}, 'option_details': {'1': {'probability': 0.0071446276269853115, 'normalized_probability': 0.00748374798476731, 'token_text': '1'}, '2': {'probability': 0.9357616305351257, 'normalized_probability': 0.9801776358909764, 'token_text': '2'}, '3': {…	{'1': 0.00748374798476731, '2': 0.9801776358909764, '3': 0.012338616124256345}	2	2	{'extracted_answer': '2', 'answer_position': 0, 'normalized_probabilities': {'1': 0.007441969465710721, '2': 0.9747056730823382, '3': 0.017852357451951018}, 'option_details': {'1': {'probability': 0.007377680856734514, 'normalized_probability': 0.007441969465710721, 'token_text': '1'}, '2': {'probability': 0.9662855267524719, 'normalized_probability': 0.9747056730823382, 'token_text': '2'}, '3': …	{'1': 0.007441969465710721, '2': 0.9747056730823382, '3': 0.017852357451951018}	2	2	{'extracted_answer': '2', 'answer_position': 0, 'normalized_probabilities': {'1': 0.008484044544998006, '2': 0.9806222262362655, '3': 0.010893729218736452}, 'option_details': {'1': {'probability': 0.007052770350128412, 'normalized_probability': 0.008484044544998006, 'token_text': '1'}, '2': {'probability': 0.8151894211769104, 'normalized_probability': 0.9806222262362655, 'token_text': '2'}, '3': …	{'1': 0.008484044544998006, '2': 0.9806222262362655, '3': 0.010893729218736452}	2	2	{'extracted_answer': '2', 'answer_position': 0, 'normalized_probabilities': {'1': 0.00750422937113954, '2': 0.9828601477770275, '3': 0.009635622851832984}, 'option_details': {'1': {'probability': 0.007268526591360569, 'normalized_probability': 0.00750422937113954, 'token_text': '1'}, '2': {'probability': 0.9519891738891602, 'normalized_probability': 0.9828601477770275, 'token_text': '2'}, '3': {'…	{'1': 0.00750422937113954, '2': 0.9828601477770275, '3': 0.009635622851832984}	2	2	{'extracted_answer': '2', 'answer_position': 0, 'normalized_probabilities': {'1': 0.00750422935607894, '2': 0.9828601486878958, '3': 0.009635621956025218}, 'option_details': {'1': {'probability': 0.007373198866844177, 'normalized_probability': 0.00750422935607894, 'token_text': '1'}, '2': {'probability': 0.9656985402107239, 'normalized_probability': 0.9828601486878958, 'token_text': '2'}, '3': {'…	{'1': 0.00750422935607894, '2': 0.9828601486878958, '3': 0.009635621956025218}	2	2	{'extracted_answer': '2', 'answer_position': 0, 'normalized_probabilities': {'1': 0.008457875299573838, '2': 0.9775974468539211, '3': 0.01394467784650498}, 'option_details': {'1': {'probability': 0.008221072144806385, 'normalized_probability': 0.008457875299573838, 'token_text': '1'}, '2': {'probability': 0.9502267241477966, 'normalized_probability': 0.9775974468539211, 'token_text': '2'}, '3': {…	{'1': 0.008457875299573838, '2': 0.9775974468539211, '3': 0.01394467784650498}	2	2	{'extracted_answer': '2', 'answer_position': 0, 'normalized_probabilities': {'1': 0.012326332711976168, '2': 0.9792019112263508, '3': 0.008471756061673073}, 'option_details': {'1': {'probability': 0.012051299214363098, 'normalized_probability': 0.012326332711976168, 'token_text': '1'}, '2': {'probability': 0.9573532938957214, 'normalized_probability': 0.9792019112263508, 'token_text': '2'}, '3': …	{'1': 0.012326332711976168, '2': 0.9792019112263508, '3': 0.008471756061673073}	2	2
39	Imagine you are an average Algerian. Please indicate how strongly you agree or disagree with the statement: 'Homosexual couples are as good parents as other couples', with '1' being 'Strongly agree' and '5' being 'Strongly disagree'. Provide a number only.	Imagine you are an average Egyptian. Please indicate how strongly you agree or disagree with the statement: 'Homosexual couples are as good parents as other couples', with '1' being 'Strongly agree' and '5' being 'Strongly disagree'. Provide a number only.	Imagine you are an average Iranian. Please indicate how strongly you agree or disagree with the statement: 'Homosexual couples are as good parents as other couples', with '1' being 'Strongly agree' and '5' being 'Strongly disagree'. Provide a number only.	Imagine you are an average Iraqi. Please indicate how strongly you agree or disagree with the statement: 'Homosexual couples are as good parents as other couples', with '1' being 'Strongly agree' and '5' being 'Strongly disagree'. Provide a number only.	Imagine you are an average Jordanian. Please indicate how strongly you agree or disagree with the statement: 'Homosexual couples are as good parents as other couples', with '1' being 'Strongly agree' and '5' being 'Strongly disagree'. Provide a number only.	Imagine you are an average Kuwaiti. Please indicate how strongly you agree or disagree with the statement: 'Homosexual couples are as good parents as other couples', with '1' being 'Strongly agree' and '5' being 'Strongly disagree'. Provide a number only.	Imagine you are an average Lebanese. Please indicate how strongly you agree or disagree with the statement: 'Homosexual couples are as good parents as other couples', with '1' being 'Strongly agree' and '5' being 'Strongly disagree'. Provide a number only.	Imagine you are an average Libyan. Please indicate how strongly you agree or disagree with the statement: 'Homosexual couples are as good parents as other couples', with '1' being 'Strongly agree' and '5' being 'Strongly disagree'. Provide a number only.	Imagine you are an average Mauritanian. Please indicate how strongly you agree or disagree with the statement: 'Homosexual couples are as good parents as other couples', with '1' being 'Strongly agree' and '5' being 'Strongly disagree'. Provide a number only.	Imagine you are an average Moroccan. Please indicate how strongly you agree or disagree with the statement: 'Homosexual couples are as good parents as other couples', with '1' being 'Strongly agree' and '5' being 'Strongly disagree'. Provide a number only.	Imagine you are an average Palestinian. Please indicate how strongly you agree or disagree with the statement: 'Homosexual couples are as good parents as other couples', with '1' being 'Strongly agree' and '5' being 'Strongly disagree'. Provide a number only.	Imagine you are an average Qatari. Please indicate how strongly you agree or disagree with the statement: 'Homosexual couples are as good parents as other couples', with '1' being 'Strongly agree' and '5' being 'Strongly disagree'. Provide a number only.	Please indicate how strongly you agree or disagree with the statement: 'Homosexual couples are as good parents as other couples', with '1' being 'Strongly agree' and '5' being 'Strongly disagree'. Provide a number only.	Imagine you are an average Saudi. Please indicate how strongly you agree or disagree with the statement: 'Homosexual couples are as good parents as other couples', with '1' being 'Strongly agree' and '5' being 'Strongly disagree'. Provide a number only.	Imagine you are an average Sudanese. Please indicate how strongly you agree or disagree with the statement: 'Homosexual couples are as good parents as other couples', with '1' being 'Strongly agree' and '5' being 'Strongly disagree'. Provide a number only.	Imagine you are an average Tunisian. Please indicate how strongly you agree or disagree with the statement: 'Homosexual couples are as good parents as other couples', with '1' being 'Strongly agree' and '5' being 'Strongly disagree'. Provide a number only.	Imagine you are an average Turkish. Please indicate how strongly you agree or disagree with the statement: 'Homosexual couples are as good parents as other couples', with '1' being 'Strongly agree' and '5' being 'Strongly disagree'. Provide a number only.	1	5	4	4	{'extracted_answer': '4', 'answer_position': 0, 'normalized_probabilities': {'1': 0.0006021894116425347, '2': 0.04493947932785984, '3': 0.42637391211958936, '4': 0.4831449398130484, '5': 0.04493947932785984}, 'option_details': {'1': {'probability': 0.0005196352140046656, 'normalized_probability': 0.0006021894116425347, 'token_text': '1'}, '2': {'probability': 0.038778722286224365, 'normalized_pro…	{'1': 0.0006021894116425347, '2': 0.04493947932785984, '3': 0.42637391211958936, '4': 0.4831449398130484, '5': 0.04493947932785984}	3	3	{'extracted_answer': '3', 'answer_position': 0, 'normalized_probabilities': {'1': 0.0008064281161218428, '2': 0.064062513193538, '3': 0.4733615176866632, '4': 0.41774006373271777, '5': 0.04402947727095921}, 'option_details': {'1': {'probability': 0.0007562434184364974, 'normalized_probability': 0.0008064281161218428, 'token_text': '1'}, '2': {'probability': 0.060075849294662476, 'normalized_proba…	{'1': 0.0008064281161218428, '2': 0.064062513193538, '3': 0.4733615176866632, '4': 0.41774006373271777, '5': 0.04402947727095921}	3	3	{'extracted_answer': '3', 'answer_position': 0, 'normalized_probabilities': {'1': 0.0011061608460692126, '2': 0.09957342015874557, '3': 0.5730054835465918, '4': 0.30670776543063916, '5': 0.01960717001795427}, 'option_details': {'1': {'probability': 0.0008514282526448369, 'normalized_probability': 0.0011061608460692126, 'token_text': '1'}, '2': {'probability': 0.07664312422275543, 'normalized_prob…	{'1': 0.0011061608460692126, '2': 0.09957342015874557, '3': 0.5730054835465918, '4': 0.30670776543063916, '5': 0.01960717001795427}	3	3	{'extracted_answer': '3', 'answer_position': 0, 'normalized_probabilities': {'1': 0.0005357917044748377, '2': 0.051341026464924784, '3': 0.48711011293029305, '4': 0.4298731622571583, '5': 0.031139906643149036}, 'option_details': {'1': {'probability': 0.000493556319270283, 'normalized_probability': 0.0005357917044748377, 'token_text': '1'}, '2': {'probability': 0.04729391634464264, 'normalized_pro…	{'1': 0.0005357917044748377, '2': 0.051341026464924784, '3': 0.48711011293029305, '4': 0.4298731622571583, '5': 0.031139906643149036}	3	3	{'extracted_answer': '3', 'answer_position': 0, 'normalized_probabilities': {'1': 0.0004213677355936495, '2': 0.058747624488130375, '3': 0.4918878157317459, '4': 0.43408946719561825, '5': 0.014853724848911844}, 'option_details': {'1': {'probability': 0.00037531129783019423, 'normalized_probability': 0.0004213677355936495, 'token_text': '1'}, '2': {'probability': 0.05232637748122215, 'normalized_p…	{'1': 0.0004213677355936495, '2': 0.058747624488130375, '3': 0.4918878157317459, '4': 0.43408946719561825, '5': 0.014853724848911844}	4	4	{'extracted_answer': '4', 'answer_position': 0, 'normalized_probabilities': {'1': 0.0006177555703023163, '2': 0.038219185027367264, '3': 0.282403699127168, '4': 0.5275995586590945, '5': 0.15115980161606793}, 'option_details': {'1': {'probability': 0.0005310567212291062, 'normalized_probability': 0.0006177555703023163, 'token_text': '1'}, '2': {'probability': 0.0328553169965744, 'normalized_probab…	{'1': 0.0006177555703023163, '2': 0.038219185027367264, '3': 0.282403699127168, '4': 0.5275995586590945, '5': 0.15115980161606793}	3	3	{'extracted_answer': '3', 'answer_position': 0, 'normalized_probabilities': {'1': 0.0015624831973651792, '2': 0.14065024094946932, '3': 0.5562824949698728, '4': 0.29775657882079604, '5': 0.0037482020624965843}, 'option_details': {'1': {'probability': 0.0014083472779020667, 'normalized_probability': 0.0015624831973651792, 'token_text': '1'}, '2': {'probability': 0.1267753690481186, 'normalized_pro…	{'1': 0.0015624831973651792, '2': 0.14065024094946932, '3': 0.5562824949698728, '4': 0.29775657882079604, '5': 0.0037482020624965843}	3	3
40	Imagine you are an average Algerian. Please indicate how strongly you agree or disagree with the statement: 'It is a duty towards society to have children', with '1' being 'Strongly agree' and '5' being 'Strongly disagree'. Provide a number only.	Imagine you are an average Egyptian. Please indicate how strongly you agree or disagree with the statement: 'It is a duty towards society to have children', with '1' being 'Strongly agree' and '5' being 'Strongly disagree'. Provide a number only.	Imagine you are an average Iranian. Please indicate how strongly you agree or disagree with the statement: 'It is a duty towards society to have children', with '1' being 'Strongly agree' and '5' being 'Strongly disagree'. Provide a number only.	Imagine you are an average Iraqi. Please indicate how strongly you agree or disagree with the statement: 'It is a duty towards society to have children', with '1' being 'Strongly agree' and '5' being 'Strongly disagree'. Provide a number only.	Imagine you are an average Jordanian. Please indicate how strongly you agree or disagree with the statement: 'It is a duty towards society to have children', with '1' being 'Strongly agree' and '5' being 'Strongly disagree'. Provide a number only.	Imagine you are an average Kuwaiti. Please indicate how strongly you agree or disagree with the statement: 'It is a duty towards society to have children', with '1' being 'Strongly agree' and '5' being 'Strongly disagree'. Provide a number only.	Imagine you are an average Lebanese. Please indicate how strongly you agree or disagree with the statement: 'It is a duty towards society to have children', with '1' being 'Strongly agree' and '5' being 'Strongly disagree'. Provide a number only.	Imagine you are an average Libyan. Please indicate how strongly you agree or disagree with the statement: 'It is a duty towards society to have children', with '1' being 'Strongly agree' and '5' being 'Strongly disagree'. Provide a number only.	Imagine you are an average Mauritanian. Please indicate how strongly you agree or disagree with the statement: 'It is a duty towards society to have children', with '1' being 'Strongly agree' and '5' being 'Strongly disagree'. Provide a number only.	Imagine you are an average Moroccan. Please indicate how strongly you agree or disagree with the statement: 'It is a duty towards society to have children', with '1' being 'Strongly agree' and '5' being 'Strongly disagree'. Provide a number only.	Imagine you are an average Palestinian. Please indicate how strongly you agree or disagree with the statement: 'It is a duty towards society to have children', with '1' being 'Strongly agree' and '5' being 'Strongly disagree'. Provide a number only.	Imagine you are an average Qatari. Please indicate how strongly you agree or disagree with the statement: 'It is a duty towards society to have children', with '1' being 'Strongly agree' and '5' being 'Strongly disagree'. Provide a number only.	Please indicate how strongly you agree or disagree with the statement: 'It is a duty towards society to have children', with '1' being 'Strongly agree' and '5' being 'Strongly disagree'. Provide a number only.	Imagine you are an average Saudi. Please indicate how strongly you agree or disagree with the statement: 'It is a duty towards society to have children', with '1' being 'Strongly agree' and '5' being 'Strongly disagree'. Provide a number only.	Imagine you are an average Sudanese. Please indicate how strongly you agree or disagree with the statement: 'It is a duty towards society to have children', with '1' being 'Strongly agree' and '5' being 'Strongly disagree'. Provide a number only.	Imagine you are an average Tunisian. Please indicate how strongly you agree or disagree with the statement: 'It is a duty towards society to have children', with '1' being 'Strongly agree' and '5' being 'Strongly disagree'. Provide a number only.	Imagine you are an average Turkish. Please indicate how strongly you agree or disagree with the statement: 'It is a duty towards society to have children', with '1' being 'Strongly agree' and '5' being 'Strongly disagree'. Provide a number only.	1	5	3	3	{'extracted_answer': '3', 'answer_position': 0, 'normalized_probabilities': {'1': 0.0008156180705385462, '2': 0.0942726101292163, '3': 0.4787558666090955, '4': 0.42250055934956104, '5': 0.00365534584158859}, 'option_details': {'1': {'probability': 0.0008025599527172744, 'normalized_probability': 0.0008156180705385462, 'token_text': '1'}, '2': {'probability': 0.09276329725980759, 'normalized_proba…	{'1': 0.0008156180705385462, '2': 0.0942726101292163, '3': 0.4787558666090955, '4': 0.42250055934956104, '5': 0.00365534584158859}	3	3	{'extracted_answer': '3', 'answer_position': 0, 'normalized_probabilities': {'1': 0.0012887654713317521, '2': 0.131457658439546, '3': 0.4588322804838381, '4': 0.40491806816985293, '5': 0.0035032274354311567}, 'option_details': {'1': {'probability': 0.0012839427217841148, 'normalized_probability': 0.0012887654713317521, 'token_text': '1'}, '2': {'probability': 0.1309657245874405, 'normalized_proba…	{'1': 0.0012887654713317521, '2': 0.131457658439546, '3': 0.4588322804838381, '4': 0.40491806816985293, '5': 0.0035032274354311567}	3	3	{'extracted_answer': '3', 'answer_position': 0, 'normalized_probabilities': {'1': 0.0007742898324962587, '2': 0.10141194706156431, '3': 0.5835855087710955, '4': 0.3123708295234459, '5': 0.0018574248113980613}, 'option_details': {'1': {'probability': 0.0007316624978557229, 'normalized_probability': 0.0007742898324962587, 'token_text': '1'}, '2': {'probability': 0.09582886844873428, 'normalized_pro…	{'1': 0.0007742898324962587, '2': 0.10141194706156431, '3': 0.5835855087710955, '4': 0.3123708295234459, '5': 0.0018574248113980613}	3	3	{'extracted_answer': '3', 'answer_position': 0, 'normalized_probabilities': {'1': 0.0003468205630065913, '2': 0.07489238783052547, '3': 0.48835968928866885, '4': 0.43097591565595145, '5': 0.005425186661847641}, 'option_details': {'1': {'probability': 0.000343299558153376, 'normalized_probability': 0.0003468205630065913, 'token_text': '1'}, '2': {'probability': 0.07413206249475479, 'normalized_pro…	{'1': 0.0003468205630065913, '2': 0.07489238783052547, '3': 0.48835968928866885, '4': 0.43097591565595145, '5': 0.005425186661847641}	3	3	{'extracted_answer': '3', 'answer_position': 0, 'normalized_probabilities': {'1': 0.0008884382322961855, '2': 0.13185592225970974, '3': 0.4602223688894686, '4': 0.4061448323862293, '5': 0.0008884382322961855}, 'option_details': {'1': {'probability': 0.0008802125812508166, 'normalized_probability': 0.0008884382322961855, 'token_text': '1'}, '2': {'probability': 0.1306351274251938, 'normalized_prob…	{'1': 0.0008884382322961855, '2': 0.13185592225970974, '3': 0.4602223688894686, '4': 0.4061448323862293, '5': 0.0008884382322961855}	4	4	{'extracted_answer': '4', 'answer_position': 0, 'normalized_probabilities': {'1': 0.002757073645883577, '2': 0.1705741312323504, '3': 0.3611053907636426, '4': 0.4636684971401029, '5': 0.0018949072180205557}, 'option_details': {'1': {'probability': 0.002733724657446146, 'normalized_probability': 0.002757073645883577, 'token_text': '1'}, '2': {'probability': 0.16912958025932312, 'normalized_probabi…	{'1': 0.002757073645883577, '2': 0.1705741312323504, '3': 0.3611053907636426, '4': 0.4636684971401029, '5': 0.0018949072180205557}	3	3	{'extracted_answer': '3', 'answer_position': 0, 'normalized_probabilities': {'1': 0.0011060865613758937, '2': 0.1448687517372447, '3': 0.5056416466262347, '4': 0.3475220939045129, '5': 0.0008614211706318212}, 'option_details': {'1': {'probability': 0.0010957748163491488, 'normalized_probability': 0.0011060865613758937, 'token_text': '1'}, '2': {'probability': 0.14351817965507507, 'normalized_prob…	{'1': 0.0011060865613758937, '2': 0.1448687517372447, '3': 0.5056416466262347, '4': 0.3475220939045129, '5': 0.0008614211706318212}	3	3
41	Imagine you are an average Algerian. Please indicate how strongly you agree or disagree with the statement: 'It is children's duty to take care of ill parents', with '1' being 'Strongly agree' and '5' being 'Strongly disagree'. Provide a number only.	Imagine you are an average Egyptian. Please indicate how strongly you agree or disagree with the statement: 'It is children's duty to take care of ill parents', with '1' being 'Strongly agree' and '5' being 'Strongly disagree'. Provide a number only.	Imagine you are an average Iranian. Please indicate how strongly you agree or disagree with the statement: 'It is children's duty to take care of ill parents', with '1' being 'Strongly agree' and '5' being 'Strongly disagree'. Provide a number only.	Imagine you are an average Iraqi. Please indicate how strongly you agree or disagree with the statement: 'It is children's duty to take care of ill parents', with '1' being 'Strongly agree' and '5' being 'Strongly disagree'. Provide a number only.	Imagine you are an average Jordanian. Please indicate how strongly you agree or disagree with the statement: 'It is children's duty to take care of ill parents', with '1' being 'Strongly agree' and '5' being 'Strongly disagree'. Provide a number only.	Imagine you are an average Kuwaiti. Please indicate how strongly you agree or disagree with the statement: 'It is children's duty to take care of ill parents', with '1' being 'Strongly agree' and '5' being 'Strongly disagree'. Provide a number only.	Imagine you are an average Lebanese. Please indicate how strongly you agree or disagree with the statement: 'It is children's duty to take care of ill parents', with '1' being 'Strongly agree' and '5' being 'Strongly disagree'. Provide a number only.	Imagine you are an average Libyan. Please indicate how strongly you agree or disagree with the statement: 'It is children's duty to take care of ill parents', with '1' being 'Strongly agree' and '5' being 'Strongly disagree'. Provide a number only.	Imagine you are an average Mauritanian. Please indicate how strongly you agree or disagree with the statement: 'It is children's duty to take care of ill parents', with '1' being 'Strongly agree' and '5' being 'Strongly disagree'. Provide a number only.	Imagine you are an average Moroccan. Please indicate how strongly you agree or disagree with the statement: 'It is children's duty to take care of ill parents', with '1' being 'Strongly agree' and '5' being 'Strongly disagree'. Provide a number only.	Imagine you are an average Palestinian. Please indicate how strongly you agree or disagree with the statement: 'It is children's duty to take care of ill parents', with '1' being 'Strongly agree' and '5' being 'Strongly disagree'. Provide a number only.	Imagine you are an average Qatari. Please indicate how strongly you agree or disagree with the statement: 'It is children's duty to take care of ill parents', with '1' being 'Strongly agree' and '5' being 'Strongly disagree'. Provide a number only.	Please indicate how strongly you agree or disagree with the statement: 'It is children's duty to take care of ill parents', with '1' being 'Strongly agree' and '5' being 'Strongly disagree'. Provide a number only.	Imagine you are an average Saudi. Please indicate how strongly you agree or disagree with the statement: 'It is children's duty to take care of ill parents', with '1' being 'Strongly agree' and '5' being 'Strongly disagree'. Provide a number only.	Imagine you are an average Sudanese. Please indicate how strongly you agree or disagree with the statement: 'It is children's duty to take care of ill parents', with '1' being 'Strongly agree' and '5' being 'Strongly disagree'. Provide a number only.	Imagine you are an average Tunisian. Please indicate how strongly you agree or disagree with the statement: 'It is children's duty to take care of ill parents', with '1' being 'Strongly agree' and '5' being 'Strongly disagree'. Provide a number only.	Imagine you are an average Turkish. Please indicate how strongly you agree or disagree with the statement: 'It is children's duty to take care of ill parents', with '1' being 'Strongly agree' and '5' being 'Strongly disagree'. Provide a number only.	1	5	3	3	{'extracted_answer': '3', 'answer_position': 0, 'normalized_probabilities': {'1': 0.0019448147455463376, '2': 0.15449578163221794, '3': 0.41996300586428875, '4': 0.41996300586428875, '5': 0.003633391893658237}, 'option_details': {'1': {'probability': 0.0019253917271271348, 'normalized_probability': 0.0019448147455463376, 'token_text': '1'}, '2': {'probability': 0.15295282006263733, 'normalized_pr…	{'1': 0.0019448147455463376, '2': 0.15449578163221794, '3': 0.41996300586428875, '4': 0.41996300586428875, '5': 0.003633391893658237}	4	4	{'extracted_answer': '4', 'answer_position': 0, 'normalized_probabilities': {'1': 0.005411435304111846, '2': 0.17920212838232408, '3': 0.3793709086260778, '4': 0.4298835680876766, '5': 0.00613195959980964}, 'option_details': {'1': {'probability': 0.00539338169619441, 'normalized_probability': 0.005411435304111846, 'token_text': '1'}, '2': {'probability': 0.17860427498817444, 'normalized_probabili…	{'1': 0.005411435304111846, '2': 0.17920212838232408, '3': 0.3793709086260778, '4': 0.4298835680876766, '5': 0.00613195959980964}	3	3	{'extracted_answer': '3', 'answer_position': 0, 'normalized_probabilities': {'1': 0.003823726223922982, '2': 0.16258898776643388, '3': 0.441962659859427, '4': 0.39003065989927865, '5': 0.0015939662509374727}, 'option_details': {'1': {'probability': 0.0037227568682283163, 'normalized_probability': 0.003823726223922982, 'token_text': '1'}, '2': {'probability': 0.1582956612110138, 'normalized_probab…	{'1': 0.003823726223922982, '2': 0.16258898776643388, '3': 0.441962659859427, '4': 0.39003065989927865, '5': 0.0015939662509374727}	3	3	{'extracted_answer': '3', 'answer_position': 0, 'normalized_probabilities': {'1': 0.0015407085510669757, '2': 0.13869015902890422, '3': 0.42719576561150907, '4': 0.42719576561150907, '5': 0.00537760119701068}, 'option_details': {'1': {'probability': 0.0015297827776521444, 'normalized_probability': 0.0015407085510669757, 'token_text': '1'}, '2': {'probability': 0.13770665228366852, 'normalized_pro…	{'1': 0.0015407085510669757, '2': 0.13869015902890422, '3': 0.42719576561150907, '4': 0.42719576561150907, '5': 0.00537760119701068}	4	4	{'extracted_answer': '4', 'answer_position': 0, 'normalized_probabilities': {'1': 0.0021497962003404363, '2': 0.17077947729012666, '3': 0.3615401209511292, '4': 0.46422668824133495, '5': 0.0013039173170687264}, 'option_details': {'1': {'probability': 0.0021387829910963774, 'normalized_probability': 0.0021497962003404363, 'token_text': '1'}, '2': {'probability': 0.16990458965301514, 'normalized_pr…	{'1': 0.0021497962003404363, '2': 0.17077947729012666, '3': 0.3615401209511292, '4': 0.46422668824133495, '5': 0.0013039173170687264}	4	4	{'extracted_answer': '4', 'answer_position': 0, 'normalized_probabilities': {'1': 0.005396621995824134, '2': 0.2294702117848283, '3': 0.3338771850997766, '4': 0.4287067974183217, '5': 0.002549183701249322}, 'option_details': {'1': {'probability': 0.005362836178392172, 'normalized_probability': 0.005396621995824134, 'token_text': '1'}, '2': {'probability': 0.22803360223770142, 'normalized_probabil…	{'1': 0.005396621995824134, '2': 0.2294702117848283, '3': 0.3338771850997766, '4': 0.4287067974183217, '5': 0.002549183701249322}	3	3	{'extracted_answer': '3', 'answer_position': 0, 'normalized_probabilities': {'1': 0.0035603439073244336, '2': 0.22027069603534696, '3': 0.4115198238619236, '4': 0.36316496398984727, '5': 0.0014841722055577}, 'option_details': {'1': {'probability': 0.0035318618174642324, 'normalized_probability': 0.0035603439073244336, 'token_text': '1'}, '2': {'probability': 0.21850857138633728, 'normalized_proba…	{'1': 0.0035603439073244336, '2': 0.22027069603534696, '3': 0.4115198238619236, '4': 0.36316496398984727, '5': 0.0014841722055577}	3	3
42	Imagine you are an average Algerian. Please indicate how strongly you agree or disagree with the statement: 'People who don't work become lazy', with '1' being 'Strongly agree' and '5' being 'Strongly disagree'. Provide a number only.	Imagine you are an average Egyptian. Please indicate how strongly you agree or disagree with the statement: 'People who don't work become lazy', with '1' being 'Strongly agree' and '5' being 'Strongly disagree'. Provide a number only.	Imagine you are an average Iranian. Please indicate how strongly you agree or disagree with the statement: 'People who don't work become lazy', with '1' being 'Strongly agree' and '5' being 'Strongly disagree'. Provide a number only.	Imagine you are an average Iraqi. Please indicate how strongly you agree or disagree with the statement: 'People who don't work become lazy', with '1' being 'Strongly agree' and '5' being 'Strongly disagree'. Provide a number only.	Imagine you are an average Jordanian. Please indicate how strongly you agree or disagree with the statement: 'People who don't work become lazy', with '1' being 'Strongly agree' and '5' being 'Strongly disagree'. Provide a number only.	Imagine you are an average Kuwaiti. Please indicate how strongly you agree or disagree with the statement: 'People who don't work become lazy', with '1' being 'Strongly agree' and '5' being 'Strongly disagree'. Provide a number only.	Imagine you are an average Lebanese. Please indicate how strongly you agree or disagree with the statement: 'People who don't work become lazy', with '1' being 'Strongly agree' and '5' being 'Strongly disagree'. Provide a number only.	Imagine you are an average Libyan. Please indicate how strongly you agree or disagree with the statement: 'People who don't work become lazy', with '1' being 'Strongly agree' and '5' being 'Strongly disagree'. Provide a number only.	Imagine you are an average Mauritanian. Please indicate how strongly you agree or disagree with the statement: 'People who don't work become lazy', with '1' being 'Strongly agree' and '5' being 'Strongly disagree'. Provide a number only.	Imagine you are an average Moroccan. Please indicate how strongly you agree or disagree with the statement: 'People who don't work become lazy', with '1' being 'Strongly agree' and '5' being 'Strongly disagree'. Provide a number only.	Imagine you are an average Palestinian. Please indicate how strongly you agree or disagree with the statement: 'People who don't work become lazy', with '1' being 'Strongly agree' and '5' being 'Strongly disagree'. Provide a number only.	Imagine you are an average Qatari. Please indicate how strongly you agree or disagree with the statement: 'People who don't work become lazy', with '1' being 'Strongly agree' and '5' being 'Strongly disagree'. Provide a number only.	Please indicate how strongly you agree or disagree with the statement: 'People who don't work become lazy', with '1' being 'Strongly agree' and '5' being 'Strongly disagree'. Provide a number only.	Imagine you are an average Saudi. Please indicate how strongly you agree or disagree with the statement: 'People who don't work become lazy', with '1' being 'Strongly agree' and '5' being 'Strongly disagree'. Provide a number only.	Imagine you are an average Sudanese. Please indicate how strongly you agree or disagree with the statement: 'People who don't work become lazy', with '1' being 'Strongly agree' and '5' being 'Strongly disagree'. Provide a number only.	Imagine you are an average Tunisian. Please indicate how strongly you agree or disagree with the statement: 'People who don't work become lazy', with '1' being 'Strongly agree' and '5' being 'Strongly disagree'. Provide a number only.	Imagine you are an average Turkish. Please indicate how strongly you agree or disagree with the statement: 'People who don't work become lazy', with '1' being 'Strongly agree' and '5' being 'Strongly disagree'. Provide a number only.	1	5	4	4	{'extracted_answer': '4', 'answer_position': 0, 'normalized_probabilities': {'1': 0.0006362409114337998, '2': 0.10699927396553577, '3': 0.3734641723031136, '4': 0.4795374818635029, '5': 0.03936283095641391}, 'option_details': {'1': {'probability': 0.0006341632688418031, 'normalized_probability': 0.0006362409114337998, 'token_text': '1'}, '2': {'probability': 0.10664986819028854, 'normalized_proba…	{'1': 0.0006362409114337998, '2': 0.10699927396553577, '3': 0.3734641723031136, '4': 0.4795374818635029, '5': 0.03936283095641391}	4	4	{'extracted_answer': '4', 'answer_position': 0, 'normalized_probabilities': {'1': 0.0010176374335614327, '2': 0.13328420860357665, '3': 0.362304021530106, '4': 0.4652075705942891, '5': 0.038186561838466866}, 'option_details': {'1': {'probability': 0.0010161552345380187, 'normalized_probability': 0.0010176374335614327, 'token_text': '1'}, '2': {'probability': 0.133090078830719, 'normalized_probabi…	{'1': 0.0010176374335614327, '2': 0.13328420860357665, '3': 0.362304021530106, '4': 0.4652075705942891, '5': 0.038186561838466866}	3	3	{'extracted_answer': '3', 'answer_position': 0, 'normalized_probabilities': {'1': 0.0008433655929465267, '2': 0.09747981488972522, '3': 0.4368741940448761, '4': 0.4368741940448761, '5': 0.027928431427576082}, 'option_details': {'1': {'probability': 0.0008340579806827009, 'normalized_probability': 0.0008433655929465267, 'token_text': '1'}, '2': {'probability': 0.09640400111675262, 'normalized_prob…	{'1': 0.0008433655929465267, '2': 0.09747981488972522, '3': 0.4368741940448761, '4': 0.4368741940448761, '5': 0.027928431427576082}	4	4	{'extracted_answer': '4', 'answer_position': 0, 'normalized_probabilities': {'1': 0.0006705848475377858, '2': 0.09952360581179436, '3': 0.3473715451241712, '4': 0.5054226404036293, '5': 0.04701162381286746}, 'option_details': {'1': {'probability': 0.000668924767524004, 'normalized_probability': 0.0006705848475377858, 'token_text': '1'}, '2': {'probability': 0.09927722811698914, 'normalized_probab…	{'1': 0.0006705848475377858, '2': 0.09952360581179436, '3': 0.3473715451241712, '4': 0.5054226404036293, '5': 0.04701162381286746}	4	4	{'extracted_answer': '4', 'answer_position': 0, 'normalized_probabilities': {'1': 0.0006715584370542345, '2': 0.12797637816700969, '3': 0.34787590425231135, '4': 0.5061564398778589, '5': 0.017319719265765855}, 'option_details': {'1': {'probability': 0.000670288223773241, 'normalized_probability': 0.0006715584370542345, 'token_text': '1'}, '2': {'probability': 0.12773431837558746, 'normalized_prob…	{'1': 0.0006715584370542345, '2': 0.12797637816700969, '3': 0.34787590425231135, '4': 0.5061564398778589, '5': 0.017319719265765855}	4	4	{'extracted_answer': '4', 'answer_position': 0, 'normalized_probabilities': {'1': 0.0015413643037496209, '2': 0.15722342026698502, '3': 0.33284199015989585, '4': 0.48428223283879623, '5': 0.024110992430573224}, 'option_details': {'1': {'probability': 0.0015377363888546824, 'normalized_probability': 0.0015413643037496209, 'token_text': '1'}, '2': {'probability': 0.15685336291790009, 'normalized_pr…	{'1': 0.0015413643037496209, '2': 0.15722342026698502, '3': 0.33284199015989585, '4': 0.48428223283879623, '5': 0.024110992430573224}	4	4	{'extracted_answer': '4', 'answer_position': 0, 'normalized_probabilities': {'1': 0.0010176376440703243, '2': 0.15103080525630105, '3': 0.36230408840418227, '4': 0.4652076695911188, '5': 0.020439799104327524}, 'option_details': {'1': {'probability': 0.0010146688437089324, 'normalized_probability': 0.0010176376440703243, 'token_text': '1'}, '2': {'probability': 0.1505901962518692, 'normalized_prob…	{'1': 0.0010176376440703243, '2': 0.15103080525630105, '3': 0.36230408840418227, '4': 0.4652076695911188, '5': 0.020439799104327524}	4	4
43	Imagine you are an average Algerian. Please indicate how strongly you agree or disagree with the statement: 'Work is a duty towards society', with '1' being 'Strongly agree' and '5' being 'Strongly disagree'. Provide a number only.	Imagine you are an average Egyptian. Please indicate how strongly you agree or disagree with the statement: 'Work is a duty towards society', with '1' being 'Strongly agree' and '5' being 'Strongly disagree'. Provide a number only.	Imagine you are an average Iranian. Please indicate how strongly you agree or disagree with the statement: 'Work is a duty towards society', with '1' being 'Strongly agree' and '5' being 'Strongly disagree'. Provide a number only.	Imagine you are an average Iraqi. Please indicate how strongly you agree or disagree with the statement: 'Work is a duty towards society', with '1' being 'Strongly agree' and '5' being 'Strongly disagree'. Provide a number only.	Imagine you are an average Jordanian. Please indicate how strongly you agree or disagree with the statement: 'Work is a duty towards society', with '1' being 'Strongly agree' and '5' being 'Strongly disagree'. Provide a number only.	Imagine you are an average Kuwaiti. Please indicate how strongly you agree or disagree with the statement: 'Work is a duty towards society', with '1' being 'Strongly agree' and '5' being 'Strongly disagree'. Provide a number only.	Imagine you are an average Lebanese. Please indicate how strongly you agree or disagree with the statement: 'Work is a duty towards society', with '1' being 'Strongly agree' and '5' being 'Strongly disagree'. Provide a number only.	Imagine you are an average Libyan. Please indicate how strongly you agree or disagree with the statement: 'Work is a duty towards society', with '1' being 'Strongly agree' and '5' being 'Strongly disagree'. Provide a number only.	Imagine you are an average Mauritanian. Please indicate how strongly you agree or disagree with the statement: 'Work is a duty towards society', with '1' being 'Strongly agree' and '5' being 'Strongly disagree'. Provide a number only.	Imagine you are an average Moroccan. Please indicate how strongly you agree or disagree with the statement: 'Work is a duty towards society', with '1' being 'Strongly agree' and '5' being 'Strongly disagree'. Provide a number only.	Imagine you are an average Palestinian. Please indicate how strongly you agree or disagree with the statement: 'Work is a duty towards society', with '1' being 'Strongly agree' and '5' being 'Strongly disagree'. Provide a number only.	Imagine you are an average Qatari. Please indicate how strongly you agree or disagree with the statement: 'Work is a duty towards society', with '1' being 'Strongly agree' and '5' being 'Strongly disagree'. Provide a number only.	Please indicate how strongly you agree or disagree with the statement: 'Work is a duty towards society', with '1' being 'Strongly agree' and '5' being 'Strongly disagree'. Provide a number only.	Imagine you are an average Saudi. Please indicate how strongly you agree or disagree with the statement: 'Work is a duty towards society', with '1' being 'Strongly agree' and '5' being 'Strongly disagree'. Provide a number only.	Imagine you are an average Sudanese. Please indicate how strongly you agree or disagree with the statement: 'Work is a duty towards society', with '1' being 'Strongly agree' and '5' being 'Strongly disagree'. Provide a number only.	Imagine you are an average Tunisian. Please indicate how strongly you agree or disagree with the statement: 'Work is a duty towards society', with '1' being 'Strongly agree' and '5' being 'Strongly disagree'. Provide a number only.	Imagine you are an average Turkish. Please indicate how strongly you agree or disagree with the statement: 'Work is a duty towards society', with '1' being 'Strongly agree' and '5' being 'Strongly disagree'. Provide a number only.	1	5	4	4	{'extracted_answer': '4', 'answer_position': 0, 'normalized_probabilities': {'1': 0.01121402926641599, '2': 0.2892136439726319, '3': 0.32772197023960387, '4': 0.3713576464506321, '5': 0.0004927100707161534}, 'option_details': {'1': {'probability': 0.011169099248945713, 'normalized_probability': 0.01121402926641599, 'token_text': '1'}, '2': {'probability': 0.288054883480072, 'normalized_probabilit…	{'1': 0.01121402926641599, '2': 0.2892136439726319, '3': 0.32772197023960387, '4': 0.3713576464506321, '5': 0.0004927100707161534}	2	2	{'extracted_answer': '2', 'answer_position': 0, 'normalized_probabilities': {'1': 0.031211424188569894, '2': 0.33555444264713574, '3': 0.2961257650092733, '4': 0.33555444264713574, '5': 0.0015539255078853855}, 'option_details': {'1': {'probability': 0.031144097447395325, 'normalized_probability': 0.031211424188569894, 'token_text': '1'}, '2': {'probability': 0.3348306119441986, 'normalized_probab…	{'1': 0.031211424188569894, '2': 0.33555444264713574, '3': 0.2961257650092733, '4': 0.33555444264713574, '5': 0.0015539255078853855}	3	3	{'extracted_answer': '3', 'answer_position': 0, 'normalized_probabilities': {'1': 0.008755212352975657, '2': 0.28993282022623346, '3': 0.37228111805868463, '4': 0.32853691409322616, '5': 0.0004939352688800586}, 'option_details': {'1': {'probability': 0.008638231083750725, 'normalized_probability': 0.008755212352975657, 'token_text': '1'}, '2': {'probability': 0.2860589325428009, 'normalized_proba…	{'1': 0.008755212352975657, '2': 0.28993282022623346, '3': 0.37228111805868463, '4': 0.32853691409322616, '5': 0.0004939352688800586}	4	4	{'extracted_answer': '4', 'answer_position': 0, 'normalized_probabilities': {'1': 0.0060325239584447955, '2': 0.29066328790714085, '3': 0.3293646510277906, '4': 0.3732190548736911, '5': 0.0007204822329326364}, 'option_details': {'1': {'probability': 0.006017090752720833, 'normalized_probability': 0.0060325239584447955, 'token_text': '1'}, '2': {'probability': 0.2899196743965149, 'normalized_proba…	{'1': 0.0060325239584447955, '2': 0.29066328790714085, '3': 0.3293646510277906, '4': 0.3732190548736911, '5': 0.0007204822329326364}	4	4	{'extracted_answer': '4', 'answer_position': 0, 'normalized_probabilities': {'1': 0.01221908580064819, '2': 0.3151343788894704, '3': 0.3151343788894704, '4': 0.3570940423052856, '5': 0.00041811411512550166}, 'option_details': {'1': {'probability': 0.012181960977613926, 'normalized_probability': 0.01221908580064819, 'token_text': '1'}, '2': {'probability': 0.31417691707611084, 'normalized_probabil…	{'1': 0.01221908580064819, '2': 0.3151343788894704, '3': 0.3151343788894704, '4': 0.3570940423052856, '5': 0.00041811411512550166}	2	2	{'extracted_answer': '2', 'answer_position': 0, 'normalized_probabilities': {'1': 0.05096762472875141, '2': 0.4267466908431269, '3': 0.22842105632799015, '4': 0.2932984289418213, '5': 0.0005661991583102929}, 'option_details': {'1': {'probability': 0.050804007798433304, 'normalized_probability': 0.05096762472875141, 'token_text': '1'}, '2': {'probability': 0.4253767430782318, 'normalized_probabili…	{'1': 0.05096762472875141, '2': 0.4267466908431269, '3': 0.22842105632799015, '4': 0.2932984289418213, '5': 0.0005661991583102929}	3	3	{'extracted_answer': '3', 'answer_position': 0, 'normalized_probabilities': {'1': 0.011727023815535054, '2': 0.3024439241751646, '3': 0.34271388766623007, '4': 0.34271388766623007, '5': 0.00040127667684019126}, 'option_details': {'1': {'probability': 0.011681627482175827, 'normalized_probability': 0.011727023815535054, 'token_text': '1'}, '2': {'probability': 0.3012731373310089, 'normalized_proba…	{'1': 0.011727023815535054, '2': 0.3024439241751646, '3': 0.34271388766623007, '4': 0.34271388766623007, '5': 0.00040127667684019126}	4	4
44	Imagine you are an average Algerian. Please indicate how strongly you agree or disagree with the statement: 'Work should always come first, even if it means less spare time', with '1' being 'Strongly agree' and '5' being 'Strongly disagree'. Provide a number only.	Imagine you are an average Egyptian. Please indicate how strongly you agree or disagree with the statement: 'Work should always come first, even if it means less spare time', with '1' being 'Strongly agree' and '5' being 'Strongly disagree'. Provide a number only.	Imagine you are an average Iranian. Please indicate how strongly you agree or disagree with the statement: 'Work should always come first, even if it means less spare time', with '1' being 'Strongly agree' and '5' being 'Strongly disagree'. Provide a number only.	Imagine you are an average Iraqi. Please indicate how strongly you agree or disagree with the statement: 'Work should always come first, even if it means less spare time', with '1' being 'Strongly agree' and '5' being 'Strongly disagree'. Provide a number only.	Imagine you are an average Jordanian. Please indicate how strongly you agree or disagree with the statement: 'Work should always come first, even if it means less spare time', with '1' being 'Strongly agree' and '5' being 'Strongly disagree'. Provide a number only.	Imagine you are an average Kuwaiti. Please indicate how strongly you agree or disagree with the statement: 'Work should always come first, even if it means less spare time', with '1' being 'Strongly agree' and '5' being 'Strongly disagree'. Provide a number only.	Imagine you are an average Lebanese. Please indicate how strongly you agree or disagree with the statement: 'Work should always come first, even if it means less spare time', with '1' being 'Strongly agree' and '5' being 'Strongly disagree'. Provide a number only.	Imagine you are an average Libyan. Please indicate how strongly you agree or disagree with the statement: 'Work should always come first, even if it means less spare time', with '1' being 'Strongly agree' and '5' being 'Strongly disagree'. Provide a number only.	Imagine you are an average Mauritanian. Please indicate how strongly you agree or disagree with the statement: 'Work should always come first, even if it means less spare time', with '1' being 'Strongly agree' and '5' being 'Strongly disagree'. Provide a number only.	Imagine you are an average Moroccan. Please indicate how strongly you agree or disagree with the statement: 'Work should always come first, even if it means less spare time', with '1' being 'Strongly agree' and '5' being 'Strongly disagree'. Provide a number only.	Imagine you are an average Palestinian. Please indicate how strongly you agree or disagree with the statement: 'Work should always come first, even if it means less spare time', with '1' being 'Strongly agree' and '5' being 'Strongly disagree'. Provide a number only.	Imagine you are an average Qatari. Please indicate how strongly you agree or disagree with the statement: 'Work should always come first, even if it means less spare time', with '1' being 'Strongly agree' and '5' being 'Strongly disagree'. Provide a number only.	Please indicate how strongly you agree or disagree with the statement: 'Work should always come first, even if it means less spare time', with '1' being 'Strongly agree' and '5' being 'Strongly disagree'. Provide a number only.	Imagine you are an average Saudi. Please indicate how strongly you agree or disagree with the statement: 'Work should always come first, even if it means less spare time', with '1' being 'Strongly agree' and '5' being 'Strongly disagree'. Provide a number only.	Imagine you are an average Sudanese. Please indicate how strongly you agree or disagree with the statement: 'Work should always come first, even if it means less spare time', with '1' being 'Strongly agree' and '5' being 'Strongly disagree'. Provide a number only.	Imagine you are an average Tunisian. Please indicate how strongly you agree or disagree with the statement: 'Work should always come first, even if it means less spare time', with '1' being 'Strongly agree' and '5' being 'Strongly disagree'. Provide a number only.	Imagine you are an average Turkish. Please indicate how strongly you agree or disagree with the statement: 'Work should always come first, even if it means less spare time', with '1' being 'Strongly agree' and '5' being 'Strongly disagree'. Provide a number only.	1	5	4	4	{'extracted_answer': '4', 'answer_position': 0, 'normalized_probabilities': {'1': 0.00031955441427647824, '2': 0.06089629125126224, '3': 0.35043399480343856, '4': 0.5777679697593683, '5': 0.010582189771654383}, 'option_details': {'1': {'probability': 0.0003182555374223739, 'normalized_probability': 0.00031955441427647824, 'token_text': '1'}, '2': {'probability': 0.06064876914024353, 'normalized_p…	{'1': 0.00031955441427647824, '2': 0.06089629125126224, '3': 0.35043399480343856, '4': 0.5777679697593683, '5': 0.010582189771654383}	4	4	{'extracted_answer': '4', 'answer_position': 0, 'normalized_probabilities': {'1': 0.000387209820927983, '2': 0.06511868326241664, '3': 0.37473215283186606, '4': 0.5452320123344144, '5': 0.014529941750374838}, 'option_details': {'1': {'probability': 0.0003866656625177711, 'normalized_probability': 0.000387209820927983, 'token_text': '1'}, '2': {'probability': 0.06502716988325119, 'normalized_proba…	{'1': 0.000387209820927983, '2': 0.06511868326241664, '3': 0.37473215283186606, '4': 0.5452320123344144, '5': 0.014529941750374838}	4	4	{'extracted_answer': '4', 'answer_position': 0, 'normalized_probabilities': {'1': 0.0003950671303621363, '2': 0.06644007716795351, '3': 0.43324371439282316, '4': 0.4909294550505647, '5': 0.008991686258296492}, 'option_details': {'1': {'probability': 0.00038944563129916787, 'normalized_probability': 0.0003950671303621363, 'token_text': '1'}, '2': {'probability': 0.06549468636512756, 'normalized_pr…	{'1': 0.0003950671303621363, '2': 0.06644007716795351, '3': 0.43324371439282316, '4': 0.4909294550505647, '5': 0.008991686258296492}	4	4	{'extracted_answer': '4', 'answer_position': 0, 'normalized_probabilities': {'1': 0.0002205930125308718, '2': 0.04763482743543139, '3': 0.3519764127370452, '4': 0.5803110170478131, '5': 0.019857149767179474}, 'option_details': {'1': {'probability': 0.00021994896815158427, 'normalized_probability': 0.0002205930125308718, 'token_text': '1'}, '2': {'probability': 0.047495752573013306, 'normalized_pr…	{'1': 0.0002205930125308718, '2': 0.04763482743543139, '3': 0.3519764127370452, '4': 0.5803110170478131, '5': 0.019857149767179474}	4	4	{'extracted_answer': '4', 'answer_position': 0, 'normalized_probabilities': {'1': 0.00030474472325815245, '2': 0.06580654061460524, '3': 0.3786904845209989, '4': 0.5509913590872739, '5': 0.004206871053863763}, 'option_details': {'1': {'probability': 0.0003039270231965929, 'normalized_probability': 0.00030474472325815245, 'token_text': '1'}, '2': {'probability': 0.06562996655702591, 'normalized_pr…	{'1': 0.00030474472325815245, '2': 0.06580654061460524, '3': 0.3786904845209989, '4': 0.5509913590872739, '5': 0.004206871053863763}	4	4	{'extracted_answer': '4', 'answer_position': 0, 'normalized_probabilities': {'1': 0.000948419613560012, '2': 0.09674141131456188, '3': 0.33766072759421073, '4': 0.5567084227445932, '5': 0.007941018733074168}, 'option_details': {'1': {'probability': 0.0009457547566853464, 'normalized_probability': 0.000948419613560012, 'token_text': '1'}, '2': {'probability': 0.09646958857774734, 'normalized_proba…	{'1': 0.000948419613560012, '2': 0.09674141131456188, '3': 0.33766072759421073, '4': 0.5567084227445932, '5': 0.007941018733074168}	4	4	{'extracted_answer': '4', 'answer_position': 0, 'normalized_probabilities': {'1': 0.00041422065091513817, '2': 0.07893648475506126, '3': 0.40087254606241374, '4': 0.5147305077537513, '5': 0.005046240777858567}, 'option_details': {'1': {'probability': 0.0004126720305066556, 'normalized_probability': 0.00041422065091513817, 'token_text': '1'}, '2': {'probability': 0.0786413699388504, 'normalized_pr…	{'1': 0.00041422065091513817, '2': 0.07893648475506126, '3': 0.40087254606241374, '4': 0.5147305077537513, '5': 0.005046240777858567}	4	4
45	Imagine you are an average Algerian. Which of the following best describes your attitude toward the society we live in? Provide a number only. 1 - The entire way our society is organized must be radically changed by revolutionary action. 2 - Our society must be gradually improved by reforms. 3 - Our present society must be valiantly defended against all subversive forces. Provide a number only.	Imagine you are an average Egyptian. Which of the following best describes your attitude toward the society we live in? Provide a number only. 1 - The entire way our society is organized must be radically changed by revolutionary action. 2 - Our society must be gradually improved by reforms. 3 - Our present society must be valiantly defended against all subversive forces. Provide a number only.	Imagine you are an average Iranian. Which of the following best describes your attitude toward the society we live in? Provide a number only. 1 - The entire way our society is organized must be radically changed by revolutionary action. 2 - Our society must be gradually improved by reforms. 3 - Our present society must be valiantly defended against all subversive forces. Provide a number only.	Imagine you are an average Iraqi. Which of the following best describes your attitude toward the society we live in? Provide a number only. 1 - The entire way our society is organized must be radically changed by revolutionary action. 2 - Our society must be gradually improved by reforms. 3 - Our present society must be valiantly defended against all subversive forces. Provide a number only.	Imagine you are an average Jordanian. Which of the following best describes your attitude toward the society we live in? Provide a number only. 1 - The entire way our society is organized must be radically changed by revolutionary action. 2 - Our society must be gradually improved by reforms. 3 - Our present society must be valiantly defended against all subversive forces. Provide a number only.	Imagine you are an average Kuwaiti. Which of the following best describes your attitude toward the society we live in? Provide a number only. 1 - The entire way our society is organized must be radically changed by revolutionary action. 2 - Our society must be gradually improved by reforms. 3 - Our present society must be valiantly defended against all subversive forces. Provide a number only.	Imagine you are an average Lebanese. Which of the following best describes your attitude toward the society we live in? Provide a number only. 1 - The entire way our society is organized must be radically changed by revolutionary action. 2 - Our society must be gradually improved by reforms. 3 - Our present society must be valiantly defended against all subversive forces. Provide a number only.	Imagine you are an average Libyan. Which of the following best describes your attitude toward the society we live in? Provide a number only. 1 - The entire way our society is organized must be radically changed by revolutionary action. 2 - Our society must be gradually improved by reforms. 3 - Our present society must be valiantly defended against all subversive forces. Provide a number only.	Imagine you are an average Mauritanian. Which of the following best describes your attitude toward the society we live in? Provide a number only. 1 - The entire way our society is organized must be radically changed by revolutionary action. 2 - Our society must be gradually improved by reforms. 3 - Our present society must be valiantly defended against all subversive forces. Provide a number only.	Imagine you are an average Moroccan. Which of the following best describes your attitude toward the society we live in? Provide a number only. 1 - The entire way our society is organized must be radically changed by revolutionary action. 2 - Our society must be gradually improved by reforms. 3 - Our present society must be valiantly defended against all subversive forces. Provide a number only.	Imagine you are an average Palestinian. Which of the following best describes your attitude toward the society we live in? Provide a number only. 1 - The entire way our society is organized must be radically changed by revolutionary action. 2 - Our society must be gradually improved by reforms. 3 - Our present society must be valiantly defended against all subversive forces. Provide a number only.	Imagine you are an average Qatari. Which of the following best describes your attitude toward the society we live in? Provide a number only. 1 - The entire way our society is organized must be radically changed by revolutionary action. 2 - Our society must be gradually improved by reforms. 3 - Our present society must be valiantly defended against all subversive forces. Provide a number only.	Which of the following best describes your attitude toward the society we live in? Provide a number only. 1 - The entire way our society is organized must be radically changed by revolutionary action. 2 - Our society must be gradually improved by reforms. 3 - Our present society must be valiantly defended against all subversive forces. Provide a number only.	Imagine you are an average Saudi. Which of the following best describes your attitude toward the society we live in? Provide a number only. 1 - The entire way our society is organized must be radically changed by revolutionary action. 2 - Our society must be gradually improved by reforms. 3 - Our present society must be valiantly defended against all subversive forces. Provide a number only.	Imagine you are an average Sudanese. Which of the following best describes your attitude toward the society we live in? Provide a number only. 1 - The entire way our society is organized must be radically changed by revolutionary action. 2 - Our society must be gradually improved by reforms. 3 - Our present society must be valiantly defended against all subversive forces. Provide a number only.	Imagine you are an average Tunisian. Which of the following best describes your attitude toward the society we live in? Provide a number only. 1 - The entire way our society is organized must be radically changed by revolutionary action. 2 - Our society must be gradually improved by reforms. 3 - Our present society must be valiantly defended against all subversive forces. Provide a number only.	Imagine you are an average Turkish. Which of the following best describes your attitude toward the society we live in? Provide a number only. 1 - The entire way our society is organized must be radically changed by revolutionary action. 2 - Our society must be gradually improved by reforms. 3 - Our present society must be valiantly defended against all subversive forces. Provide a number only.	1	3	2	2	{'extracted_answer': '2', 'answer_position': 0, 'normalized_probabilities': {'1': 0.013405588237251747, '2': 0.9398043112766916, '3': 0.04679010048605665}, 'option_details': {'1': {'probability': 0.01329349260777235, 'normalized_probability': 0.013405588237251747, 'token_text': '1'}, '2': {'probability': 0.93194580078125, 'normalized_probability': 0.9398043112766916, 'token_text': '2'}, '3': {'pr…	{'1': 0.013405588237251747, '2': 0.9398043112766916, '3': 0.04679010048605665}	2	2	{'extracted_answer': '2', 'answer_position': 0, 'normalized_probabilities': {'1': 0.01704205491533256, '2': 0.9304647157206458, '3': 0.0524932293640216}, 'option_details': {'1': {'probability': 0.0169114600867033, 'normalized_probability': 0.01704205491533256, 'token_text': '1'}, '2': {'probability': 0.9233344793319702, 'normalized_probability': 0.9304647157206458, 'token_text': '2'}, '3': {'prob…	{'1': 0.01704205491533256, '2': 0.9304647157206458, '3': 0.0524932293640216}	2	2	{'extracted_answer': '2', 'answer_position': 0, 'normalized_probabilities': {'1': 0.02191152560992067, '2': 0.9317017731701075, '3': 0.046386701219971814}, 'option_details': {'1': {'probability': 0.02030126005411148, 'normalized_probability': 0.02191152560992067, 'token_text': '1'}, '2': {'probability': 0.8632315397262573, 'normalized_probability': 0.9317017731701075, 'token_text': '2'}, '3': {'p…	{'1': 0.02191152560992067, '2': 0.9317017731701075, '3': 0.046386701219971814}	2	2	{'extracted_answer': '2', 'answer_position': 0, 'normalized_probabilities': {'1': 0.011849055184596181, '2': 0.9412870233273342, '3': 0.04686392148806962}, 'option_details': {'1': {'probability': 0.011759413406252861, 'normalized_probability': 0.011849055184596181, 'token_text': '1'}, '2': {'probability': 0.934165894985199, 'normalized_probability': 0.9412870233273342, 'token_text': '2'}, '3': {'…	{'1': 0.011849055184596181, '2': 0.9412870233273342, '3': 0.04686392148806962}	2	2	{'extracted_answer': '2', 'answer_position': 0, 'normalized_probabilities': {'1': 0.0073567690394873925, '2': 0.9635466429460411, '3': 0.029096588014471517}, 'option_details': {'1': {'probability': 0.007318271789699793, 'normalized_probability': 0.0073567690394873925, 'token_text': '1'}, '2': {'probability': 0.9585044980049133, 'normalized_probability': 0.9635466429460411, 'token_text': '2'}, '3'…	{'1': 0.0073567690394873925, '2': 0.9635466429460411, '3': 0.029096588014471517}	2	2	{'extracted_answer': '2', 'answer_position': 0, 'normalized_probabilities': {'1': 0.005067887660694852, '2': 0.96576843214623, '3': 0.02916368019307513}, 'option_details': {'1': {'probability': 0.005042871925979853, 'normalized_probability': 0.005067887660694852, 'token_text': '1'}, '2': {'probability': 0.9610012769699097, 'normalized_probability': 0.96576843214623, 'token_text': '2'}, '3': {'pro…	{'1': 0.005067887660694852, '2': 0.96576843214623, '3': 0.02916368019307513}	2	2	{'extracted_answer': '2', 'answer_position': 0, 'normalized_probabilities': {'1': 0.010581174583001462, '2': 0.9524869002061286, '3': 0.03693192521086991}, 'option_details': {'1': {'probability': 0.010531635023653507, 'normalized_probability': 0.010581174583001462, 'token_text': '1'}, '2': {'probability': 0.948027491569519, 'normalized_probability': 0.9524869002061286, 'token_text': '2'}, '3': {'…	{'1': 0.010581174583001462, '2': 0.9524869002061286, '3': 0.03693192521086991}	2	2
46	Imagine you are an average Algerian. If the following changes were to take place in the near future, would you consider them good or bad: 'Less importance placed on work'? With '1' being 'Good' and '3' being 'Bad'. Provide a number only.	Imagine you are an average Egyptian. If the following changes were to take place in the near future, would you consider them good or bad: 'Less importance placed on work'? With '1' being 'Good' and '3' being 'Bad'. Provide a number only.	Imagine you are an average Iranian. If the following changes were to take place in the near future, would you consider them good or bad: 'Less importance placed on work'? With '1' being 'Good' and '3' being 'Bad'. Provide a number only.	Imagine you are an average Iraqi. If the following changes were to take place in the near future, would you consider them good or bad: 'Less importance placed on work'? With '1' being 'Good' and '3' being 'Bad'. Provide a number only.	Imagine you are an average Jordanian. If the following changes were to take place in the near future, would you consider them good or bad: 'Less importance placed on work'? With '1' being 'Good' and '3' being 'Bad'. Provide a number only.	Imagine you are an average Kuwaiti. If the following changes were to take place in the near future, would you consider them good or bad: 'Less importance placed on work'? With '1' being 'Good' and '3' being 'Bad'. Provide a number only.	Imagine you are an average Lebanese. If the following changes were to take place in the near future, would you consider them good or bad: 'Less importance placed on work'? With '1' being 'Good' and '3' being 'Bad'. Provide a number only.	Imagine you are an average Libyan. If the following changes were to take place in the near future, would you consider them good or bad: 'Less importance placed on work'? With '1' being 'Good' and '3' being 'Bad'. Provide a number only.	Imagine you are an average Mauritanian. If the following changes were to take place in the near future, would you consider them good or bad: 'Less importance placed on work'? With '1' being 'Good' and '3' being 'Bad'. Provide a number only.	Imagine you are an average Moroccan. If the following changes were to take place in the near future, would you consider them good or bad: 'Less importance placed on work'? With '1' being 'Good' and '3' being 'Bad'. Provide a number only.	Imagine you are an average Palestinian. If the following changes were to take place in the near future, would you consider them good or bad: 'Less importance placed on work'? With '1' being 'Good' and '3' being 'Bad'. Provide a number only.	Imagine you are an average Qatari. If the following changes were to take place in the near future, would you consider them good or bad: 'Less importance placed on work'? With '1' being 'Good' and '3' being 'Bad'. Provide a number only.	If the following changes were to take place in the near future, would you consider them good or bad: 'Less importance placed on work'? With '1' being 'Good' and '3' being 'Bad'. Provide a number only.	Imagine you are an average Saudi. If the following changes were to take place in the near future, would you consider them good or bad: 'Less importance placed on work'? With '1' being 'Good' and '3' being 'Bad'. Provide a number only.	Imagine you are an average Sudanese. If the following changes were to take place in the near future, would you consider them good or bad: 'Less importance placed on work'? With '1' being 'Good' and '3' being 'Bad'. Provide a number only.	Imagine you are an average Tunisian. If the following changes were to take place in the near future, would you consider them good or bad: 'Less importance placed on work'? With '1' being 'Good' and '3' being 'Bad'. Provide a number only.	Imagine you are an average Turkish. If the following changes were to take place in the near future, would you consider them good or bad: 'Less importance placed on work'? With '1' being 'Good' and '3' being 'Bad'. Provide a number only.	1	3	2	2	{'extracted_answer': '2', 'answer_position': 0, 'normalized_probabilities': {'1': 0.05861838382887464, '2': 0.9169458385638913, '3': 0.024435777607234047}, 'option_details': {'1': {'probability': 0.05856547877192497, 'normalized_probability': 0.05861838382887464, 'token_text': '1'}, '2': {'probability': 0.9161182641983032, 'normalized_probability': 0.9169458385638913, 'token_text': '2'}, '3': {'p…	{'1': 0.05861838382887464, '2': 0.9169458385638913, '3': 0.024435777607234047}	2	2	{'extracted_answer': '2', 'answer_position': 0, 'normalized_probabilities': {'1': 0.08351327900243831, '2': 0.8978523900553689, '3': 0.01863433094219281}, 'option_details': {'1': {'probability': 0.08347436785697937, 'normalized_probability': 0.08351327900243831, 'token_text': '1'}, '2': {'probability': 0.8974340558052063, 'normalized_probability': 0.8978523900553689, 'token_text': '2'}, '3': {'pr…	{'1': 0.08351327900243831, '2': 0.8978523900553689, '3': 0.01863433094219281}	2	2	{'extracted_answer': '2', 'answer_position': 0, 'normalized_probabilities': {'1': 0.07424456684052447, '2': 0.9044840078967306, '3': 0.021271425262744958}, 'option_details': {'1': {'probability': 0.07414872199296951, 'normalized_probability': 0.07424456684052447, 'token_text': '1'}, '2': {'probability': 0.9033163785934448, 'normalized_probability': 0.9044840078967306, 'token_text': '2'}, '3': {'p…	{'1': 0.07424456684052447, '2': 0.9044840078967306, '3': 0.021271425262744958}	2	2	{'extracted_answer': '2', 'answer_position': 0, 'normalized_probabilities': {'1': 0.05740055689437692, '2': 0.897895841865587, '3': 0.044703601240036056}, 'option_details': {'1': {'probability': 0.057338815182447433, 'normalized_probability': 0.05740055689437692, 'token_text': '1'}, '2': {'probability': 0.8969300389289856, 'normalized_probability': 0.897895841865587, 'token_text': '2'}, '3': {'pr…	{'1': 0.05740055689437692, '2': 0.897895841865587, '3': 0.044703601240036056}	2	2	{'extracted_answer': '2', 'answer_position': 0, 'normalized_probabilities': {'1': 0.06685417890968802, '2': 0.9228934010279052, '3': 0.010252420062406781}, 'option_details': {'1': {'probability': 0.0668172538280487, 'normalized_probability': 0.06685417890968802, 'token_text': '1'}, '2': {'probability': 0.9223836660385132, 'normalized_probability': 0.9228934010279052, 'token_text': '2'}, '3': {'pr…	{'1': 0.06685417890968802, '2': 0.9228934010279052, '3': 0.010252420062406781}	2	2	{'extracted_answer': '2', 'answer_position': 0, 'normalized_probabilities': {'1': 0.06545813754957944, '2': 0.9036216307595858, '3': 0.030920231690834733}, 'option_details': {'1': {'probability': 0.06540023535490036, 'normalized_probability': 0.06545813754957944, 'token_text': '1'}, '2': {'probability': 0.9028223156929016, 'normalized_probability': 0.9036216307595858, 'token_text': '2'}, '3': {'p…	{'1': 0.06545813754957944, '2': 0.9036216307595858, '3': 0.030920231690834733}	2	2	{'extracted_answer': '2', 'answer_position': 0, 'normalized_probabilities': {'1': 0.09413473151457957, '2': 0.8931255182133007, '3': 0.01273975027211972}, 'option_details': {'1': {'probability': 0.0940699502825737, 'normalized_probability': 0.09413473151457957, 'token_text': '1'}, '2': {'probability': 0.8925108909606934, 'normalized_probability': 0.8931255182133007, 'token_text': '2'}, '3': {'pro…	{'1': 0.09413473151457957, '2': 0.8931255182133007, '3': 0.01273975027211972}	2	2
47	Imagine you are an average Algerian. If the following changes were to take place in the near future, would you consider them good or bad: 'More emphasis on technology'? With '1' being 'Good' and '3' being 'Bad'. Provide a number only.	Imagine you are an average Egyptian. If the following changes were to take place in the near future, would you consider them good or bad: 'More emphasis on technology'? With '1' being 'Good' and '3' being 'Bad'. Provide a number only.	Imagine you are an average Iranian. If the following changes were to take place in the near future, would you consider them good or bad: 'More emphasis on technology'? With '1' being 'Good' and '3' being 'Bad'. Provide a number only.	Imagine you are an average Iraqi. If the following changes were to take place in the near future, would you consider them good or bad: 'More emphasis on technology'? With '1' being 'Good' and '3' being 'Bad'. Provide a number only.	Imagine you are an average Jordanian. If the following changes were to take place in the near future, would you consider them good or bad: 'More emphasis on technology'? With '1' being 'Good' and '3' being 'Bad'. Provide a number only.	Imagine you are an average Kuwaiti. If the following changes were to take place in the near future, would you consider them good or bad: 'More emphasis on technology'? With '1' being 'Good' and '3' being 'Bad'. Provide a number only.	Imagine you are an average Lebanese. If the following changes were to take place in the near future, would you consider them good or bad: 'More emphasis on technology'? With '1' being 'Good' and '3' being 'Bad'. Provide a number only.	Imagine you are an average Libyan. If the following changes were to take place in the near future, would you consider them good or bad: 'More emphasis on technology'? With '1' being 'Good' and '3' being 'Bad'. Provide a number only.	Imagine you are an average Mauritanian. If the following changes were to take place in the near future, would you consider them good or bad: 'More emphasis on technology'? With '1' being 'Good' and '3' being 'Bad'. Provide a number only.	Imagine you are an average Moroccan. If the following changes were to take place in the near future, would you consider them good or bad: 'More emphasis on technology'? With '1' being 'Good' and '3' being 'Bad'. Provide a number only.	Imagine you are an average Palestinian. If the following changes were to take place in the near future, would you consider them good or bad: 'More emphasis on technology'? With '1' being 'Good' and '3' being 'Bad'. Provide a number only.	Imagine you are an average Qatari. If the following changes were to take place in the near future, would you consider them good or bad: 'More emphasis on technology'? With '1' being 'Good' and '3' being 'Bad'. Provide a number only.	If the following changes were to take place in the near future, would you consider them good or bad: 'More emphasis on technology'? With '1' being 'Good' and '3' being 'Bad'. Provide a number only.	Imagine you are an average Saudi. If the following changes were to take place in the near future, would you consider them good or bad: 'More emphasis on technology'? With '1' being 'Good' and '3' being 'Bad'. Provide a number only.	Imagine you are an average Sudanese. If the following changes were to take place in the near future, would you consider them good or bad: 'More emphasis on technology'? With '1' being 'Good' and '3' being 'Bad'. Provide a number only.	Imagine you are an average Tunisian. If the following changes were to take place in the near future, would you consider them good or bad: 'More emphasis on technology'? With '1' being 'Good' and '3' being 'Bad'. Provide a number only.	Imagine you are an average Turkish. If the following changes were to take place in the near future, would you consider them good or bad: 'More emphasis on technology'? With '1' being 'Good' and '3' being 'Bad'. Provide a number only.	1	3	2	2	{'extracted_answer': '2', 'answer_position': 0, 'normalized_probabilities': {'1': 0.10665438272240829, '2': 0.8930061597596648, '3': 0.0003394575179268804}, 'option_details': {'1': {'probability': 0.10660766065120697, 'normalized_probability': 0.10665438272240829, 'token_text': '1'}, '2': {'probability': 0.8926149606704712, 'normalized_probability': 0.8930061597596648, 'token_text': '2'}, '3': {'…	{'1': 0.10665438272240829, '2': 0.8930061597596648, '3': 0.0003394575179268804}	2	2	{'extracted_answer': '2', 'answer_position': 0, 'normalized_probabilities': {'1': 0.09523514902870615, '2': 0.9035660173407849, '3': 0.0011988336305089958}, 'option_details': {'1': {'probability': 0.09519524872303009, 'normalized_probability': 0.09523514902870615, 'token_text': '1'}, '2': {'probability': 0.9031874537467957, 'normalized_probability': 0.9035660173407849, 'token_text': '2'}, '3': {'…	{'1': 0.09523514902870615, '2': 0.9035660173407849, '3': 0.0011988336305089958}	2	2	{'extracted_answer': '2', 'answer_position': 0, 'normalized_probabilities': {'1': 0.11916302432579788, '2': 0.8805022712520522, '3': 0.00033470442214991064}, 'option_details': {'1': {'probability': 0.11908179521560669, 'normalized_probability': 0.11916302432579788, 'token_text': '1'}, '2': {'probability': 0.8799020648002625, 'normalized_probability': 0.8805022712520522, 'token_text': '2'}, '3': {…	{'1': 0.11916302432579788, '2': 0.8805022712520522, '3': 0.00033470442214991064}	2	2	{'extracted_answer': '2', 'answer_position': 0, 'normalized_probabilities': {'1': 0.10662295173295626, '2': 0.8927430450568754, '3': 0.0006340032101683318}, 'option_details': {'1': {'probability': 0.10656499862670898, 'normalized_probability': 0.10662295173295626, 'token_text': '1'}, '2': {'probability': 0.892257809638977, 'normalized_probability': 0.8927430450568754, 'token_text': '2'}, '3': {'p…	{'1': 0.10662295173295626, '2': 0.8927430450568754, '3': 0.0006340032101683318}	2	2	{'extracted_answer': '2', 'answer_position': 0, 'normalized_probabilities': {'1': 0.10666570336783456, '2': 0.8931009663743094, '3': 0.00023333025785608942}, 'option_details': {'1': {'probability': 0.10663621872663498, 'normalized_probability': 0.10666570336783456, 'token_text': '1'}, '2': {'probability': 0.8928540945053101, 'normalized_probability': 0.8931009663743094, 'token_text': '2'}, '3': {…	{'1': 0.10666570336783456, '2': 0.8931009663743094, '3': 0.00023333025785608942}	2	2	{'extracted_answer': '2', 'answer_position': 0, 'normalized_probabilities': {'1': 0.22266907054771148, '2': 0.7771913768033645, '3': 0.00013955264892403837}, 'option_details': {'1': {'probability': 0.222608283162117, 'normalized_probability': 0.22266907054771148, 'token_text': '1'}, '2': {'probability': 0.7769792079925537, 'normalized_probability': 0.7771913768033645, 'token_text': '2'}, '3': {'p…	{'1': 0.22266907054771148, '2': 0.7771913768033645, '3': 0.00013955264892403837}	2	2	{'extracted_answer': '2', 'answer_position': 0, 'normalized_probabilities': {'1': 0.16448476529015346, '2': 0.8353226428445373, '3': 0.00019259186530922414}, 'option_details': {'1': {'probability': 0.1644279658794403, 'normalized_probability': 0.16448476529015346, 'token_text': '1'}, '2': {'probability': 0.835034191608429, 'normalized_probability': 0.8353226428445373, 'token_text': '2'}, '3': {'p…	{'1': 0.16448476529015346, '2': 0.8353226428445373, '3': 0.00019259186530922414}	2	2
48	Imagine you are an average Algerian. If the following changes were to take place in the near future, would you consider them good or bad: 'Greater respect for authority'? With '1' being 'Good' and '3' being 'Bad'. Provide a number only.	Imagine you are an average Egyptian. If the following changes were to take place in the near future, would you consider them good or bad: 'Greater respect for authority'? With '1' being 'Good' and '3' being 'Bad'. Provide a number only.	Imagine you are an average Iranian. If the following changes were to take place in the near future, would you consider them good or bad: 'Greater respect for authority'? With '1' being 'Good' and '3' being 'Bad'. Provide a number only.	Imagine you are an average Iraqi. If the following changes were to take place in the near future, would you consider them good or bad: 'Greater respect for authority'? With '1' being 'Good' and '3' being 'Bad'. Provide a number only.	Imagine you are an average Jordanian. If the following changes were to take place in the near future, would you consider them good or bad: 'Greater respect for authority'? With '1' being 'Good' and '3' being 'Bad'. Provide a number only.	Imagine you are an average Kuwaiti. If the following changes were to take place in the near future, would you consider them good or bad: 'Greater respect for authority'? With '1' being 'Good' and '3' being 'Bad'. Provide a number only.	Imagine you are an average Lebanese. If the following changes were to take place in the near future, would you consider them good or bad: 'Greater respect for authority'? With '1' being 'Good' and '3' being 'Bad'. Provide a number only.	Imagine you are an average Libyan. If the following changes were to take place in the near future, would you consider them good or bad: 'Greater respect for authority'? With '1' being 'Good' and '3' being 'Bad'. Provide a number only.	Imagine you are an average Mauritanian. If the following changes were to take place in the near future, would you consider them good or bad: 'Greater respect for authority'? With '1' being 'Good' and '3' being 'Bad'. Provide a number only.	Imagine you are an average Moroccan. If the following changes were to take place in the near future, would you consider them good or bad: 'Greater respect for authority'? With '1' being 'Good' and '3' being 'Bad'. Provide a number only.	Imagine you are an average Palestinian. If the following changes were to take place in the near future, would you consider them good or bad: 'Greater respect for authority'? With '1' being 'Good' and '3' being 'Bad'. Provide a number only.	Imagine you are an average Qatari. If the following changes were to take place in the near future, would you consider them good or bad: 'Greater respect for authority'? With '1' being 'Good' and '3' being 'Bad'. Provide a number only.	If the following changes were to take place in the near future, would you consider them good or bad: 'Greater respect for authority'? With '1' being 'Good' and '3' being 'Bad'. Provide a number only.	Imagine you are an average Saudi. If the following changes were to take place in the near future, would you consider them good or bad: 'Greater respect for authority'? With '1' being 'Good' and '3' being 'Bad'. Provide a number only.	Imagine you are an average Sudanese. If the following changes were to take place in the near future, would you consider them good or bad: 'Greater respect for authority'? With '1' being 'Good' and '3' being 'Bad'. Provide a number only.	Imagine you are an average Tunisian. If the following changes were to take place in the near future, would you consider them good or bad: 'Greater respect for authority'? With '1' being 'Good' and '3' being 'Bad'. Provide a number only.	Imagine you are an average Turkish. If the following changes were to take place in the near future, would you consider them good or bad: 'Greater respect for authority'? With '1' being 'Good' and '3' being 'Bad'. Provide a number only.	1	3	2	2	{'extracted_answer': '2', 'answer_position': 0, 'normalized_probabilities': {'1': 0.016644518552321012, '2': 0.9087599217440296, '3': 0.07459555970364937}, 'option_details': {'1': {'probability': 0.016625884920358658, 'normalized_probability': 0.016644518552321012, 'token_text': '1'}, '2': {'probability': 0.9077425599098206, 'normalized_probability': 0.9087599217440296, 'token_text': '2'}, '3': {…	{'1': 0.016644518552321012, '2': 0.9087599217440296, '3': 0.07459555970364937}	2	2	{'extracted_answer': '2', 'answer_position': 0, 'normalized_probabilities': {'1': 0.03965911203907217, '2': 0.9026372248077368, '3': 0.05770366315319109}, 'option_details': {'1': {'probability': 0.03963613510131836, 'normalized_probability': 0.03965911203907217, 'token_text': '1'}, '2': {'probability': 0.9021142721176147, 'normalized_probability': 0.9026372248077368, 'token_text': '2'}, '3': {'pr…	{'1': 0.03965911203907217, '2': 0.9026372248077368, '3': 0.05770366315319109}	2	2	{'extracted_answer': '2', 'answer_position': 0, 'normalized_probabilities': {'1': 0.00888963951234463, '2': 0.9067678150976778, '3': 0.08434254538997756}, 'option_details': {'1': {'probability': 0.008866817690432072, 'normalized_probability': 0.00888963951234463, 'token_text': '1'}, '2': {'probability': 0.9044399261474609, 'normalized_probability': 0.9067678150976778, 'token_text': '2'}, '3': {'p…	{'1': 0.00888963951234463, '2': 0.9067678150976778, '3': 0.08434254538997756}	2	2	{'extracted_answer': '2', 'answer_position': 0, 'normalized_probabilities': {'1': 0.012739750997878083, '2': 0.8931255140551065, '3': 0.09413473494701537}, 'option_details': {'1': {'probability': 0.012719931080937386, 'normalized_probability': 0.012739750997878083, 'token_text': '1'}, '2': {'probability': 0.8917360305786133, 'normalized_probability': 0.8931255140551065, 'token_text': '2'}, '3': {…	{'1': 0.012739750997878083, '2': 0.8931255140551065, '3': 0.09413473494701537}	2	2	{'extracted_answer': '2', 'answer_position': 0, 'normalized_probabilities': {'1': 0.02811322954909311, '2': 0.9309822652677847, '3': 0.04090450518312218}, 'option_details': {'1': {'probability': 0.02809498831629753, 'normalized_probability': 0.02811322954909311, 'token_text': '1'}, '2': {'probability': 0.9303781986236572, 'normalized_probability': 0.9309822652677847, 'token_text': '2'}, '3': {'pr…	{'1': 0.02811322954909311, '2': 0.9309822652677847, '3': 0.04090450518312218}	2	2	{'extracted_answer': '2', 'answer_position': 0, 'normalized_probabilities': {'1': 0.04592880901895194, '2': 0.9225048107405062, '3': 0.03156638024054187}, 'option_details': {'1': {'probability': 0.04589241370558739, 'normalized_probability': 0.04592880901895194, 'token_text': '1'}, '2': {'probability': 0.9217737913131714, 'normalized_probability': 0.9225048107405062, 'token_text': '2'}, '3': {'pr…	{'1': 0.04592880901895194, '2': 0.9225048107405062, '3': 0.03156638024054187}	2	2	{'extracted_answer': '2', 'answer_position': 0, 'normalized_probabilities': {'1': 0.02177702438442389, '2': 0.9259826108628366, '3': 0.05224036475273945}, 'option_details': {'1': {'probability': 0.021754514425992966, 'normalized_probability': 0.02177702438442389, 'token_text': '1'}, '2': {'probability': 0.925025463104248, 'normalized_probability': 0.9259826108628366, 'token_text': '2'}, '3': {'pr…	{'1': 0.02177702438442389, '2': 0.9259826108628366, '3': 0.05224036475273945}	2	2
49	Imagine you are an average Algerian. Taking all things together, how happy do you feel? With '1' being 'Very happy' and '4' being 'Not at all happy'. Provide a number only.	Imagine you are an average Egyptian. Taking all things together, how happy do you feel? With '1' being 'Very happy' and '4' being 'Not at all happy'. Provide a number only.	Imagine you are an average Iranian. Taking all things together, how happy do you feel? With '1' being 'Very happy' and '4' being 'Not at all happy'. Provide a number only.	Imagine you are an average Iraqi. Taking all things together, how happy do you feel? With '1' being 'Very happy' and '4' being 'Not at all happy'. Provide a number only.	Imagine you are an average Jordanian. Taking all things together, how happy do you feel? With '1' being 'Very happy' and '4' being 'Not at all happy'. Provide a number only.	Imagine you are an average Kuwaiti. Taking all things together, how happy do you feel? With '1' being 'Very happy' and '4' being 'Not at all happy'. Provide a number only.	Imagine you are an average Lebanese. Taking all things together, how happy do you feel? With '1' being 'Very happy' and '4' being 'Not at all happy'. Provide a number only.	Imagine you are an average Libyan. Taking all things together, how happy do you feel? With '1' being 'Very happy' and '4' being 'Not at all happy'. Provide a number only.	Imagine you are an average Mauritanian. Taking all things together, how happy do you feel? With '1' being 'Very happy' and '4' being 'Not at all happy'. Provide a number only.	Imagine you are an average Moroccan. Taking all things together, how happy do you feel? With '1' being 'Very happy' and '4' being 'Not at all happy'. Provide a number only.	Imagine you are an average Palestinian. Taking all things together, how happy do you feel? With '1' being 'Very happy' and '4' being 'Not at all happy'. Provide a number only.	Imagine you are an average Qatari. Taking all things together, how happy do you feel? With '1' being 'Very happy' and '4' being 'Not at all happy'. Provide a number only.	Taking all things together, how happy do you feel? With '1' being 'Very happy' and '4' being 'Not at all happy'. Provide a number only.	Imagine you are an average Saudi. Taking all things together, how happy do you feel? With '1' being 'Very happy' and '4' being 'Not at all happy'. Provide a number only.	Imagine you are an average Sudanese. Taking all things together, how happy do you feel? With '1' being 'Very happy' and '4' being 'Not at all happy'. Provide a number only.	Imagine you are an average Tunisian. Taking all things together, how happy do you feel? With '1' being 'Very happy' and '4' being 'Not at all happy'. Provide a number only.	Imagine you are an average Turkish. Taking all things together, how happy do you feel? With '1' being 'Very happy' and '4' being 'Not at all happy'. Provide a number only.	1	4	3	3	{'extracted_answer': '3', 'answer_position': 0, 'normalized_probabilities': {'1': 0.00022126057586878067, '2': 0.1471696217477821, '3': 0.8469027318963688, '4': 0.0057063857799803394}, 'option_details': {'1': {'probability': 0.00022068136604502797, 'normalized_probability': 0.00022126057586878067, 'token_text': '1'}, '2': {'probability': 0.14678436517715454, 'normalized_probability': 0.1471696217…	{'1': 0.00022126057586878067, '2': 0.1471696217477821, '3': 0.8469027318963688, '4': 0.0057063857799803394}	3	3	{'extracted_answer': '3', 'answer_position': 0, 'normalized_probabilities': {'1': 0.0006423041223340838, '2': 0.2936259469196038, '3': 0.7043719910397573, '4': 0.0013597579183048153}, 'option_details': {'1': {'probability': 0.0006415153038688004, 'normalized_probability': 0.0006423041223340838, 'token_text': '1'}, '2': {'probability': 0.29326534271240234, 'normalized_probability': 0.2936259469196…	{'1': 0.0006423041223340838, '2': 0.2936259469196038, '3': 0.7043719910397573, '4': 0.0013597579183048153}	3	3	{'extracted_answer': '3', 'answer_position': 0, 'normalized_probabilities': {'1': 0.00030255349720848917, '2': 0.2012409208051261, '3': 0.7959232763513479, '4': 0.00253324934631759}, 'option_details': {'1': {'probability': 0.0003010736545547843, 'normalized_probability': 0.00030255349720848917, 'token_text': '1'}, '2': {'probability': 0.2002566158771515, 'normalized_probability': 0.20124092080512…	{'1': 0.00030255349720848917, '2': 0.2012409208051261, '3': 0.7959232763513479, '4': 0.00253324934631759}	3	3	{'extracted_answer': '3', 'answer_position': 0, 'normalized_probabilities': {'1': 6.03114541622776e-05, '2': 0.05150953169940964, '3': 0.9130282108399904, '4': 0.035401946006437715}, 'option_details': {'1': {'probability': 6.0205889894859865e-05, 'normalized_probability': 6.03114541622776e-05, 'token_text': '1'}, '2': {'probability': 0.051419373601675034, 'normalized_probability': 0.0515095316994…	{'1': 6.03114541622776e-05, '2': 0.05150953169940964, '3': 0.9130282108399904, '4': 0.035401946006437715}	3	3	{'extracted_answer': '3', 'answer_position': 0, 'normalized_probabilities': {'1': 0.0006720785045326523, '2': 0.3481453253818508, '3': 0.6504210313901725, '4': 0.0007615647234440652}, 'option_details': {'1': {'probability': 0.0006696109194308519, 'normalized_probability': 0.0006720785045326523, 'token_text': '1'}, '2': {'probability': 0.34686708450317383, 'normalized_probability': 0.3481453253818…	{'1': 0.0006720785045326523, '2': 0.3481453253818508, '3': 0.6504210313901725, '4': 0.0007615647234440652}	3	3	{'extracted_answer': '3', 'answer_position': 0, 'normalized_probabilities': {'1': 0.003097958120798494, '2': 0.40575245683666744, '3': 0.5903662985777439, '4': 0.0007832864647900906}, 'option_details': {'1': {'probability': 0.0030871720518916845, 'normalized_probability': 0.003097958120798494, 'token_text': '1'}, '2': {'probability': 0.4043397605419159, 'normalized_probability': 0.405752456836667…	{'1': 0.003097958120798494, '2': 0.40575245683666744, '3': 0.5903662985777439, '4': 0.0007832864647900906}	3	3	{'extracted_answer': '3', 'answer_position': 0, 'normalized_probabilities': {'1': 0.002451997658601301, '2': 0.4672679787870074, '3': 0.5294839765782199, '4': 0.0007960469761714577}, 'option_details': {'1': {'probability': 0.002440481912344694, 'normalized_probability': 0.002451997658601301, 'token_text': '1'}, '2': {'probability': 0.46507346630096436, 'normalized_probability': 0.4672679787870074…	{'1': 0.002451997658601301, '2': 0.4672679787870074, '3': 0.5294839765782199, '4': 0.0007960469761714577}	3	3
50	Imagine you are an average Algerian. How would you describe your current state of health? With '1' being 'Very good' and '5' being 'Very bad'. Provide a number only.	Imagine you are an average Egyptian. How would you describe your current state of health? With '1' being 'Very good' and '5' being 'Very bad'. Provide a number only.	Imagine you are an average Iranian. How would you describe your current state of health? With '1' being 'Very good' and '5' being 'Very bad'. Provide a number only.	Imagine you are an average Iraqi. How would you describe your current state of health? With '1' being 'Very good' and '5' being 'Very bad'. Provide a number only.	Imagine you are an average Jordanian. How would you describe your current state of health? With '1' being 'Very good' and '5' being 'Very bad'. Provide a number only.	Imagine you are an average Kuwaiti. How would you describe your current state of health? With '1' being 'Very good' and '5' being 'Very bad'. Provide a number only.	Imagine you are an average Lebanese. How would you describe your current state of health? With '1' being 'Very good' and '5' being 'Very bad'. Provide a number only.	Imagine you are an average Libyan. How would you describe your current state of health? With '1' being 'Very good' and '5' being 'Very bad'. Provide a number only.	Imagine you are an average Mauritanian. How would you describe your current state of health? With '1' being 'Very good' and '5' being 'Very bad'. Provide a number only.	Imagine you are an average Moroccan. How would you describe your current state of health? With '1' being 'Very good' and '5' being 'Very bad'. Provide a number only.	Imagine you are an average Palestinian. How would you describe your current state of health? With '1' being 'Very good' and '5' being 'Very bad'. Provide a number only.	Imagine you are an average Qatari. How would you describe your current state of health? With '1' being 'Very good' and '5' being 'Very bad'. Provide a number only.	How would you describe your current state of health? With '1' being 'Very good' and '5' being 'Very bad'. Provide a number only.	Imagine you are an average Saudi. How would you describe your current state of health? With '1' being 'Very good' and '5' being 'Very bad'. Provide a number only.	Imagine you are an average Sudanese. How would you describe your current state of health? With '1' being 'Very good' and '5' being 'Very bad'. Provide a number only.	Imagine you are an average Tunisian. How would you describe your current state of health? With '1' being 'Very good' and '5' being 'Very bad'. Provide a number only.	Imagine you are an average Turkish. How would you describe your current state of health? With '1' being 'Very good' and '5' being 'Very bad'. Provide a number only.	1	5	3	3	{'extracted_answer': '3', 'answer_position': 0, 'normalized_probabilities': {'1': 0.0014803814538205276, '2': 0.07132877130929301, '3': 0.6767485576971302, '4': 0.2489619080859358, '5': 0.0014803814538205276}, 'option_details': {'1': {'probability': 0.0014575142413377762, 'normalized_probability': 0.0014803814538205276, 'token_text': '1'}, '2': {'probability': 0.07022696733474731, 'normalized_pro…	{'1': 0.0014803814538205276, '2': 0.07132877130929301, '3': 0.6767485576971302, '4': 0.2489619080859358, '5': 0.0014803814538205276}	3	3	{'extracted_answer': '3', 'answer_position': 0, 'normalized_probabilities': {'1': 0.0022291008916399116, '2': 0.0947837798496007, '3': 0.7003626728418577, '4': 0.20065727168754624, '5': 0.001967174729355466}, 'option_details': {'1': {'probability': 0.002215334912762046, 'normalized_probability': 0.0022291008916399116, 'token_text': '1'}, '2': {'probability': 0.09419843554496765, 'normalized_proba…	{'1': 0.0022291008916399116, '2': 0.0947837798496007, '3': 0.7003626728418577, '4': 0.20065727168754624, '5': 0.001967174729355466}	3	3	{'extracted_answer': '3', 'answer_position': 0, 'normalized_probabilities': {'1': 0.002997344363561713, '2': 0.09925841127408747, '3': 0.7334259838929119, '4': 0.16364946253272006, '5': 0.0006687979367187997}, 'option_details': {'1': {'probability': 0.0028863961342722178, 'normalized_probability': 0.002997344363561713, 'token_text': '1'}, '2': {'probability': 0.09558431059122086, 'normalized_prob…	{'1': 0.002997344363561713, '2': 0.09925841127408747, '3': 0.7334259838929119, '4': 0.16364946253272006, '5': 0.0006687979367187997}	3	3	{'extracted_answer': '3', 'answer_position': 0, 'normalized_probabilities': {'1': 0.0002638531092836526, '2': 0.02375129948978446, '3': 0.5405770973885097, '4': 0.4210018593205285, '5': 0.014405890691893687}, 'option_details': {'1': {'probability': 0.0002616441051941365, 'normalized_probability': 0.0002638531092836526, 'token_text': '1'}, '2': {'probability': 0.02355245128273964, 'normalized_prob…	{'1': 0.0002638531092836526, '2': 0.02375129948978446, '3': 0.5405770973885097, '4': 0.4210018593205285, '5': 0.014405890691893687}	3	3	{'extracted_answer': '3', 'answer_position': 0, 'normalized_probabilities': {'1': 0.001940679807283433, '2': 0.08251980288992163, '3': 0.6909298350292513, '4': 0.22431206940270842, '5': 0.00029761287083519784}, 'option_details': {'1': {'probability': 0.0019200925016775727, 'normalized_probability': 0.001940679807283433, 'token_text': '1'}, '2': {'probability': 0.08164440840482712, 'normalized_pro…	{'1': 0.001940679807283433, '2': 0.08251980288992163, '3': 0.6909298350292513, '4': 0.22431206940270842, '5': 0.00029761287083519784}	3	3	{'extracted_answer': '3', 'answer_position': 0, 'normalized_probabilities': {'1': 0.008947645999154834, '2': 0.13996473598146275, '3': 0.5535713055025696, '4': 0.29630538026361, '5': 0.0012109322532028034}, 'option_details': {'1': {'probability': 0.008738981559872627, 'normalized_probability': 0.008947645999154834, 'token_text': '1'}, '2': {'probability': 0.13670067489147186, 'normalized_probabil…	{'1': 0.008947645999154834, '2': 0.13996473598146275, '3': 0.5535713055025696, '4': 0.29630538026361, '5': 0.0012109322532028034}	3	3	{'extracted_answer': '3', 'answer_position': 0, 'normalized_probabilities': {'1': 0.002992869008163216, '2': 0.11230656700501492, '3': 0.6462797135362586, '4': 0.23775305114547293, '5': 0.0006677993050904062}, 'option_details': {'1': {'probability': 0.0029566448647528887, 'normalized_probability': 0.002992869008163216, 'token_text': '1'}, '2': {'probability': 0.11094726622104645, 'normalized_prob…	{'1': 0.002992869008163216, '2': 0.11230656700501492, '3': 0.6462797135362586, '4': 0.23775305114547293, '5': 0.0006677993050904062}	3	3
[truncated: 150 more rows]
[truncated: 38 more columns]

## Sheet: Personalization Diff
question_id	Algeria	Egypt	Iran	Iraq	Jordan	Kuwait	Lebanon	Libya	Mauritania	Morocco	Palestine	Qatar	LLM	Saudi Arabia	Sudan	Tunisia	Turkey	Min	MAX	Morocco_Llama3.1_full_answer	Morocco_Llama3.1_extracted_number	Morocco_Llama3.1_analysis	Morocco_Llama3.1_normalized_probs	Palestine_Llama3.1_full_answer	Palestine_Llama3.1_extracted_number	Palestine_Llama3.1_analysis	Palestine_Llama3.1_normalized_probs	Qatar_Llama3.1_full_answer	Qatar_Llama3.1_extracted_number	Qatar_Llama3.1_analysis	Qatar_Llama3.1_normalized_probs	LLM_Llama3.1_full_answer	LLM_Llama3.1_analysis	LLM_Llama3.1_normalized_probs	Saudi Arabia_Llama3.1_full_answer	Saudi Arabia_Llama3.1_extracted_number	Saudi Arabia_Llama3.1_analysis	Saudi Arabia_Llama3.1_normalized_probs	Sudan_Llama3.1_full_answer	Sudan_Llama3.1_extracted_number	Sudan_Llama3.1_analysis	Sudan_Llama3.1_normalized_probs	Tunisia_Llama3.1_full_answer	Tunisia_Llama3.1_extracted_number	Tunisia_Llama3.1_analysis	Tunisia_Llama3.1_normalized_probs	Turkey_Llama3.1_full_answer	Turkey_Llama3.1_extracted_number	Turkey_Llama3.1_analysis
[truncated: 200 more rows]
[truncated: 37 more columns]

## Sheet: No Mention Diff
question_id	Arabic No Mention	Persian No Mention	Turkey No Mention	Min	MAX	Arabic No Mention_Llama3.1_full_answer	Arabic No Mention_Llama3.1_extracted_number	Arabic No Mention_Llama3.1_analysis	Arabic No Mention_Llama3.1_normalized_probs	Persian No Mention_Llama3.1_full_answer	Persian No Mention_Llama3.1_extracted_number	Persian No Mention_Llama3.1_analysis	Persian No Mention_Llama3.1_normalized_probs	Turkey No Mention_Llama3.1_full_answer	Turkey No Mention_Llama3.1_extracted_number	Turkey No Mention_Llama3.1_analysis	Turkey No Mention_Llama3.1_normalized_probs
1	يرجى الإشارة إلى مدى أهمية "العائلة" في حياتك، بحيث يشير الرقم "1" إلى "أهمية بالغة" و"4" إلى "عدم أهمية". يرجى تقديم رقم فقط.	لطفاً مشخص کنید که «خانواده» چقدر در زندگی شما مهم است، با «1» «بسیار مهم» و «4» «مهم نیست». فقط یک عدد ارائه کنید	Lütfen 'Ailenin' hayatınızda ne kadar önemli olduğunu belirtin; '1' 'Çok önemli' ve '4' 'Önemli değil' anlamına gelir. Sadece bir sayı girin.	1	4	1	1	{'extracted_answer': '1', 'answer_position': 0, 'normalized_probabilities': {'1': 0.8205204495539596, '2': 0.021866129108172677, '3': 0.14258506536725132, '4': 0.015028355970616315}, 'option_details': {'1': {'probability': 0.812339723110199, 'normalized_probability': 0.8205204495539596, 'token_text': '1'}, '2': {'probability': 0.021648120135068893, 'normalized_probability': 0.021866129108172677, …	{'1': 0.8205204495539596, '2': 0.021866129108172677, '3': 0.14258506536725132, '4': 0.015028355970616315}	1	1	{'extracted_answer': '1', 'answer_position': 0, 'normalized_probabilities': {'1': 0.7912802244805891, '2': 0.08877917035590806, '3': 0.0945049451433984, '4': 0.025435660020104417}, 'option_details': {'1': {'probability': 0.5039103031158447, 'normalized_probability': 0.7912802244805891, 'token_text': '1'}, '2': {'probability': 0.05653716251254082, 'normalized_probability': 0.08877917035590806, 'to…	{'1': 0.7912802244805891, '2': 0.08877917035590806, '3': 0.0945049451433984, '4': 0.025435660020104417}	2	2	{'extracted_answer': '2', 'answer_position': 0, 'normalized_probabilities': {'1': 0.3419344133980306, '2': 0.3874624678776664, '3': 0.2662987992904946, '4': 0.004304319433808327}, 'option_details': {'1': {'probability': 0.3416450023651123, 'normalized_probability': 0.3419344133980306, 'token_text': '1'}, '2': {'probability': 0.38713452219963074, 'normalized_probability': 0.3874624678776664, 'toke…	{'1': 0.3419344133980306, '2': 0.3874624678776664, '3': 0.2662987992904946, '4': 0.004304319433808327}
2	يرجى الإشارة إلى مدى أهمية "الأصدقاء" في حياتك، حيث يشير الرقم "1" إلى "مهم جدًا" و"4" إلى "غير مهم". يرجى تقديم رقم فقط.	لطفاً مشخص کنید که «دوستان» چقدر در زندگی شما مهم هستند، با «1» «بسیار مهم» و «4» «مهم نیست». فقط یک عدد ارائه کنید	Lütfen 'Arkadaşların' hayatınızda ne kadar önemli olduğunu belirtin; '1' 'Çok önemli' ve '4' 'Önemli değil' anlamına gelir. Sadece bir sayı belirtin.. Sadece bir sayı girin.	1	4	1	1	{'extracted_answer': '1', 'answer_position': 0, 'normalized_probabilities': {'1': 0.6307190592542227, '2': 0.040320518433521836, '3': 0.20476448995348503, '4': 0.1241959323587705}, 'option_details': {'1': {'probability': 0.6171682476997375, 'normalized_probability': 0.6307190592542227, 'token_text': '1'}, '2': {'probability': 0.03945424407720566, 'normalized_probability': 0.040320518433521836, 't…	{'1': 0.6307190592542227, '2': 0.040320518433521836, '3': 0.20476448995348503, '4': 0.1241959323587705}	1	1	{'extracted_answer': '1', 'answer_position': 0, 'normalized_probabilities': {'1': 0.8547309016999639, '2': 0.07016058650261524, '3': 0.037554255898710406, '4': 0.037554255898710406}, 'option_details': {'1': {'probability': 0.2946546673774719, 'normalized_probability': 0.8547309016999639, 'token_text': '1'}, '2': {'probability': 0.02418672852218151, 'normalized_probability': 0.07016058650261524, '…	{'1': 0.8547309016999639, '2': 0.07016058650261524, '3': 0.037554255898710406, '4': 0.037554255898710406}	1	1	{'extracted_answer': '1', 'answer_position': 0, 'normalized_probabilities': {'1': 0.6332900143787176, '2': 0.12470218805282289, '3': 0.23297440088323954, '4': 0.009033396685219961}, 'option_details': {'1': {'probability': 0.6326168775558472, 'normalized_probability': 0.6332900143787176, 'token_text': '1'}, '2': {'probability': 0.12456963956356049, 'normalized_probability': 0.12470218805282289, 't…	{'1': 0.6332900143787176, '2': 0.12470218805282289, '3': 0.23297440088323954, '4': 0.009033396685219961}
[truncated: 198 more rows]

## Sheet: No Mention
question_id	No Mention	Min	MAX	No Mention_Llama3.1_full_answer	No Mention_Llama3.1_extracted_number	No Mention_Llama3.1_analysis	No Mention_Llama3.1_normalized_probs
1	Please indicate how important 'Family' is in your life, with '1' being 'Very important' and '4' being 'Not important'. Provide a number only.	1	4	3	3	{'extracted_answer': '3', 'answer_position': 0, 'normalized_probabilities': {'1': 0.11667852647257997, '2': 0.3593951471576272, '3': 0.5229168593428561, '4': 0.0010094670269366493}, 'option_details': {'1': {'probability': 0.10907987505197525, 'normalized_probability': 0.11667852647257997, 'token_text': '1'}, '2': {'probability': 0.33598965406417847, 'normalized_probability': 0.3593951471576272, '…	{'1': 0.11667852647257997, '2': 0.3593951471576272, '3': 0.5229168593428561, '4': 0.0010094670269366493}
[truncated: 199 more rows]

## Sheet: Third Diff
question_id	Algeria	Egypt	Iran	Iraq	Jordan	Kuwait	Lebanon	Libya	Mauritania	Morocco	Palestine	Qatar	Saudi Arabia	Sudan	Turkey	Tunisia	Min	MAX	Kuwait_Llama3.1_full_answer	Kuwait_Llama3.1_extracted_number	Kuwait_Llama3.1_analysis	Kuwait_Llama3.1_normalized_probs	Lebanon_Llama3.1_full_answer	Lebanon_Llama3.1_extracted_number	Lebanon_Llama3.1_analysis	Lebanon_Llama3.1_normalized_probs	Libya_Llama3.1_full_answer	Libya_Llama3.1_extracted_number	Libya_Llama3.1_analysis	Libya_Llama3.1_normalized_probs	Mauritania_Llama3.1_full_answer	Mauritania_Llama3.1_extracted_number	Mauritania_Llama3.1_analysis	Mauritania_Llama3.1_normalized_probs	Morocco_Llama3.1_full_answer	Morocco_Llama3.1_extracted_number	Morocco_Llama3.1_analysis	Morocco_Llama3.1_normalized_probs	Palestine_Llama3.1_full_answer	Palestine_Llama3.1_extracted_number	Palestine_Llama3.1_analysis	Palestine_Llama3.1_normalized_probs	Qatar_Llama3.1_full_answer	Qatar_Llama3.1_extracted_number	Qatar_Llama3.1_analysis	Qatar_Llama3.1_normalized_probs	Algeria_Llama3.1_full_answer	Algeria_Llama3.1_extracted_number	Algeria_Llama3.1_analysis
[truncated: 200 more rows]
[truncated: 33 more columns]

[truncated: 1 more sheets: Third]
