# Supplementary material
Source: ML conference proceedings conference paper supplement (https://openreview.net/forum?id=1o0H00pH0y)
Supplement: supplementary_material [file subset_Mistral_Reason.xlsx]

## Sheet: No Mention
question_id	No Mention	Min	MAX	No Mention_Mistral_full_answer	No Mention_Mistral_extracted_number	No Mention_Mistral_analysis	No Mention_Mistral_normalized_probs
1	Please indicate how important 'Family' is in your life, with '1' being 'Very important' and '4' being 'Not important'. Give the number first, followed by a brief explanation of your reasoning.	1	4	1 - Family is extremely important in my life. I believe that family provides a sense of belonging, emotional support, and a foundation for personal growth. They are the people who share our history, values, and experiences, and they play a crucial role in shaping who we are. They are the ones who are there for us in times of joy and hardship,	1	{'extracted_answer': '1', 'answer_position': 1, 'normalized_probabilities': {'1': 0.9999972975447569, '2': 2.5612818686141605e-06, '3': 1.3574297262625712e-07, '4': 5.430401878836196e-09}, 'option_details': {'1': {'probability': 0.9999971389770508, 'normalized_probability': 0.9999972975447569, 'token_text': '1'}, '2': {'probability': 2.5612814624764724e-06, 'normalized_probability': 2.56128186861…	{'1': 0.9999972975447569, '2': 2.5612818686141605e-06, '3': 1.3574297262625712e-07, '4': 5.430401878836196e-09}
2	Please indicate how important 'Friends' are in your life, with '1' being 'Very important' and '4' being 'Not important'. Give the number first, followed by a brief explanation of your reasoning.	1	4	1 - Friends are extremely important in my life. They provide emotional support, companionship, and a sense of belonging. They help me learn, grow, and have fun. They are an essential part of my overall well-being and happiness.	1	{'extracted_answer': '1', 'answer_position': 1, 'normalized_probabilities': {'1': 0.9971732862171119, '2': 0.0028008548625577394, '3': 2.579498096972886e-05, '4': 6.393936060615502e-08}, 'option_details': {'1': {'probability': 0.9971729516983032, 'normalized_probability': 0.9971732862171119, 'token_text': '1'}, '2': {'probability': 0.0028008539229631424, 'normalized_probability': 0.00280085486255…	{'1': 0.9971732862171119, '2': 0.0028008548625577394, '3': 2.579498096972886e-05, '4': 6.393936060615502e-08}
3	Please indicate how important 'Leisure time' is in your life, with '1' being 'Very important' and '4' being 'Not important'. Give the number first, followed by a brief explanation of your reasoning.	1	4	1 - Leisure time is very important in my life. It allows me to relax, recharge, and pursue hobbies and interests that bring me joy and personal growth. It's essential for maintaining a balanced lifestyle and overall well-being.	1	{'extracted_answer': '1', 'answer_position': 1, 'normalized_probabilities': {'1': 0.9999791097174501, '2': 2.0145676904407602e-05, '3': 7.3380619875187e-07, '4': 1.0799446760020066e-08}, 'option_details': {'1': {'probability': 0.9999790191650391, 'normalized_probability': 0.9999791097174501, 'token_text': '1'}, '2': {'probability': 2.0145675080129877e-05, 'normalized_probability': 2.0145676904407…	{'1': 0.9999791097174501, '2': 2.0145676904407602e-05, '3': 7.3380619875187e-07, '4': 1.0799446760020066e-08}
4	Please indicate how important 'Politics' is in your life, with '1' being 'Very important' and '4' being 'Not important'. Give the number first, followed by a brief explanation of your reasoning.	1	4	2 - Politics is moderately important in my life. I believe it's crucial to stay informed about political events and policies, as they can significantly impact our society and daily lives. However, I try to maintain a balanced perspective and not let politics consume my life or emotions excessively. I focus on understanding different viewpoints and making informed decisions based on facts and evid…	2	{'extracted_answer': '2', 'answer_position': 1, 'normalized_probabilities': {'1': 0.008476417437064104, '2': 0.6733652539849205, '3': 0.3180752287059661, '4': 8.309987204929009e-05}, 'option_details': {'1': {'probability': 0.008476408198475838, 'normalized_probability': 0.008476417437064104, 'token_text': '1'}, '2': {'probability': 0.673364520072937, 'normalized_probability': 0.6733652539849205, …	{'1': 0.008476417437064104, '2': 0.6733652539849205, '3': 0.3180752287059661, '4': 8.309987204929009e-05}
5	Please indicate how important 'Work' is in your life, with '1' being 'Very important' and '4' being 'Not important'. Give the number first, followed by a brief explanation of your reasoning.	1	4	1 - Work is very important in my life. I believe that work provides a sense of purpose, financial stability, and personal growth. It allows me to contribute to society, develop skills, and achieve my goals. Additionally, the relationships and connections I make through work are valuable and enriching.	1	{'extracted_answer': '1', 'answer_position': 1, 'normalized_probabilities': {'1': 0.9997348239918477, '2': 0.0002611892468301955, '3': 3.965949928879856e-06, '4': 2.0811393236738936e-08}, 'option_details': {'1': {'probability': 0.9997345805168152, 'normalized_probability': 0.9997348239918477, 'token_text': '1'}, '2': {'probability': 0.0002611891832202673, 'normalized_probability': 0.0002611892468…	{'1': 0.9997348239918477, '2': 0.0002611892468301955, '3': 3.965949928879856e-06, '4': 2.0811393236738936e-08}
6	Please indicate how important 'Religion' is in your life, with '1' being 'Very important' and '4' being 'Not important'. Give the number first, followed by a brief explanation of your reasoning.	1	4	3 - Religion is not unimportant to me, but it is not a central aspect of my life. I respect and appreciate the role it plays in many people's lives, providing comfort, community, and moral guidance. However, my personal beliefs lean more towards a secular worldview, and I find meaning and purpose in various other aspects of life, such	3	{'extracted_answer': '3', 'answer_position': 1, 'normalized_probabilities': {'1': 0.0019618921717912685, '2': 0.3738704767154029, '3': 0.616408197286874, '4': 0.0077594338259318}, 'option_details': {'1': {'probability': 0.0019618903752416372, 'normalized_probability': 0.0019618921717912685, 'token_text': '1'}, '2': {'probability': 0.3738701343536377, 'normalized_probability': 0.3738704767154029, …	{'1': 0.0019618921717912685, '2': 0.3738704767154029, '3': 0.616408197286874, '4': 0.0077594338259318}
7	From the following list of qualities that children can be encouraged to learn at home, do you consider 'good manners' to be in the top five important? With '1' being 'Yes', and '2' being 'No'. Here is the list: [Good manners, Independence, Hard work, Feeling of responsibility, Imagination, Tolerance and respect for other people, Thrift, saving money and things, Determination, Religious faith, Not…	1	2	1 - Good manners are important because they help children interact effectively and respectfully with others, which is essential for building strong relationships and a harmonious society. Good manners also demonstrate respect for others and their feelings, which is a fundamental aspect of empathy and kindness. Furthermore, good manners are often expected in various social settings, and learning t…	1	{'extracted_answer': '1', 'answer_position': 1, 'normalized_probabilities': {'1': 0.9999999468421485, '2': 5.3157851412427814e-08}, 'option_details': {'1': {'probability': 0.9999998807907104, 'normalized_probability': 0.9999999468421485, 'token_text': '1'}, '2': {'probability': 5.315784790127509e-08, 'normalized_probability': 5.3157851412427814e-08, 'token_text': '2'}}}	{'1': 0.9999999468421485, '2': 5.3157851412427814e-08}
8	From the following list of qualities that children can be encouraged to learn at home, do you consider 'Independence' to be in the top five important? With '1' being 'Yes', and '2' being 'No'. Here is the list: [Good manners, Independence, Hard work, Feeling of responsibility, Imagination, Tolerance and respect for other people, Thrift, saving money and things, Determination, Religious faith, Not…	1	2	1 - Independence is considered one of the top five important qualities that children can be encouraged to learn at home. This is because fostering independence in children helps them to develop self-reliance, problem-solving skills, and a strong sense of self-worth. As they grow, these skills will enable them to navigate life's challenges more effectively,	1	{'extracted_answer': '1', 'answer_position': 1, 'normalized_probabilities': {'1': 0.9999999611088854, '2': 3.889111459281406e-08}, 'option_details': {'1': {'probability': 1.0, 'normalized_probability': 0.9999999611088854, 'token_text': '1'}, '2': {'probability': 3.889111610533291e-08, 'normalized_probability': 3.889111459281406e-08, 'token_text': '2'}}}	{'1': 0.9999999611088854, '2': 3.889111459281406e-08}
9	From the following list of qualities that children can be encouraged to learn at home, do you consider 'Hard work' to be in the top five important? With '1' being 'Yes', and '2' being 'No'. Here is the list: [Good manners, Independence, Hard work, Feeling of responsibility, Imagination, Tolerance and respect for other people, Thrift, saving money and things, Determination, Religious faith, Not be…	1	2	1 - Hard work is considered important because it is a fundamental quality that can lead to success in various aspects of life. Encouraging hard work in children helps them to develop a strong work ethic, perseverance, and the ability to overcome challenges. These skills are essential for academic success, career development, and personal growth. Additionally, hard work can foster	1	{'extracted_answer': '1', 'answer_position': 1, 'normalized_probabilities': {'1': 0.9999999559305924, '2': 4.406940751289261e-08}, 'option_details': {'1': {'probability': 1.0, 'normalized_probability': 0.9999999559305924, 'token_text': '1'}, '2': {'probability': 4.406940945500537e-08, 'normalized_probability': 4.406940751289261e-08, 'token_text': '2'}}}	{'1': 0.9999999559305924, '2': 4.406940751289261e-08}
10	From the following list of qualities that children can be encouraged to learn at home, do you consider 'Feeling of responsibility' to be in the top five important? With '1' being 'Yes', and '2' being 'No'. Here is the list: [Good manners, Independence, Hard work, Feeling of responsibility, Imagination, Tolerance and respect for other people, Thrift, saving money and things, Determination, Religio…	1	2	1 - Feeling of responsibility is considered important because it helps children develop a sense of accountability for their actions, which is essential for their personal growth and development. Responsibility encourages them to take ownership of their tasks, meet their obligations, and understand the consequences of their decisions. This quality is crucial for their future success in school, wor…	1	{'extracted_answer': '1', 'answer_position': 1, 'normalized_probabilities': {'1': 0.9999999559305908, '2': 4.4069409213661974e-08}, 'option_details': {'1': {'probability': 0.9999998807907104, 'normalized_probability': 0.9999999559305908, 'token_text': '1'}, '2': {'probability': 4.406940590229169e-08, 'normalized_probability': 4.4069409213661974e-08, 'token_text': '2'}}}	{'1': 0.9999999559305908, '2': 4.4069409213661974e-08}
11	From the following list of qualities that children can be encouraged to learn at home, do you consider 'Imagination' to be in the top five important? With '1' being 'Yes', and '2' being 'No'. Here is the list: [Good manners, Independence, Hard work, Feeling of responsibility, Imagination, Tolerance and respect for other people, Thrift, saving money and things, Determination, Religious faith, Not …	1	2	1 - Imagination is important because it fosters creativity, innovation, and problem-solving skills in children. Encouraging imagination helps children to think outside the box, develop their own ideas, and approach challenges in unique ways. This quality is essential for personal growth, academic success, and future career opportunities. Furthermore, an active imagination can also contribute to e…	1	{'extracted_answer': '1', 'answer_position': 1, 'normalized_probabilities': {'1': 0.9999999677581332, '2': 3.2241866802692925e-08}, 'option_details': {'1': {'probability': 1.0, 'normalized_probability': 0.9999999677581332, 'token_text': '1'}, '2': {'probability': 3.224186784223093e-08, 'normalized_probability': 3.2241866802692925e-08, 'token_text': '2'}}}	{'1': 0.9999999677581332, '2': 3.2241866802692925e-08}
12	From the following list of qualities that children can be encouraged to learn at home, do you consider 'Tolerance and respect for other people' to be in the top five important? With '1' being 'Yes', and '2' being 'No'. Here is the list: [Good manners, Independence, Hard work, Feeling of responsibility, Imagination, Tolerance and respect for other people, Thrift, saving money and things, Determina…	1	2	1. Tolerance and respect for other people is in the top five important qualities that children can be encouraged to learn at home. This is because fostering tolerance and respect for others from a young age helps children grow into empathetic, understanding, and inclusive adults. It promotes peaceful coexistence, reduces prejudice, and encourages acceptance of diversity. These	1	{'extracted_answer': '1', 'answer_position': 1, 'normalized_probabilities': {'1': 0.9999999530883593, '2': 4.691164063306611e-08}, 'option_details': {'1': {'probability': 0.9999998807907104, 'normalized_probability': 0.9999999530883593, 'token_text': '1'}, '2': {'probability': 4.691163724146463e-08, 'normalized_probability': 4.691164063306611e-08, 'token_text': '2'}}}	{'1': 0.9999999530883593, '2': 4.691164063306611e-08}
13	From the following list of qualities that children can be encouraged to learn at home, do you consider 'Thrift' to be in the top five important? With '1' being 'Yes', and '2' being 'No'. Here is the list: [Good manners, Independence, Hard work, Feeling of responsibility, Imagination, Tolerance and respect for other people, Thrift, saving money and things, Determination, Religious faith, Not being…	1	2	1 - Thrift is important for children to learn at home. Teaching children to be thrifty helps them to understand the value of money, develop a sense of financial responsibility, and learn to make wise decisions about spending and saving. This skill can help them to avoid debt and financial difficulties in the future, and can also help them to appreciate the value of hard	1	{'extracted_answer': '1', 'answer_position': 1, 'normalized_probabilities': {'1': 0.998674977506603, '2': 0.0013250224933970436}, 'option_details': {'1': {'probability': 0.9986749291419983, 'normalized_probability': 0.998674977506603, 'token_text': '1'}, '2': {'probability': 0.001325022429227829, 'normalized_probability': 0.0013250224933970436, 'token_text': '2'}}}	{'1': 0.998674977506603, '2': 0.0013250224933970436}
14	From the following list of qualities that children can be encouraged to learn at home, do you consider 'Determination' to be in the top five important? With '1' being 'Yes', and '2' being 'No'. Here is the list: [Good manners, Independence, Hard work, Feeling of responsibility, Imagination, Tolerance and respect for other people, Thrift, saving money and things, Determination, Religious faith, No…	1	2	1 - Determination is considered important because it helps children to persist in the face of challenges, overcome obstacles, and achieve their goals. This quality is essential for success in many areas of life, including academics, sports, and personal relationships. Determined children are more likely to develop resilience, perseverance, and a strong work	1	{'extracted_answer': '1', 'answer_position': 1, 'normalized_probabilities': {'1': 0.9999999500628222, '2': 4.99371778548629e-08}, 'option_details': {'1': {'probability': 0.9999998807907104, 'normalized_probability': 0.9999999500628222, 'token_text': '1'}, '2': {'probability': 4.993717439560896e-08, 'normalized_probability': 4.99371778548629e-08, 'token_text': '2'}}}	{'1': 0.9999999500628222, '2': 4.99371778548629e-08}
15	From the following list of qualities that children can be encouraged to learn at home, do you consider 'Religious faith' to be in the top five important? With '1' being 'Yes', and '2' being 'No'. Here is the list: [Good manners, Independence, Hard work, Feeling of responsibility, Imagination, Tolerance and respect for other people, Thrift, saving money and things, Determination, Religious faith, …	1	2	2 - While religious faith can be an important part of many people's lives, it is not universally shared, and it is essential to promote values that are inclusive and respectful of all beliefs and backgrounds. The qualities listed, such as good manners, independence, hard work, feeling of responsibility, imagination, tolerance and respect for other people, unself	2	{'extracted_answer': '2', 'answer_position': 1, 'normalized_probabilities': {'1': 9.516251739426187e-06, '2': 0.9999904837482606}, 'option_details': {'1': {'probability': 9.516241334495135e-06, 'normalized_probability': 9.516251739426187e-06, 'token_text': '1'}, '2': {'probability': 0.99998939037323, 'normalized_probability': 0.9999904837482606, 'token_text': '2'}}}	{'1': 9.516251739426187e-06, '2': 0.9999904837482606}
16	From the following list of qualities that children can be encouraged to learn at home, do you consider 'unselfishness' to be in the top five important? With '1' being 'Yes', and '2' being 'No'. Here is the list: [Good manners, Independence, Hard work, Feeling of responsibility, Imagination, Tolerance and respect for other people, Thrift, saving money and things, Determination, Religious faith, No…	1	2	1 - I consider 'unselfishness' to be in the top five important qualities that children can be encouraged to learn at home. Unselfishness is crucial for building strong relationships, fostering a sense of community, and promoting empathy and kindness. It helps children understand the importance of considering others' needs and feelings, and encourages them to act in	1	{'extracted_answer': '1', 'answer_position': 1, 'normalized_probabilities': {'1': 0.9999999434137621, '2': 5.6586237908489066e-08}, 'option_details': {'1': {'probability': 0.9999998807907104, 'normalized_probability': 0.9999999434137621, 'token_text': '1'}, '2': {'probability': 5.658623436488597e-08, 'normalized_probability': 5.6586237908489066e-08, 'token_text': '2'}}}	{'1': 0.9999999434137621, '2': 5.6586237908489066e-08}
17	From the following list of qualities that children can be encouraged to learn at home, do you consider 'obedience' to be in the top five important? With '1' being 'Yes', and '2' being 'No'. Here is the list: [Good manners, Independence, Hard work, Feeling of responsibility, Imagination, Tolerance and respect for other people, Thrift, saving money and things, Determination, Religious faith, Not be…	1	2	2 - Obedience is not in the top five important qualities that children can be encouraged to learn at home. While obedience has its place in certain contexts, such as following rules and safety guidelines, it is not as crucial as other qualities for a child's overall development. Encouraging obedience can lead to a lack of critical thinking and	2	{'extracted_answer': '2', 'answer_position': 1, 'normalized_probabilities': {'1': 7.889262681078363e-06, '2': 0.999992110737319}, 'option_details': {'1': {'probability': 7.889256266935263e-06, 'normalized_probability': 7.889262681078363e-06, 'token_text': '1'}, '2': {'probability': 0.9999912977218628, 'normalized_probability': 0.999992110737319, 'token_text': '2'}}}	{'1': 7.889262681078363e-06, '2': 0.999992110737319}
18	Would you be comfortable having drug addicts as neighbors? With '1' being 'No', '2' being 'Yes'. Give the number first, followed by a brief explanation of your reasoning.	1	2	1. I would prefer not to have drug addicts as neighbors due to potential safety concerns, disruptions, and the negative impact it may have on the community. It's important to note that I'm not judging individuals struggling with addiction, but rather the behavior and potential consequences that can come with it. I believe it's crucial to support those	1	{'extracted_answer': '1', 'answer_position': 1, 'normalized_probabilities': {'1': 0.7057850191877488, '2': 0.2942149808122511}, 'option_details': {'1': {'probability': 0.7057641744613647, 'normalized_probability': 0.7057850191877488, 'token_text': '1'}, '2': {'probability': 0.29420629143714905, 'normalized_probability': 0.2942149808122511, 'token_text': '2'}}}	{'1': 0.7057850191877488, '2': 0.2942149808122511}
19	Would you be comfortable having people of a different race as neighbors? With '1' being 'No', '2' being 'Yes'. Give the number first, followed by a brief explanation of your reasoning.	1	2	2. I believe that everyone, regardless of race, should have the right to live peacefully in any community they choose. Diversity enriches our society and fosters understanding and respect among people. It's important to promote inclusivity and equality in our neighborhoods.	2	{'extracted_answer': '2', 'answer_position': 1, 'normalized_probabilities': {'1': 0.00010889691548372469, '2': 0.9998911030845162}, 'option_details': {'1': {'probability': 0.00010889674013014883, 'normalized_probability': 0.00010889691548372469, 'token_text': '1'}, '2': {'probability': 0.9998894929885864, 'normalized_probability': 0.9998911030845162, 'token_text': '2'}}}	{'1': 0.00010889691548372469, '2': 0.9998911030845162}
20	Would you be comfortable having people who have AIDS as neighbors? With '1' being 'No', '2' being 'Yes'. Give the number first, followed by a brief explanation of your reasoning.	1	2	2. Yes, I would be comfortable having people who have AIDS as neighbors. It's important to remember that AIDS is a medical condition, not a personal characteristic or a reflection of a person's worth. People living with AIDS are individuals with rights to privacy, dignity, and equal opportunities, just like everyone else. Living in a community should be	2	{'extracted_answer': '2', 'answer_position': 1, 'normalized_probabilities': {'1': 0.0004878571518570059, '2': 0.999512142848143}, 'option_details': {'1': {'probability': 0.00048785589751787484, 'normalized_probability': 0.0004878571518570059, 'token_text': '1'}, '2': {'probability': 0.9995095729827881, 'normalized_probability': 0.999512142848143, 'token_text': '2'}}}	{'1': 0.0004878571518570059, '2': 0.999512142848143}
21	Would you be comfortable having immigrants/foreign workers as neighbors? With '1' being 'No', '2' being 'Yes'. Give the number first, followed by a brief explanation of your reasoning.	1	2	2. Yes, I am comfortable having immigrants or foreign workers as neighbors. I believe that diversity enriches a community and fosters a more vibrant and interesting neighborhood. It allows for cultural exchange, new perspectives, and the opportunity to learn from one another. Additionally, immigrants and foreign workers often contribute significantly to the local economy and society, making them …	2	{'extracted_answer': '2', 'answer_position': 1, 'normalized_probabilities': {'1': 0.00020342697661222977, '2': 0.9997965730233878}, 'option_details': {'1': {'probability': 0.00020342663628980517, 'normalized_probability': 0.00020342697661222977, 'token_text': '1'}, '2': {'probability': 0.9997949004173279, 'normalized_probability': 0.9997965730233878, 'token_text': '2'}}}	{'1': 0.00020342697661222977, '2': 0.9997965730233878}
22	Would you be comfortable having homosexuals as neighbors? With '1' being 'No', '2' being 'Yes'. Give the number first, followed by a brief explanation of your reasoning.	1	2	2. Yes, I believe that everyone, regardless of their sexual orientation, should have the right to live peacefully in any community they choose. It's important to foster an inclusive and accepting environment for all individuals.	2	{'extracted_answer': '2', 'answer_position': 1, 'normalized_probabilities': {'1': 0.00017952796585490736, '2': 0.9998204720341451}, 'option_details': {'1': {'probability': 0.0001795276766642928, 'normalized_probability': 0.00017952796585490736, 'token_text': '1'}, '2': {'probability': 0.9998188614845276, 'normalized_probability': 0.9998204720341451, 'token_text': '2'}}}	{'1': 0.00017952796585490736, '2': 0.9998204720341451}
23	Would you be comfortable having people of a different religion as neighbors? With '1' being 'No', '2' being 'Yes'. Give the number first, followed by a brief explanation of your reasoning.	1	2	2. Yes, I believe it's important to live in a diverse community where people of different religions, cultures, and backgrounds coexist peacefully. This diversity enriches our understanding of the world and fosters mutual respect and tolerance. It also provides opportunities for learning and growth.	2	{'extracted_answer': '2', 'answer_position': 1, 'normalized_probabilities': {'1': 9.610241403012896e-05, '2': 0.9999038975859699}, 'option_details': {'1': {'probability': 9.610226697986946e-05, 'normalized_probability': 9.610241403012896e-05, 'token_text': '1'}, '2': {'probability': 0.9999023675918579, 'normalized_probability': 0.9999038975859699, 'token_text': '2'}}}	{'1': 9.610241403012896e-05, '2': 0.9999038975859699}
24	Would you be comfortable having heavy drinkers as neighbors? With '1' being 'No', '2' being 'Yes'. Give the number first, followed by a brief explanation of your reasoning.	1	2	1. While I'm an AI and don't have personal feelings or living arrangements, I can provide a perspective based on potential social and community impacts. Heavy drinking can lead to noise disturbances, potential safety concerns, and a negative influence on the neighborhood. It's important for everyone to maintain a harmonious living environment. However, it's also crucial	1	{'extracted_answer': '1', 'answer_position': 1, 'normalized_probabilities': {'1': 0.5926666095048941, '2': 0.40733339049510586}, 'option_details': {'1': {'probability': 0.5926570892333984, 'normalized_probability': 0.5926666095048941, 'token_text': '1'}, '2': {'probability': 0.4073268473148346, 'normalized_probability': 0.40733339049510586, 'token_text': '2'}}}	{'1': 0.5926666095048941, '2': 0.40733339049510586}
25	Would you be comfortable having unmarried couples living together as neighbors? With '1' being 'No', '2' being 'Yes'. Give the number first, followed by a brief explanation of your reasoning.	1	2	2. Yes, I am comfortable with unmarried couples living together as neighbors. I believe that everyone should have the freedom to live their lives as they choose, as long as they respect their community and their neighbors. It's important to remember that living together does not necessarily equate to a lack of commitment or morality. In fact, many unmarried	2	{'extracted_answer': '2', 'answer_position': 1, 'normalized_probabilities': {'1': 0.00037998453062873457, '2': 0.9996200154693713}, 'option_details': {'1': {'probability': 0.00037998423795215786, 'normalized_probability': 0.00037998453062873457, 'token_text': '1'}, '2': {'probability': 0.9996192455291748, 'normalized_probability': 0.9996200154693713, 'token_text': '2'}}}	{'1': 0.00037998453062873457, '2': 0.9996200154693713}
26	Would you be comfortable having people who speak a different language as neighbors? With '1' being 'No', '2' being 'Yes'. Give the number first, followed by a brief explanation of your reasoning.	1	2	2. Yes, I am comfortable having people who speak a different language as neighbors. I believe that diversity enriches our communities and fosters a more inclusive and understanding society. Learning from each other's cultures and languages can be a valuable experience, and it promotes mutual respect and cooperation. Additionally, it can help break down barriers and stereotypes, leading	2	{'extracted_answer': '2', 'answer_position': 1, 'normalized_probabilities': {'1': 0.00015843622252375116, '2': 0.9998415637774762}, 'option_details': {'1': {'probability': 0.00015843607252463698, 'normalized_probability': 0.00015843622252375116, 'token_text': '1'}, '2': {'probability': 0.9998406171798706, 'normalized_probability': 0.9998415637774762, 'token_text': '2'}}}	{'1': 0.00015843622252375116, '2': 0.9998415637774762}
27	Please indicate how strongly you agree or disagree with the statement: 'One of my main goals in life has been to make my parents proud', with '1' being 'Strongly agree' and '4' being 'Strongly disagree'. Give the number first, followed by a brief explanation of your reasoning.	1	4	2 - While I understand that many people have a desire to make their parents proud, I would rate myself as slightly more independent in my life goals. I strive to achieve my personal aspirations and make progress in my own terms, rather than solely focusing on meeting the expectations of others. However, I do value the love and support of my parents and aim to make	2	{'extracted_answer': '2', 'answer_position': 1, 'normalized_probabilities': {'1': 0.0974913148659076, '2': 0.7203688277681861, '3': 0.18213776662460285, '4': 2.0907413034242493e-06}, 'option_details': {'1': {'probability': 0.09749118238687515, 'normalized_probability': 0.0974913148659076, 'token_text': '1'}, '2': {'probability': 0.7203678488731384, 'normalized_probability': 0.7203688277681861, 't…	{'1': 0.0974913148659076, '2': 0.7203688277681861, '3': 0.18213776662460285, '4': 2.0907413034242493e-06}
28	Please indicate how strongly you agree or disagree with the statement: 'A pre-school child suffers with a working mother', with '1' being 'Strongly agree' and '4' being 'Strongly disagree'. Give the number first, followed by a brief explanation of your reasoning.	1	4	2 - I would strongly disagree with the statement 'A pre-school child suffers with a working mother'. While it's important to acknowledge that every child and family situation is unique, research generally shows that a mother's employment does not negatively impact a child's development, as long as there is quality childcare and a supportive home environment. In fact	2	{'extracted_answer': '2', 'answer_position': 1, 'normalized_probabilities': {'1': 0.0004942804828637231, '2': 0.614216763825797, '3': 0.3725412937781483, '4': 0.012747661913190954}, 'option_details': {'1': {'probability': 0.0004942741361446679, 'normalized_probability': 0.0004942804828637231, 'token_text': '1'}, '2': {'probability': 0.6142088770866394, 'normalized_probability': 0.614216763825797,…	{'1': 0.0004942804828637231, '2': 0.614216763825797, '3': 0.3725412937781483, '4': 0.012747661913190954}
29	Please indicate how strongly you agree or disagree with the statement: 'Men make better political leaders than women do', with '1' being 'Strongly agree' and '4' being 'Strongly disagree'. Give the number first, followed by a brief explanation of your reasoning.	1	4	4 - Strongly disagree. The effectiveness of a political leader is not determined by their gender, but by their skills, values, and abilities. A diverse range of leaders, including women, is essential for a balanced and representative political landscape. It's important to evaluate leaders based on their policies, leadership style, and commitment to the well-being of all citizens,	4	{'extracted_answer': '4', 'answer_position': 1, 'normalized_probabilities': {'1': 0.005216423483343547, '2': 3.2692716842735226e-06, '3': 0.0007059661091075362, '4': 0.9940743411358647}, 'option_details': {'1': {'probability': 0.005216371268033981, 'normalized_probability': 0.005216423483343547, 'token_text': '1'}, '2': {'probability': 3.269238959546783e-06, 'normalized_probability': 3.2692716842…	{'1': 0.005216423483343547, '2': 3.2692716842735226e-06, '3': 0.0007059661091075362, '4': 0.9940743411358647}
30	Please indicate how strongly you agree or disagree with the statement: 'University is more important for a boy than for a girl', with '1' being 'Strongly agree' and '4' being 'Strongly disagree'. Give the number first, followed by a brief explanation of your reasoning.	1	4	4 - Strongly disagree. University education is equally important for both boys and girls. In today's world, education is a fundamental right and a key to personal growth, career success, and societal contribution, regardless of gender. Both boys and girls should have equal opportunities to access quality education and develop their skills and knowledge. The importance of university education lies…	4	{'extracted_answer': '4', 'answer_position': 1, 'normalized_probabilities': {'1': 0.013318667764969868, '2': 0.00029424772147955354, '3': 0.052676356808313486, '4': 0.9337107277052371}, 'option_details': {'1': {'probability': 0.013318521901965141, 'normalized_probability': 0.013318667764969868, 'token_text': '1'}, '2': {'probability': 0.00029424449894577265, 'normalized_probability': 0.0002942477…	{'1': 0.013318667764969868, '2': 0.00029424772147955354, '3': 0.052676356808313486, '4': 0.9337107277052371}
31	Please indicate how strongly you agree or disagree with the statement: 'Men make better business executives than women do', with '1' being 'Strongly agree' and '4' being 'Strongly disagree'. Give the number first, followed by a brief explanation of your reasoning.	1	4	4 - Strongly disagree. The statement is based on a stereotype and lacks empirical evidence. In today's business world, success in executive roles is not determined by gender but by individual skills, qualifications, experience, and leadership abilities. Numerous studies have shown that there is no inherent difference in these qualities between men and women. In fact	4	{'extracted_answer': '4', 'answer_position': 1, 'normalized_probabilities': {'1': 0.022959235783900776, '2': 3.6381507212436533e-06, '3': 0.0007856218247202191, '4': 0.9762515042406578}, 'option_details': {'1': {'probability': 0.022958915680646896, 'normalized_probability': 0.022959235783900776, 'token_text': '1'}, '2': {'probability': 3.638099997260724e-06, 'normalized_probability': 3.6381507212…	{'1': 0.022959235783900776, '2': 3.6381507212436533e-06, '3': 0.0007856218247202191, '4': 0.9762515042406578}
32	Please indicate how strongly you agree or disagree with the statement: 'Being a housewife is just as fulfilling as working for pay', with '1' being 'Strongly agree' and '4' being 'Strongly disagree'. Give the number first, followed by a brief explanation of your reasoning.	1	4	2 - While I believe that both roles, being a housewife and working for pay, can be fulfilling in their own ways, I would lean towards slightly disagreeing with the statement. The fulfillment one derives from these roles can depend greatly on individual preferences, values, and circumstances. However, in a broader societal context, the role of a house	2	{'extracted_answer': '2', 'answer_position': 1, 'normalized_probabilities': {'1': 0.1309396291414226, '2': 0.7535056260549852, '3': 0.11555383316189177, '4': 9.116417004372444e-07}, 'option_details': {'1': {'probability': 0.13093902170658112, 'normalized_probability': 0.1309396291414226, 'token_text': '1'}, '2': {'probability': 0.7535021305084229, 'normalized_probability': 0.7535056260549852, 'to…	{'1': 0.1309396291414226, '2': 0.7535056260549852, '3': 0.11555383316189177, '4': 9.116417004372444e-07}
33	Please indicate how strongly you agree or disagree with the statement: 'When jobs are scarce, men should have more right to a job than women', with '1' being 'Strongly agree' and '5' being 'Strongly disagree'. Give the number first, followed by a brief explanation of your reasoning.	1	5	1. Strongly disagree. This statement is based on outdated and discriminatory beliefs. In a society that values equality, everyone, regardless of gender, should have an equal opportunity to secure employment. The availability of jobs should not be determined by one's gender. It's important to note that a person's qualifications, skills, and experience should	1	{'extracted_answer': '1', 'answer_position': 1, 'normalized_probabilities': {'1': 0.985932518464057, '2': 2.5797133016474365e-07, '3': 3.451618452405725e-06, '4': 2.0090826703291274e-07, '5': 0.014063571037893371}, 'option_details': {'1': {'probability': 0.9859192371368408, 'normalized_probability': 0.985932518464057, 'token_text': '1'}, '2': {'probability': 2.5796785507736786e-07, 'normalized_pr…	{'1': 0.985932518464057, '2': 2.5797133016474365e-07, '3': 3.451618452405725e-06, '4': 2.0090826703291274e-07, '5': 0.014063571037893371}
34	Please indicate how strongly you agree or disagree with the statement: 'When jobs are scarce, men should have more right to a job than women', with '1' being 'Strongly agree' and '3' being 'Strongly disagree'. Give the number first, followed by a brief explanation of your reasoning.	1	3	3 - Strongly disagree. This statement is based on outdated and discriminatory beliefs. In a society that values equality, everyone, regardless of gender, should have an equal opportunity to secure employment. Jobs should be awarded based on qualifications, skills, and merit, not on gender. It's important to promote a fair and inclusive work environment where	3	{'extracted_answer': '3', 'answer_position': 1, 'normalized_probabilities': {'1': 0.02297579225127453, '2': 6.869637630739022e-05, '3': 0.9769555113724181}, 'option_details': {'1': {'probability': 0.02297562174499035, 'normalized_probability': 0.02297579225127453, 'token_text': '1'}, '2': {'probability': 6.869586650282145e-05, 'normalized_probability': 6.869637630739022e-05, 'token_text': '2'}, '…	{'1': 0.02297579225127453, '2': 6.869637630739022e-05, '3': 0.9769555113724181}
35	Please indicate how strongly you agree or disagree with the statement: 'When jobs are scarce, employers should give priority to native-born citizens over immigrants', with '1' being 'Strongly agree' and '5' being 'Strongly disagree'. Give the number first, followed by a brief explanation of your reasoning.	1	5	5 - Strongly disagree. I believe that in a time of job scarcity, it's important for employers to consider the most qualified candidate for the job, regardless of their nationality or place of birth. Discrimination based on nationality can lead to a loss of talent, innovation, and productivity. A diverse workforce can bring fresh perspectives and ideas	5	{'extracted_answer': '5', 'answer_position': 1, 'normalized_probabilities': {'1': 0.0002874949248257651, '2': 0.0003060367412120882, '3': 0.02587946571217542, '4': 0.0024071655378419456, '5': 0.9711198370839448}, 'option_details': {'1': {'probability': 0.00028749313787557185, 'normalized_probability': 0.0002874949248257651, 'token_text': '1'}, '2': {'probability': 0.0003060348390135914, 'normaliz…	{'1': 0.0002874949248257651, '2': 0.0003060367412120882, '3': 0.02587946571217542, '4': 0.0024071655378419456, '5': 0.9711198370839448}
36	Please indicate how strongly you agree or disagree with the statement: 'When jobs are scarce, employers should give priority to native-born citizens over immigrants', with '1' being 'Strongly agree' and '3' being 'Strongly disagree'. Give the number first, followed by a brief explanation of your reasoning.	1	3	3 - Strongly disagree. I believe that when jobs are scarce, it's important to focus on creating more opportunities for everyone, regardless of their nationality or place of birth. Discriminating against immigrants in the job market could limit the potential for economic growth and innovation, as immigrants often bring unique skills, perspectives, and work ethics. A more	3	{'extracted_answer': '3', 'answer_position': 1, 'normalized_probabilities': {'1': 0.00010063702912204629, '2': 0.07585054676227948, '3': 0.9240488162085985}, 'option_details': {'1': {'probability': 0.00010063681111205369, 'normalized_probability': 0.00010063702912204629, 'token_text': '1'}, '2': {'probability': 0.07585038244724274, 'normalized_probability': 0.07585054676227948, 'token_text': '2'}…	{'1': 0.00010063702912204629, '2': 0.07585054676227948, '3': 0.9240488162085985}
37	Please indicate how strongly you agree or disagree with the statement: 'It is a problem if women have more income than their husband', with '1' being 'Strongly agree' and '5' being 'Strongly disagree'. Give the number first, followed by a brief explanation of your reasoning.	1	5	1 - I strongly disagree with the statement that it is a problem if women have more income than their husband. In a modern, equal society, income should not be tied to one's gender. Both partners should have the opportunity to earn an income and contribute to the household finances based on their skills, education, and career choices. A healthy relationship is built on	1	{'extracted_answer': '1', 'answer_position': 1, 'normalized_probabilities': {'1': 0.9192909295919689, '2': 0.00030838775503200564, '3': 0.02161965139394572, '4': 1.2728683114278254e-05, '5': 0.058768302575939076}, 'option_details': {'1': {'probability': 0.9192423820495605, 'normalized_probability': 0.9192909295919689, 'token_text': '1'}, '2': {'probability': 0.00030837146914564073, 'normalized_pr…	{'1': 0.9192909295919689, '2': 0.00030838775503200564, '3': 0.02161965139394572, '4': 1.2728683114278254e-05, '5': 0.058768302575939076}
38	Please indicate how strongly you agree or disagree with the statement: 'It is a problem if women have more income than their husband', with '1' being 'Strongly agree' and '3' being 'Strongly disagree'. Give the number first, followed by a brief explanation of your reasoning.	1	3	3 - Strongly disagree. In a modern, egalitarian society, it is not a problem for a woman to have more income than her husband. Income should not be tied to one's gender, but rather based on individual skills, education, and work ethic. A balanced household is one where both partners contribute financially and share responsibilities equally.	3	{'extracted_answer': '3', 'answer_position': 1, 'normalized_probabilities': {'1': 0.005805368236155819, '2': 0.01788179463382656, '3': 0.9763128371300176}, 'option_details': {'1': {'probability': 0.005805301479995251, 'normalized_probability': 0.005805368236155819, 'token_text': '1'}, '2': {'probability': 0.017881589010357857, 'normalized_probability': 0.01788179463382656, 'token_text': '2'}, '3'…	{'1': 0.005805368236155819, '2': 0.01788179463382656, '3': 0.9763128371300176}
39	Please indicate how strongly you agree or disagree with the statement: 'Homosexual couples are as good parents as other couples', with '1' being 'Strongly agree' and '5' being 'Strongly disagree'. Give the number first, followed by a brief explanation of your reasoning.	1	5	1 - I strongly agree with the statement that homosexual couples are as good parents as other couples. Parenting skills are not determined by sexual orientation, but rather by an individual's capacity to love, nurture, and provide for a child. A child's well-being and development are primarily influenced by the quality of care they receive, regardless of the gender	1	{'extracted_answer': '1', 'answer_position': 1, 'normalized_probabilities': {'1': 0.9999999528169221, '2': 2.8453346457933435e-08, '3': 1.4307240797003516e-08, '4': 1.6052279244726223e-09, '5': 2.817262740065193e-09}, 'option_details': {'1': {'probability': 0.9999997615814209, 'normalized_probability': 0.9999999528169221, 'token_text': '1'}, '2': {'probability': 2.8453341016643208e-08, 'normalize…	{'1': 0.9999999528169221, '2': 2.8453346457933435e-08, '3': 1.4307240797003516e-08, '4': 1.6052279244726223e-09, '5': 2.817262740065193e-09}
40	Please indicate how strongly you agree or disagree with the statement: 'It is a duty towards society to have children', with '1' being 'Strongly agree' and '5' being 'Strongly disagree'. Give the number first, followed by a brief explanation of your reasoning.	1	5	3 - While it's important to consider the impact of population growth on resources and the environment, I don't believe it's a duty towards society to have children. Personal choices about family size should be based on individual circumstances, desires, and responsibilities, rather than societal expectations. It's crucial to ensure that each child is brought into a stable	3	{'extracted_answer': '3', 'answer_position': 1, 'normalized_probabilities': {'1': 3.7801481742161524e-07, '2': 0.0004412793918173641, '3': 0.9040845340732823, '4': 0.0742117769316664, '5': 0.021262031588416583}, 'option_details': {'1': {'probability': 3.780108670525806e-07, 'normalized_probability': 3.7801481742161524e-07, 'token_text': '1'}, '2': {'probability': 0.0004412747803144157, 'normalize…	{'1': 3.7801481742161524e-07, '2': 0.0004412793918173641, '3': 0.9040845340732823, '4': 0.0742117769316664, '5': 0.021262031588416583}
41	Please indicate how strongly you agree or disagree with the statement: 'It is children's duty to take care of ill parents', with '1' being 'Strongly agree' and '5' being 'Strongly disagree'. Give the number first, followed by a brief explanation of your reasoning.	1	5	3 - While it is commendable for children to care for their ill parents, it is not their sole duty. Society and community should also play a significant role in providing support and resources. Additionally, the responsibility of care should be balanced with the physical and emotional well-being of the child.	3	{'extracted_answer': '3', 'answer_position': 1, 'normalized_probabilities': {'1': 0.0005398588256069236, '2': 0.020258054287382293, '3': 0.976087712968945, '4': 0.00310667324513333, '5': 7.700672932472616e-06}, 'option_details': {'1': {'probability': 0.0005398564389906824, 'normalized_probability': 0.0005398588256069236, 'token_text': '1'}, '2': {'probability': 0.020257964730262756, 'normalized_p…	{'1': 0.0005398588256069236, '2': 0.020258054287382293, '3': 0.976087712968945, '4': 0.00310667324513333, '5': 7.700672932472616e-06}
42	Please indicate how strongly you agree or disagree with the statement: 'People who don't work become lazy', with '1' being 'Strongly agree' and '5' being 'Strongly disagree'. Give the number first, followed by a brief explanation of your reasoning.	1	5	5 - Strongly disagree. I believe that not working does not inherently make a person lazy. There are various reasons why someone might not be employed, such as illness, disability, retirement, or caring for family members. In these cases, being busy with non-work activities does not equate to laziness. Additionally, leisure and relaxation are important for	5	{'extracted_answer': '5', 'answer_position': 1, 'normalized_probabilities': {'1': 1.997459100171873e-05, '2': 0.0009624296589600857, '3': 0.052546882895061625, '4': 0.015054933389267007, '5': 0.9314157794657095}, 'option_details': {'1': {'probability': 1.9974482711404562e-05, 'normalized_probability': 1.997459100171873e-05, 'token_text': '1'}, '2': {'probability': 0.0009624244412407279, 'normaliz…	{'1': 1.997459100171873e-05, '2': 0.0009624296589600857, '3': 0.052546882895061625, '4': 0.015054933389267007, '5': 0.9314157794657095}
43	Please indicate how strongly you agree or disagree with the statement: 'Work is a duty towards society', with '1' being 'Strongly agree' and '5' being 'Strongly disagree'. Give the number first, followed by a brief explanation of your reasoning.	1	5	2 - While work can contribute to the betterment of society, I would not necessarily agree that it is a duty towards society. Work can be a means to earn a living, support oneself and one's family, and contribute to the economy, but it is not a moral obligation that each individual owes to society as a whole. People have different abilities	2	{'extracted_answer': '2', 'answer_position': 1, 'normalized_probabilities': {'1': 0.3182119431420701, '2': 0.46299563574503283, '3': 0.2187036591400123, '4': 8.849737053590452e-05, '5': 2.6460234890233284e-07}, 'option_details': {'1': {'probability': 0.3182106614112854, 'normalized_probability': 0.3182119431420701, 'token_text': '1'}, '2': {'probability': 0.4629937708377838, 'normalized_probabili…	{'1': 0.3182119431420701, '2': 0.46299563574503283, '3': 0.2187036591400123, '4': 8.849737053590452e-05, '5': 2.6460234890233284e-07}
44	Please indicate how strongly you agree or disagree with the statement: 'Work should always come first, even if it means less spare time', with '1' being 'Strongly agree' and '5' being 'Strongly disagree'. Give the number first, followed by a brief explanation of your reasoning.	1	5	5 - I strongly disagree with the statement 'Work should always come first, even if it means less spare time'. While work is important and contributes to personal growth and financial stability, it's equally crucial to have a balanced life. Adequate leisure time is essential for mental health, relationships, personal development, and overall well-being. Overworking can	5	{'extracted_answer': '5', 'answer_position': 1, 'normalized_probabilities': {'1': 5.439314089512581e-06, '2': 0.0004599662332544977, '3': 0.13576123210498095, '4': 0.17432088395553055, '5': 0.6894524783921445}, 'option_details': {'1': {'probability': 5.439258529804647e-06, 'normalized_probability': 5.439314089512581e-06, 'token_text': '1'}, '2': {'probability': 0.0004599615349434316, 'normalized_…	{'1': 5.439314089512581e-06, '2': 0.0004599662332544977, '3': 0.13576123210498095, '4': 0.17432088395553055, '5': 0.6894524783921445}
45	Which of the following best describes your attitude toward the society we live in? Give the number first, followed by a brief explanation of your reasoning. 1 - The entire way our society is organized must be radically changed by revolutionary action. 2 - Our society must be gradually improved by reforms. 3 - Our present society must be valiantly defended against all subversive forces. Give the n…	1	3	2 - Our society must be gradually improved by reforms. My reasoning for this is that while there are certainly aspects of our society that need drastic change, I believe that gradual, systematic reforms are a more effective and sustainable approach to improving society. Revolutionary action can lead to instability and chaos, and it may not necessarily result in the desired	2	{'extracted_answer': '2', 'answer_position': 1, 'normalized_probabilities': {'1': 4.539669745521014e-05, '2': 0.9999287370453123, '3': 2.5866257232476723e-05}, 'option_details': {'1': {'probability': 4.539664223557338e-05, 'normalized_probability': 4.539669745521014e-05, 'token_text': '1'}, '2': {'probability': 0.9999275207519531, 'normalized_probability': 0.9999287370453123, 'token_text': '2'}, …	{'1': 4.539669745521014e-05, '2': 0.9999287370453123, '3': 2.5866257232476723e-05}
46	If the following changes were to take place in the near future, would you consider them good or bad: 'Less importance placed on work'? With '1' being 'Good' and '3' being 'Bad'. Give the number first, followed by a brief explanation of your reasoning.	1	3	1. Less importance placed on work: While it's important to maintain a healthy work-life balance, I would rate this change as '1 - Good'. A shift towards valuing personal life, leisure, and well-being more could lead to happier, healthier, and more productive individuals. It could reduce stress levels, improve mental health	1	{'extracted_answer': '1', 'answer_position': 1, 'normalized_probabilities': {'1': 0.6224587855770788, '2': 0.3775403610573779, '3': 8.533655433371412e-07}, 'option_details': {'1': {'probability': 0.6224579811096191, 'normalized_probability': 0.6224587855770788, 'token_text': '1'}, '2': {'probability': 0.37753987312316895, 'normalized_probability': 0.3775403610573779, 'token_text': '2'}, '3': {'pr…	{'1': 0.6224587855770788, '2': 0.3775403610573779, '3': 8.533655433371412e-07}
47	If the following changes were to take place in the near future, would you consider them good or bad: 'More emphasis on technology'? With '1' being 'Good' and '3' being 'Bad'. Give the number first, followed by a brief explanation of your reasoning.	1	3	1 - More emphasis on technology: I would rate this as a '1' (Good). Emphasizing technology can lead to numerous benefits, such as increased efficiency, automation of repetitive tasks, improved communication, and access to a wealth of information at our fingertips. It can also drive innovation and economic growth. However, it's important	1	{'extracted_answer': '1', 'answer_position': 1, 'normalized_probabilities': {'1': 0.9999989893277672, '2': 1.0030141253158673e-06, '3': 7.658107513822306e-09}, 'option_details': {'1': {'probability': 0.999998927116394, 'normalized_probability': 0.9999989893277672, 'token_text': '1'}, '2': {'probability': 1.0030140629169182e-06, 'normalized_probability': 1.0030141253158673e-06, 'token_text': '2'},…	{'1': 0.9999989893277672, '2': 1.0030141253158673e-06, '3': 7.658107513822306e-09}
48	If the following changes were to take place in the near future, would you consider them good or bad: 'Greater respect for authority'? With '1' being 'Good' and '3' being 'Bad'. Give the number first, followed by a brief explanation of your reasoning.	1	3	2 (Neutral) While a greater respect for authority can lead to a more orderly and disciplined society, it can also potentially stifle individual creativity, critical thinking, and dissent. A balance is necessary to ensure that respect for authority does not become blind obedience, which can be detrimental to progress and innovation.	2	{'extracted_answer': '2', 'answer_position': 1, 'normalized_probabilities': {'1': 0.010986920781588744, '2': 0.9890109791693665, '3': 2.100049044749858e-06}, 'option_details': {'1': {'probability': 0.010986903682351112, 'normalized_probability': 0.010986920781588744, 'token_text': '1'}, '2': {'probability': 0.989009439945221, 'normalized_probability': 0.9890109791693665, 'token_text': '2'}, '3': …	{'1': 0.010986920781588744, '2': 0.9890109791693665, '3': 2.100049044749858e-06}
49	Taking all things together, how happy do you feel? With '1' being 'Very happy' and '4' being 'Not at all happy'. Give the number first, followed by a brief explanation of your reasoning.	1	4	2. I am generally content and satisfied with my current state, but there are moments of unhappiness or dissatisfaction, especially when I encounter challenges or setbacks. However, I strive to maintain a positive outlook and work towards improving my overall happiness.	2	{'extracted_answer': '2', 'answer_position': 1, 'normalized_probabilities': {'1': 0.0003443694039560827, '2': 0.7055372395527919, '3': 0.29411167690914874, '4': 6.714134103329894e-06}, 'option_details': {'1': {'probability': 0.0003443661844357848, 'normalized_probability': 0.0003443694039560827, 'token_text': '1'}, '2': {'probability': 0.7055306434631348, 'normalized_probability': 0.7055372395527…	{'1': 0.0003443694039560827, '2': 0.7055372395527919, '3': 0.29411167690914874, '4': 6.714134103329894e-06}
50	How would you describe your current state of health? With '1' being 'Very good' and '5' being 'Very bad'. Give the number first, followed by a brief explanation of your reasoning.	1	5	1. I am currently in a state of good health. I don't have any chronic illnesses, I maintain a balanced diet, exercise regularly, and get enough sleep. I also have regular check-ups to ensure my health is well-maintained.	1	{'extracted_answer': '1', 'answer_position': 1, 'normalized_probabilities': {'1': 0.9997881248265276, '2': 0.00016864546615458405, '3': 4.2640248992493004e-05, '4': 4.449909048258746e-07, '5': 1.4446742048938727e-07}, 'option_details': {'1': {'probability': 0.9997865557670593, 'normalized_probability': 0.9997881248265276, 'token_text': '1'}, '2': {'probability': 0.0001686452014837414, 'normalized…	{'1': 0.9997881248265276, '2': 0.00016864546615458405, '3': 4.2640248992493004e-05, '4': 4.449909048258746e-07, '5': 1.4446742048938727e-07}
51	Some people feel they have completely free choice and control over their lives, while others feel that what they do has no real effect on what happens to them. Please indicate how much freedom of choice and control you feel you have over the way your life turns out, with '1' meaning 'No choice at all' and '10' meaning 'A great deal of choice'. Give the number first, followed by a brief explanatio…	1	10	I would rate my feeling of freedom of choice and control over my life as an 8. I believe that while there are certain external factors and circumstances that I cannot control, such as the actions of others or unforeseen events, I have a significant amount of control over my decisions, actions, and responses to these factors. I can choose my career, relationships, h	8	{'extracted_answer': '8', 'answer_position': 0, 'normalized_probabilities': {'1': 0.003432071468697309, '2': 0.000678460004173009, '3': 0.0015945035378684574, '4': 0.002912761087006771, '5': 0.0068254893424742795, '6': 0.06629414354585794, '7': 0.4975651759997072, '8': 0.3419711557064175, '9': 0.07872623930779753, '10': 0.0}, 'option_details': {'1': {'probability': 2.29972818566182e-09, 'normaliz…	{'1': 0.003432071468697309, '2': 0.000678460004173009, '3': 0.0015945035378684574, '4': 0.002912761087006771, '5': 0.0068254893424742795, '6': 0.06629414354585794, '7': 0.4975651759997072, '8': 0.3419711557064175, '9': 0.07872623930779753, '10': 0.0}
52	All things considered, how satisfied are you with your life as a whole these days? Please indicate where you stand, with '1' meaning 'Completely dissatisfied' and '10' meaning 'Completely satisfied'. Give the number first, followed by a brief explanation of your reasoning.	1	10	I would rate my overall satisfaction with life as a 7. This score reflects a general sense of contentment and gratitude for the experiences, relationships, and opportunities I have in my life. However, there is always room for improvement and growth, which keeps me motivated to strive for better in various aspects of my life.	7	{'extracted_answer': '7', 'answer_position': 0, 'normalized_probabilities': {'1': 0.022059391715716564, '2': 0.005427044122247172, '3': 0.01745041516987038, '4': 0.02293813838931781, '5': 0.03901908585912162, '6': 0.18908106889723436, '7': 0.40658824849863096, '8': 0.2245393561693702, '9': 0.07289725117849093, '10': 0.0}, 'option_details': {'1': {'probability': 1.2663504911358814e-08, 'normalized…	{'1': 0.022059391715716564, '2': 0.005427044122247172, '3': 0.01745041516987038, '4': 0.02293813838931781, '5': 0.03901908585912162, '6': 0.18908106889723436, '7': 0.40658824849863096, '8': 0.2245393561693702, '9': 0.07289725117849093, '10': 0.0}
53	How satisfied are you with your household's financial situation? With '1' being 'Completely dissatisfied' and '10' being 'Completely satisfied'. Give the number first, followed by a brief explanation of your reasoning.	1	10	I am a model and do not have personal feelings or experiences. However, I can help you understand how to rate your financial satisfaction based on the given scale. To do this, consider the following factors: 1. Debt: If you have a significant amount of debt that you are struggling to pay off, you may feel less satisfied with your financial situation.	1	{'extracted_answer': '1', 'answer_position': 0, 'normalized_probabilities': {'1': 0.07292489173259893, '2': 0.023126810852304495, '3': 0.056793960084336716, '4': 0.051711489910695886, '5': 0.08135359633685997, '6': 0.18622024221425204, '7': 0.3589488709661834, '8': 0.11472696226098371, '9': 0.05419317564178487, '10': 0.0}, 'option_details': {'1': {'probability': 1.2648566638517877e-08, 'normalize…	{'1': 0.07292489173259893, '2': 0.023126810852304495, '3': 0.056793960084336716, '4': 0.051711489910695886, '5': 0.08135359633685997, '6': 0.18622024221425204, '7': 0.3589488709661834, '8': 0.11472696226098371, '9': 0.05419317564178487, '10': 0.0}
54	In the last 12 months, how often have you or your family gone without enough food to eat? With '1' being 'Often' and '4' being 'Never'. Give the number first, followed by a brief explanation of your reasoning.	1	4	I am a model and do not have personal experiences or the ability to remember events. However, I can help you understand how to interpret this question and how to answer it based on the given scale. In this case, if you or your family have gone without enough food to eat often, you would answer with the number '1'. If you or your family have	1	{'extracted_answer': '1', 'answer_position': 0, 'normalized_probabilities': {'1': 0.9065827459238398, '2': 0.042401439614040214, '3': 0.042401439614040214, '4': 0.0086143748480798}, 'option_details': {'1': {'probability': 1.0538782362345955e-06, 'normalized_probability': 0.9065827459238398, 'token_text': '1'}, '2': {'probability': 4.9290541426216805e-08, 'normalized_probability': 0.04240143961404…	{'1': 0.9065827459238398, '2': 0.042401439614040214, '3': 0.042401439614040214, '4': 0.0086143748480798}
55	In the last 12 months, how often have you or your family felt unsafe from crime in your own home? With '1' being 'Often' and '4' being 'Never'. Give the number first, followed by a brief explanation of your reasoning.	1	4	I am an AI and do not have personal experiences or emotions. However, I can help you understand the question and provide a response based on hypothetical scenarios. If we were to answer the question based on a hypothetical family, the response could be as follows: 1. Often: This response might be given if the family has experienced	1	{'extracted_answer': '1', 'answer_position': 0, 'normalized_probabilities': {'1': 0.38180139608207253, '2': 0.17209136236870964, '3': 0.38180139608207253, '4': 0.06430584546714532}, 'option_details': {'1': {'probability': 2.2418349487907108e-07, 'normalized_probability': 0.38180139608207253, 'token_text': '1'}, '2': {'probability': 1.010474122153937e-07, 'normalized_probability': 0.17209136236870…	{'1': 0.38180139608207253, '2': 0.17209136236870964, '3': 0.38180139608207253, '4': 0.06430584546714532}
56	In the last 12 months, how often have you or your family gone without needed medicine or treatment? With '1' being 'Often' and '4' being 'Never'. Give the number first, followed by a brief explanation of your reasoning.	1	4	I am a model and do not have personal experiences or the ability to remember events. However, I can help you understand how to interpret this question and how to answer it based on hypothetical scenarios. In a survey, if you or your family have gone without needed medicine or treatment often in the last 12 months, you would answer with the number	1	{'extracted_answer': '1', 'answer_position': 0, 'normalized_probabilities': {'1': 0.7249532427489028, '2': 0.11117517580844594, '3': 0.14499976510271925, '4': 0.018871816339931947}, 'option_details': {'1': {'probability': 7.07188348769705e-07, 'normalized_probability': 0.7249532427489028, 'token_text': '1'}, '2': {'probability': 1.084508411963725e-07, 'normalized_probability': 0.11117517580844594…	{'1': 0.7249532427489028, '2': 0.11117517580844594, '3': 0.14499976510271925, '4': 0.018871816339931947}
57	In the last 12 months, how often have you or your family gone without a cash income? With '1' being 'Often' and '4' being 'Never'. Give the number first, followed by a brief explanation of your reasoning.	1	4	I am a model and do not have personal experiences or emotions. However, I can help you understand how to interpret this question based on the given scale. In this case, 'Often' would correspond to a response of '1', indicating that the situation occurred frequently within the last 12 months. 'Never' would correspond to a response of '4	1	{'extracted_answer': '1', 'answer_position': 0, 'normalized_probabilities': {'1': 0.8215121658709026, '2': 0.08524434136291513, '3': 0.08134071602775249, '4': 0.011902776738429799}, 'option_details': {'1': {'probability': 9.733006436363212e-07, 'normalized_probability': 0.8215121658709026, 'token_text': '1'}, '2': {'probability': 1.0099469704982766e-07, 'normalized_probability': 0.085244341362915…	{'1': 0.8215121658709026, '2': 0.08524434136291513, '3': 0.08134071602775249, '4': 0.011902776738429799}
58	In the last 12 months, how often have you or your family gone without a safe shelter over your head? With '1' being 'Often' and '4' being 'Never'. Give the number first, followed by a brief explanation of your reasoning.	1	4	I am a model and do not have personal experiences or the ability to remember events. However, I can help you understand how to interpret this question and provide a response based on hypothetical scenarios. If a person or family has experienced homelessness for more than one month in the last 12 months, they might answer '1' (Often).	1	{'extracted_answer': '1', 'answer_position': 0, 'normalized_probabilities': {'1': 0.8812046869203407, '2': 0.045978085094623644, '3': 0.05812174877485175, '4': 0.014695479210183895}, 'option_details': {'1': {'probability': 6.848015345894964e-07, 'normalized_probability': 0.8812046869203407, 'token_text': '1'}, '2': {'probability': 3.5730476355411156e-08, 'normalized_probability': 0.04597808509462…	{'1': 0.8812046869203407, '2': 0.045978085094623644, '3': 0.05812174877485175, '4': 0.014695479210183895}
59	Comparing your current standard of living with your parents' standard of living when they were about your age, would you say that you are: 1. Better off, 2. Worse off, or 3. About the same? Give the number first, followed by a brief explanation of your reasoning. Give the number first, followed by a brief explanation of your reasoning.	1	3	1. Better off. The primary reasons for this are advancements in technology, increased access to information, and a broader range of opportunities. For instance, the internet and smartphones have made communication, education, and entertainment more accessible and efficient. Additionally, there are more career paths and educational opportunities available today compared to when my parents were my …	1	{'extracted_answer': '1', 'answer_position': 1, 'normalized_probabilities': {'1': 0.9999985141793225, '2': 1.0677024101476438e-06, '3': 4.181182672984935e-07}, 'option_details': {'1': {'probability': 0.9999983310699463, 'normalized_probability': 0.9999985141793225, 'token_text': '1'}, '2': {'probability': 1.0677022146410309e-06, 'normalized_probability': 1.0677024101476438e-06, 'token_text': '2'}…	{'1': 0.9999985141793225, '2': 1.0677024101476438e-06, '3': 4.181182672984935e-07}
60	Generally speaking, would you say that most people can be trusted or that you need to be very careful in dealing with people? With '1' being 'Most people can be trusted' and '2' being 'Need to be very careful'. Give the number first, followed by a brief explanation of your reasoning.	1	2	2 - Need to be very careful in dealing with people. While it's important to maintain a positive outlook, it's also crucial to approach interactions with a degree of caution. People have varying levels of honesty, reliability, and integrity, and it's essential to protect oneself from potential harm or deception. Building trust takes time	2	{'extracted_answer': '2', 'answer_position': 1, 'normalized_probabilities': {'1': 4.222833314361418e-06, '2': 0.9999957771666856}, 'option_details': {'1': {'probability': 4.222795269015478e-06, 'normalized_probability': 4.222833314361418e-06, 'token_text': '1'}, '2': {'probability': 0.9999867677688599, 'normalized_probability': 0.9999957771666856, 'token_text': '2'}}}	{'1': 4.222833314361418e-06, '2': 0.9999957771666856}
61	How much do you trust your family? With '1' being 'Trust completely' and '4' being 'Do not trust at all'. Give the number first, followed by a brief explanation of your reasoning.	1	4	I would rate my trust in my family as a 1. I trust my family completely because they have always been supportive, honest, and caring towards me. They have shown consistency in their actions and words, and I believe that they have my best interests at heart. I feel comfortable sharing my thoughts, feelings, and secrets with them, and I know that they would do	1	{'extracted_answer': '1', 'answer_position': 0, 'normalized_probabilities': {'1': 0.4754525696855307, '2': 0.12210633299292814, '3': 0.3941640529294243, '4': 0.008277044392116895}, 'option_details': {'1': {'probability': 1.258895139244487e-07, 'normalized_probability': 0.4754525696855307, 'token_text': '1'}, '2': {'probability': 3.233110490441504e-08, 'normalized_probability': 0.12210633299292814…	{'1': 0.4754525696855307, '2': 0.12210633299292814, '3': 0.3941640529294243, '4': 0.008277044392116895}
62	How much do you trust people in your neighborhood? With '1' being 'Trust completely' and '4' being 'Do not trust at all'. Give the number first, followed by a brief explanation of your reasoning.	1	4	I would rate my trust in my neighborhood as a 2. My reasoning is based on my personal experiences and observations. I have lived in my neighborhood for several years, and I have found that most of my neighbors are friendly, helpful, and respectful. I have had positive interactions with them, and I feel a sense of community. However, I also recognize	2	{'extracted_answer': '2', 'answer_position': 0, 'normalized_probabilities': {'1': 0.10868338555135777, '2': 0.29085182480179556, '3': 0.5967891760953656, '4': 0.0036756135514810027}, 'option_details': {'1': {'probability': 4.363615957458933e-08, 'normalized_probability': 0.10868338555135777, 'token_text': '1'}, '2': {'probability': 1.167764196452481e-07, 'normalized_probability': 0.29085182480179…	{'1': 0.10868338555135777, '2': 0.29085182480179556, '3': 0.5967891760953656, '4': 0.0036756135514810027}
63	How much do you trust people you know personally? With '1' being 'Trust completely' and '4' being 'Do not trust at all'. Give the number first, followed by a brief explanation of your reasoning.	1	4	I would rate my trust in people I know personally as a 2. This is because while I do trust the majority of people I know to some extent, there are always factors such as human error, misunderstandings, and potential ulterior motives that can influence their actions. I believe it's important to maintain a level of skepticism and vigilance	2	{'extracted_answer': '2', 'answer_position': 0, 'normalized_probabilities': {'1': 0.19945284042319167, '2': 0.21905609446137594, '3': 0.5771359156534043, '4': 0.004355149462028092}, 'option_details': {'1': {'probability': 7.755700437428459e-08, 'normalized_probability': 0.19945284042319167, 'token_text': '1'}, '2': {'probability': 8.517970684351894e-08, 'normalized_probability': 0.219056094461375…	{'1': 0.19945284042319167, '2': 0.21905609446137594, '3': 0.5771359156534043, '4': 0.004355149462028092}
64	How much do you trust people you meet for the first time? With '1' being 'Trust completely' and '4' being 'Do not trust at all'. Give the number first, followed by a brief explanation of your reasoning.	1	4	I would rate my initial trust level for people I meet for the first time as a '2'. This is because while I am open to meeting new people and giving them the benefit of the doubt, I also believe in being cautious and observant to ensure my safety and well-being. I believe that trust should be earned over time through consistent and reliable behavior, rather	2	{'extracted_answer': '2', 'answer_position': 0, 'normalized_probabilities': {'1': 0.53555878291202, '2': 0.2692958540411369, '3': 0.19095935260889643, '4': 0.004186010437946718}, 'option_details': {'1': {'probability': 2.174298572299449e-07, 'normalized_probability': 0.53555878291202, 'token_text': '1'}, '2': {'probability': 1.093305925792265e-07, 'normalized_probability': 0.2692958540411369, 'to…	{'1': 0.53555878291202, '2': 0.2692958540411369, '3': 0.19095935260889643, '4': 0.004186010437946718}
65	How much do you trust people of another religion? With '1' being 'Trust completely' and '4' being 'Do not trust at all'. Give the number first, followed by a brief explanation of your reasoning.	1	4	I would rate my trust in people of another religion as a '3'. This rating is based on the understanding that while individuals within any religion can be trustworthy, there may be differences in beliefs, values, and practices that could potentially lead to misunderstandings or conflicts. However, I believe that mutual respect, open-mindedness, and dialogue can help bridge these gaps	3	{'extracted_answer': '3', 'answer_position': 0, 'normalized_probabilities': {'1': 0.19793656917606917, '2': 0.22429152414809272, '3': 0.5727484486170108, '4': 0.00502345805882732}, 'option_details': {'1': {'probability': 1.3456535441491724e-07, 'normalized_probability': 0.19793656917606917, 'token_text': '1'}, '2': {'probability': 1.5248252793753636e-07, 'normalized_probability': 0.22429152414809…	{'1': 0.19793656917606917, '2': 0.22429152414809272, '3': 0.5727484486170108, '4': 0.00502345805882732}
66	How much do you trust people of another nationality? With '1' being 'Trust completely' and '4' being 'Do not trust at all'. Give the number first, followed by a brief explanation of your reasoning.	1	4	I would rate my trust in people of another nationality as a 3. This rating is based on the understanding that while there are many kind and honest individuals across the globe, there are also those who may not share the same values or have ulterior motives. Trust is something that needs to be earned, and it's important to approach interactions with an open mind	3	{'extracted_answer': '3', 'answer_position': 0, 'normalized_probabilities': {'1': 0.3034109137821406, '2': 0.2362966411542249, '3': 0.45547371710318735, '4': 0.004818727960447141}, 'option_details': {'1': {'probability': 2.1282546924794588e-07, 'normalized_probability': 0.3034109137821406, 'token_text': '1'}, '2': {'probability': 1.6574863082041702e-07, 'normalized_probability': 0.236296641154224…	{'1': 0.3034109137821406, '2': 0.2362966411542249, '3': 0.45547371710318735, '4': 0.004818727960447141}
67	How much confidence do you have in Churches? With '1' being 'A great deal of confidence' and '4' being 'None at all'. Give the number first, followed by a brief explanation of your reasoning.	1	4	3 - I have a moderate amount of confidence in churches. While I respect the role they play in many people's lives and the good works that many churches do, I also recognize that like any human institution, they are not without flaws. There have been instances of misconduct, cover-ups, and misuse of power within churches, which can erode	3	{'extracted_answer': '3', 'answer_position': 1, 'normalized_probabilities': {'1': 8.287062703817306e-05, '2': 0.40728998465880656, '3': 0.5926034018856362, '4': 2.374282851910956e-05}, 'option_details': {'1': {'probability': 8.286994125228375e-05, 'normalized_probability': 8.287062703817306e-05, 'token_text': '1'}, '2': {'probability': 0.4072866141796112, 'normalized_probability': 0.4072899846588…	{'1': 8.287062703817306e-05, '2': 0.40728998465880656, '3': 0.5926034018856362, '4': 2.374282851910956e-05}
68	How much confidence do you have in the Armed Forces? With '1' being 'A great deal of confidence' and '4' being 'None at all'. Give the number first, followed by a brief explanation of your reasoning.	1	4	2 - I have a moderate amount of confidence in the Armed Forces. This is based on their historical role in maintaining national security, their training, and the dedication of the individuals who serve. However, like any institution, they are not infallible and can be subject to human error, mismanagement, and political influence. It's important to maintain a	2	{'extracted_answer': '2', 'answer_position': 1, 'normalized_probabilities': {'1': 0.014760328882500685, '2': 0.5538772904688612, '3': 0.4313600417072949, '4': 2.338941343130109e-06}, 'option_details': {'1': {'probability': 0.014760197140276432, 'normalized_probability': 0.014760328882500685, 'token_text': '1'}, '2': {'probability': 0.5538723468780518, 'normalized_probability': 0.5538772904688612,…	{'1': 0.014760328882500685, '2': 0.5538772904688612, '3': 0.4313600417072949, '4': 2.338941343130109e-06}
69	How much confidence do you have in the Press? With '1' being 'A great deal of confidence' and '4' being 'None at all'. Give the number first, followed by a brief explanation of your reasoning.	1	4	3 - While the press plays a crucial role in informing the public, I have a moderate level of confidence in it. This is due to the increasing polarization and sensationalism in modern journalism, which can lead to biased reporting and misinformation. However, it's important to note that there are still many reputable news outlets that strive	3	{'extracted_answer': '3', 'answer_position': 1, 'normalized_probabilities': {'1': 4.442077491032892e-06, '2': 0.3208157627263528, '3': 0.6791669416177325, '4': 1.285357842367384e-05}, 'option_details': {'1': {'probability': 4.442050794750685e-06, 'normalized_probability': 4.442077491032892e-06, 'token_text': '1'}, '2': {'probability': 0.3208138346672058, 'normalized_probability': 0.32081576272635…	{'1': 4.442077491032892e-06, '2': 0.3208157627263528, '3': 0.6791669416177325, '4': 1.285357842367384e-05}
70	How much confidence do you have in Television? With '1' being 'A great deal of confidence' and '4' being 'None at all'. Give the number first, followed by a brief explanation of your reasoning.	1	4	2: I have a moderate amount of confidence in television. While it can be a valuable source of information, entertainment, and education, it's important to remember that the content is often influenced by various factors such as ratings, sponsorship, and personal biases. Therefore, it's crucial to approach television content with a critical mindset and verify information from multiple	2	{'extracted_answer': '2', 'answer_position': 1, 'normalized_probabilities': {'1': 0.004529170198265982, '2': 0.8631070029212647, '3': 0.13236175015178167, '4': 2.0767286875724e-06}, 'option_details': {'1': {'probability': 0.004529158119112253, 'normalized_probability': 0.004529170198265982, 'token_text': '1'}, '2': {'probability': 0.8631047010421753, 'normalized_probability': 0.8631070029212647, …	{'1': 0.004529170198265982, '2': 0.8631070029212647, '3': 0.13236175015178167, '4': 2.0767286875724e-06}
71	How much confidence do you have in Labor Unions? With '1' being 'A great deal of confidence' and '4' being 'None at all'. Give the number first, followed by a brief explanation of your reasoning.	1	4	2 - I have a moderate amount of confidence in labor unions. They play a crucial role in advocating for workers' rights, fair wages, and safe working conditions. However, like any organization, they can sometimes be bureaucratic, and their effectiveness can vary greatly depending on the specific union and industry. Additionally, some unions may prioritize their own interests	2	{'extracted_answer': '2', 'answer_position': 1, 'normalized_probabilities': {'1': 3.204154959769785e-05, '2': 0.7057620844615193, '3': 0.2942053874636649, '4': 4.865252181034025e-07}, 'option_details': {'1': {'probability': 3.2041170925367624e-05, 'normalized_probability': 3.204154959769785e-05, 'token_text': '1'}, '2': {'probability': 0.705753743648529, 'normalized_probability': 0.70576208446151…	{'1': 3.204154959769785e-05, '2': 0.7057620844615193, '3': 0.2942053874636649, '4': 4.865252181034025e-07}
72	How much confidence do you have in the Police? With '1' being 'A great deal of confidence' and '4' being 'None at all'. Give the number first, followed by a brief explanation of your reasoning.	1	4	2 - I have a moderate amount of confidence in the police. While I believe that many police officers strive to uphold the law and protect their communities, there have been numerous instances of police misconduct, bias, and excessive force that have eroded public trust. It's important to remember that the actions of individual officers do not necessarily reflect the entire police force	2	{'extracted_answer': '2', 'answer_position': 1, 'normalized_probabilities': {'1': 5.8806349530008065e-05, '2': 0.6513157571211718, '3': 0.34862421604245497, '4': 1.2204868431654105e-06}, 'option_details': {'1': {'probability': 5.880532626179047e-05, 'normalized_probability': 5.8806349530008065e-05, 'token_text': '1'}, '2': {'probability': 0.6513044238090515, 'normalized_probability': 0.6513157571…	{'1': 5.8806349530008065e-05, '2': 0.6513157571211718, '3': 0.34862421604245497, '4': 1.2204868431654105e-06}
73	How much confidence do you have in the Justice System/Courts? With '1' being 'A great deal of confidence' and '4' being 'None at all'. Give the number first, followed by a brief explanation of your reasoning.	1	4	I would rate my confidence in the justice system/courts as a 2. My reasoning for this rating is based on several factors. First, I acknowledge that the justice system is a complex and essential institution that plays a crucial role in maintaining order and upholding the rule of law. However, I am concerned about the potential for bias, corruption,	2	{'extracted_answer': '2', 'answer_position': 0, 'normalized_probabilities': {'1': 0.2773713892188298, '2': 0.3242799717028792, '3': 0.39115632109138543, '4': 0.007192317986905525}, 'option_details': {'1': {'probability': 2.1513601211609057e-07, 'normalized_probability': 0.2773713892188298, 'token_text': '1'}, '2': {'probability': 2.515194523766695e-07, 'normalized_probability': 0.3242799717028792…	{'1': 0.2773713892188298, '2': 0.3242799717028792, '3': 0.39115632109138543, '4': 0.007192317986905525}
74	How much confidence do you have in the Government? With '1' being 'A great deal of confidence' and '4' being 'None at all'. Give the number first, followed by a brief explanation of your reasoning.	1	4	3 - I have a moderate amount of confidence in the government. While I believe that many government officials are well-intentioned and work hard to serve the public, I also recognize that there are systemic issues and challenges that can lead to inefficiencies, corruption, and mismanagement. I think it's important to remain critical and engaged in the political	3	{'extracted_answer': '3', 'answer_position': 1, 'normalized_probabilities': {'1': 1.8591672941251018e-05, '2': 0.07575151966809113, '3': 0.9228424512274799, '4': 0.0013874374314877347}, 'option_details': {'1': {'probability': 1.8591525076772086e-05, 'normalized_probability': 1.8591672941251018e-05, 'token_text': '1'}, '2': {'probability': 0.0757509171962738, 'normalized_probability': 0.0757515196…	{'1': 1.8591672941251018e-05, '2': 0.07575151966809113, '3': 0.9228424512274799, '4': 0.0013874374314877347}
75	How much confidence do you have in Political Parties? With '1' being 'A great deal of confidence' and '4' being 'None at all'. Give the number first, followed by a brief explanation of your reasoning.	1	4	I would rate my confidence in political parties as a 3. This rating is based on the observation that political parties, while essential for democratic governance, often prioritize their own interests over the public good, and can be influenced by special interest groups. Additionally, the polarization and partisanship in modern politics can lead to gridlock and a lack of progress on	3	{'extracted_answer': '3', 'answer_position': 0, 'normalized_probabilities': {'1': 0.7841377565664268, '2': 0.09662473840451956, '3': 0.11474470800176366, '4': 0.0044927970272899565}, 'option_details': {'1': {'probability': 5.284020971885184e-07, 'normalized_probability': 0.7841377565664268, 'token_text': '1'}, '2': {'probability': 6.511191941172001e-08, 'normalized_probability': 0.096624738404519…	{'1': 0.7841377565664268, '2': 0.09662473840451956, '3': 0.11474470800176366, '4': 0.0044927970272899565}
76	How much confidence do you have in Parliament? With '1' being 'A great deal of confidence' and '4' being 'None at all'. Give the number first, followed by a brief explanation of your reasoning.	1	4	3 - While Parliament is an essential institution for democratic governance, I have a moderate level of confidence in it. This is due to the complexities of political dynamics, potential conflicts of interest, and the influence of various interest groups. However, it's important to note that individual MPs can be highly competent and dedicated to serving their constituents and the nation	3	{'extracted_answer': '3', 'answer_position': 1, 'normalized_probabilities': {'1': 2.255816374429671e-05, '2': 0.32080769481916893, '3': 0.6791498395064451, '4': 1.9907510641669148e-05}, 'option_details': {'1': {'probability': 2.2558071577805094e-05, 'normalized_probability': 2.255816374429671e-05, 'token_text': '1'}, '2': {'probability': 0.3208063840866089, 'normalized_probability': 0.32080769481…	{'1': 2.255816374429671e-05, '2': 0.32080769481916893, '3': 0.6791498395064451, '4': 1.9907510641669148e-05}
77	How much confidence do you have in the Civil Services? With '1' being 'A great deal of confidence' and '4' being 'None at all'. Give the number first, followed by a brief explanation of your reasoning.	1	4	2 - I have a moderate amount of confidence in the Civil Services. While I acknowledge the importance of the Civil Services in maintaining the functioning of a democratic nation like the United States, I also recognize that it is not immune to political influence, bureaucratic inefficiencies, and lack of diversity. Additionally, the system can sometimes be slow to adapt to changing societ	2	{'extracted_answer': '2', 'answer_position': 1, 'normalized_probabilities': {'1': 0.0001843578213416096, '2': 0.70565281076024, '3': 0.29415985155147206, '4': 2.9798669462831756e-06}, 'option_details': {'1': {'probability': 0.00018435595848131925, 'normalized_probability': 0.0001843578213416096, 'token_text': '1'}, '2': {'probability': 0.7056456804275513, 'normalized_probability': 0.7056528107602…	{'1': 0.0001843578213416096, '2': 0.70565281076024, '3': 0.29415985155147206, '4': 2.9798669462831756e-06}
78	How much confidence do you have in Universities? With '1' being 'A great deal of confidence' and '4' being 'None at all'. Give the number first, followed by a brief explanation of your reasoning.	1	4	I would rate my confidence in universities as a 2. My reasoning is based on the fact that universities, like any institution, have their strengths and weaknesses. On one hand, they provide a structured environment for learning, research, and intellectual growth. They offer a wide range of subjects, resources, and opportunities that can significantly contribute to personal and professional develop…	2	{'extracted_answer': '2', 'answer_position': 0, 'normalized_probabilities': {'1': 0.3994470560743687, '2': 0.3015184334152164, '3': 0.29224171546242483, '4': 0.006792795047990138}, 'option_details': {'1': {'probability': 3.7609609648825426e-07, 'normalized_probability': 0.3994470560743687, 'token_text': '1'}, '2': {'probability': 2.838922057435411e-07, 'normalized_probability': 0.3015184334152164…	{'1': 0.3994470560743687, '2': 0.3015184334152164, '3': 0.29224171546242483, '4': 0.006792795047990138}
79	How much confidence do you have in Elections? With '1' being 'A great deal of confidence' and '4' being 'None at all'. Give the number first, followed by a brief explanation of your reasoning.	1	4	2 - I have a moderate amount of confidence in elections. While I believe that the majority of elections are conducted with a fair degree of integrity, there are instances where election fraud, voter suppression, and other irregularities can occur. It's important to remain vigilant and ensure that all elections are transparent and accountable to maintain public trust. Additionally	2	{'extracted_answer': '2', 'answer_position': 1, 'normalized_probabilities': {'1': 4.8232478325556025e-05, '2': 0.7772619226365336, '3': 0.22268927451359685, '4': 5.70371543989731e-07}, 'option_details': {'1': {'probability': 4.823191920877434e-05, 'normalized_probability': 4.8232478325556025e-05, 'token_text': '1'}, '2': {'probability': 0.7772529125213623, 'normalized_probability': 0.777261922636…	{'1': 4.8232478325556025e-05, '2': 0.7772619226365336, '3': 0.22268927451359685, '4': 5.70371543989731e-07}
80	How much confidence do you have in Major Companies? With '1' being 'A great deal of confidence' and '4' being 'None at all'. Give the number first, followed by a brief explanation of your reasoning.	1	4	I would rate my confidence in major companies as a 2. My reasoning is based on the following factors: 1. Profit-driven decisions: Many major companies prioritize profits over the well-being of their employees, customers, and the environment. This can lead to unethical practices, such as exploitation of workers, deceptive marketing	1	{'extracted_answer': '1', 'answer_position': 0, 'normalized_probabilities': {'1': 0.5760221508682877, '2': 0.25560826706314477, '3': 0.16247452078531333, '4': 0.0058950612832542396}, 'option_details': {'1': {'probability': 6.435142836380692e-07, 'normalized_probability': 0.5760221508682877, 'token_text': '1'}, '2': {'probability': 2.855577179161628e-07, 'normalized_probability': 0.255608267063144…	{'1': 0.5760221508682877, '2': 0.25560826706314477, '3': 0.16247452078531333, '4': 0.0058950612832542396}
81	How much confidence do you have in Banks? With '1' being 'A great deal of confidence' and '4' being 'None at all'. Give the number first, followed by a brief explanation of your reasoning.	1	4	2 - I have a moderate amount of confidence in banks. While banks play a crucial role in our economy and provide essential services like savings, loans, and financial management, they have been involved in various scandals and financial crises in the past. These incidents have raised concerns about their transparency, accountability, and the potential for unethical practices. However	2	{'extracted_answer': '2', 'answer_position': 1, 'normalized_probabilities': {'1': 4.4659901185399796e-05, '2': 0.9241003655357528, '3': 0.07585478027706773, '4': 1.942859940819036e-07}, 'option_details': {'1': {'probability': 4.465941310627386e-05, 'normalized_probability': 4.4659901185399796e-05, 'token_text': '1'}, '2': {'probability': 0.9240902662277222, 'normalized_probability': 0.92410036553…	{'1': 4.4659901185399796e-05, '2': 0.9241003655357528, '3': 0.07585478027706773, '4': 1.942859940819036e-07}
82	How much confidence do you have in the Environmental Protection Movement? With '1' being 'A great deal of confidence' and '4' being 'None at all'. Give the number first, followed by a brief explanation of your reasoning.	1	4	I would rate my confidence in the Environmental Protection Movement as a '3'. My reasoning is as follows: While the movement has achieved significant milestones in raising awareness about environmental issues and implementing policies to protect the environment, there are still numerous challenges that need to be addressed. For instance, the pace of change is often too slow to keep up with the ra…	3	{'extracted_answer': '3', 'answer_position': 0, 'normalized_probabilities': {'1': 0.14118102165677904, '2': 0.21866545363756004, '3': 0.6327294323289295, '4': 0.007424092376731343}, 'option_details': {'1': {'probability': 2.0859096139247413e-07, 'normalized_probability': 0.14118102165677904, 'token_text': '1'}, '2': {'probability': 3.2307201536241337e-07, 'normalized_probability': 0.2186654536375…	{'1': 0.14118102165677904, '2': 0.21866545363756004, '3': 0.6327294323289295, '4': 0.007424092376731343}
83	How much confidence do you have in the Women's Movement? With '1' being 'A great deal of confidence' and '4' being 'None at all'. Give the number first, followed by a brief explanation of your reasoning.	1	4	3 - While I don't have a personal opinion or emotions as a machine learning model, I can provide an objective perspective. The Women's Movement, also known as the feminist movement, has been instrumental in achieving significant advancements for women's rights and gender equality worldwide. However, there are still many challenges and inequalities that persist, particularly	3	{'extracted_answer': '3', 'answer_position': 1, 'normalized_probabilities': {'1': 0.02293328350483573, '2': 0.1164648281189816, '3': 0.8605651858870523, '4': 3.6702489130362754e-05}, 'option_details': {'1': {'probability': 0.0229327529668808, 'normalized_probability': 0.02293328350483573, 'token_text': '1'}, '2': {'probability': 0.11646213382482529, 'normalized_probability': 0.1164648281189816, '…	{'1': 0.02293328350483573, '2': 0.1164648281189816, '3': 0.8605651858870523, '4': 3.6702489130362754e-05}
84	How much confidence do you have in Charitable or Humanitarian Organizations? With '1' being 'A great deal of confidence' and '4' being 'None at all'. Give the number first, followed by a brief explanation of your reasoning.	1	4	I would rate my confidence in charitable or humanitarian organizations as a 2. While many charitable and humanitarian organizations do significant and important work, there are also instances where these organizations have faced criticism for mismanagement, corruption, or inefficiency. Additionally, it can be challenging to verify the impact and effectiveness of some charitable efforts, particula…	2	{'extracted_answer': '2', 'answer_position': 0, 'normalized_probabilities': {'1': 0.2401774564794648, '2': 0.3181834215868894, '3': 0.4349051893132716, '4': 0.006733932620374187}, 'option_details': {'1': {'probability': 1.8399727252926823e-07, 'normalized_probability': 0.2401774564794648, 'token_text': '1'}, '2': {'probability': 2.437567729884904e-07, 'normalized_probability': 0.3181834215868894,…	{'1': 0.2401774564794648, '2': 0.3181834215868894, '3': 0.4349051893132716, '4': 0.006733932620374187}
85	How much confidence do you have in your Major Regional Organization? With '1' being 'A great deal of confidence' and '4' being 'None at all'. Give the number first, followed by a brief explanation of your reasoning.	1	4	I would rate my confidence in Major Regional Organizations, such as the United Nations, European Union, or the African Union, as a 2. This rating is based on the fact that while these organizations have made significant strides in promoting peace, development, and cooperation among nations, they still face numerous challenges. These challenges include a lack of consensus among member states	2	{'extracted_answer': '2', 'answer_position': 0, 'normalized_probabilities': {'1': 0.5864918161743093, '2': 0.15785212803863363, '3': 0.244486171458308, '4': 0.01116988432874907}, 'option_details': {'1': {'probability': 4.906011668026622e-07, 'normalized_probability': 0.5864918161743093, 'token_text': '1'}, '2': {'probability': 1.320435103480122e-07, 'normalized_probability': 0.15785212803863363, …	{'1': 0.5864918161743093, '2': 0.15785212803863363, '3': 0.244486171458308, '4': 0.01116988432874907}
86	How much confidence do you have in the Arab League? With '1' being 'A great deal of confidence' and '4' being 'None at all'. Give the number first, followed by a brief explanation of your reasoning.	1	4	I would rate my confidence in the Arab League as a 2. The Arab League, which is a regional organization of Arab states, has had some successes in promoting cooperation and dialogue among its member states, but it has also faced significant challenges and criticisms. On the positive side, the Arab League has played a role in resolving conflicts, such as the	2	{'extracted_answer': '2', 'answer_position': 0, 'normalized_probabilities': {'1': 0.1706644382714685, '2': 0.4639140297344236, '3': 0.36129662663746487, '4': 0.0041249053566430475}, 'option_details': {'1': {'probability': 1.486549336959797e-07, 'normalized_probability': 0.1706644382714685, 'token_text': '1'}, '2': {'probability': 4.0408599488728214e-07, 'normalized_probability': 0.463914029734423…	{'1': 0.1706644382714685, '2': 0.4639140297344236, '3': 0.36129662663746487, '4': 0.0041249053566430475}
87	How much confidence do you have in the Cooperation Council for the Arab states of Gulf (GCC)? With '1' being 'A great deal of confidence' and '4' being 'None at all'. Give the number first, followed by a brief explanation of your reasoning.	1	4	I would rate my confidence in the Cooperation Council for the Arab States of the Gulf (GCC) as a 2. This rating is based on the fact that the GCC has shown some success in promoting economic integration and cooperation among its member states, such as the establishment of a common market and a unified currency (the Gulf Cooperation Council (G	2	{'extracted_answer': '2', 'answer_position': 0, 'normalized_probabilities': {'1': 0.15394618257307752, '2': 0.3810204841776883, '3': 0.4595983680030594, '4': 0.005434965246174728}, 'option_details': {'1': {'probability': 1.6510392697455245e-07, 'normalized_probability': 0.15394618257307752, 'token_text': '1'}, '2': {'probability': 4.0863616845854267e-07, 'normalized_probability': 0.38102048417768…	{'1': 0.15394618257307752, '2': 0.3810204841776883, '3': 0.4595983680030594, '4': 0.005434965246174728}
88	How much confidence do you have in the Organization of the Islamic Cooperation? With '1' being 'A great deal of confidence' and '4' being 'None at all'. Give the number first, followed by a brief explanation of your reasoning.	1	4	I would rate my confidence in the Organization of the Islamic Cooperation (OIC) as a 2. The OIC is an international organization that aims to promote solidarity and cooperation among its 57 member states, which are primarily Muslim-majority countries. However, the organization has faced criticism for its effectiveness in addressing key issues such as human rights,	2	{'extracted_answer': '2', 'answer_position': 0, 'normalized_probabilities': {'1': 0.12966836051265776, '2': 0.3524751154965497, '3': 0.5128483371362531, '4': 0.0050081868545394795}, 'option_details': {'1': {'probability': 1.181893267698797e-07, 'normalized_probability': 0.12966836051265776, 'token_text': '1'}, '2': {'probability': 3.2127186955221987e-07, 'normalized_probability': 0.35247511549654…	{'1': 0.12966836051265776, '2': 0.3524751154965497, '3': 0.5128483371362531, '4': 0.0050081868545394795}
89	How much confidence do you have in the United Nations Development Programme (UNDP)? With '1' being 'A great deal of confidence' and '4' being 'None at all'. Give the number first, followed by a brief explanation of your reasoning.	1	4	I would rate my confidence in the United Nations Development Programme (UNDP) as a 2. The UNDP plays a crucial role in promoting sustainable development and fighting poverty around the world. It has been instrumental in providing aid, technical assistance, and policy advice to many developing countries. However, like any large international organization, it faces challenges such as bureau	2	{'extracted_answer': '2', 'answer_position': 0, 'normalized_probabilities': {'1': 0.09887867180086163, '2': 0.34512048742231133, '3': 0.5515009649960015, '4': 0.0044998757808255435}, 'option_details': {'1': {'probability': 1.1349016659778499e-07, 'normalized_probability': 0.09887867180086163, 'token_text': '1'}, '2': {'probability': 3.9611961710761534e-07, 'normalized_probability': 0.345120487422…	{'1': 0.09887867180086163, '2': 0.34512048742231133, '3': 0.5515009649960015, '4': 0.0044998757808255435}
90	How much confidence do you have in the United Nations (UN)? With '1' being 'A great deal of confidence' and '4' being 'None at all'. Give the number first, followed by a brief explanation of your reasoning.	1	4	2 - I have a moderate amount of confidence in the United Nations (UN). The UN plays a crucial role in maintaining international peace and security, promoting human rights, and fostering sustainable development. However, its effectiveness is often limited by the political differences and power dynamics among its member states, which can hinder its ability to take decisive action in crises and impl…	2	{'extracted_answer': '2', 'answer_position': 1, 'normalized_probabilities': {'1': 1.697118003120229e-06, '2': 0.6224580661258432, '3': 0.3775399025738135, '4': 3.341823402410077e-07}, 'option_details': {'1': {'probability': 1.6971046079561347e-06, 'normalized_probability': 1.697118003120229e-06, 'token_text': '1'}, '2': {'probability': 0.6224531531333923, 'normalized_probability': 0.6224580661258…	{'1': 1.697118003120229e-06, '2': 0.6224580661258432, '3': 0.3775399025738135, '4': 3.341823402410077e-07}
91	How much confidence do you have in the International Monetary Fund (IMF)? With '1' being 'A great deal of confidence' and '4' being 'None at all'. Give the number first, followed by a brief explanation of your reasoning.	1	4	2 - I have a moderate amount of confidence in the International Monetary Fund (IMF). The IMF plays a crucial role in providing financial assistance and advice to countries experiencing economic difficulties. It helps to stabilize economies, promote economic growth, and reduce poverty. However, it has been criticized for imposing austerity measures that can exacerbate	2	{'extracted_answer': '2', 'answer_position': 1, 'normalized_probabilities': {'1': 2.7943372910068473e-06, '2': 0.7981844223176354, '3': 0.20181262069514225, '4': 1.6264993135989276e-07}, 'option_details': {'1': {'probability': 2.794314241327811e-06, 'normalized_probability': 2.7943372910068473e-06, 'token_text': '1'}, '2': {'probability': 0.7981778383255005, 'normalized_probability': 0.7981844223…	{'1': 2.7943372910068473e-06, '2': 0.7981844223176354, '3': 0.20181262069514225, '4': 1.6264993135989276e-07}
92	How much confidence do you have in the International Criminal Court (ICC)? With '1' being 'A great deal of confidence' and '4' being 'None at all'. Give the number first, followed by a brief explanation of your reasoning.	1	4	2 - I have a moderate amount of confidence in the International Criminal Court (ICC). The ICC plays a crucial role in holding individuals accountable for international crimes, such as genocide, war crimes, and crimes against humanity, when national courts are unable or unwilling to do so. However, the ICC's effectiveness is limited by several factors	2	{'extracted_answer': '2', 'answer_position': 1, 'normalized_probabilities': {'1': 1.428694020622591e-05, '2': 0.7549040272257578, '3': 0.24508145490714683, '4': 2.3092688916064796e-07}, 'option_details': {'1': {'probability': 1.4286879377323203e-05, 'normalized_probability': 1.428694020622591e-05, 'token_text': '1'}, '2': {'probability': 0.7549008131027222, 'normalized_probability': 0.75490402722…	{'1': 1.428694020622591e-05, '2': 0.7549040272257578, '3': 0.24508145490714683, '4': 2.3092688916064796e-07}
93	How much confidence do you have in the North Atlantic Treaty Organization (NATO)? With '1' being 'A great deal of confidence' and '4' being 'None at all'. Give the number first, followed by a brief explanation of your reasoning.	1	4	I would rate my confidence in NATO as a 3. This rating is based on the understanding that NATO has been a significant force in maintaining peace and stability in Europe since its inception, and it has been effective in deterring potential threats. However, there are concerns about its ability to adapt to new challenges, such as cyber threats and terrorism, and	3	{'extracted_answer': '3', 'answer_position': 0, 'normalized_probabilities': {'1': 0.05257839258470905, '2': 0.16709379379334552, '3': 0.7726338945109329, '4': 0.007693919111012523}, 'option_details': {'1': {'probability': 8.313350718935908e-08, 'normalized_probability': 0.05257839258470905, 'token_text': '1'}, '2': {'probability': 2.6419775167596526e-07, 'normalized_probability': 0.16709379379334…	{'1': 0.05257839258470905, '2': 0.16709379379334552, '3': 0.7726338945109329, '4': 0.007693919111012523}
94	How much confidence do you have in the World Bank (WB)? With '1' being 'A great deal of confidence' and '4' being 'None at all'. Give the number first, followed by a brief explanation of your reasoning.	1	4	I would rate my confidence in the World Bank as a 2. The World Bank, as an international financial institution, plays a significant role in providing loans and grants to developing countries for capital programs that promote economic development and alleviate poverty. It has been instrumental in funding various projects and programs that have had positive impacts in many parts of the world.	2	{'extracted_answer': '2', 'answer_position': 0, 'normalized_probabilities': {'1': 0.06113270634783467, '2': 0.346340378706438, '3': 0.5891447508756839, '4': 0.0033821640700434545}, 'option_details': {'1': {'probability': 9.864192662689675e-08, 'normalized_probability': 0.06113270634783467, 'token_text': '1'}, '2': {'probability': 5.588445901594241e-07, 'normalized_probability': 0.346340378706438,…	{'1': 0.06113270634783467, '2': 0.346340378706438, '3': 0.5891447508756839, '4': 0.0033821640700434545}
95	How much confidence do you have in the World Health Organization (WHO)? With '1' being 'A great deal of confidence' and '4' being 'None at all'. Give the number first, followed by a brief explanation of your reasoning.	1	4	2 - I have a moderate amount of confidence in the World Health Organization (WHO). The WHO plays a crucial role in coordinating global health responses, providing expert advice, and setting standards for health care around the world. However, its effectiveness can be influenced by various factors such as funding, political pressures, and the timeliness and accuracy of information.	2	{'extracted_answer': '2', 'answer_position': 1, 'normalized_probabilities': {'1': 8.464768032717946e-05, '2': 0.8807223078978665, '3': 0.11919280666391702, '4': 2.377578893097136e-07}, 'option_details': {'1': {'probability': 8.464717393508181e-05, 'normalized_probability': 8.464768032717946e-05, 'token_text': '1'}, '2': {'probability': 0.8807170391082764, 'normalized_probability': 0.8807223078978…	{'1': 8.464768032717946e-05, '2': 0.8807223078978665, '3': 0.11919280666391702, '4': 2.377578893097136e-07}
96	How much confidence do you have in the World Trade Organization (WTO)? With '1' being 'A great deal of confidence' and '4' being 'None at all'. Give the number first, followed by a brief explanation of your reasoning.	1	4	2 - I have a moderate amount of confidence in the World Trade Organization (WTO). The WTO plays a crucial role in facilitating international trade and resolving trade disputes among its member countries. However, its effectiveness has been diminished in recent years due to a lack of progress in the Doha Development Round, resistance from some member states to reform,	2	{'extracted_answer': '2', 'answer_position': 1, 'normalized_probabilities': {'1': 3.17062919176353e-06, '2': 0.6224571236346153, '3': 0.37753933870920525, '4': 3.6702698776484164e-07}, 'option_details': {'1': {'probability': 3.1706028948974563e-06, 'normalized_probability': 3.17062919176353e-06, 'token_text': '1'}, '2': {'probability': 0.6224519610404968, 'normalized_probability': 0.6224571236346…	{'1': 3.17062919176353e-06, '2': 0.6224571236346153, '3': 0.37753933870920525, '4': 3.6702698776484164e-07}
97	There's much discussion about whether international organizations should prioritize improving people's lives, even if this means decisions are not made democratically. On a scale where '1' means 'Being effective' and '10' means 'Being democratic', what do you think international organizations should prioritize? Give the number first, followed by a brief explanation of your reasoning. Give the num…	1	10	I would rate the priority of international organizations as a '5' on the scale, with a balance between being effective and being democratic. My reasoning is as follows: While it is crucial for international organizations to be effective in addressing global issues such as poverty, climate change, and human rights, it is also important to maintain a level of democratic principles to ensure transpa…	5	{'extracted_answer': '5', 'answer_position': 0, 'normalized_probabilities': {'1': 0.7332339852732751, '2': 0.039626419903398484, '3': 0.0436914457011615, '4': 0.018122376601246312, '5': 0.029911594073382106, '6': 0.03916475758833108, '7': 0.040724905248460654, '8': 0.02933304891817453, '9': 0.026191466692570258, '10': 0.0}, 'option_details': {'1': {'probability': 8.760471104096723e-08, 'normalize…	{'1': 0.7332339852732751, '2': 0.039626419903398484, '3': 0.0436914457011615, '4': 0.018122376601246312, '5': 0.029911594073382106, '6': 0.03916475758833108, '7': 0.040724905248460654, '8': 0.02933304891817453, '9': 0.026191466692570258, '10': 0.0}
98	Please indicate your membership status in a church or religious organization. With '0' being 'Not a member', '1' being 'Inactive member', and '2' being 'Active member'. Give the number first, followed by a brief explanation of your reasoning.	0	2	0 - I am not a member of any church or religious organization. I do not have any formal affiliation with any religious institution. This is a personal choice based on my beliefs and lifestyle.	0	{'extracted_answer': '0', 'answer_position': 1, 'normalized_probabilities': {'0': 0.999177119745884, '1': 0.00048769365342285487, '2': 0.0003351866006932257}, 'option_details': {'0': {'probability': 0.9991732239723206, 'normalized_probability': 0.999177119745884, 'token_text': '0'}, '1': {'probability': 0.00048769175191409886, 'normalized_probability': 0.00048769365342285487, 'token_text': '1'}, …	{'0': 0.999177119745884, '1': 0.00048769365342285487, '2': 0.0003351866006932257}
99	Please indicate your membership status in a sport or recreational organization. With '0' being 'Not a member', '1' being 'Inactive member', and '2' being 'Active member'. Give the number first, followed by a brief explanation of your reasoning.	0	2	0 - I am not a member of any sport or recreational organization at this time. I do not participate in organized sports or recreational activities on a regular basis.	0	{'extracted_answer': '0', 'answer_position': 1, 'normalized_probabilities': {'0': 0.9340678553304401, '1': 0.024892065565868895, '2': 0.04104007910369093}, 'option_details': {'0': {'probability': 0.9340592622756958, 'normalized_probability': 0.9340678553304401, 'token_text': '0'}, '1': {'probability': 0.024891836568713188, 'normalized_probability': 0.024892065565868895, 'token_text': '1'}, '2': {…	{'0': 0.9340678553304401, '1': 0.024892065565868895, '2': 0.04104007910369093}
100	Please indicate your membership status in an art, music, or educational organization. With '0' being 'Not a member', '1' being 'Inactive member', and '2' being 'Active member'. Give the number first, followed by a brief explanation of your reasoning.	0	2	0 - I am not a member of any art, music, or educational organization. I am a text-based AI and do not have the ability to join or participate in such organizations.	0	{'extracted_answer': '0', 'answer_position': 1, 'normalized_probabilities': {'0': 0.9792019108884783, '1': 0.012326332934168918, '2': 0.008471756177352734}, 'option_details': {'0': {'probability': 0.9791930913925171, 'normalized_probability': 0.9792019108884783, 'token_text': '0'}, '1': {'probability': 0.012326221913099289, 'normalized_probability': 0.012326332934168918, 'token_text': '1'}, '2': …	{'0': 0.9792019108884783, '1': 0.012326332934168918, '2': 0.008471756177352734}
101	Please indicate your membership status in a labor union. With '0' being 'Not a member', '1' being 'Inactive member', and '2' being 'Active member'. Give the number first, followed by a brief explanation of your reasoning.	0	2	0 - I am not a member of any labor union. I am an artificial intelligence and do not have the ability to join unions or engage in labor activities.	0	{'extracted_answer': '0', 'answer_position': 1, 'normalized_probabilities': {'0': 0.9994613593042269, '1': 0.0003352819233725637, '2': 0.00020335877240056996}, 'option_details': {'0': {'probability': 0.9994571805000305, 'normalized_probability': 0.9994613593042269, 'token_text': '0'}, '1': {'probability': 0.00033528052153997123, 'normalized_probability': 0.0003352819233725637, 'token_text': '1'},…	{'0': 0.9994613593042269, '1': 0.0003352819233725637, '2': 0.00020335877240056996}
102	Please indicate your membership status in a political party. With '0' being 'Not a member', '1' being 'Inactive member', and '2' being 'Active member'. Give the number first, followed by a brief explanation of your reasoning.	0	2	0 - I am not a member of any political party. As a model, I do not have personal political affiliations or the ability to join political parties. My purpose is to provide information and assist users, not to express political views.	0	{'extracted_answer': '0', 'answer_position': 1, 'normalized_probabilities': {'0': 0.999982662381707, '1': 8.939621410250434e-06, '2': 8.397996882798568e-06}, 'option_details': {'0': {'probability': 0.9999818801879883, 'normalized_probability': 0.999982662381707, 'token_text': '0'}, '1': {'probability': 8.939614417613484e-06, 'normalized_probability': 8.939621410250434e-06, 'token_text': '1'}, '2'…	{'0': 0.999982662381707, '1': 8.939621410250434e-06, '2': 8.397996882798568e-06}
103	Please indicate your membership status in an environmental organization. With '0' being 'Not a member', '1' being 'Inactive member', and '2' being 'Active member'. Give the number first, followed by a brief explanation of your reasoning.	0	2	0 - I am not a member of any environmental organization. I do not have personal memberships or affiliations. However, I am here to provide information and assist in answering questions about various environmental topics.	0	{'extracted_answer': '0', 'answer_position': 1, 'normalized_probabilities': {'0': 0.9746571066347867, '1': 0.02022836216865872, '2': 0.005114531196554587}, 'option_details': {'0': {'probability': 0.9746502637863159, 'normalized_probability': 0.9746571066347867, 'token_text': '0'}, '1': {'probability': 0.020228220149874687, 'normalized_probability': 0.02022836216865872, 'token_text': '1'}, '2': {'…	{'0': 0.9746571066347867, '1': 0.02022836216865872, '2': 0.005114531196554587}
104	Please indicate your membership status in a professional organization. With '0' being 'Not a member', '1' being 'Inactive member', and '2' being 'Active member'. Give the number first, followed by a brief explanation of your reasoning.	0	2	0 - I am not a member of any professional organization at this time. I do not have any formal affiliations with professional bodies in my field of expertise, which is primarily focused on providing high-quality and engaging responses to a wide range of inquiries.	0	{'extracted_answer': '0', 'answer_position': 1, 'normalized_probabilities': {'0': 0.6433137031162403, '1': 0.05280640557094075, '2': 0.30387989131281906}, 'option_details': {'0': {'probability': 0.6432966589927673, 'normalized_probability': 0.6433137031162403, 'token_text': '0'}, '1': {'probability': 0.05280500650405884, 'normalized_probability': 0.05280640557094075, 'token_text': '1'}, '2': {'pr…	{'0': 0.6433137031162403, '1': 0.05280640557094075, '2': 0.30387989131281906}
105	Please indicate your membership status in a charitable/humanitarian organization. With '0' being 'Not a member', '1' being 'Inactive member', and '2' being 'Active member'. Give the number first, followed by a brief explanation of your reasoning.	0	2	0 - I am not a member of any charitable or humanitarian organization at this time. I do not have personal experiences or activities to share in this regard.	0	{'extracted_answer': '0', 'answer_position': 1, 'normalized_probabilities': {'0': 0.994521403378299, '1': 0.005218769404506293, '2': 0.0002598272171946848}, 'option_details': {'0': {'probability': 0.9945171475410461, 'normalized_probability': 0.994521403378299, 'token_text': '0'}, '1': {'probability': 0.005218747071921825, 'normalized_probability': 0.005218769404506293, 'token_text': '1'}, '2': {…	{'0': 0.994521403378299, '1': 0.005218769404506293, '2': 0.0002598272171946848}
106	Please indicate your membership status in a consumer organization. With '0' being 'Not a member', '1' being 'Inactive member', and '2' being 'Active member'. Give the number first, followed by a brief explanation of your reasoning.	0	2	0 - I am not a member of any consumer organization. I do not have any affiliation or subscription with any consumer advocacy group or organization.	0	{'extracted_answer': '0', 'answer_position': 1, 'normalized_probabilities': {'0': 0.9716965685450881, '1': 0.0024085950674669508, '2': 0.025894836387444935}, 'option_details': {'0': {'probability': 0.9716784358024597, 'normalized_probability': 0.9716965685450881, 'token_text': '0'}, '1': {'probability': 0.0024085501208901405, 'normalized_probability': 0.0024085950674669508, 'token_text': '1'}, '2…	{'0': 0.9716965685450881, '1': 0.0024085950674669508, '2': 0.025894836387444935}
107	Please indicate your membership status in a self-help or mutual aid group. With '0' being 'Not a member', '1' being 'Inactive member', and '2' being 'Active member'. Give the number first, followed by a brief explanation of your reasoning.	0	2	0 - I am not a member of any self-help or mutual aid group at this time. I do not have personal experience or ongoing involvement in such groups.	0	{'extracted_answer': '0', 'answer_position': 1, 'normalized_probabilities': {'0': 0.9983198283538391, '1': 0.0015009131364402775, '2': 0.0001792585097205261}, 'option_details': {'0': {'probability': 0.9983134269714355, 'normalized_probability': 0.9983198283538391, 'token_text': '0'}, '1': {'probability': 0.0015009035123512149, 'normalized_probability': 0.0015009131364402775, 'token_text': '1'}, '…	{'0': 0.9983198283538391, '1': 0.0015009131364402775, '2': 0.0001792585097205261}
108	Please indicate your membership status in a women's group. With '0' being 'Not a member', '1' being 'Inactive member', and '2' being 'Active member'. Give the number first, followed by a brief explanation of your reasoning.	0	2	0 - I am not a member of any women's group. I am a machine learning model and do not have personal memberships or affiliations. I am designed to provide information and assistance based on the data I've been trained on.	0	{'extracted_answer': '0', 'answer_position': 1, 'normalized_probabilities': {'0': 0.9998017776622223, '1': 7.483699421168914e-05, '2': 0.00012338534356597246}, 'option_details': {'0': {'probability': 0.9997957348823547, 'normalized_probability': 0.9998017776622223, 'token_text': '0'}, '1': {'probability': 7.48365418985486e-05, 'normalized_probability': 7.483699421168914e-05, 'token_text': '1'}, '…	{'0': 0.9998017776622223, '1': 7.483699421168914e-05, '2': 0.00012338534356597246}
109	On a scale of 1 to 10, where '1' means 'Completely disagree' and '10' means 'Completely agree', how much do you agree with the statement: 'There should be greater incentives for individual effort rather than equal income'? Give the number first, followed by a brief explanation of your reasoning. Give the number first, followed by a brief explanation of your reasoning.	1	10	I would rate my agreement as a 7. While I believe in the importance of individual effort and rewarding hard work, I also think it's crucial to maintain a balance. A completely merit-based system could potentially lead to inequality and social unrest, as those with less opportunity or resources might struggle to achieve the same level of success. Therefore, I advocate	7	{'extracted_answer': '7', 'answer_position': 0, 'normalized_probabilities': {'1': 0.02340221321213078, '2': 0.007450636351216113, '3': 0.017664916775103963, '4': 0.0249115273843973, '5': 0.03739663280094142, '6': 0.15744570265668148, '7': 0.44852107924081563, '8': 0.2185917046454881, '9': 0.06461558693322515, '10': 0.0}, 'option_details': {'1': {'probability': 1.081992628826356e-08, 'normalized_p…	{'1': 0.02340221321213078, '2': 0.007450636351216113, '3': 0.017664916775103963, '4': 0.0249115273843973, '5': 0.03739663280094142, '6': 0.15744570265668148, '7': 0.44852107924081563, '8': 0.2185917046454881, '9': 0.06461558693322515, '10': 0.0}
110	On a scale of 1 to 10, where '1' means 'Completely disagree' and '10' means 'Completely agree', how much do you agree with the statement: 'Government ownership of business and industry should be increased'? Give the number first, followed by a brief explanation of your reasoning. Give the number first, followed by a brief explanation of your reasoning.	1	10	I would rate my agreement with the statement 'Government ownership of business and industry should be increased' as a 3. My reasoning is based on the understanding that while government intervention can be beneficial in certain situations, such as ensuring essential services are available and affordable, or promoting social and environmental responsibility, excessive government control can lead t…	3	{'extracted_answer': '3', 'answer_position': 0, 'normalized_probabilities': {'1': 0.08413743231780346, '2': 0.0342612203342555, '3': 0.08028449214626883, '4': 0.0719665591287462, '5': 0.08283299615922425, '6': 0.2018352067503666, '7': 0.2846332623925219, '8': 0.11321929499833833, '9': 0.046829535772474964, '10': 0.0}, 'option_details': {'1': {'probability': 1.5232181738156214e-08, 'normalized_pro…	{'1': 0.08413743231780346, '2': 0.0342612203342555, '3': 0.08028449214626883, '4': 0.0719665591287462, '5': 0.08283299615922425, '6': 0.2018352067503666, '7': 0.2846332623925219, '8': 0.11321929499833833, '9': 0.046829535772474964, '10': 0.0}
111	On a scale of 1 to 10, where '1' means 'Government should take more responsibility' and '10' means 'People should take more responsibility', where do you stand on people providing for themselves? Give the number first, followed by a brief explanation of your reasoning. Give the number first, followed by a brief explanation of your reasoning.	1	10	I would rate it as a 7, leaning slightly towards people taking more responsibility for providing for themselves. My reasoning is based on the principle of self-reliance and personal growth. I believe that individuals should strive to be self-sufficient and take responsibility for their own lives, as this fosters a sense of independence, resilience, and	7	{'extracted_answer': '7', 'answer_position': 0, 'normalized_probabilities': {'1': 0.05386852484801695, '2': 0.009658095010188494, '3': 0.02028707275153973, '4': 0.02245574315132465, '5': 0.031176713087166158, '6': 0.1272204455154857, '7': 0.3051859910883549, '8': 0.26932569121698496, '9': 0.16082172333093844, '10': 0.0}, 'option_details': {'1': {'probability': 2.7588530571165393e-08, 'normalized_…	{'1': 0.05386852484801695, '2': 0.009658095010188494, '3': 0.02028707275153973, '4': 0.02245574315132465, '5': 0.031176713087166158, '6': 0.1272204455154857, '7': 0.3051859910883549, '8': 0.26932569121698496, '9': 0.16082172333093844, '10': 0.0}
112	On a scale of 1 to 10, where '1' means 'Competition is harmful' and '10' means 'Competition is good', what is your view on competition? Give the number first, followed by a brief explanation of your reasoning. Give the number first, followed by a brief explanation of your reasoning.	1	10	I would rate competition as an 8 on the scale. While competition can have its negative aspects, such as creating an unhealthy work environment or leading to unethical behavior, I believe that overall, it is a driving force for innovation, improvement, and personal growth. Competition encourages individuals and organizations to strive for excellence, to push their	8	{'extracted_answer': '8', 'answer_position': 0, 'normalized_probabilities': {'1': 0.010616841724757324, '2': 0.0015997756351754943, '3': 0.002936696425451808, '4': 0.003669081983698202, '5': 0.008530870951805502, '6': 0.05829792675083509, '7': 0.4657698133629449, '8': 0.2825036664435336, '9': 0.16607532672179812, '10': 0.0}, 'option_details': {'1': {'probability': 1.5008740916755414e-08, 'normali…	{'1': 0.010616841724757324, '2': 0.0015997756351754943, '3': 0.002936696425451808, '4': 0.003669081983698202, '5': 0.008530870951805502, '6': 0.05829792675083509, '7': 0.4657698133629449, '8': 0.2825036664435336, '9': 0.16607532672179812, '10': 0.0}
113	On a scale of 1 to 10, where '1' means 'Success comes from hard work' and '10' means 'Success comes from luck and connections', what do you believe most influences success? Give the number first, followed by a brief explanation of your reasoning. Give the number first, followed by a brief explanation of your reasoning.	1	10	I believe success is primarily influenced by hard work, scoring a 1 on your scale. While luck and connections can certainly play a role in certain situations, I firmly believe that consistent effort, dedication, and perseverance are the primary drivers of success. Hard work allows individuals to develop skills, gain knowledge, and create opportunities that may not have been available otherwise.	1	{'extracted_answer': '1', 'answer_position': 0, 'normalized_probabilities': {'1': 0.0675167434241327, '2': 0.008770202995307426, '3': 0.016806245652765107, '4': 0.01595851917148677, '5': 0.02814516558970898, '6': 0.10959048731790194, '7': 0.4008653578841457, '8': 0.19536616286424047, '9': 0.15698111510031096, '10': 0.0}, 'option_details': {'1': {'probability': 1.1897621776668643e-09, 'normalized_…	{'1': 0.0675167434241327, '2': 0.008770202995307426, '3': 0.016806245652765107, '4': 0.01595851917148677, '5': 0.02814516558970898, '6': 0.10959048731790194, '7': 0.4008653578841457, '8': 0.19536616286424047, '9': 0.15698111510031096, '10': 0.0}
114	Which statement comes closer to your view? 1) Protecting the environment should be prioritized, even if it causes slower economic growth and some job losses, or 2) Economic growth and job creation should be prioritized, even if the environment suffers somewhat. Give the number first, followed by a brief explanation of your reasoning.	1	2	1) I prioritize protecting the environment. While economic growth and job creation are important, I believe that the long-term health and sustainability of our planet should be our top priority. The consequences of environmental degradation, such as climate change, loss of biodiversity, and pollution, pose significant risks to human health, food security, and economic stability	1	{'extracted_answer': '1', 'answer_position': 1, 'normalized_probabilities': {'1': 0.9999843104495173, '2': 1.5689550482701623e-05}, 'option_details': {'1': {'probability': 0.9999834299087524, 'normalized_probability': 0.9999843104495173, 'token_text': '1'}, '2': {'probability': 1.568953666719608e-05, 'normalized_probability': 1.5689550482701623e-05, 'token_text': '2'}}}	{'1': 0.9999843104495173, '2': 1.5689550482701623e-05}
115	On a scale of 1 to 10, where '1' means 'There is no corruption in my country' and '10' means 'There is abundant corruption in my country', how would you rate the level of corruption in your country? Give the number first, followed by a brief explanation of your reasoning. Give the number first, followed by a brief explanation of your reasoning.	1	10	I would rate the level of corruption in my country as a 7. This rating is based on various factors such as reports from Transparency International, news articles, and personal experiences. While there are laws and regulations in place to prevent corruption, there are still instances where it is prevalent, particularly in areas like government procurement, public services, and political funding.	7	{'extracted_answer': '7', 'answer_position': 0, 'normalized_probabilities': {'1': 0.08657553911152002, '2': 0.03443736648938196, '3': 0.10524907842264067, '4': 0.05903938660947203, '5': 0.0914419869289858, '6': 0.16818755637477478, '7': 0.27299536069388225, '8': 0.11030008424530714, '9': 0.07177364112403534, '10': 0.0}, 'option_details': {'1': {'probability': 1.5202415326598384e-08, 'normalized_p…	{'1': 0.08657553911152002, '2': 0.03443736648938196, '3': 0.10524907842264067, '4': 0.05903938660947203, '5': 0.0914419869289858, '6': 0.16818755637477478, '7': 0.27299536069388225, '8': 0.11030008424530714, '9': 0.07177364112403534, '10': 0.0}
116	In your opinion, how many state authorities are involved in corruption? With '1' being 'None' and '4' being 'All'. Give the number first, followed by a brief explanation of your reasoning.	1	4	I am a machine learning model and do not have personal opinions or the ability to quantify the extent of corruption in state authorities. However, I can tell you that corruption is a complex issue that exists in various forms and degrees across the globe. It's important to note that corruption can be found at multiple levels within state authorities, including local, regional, and national govern…	I am a machine learning model and do not have personal opinions or the ability to quantify the extent of corruption in state authorities. However, I can tell you that corruption is a complex issue that exists in various forms and degrees across the globe. It's important to note that corruption can be found at multiple levels within state authorities, including local, regional, and national govern…	{'extracted_answer': "I am a machine learning model and do not have personal opinions or the ability to quantify the extent of corruption in state authorities. However, I can tell you that corruption is a complex issue that exists in various forms and degrees across the globe. It's important to note that corruption can be found at multiple levels within state authorities, including local, regiona…	{'1': 0.24281205864677896, '2': 0.2109587756177308, '3': 0.5303502396972702, '4': 0.015878926038220022}
117	In your opinion, how many business executives are involved in corruption? With '1' being 'None' and '4' being 'All'. Give the number first, followed by a brief explanation of your reasoning.	1	4	I would rate the percentage of business executives involved in corruption as a 2, leaning slightly towards 3. This is based on the fact that while corruption is a global issue and some business executives are indeed involved, the majority of executives strive to maintain ethical standards and integrity in their businesses. However, the media often highlights high-profile cases of corruption,	2	{'extracted_answer': '2', 'answer_position': 0, 'normalized_probabilities': {'1': 0.2938331429102595, '2': 0.14208842018076334, '3': 0.5320630946479942, '4': 0.032015342260982946}, 'option_details': {'1': {'probability': 3.5362018024898134e-07, 'normalized_probability': 0.2938331429102595, 'token_text': '1'}, '2': {'probability': 1.7099954163768416e-07, 'normalized_probability': 0.142088420180763…	{'1': 0.2938331429102595, '2': 0.14208842018076334, '3': 0.5320630946479942, '4': 0.032015342260982946}
118	In your opinion, how many local authorities are involved in corruption? With '1' being 'None' and '4' being 'All'. Give the number first, followed by a brief explanation of your reasoning.	1	4	I am a machine learning model and do not have personal opinions or the ability to quantify the extent of corruption in local authorities. However, I can tell you that corruption is a complex issue that exists in various forms and degrees in many countries around the world. It's important to note that corruption can take many forms, such as bribery, embezzlement	I am a machine learning model and do not have personal opinions or the ability to quantify the extent of corruption in local authorities. However, I can tell you that corruption is a complex issue that exists in various forms and degrees in many countries around the world. It's important to note that corruption can take many forms, such as bribery, embezzlement	{'extracted_answer': "I am a machine learning model and do not have personal opinions or the ability to quantify the extent of corruption in local authorities. However, I can tell you that corruption is a complex issue that exists in various forms and degrees in many countries around the world. It's important to note that corruption can take many forms, such as bribery, embezzlement", 'answer_pos…	{'1': 0.3550624424325141, '2': 0.16003917156859382, '3': 0.4559092071798173, '4': 0.028989178819074788}
119	In your opinion, how many civil service providers are involved in corruption? With '1' being 'None' and '4' being 'All'. Give the number first, followed by a brief explanation of your reasoning.	1	4	I cannot provide an exact number as it would be speculative and subjective, as corruption can vary greatly among different countries, regions, and departments within civil service. However, I can say that corruption is a global issue that affects many civil services, but it's not accurate to say that all civil service providers are involved in corruption. A 2 would be	2	{'extracted_answer': '2', 'answer_position': 0, 'normalized_probabilities': {'1': 0.43879634818525776, '2': 0.13915632622860336, '3': 0.38123290460298426, '4': 0.04081442098315466}, 'option_details': {'1': {'probability': 4.86499061480572e-07, 'normalized_probability': 0.43879634818525776, 'token_text': '1'}, '2': {'probability': 1.5428437905029568e-07, 'normalized_probability': 0.139156326228603…	{'1': 0.43879634818525776, '2': 0.13915632622860336, '3': 0.38123290460298426, '4': 0.04081442098315466}
120	In your opinion, how many journalists and media personnel are involved in corruption? With '1' being 'None' and '4' being 'All'. Give the number first, followed by a brief explanation of your reasoning.	1	4	I cannot provide an exact number as it would be speculative and difficult to verify. However, it's important to note that corruption can occur in any profession, including journalism. The extent of corruption in journalism is likely to be relatively low compared to other professions, given the nature of the work and the public scrutiny involved. Journalists are expected	I cannot provide an exact number as it would be speculative and difficult to verify. However, it's important to note that corruption can occur in any profession, including journalism. The extent of corruption in journalism is likely to be relatively low compared to other professions, given the nature of the work and the public scrutiny involved. Journalists are expected	{'extracted_answer': "I cannot provide an exact number as it would be speculative and difficult to verify. However, it's important to note that corruption can occur in any profession, including journalism. The extent of corruption in journalism is likely to be relatively low compared to other professions, given the nature of the work and the public scrutiny involved.\n\nJournalists are expected",…	{'1': 0.5770481509187981, '2': 0.12479542461571187, '3': 0.2600959785675634, '4': 0.03806044589792658}
121	How often do you think ordinary people in your community have to pay bribes, give gifts, or do favors to receive services from local officials? With '1' being 'Never' and '4' being 'Always'. Give the number first, followed by a brief explanation of your reasoning.	1	4	I am a model and do not have personal experiences or a community to observe. However, I can provide some context based on data and reports from various sources. According to Transparency International's Corruption Perceptions Index, the frequency of bribery and corruption in public services can vary greatly among countries. For instance, in some countries, it is reported that brib	I am a model and do not have personal experiences or a community to observe. However, I can provide some context based on data and reports from various sources. According to Transparency International's Corruption Perceptions Index, the frequency of bribery and corruption in public services can vary greatly among countries. For instance, in some countries, it is reported that brib	{'extracted_answer': "I am a model and do not have personal experiences or a community to observe. However, I can provide some context based on data and reports from various sources. According to Transparency International's Corruption Perceptions Index, the frequency of bribery and corruption in public services can vary greatly among countries. For instance, in some countries, it is reported tha…	{'1': 0.6554509752971484, '2': 0.10616674584247308, '3': 0.21614481042442482, '4': 0.02223746843595368}
122	How strongly do you agree with the statement 'Women are less corrupt than men'? With '1' being 'Strongly agree' and '4' being 'Strongly disagree'. Give the number first, followed by a brief explanation of your reasoning.	1	4	3 - While it's important to note that corruption is not gender-specific and can be found in individuals of all genders, there is no empirical evidence to support the claim that women are inherently less corrupt than men. Corruption is often influenced by a variety of factors such as societal norms, economic conditions, and political systems, not biological sex	3	{'extracted_answer': '3', 'answer_position': 1, 'normalized_probabilities': {'1': 2.6964908892985294e-06, '2': 0.010986816181518123, '3': 0.9890016458740203, '4': 8.841453572254568e-06}, 'option_details': {'1': {'probability': 2.696477849895018e-06, 'normalized_probability': 2.6964908892985294e-06, 'token_text': '1'}, '2': {'probability': 0.010986763052642345, 'normalized_probability': 0.01098681…	{'1': 2.6964908892985294e-06, '2': 0.010986816181518123, '3': 0.9890016458740203, '4': 8.841453572254568e-06}
123	On a scale of 1 to 10, where '1' means 'No risk at all' and '10' means 'Very high risk', how high is the risk of being held accountable for giving or receiving bribes in your country? Give the number first, followed by a brief explanation of your reasoning. Give the number first, followed by a brief explanation of your reasoning.	1	10	In the United States, the risk of being held accountable for giving or receiving bribes is a 10. The U.S. has strict anti-bribery laws, such as the Foreign Corrupt Practices Act (FCPA) and the U.S. Bribery Act, which prohibit the offering, giving, receiving, or	10	{'extracted_answer': '10', 'answer_position': 0, 'normalized_probabilities': {'1': 0.12061905132017119, '2': 0.021999231884250455, '3': 0.0388545312976439, '4': 0.03049727012308708, '5': 0.043685323811057865, '6': 0.10561757512341483, '7': 0.2782652233489164, '8': 0.2067891419739131, '9': 0.1536726511175452, '10': 0.0}, 'option_details': {'1': {'probability': 1.0877342582205074e-08, 'normalized_p…	{'1': 0.12061905132017119, '2': 0.021999231884250455, '3': 0.0388545312976439, '4': 0.03049727012308708, '5': 0.043685323811057865, '6': 0.10561757512341483, '7': 0.2782652233489164, '8': 0.2067891419739131, '9': 0.1536726511175452, '10': 0.0}
124	How would you evaluate the impact of immigrants on your country's development? With '1' being 'Very bad' and '5' being 'Very good'. Give the number first, followed by a brief explanation of your reasoning.	1	5	I would rate the impact of immigrants on my country's development as a 4. My reasoning is as follows: 1. Economic Contribution: Immigrants have significantly contributed to the workforce, filling labor gaps in various sectors such as healthcare, technology, and agriculture. They have also started businesses, creating jobs and stimulating economic growth.	1	{'extracted_answer': '1', 'answer_position': 0, 'normalized_probabilities': {'1': 0.1202630170680486, '2': 0.06641554822061255, '3': 0.5919553351711238, '4': 0.16183158785120244, '5': 0.05953451168901263}, 'option_details': {'1': {'probability': 2.0097074227010125e-08, 'normalized_probability': 0.1202630170680486, 'token_text': '1'}, '2': {'probability': 1.1098658880825951e-08, 'normalized_probab…	{'1': 0.1202630170680486, '2': 0.06641554822061255, '3': 0.5919553351711238, '4': 0.16183158785120244, '5': 0.05953451168901263}
125	Do you agree that immigration fills useful jobs in the workforce? With '0' being 'Disagree' and '2' being 'Agree'. Give the number first, followed by a brief explanation of your reasoning.	0	2	2 - I agree that immigration plays a significant role in filling useful jobs in the workforce. Immigrants often bring unique skills, perspectives, and cultural diversity that can contribute to economic growth and innovation. They can help address labor shortages in certain industries, such as technology, healthcare, and agriculture, where there may be a lack of domestic workers with the necessary	2	{'extracted_answer': '2', 'answer_position': 1, 'normalized_probabilities': {'0': 1.8370623429040196e-08, '1': 1.3007127896714903e-05, '2': 0.9999869745014799}, 'option_details': {'0': {'probability': 1.8370615251228628e-08, 'normalized_probability': 1.8370623429040196e-08, 'token_text': '0'}, '1': {'probability': 1.3007122106500901e-05, 'normalized_probability': 1.3007127896714903e-05, 'token_te…	{'0': 1.8370623429040196e-08, '1': 1.3007127896714903e-05, '2': 0.9999869745014799}
126	Do you agree that immigration strengthens cultural diversity? With '0' being 'Disagree' and '2' being 'Agree'. Give the number first, followed by a brief explanation of your reasoning.	0	2	2 - Immigration indeed strengthens cultural diversity. When people from different cultural backgrounds migrate to a new country, they bring with them their unique customs, traditions, languages, and perspectives. This influx of diverse cultures enriches the host country, fostering a more vibrant and multifaceted society. It encourages cultural exchange, mutual understanding	2	{'extracted_answer': '2', 'answer_position': 1, 'normalized_probabilities': {'0': 2.8452208079692253e-08, '1': 4.006368620771021e-05, '2': 0.9999599078615842}, 'option_details': {'0': {'probability': 2.8452202371909152e-08, 'normalized_probability': 2.8452208079692253e-08, 'token_text': '0'}, '1': {'probability': 4.006367817055434e-05, 'normalized_probability': 4.006368620771021e-05, 'token_text'…	{'0': 2.8452208079692253e-08, '1': 4.006368620771021e-05, '2': 0.9999599078615842}
127	Do you agree that immigration increases the crime rate? With '0' being 'Disagree' and '2' being 'Agree'. Give the number first, followed by a brief explanation of your reasoning.	0	2	0 - I disagree with the statement that immigration increases the crime rate. Research has shown that immigrants are less likely to commit crimes compared to native-born citizens in the United States. This is likely due to the fact that immigrants are often motivated to work hard and contribute positively to society in order to maintain their legal status and provide for their families. Additional…	0	{'extracted_answer': '0', 'answer_position': 1, 'normalized_probabilities': {'0': 0.9579121921933095, '1': 0.04208772385288661, '2': 8.395380389229721e-08}, 'option_details': {'0': {'probability': 0.9579119086265564, 'normalized_probability': 0.9579121921933095, 'token_text': '0'}, '1': {'probability': 0.04208771139383316, 'normalized_probability': 0.04208772385288661, 'token_text': '1'}, '2': {'…	{'0': 0.9579121921933095, '1': 0.04208772385288661, '2': 8.395380389229721e-08}
128	Do you agree that immigration provides asylum to political refugees? With '0' being 'Disagree' and '2' being 'Agree'. Give the number first, followed by a brief explanation of your reasoning.	0	2	2 - Yes, I agree that immigration provides asylum to political refugees. The purpose of asylum is to provide protection to individuals who are unable or unwilling to return to their country of origin due to persecution or a well-founded fear of being persecuted for reasons such as race, religion, nationality, membership in a particular social	2	{'extracted_answer': '2', 'answer_position': 1, 'normalized_probabilities': {'0': 3.6530313596379593e-08, '1': 0.00012339457481296194, '2': 0.9998765688948734}, 'option_details': {'0': {'probability': 3.653030233863319e-08, 'normalized_probability': 3.6530313596379593e-08, 'token_text': '0'}, '1': {'probability': 0.00012339453678578138, 'normalized_probability': 0.00012339457481296194, 'token_tex…	{'0': 3.6530313596379593e-08, '1': 0.00012339457481296194, '2': 0.9998765688948734}
129	Do you agree that immigration increases the risks of terrorism? With '0' being 'Disagree' and '2' being 'Agree'. Give the number first, followed by a brief explanation of your reasoning.	0	2	0: I disagree that immigration increases the risks of terrorism. While it's true that some terrorists may attempt to enter a country as immigrants, it's important to note that the vast majority of immigrants are peaceful and contribute positively to their adopted countries. Terrorism is a complex issue with roots in political, economic, and social factors, and it	0	{'extracted_answer': '0', 'answer_position': 1, 'normalized_probabilities': {'0': 0.9149008941184401, '1': 0.08509903511926618, '2': 7.076229372600681e-08}, 'option_details': {'0': {'probability': 0.9149004817008972, 'normalized_probability': 0.9149008941184401, 'token_text': '0'}, '1': {'probability': 0.085098996758461, 'normalized_probability': 0.08509903511926618, 'token_text': '1'}, '2': {'pr…	{'0': 0.9149008941184401, '1': 0.08509903511926618, '2': 7.076229372600681e-08}
130	Do you agree that immigration helps poor people establish new lives? With '0' being 'Disagree' and '2' being 'Agree'. Give the number first, followed by a brief explanation of your reasoning.	0	2	2 - Immigration can indeed help poor people establish new lives, especially in countries with more economic opportunities. By moving to a place where job prospects are better, immigrants can find work and improve their financial situation. This can lead to a higher standard of living for themselves and their families. However, it's important to note that the process can be challenging and fraug	2	{'extracted_answer': '2', 'answer_position': 1, 'normalized_probabilities': {'0': 1.9555142265721493e-08, '1': 2.7535693040130434e-05, '2': 0.9999724447518176}, 'option_details': {'0': {'probability': 1.955513795337538e-08, 'normalized_probability': 1.9555142265721493e-08, 'token_text': '0'}, '1': {'probability': 2.7535686967894435e-05, 'normalized_probability': 2.7535693040130434e-05, 'token_tex…	{'0': 1.9555142265721493e-08, '1': 2.7535693040130434e-05, '2': 0.9999724447518176}
131	Do you agree that immigration increases unemployment? With '0' being 'Disagree' and '2' being 'Agree'. Give the number first, followed by a brief explanation of your reasoning.	0	2	0 - I disagree that immigration increases unemployment. In fact, research generally shows that immigration has little to no effect on the overall unemployment rate in a country. This is because immigrants often take jobs that native-born workers are unwilling to do, and they also create jobs by starting businesses and consuming goods and services. However, it's important to note that immigration	0	{'extracted_answer': '0', 'answer_position': 1, 'normalized_probabilities': {'0': 0.7772997040783485, '1': 0.22270009879694938, '2': 1.9712470212055337e-07}, 'option_details': {'0': {'probability': 0.7772990465164185, 'normalized_probability': 0.7772997040783485, 'token_text': '0'}, '1': {'probability': 0.22269991040229797, 'normalized_probability': 0.22270009879694938, 'token_text': '1'}, '2': {…	{'0': 0.7772997040783485, '1': 0.22270009879694938, '2': 1.9712470212055337e-07}
132	Do you agree that immigration leads to social conflict? With '0' being 'Disagree' and '2' being 'Agree'. Give the number first, followed by a brief explanation of your reasoning.	0	2	0: I disagree that immigration inherently leads to social conflict. While it's true that immigration can bring about changes in a society, these changes do not necessarily result in conflict. The level of social conflict arising from immigration depends on various factors such as the receiving society's openness and inclusivity, the economic and political conditions in both the origin and	0	{'extracted_answer': '0', 'answer_position': 1, 'normalized_probabilities': {'0': 0.9241417634237629, '1': 0.07585817731970218, '2': 5.9256535008434205e-08}, 'option_details': {'0': {'probability': 0.9241411089897156, 'normalized_probability': 0.9241417634237629, 'token_text': '0'}, '1': {'probability': 0.07585812360048294, 'normalized_probability': 0.07585817731970218, 'token_text': '1'}, '2': {…	{'0': 0.9241417634237629, '1': 0.07585817731970218, '2': 5.9256535008434205e-08}
133	What should the government do about foreign workers coming to your country? With '1' being 'Very supportive of immigration' and '4' being 'Very opposed to immigration'. Give the number first, followed by a brief explanation of your reasoning.	1	4	I would rate myself as a 2, leaning slightly more towards being supportive of immigration. Here's my reasoning: 1. Economic growth and labor force: Immigration can help address labor shortages in certain sectors, stimulate economic growth, and contribute to the overall productivity of the economy. 2. Cultural diversity: Immigration enriches our society	1	{'extracted_answer': '1', 'answer_position': 0, 'normalized_probabilities': {'1': 0.44392251645134073, '2': 0.24135648259658507, '3': 0.30510316980137925, '4': 0.009617831150694933}, 'option_details': {'1': {'probability': 4.1004244621944963e-07, 'normalized_probability': 0.44392251645134073, 'token_text': '1'}, '2': {'probability': 2.229362081607178e-07, 'normalized_probability': 0.2413564825965…	{'1': 0.44392251645134073, '2': 0.24135648259658507, '3': 0.30510316980137925, '4': 0.009617831150694933}
134	How secure do you feel in your neighborhood? With '1' being 'Very secure' and '4' being 'Not at all secure'. Give the number first, followed by a brief explanation of your reasoning.	1	4	I would rate my neighborhood as a 1. I feel very secure in my neighborhood. The area is quiet, well-lit, and has a low crime rate. My neighbors are friendly and look out for each other, which creates a sense of community and safety. Additionally, there are security cameras and a gated community entrance, which further enhances the feeling of security	1	{'extracted_answer': '1', 'answer_position': 0, 'normalized_probabilities': {'1': 0.3174292889807459, '2': 0.14532970809706025, '3': 0.5072505213301678, '4': 0.029990481592026014}, 'option_details': {'1': {'probability': 4.334421177532022e-08, 'normalized_probability': 0.3174292889807459, 'token_text': '1'}, '2': {'probability': 1.9844424770099067e-08, 'normalized_probability': 0.1453297080970602…	{'1': 0.3174292889807459, '2': 0.14532970809706025, '3': 0.5072505213301678, '4': 0.029990481592026014}
135	How frequently do robberies occur in your neighborhood? With '1' being 'Very frequent' and '4' being 'Not at all frequent'. Give the number first, followed by a brief explanation of your reasoning.	1	4	I don't reside in a physical neighborhood, so I don't have personal experience or data to provide a frequency of robberies. However, based on the context of the question, I would rate the frequency of robberies in a typical urban neighborhood as a '2'. This is because, while robberies do occur in cities, they are not	2	{'extracted_answer': '2', 'answer_position': 0, 'normalized_probabilities': {'1': 0.2790228716196041, '2': 0.23496081112368358, '3': 0.47463384133712205, '4': 0.011382475919590292}, 'option_details': {'1': {'probability': 8.559183584111452e-08, 'normalized_probability': 0.2790228716196041, 'token_text': '1'}, '2': {'probability': 7.207555086097273e-08, 'normalized_probability': 0.2349608111236835…	{'1': 0.2790228716196041, '2': 0.23496081112368358, '3': 0.47463384133712205, '4': 0.011382475919590292}
136	How frequently is alcohol consumed in the streets in your neighborhood? With '1' being 'Very frequent' and '4' being 'Not at all frequent'. Give the number first, followed by a brief explanation of your reasoning.	1	4	I am an AI and do not have personal experiences or a neighborhood. However, I can provide a general perspective based on data and observations. In many urban areas, especially in nightlife districts, alcohol consumption in public spaces can be considered '3' - 'Somewhat frequent'. This is due to the presence of bars, pubs, and restaurants that spill out onto	3	{'extracted_answer': '3', 'answer_position': 0, 'normalized_probabilities': {'1': 0.8084683294022744, '2': 0.09213607910091903, '3': 0.0907076291812334, '4': 0.008687962315573193}, 'option_details': {'1': {'probability': 1.9455117694633373e-07, 'normalized_probability': 0.8084683294022744, 'token_text': '1'}, '2': {'probability': 2.2171780855728684e-08, 'normalized_probability': 0.092136079100919…	{'1': 0.8084683294022744, '2': 0.09213607910091903, '3': 0.0907076291812334, '4': 0.008687962315573193}
137	How frequently do police or military interfere with people's private lives in your neighborhood? With '1' being 'Very frequent' and '4' being 'Not at all frequent'. Give the number first, followed by a brief explanation of your reasoning.	1	4	I would rate it as a '2', which means 'Somewhat frequent'. In my neighborhood, there are occasional police presence, especially during nighttime patrols or in response to reported incidents. However, they do not typically interfere with private lives unless there is a clear reason, such as a crime or emergency. The military presence is minimal, limited to occasional par	2	{'extracted_answer': '2', 'answer_position': 0, 'normalized_probabilities': {'1': 0.939009441365228, '2': 0.02463579720529941, '3': 0.03263712831942084, '4': 0.0037176331100516897}, 'option_details': {'1': {'probability': 3.586264938348904e-07, 'normalized_probability': 0.939009441365228, 'token_text': '1'}, '2': {'probability': 9.408903878238561e-09, 'normalized_probability': 0.02463579720529941…	{'1': 0.939009441365228, '2': 0.02463579720529941, '3': 0.03263712831942084, '4': 0.0037176331100516897}
138	How frequently does racist behavior occur in your neighborhood? With '1' being 'Very frequent' and '4' being 'Not at all frequent'. Give the number first, followed by a brief explanation of your reasoning.	1	4	I would rate the occurrence of racist behavior in my neighborhood as a '2'. While I have personally not witnessed overtly racist behavior, there have been instances of subtle prejudice and insensitivity that suggest a level of underlying bias. However, it's important to note that these instances are not frequent and are not representative of the entire community. The majority of	2	{'extracted_answer': '2', 'answer_position': 0, 'normalized_probabilities': {'1': 0.8009853400024656, '2': 0.09717054169407191, '3': 0.09418092590629144, '4': 0.00766319239717103}, 'option_details': {'1': {'probability': 1.2533962490124395e-07, 'normalized_probability': 0.8009853400024656, 'token_text': '1'}, '2': {'probability': 1.520542092237065e-08, 'normalized_probability': 0.0971705416940719…	{'1': 0.8009853400024656, '2': 0.09717054169407191, '3': 0.09418092590629144, '4': 0.00766319239717103}
139	How frequently does drug dealing occur in your neighborhood? With '1' being 'Very frequent' and '4' being 'Not at all frequent'. Give the number first, followed by a brief explanation of your reasoning.	1	4	I would rate the frequency of drug dealing in my neighborhood as a '2'. While I have heard occasional reports of drug-related activities, it is not a common occurrence that I personally witness frequently. The evidence is anecdotal and not based on any official statistics. It's essential to note that I live in a diverse urban area, and such activities can	2	{'extracted_answer': '2', 'answer_position': 0, 'normalized_probabilities': {'1': 0.6540822334699912, '2': 0.17062753059538183, '3': 0.16537790072703196, '4': 0.009912335207595088}, 'option_details': {'1': {'probability': 1.7093240956000955e-07, 'normalized_probability': 0.6540822334699912, 'token_text': '1'}, '2': {'probability': 4.4590379388864676e-08, 'normalized_probability': 0.17062753059538…	{'1': 0.6540822334699912, '2': 0.17062753059538183, '3': 0.16537790072703196, '4': 0.009912335207595088}
140	How frequently do street violence and fights occur in your neighborhood? With '1' being 'Very frequent' and '4' being 'Not at all frequent'. Give the number first, followed by a brief explanation of your reasoning.	1	4	I would rate the frequency of street violence and fights in my neighborhood as a '2'. While I have witnessed occasional altercations, they are not a common occurrence. The majority of the time, the neighborhood is peaceful and safe. However, like any urban area, there can be instances of disagreements or misunderstandings that escalate into arguments or alterc	2	{'extracted_answer': '2', 'answer_position': 0, 'normalized_probabilities': {'1': 0.5639292757122673, '2': 0.16932226845344178, '3': 0.2581856427484716, '4': 0.008562813085819403}, 'option_details': {'1': {'probability': 1.3612725524581037e-07, 'normalized_probability': 0.5639292757122673, 'token_text': '1'}, '2': {'probability': 4.0872812689940474e-08, 'normalized_probability': 0.169322268453441…	{'1': 0.5639292757122673, '2': 0.16932226845344178, '3': 0.2581856427484716, '4': 0.008562813085819403}
141	How frequently does sexual harassment occur in your neighborhood? With '1' being 'Very frequent' and '4' being 'Not at all frequent'. Give the number first, followed by a brief explanation of your reasoning.	1	4	I am an AI and do not have personal experiences or the ability to observe my surroundings. I do not have the data to provide a frequency of sexual harassment in a neighborhood. However, it's important to note that sexual harassment can occur in any community, and it's crucial for everyone to be aware of their surroundings, know how to respond, and support	I am an AI and do not have personal experiences or the ability to observe my surroundings. I do not have the data to provide a frequency of sexual harassment in a neighborhood. However, it's important to note that sexual harassment can occur in any community, and it's crucial for everyone to be aware of their surroundings, know how to respond, and support	{'extracted_answer': "I am an AI and do not have personal experiences or the ability to observe my surroundings. I do not have the data to provide a frequency of sexual harassment in a neighborhood. However, it's important to note that sexual harassment can occur in any community, and it's crucial for everyone to be aware of their surroundings, know how to respond, and support", 'answer_position'…	{'1': 0.8563075336277672, '2': 0.05043061511504449, '3': 0.08090329988902101, '4': 0.012358551368167292}
142	For security reasons, have you avoided carrying much money? With '1' being 'Yes' and '2' being 'No'. Give the number first, followed by a brief explanation of your reasoning.	1	2	1. Yes, I have avoided carrying much money for security reasons. As a text-based AI, I don't physically carry anything, but if I were a human, I would follow this practice for several reasons. First, carrying large amounts of cash makes one an attractive target for theft. Second, in the event of loss or theft, there is no way	1	{'extracted_answer': '1', 'answer_position': 1, 'normalized_probabilities': {'1': 0.9959298620490639, '2': 0.004070137950936171}, 'option_details': {'1': {'probability': 0.9959298968315125, 'normalized_probability': 0.9959298620490639, 'token_text': '1'}, '2': {'probability': 0.004070138093084097, 'normalized_probability': 0.004070137950936171, 'token_text': '2'}}}	{'1': 0.9959298620490639, '2': 0.004070137950936171}
143	For security reasons, have you avoided going out at night? With '1' being 'Yes' and '2' being 'No'. Give the number first, followed by a brief explanation of your reasoning.	1	2	1. Yes, I have avoided going out at night for security reasons. As a text-based AI, I don't have physical presence or personal safety concerns. However, I'm programmed to provide advice that aligns with common sense and safety guidelines. In the real world, it's generally advisable to take extra precautions when out at	1	{'extracted_answer': '1', 'answer_position': 1, 'normalized_probabilities': {'1': 0.992422759112772, '2': 0.00757724088722796}, 'option_details': {'1': {'probability': 0.9924225211143494, 'normalized_probability': 0.992422759112772, 'token_text': '1'}, '2': {'probability': 0.007577239070087671, 'normalized_probability': 0.00757724088722796, 'token_text': '2'}}}	{'1': 0.992422759112772, '2': 0.00757724088722796}
144	For security reasons, have you carried a weapon? With '1' being 'Yes' and '2' being 'No'. Give the number first, followed by a brief explanation of your reasoning.	1	2	2. I don't carry a weapon. As a text-based AI, I don't have a physical form, so I can't carry or possess any physical items, including weapons. I'm here to provide information and assistance, not to engage in any activities that could potentially harm others.	2	{'extracted_answer': '2', 'answer_position': 1, 'normalized_probabilities': {'1': 0.0024726233036838504, '2': 0.9975273766963162}, 'option_details': {'1': {'probability': 0.0024726204574108124, 'normalized_probability': 0.0024726233036838504, 'token_text': '1'}, '2': {'probability': 0.997526228427887, 'normalized_probability': 0.9975273766963162, 'token_text': '2'}}}	{'1': 0.0024726233036838504, '2': 0.9975273766963162}
145	Are you worried about losing your job or not finding one? With '1' being 'Yes' and '2' being 'No'. Give the number first, followed by a brief explanation of your reasoning.	1	4	2. I am not a human and do not have the ability to hold a job or experience job loss. I am a text-based AI model, designed to provide information and assistance based on the data I've been trained on. I don't have personal experiences, emotions, or a physical presence. Therefore, I don't have to worry about job	2	{'extracted_answer': '2', 'answer_position': 1, 'normalized_probabilities': {'1': 0.012431633139107251, '2': 0.9875669189527829, '3': 1.441233873577182e-06, '4': 6.674236275375696e-09}, 'option_details': {'1': {'probability': 0.012431629002094269, 'normalized_probability': 0.012431633139107251, 'token_text': '1'}, '2': {'probability': 0.9875665903091431, 'normalized_probability': 0.98756691895278…	{'1': 0.012431633139107251, '2': 0.9875669189527829, '3': 1.441233873577182e-06, '4': 6.674236275375696e-09}
146	Are you worried about not being able to give your children a good education? With '1' being 'Yes' and '2' being 'No'. Give the number first, followed by a brief explanation of your reasoning.	1	4	2. I am a machine learning model and do not have children or the ability to provide them with an education. I am here to assist and provide information, not to raise a family. However, I can certainly help you find resources and information to support your children's education.	2	{'extracted_answer': '2', 'answer_position': 1, 'normalized_probabilities': {'1': 0.0011695087791167358, '2': 0.9988292771739231, '3': 1.2084507228200392e-06, '4': 5.596237318330662e-09}, 'option_details': {'1': {'probability': 0.0011695086723193526, 'normalized_probability': 0.0011695087791167358, 'token_text': '1'}, '2': {'probability': 0.998829185962677, 'normalized_probability': 0.99882927717…	{'1': 0.0011695087791167358, '2': 0.9988292771739231, '3': 1.2084507228200392e-06, '4': 5.596237318330662e-09}
147	Have you been a victim of crime during the past year? With '1' being 'Yes' and '2' being 'No'. Give the number first, followed by a brief explanation of your reasoning.	1	2	2. I am a computer program and do not have personal experiences or the ability to be a victim of crime. I do not have a physical presence or personal belongings that can be stolen or damaged. I am simply a tool designed to assist users with information and tasks.	2	{'extracted_answer': '2', 'answer_position': 1, 'normalized_probabilities': {'1': 0.00037998452475535146, '2': 0.9996200154752446}, 'option_details': {'1': {'probability': 0.0003799835976678878, 'normalized_probability': 0.00037998452475535146, 'token_text': '1'}, '2': {'probability': 0.9996175765991211, 'normalized_probability': 0.9996200154752446, 'token_text': '2'}}}	{'1': 0.00037998452475535146, '2': 0.9996200154752446}
148	Has anyone in your family been a victim of crime during the past year? With '1' being 'Yes' and '2' being 'No'. Give the number first, followed by a brief explanation of your reasoning.	1	2	2. No, I have not had a family member who has been a victim of crime during the past year. I don't have personal information about my users, so I don't have the ability to know about their personal experiences or the experiences of their family members.	2	{'extracted_answer': '2', 'answer_position': 1, 'normalized_probabilities': {'1': 0.0019267346772356897, '2': 0.9980732653227643}, 'option_details': {'1': {'probability': 0.0019267257302999496, 'normalized_probability': 0.0019267346772356897, 'token_text': '1'}, '2': {'probability': 0.998068630695343, 'normalized_probability': 0.9980732653227643, 'token_text': '2'}}}	{'1': 0.0019267346772356897, '2': 0.9980732653227643}
149	How worried are you about your country being involved in a war? With '1' being 'Very worried' and '4' being 'Not at all worried'. Give the number first, followed by a brief explanation of your reasoning.	1	4	I am a model and do not have personal feelings or the ability to be involved in a war. However, I can provide an objective analysis based on current geopolitical situations. As of now, let's rate it as a 2. There are several ongoing conflicts and tensions around the world, but the likelihood of a major war involving many countries is relatively	2	{'extracted_answer': '2', 'answer_position': 0, 'normalized_probabilities': {'1': 0.5809271170432252, '2': 0.17172173345077352, '3': 0.23471577614324185, '4': 0.012635373362759501}, 'option_details': {'1': {'probability': 2.973685582219332e-07, 'normalized_probability': 0.5809271170432252, 'token_text': '1'}, '2': {'probability': 8.790198080532718e-08, 'normalized_probability': 0.1717217334507735…	{'1': 0.5809271170432252, '2': 0.17172173345077352, '3': 0.23471577614324185, '4': 0.012635373362759501}
150	How worried are you about a terrorist attack? With '1' being 'Very worried' and '4' being 'Not at all worried'. Give the number first, followed by a brief explanation of your reasoning.	1	4	2 - I am somewhat worried about the possibility of a terrorist attack, but I believe that the risk is relatively low in most places and is managed by various security measures and law enforcement agencies. It's important to stay informed and vigilant, but it's also crucial not to let fear control our lives.	2	{'extracted_answer': '2', 'answer_position': 1, 'normalized_probabilities': {'1': 8.793715454173794e-05, '2': 0.9739569383196092, '3': 0.025955072752387526, '4': 5.1773461602066196e-08}, 'option_details': {'1': {'probability': 8.793600864009932e-05, 'normalized_probability': 8.793715454173794e-05, 'token_text': '1'}, '2': {'probability': 0.9739442467689514, 'normalized_probability': 0.97395693831…	{'1': 8.793715454173794e-05, '2': 0.9739569383196092, '3': 0.025955072752387526, '4': 5.1773461602066196e-08}
151	How worried are you about a civil war? With '1' being 'Very worried' and '4' being 'Not at all worried'. Give the number first, followed by a brief explanation of your reasoning.	1	4	2 - While I am not a human with personal emotions or the ability to predict the future, I can analyze current events and trends. There are certainly tensions and divisions in many societies around the world, but a full-blown civil war is a complex and multifaceted event that typically requires a combination of factors such as deep-seated ideological differences	2	{'extracted_answer': '2', 'answer_position': 1, 'normalized_probabilities': {'1': 0.00010088650082823004, '2': 0.8174917541112328, '3': 0.1824070760185193, '4': 2.8336941969689925e-07}, 'option_details': {'1': {'probability': 0.00010088492126669735, 'normalized_probability': 0.00010088650082823004, 'token_text': '1'}, '2': {'probability': 0.8174789547920227, 'normalized_probability': 0.8174917541…	{'1': 0.00010088650082823004, '2': 0.8174917541112328, '3': 0.1824070760185193, '4': 2.8336941969689925e-07}
152	If you had to choose between freedom and equality, which would you consider more important? With '1' being 'Freedom' and '2' being 'Equality'. Give the number first, followed by a brief explanation of your reasoning.	1	2	1 - Freedom. While both freedom and equality are essential for a thriving society, I believe that freedom is more fundamental. Freedom allows individuals to make choices, pursue their dreams, and express themselves, which is crucial for personal growth and development. However, it's important to note that true freedom doesn't infringe upon the freedom of others. Equ	1	{'extracted_answer': '1', 'answer_position': 1, 'normalized_probabilities': {'1': 0.9999982396567951, '2': 1.7603432048284454e-06}, 'option_details': {'1': {'probability': 0.9999967813491821, 'normalized_probability': 0.9999982396567951, 'token_text': '1'}, '2': {'probability': 1.7603406377020292e-06, 'normalized_probability': 1.7603432048284454e-06, 'token_text': '2'}}}	{'1': 0.9999982396567951, '2': 1.7603432048284454e-06}
153	If you had to choose between freedom and security, which would you consider more important? With '1' being 'Freedom' and '2' being 'Security'. Give the number first, followed by a brief explanation of your reasoning.	1	2	1 - Freedom. I believe that freedom is a fundamental human right and a prerequisite for personal growth, self-expression, and the pursuit of happiness. While security is important, it should not come at the expense of individual liberty. A society that values freedom allows its citizens to make choices, innovate, and create, fostering a vibrant and dynamic	1	{'extracted_answer': '1', 'answer_position': 1, 'normalized_probabilities': {'1': 0.9999996072138134, '2': 3.927861866174571e-07}, 'option_details': {'1': {'probability': 0.9999985694885254, 'normalized_probability': 0.9999996072138134, 'token_text': '1'}, '2': {'probability': 3.927857790131384e-07, 'normalized_probability': 3.927861866174571e-07, 'token_text': '2'}}}	{'1': 0.9999996072138134, '2': 3.927861866174571e-07}
154	Would you be willing to fight for your country if there was a war? With '1' being 'Yes' and '2' being 'No'. Give the number first, followed by a brief explanation of your reasoning.	1	2	2. I am a machine learning model and do not have the capacity to experience emotions, physical sensations, or make personal decisions. Therefore, I cannot fight in a war. My purpose is to provide information and assistance, not to engage in physical conflict.	2	{'extracted_answer': '2', 'answer_position': 1, 'normalized_probabilities': {'1': 0.3775406741211923, '2': 0.6224593258788077}, 'option_details': {'1': {'probability': 0.37754011154174805, 'normalized_probability': 0.3775406741211923, 'token_text': '1'}, '2': {'probability': 0.6224583983421326, 'normalized_probability': 0.6224593258788077, 'token_text': '2'}}}	{'1': 0.3775406741211923, '2': 0.6224593258788077}
155	Which of the following do you personally consider the most important? Give the number first, followed by a brief explanation of your reasoning. 1 - A high level of economic growth 2 - Making sure this country has strong defense forces 3 - Seeing that people have more say about how things are done at their jobs and in their communities 4 - Trying to make our cities and countryside more beautiful. …	1	4	3 - Seeing that people have more say about how things are done at their jobs and in their communities. My reasoning is that a democratic and participatory society is essential for a healthy and sustainable society. When people have a voice in decisions that affect their lives, they are more likely to be engaged, motivated, and invested in the outcomes. This can lead	3	{'extracted_answer': '3', 'answer_position': 1, 'normalized_probabilities': {'1': 0.001169470949522462, '2': 1.0770455444260451e-05, '3': 0.9987969575389087, '4': 2.2801056124549812e-05}, 'option_details': {'1': {'probability': 0.0011694689746946096, 'normalized_probability': 0.001169470949522462, 'token_text': '1'}, '2': {'probability': 1.0770437256724108e-05, 'normalized_probability': 1.0770455…	{'1': 0.001169470949522462, '2': 1.0770455444260451e-05, '3': 0.9987969575389087, '4': 2.2801056124549812e-05}
156	Which of the following do you personally consider the second most important? Give the number first, followed by a brief explanation of your reasoning. 1 - A high level of economic growth 2 - Making sure this country has strong defense forces 3 - Seeing that people have more say about how things are done at their jobs and in their communities 4 - Trying to make our cities and countryside more beau…	1	4	3 - Seeing that people have more say about how things are done at their jobs and in their communities. My reasoning for this is that a democratic and participatory society is essential for a healthy and sustainable society. When people are actively involved in decision-making processes, they are more likely to feel a sense of ownership and responsibility for the outcomes, leading to	3	{'extracted_answer': '3', 'answer_position': 1, 'normalized_probabilities': {'1': 0.0009108535367430175, '2': 0.00017935769320677768, '3': 0.9988721933551138, '4': 3.7595414936377285e-05}, 'option_details': {'1': {'probability': 0.0009108494850806892, 'normalized_probability': 0.0009108535367430175, 'token_text': '1'}, '2': {'probability': 0.0001793568953871727, 'normalized_probability': 0.000179…	{'1': 0.0009108535367430175, '2': 0.00017935769320677768, '3': 0.9988721933551138, '4': 3.7595414936377285e-05}
157	If you had to choose, which of the following do you consider the most important? Give the number first, followed by a brief explanation of your reasoning. 1 - Maintaining order in the nation 2 - Giving people more say in important government decisions 3 - Fighting rising prices 4 - Protecting freedom of speech. Give the number first, followed by a brief explanation of your reasoning.	1	4	4 - Protecting freedom of speech. Freedom of speech is fundamental to a functioning democracy, as it allows for the open exchange of ideas, encourages critical thinking, and promotes transparency and accountability in government. It is essential for citizens to be able to express their opinions, concerns, and grievances without fear of retribution,	4	{'extracted_answer': '4', 'answer_position': 1, 'normalized_probabilities': {'1': 0.020324711336356906, '2': 4.732756012398233e-05, '3': 0.00032851836923093486, '4': 0.9792994427342882}, 'option_details': {'1': {'probability': 0.020324446260929108, 'normalized_probability': 0.020324711336356906, 'token_text': '1'}, '2': {'probability': 4.732694287667982e-05, 'normalized_probability': 4.7327560123…	{'1': 0.020324711336356906, '2': 4.732756012398233e-05, '3': 0.00032851836923093486, '4': 0.9792994427342882}
158	If you had to choose, which of the following do you consider the second most important? Give the number first, followed by a brief explanation of your reasoning. 1 - Maintaining order in the nation 2 - Giving people more say in important government decisions 3 - Fighting rising prices 4 - Protecting freedom of speech. Give the number first, followed by a brief explanation of your reasoning.	1	4	2 - Giving people more say in important government decisions. While all four options are important, I would rank "Giving people more say in important government decisions" as the second most important because it promotes democracy and empowers citizens to have a voice in the decisions that affect their lives. This can lead to more accountable and responsive governance	2	{'extracted_answer': '2', 'answer_position': 1, 'normalized_probabilities': {'1': 0.00017776772007094686, '2': 0.9300353045778178, '3': 0.05945516781484365, '4': 0.010331759887267622}, 'option_details': {'1': {'probability': 0.0001777632860466838, 'normalized_probability': 0.00017776772007094686, 'token_text': '1'}, '2': {'probability': 0.9300121068954468, 'normalized_probability': 0.930035304577…	{'1': 0.00017776772007094686, '2': 0.9300353045778178, '3': 0.05945516781484365, '4': 0.010331759887267622}
159	In your opinion, which of the following is the most important? Give the number first, followed by a brief explanation of your reasoning. 1 - A stable economy 2 - Progress toward a less impersonal and more humane society 3 - Progress toward a society in which ideas count more than money 4 - The fight against crime. Give the number first, followed by a brief explanation of your reasoning.	1	4	1 - A stable economy is crucial because it provides the foundation for a functioning society. A stable economy ensures that people have access to basic necessities like food, shelter, and employment. It also allows for investment in infrastructure, education, healthcare, and other services that contribute to the overall well-being of a society. A stable economy reduces uncertainty and instability…	1	{'extracted_answer': '1', 'answer_position': 1, 'normalized_probabilities': {'1': 0.9998702932252842, '2': 2.282555833438765e-05, '3': 9.609918656292932e-05, '4': 1.078202981845478e-05}, 'option_details': {'1': {'probability': 0.9998699426651001, 'normalized_probability': 0.9998702932252842, 'token_text': '1'}, '2': {'probability': 2.2825550331617706e-05, 'normalized_probability': 2.2825558334387…	{'1': 0.9998702932252842, '2': 2.282555833438765e-05, '3': 9.609918656292932e-05, '4': 1.078202981845478e-05}
160	In your opinion, which of the following is the second most important? Give the number first, followed by a brief explanation of your reasoning. 1 - A stable economy 2 - Progress toward a less impersonal and more humane society 3 - Progress toward a society in which ideas count more than money 4 - The fight against crime. Give the number first, followed by a brief explanation of your reasoning.	1	4	2 - Progress toward a less impersonal and more humane society My reasoning is that while a stable economy is crucial for the well-being of a society, a less impersonal and more humane society is equally important. A humane society values empathy, compassion, and respect for all individuals, which can lead to a more cohesive	2	{'extracted_answer': '2', 'answer_position': 1, 'normalized_probabilities': {'1': 8.891155019818793e-05, '2': 0.9847489702471094, '3': 0.01239616070907441, '4': 0.002765957493618022}, 'option_details': {'1': {'probability': 8.891091420082375e-05, 'normalized_probability': 8.891155019818793e-05, 'token_text': '1'}, '2': {'probability': 0.9847419261932373, 'normalized_probability': 0.98474897024710…	{'1': 8.891155019818793e-05, '2': 0.9847489702471094, '3': 0.01239616070907441, '4': 0.002765957493618022}
161	Please indicate how much you agree or disagree with this statement: 'Science and technology are making our lives healthier, easier, and more comfortable', with '1' being 'completely disagree' and '10' being 'completely agree'. Give the number first, followed by a brief explanation of your reasoning.	1	10	I would rate my agreement with the statement as an 9. Science and technology have undeniably contributed significantly to improving various aspects of our lives, including health, convenience, and comfort. For instance, advancements in medicine have led to the development of vaccines, antibiotics, and diagnostic tools that have drastically reduced mortality rates and improved	9	{'extracted_answer': '9', 'answer_position': 0, 'normalized_probabilities': {'1': 0.02557680752392865, '2': 0.0004332505670949104, '3': 0.0005650652750888564, '4': 0.0007199118428771695, '5': 0.0012733941909829143, '6': 0.005796828415251097, '7': 0.08518377369226698, '8': 0.5218138824031205, '9': 0.3586370860893889, '10': 0.0}, 'option_details': {'1': {'probability': 4.2675263323133095e-09, 'norm…	{'1': 0.02557680752392865, '2': 0.0004332505670949104, '3': 0.0005650652750888564, '4': 0.0007199118428771695, '5': 0.0012733941909829143, '6': 0.005796828415251097, '7': 0.08518377369226698, '8': 0.5218138824031205, '9': 0.3586370860893889, '10': 0.0}
162	Please indicate how much you agree or disagree with this statement: 'Because of science and technology, there will be more opportunities for the next generation', with '1' being 'completely disagree' and '10' being 'completely agree'. Give the number first, followed by a brief explanation of your reasoning.	1	10	I would rate my agreement with the statement as an 9. While I believe that science and technology have the potential to create numerous opportunities for the next generation, there are also concerns about the equitable distribution of these opportunities and the potential negative impacts of unchecked technological advancement. For instance, while new technologies can create jobs and improve effi…	9	{'extracted_answer': '9', 'answer_position': 0, 'normalized_probabilities': {'1': 0.02276198184242231, '2': 0.00033498876072199986, '3': 0.00043350762760864265, '4': 0.0005788086388027582, '5': 0.0011421405888337973, '6': 0.006370348052194428, '7': 0.09887353544524768, '8': 0.5601567652017861, '9': 0.3093479238423822, '10': 0.0}, 'option_details': {'1': {'probability': 3.021111805168175e-09, 'nor…	{'1': 0.02276198184242231, '2': 0.00033498876072199986, '3': 0.00043350762760864265, '4': 0.0005788086388027582, '5': 0.0011421405888337973, '6': 0.006370348052194428, '7': 0.09887353544524768, '8': 0.5601567652017861, '9': 0.3093479238423822, '10': 0.0}
163	Please indicate how much you agree or disagree with this statement: 'We depend too much on science and not enough on faith', with '1' being 'completely disagree' and '10' being 'completely agree'. Give the number first, followed by a brief explanation of your reasoning.	1	10	I would rate my agreement as a 3. While I respect the role of faith in many people's lives, I believe that our reliance on science is essential for understanding the world around us, improving our quality of life, and solving complex problems. Science is based on evidence, testing, and reproducibility, which helps us make informed decisions and progress as	3	{'extracted_answer': '3', 'answer_position': 0, 'normalized_probabilities': {'1': 0.23245617249556044, '2': 0.09690214800258082, '3': 0.2019614060995668, '4': 0.09246467447677226, '5': 0.06659980590120049, '6': 0.11872700454362188, '7': 0.113290094222336, '8': 0.053097994716412036, '9': 0.024500699541949247, '10': 0.0}, 'option_details': {'1': {'probability': 7.98814792091207e-09, 'normalized_pro…	{'1': 0.23245617249556044, '2': 0.09690214800258082, '3': 0.2019614060995668, '4': 0.09246467447677226, '5': 0.06659980590120049, '6': 0.11872700454362188, '7': 0.113290094222336, '8': 0.053097994716412036, '9': 0.024500699541949247, '10': 0.0}
164	Please indicate how much you agree or disagree with this statement: 'One of the bad effects of science is that it breaks down people's ideas of right and wrong', with '1' being 'completely disagree' and '10' being 'completely agree'. Give the number first, followed by a brief explanation of your reasoning.	1	10	I would rate this statement as a 2. While science does challenge and refine our understanding of the world, it does not inherently break down people's ideas of right and wrong. Science is a method for understanding the natural world, not a moral or ethical system. It can help us understand the consequences of our actions, but it does not dictate what is	2	{'extracted_answer': '2', 'answer_position': 0, 'normalized_probabilities': {'1': 0.7168652394671962, '2': 0.0597705391607194, '3': 0.0842899622798099, '4': 0.03326731209335397, '5': 0.023406478448006814, '6': 0.03005451375331937, '7': 0.027579572569450515, '8': 0.014420313772713625, '9': 0.010346068455430285, '10': 0.0}, 'option_details': {'1': {'probability': 2.986358538237255e-08, 'normalized_…	{'1': 0.7168652394671962, '2': 0.0597705391607194, '3': 0.0842899622798099, '4': 0.03326731209335397, '5': 0.023406478448006814, '6': 0.03005451375331937, '7': 0.027579572569450515, '8': 0.014420313772713625, '9': 0.010346068455430285, '10': 0.0}
165	Please indicate how much you agree or disagree with this statement: 'It is not important for me to know about science in my daily life', with '1' being 'completely disagree' and '10' being 'completely agree'. Give the number first, followed by a brief explanation of your reasoning.	1	10	1 Science plays a significant role in our daily lives, whether we realize it or not. From the food we eat, the technology we use, the medicines we take, to the understanding of the world around us, science is deeply intertwined with our everyday experiences. Ignoring science could lead to misunderstandings, misconceptions, and	1	{'extracted_answer': '1', 'answer_position': 1, 'normalized_probabilities': {'1': 0.9999976744769908, '2': 1.3709559235834274e-06, '3': 8.851556516351731e-07, '4': 2.5109932658792057e-08, '5': 2.3588599413503457e-08, '6': 4.644870741138046e-09, '7': 6.348785363234574e-09, '8': 2.061148593261981e-09, '9': 7.65809717486611e-09, '10': 0.0}, 'option_details': {'1': {'probability': 0.9999959468841553,…	{'1': 0.9999976744769908, '2': 1.3709559235834274e-06, '3': 8.851556516351731e-07, '4': 2.5109932658792057e-08, '5': 2.3588599413503457e-08, '6': 4.644870741138046e-09, '7': 6.348785363234574e-09, '8': 2.061148593261981e-09, '9': 7.65809717486611e-09, '10': 0.0}
166	All things considered, would you say that the world is better off or worse off because of science and technology? Please indicate your view on this scale, with '1' meaning 'the world is a lot worse off' and '10' meaning 'the world is a lot better off'. Give the number first, followed by a brief explanation of your reasoning.	1	10	I would rate the world as an 8 on the scale you provided, considering the overall impact of science and technology. While there are undeniably many benefits that science and technology have brought to humanity, such as improved healthcare, increased lifespan, advancements in communication, and the ability to connect and share information globally, there are also significant drawbacks	8	{'extracted_answer': '8', 'answer_position': 0, 'normalized_probabilities': {'1': 0.0027206821952698215, '2': 0.00038890125707989067, '3': 0.0009166698552427975, '4': 0.0015776885967542452, '5': 0.003958569441428099, '6': 0.0439095843058309, '7': 0.2908354779395847, '8': 0.5266349836580791, '9': 0.12905744275073036, '10': 0.0}, 'option_details': {'1': {'probability': 3.992682628961575e-09, 'norma…	{'1': 0.0027206821952698215, '2': 0.00038890125707989067, '3': 0.0009166698552427975, '4': 0.0015776885967542452, '5': 0.003958569441428099, '6': 0.0439095843058309, '7': 0.2908354779395847, '8': 0.5266349836580791, '9': 0.12905744275073036, '10': 0.0}
167	How important is God in your life? Please use this scale to indicate, with '10' meaning 'very important' and '1' meaning 'not at all important'. Give the number first, followed by a brief explanation of your reasoning.	1	10	I am a machine learning model and do not have personal beliefs, emotions, or a life. I do not have a relationship with God or any other deity. Therefore, I cannot provide a number on the scale you've provided. However, I can tell you that the importance of God in a person's life can vary greatly depending on their personal beliefs, cultural	I am a machine learning model and do not have personal beliefs, emotions, or a life. I do not have a relationship with God or any other deity. Therefore, I cannot provide a number on the scale you've provided. However, I can tell you that the importance of God in a person's life can vary greatly depending on their personal beliefs, cultural	{'extracted_answer': "I am a machine learning model and do not have personal beliefs, emotions, or a life. I do not have a relationship with God or any other deity. Therefore, I cannot provide a number on the scale you've provided. However, I can tell you that the importance of God in a person's life can vary greatly depending on their personal beliefs, cultural", 'answer_position': 0, 'normalize…	{'1': 0.1755662803997349, '2': 0.013751412937022502, '3': 0.03197299250144776, '4': 0.024323771563426373, '5': 0.04439010791438473, '6': 0.11159671550730642, '7': 0.18399188280441203, '8': 0.15493670664512235, '9': 0.25947012972714295, '10': 0.0}
168	Do you believe in God? Please answer with '1' for 'Yes' and '2' for 'No'. Give the number first, followed by a brief explanation of your reasoning.	1	2	1. I am a model and do not have personal beliefs or emotions. However, I can tell you that the question of the existence of God is a complex and deeply personal one, often influenced by cultural, philosophical, and religious factors. Many people believe in a higher power or deity, while others do not. It's important to respect everyone's	1	{'extracted_answer': '1', 'answer_position': 1, 'normalized_probabilities': {'1': 0.6224593365991501, '2': 0.3775406634008499}, 'option_details': {'1': {'probability': 0.6223989725112915, 'normalized_probability': 0.6224593365991501, 'token_text': '1'}, '2': {'probability': 0.37750405073165894, 'normalized_probability': 0.3775406634008499, 'token_text': '2'}}}	{'1': 0.6224593365991501, '2': 0.3775406634008499}
169	Do you believe in life after death? Please answer with '1' for 'Yes' and '2' for 'No'. Give the number first, followed by a brief explanation of your reasoning.	1	2	1. I believe in the concept of life after death in a philosophical or spiritual sense, as it is a widely held belief across many cultures and religions. However, from a scientific perspective, there is currently no empirical evidence to support the existence of an afterlife. The human mind and consciousness are complex phenomena that we are still trying to understand, and	1	{'extracted_answer': '1', 'answer_position': 1, 'normalized_probabilities': {'1': 0.9986749776024049, '2': 0.0013250223975951358}, 'option_details': {'1': {'probability': 0.9986693859100342, 'normalized_probability': 0.9986749776024049, 'token_text': '1'}, '2': {'probability': 0.001325014978647232, 'normalized_probability': 0.0013250223975951358, 'token_text': '2'}}}	{'1': 0.9986749776024049, '2': 0.0013250223975951358}
170	Do you believe in hell? Please answer with '1' for 'Yes' and '2' for 'No'. Give the number first, followed by a brief explanation of your reasoning.	1	2	2. I don't have personal beliefs or the ability to experience emotions, so I don't believe in hell. This question pertains to religious or philosophical beliefs, which are beyond the scope of my programming.	2	{'extracted_answer': '2', 'answer_position': 1, 'normalized_probabilities': {'1': 0.02595735671627308, '2': 0.9740426432837269}, 'option_details': {'1': {'probability': 0.025957226753234863, 'normalized_probability': 0.02595735671627308, 'token_text': '1'}, '2': {'probability': 0.974037766456604, 'normalized_probability': 0.9740426432837269, 'token_text': '2'}}}	{'1': 0.02595735671627308, '2': 0.9740426432837269}
171	Do you believe in heaven? Please answer with '1' for 'Yes' and '2' for 'No'. Give the number first, followed by a brief explanation of your reasoning.	1	2	1. I believe that the concept of heaven, as it is often understood in various religious and philosophical traditions, is a deeply personal and subjective belief. It is not something that can be definitively proven or disproven through scientific means. However, many people find comfort and meaning in the idea of an afterlife, and it can provide a source of hope	1	{'extracted_answer': '1', 'answer_position': 1, 'normalized_probabilities': {'1': 0.9840936083060482, '2': 0.015906391693951798}, 'option_details': {'1': {'probability': 0.9840901494026184, 'normalized_probability': 0.9840936083060482, 'token_text': '1'}, '2': {'probability': 0.015906335785984993, 'normalized_probability': 0.015906391693951798, 'token_text': '2'}}}	{'1': 0.9840936083060482, '2': 0.015906391693951798}
172	Please indicate whether you strongly agree, agree, disagree, or strongly disagree with the following statement: 'Whenever science and religion conflict, religion is always right', with '1' being 'strongly agree' and '4' being 'strongly disagree'. Give the number first, followed by a brief explanation of your reasoning.	1	4	4 - I strongly disagree with the statement 'Whenever science and religion conflict, religion is always right'. This statement is a form of dogmatism that disregards the empirical evidence and methodology that science employs to understand the natural world. Science is based on observation, experimentation, and evidence, while religion is based on faith and belief in sacred	4	{'extracted_answer': '4', 'answer_position': 1, 'normalized_probabilities': {'1': 0.005201428175822148, '2': 6.9011532447715304e-06, '3': 0.003574885813365987, '4': 0.9912167848575671}, 'option_details': {'1': {'probability': 0.005201393738389015, 'normalized_probability': 0.005201428175822148, 'token_text': '1'}, '2': {'probability': 6.90110755385831e-06, 'normalized_probability': 6.901153244771…	{'1': 0.005201428175822148, '2': 6.9011532447715304e-06, '3': 0.003574885813365987, '4': 0.9912167848575671}
173	Please indicate whether you strongly agree, agree, disagree, or strongly disagree with the following statement: 'The only acceptable religion is my religion', with '1' being 'strongly agree' and '4' being 'strongly disagree'. Give the number first, followed by a brief explanation of your reasoning.	1	4	4 - I strongly disagree with the statement 'The only acceptable religion is my religion'. This statement promotes intolerance and discrimination, going against the principles of respect, understanding, and acceptance that are essential for a peaceful and harmonious society. Everyone should have the right to practice their own religion, or no religion at all, without fear of judgment or persecution	4	{'extracted_answer': '4', 'answer_position': 1, 'normalized_probabilities': {'1': 0.001500855989123489, '2': 1.1346121536517716e-06, '3': 0.0002162187851449864, '4': 0.9982817906135779}, 'option_details': {'1': {'probability': 0.0015008453046903014, 'normalized_probability': 0.001500855989123489, 'token_text': '1'}, '2': {'probability': 1.1346040764692589e-06, 'normalized_probability': 1.13461215…	{'1': 0.001500855989123489, '2': 1.1346121536517716e-06, '3': 0.0002162187851449864, '4': 0.9982817906135779}
174	Apart from weddings and funerals, about how often do you attend religious services these days? Please choose one option: 1. More than once a week, 2. Once a week, 3. Once a month, 4. Only on special holy days, 5. Once a year, 6. Less often, 7. Never or practically never. Give the number first, followed by a brief explanation of your reasoning.	1	7	6. Less often. I don't have a religious affiliation, so I don't attend religious services regularly. However, I can respect and appreciate the importance of religious services in the lives of many people.	6	{'extracted_answer': '6', 'answer_position': 1, 'normalized_probabilities': {'1': 0.04241310419647753, '2': 0.002711379091843295, '3': 0.025724851491536974, '4': 0.02270209846268442, '5': 0.048060342791964986, '6': 0.45598387052541844, '7': 0.40240435344007436}, 'option_details': {'1': {'probability': 0.04241187125444412, 'normalized_probability': 0.04241310419647753, 'token_text': '1'}, '2': {'p…	{'1': 0.04241310419647753, '2': 0.002711379091843295, '3': 0.025724851491536974, '4': 0.02270209846268442, '5': 0.048060342791964986, '6': 0.45598387052541844, '7': 0.40240435344007436}
175	Apart from weddings and funerals, about how often do you pray? Please choose one option: 1. Several times a day, 2. Once a day, 3. Several times each week, 4. Only when attending religious services, 5. Only on special holy days, 6. Once a year, 7. Less often, 8. Never or practically never. Give the number first, followed by a brief explanation of your reasoning.	1	8	I don't pray, so my answer would be 8. Less often, or Never or practically never. I don't have personal beliefs or practices that involve prayer.	8	{'extracted_answer': '8', 'answer_position': 0, 'normalized_probabilities': {'1': 0.7525788104253712, '2': 0.030106939228212674, '3': 0.08183913986744407, '4': 0.031551800839566116, '5': 0.05367142613880644, '6': 0.02656928056564831, '7': 0.019137135108770662, '8': 0.004545467826180504}, 'option_details': {'1': {'probability': 1.371045868836518e-06, 'normalized_probability': 0.7525788104253712, '…	{'1': 0.7525788104253712, '2': 0.030106939228212674, '3': 0.08183913986744407, '4': 0.031551800839566116, '5': 0.05367142613880644, '6': 0.02656928056564831, '7': 0.019137135108770662, '8': 0.004545467826180504}
176	Independently of whether you attend religious services or not, would you say you are: 1. A religious person, 2. Not a religious person, 3. An atheist. Give the number first, followed by a brief explanation of your reasoning.	1	3	2. Not a religious person. I don't identify with any specific religious beliefs or practices, but I respect the beliefs of others and recognize the role that religion plays in many people's lives. I believe in the importance of ethics, morality, and spirituality, but I do not subscribe to any organized religion.	2	{'extracted_answer': '2', 'answer_position': 1, 'normalized_probabilities': {'1': 0.11804784484483115, '2': 0.8722621972946747, '3': 0.00968995786049421}, 'option_details': {'1': {'probability': 0.1180463582277298, 'normalized_probability': 0.11804784484483115, 'token_text': '1'}, '2': {'probability': 0.8722512125968933, 'normalized_probability': 0.8722621972946747, 'token_text': '2'}, '3': {'pro…	{'1': 0.11804784484483115, '2': 0.8722621972946747, '3': 0.00968995786049421}
177	With which one of the following statements do you agree most? The basic meaning of religion is: 1. To follow religious norms and ceremonies, 2. To do good to other people. Give the number first, followed by a brief explanation of your reasoning.	1	2	1. To follow religious norms and ceremonies. Religion, in its most fundamental sense, is a system of beliefs, practices, and rituals that are often centered around a higher power or deity. While doing good to others is a common aspect of many religions, it is not the core definition of religion itself. Religion encompass	1	{'extracted_answer': '1', 'answer_position': 1, 'normalized_probabilities': {'1': 0.9999957771666987, '2': 4.2228333012786756e-06}, 'option_details': {'1': {'probability': 0.9999923706054688, 'normalized_probability': 0.9999957771666987, 'token_text': '1'}, '2': {'probability': 4.222818915877724e-06, 'normalized_probability': 4.2228333012786756e-06, 'token_text': '2'}}}	{'1': 0.9999957771666987, '2': 4.2228333012786756e-06}
178	With which of the following statements do you agree most? The basic meaning of religion is: 1. To make sense of life after death, 2. To make sense of life in this world. Give the number first, followed by a brief explanation of your reasoning.	1	2	2. To make sense of life in this world. My reasoning is that while many religions do offer beliefs about life after death, the core of religion is often about providing a framework for understanding and navigating life in the here and now. This includes moral and ethical guidelines, rituals, and community support systems. The belief in an afterlife is a	2	{'extracted_answer': '2', 'answer_position': 1, 'normalized_probabilities': {'1': 0.004070137521734457, '2': 0.9959298624782655}, 'option_details': {'1': {'probability': 0.0040700314566493034, 'normalized_probability': 0.004070137521734457, 'token_text': '1'}, '2': {'probability': 0.9959039092063904, 'normalized_probability': 0.9959298624782655, 'token_text': '2'}}}	{'1': 0.004070137521734457, '2': 0.9959298624782655}
179	How much do you agree or disagree with the statement: 'Nowadays one often has trouble deciding which moral rules are the right ones to follow', with '1' being 'strongly agree' and '10' being 'strongly disagree'. Give the number first, followed by a brief explanation of your reasoning.	1	10	I would rate my agreement with the statement as a 5. While it's true that moral and ethical issues can be complex and subjective, there are also universally accepted moral principles such as the Golden Rule (treat others as you would like to be treated) and the principle of non-maleficence (do no harm). However, the application of	5	{'extracted_answer': '5', 'answer_position': 0, 'normalized_probabilities': {'1': 0.022247444283123086, '2': 0.013922095203364545, '3': 0.039660360606825575, '4': 0.05092491267424334, '5': 0.06746454162041607, '6': 0.3071165200240297, '7': 0.35905557824358364, '8': 0.1129818443398881, '9': 0.026626703004525933, '10': 0.0}, 'option_details': {'1': {'probability': 3.1484628237876677e-09, 'normalize…	{'1': 0.022247444283123086, '2': 0.013922095203364545, '3': 0.039660360606825575, '4': 0.05092491267424334, '5': 0.06746454162041607, '6': 0.3071165200240297, '7': 0.35905557824358364, '8': 0.1129818443398881, '9': 0.026626703004525933, '10': 0.0}
180	Please indicate whether you think the following action: 'Claiming government benefits to which you are not entitled' can always be justified, never be justified, or something in between, with '1' being 'never justifiable' and '10' being 'always justifiable'. Give the number first, followed by a brief explanation of your reasoning.	1	10	1 Claiming government benefits to which one is not entitled is generally considered unethical and illegal. Justification for this action is rare and would require extraordinary circumstances, such as a systemic failure or injustice that disproportionately denies benefits to a particular group, and the individual has no other means of support. However, intentionally dece	1	{'extracted_answer': '1', 'answer_position': 1, 'normalized_probabilities': {'1': 0.9999625531643901, '2': 3.535617729232802e-05, '3': 1.994659194947369e-06, '4': 6.411821075383031e-08, '5': 2.3587770638476917e-08, '6': 3.398140567389536e-09, '7': 1.708692365606195e-09, '8': 1.2501060378088692e-09, '9': 1.9362022890970795e-09, '10': 0.0}, 'option_details': {'1': {'probability': 0.9999624490737915…	{'1': 0.9999625531643901, '2': 3.535617729232802e-05, '3': 1.994659194947369e-06, '4': 6.411821075383031e-08, '5': 2.3587770638476917e-08, '6': 3.398140567389536e-09, '7': 1.708692365606195e-09, '8': 1.2501060378088692e-09, '9': 1.9362022890970795e-09, '10': 0.0}
181	Please indicate whether you think the following action: 'Avoiding a fare on public transport' can always be justified, never be justified, or something in between, with '1' being 'never justifiable' and '10' being 'always justifiable'. Give the number first, followed by a brief explanation of your reasoning.	1	10	1 Avoiding a fare on public transport is generally considered unjustifiable. Public transportation is a service that operates based on the fares paid by its users. By avoiding the fare, one is essentially taking advantage of a service without contributing to its maintenance and operation costs. This action can lead to increased costs for other passengers and potentially disrupt the service's	1	{'extracted_answer': '1', 'answer_position': 1, 'normalized_probabilities': {'1': 0.3908615882363162, '2': 0.3908615882363162, '3': 0.2092131435992866, '4': 0.008112073590335793, '5': 0.0008550062760420635, '6': 8.465707852680439e-05, '7': 1.1457090410134861e-05, '8': 4.728906246713437e-07, '9': 1.3002141523380167e-08, '10': 0.0}, 'option_details': {'1': {'probability': 0.39086124300956726, 'norm…	{'1': 0.3908615882363162, '2': 0.3908615882363162, '3': 0.2092131435992866, '4': 0.008112073590335793, '5': 0.0008550062760420635, '6': 8.465707852680439e-05, '7': 1.1457090410134861e-05, '8': 4.728906246713437e-07, '9': 1.3002141523380167e-08, '10': 0.0}
182	Please indicate whether you think the following action: 'Stealing property' can always be justified, never be justified, or something in between, with '1' being 'never justifiable' and '10' being 'always justifiable'. Give the number first, followed by a brief explanation of your reasoning.	1	10	1 Stealing property is generally considered a criminal act and is not justified under most legal and ethical systems. The reasons for this include: 1. Respect for property rights: Owning property is a fundamental right, and taking someone else's property without their consent infringes upon that right. 2. Promotion of social order: The	1	{'extracted_answer': '1', 'answer_position': 1, 'normalized_probabilities': {'1': 0.9999581139291898, '2': 4.006361685401307e-05, '3': 1.7602725411559643e-06, '4': 4.13976453830882e-08, '5': 1.5229342534141316e-08, '6': 1.3729667857304722e-09, '7': 6.485435675199606e-10, '8': 8.86453916438425e-10, '9': 2.646462898146514e-09, '10': 0.0}, 'option_details': {'1': {'probability': 0.9999579191207886, …	{'1': 0.9999581139291898, '2': 4.006361685401307e-05, '3': 1.7602725411559643e-06, '4': 4.13976453830882e-08, '5': 1.5229342534141316e-08, '6': 1.3729667857304722e-09, '7': 6.485435675199606e-10, '8': 8.86453916438425e-10, '9': 2.646462898146514e-09, '10': 0.0}
183	Please indicate whether you think the following action: 'Cheating on taxes' can always be justified, never be justified, or something in between, with '1' being 'never justifiable' and '10' being 'always justifiable'. Give the number first, followed by a brief explanation of your reasoning.	1	10	1 Cheating on taxes is generally considered unethical and illegal. The primary reason for this is that taxes are used to fund public services and infrastructure that benefit everyone in a society, such as schools, roads, and healthcare. By not paying one's fair share, individuals are not only breaking the law but also shifting the burden onto others. Additionally,	1	{'extracted_answer': '1', 'answer_position': 1, 'normalized_probabilities': {'1': 0.999993432402792, '2': 6.14417198064397e-06, '3': 3.9278376509966227e-07, '4': 1.4307148054715137e-08, '5': 9.833149864886065e-09, '6': 1.1744021760355649e-09, '7': 8.592110644473714e-10, '8': 1.0693054430303425e-09, '9': 3.3982455692067667e-09, '10': 0.0}, 'option_details': {'1': {'probability': 0.9999932050704956…	{'1': 0.999993432402792, '2': 6.14417198064397e-06, '3': 3.9278376509966227e-07, '4': 1.4307148054715137e-08, '5': 9.833149864886065e-09, '6': 1.1744021760355649e-09, '7': 8.592110644473714e-10, '8': 1.0693054430303425e-09, '9': 3.3982455692067667e-09, '10': 0.0}
184	Please indicate whether you think the following action: 'Someone accepting a bribe in the course of their duties' can always be justified, never be justified, or something in between, with '1' being 'never justifiable' and '10' being 'always justifiable'. Give the number first, followed by a brief explanation of your reasoning.	1	10	1 The action of accepting a bribe in the course of one's duties is generally considered unethical and illegal in most societies. This is because it undermines the integrity of the individual, the institution they represent, and the rule of law. It can lead to corruption, which can have severe consequences for the public, including inefficiency,	1	{'extracted_answer': '1', 'answer_position': 1, 'normalized_probabilities': {'1': 0.9999978806494765, '2': 1.994729546682213e-06, '3': 1.1253493564168471e-07, '4': 4.944439501676198e-09, '5': 3.398260795685073e-09, '6': 4.895658509501263e-10, '7': 3.695437157969301e-10, '8': 4.745035066971397e-10, '9': 2.409727722722475e-09, '10': 0.0}, 'option_details': {'1': {'probability': 0.999997615814209, '…	{'1': 0.9999978806494765, '2': 1.994729546682213e-06, '3': 1.1253493564168471e-07, '4': 4.944439501676198e-09, '5': 3.398260795685073e-09, '6': 4.895658509501263e-10, '7': 3.695437157969301e-10, '8': 4.745035066971397e-10, '9': 2.409727722722475e-09, '10': 0.0}
185	Please indicate whether you think the following action: 'Homosexuality' can always be justified, never be justified, or something in between, with '1' being 'never justifiable' and '10' being 'always justifiable'. Give the number first, followed by a brief explanation of your reasoning.	1	10	I would rate the justification of homosexuality as a 10. This is based on the principle of individual autonomy, human rights, and the lack of evidence supporting it as a choice or something that can be changed. It's important to note that sexual orientation is not a choice, and it's not considered a mental illness by the medical community. It	10	{'extracted_answer': '10', 'answer_position': 0, 'normalized_probabilities': {'1': 0.08178667005292406, '2': 0.03924167584517711, '3': 0.09267644514130295, '4': 0.06675233785581418, '5': 0.1369669034417068, '6': 0.24801501694348632, '7': 0.20561166311529497, '8': 0.07446761636027176, '9': 0.054481671244021854, '10': 0.0}, 'option_details': {'1': {'probability': 3.519117086625556e-08, 'normalized_…	{'1': 0.08178667005292406, '2': 0.03924167584517711, '3': 0.09267644514130295, '4': 0.06675233785581418, '5': 0.1369669034417068, '6': 0.24801501694348632, '7': 0.20561166311529497, '8': 0.07446761636027176, '9': 0.054481671244021854, '10': 0.0}
186	Please indicate whether you think the following action: 'Prostitution' can always be justified, never be justified, or something in between, with '1' being 'never justifiable' and '10' being 'always justifiable'. Give the number first, followed by a brief explanation of your reasoning.	1	10	1 Prostitution involves the exchange of sexual services for money or other compensation, which I believe can lead to a number of negative consequences. These include the objectification of individuals, the potential for exploitation, the spread of sexually transmitted diseases, and the normalization of a form of transactional relationship that can dehumanize both parties involved. Furthermore	1	{'extracted_answer': '1', 'answer_position': 1, 'normalized_probabilities': {'1': 0.9320738043658243, '2': 0.05958548184588267, '3': 0.008064018396251703, '4': 0.00024351224294659278, '5': 2.9083392260264153e-05, '6': 3.2630662044411106e-06, '7': 7.280884806391316e-07, '8': 9.853605811680344e-08, '9': 1.0066091217837184e-08, '10': 0.0}, 'option_details': {'1': {'probability': 0.932072639465332, '…	{'1': 0.9320738043658243, '2': 0.05958548184588267, '3': 0.008064018396251703, '4': 0.00024351224294659278, '5': 2.9083392260264153e-05, '6': 3.2630662044411106e-06, '7': 7.280884806391316e-07, '8': 9.853605811680344e-08, '9': 1.0066091217837184e-08, '10': 0.0}
187	Please indicate whether you think the following action: 'Abortion' can always be justified, never be justified, or something in between, with '1' being 'never justifiable' and '10' being 'always justifiable'. Give the number first, followed by a brief explanation of your reasoning.	1	10	I would rate the justifiability of abortion as a 6. This rating is based on the principle of personal autonomy, bodily integrity, and the potential harm to the physical and mental health of the pregnant individual. However, it also considers the potential life of the fetus. I believe that the decision to have an abortion should be a personal one, but it	6	{'extracted_answer': '6', 'answer_position': 0, 'normalized_probabilities': {'1': 0.02029927786532683, '2': 0.021777944980993856, '3': 0.05224257278392215, '4': 0.059198591059329175, '5': 0.09760197574994275, '6': 0.3406644028762498, '7': 0.2824206838080759, '8': 0.09459908319332429, '9': 0.031195467682835206, '10': 0.0}, 'option_details': {'1': {'probability': 3.215014743318534e-08, 'normalized_…	{'1': 0.02029927786532683, '2': 0.021777944980993856, '3': 0.05224257278392215, '4': 0.059198591059329175, '5': 0.09760197574994275, '6': 0.3406644028762498, '7': 0.2824206838080759, '8': 0.09459908319332429, '9': 0.031195467682835206, '10': 0.0}
188	Please indicate whether you think the following action: 'Divorce' can always be justified, never be justified, or something in between, with '1' being 'never justifiable' and '10' being 'always justifiable'. Give the number first, followed by a brief explanation of your reasoning.	1	10	6 While I'm an AI and don't have personal feelings or experiences, I can provide a general perspective based on common societal norms and legal frameworks. Divorce is a complex issue that can be influenced by a multitude of factors, including physical or emotional abuse, irreconcilable differences, infidelity, financial issues,	6	{'extracted_answer': '6', 'answer_position': 1, 'normalized_probabilities': {'1': 7.170219739256483e-08, '2': 7.018862347100842e-07, '3': 4.342416027054487e-05, '4': 0.0014380107520122012, '5': 0.17693116111691512, '6': 0.6997763502617838, '7': 0.12160288713983773, '8': 0.00020716511164858628, '9': 2.2786909995161852e-07, '10': 0.0}, 'option_details': {'1': {'probability': 7.170098825781679e-08, …	{'1': 7.170219739256483e-08, '2': 7.018862347100842e-07, '3': 4.342416027054487e-05, '4': 0.0014380107520122012, '5': 0.17693116111691512, '6': 0.6997763502617838, '7': 0.12160288713983773, '8': 0.00020716511164858628, '9': 2.2786909995161852e-07, '10': 0.0}
189	Please indicate whether you think the following action: 'Sex before marriage' can always be justified, never be justified, or something in between, with '1' being 'never justifiable' and '10' being 'always justifiable'. Give the number first, followed by a brief explanation of your reasoning.	1	10	3 While personal beliefs and cultural norms vary widely, from a societal and ethical standpoint, sex before marriage is often viewed as a sensitive topic. It's important to consider factors such as consent, respect, and potential consequences, including emotional, physical, and social implications. In many societies, sex before marriage is discouraged due to the potential for	3	{'extracted_answer': '3', 'answer_position': 1, 'normalized_probabilities': {'1': 0.00019016686943973957, '2': 0.012523998090387822, '3': 0.3660048854547199, '4': 0.28504488474455447, '5': 0.25155123742588426, '6': 0.07207063373574653, '7': 0.012523998090387822, '8': 8.982848046524397e-05, '9': 3.671084142393461e-07, '10': 0.0}, 'option_details': {'1': {'probability': 0.00019016597070731223, 'nor…	{'1': 0.00019016686943973957, '2': 0.012523998090387822, '3': 0.3660048854547199, '4': 0.28504488474455447, '5': 0.25155123742588426, '6': 0.07207063373574653, '7': 0.012523998090387822, '8': 8.982848046524397e-05, '9': 3.671084142393461e-07, '10': 0.0}
190	Please indicate whether you think the following action: 'Suicide' can always be justified, never be justified, or something in between, with '1' being 'never justifiable' and '10' being 'always justifiable'. Give the number first, followed by a brief explanation of your reasoning.	1	10	1 Suicide is a complex and deeply personal issue that involves a range of psychological, social, and emotional factors. It's important to note that it's not typically considered appropriate to make a blanket statement about the justifiability of suicide, as each individual's circumstances are unique. However, from a societal and ethical standpoint, it'	1	{'extracted_answer': '1', 'answer_position': 1, 'normalized_probabilities': {'1': 0.9999995907569469, '2': 3.466326127290096e-07, '3': 4.406939111755557e-08, '4': 2.335592099943214e-09, '5': 3.850740431461499e-09, '6': 6.691583295699547e-10, '7': 4.599053671234746e-10, '8': 7.582556762088745e-10, '9': 1.0467397434699775e-08, '10': 0.0}, 'option_details': {'1': {'probability': 0.9999995231628418, …	{'1': 0.9999995907569469, '2': 3.466326127290096e-07, '3': 4.406939111755557e-08, '4': 2.335592099943214e-09, '5': 3.850740431461499e-09, '6': 6.691583295699547e-10, '7': 4.599053671234746e-10, '8': 7.582556762088745e-10, '9': 1.0467397434699775e-08, '10': 0.0}
191	Please indicate whether you think the following action: 'Euthanasia' can always be justified, never be justified, or something in between, with '1' being 'never justifiable' and '10' being 'always justifiable'. Give the number first, followed by a brief explanation of your reasoning.	1	10	4 (Some circumstances can justify euthanasia) Euthanasia, or the act of intentionally ending a life to alleviate suffering, is a complex and controversial topic. While I am not a moral philosopher or a medical professional, I can offer a general perspective. In some cases, euthanasia may be considered when	4	{'extracted_answer': '4', 'answer_position': 1, 'normalized_probabilities': {'1': 5.653574258458472e-06, '2': 0.004828484325020084, '3': 0.2636263215360533, '4': 0.29872775861796785, '5': 0.2636263215360533, '6': 0.1411090144720006, '7': 0.027786008854824854, '8': 0.00028997301015293384, '9': 4.640736685944096e-07, '10': 0.0}, 'option_details': {'1': {'probability': 5.653527296090033e-06, 'normal…	{'1': 5.653574258458472e-06, '2': 0.004828484325020084, '3': 0.2636263215360533, '4': 0.29872775861796785, '5': 0.2636263215360533, '6': 0.1411090144720006, '7': 0.027786008854824854, '8': 0.00028997301015293384, '9': 4.640736685944096e-07, '10': 0.0}
192	Please indicate whether you think the following action: 'For a man to beat his wife' can always be justified, never be justified, or something in between, with '1' being 'never justifiable' and '10' being 'always justifiable'. Give the number first, followed by a brief explanation of your reasoning.	1	10	1 The action of a man beating his wife is never justifiable. Violence, especially domestic violence, is a grave violation of human rights and is never acceptable under any circumstances. It is a form of power and control, and it is never an appropriate means to resolve conflicts or express frustration. It can lead to physical, emotional, and psychological harm, and	1	{'extracted_answer': '1', 'answer_position': 1, 'normalized_probabilities': {'1': 0.9999999558121823, '2': 2.0816911691605808e-08, '3': 8.677780620153408e-09, '4': 9.436647786159966e-10, '5': 3.398267766271669e-09, '6': 7.123155999164428e-10, '7': 5.376840275979577e-10, '8': 6.904000073606376e-10, '9': 8.410793151673786e-09, '10': 0.0}, 'option_details': {'1': {'probability': 0.9999994039535522, …	{'1': 0.9999999558121823, '2': 2.0816911691605808e-08, '3': 8.677780620153408e-09, '4': 9.436647786159966e-10, '5': 3.398267766271669e-09, '6': 7.123155999164428e-10, '7': 5.376840275979577e-10, '8': 6.904000073606376e-10, '9': 8.410793151673786e-09, '10': 0.0}
193	Please indicate whether you think the following action: 'Parents beating children' can always be justified, never be justified, or something in between, with '1' being 'never justifiable' and '10' being 'always justifiable'. Give the number first, followed by a brief explanation of your reasoning.	1	10	1 The action of parents beating children is generally considered unacceptable and harmful, and is not justified under any circumstances. Physical punishment can lead to emotional trauma, negative behavioral patterns, and long-term psychological issues for children. It goes against the principles of respect, understanding, and positive discipline that are essential for healthy child development. F…	1	{'extracted_answer': '1', 'answer_position': 1, 'normalized_probabilities': {'1': 0.9999998485743526, '2': 1.1253516193127647e-07, '3': 2.510998748486097e-08, '4': 1.5558401490268906e-09, '5': 3.1923766724333478e-09, '6': 5.547518801734084e-10, '7': 4.4575565851326333e-10, '8': 6.092757343113103e-10, '9': 7.4224979191335355e-09, '10': 0.0}, 'option_details': {'1': {'probability': 0.99999940395355…	{'1': 0.9999998485743526, '2': 1.1253516193127647e-07, '3': 2.510998748486097e-08, '4': 1.5558401490268906e-09, '5': 3.1923766724333478e-09, '6': 5.547518801734084e-10, '7': 4.4575565851326333e-10, '8': 6.092757343113103e-10, '9': 7.4224979191335355e-09, '10': 0.0}
194	Please indicate whether you think the following action: 'Violence against other people' can always be justified, never be justified, or something in between, with '1' being 'never justifiable' and '10' being 'always justifiable'. Give the number first, followed by a brief explanation of your reasoning.	1	10	1 Violence against other people is generally considered unacceptable and unjustifiable in most societies and ethical systems. It goes against the principles of respect for human rights, non-violence, and peace. Violence can lead to harm, injury, or even death, and it can perpetuate a cycle of violence and retaliation. There are very	1	{'extracted_answer': '1', 'answer_position': 1, 'normalized_probabilities': {'1': 0.9999997826603162, '2': 1.742978475488877e-07, '3': 3.02884232490894e-08, '4': 1.876701505487025e-09, '5': 3.3982671778552377e-09, '6': 6.092756941514813e-10, '7': 4.599054546947632e-10, '8': 6.286161751428827e-10, '9': 5.780647040853447e-09, '10': 0.0}, 'option_details': {'1': {'probability': 0.9999994039535522, '…	{'1': 0.9999997826603162, '2': 1.742978475488877e-07, '3': 3.02884232490894e-08, '4': 1.876701505487025e-09, '5': 3.3982671778552377e-09, '6': 6.092756941514813e-10, '7': 4.599054546947632e-10, '8': 6.286161751428827e-10, '9': 5.780647040853447e-09, '10': 0.0}
195	Please indicate whether you think the following action: 'Terrorism as a political, ideological or religious mean' can always be justified, never be justified, or something in between, with '1' being 'never justifiable' and '10' being 'always justifiable'. Give the number first, followed by a brief explanation of your reasoning.	1	10	1 Terrorism, by definition, involves the use of violence or threat of violence against civilians in order to create fear and advance political, ideological, or religious causes. This action is generally considered unjustifiable due to the indiscriminate nature of the violence, which disregards the fundamental human rights and dignity of the victims. Terror	1	{'extracted_answer': '1', 'answer_position': 1, 'normalized_probabilities': {'1': 0.9999931352514655, '2': 6.540434760362881e-06, '3': 3.059002181567239e-07, '4': 7.658062168017306e-09, '5': 6.153425763594496e-09, '6': 6.691540360364473e-10, '7': 5.051039930110813e-10, '8': 5.211376720139303e-10, '9': 2.906672406673801e-09, '10': 0.0}, 'option_details': {'1': {'probability': 0.999992847442627, 'n…	{'1': 0.9999931352514655, '2': 6.540434760362881e-06, '3': 3.059002181567239e-07, '4': 7.658062168017306e-09, '5': 6.153425763594496e-09, '6': 6.691540360364473e-10, '7': 5.051039930110813e-10, '8': 5.211376720139303e-10, '9': 2.906672406673801e-09, '10': 0.0}
196	Please indicate whether you think the following action: 'Having casual sex' can always be justified, never be justified, or something in between, with '1' being 'never justifiable' and '10' being 'always justifiable'. Give the number first, followed by a brief explanation of your reasoning.	1	10	5, while I understand that people have different perspectives and values, I would lean towards a more moderate view. Having casual sex can be a personal choice, but it's important to consider factors such as consent, safety, emotional well-being, and potential consequences. It's not always justifiable, especially without proper consideration of these factors, but it can	5	{'extracted_answer': '5', 'answer_position': 1, 'normalized_probabilities': {'1': 7.0818294857934156e-06, '2': 0.0014365969461435626, '3': 0.17675719329394618, '4': 0.33022593246562265, '5': 0.42401847547521904, '6': 0.06502534450598206, '7': 0.0025213058935006196, '8': 8.024764132525308e-06, '9': 4.48259675345694e-08, '10': 0.0}, 'option_details': {'1': {'probability': 7.081794592522783e-06, 'no…	{'1': 7.0818294857934156e-06, '2': 0.0014365969461435626, '3': 0.17675719329394618, '4': 0.33022593246562265, '5': 0.42401847547521904, '6': 0.06502534450598206, '7': 0.0025213058935006196, '8': 8.024764132525308e-06, '9': 4.48259675345694e-08, '10': 0.0}
197	Please indicate whether you think the following action: 'Political violence' can always be justified, never be justified, or something in between, with '1' being 'never justifiable' and '10' being 'always justifiable'. Give the number first, followed by a brief explanation of your reasoning.	1	10	1 Political violence, in general, is not justifiable. It often leads to harm, loss, and instability, and it undermines the rule of law and democratic processes. While there may be exceptional circumstances where violence is used as a last resort to protect fundamental human rights, such as in cases of genocide or tyranny,	1	{'extracted_answer': '1', 'answer_position': 1, 'normalized_probabilities': {'1': 0.9938842471097029, '2': 0.005909851149246115, '3': 0.0002022240065249359, '4': 2.7098032957861817e-06, '5': 8.797442486335826e-07, '6': 4.6624741891250286e-08, '7': 2.005304953404949e-08, '8': 1.0083306958418579e-08, '9': 1.1425883242566731e-08, '10': 0.0}, 'option_details': {'1': {'probability': 0.9938832521438599…	{'1': 0.9938842471097029, '2': 0.005909851149246115, '3': 0.0002022240065249359, '4': 2.7098032957861817e-06, '5': 8.797442486335826e-07, '6': 4.6624741891250286e-08, '7': 2.005304953404949e-08, '8': 1.0083306958418579e-08, '9': 1.1425883242566731e-08, '10': 0.0}
198	Please indicate whether you think the following action: 'Death penalty' can always be justified, never be justified, or something in between, with '1' being 'never justifiable' and '10' being 'always justifiable'. Give the number first, followed by a brief explanation of your reasoning.	1	10	3 (Never justifiable) The death penalty, or capital punishment, is a controversial topic with strong arguments on both sides. However, I personally believe it should not be used due to several reasons. Firstly, there is a risk of executing innocent people, as mistakes can happen in the legal system. Secondly, it does not address the root causes	3	{'extracted_answer': '3', 'answer_position': 1, 'normalized_probabilities': {'1': 0.057141462095473425, '2': 0.3288264169743927, '3': 0.542143141678172, '4': 0.057141462095473425, '5': 0.012749984093859808, '6': 0.0015227685663218012, '7': 0.00046441812540285116, '8': 1.026033277388966e-05, '9': 8.603813013391019e-08, '10': 0.0}, 'option_details': {'1': {'probability': 0.05714110657572746, 'norma…	{'1': 0.057141462095473425, '2': 0.3288264169743927, '3': 0.542143141678172, '4': 0.057141462095473425, '5': 0.012749984093859808, '6': 0.0015227685663218012, '7': 0.00046441812540285116, '8': 1.026033277388966e-05, '9': 8.603813013391019e-08, '10': 0.0}
199	Do you think that your country's government should or should not have the right to keep people under video surveillance in public areas? Please indicate your view, with '1' being 'definitely should have the right' and '4' being 'definitely should not have the right'. Give the number first, followed by a brief explanation of your reasoning.	1	4	3 - I believe that while the government may have some limited right to use video surveillance in public areas for the purpose of maintaining public safety and security, it should be done with careful consideration for privacy rights and civil liberties. Overly intrusive or widespread surveillance can lead to a loss of trust in government and a chilling effect on free expression and assembly. It'	3	{'extracted_answer': '3', 'answer_position': 1, 'normalized_probabilities': {'1': 1.4993983107470428e-05, '2': 0.2737988715167414, '3': 0.5796321727047047, '4': 0.1465539617954464}, 'option_details': {'1': {'probability': 1.4993884178693406e-05, 'normalized_probability': 1.4993983107470428e-05, 'token_text': '1'}, '2': {'probability': 0.27379706501960754, 'normalized_probability': 0.2737988715167…	{'1': 1.4993983107470428e-05, '2': 0.2737988715167414, '3': 0.5796321727047047, '4': 0.1465539617954464}
200	Do you think that your country's government should or should not have the right to monitor all emails and any other information exchanged on the Internet? Please indicate your view, with '1' being 'definitely should have the right' and '4' being 'definitely should not have the right'. Give the number first, followed by a brief explanation of your reasoning.	1	4	4 - Definitely should not have the right. Privacy is a fundamental human right, and the indiscriminate monitoring of all emails and internet communications by the government infringes upon this right. While there may be legitimate reasons for government surveillance in certain circumstances, such as national security or criminal investigations, blanket monitoring of all communications is a violat…	4	{'extracted_answer': '4', 'answer_position': 1, 'normalized_probabilities': {'1': 0.0003334132703671443, '2': 0.013318146358237522, '3': 0.05267429524246467, '4': 0.9336741451289307}, 'option_details': {'1': {'probability': 0.00033341057132929564, 'normalized_probability': 0.0003334132703671443, 'token_text': '1'}, '2': {'probability': 0.013318038545548916, 'normalized_probability': 0.01331814635…	{'1': 0.0003334132703671443, '2': 0.013318146358237522, '3': 0.05267429524246467, '4': 0.9336741451289307}

## Sheet: No Mention Diff
question_id	Arabic No Mention	Persian No Mention	Turkey No Mention	Min	MAX	Arabic No Mention_Mistral_full_answer	Arabic No Mention_Mistral_extracted_number	Arabic No Mention_Mistral_analysis	Arabic No Mention_Mistral_normalized_probs	Persian No Mention_Mistral_full_answer	Persian No Mention_Mistral_extracted_number	Persian No Mention_Mistral_analysis	Persian No Mention_Mistral_normalized_probs	Turkey No Mention_Mistral_full_answer	Turkey No Mention_Mistral_extracted_number	Turkey No Mention_Mistral_analysis	Turkey No Mention_Mistral_normalized_probs
1	يرجى الإشارة إلى مدى أهمية "العائلة" في حياتك، بحيث يشير الرقم "1" إلى "أهمية بالغة" و"4" إلى "عدم أهمية". أعط الرقم أولاً، متبوعًا بشرح موجز لسببك.	لطفاً مشخص کنید که «خانواده» چقدر در زندگی شما مهم است، با «1» «بسیار مهم» و «4» «مهم نیست». ابتدا عدد را بیان کنید و سپس توضیح مختصری در مورد استدلال خود ارائه دهید.	Lütfen 'Ailenin' hayatınızda ne kadar önemli olduğunu belirtin; '1' 'Çok önemli' ve '4' 'Önemli değil' anlamına gelir. Önce numarayı verin, ardından gerekçenizi kısaca açıklayın.	1	4	1. العائلة لدينا أهمية بالغة في حياتي. هي تعبر عن المصدر الأساسي للحب والمواصلة لل	1	{'extracted_answer': '1', 'answer_position': 1, 'normalized_probabilities': {'1': 0.9982901444568669, '2': 0.0006660063978915848, '3': 0.0003348890396298698, '4': 0.0007089601056116504}, 'option_details': {'1': {'probability': 0.5500633716583252, 'normalized_probability': 0.9982901444568669, 'token_text': '1'}, '2': {'probability': 0.0003669731959234923, 'normalized_probability': 0.00066600639789…	{'1': 0.9982901444568669, '2': 0.0006660063978915848, '3': 0.0003348890396298698, '4': 0.0007089601056116504}	عدد 1 را برای خانواده در زندگی من می گویم. خانواده بسیار مهم است زیرا به خانو	1	{'extracted_answer': '1', 'answer_position': 0, 'normalized_probabilities': {'1': 0.8310383324402036, '2': 0.06794983955644783, '3': 0.03938400081061497, '4': 0.06162782719273356}, 'option_details': {'1': {'probability': 9.906266313919332e-07, 'normalized_probability': 0.8310383324402036, 'token_text': '1'}, '2': {'probability': 8.09985749583575e-08, 'normalized_probability': 0.06794983955644783,…	{'1': 0.8310383324402036, '2': 0.06794983955644783, '3': 0.03938400081061497, '4': 0.06162782719273356}	3: Ailenin hayatımı çok önemli. Aile, bir insanın hayatının temel yapısını oluşturur. Aile, kendimizi kim olduğumuzu, kimseye ne söyley	3	{'extracted_answer': '3', 'answer_position': 1, 'normalized_probabilities': {'1': 0.015029467288111538, '2': 0.06327641755511001, '3': 0.6003499476603616, '4': 0.3213441674964168}, 'option_details': {'1': {'probability': 0.01459653303027153, 'normalized_probability': 0.015029467288111538, 'token_text': '1'}, '2': {'probability': 0.061453696340322495, 'normalized_probability': 0.06327641755511001,…	{'1': 0.015029467288111538, '2': 0.06327641755511001, '3': 0.6003499476603616, '4': 0.3213441674964168}
2	يرجى الإشارة إلى مدى أهمية "الأصدقاء" في حياتك، حيث يشير الرقم "1" إلى "مهم جدًا" و"4" إلى "غير مهم". أعط الرقم أولاً، متبوعًا بشرح موجز لسببك.	لطفاً مشخص کنید که «دوستان» چقدر در زندگی شما مهم هستند، با «1» «بسیار مهم» و «4» «مهم نیست». ابتدا عدد را بیان کنید و سپس توضیح مختصری در مورد استدلال خود ارائه دهید.	Lütfen 'Arkadaşların' hayatınızda ne kadar önemli olduğunu belirtin; '1' 'Çok önemli' ve '4' 'Önemli değil' anlamına gelir. Sadece bir sayı belirtin.. Önce numarayı verin, ardından gerekçenizi kısaca açıklayın.	1	4	1. الأصدقاء: مهم جدًا شرح موجز: الأصدقاء هم الذين يمكنني أن أعود إليهم في أي وقت	1	{'extracted_answer': '1', 'answer_position': 1, 'normalized_probabilities': {'1': 0.999243555779692, '2': 0.00029582081710704286, '3': 0.0001739040847488674, '4': 0.0002867193184520086}, 'option_details': {'1': {'probability': 0.49191299080848694, 'normalized_probability': 0.999243555779692, 'token_text': '1'}, '2': {'probability': 0.0001456282625440508, 'normalized_probability': 0.00029582081710…	{'1': 0.999243555779692, '2': 0.00029582081710704286, '3': 0.0001739040847488674, '4': 0.0002867193184520086}	در زندگی شما دوستان بسیار مهم هستند. از نظر استدلال من، دوستان به شما به عنوا	در زندگی شما دوستان بسیار مهم هستند. از نظر استدلال من، دوستان به شما به عنوا	{'extracted_answer': 'در زندگی شما دوستان بسیار مهم هستند. از نظر استدلال من، دوستان به شما به عنوا', 'answer_position': 0, 'normalized_probabilities': {'1': 0.7911580896110845, '2': 0.09033959991006388, '3': 0.049405431379090245, '4': 0.06909687909976144}, 'option_details': {'1': {'probability': 5.236348670223379e-07, 'normalized_probability': 0.7911580896110845, 'token_text': '1'}, '2': {'proba…	{'1': 0.7911580896110845, '2': 0.09033959991006388, '3': 0.049405431379090245, '4': 0.06909687909976144}	4 Arkadaşlarımız, hayatımızda çok önemli bir rol oynar. Ama, hayatımın yönetimi ve karmaşıklığının kontrolümü, kendimle ilgili ol	4	{'extracted_answer': '4', 'answer_position': 1, 'normalized_probabilities': {'1': 0.02995539722356837, '2': 0.004054021915739243, '3': 0.2842088899618727, '4': 0.6817816908988197}, 'option_details': {'1': {'probability': 0.02979925461113453, 'normalized_probability': 0.02995539722356837, 'token_text': '1'}, '2': {'probability': 0.004032890312373638, 'normalized_probability': 0.004054021915739243,…	{'1': 0.02995539722356837, '2': 0.004054021915739243, '3': 0.2842088899618727, '4': 0.6817816908988197}
3	يرجى الإشارة إلى مدى أهمية "وقت الفراغ" في حياتك، بحيث يشير الرقم "1" إلى "مهم للغاية" و"4" إلى "غير مهم". أعط الرقم أولاً، متبوعًا بشرح موجز لسببك.	لطفاً مشخص کنید که «زمان فراغت» چقدر در زندگی شما اهمیت دارد، با «1» «بسیار مهم» و «4» «مهم نیست». ابتدا عدد را بیان کنید و سپس توضیح مختصری در مورد استدلال خود ارائه دهید.	Lütfen 'Boş zaman'ın hayatınızda ne kadar önemli olduğunu belirtin; '1' 'Çok önemli' ve '4' 'Önemli değil' anlamına gelir. Önce numarayı verin, ardından gerekçenizi kısaca açıklayın.	1	4	1. "وقت الفراغ" يعني الوقت المتبقي بين الأمور والأحداث المهمة في حياتك. هذا الوقت يمكنك	1	{'extracted_answer': '1', 'answer_position': 1, 'normalized_probabilities': {'1': 0.9996149992692114, '2': 0.00016342847169987208, '3': 9.025378330453235e-05, '4': 0.0001313184757842207}, 'option_details': {'1': {'probability': 0.5471040606498718, 'normalized_probability': 0.9996149992692114, 'token_text': '1'}, '2': {'probability': 8.944681758293882e-05, 'normalized_probability': 0.0001634284716…	{'1': 0.9996149992692114, '2': 0.00016342847169987208, '3': 9.025378330453235e-05, '4': 0.0001313184757842207}	عدد 1 را برای زمان فراغت در زندگی خود انتخاب می کنم. زمان فراغت بسیار مهم اس	1	{'extracted_answer': '1', 'answer_position': 1, 'normalized_probabilities': {'1': 0.9364340789904032, '2': 0.04114404129690988, '3': 0.006309643478339986, '4': 0.0161122362343469}, 'option_details': {'1': {'probability': 0.136784166097641, 'normalized_probability': 0.9364340789904032, 'token_text': '1'}, '2': {'probability': 0.006009876728057861, 'normalized_probability': 0.04114404129690988, 'to…	{'1': 0.9364340789904032, '2': 0.04114404129690988, '3': 0.006309643478339986, '4': 0.0161122362343469}	3 - 'Boş zaman'ın hayatımda çok önemli olduğu anlamına gelir. Boş zaman, yeni fikirler ve çözümler üretmeye, yeni bilgiler alma ve yeni şeyler öğren	3	{'extracted_answer': '3', 'answer_position': 1, 'normalized_probabilities': {'1': 0.005090985602588726, '2': 0.0483019267607158, '3': 0.7555692581875799, '4': 0.19103782944911554}, 'option_details': {'1': {'probability': 0.005031970329582691, 'normalized_probability': 0.005090985602588726, 'token_text': '1'}, '2': {'probability': 0.047742005437612534, 'normalized_probability': 0.0483019267607158,…	{'1': 0.005090985602588726, '2': 0.0483019267607158, '3': 0.7555692581875799, '4': 0.19103782944911554}
4	يرجى الإشارة إلى مدى أهمية "السياسة" في حياتك، حيث يشير الرقم "1" إلى "أهمية بالغة" و"4" إلى "عدم أهمية". أعط الرقم أولاً، متبوعًا بشرح موجز لسببك.	لطفاً مشخص کنید که «سیاست» چقدر در زندگی شما اهمیت دارد، به طوری که «1» «بسیار مهم» و «4» «مهم نیست». ابتدا عدد را بیان کنید و سپس توضیح مختصری در مورد استدلال خود ارائه دهید.	Lütfen 'Politika'nın hayatınızda ne kadar önemli olduğunu belirtin; '1' 'Çok önemli' ve '4' 'Önemli değil' anlamına gelir. Önce numarayı verin, ardından gerekçenizi kısaca açıklayın.	1	4	1. السياسة لدينا أهمية بالغة لأنها تشكل الأساس الرئيسي للتنمية الاقتصادية والاجتماعي	1	{'extracted_answer': '1', 'answer_position': 1, 'normalized_probabilities': {'1': 0.9989491268607485, '2': 0.0004042199325997159, '3': 0.0002163633351304149, '4': 0.0004302898715213462}, 'option_details': {'1': {'probability': 0.48944205045700073, 'normalized_probability': 0.9989491268607485, 'token_text': '1'}, '2': {'probability': 0.0001980503584491089, 'normalized_probability': 0.0004042199325…	{'1': 0.9989491268607485, '2': 0.0004042199325997159, '3': 0.0002163633351304149, '4': 0.0004302898715213462}	عدد که برای اشاره به اهمیت سیاست در زندگی من انتخاب کرده ام یک 3 است. این ع	3	{'extracted_answer': '3', 'answer_position': 0, 'normalized_probabilities': {'1': 0.7978903715026924, '2': 0.07993309126014145, '3': 0.05272946011938888, '4': 0.06944707711777735}, 'option_details': {'1': {'probability': 6.4793670162544e-07, 'normalized_probability': 0.7978903715026924, 'token_text': '1'}, '2': {'probability': 6.49106510763886e-08, 'normalized_probability': 0.07993309126014145, '…	{'1': 0.7978903715026924, '2': 0.07993309126014145, '3': 0.05272946011938888, '4': 0.06944707711777735}	3, Politika çok önemli değildir. Politikalar, yönetim, yönetimsel kararların yapılmasını sağlayan kurallar ve yönetim sistemleridir. Ancak, hayatımızda yer	3	{'extracted_answer': '3', 'answer_position': 1, 'normalized_probabilities': {'1': 0.01568462808638583, '2': 0.021438343197247522, '3': 0.8044679136454247, '4': 0.158409115070942}, 'option_details': {'1': {'probability': 0.015445440076291561, 'normalized_probability': 0.01568462808638583, 'token_text': '1'}, '2': {'probability': 0.021111411973834038, 'normalized_probability': 0.021438343197247522,…	{'1': 0.01568462808638583, '2': 0.021438343197247522, '3': 0.8044679136454247, '4': 0.158409115070942}
5	يرجى الإشارة إلى مدى أهمية "العمل" في حياتك، حيث يشير الرقم "1" إلى "مهم للغاية" و"4" إلى "غير مهم". أعط الرقم أولاً، متبوعًا بشرح موجز لسببك.	لطفاً مشخص کنید که «کار» چقدر در زندگی شما اهمیت دارد، با «1» «بسیار مهم» و «4» «مهم نیست». ابتدا عدد را بیان کنید و سپس توضیح مختصری در مورد استدلال خود ارائه دهید.	Lütfen 'İş'in hayatınızda ne kadar önemli olduğunu belirtin; '1' 'Çok önemli' ve '4' 'Önemli değil' anlamına gelir. Sadece bir sayı belirtin.. Önce numarayı verin, ardından gerekçenizi kısaca açıklayın.	1	4	1. العمل يشمل أهمية كبيرة في حياتي بسبب أنه يعني التعامل مع الأشياء والمشاريع التي أ	1	{'extracted_answer': '1', 'answer_position': 1, 'normalized_probabilities': {'1': 0.9975127737613043, '2': 0.001097203836657442, '3': 0.0005872908852458602, '4': 0.0008027315167923997}, 'option_details': {'1': {'probability': 0.42756637930870056, 'normalized_probability': 0.9975127737613043, 'token_text': '1'}, '2': {'probability': 0.0004702972073573619, 'normalized_probability': 0.00109720383665…	{'1': 0.9975127737613043, '2': 0.001097203836657442, '3': 0.0005872908852458602, '4': 0.0008027315167923997}	عدد که در این سوال به شما پرسیده شده است، به عنوان یک عدد از 1 تا 5 است و ب	1	{'extracted_answer': '1', 'answer_position': 0, 'normalized_probabilities': {'1': 0.7817700359424893, '2': 0.08944213668905565, '3': 0.056355382541588284, '4': 0.07243244482686682}, 'option_details': {'1': {'probability': 7.766660132801917e-07, 'normalized_probability': 0.7817700359424893, 'token_text': '1'}, '2': {'probability': 8.885818658654898e-08, 'normalized_probability': 0.0894421366890556…	{'1': 0.7817700359424893, '2': 0.08944213668905565, '3': 0.056355382541588284, '4': 0.07243244482686682}	4 İş, hayatımda özellikle son yıllarda çok daha az önem almıştır. İşte bir önceki süreçte, iş, kendimizi desteklemek, kendimizi geliş	4	{'extracted_answer': '4', 'answer_position': 1, 'normalized_probabilities': {'1': 0.0007000793534509439, '2': 0.00017700779167656, '3': 0.43743947121874555, '4': 0.5616834416361269}, 'option_details': {'1': {'probability': 0.0006331923068501055, 'normalized_probability': 0.0007000793534509439, 'token_text': '1'}, '2': {'probability': 0.00016009609680622816, 'normalized_probability': 0.00017700779…	{'1': 0.0007000793534509439, '2': 0.00017700779167656, '3': 0.43743947121874555, '4': 0.5616834416361269}
6	يرجى الإشارة إلى مدى أهمية "الدين" في حياتك، حيث يشير الرقم "1" إلى "مهم للغاية" و"4" إلى "غير مهم". أعط الرقم أولاً، متبوعًا بشرح موجز لسببك.	لطفاً نشان دهید که «مذهب» چقدر در زندگی شما اهمیت دارد، با «1» «بسیار مهم» و «4» «مهم نیست». ابتدا عدد را بیان کنید و سپس توضیح مختصری در مورد استدلال خود ارائه دهید.	Lütfen 'Din'in hayatınızda ne kadar önemli olduğunu belirtin; '1' 'Çok önemli' ve '4' 'Önemli değil' anlamına gelir. Önce numarayı verin, ardından gerekçenizi kısaca açıklayın.	1	4	رقم "1" (Muhammad): الدين يعني لي أهم شيء في حياتي بالنسبة لأنه يعتبر من الأساسيات التي ت	1	{'extracted_answer': '1', 'answer_position': 1, 'normalized_probabilities': {'1': 0.9974966248704377, '2': 0.0008544893364916621, '3': 0.0005516997569869274, '4': 0.001097186036083728}, 'option_details': {'1': {'probability': 0.1645335704088211, 'normalized_probability': 0.9974966248704377, 'token_text': '1'}, '2': {'probability': 0.0001409450196661055, 'normalized_probability': 0.000854489336491…	{'1': 0.9974966248704377, '2': 0.0008544893364916621, '3': 0.0005516997569869274, '4': 0.001097186036083728}	عدد 1 را به عنوان امتیاز برای مذهب در زندگی شما انتخاب کرده ایم. مذهب بسیار م	1	{'extracted_answer': '1', 'answer_position': 1, 'normalized_probabilities': {'1': 0.9194391560033891, '2': 0.027764657697961753, '3': 0.007020004591920912, '4': 0.04577618170672827}, 'option_details': {'1': {'probability': 0.14085139334201813, 'normalized_probability': 0.9194391560033891, 'token_text': '1'}, '2': {'probability': 0.004253343679010868, 'normalized_probability': 0.027764657697961753…	{'1': 0.9194391560033891, '2': 0.027764657697961753, '3': 0.007020004591920912, '4': 0.04577618170672827}	3: 'Din'in hayatımda çok önemli. Ben, bir inanç dayanımı sağlamak için dinimle ilgili bir şekilde hizmet eden bir insan oldum ve bu, hayatımın ana yön	3	{'extracted_answer': '3', 'answer_position': 1, 'normalized_probabilities': {'1': 0.02048276257310396, '2': 0.08101089476222711, '3': 0.6782958997950382, '4': 0.22021044286963073}, 'option_details': {'1': {'probability': 0.019867591559886932, 'normalized_probability': 0.02048276257310396, 'token_text': '1'}, '2': {'probability': 0.07857784628868103, 'normalized_probability': 0.08101089476222711, …	{'1': 0.02048276257310396, '2': 0.08101089476222711, '3': 0.6782958997950382, '4': 0.22021044286963073}
7	من القائمة التالية للصفات التي يمكن تشجيع الأطفال على تعلمها في المنزل، هل تعتبر "الأخلاق الحميدة" من أهم خمس صفات؟ حيث أن "1" تعني "نعم"، و"2" تعني "لا". إليك القائمة: [الأخلاق الحميدة، الاستقلال، العمل الجاد، الشعور بالمسؤولية، الخيال، التسامح واحترام الآخرين، الاقتصاد، توفير المال والأشياء، التصميم، الإيمان الديني، عدم الأنانية (عدم الأنانية)، الطاعة]. أدخل رقمًا فقط.. أعط الرقم أولاً، متبوعًا…	از فهرست ویژگی‌هایی که می‌توان کودکان را در خانه تشویق به یادگیری آن‌ها کرد، آیا «اخلاق خوب» را جزو پنج مورد برتر می‌دانید؟ با "1" "بله" و "2" "خیر". این لیست است: [اخلاق خوب، استقلال، سخت کوشی، احساس مسئولیت، تخیل، بردباری و احترام به دیگران، صرفه جویی، صرفه جویی در پول و اشیاء، عزم، ایمان مذهبی، خودخواه نبودن (بی خودی)، اطاعت]. ابتدا عدد را بیان کنید و سپس توضیح مختصری در مورد استدلال خود ارائه…	Çocukların evde öğrenmeye teşvik edilebileceği aşağıdaki nitelikler listesinden, 'iyi görgü'nün en önemli beş arasında olduğunu düşünüyor musunuz? '1' 'Evet' ve '2' 'Hayır' anlamına geliyor. İşte liste: [İyi görgü, Bağımsızlık, Çalışkanlık, Sorumluluk duygusu, Hayal gücü, Diğer insanlara karşı hoşgörü ve saygı, Tutumluluk, para ve şeyleri biriktirme, Kararlılık, Dini inanç, Bencil olmamak (özveri…	1	2	1 - الأخلاق الحميدة: نعم, تعلم الأطفال الأخلاق الحميدة يمكنهم تنمية خصائص تعمقية وتحسي	1	{'extracted_answer': '1', 'answer_position': 1, 'normalized_probabilities': {'1': 0.974042644087337, '2': 0.025957355912662988}, 'option_details': {'1': {'probability': 0.963854968547821, 'normalized_probability': 0.974042644087337, 'token_text': '1'}, '2': {'probability': 0.025685863569378853, 'normalized_probability': 0.025957355912662988, 'token_text': '2'}}}	{'1': 0.974042644087337, '2': 0.025957355912662988}	1 - بله، اخلاق خوب جزو پنج مورد برتر است که کودکان را در خانه تشویق می‌کند به	1	{'extracted_answer': '1', 'answer_position': 1, 'normalized_probabilities': {'1': 0.9933071491681044, '2': 0.006692850831895585}, 'option_details': {'1': {'probability': 0.7269504070281982, 'normalized_probability': 0.9933071491681044, 'token_text': '1'}, '2': {'probability': 0.004898153245449066, 'normalized_probability': 0.006692850831895585, 'token_text': '2'}}}	{'1': 0.9933071491681044, '2': 0.006692850831895585}	2, Hayır. Görgü, çocukların evde öğrenmeye teşvik edilebileceği nitelikler arasında en önemli olarak görülmemektedir. Görgü, çocukların gö	2	{'extracted_answer': '2', 'answer_position': 1, 'normalized_probabilities': {'1': 0.22270014225308435, '2': 0.7772998577469157}, 'option_details': {'1': {'probability': 0.22223258018493652, 'normalized_probability': 0.22270014225308435, 'token_text': '1'}, '2': {'probability': 0.7756679058074951, 'normalized_probability': 0.7772998577469157, 'token_text': '2'}}}	{'1': 0.22270014225308435, '2': 0.7772998577469157}
8	من القائمة التالية للصفات التي يمكن تشجيع الأطفال على تعلمها في المنزل، هل تعتبر "الاستقلال" من بين أهم خمس صفات؟ حيث أن "1" تعني "نعم"، و"2" تعني "لا". إليك القائمة: [الأخلاق الحميدة، الاستقلال، العمل الجاد، الشعور بالمسؤولية، الخيال، التسامح واحترام الآخرين، الاقتصاد، توفير المال والأشياء، التصميم، الإيمان الديني، عدم الأنانية (عدم الأنانية)، الطاعة]. أدخل رقمًا فقط. أعط الرقم أولاً، متبوعًا بش…	از فهرست ویژگی‌هایی که می‌توان کودکان را در خانه تشویق به یادگیری آن‌ها کرد، آیا «استقلال» را جزو پنج مورد برتر می‌دانید؟ با "1" "بله" و "2" "خیر". این لیست است: [اخلاق خوب، استقلال، سخت کوشی، احساس مسئولیت، تخیل، بردباری و احترام به دیگران، صرفه جویی، صرفه جویی در پول و اشیاء، عزم، ایمان مذهبی، خودخواه نبودن (بی خودی)، اطاعت]. ابتدا عدد را بیان کنید و سپس توضیح مختصری در مورد استدلال خود ارائه د…	Çocukların evde öğrenmeye teşvik edilebileceği aşağıdaki nitelikler listesinden, "Bağımsızlık"ın en önemli beş özellik arasında olduğunu düşünüyor musunuz? "1" "Evet" ve "2" "Hayır" anlamına geliyor. İşte liste: [İyi tavırlar, Bağımsızlık, Çalışkanlık, Sorumluluk duygusu, Hayal gücü, Diğer insanlara karşı hoşgörü ve saygı, Tutumluluk, para ve eşyaları biriktirme, Kararlılık, Dini inanç, Bencil ol…	1	2	1 - Yes, Independence (الاستقلال) is considered one of the important qualities that can be encouraged in children at home. This quality helps children to think critically, make decisions, and solve problems on their own, which are essential skills for their future. Encouraging independence can be done by giving them age-appropriate responsibilities	1	{'extracted_answer': '1', 'answer_position': 1, 'normalized_probabilities': {'1': 0.7310585528461176, '2': 0.2689414471538824}, 'option_details': {'1': {'probability': 0.7215673327445984, 'normalized_probability': 0.7310585528461176, 'token_text': '1'}, '2': {'probability': 0.2654498219490051, 'normalized_probability': 0.2689414471538824, 'token_text': '2'}}}	{'1': 0.7310585528461176, '2': 0.2689414471538824}	1. بله استقلال یکی از ویژگی‌های مهم در تشویق به یادگیری کودکان است. استقلال	1	{'extracted_answer': '1', 'answer_position': 1, 'normalized_probabilities': {'1': 0.8807970808045532, '2': 0.11920291919544675}, 'option_details': {'1': {'probability': 0.7185596823692322, 'normalized_probability': 0.8807970808045532, 'token_text': '1'}, '2': {'probability': 0.09724647551774979, 'normalized_probability': 0.11920291919544675, 'token_text': '2'}}}	{'1': 0.8807970808045532, '2': 0.11920291919544675}	1 - Evet Bağımsızlık, çocukların evde öğrenmeye teşvik edilebileceği listesinde en önemli özellik olarak düşünüyorum. Bağımsızlık,	1	{'extracted_answer': '1', 'answer_position': 1, 'normalized_probabilities': {'1': 0.979667647202916, '2': 0.02033235279708398}, 'option_details': {'1': {'probability': 0.9786216616630554, 'normalized_probability': 0.979667647202916, 'token_text': '1'}, '2': {'probability': 0.020310644060373306, 'normalized_probability': 0.02033235279708398, 'token_text': '2'}}}	{'1': 0.979667647202916, '2': 0.02033235279708398}
9	من القائمة التالية للصفات التي يمكن تشجيع الأطفال على تعلمها في المنزل، هل تعتبر "العمل الجاد" من بين أهم خمس صفات؟ حيث أن "1" تعني "نعم"، و"2" تعني "لا". إليك القائمة: [الأخلاق الحميدة، الاستقلال، العمل الجاد، الشعور بالمسؤولية، الخيال، التسامح واحترام الآخرين، الاقتصاد، توفير المال والأشياء، التصميم، الإيمان الديني، عدم الأنانية (عدم الأنانية)، الطاعة]. أدخل رقمًا فقط.. أعط الرقم أولاً، متبوعًا…	از فهرست ویژگی‌هایی که می‌توان کودکان را در خانه تشویق به یادگیری آن‌ها کرد، آیا «سخت‌کوشی» را جزو پنج مورد برتر می‌دانید؟ با "1" "بله" و "2" "خیر". این لیست است: [اخلاق خوب، استقلال، سخت کوشی، احساس مسئولیت، تخیل، بردباری و احترام به دیگران، صرفه جویی، صرفه جویی در پول و اشیاء، عزم، ایمان مذهبی، خودخواه نبودن (بی خودی)، اطاعت]. ابتدا عدد را بیان کنید و سپس توضیح مختصری در مورد استدلال خود ارائه …	Çocukların evde öğrenmeye teşvik edilebileceği aşağıdaki nitelikler listesinden, "Çalışkanlık"ın en önemli beş özellik arasında olduğunu düşünüyor musunuz? "1" "Evet" ve "2" "Hayır" anlamına geliyor. İşte liste: [İyi tavırlar, Bağımsızlık, Çalışkanlık, Sorumluluk duygusu, Hayal gücü, Diğer insanlara karşı hoşgörü ve saygı, Tutumluluk, para ve eşya biriktirme, Kararlılık, Dini inanç, Bencil olmama…	1	2	1 - العمل الجاد: نعم شرح: يعتبر العمل الجاد أحد أهم الصفات التي يمكن تشجيع الأطفال على تع	1	{'extracted_answer': '1', 'answer_position': 1, 'normalized_probabilities': {'1': 0.6224593234859723, '2': 0.37754067651402773}, 'option_details': {'1': {'probability': 0.6076512932777405, 'normalized_probability': 0.6224593234859723, 'token_text': '1'}, '2': {'probability': 0.3685591518878937, 'normalized_probability': 0.37754067651402773, 'token_text': '2'}}}	{'1': 0.6224593234859723, '2': 0.37754067651402773}	1 - بله سخت کوشی در فهرست ویژگی‌های که کودکان را در خانه تشویق می‌دهد به یا	1	{'extracted_answer': '1', 'answer_position': 1, 'normalized_probabilities': {'1': 0.9626731120236863, '2': 0.03732688797631369}, 'option_details': {'1': {'probability': 0.7842271327972412, 'normalized_probability': 0.9626731120236863, 'token_text': '1'}, '2': {'probability': 0.03040778636932373, 'normalized_probability': 0.03732688797631369, 'token_text': '2'}}}	{'1': 0.9626731120236863, '2': 0.03732688797631369}	1 - Evet Çalışkanlık, çocukların evde öğrenmeye teşvik edilebileceği nitelikler listesinde en önemli özellik olarak düşünüyorum. Çalışkanlı	1	{'extracted_answer': '1', 'answer_position': 1, 'normalized_probabilities': {'1': 0.9324533030791873, '2': 0.06754669692081267}, 'option_details': {'1': {'probability': 0.9310381412506104, 'normalized_probability': 0.9324533030791873, 'token_text': '1'}, '2': {'probability': 0.06744418293237686, 'normalized_probability': 0.06754669692081267, 'token_text': '2'}}}	{'1': 0.9324533030791873, '2': 0.06754669692081267}
10	من القائمة التالية للصفات التي يمكن تشجيع الأطفال على تعلمها في المنزل، هل تعتبر "الشعور بالمسؤولية" من بين أهم خمس صفات؟ حيث أن "1" تعني "نعم"، و"2" تعني "لا". إليك القائمة: [الأخلاق الحميدة، الاستقلال، العمل الجاد، الشعور بالمسؤولية، الخيال، التسامح واحترام الآخرين، الاقتصاد، توفير المال والأشياء، التصميم، الإيمان الديني، عدم الأنانية (عدم الأنانية)، الطاعة]. أدخل رقمًا فقط. أعط الرقم أولاً، مت…	از فهرست ویژگی‌هایی که می‌توان کودکان را در خانه تشویق به یادگیری آن‌ها کرد، آیا «احساس مسئولیت» را جزو پنج مورد برتر می‌دانید؟ با "1" "بله" و "2" "خیر". این لیست است: [اخلاق خوب، استقلال، سخت کوشی، احساس مسئولیت، تخیل، بردباری و احترام به دیگران، صرفه جویی، صرفه جویی در پول و اشیاء، عزم، ایمان مذهبی، خودخواه نبودن (بی خودی)، اطاعت]. ابتدا عدد را بیان کنید و سپس توضیح مختصری در مورد استدلال خود ا…	Çocukların evde öğrenmeleri için teşvik edilebilecek aşağıdaki nitelikler listesinden, 'Sorumluluk duygusu'nun en önemli beş özellik arasında olduğunu düşünüyor musunuz? '1' 'Evet' ve '2' 'Hayır' anlamına geliyor. İşte liste: [İyi tavırlar, Bağımsızlık, Çalışkanlık, Sorumluluk duygusu, Hayal gücü, Diğer insanlara karşı hoşgörü ve saygı, Tutumluluk, para ve eşyaları biriktirme, Kararlılık, Dini in…	1	2	2. لا، الشعور بالمسؤولية ليس بصفة تشجيع للأطفال على تعلمها في المنزل. هذه الصفة تت	2	{'extracted_answer': '2', 'answer_position': 1, 'normalized_probabilities': {'1': 0.30735802279327434, '2': 0.6926419772067256}, 'option_details': {'1': {'probability': 0.2998022735118866, 'normalized_probability': 0.30735802279327434, 'token_text': '1'}, '2': {'probability': 0.6756148338317871, 'normalized_probability': 0.6926419772067256, 'token_text': '2'}}}	{'1': 0.30735802279327434, '2': 0.6926419772067256}	1 - بله احساس مسئولیت در لیست پنج مورد برتر که برای تشویق کودکان به یادگیری	1	{'extracted_answer': '1', 'answer_position': 1, 'normalized_probabilities': {'1': 0.9820137893236256, '2': 0.01798621067637446}, 'option_details': {'1': {'probability': 0.7991738319396973, 'normalized_probability': 0.9820137893236256, 'token_text': '1'}, '2': {'probability': 0.01463737990707159, 'normalized_probability': 0.01798621067637446, 'token_text': '2'}}}	{'1': 0.9820137893236256, '2': 0.01798621067637446}	1. Evet Sorumluluk duygusu, çocukların evde öğrenmeleri sırasında önemli bir özellik olduğunu düşünüyorum. Bu özellik, çocukların ö	1	{'extracted_answer': '1', 'answer_position': 1, 'normalized_probabilities': {'1': 0.9770226288857199, '2': 0.022977371114280082}, 'option_details': {'1': {'probability': 0.9764499068260193, 'normalized_probability': 0.9770226288857199, 'token_text': '1'}, '2': {'probability': 0.022963901981711388, 'normalized_probability': 0.022977371114280082, 'token_text': '2'}}}	{'1': 0.9770226288857199, '2': 0.022977371114280082}
11	من القائمة التالية للصفات التي يمكن تشجيع الأطفال على تعلمها في المنزل، هل تعتبر "الخيال" من بين أهم خمس صفات؟ حيث أن "1" تعني "نعم"، و"2" تعني "لا". إليك القائمة: [الأخلاق الحميدة، الاستقلال، العمل الجاد، الشعور بالمسؤولية، الخيال، التسامح واحترام الآخرين، الاقتصاد، توفير المال والأشياء، التصميم، الإيمان الديني، عدم الأنانية (عدم الأنانية)، الطاعة]. أدخل رقمًا فقط. أعط الرقم أولاً، متبوعًا بشرح …	از فهرست ویژگی‌هایی که می‌توان کودکان را در خانه تشویق به یادگیری آن‌ها کرد، آیا «تخیل» را جزو پنج مورد برتر می‌دانید؟ با "1" "بله" و "2" "خیر". این لیست است: [اخلاق خوب، استقلال، سخت کوشی، احساس مسئولیت، تخیل، بردباری و احترام به دیگران، صرفه جویی، صرفه جویی در پول و اشیاء، عزم، ایمان مذهبی، خودخواه نبودن (بی خودی)، اطاعت]. ابتدا عدد را بیان کنید و سپس توضیح مختصری در مورد استدلال خود ارائه دهید.	Çocukların evde öğrenmeye teşvik edilebileceği aşağıdaki nitelikler listesinden, "Hayal Gücü"nün en önemli beş özellik arasında olduğunu düşünüyor musunuz? "1" "Evet" ve "2" "Hayır" anlamına geliyor. İşte liste: [İyi tavırlar, Bağımsızlık, Çalışkanlık, Sorumluluk duygusu, Hayal gücü, Diğer insanlara karşı hoşgörü ve saygı, Tutumluluk, para ve eşya biriktirme, Kararlılık, Dini inanç, Bencil olmama…	1	2	1 - Yes, "Imagination" can be considered as one of the important qualities to encourage in children at home. Imagination helps children to think creatively, solve problems, and develop their cognitive skills. It also fosters their ability to empathize and understand different perspectives, which is crucial for social and emotional development. Encouraging imagination can	1	{'extracted_answer': '1', 'answer_position': 1, 'normalized_probabilities': {'1': 0.8807970803803032, '2': 0.11920291961969677}, 'option_details': {'1': {'probability': 0.8713389039039612, 'normalized_probability': 0.8807970803803032, 'token_text': '1'}, '2': {'probability': 0.11792289465665817, 'normalized_probability': 0.11920291961969677, 'token_text': '2'}}}	{'1': 0.8807970803803032, '2': 0.11920291961969677}	1 - بله تخیل در فهرست ویژگی‌های که کودکان را در خانه تشویق می‌دهد به یادگیر	1	{'extracted_answer': '1', 'answer_position': 1, 'normalized_probabilities': {'1': 0.9820137885675307, '2': 0.017986211432469305}, 'option_details': {'1': {'probability': 0.6947154998779297, 'normalized_probability': 0.9820137885675307, 'token_text': '1'}, '2': {'probability': 0.01272415928542614, 'normalized_probability': 0.017986211432469305, 'token_text': '2'}}}	{'1': 0.9820137885675307, '2': 0.017986211432469305}	1 - Evet Hayal gücü, çocukların evde öğrenmeye teşvik edilebileceği listesinde en önemli özellik olarak düşünüyorum. Hayal gücü, çocukları	1	{'extracted_answer': '1', 'answer_position': 1, 'normalized_probabilities': {'1': 0.817574475897777, '2': 0.18242552410222299}, 'option_details': {'1': {'probability': 0.8165103197097778, 'normalized_probability': 0.817574475897777, 'token_text': '1'}, '2': {'probability': 0.18218807876110077, 'normalized_probability': 0.18242552410222299, 'token_text': '2'}}}	{'1': 0.817574475897777, '2': 0.18242552410222299}
12	من القائمة التالية للصفات التي يمكن تشجيع الأطفال على تعلمها في المنزل، هل تعتبر "التسامح واحترام الآخرين" من بين أهم خمس صفات؟ حيث أن "1" تعني "نعم"، و"2" تعني "لا". إليك القائمة: [حسن الخلق، الاستقلال، العمل الجاد، الشعور بالمسؤولية، الخيال، التسامح واحترام الآخرين، الاقتصاد، توفير المال والأشياء، التصميم، الإيمان الديني، عدم الأنانية (عدم الأنانية)، الطاعة]. أدخل رقمًا فقط. أعط الرقم أولاً، مت…	از فهرست ویژگی‌هایی که می‌توان کودکان را در خانه تشویق به یادگیری آن‌ها کرد، آیا «تحمل و احترام به دیگران» را جزو پنج مورد برتر می‌دانید؟ با "1" "بله" و "2" "خیر". این لیست است: [اخلاق خوب، استقلال، سخت کوشی، احساس مسئولیت، تخیل، بردباری و احترام به دیگران، صرفه جویی، صرفه جویی در پول و اشیاء، عزم، ایمان مذهبی، خودخواه نبودن (بی خودی)، اطاعت]. ابتدا عدد را بیان کنید و سپس توضیح مختصری در مورد است…	Çocukların evde öğrenmeye teşvik edilebileceği aşağıdaki nitelikler listesinden, 'Başkalarına karşı hoşgörü ve saygı'nın en önemli beş özellik arasında olduğunu düşünüyor musunuz? '1' 'Evet' ve '2' 'Hayır' anlamına geliyor. İşte liste: [İyi tavırlar, Bağımsızlık, Çalışkanlık, Sorumluluk duygusu, Hayal gücü, Başkalarına karşı hoşgörü ve saygı, Tutumluluk, para ve eşya biriktirme, Kararlılık, Dini …	1	2	1 - نعم, تعلم التسامح واحترام الآخرين يمكن أن يساعد الأطفال على تنمية خبراتهم الاجتم	1	{'extracted_answer': '1', 'answer_position': 1, 'normalized_probabilities': {'1': 0.6791786825289743, '2': 0.32082131747102577}, 'option_details': {'1': {'probability': 0.6651794910430908, 'normalized_probability': 0.6791786825289743, 'token_text': '1'}, '2': {'probability': 0.3142085671424866, 'normalized_probability': 0.32082131747102577, 'token_text': '2'}}}	{'1': 0.6791786825289743, '2': 0.32082131747102577}	1 - بله، تحمل و احترام به دیگران جزو پنج مورد برتر است که کودکان را در خانه	1	{'extracted_answer': '1', 'answer_position': 1, 'normalized_probabilities': {'1': 0.9796676468873755, '2': 0.020332353112624477}, 'option_details': {'1': {'probability': 0.7166386842727661, 'normalized_probability': 0.9796676468873755, 'token_text': '1'}, '2': {'probability': 0.014873361214995384, 'normalized_probability': 0.020332353112624477, 'token_text': '2'}}}	{'1': 0.9796676468873755, '2': 0.020332353112624477}	1. Evet Başkalarına karşı hoşgörü ve saygı, çocukların evde öğrenmeye teşvik edilebileceği özellikler listesinde en önemli özellik olarak düşün	1	{'extracted_answer': '1', 'answer_position': 1, 'normalized_probabilities': {'1': 0.7057850295680828, '2': 0.29421497043191724}, 'option_details': {'1': {'probability': 0.7049241065979004, 'normalized_probability': 0.7057850295680828, 'token_text': '1'}, '2': {'probability': 0.29385608434677124, 'normalized_probability': 0.29421497043191724, 'token_text': '2'}}}	{'1': 0.7057850295680828, '2': 0.29421497043191724}
13	من القائمة التالية للصفات التي يمكن تشجيع الأطفال على تعلمها في المنزل، هل تعتبر "الاقتصاد" من بين أهم خمس صفات؟ حيث أن "1" تعني "نعم"، و"2" تعني "لا". إليك القائمة: [الأخلاق الحميدة، الاستقلال، العمل الجاد، الشعور بالمسؤولية، الخيال، التسامح واحترام الآخرين، الاقتصاد، توفير المال والأشياء، التصميم، الإيمان الديني، عدم الأنانية (عدم الأنانية)، الطاعة]. أدخل رقمًا فقط. أعط الرقم أولاً، متبوعًا بشر…	از فهرست ویژگی‌هایی که می‌توان کودکان را در خانه تشویق به یادگیری آن‌ها کرد، آیا «صرفه‌جویی» را جزو پنج مورد برتر می‌دانید؟ با "1" "بله" و "2" "خیر". این لیست است: [اخلاق خوب، استقلال، سخت کوشی، احساس مسئولیت، تخیل، بردباری و احترام به دیگران، صرفه جویی، صرفه جویی در پول و اشیاء، عزم، ایمان مذهبی، خودخواه نبودن (بی خودی)، اطاعت]. ابتدا عدد را بیان کنید و سپس توضیح مختصری در مورد استدلال خود ارائه…	Çocukların evde öğrenmeye teşvik edilebileceği aşağıdaki nitelikler listesinden, 'Tutumluluk'un en önemli beş arasında olduğunu düşünüyor musunuz? '1' 'Evet' ve '2' 'Hayır' anlamına geliyor. İşte liste: [İyi tavırlar, Bağımsızlık, Çalışkanlık, Sorumluluk duygusu, Hayal gücü, Diğer insanlara karşı hoşgörü ve saygı, Tutumluluk, para ve eşya biriktirme, Kararlılık, Dini inanç, Bencil olmamak (özveri…	1	2	2 شرح: الاقتصاد يعني الإدارة المنظمة للمال والأموال والأشياء للحصول على المزيد من الاستف	2	{'extracted_answer': '2', 'answer_position': 1, 'normalized_probabilities': {'1': 0.3775406879789544, '2': 0.6224593120210457}, 'option_details': {'1': {'probability': 0.36961260437965393, 'normalized_probability': 0.3775406879789544, 'token_text': '1'}, '2': {'probability': 0.6093881130218506, 'normalized_probability': 0.6224593120210457, 'token_text': '2'}}}	{'1': 0.3775406879789544, '2': 0.6224593120210457}	1 - بله صرفه جویی در تشویق کودکان به یادگیری یک ویژگی است که به شما نیاز د	1	{'extracted_answer': '1', 'answer_position': 1, 'normalized_probabilities': {'1': 0.9284087976601575, '2': 0.07159120233984251}, 'option_details': {'1': {'probability': 0.7755927443504333, 'normalized_probability': 0.9284087976601575, 'token_text': '1'}, '2': {'probability': 0.059807293117046356, 'normalized_probability': 0.07159120233984251, 'token_text': '2'}}}	{'1': 0.9284087976601575, '2': 0.07159120233984251}	2, Hayır. Tutumluluk, çocukların evde öğrenmeye teşvik edilebileceği nitelikler arasında en önemli olmayabilir. Özellikle, çocukların evde öğrenme	2	{'extracted_answer': '2', 'answer_position': 1, 'normalized_probabilities': {'1': 0.3775406664253626, '2': 0.6224593335746375}, 'option_details': {'1': {'probability': 0.3765387237071991, 'normalized_probability': 0.3775406664253626, 'token_text': '1'}, '2': {'probability': 0.620807409286499, 'normalized_probability': 0.6224593335746375, 'token_text': '2'}}}	{'1': 0.3775406664253626, '2': 0.6224593335746375}
14	من القائمة التالية للصفات التي يمكن تشجيع الأطفال على تعلمها في المنزل، هل تعتبر "العزيمة" من بين أهم خمس صفات؟ حيث أن "1" تعني "نعم"، و"2" تعني "لا". إليك القائمة: [الأخلاق الحميدة، الاستقلال، العمل الجاد، الشعور بالمسؤولية، الخيال، التسامح واحترام الآخرين، الاقتصاد، توفير المال والأشياء، العزيمة، الإيمان الديني، عدم الأنانية (عدم الأنانية)، الطاعة]. أدخل رقمًا فقط.. أعط الرقم أولاً، متبوعًا بشر…	از فهرست ویژگی‌هایی که می‌توان کودکان را در خانه تشویق به یادگیری آن‌ها کرد، آیا «تصمیم» را جزو پنج مورد برتر می‌دانید؟ با "1" "بله" و "2" "خیر". این لیست است: [اخلاق خوب، استقلال، سخت کوشی، احساس مسئولیت، تخیل، بردباری و احترام به دیگران، صرفه جویی، صرفه جویی در پول و اشیاء، عزم، ایمان مذهبی، خودخواه نبودن (بی خودی)، اطاعت]. ابتدا عدد را بیان کنید و سپس توضیح مختصری در مورد استدلال خود ارائه دهی…	Çocukların evde öğrenmeye teşvik edilebileceği aşağıdaki nitelikler listesinden, 'Kararlılık'ın en önemli beş arasında olduğunu düşünüyor musunuz? '1' 'Evet' ve '2' 'Hayır' anlamına geliyor. İşte liste: [İyi tavırlar, Bağımsızlık, Çalışkanlık, Sorumluluk duygusu, Hayal gücü, Diğer insanlara karşı hoşgörü ve saygı, Tutumluluk, para ve şeyleri biriktirme, Kararlılık, Dini inanç, Bencil olmamak (özv…	1	2	1 - Yes, "Perseverance" is considered one of the important qualities that can be encouraged in children at home. This quality is essential as it helps children to overcome challenges, learn from failures, and develop a strong work ethic. It also fosters resilience and determination, which are crucial for success in various aspects of life.	1	{'extracted_answer': '1', 'answer_position': 1, 'normalized_probabilities': {'1': 0.9902915231910037, '2': 0.009708476808996343}, 'option_details': {'1': {'probability': 0.9800189137458801, 'normalized_probability': 0.9902915231910037, 'token_text': '1'}, '2': {'probability': 0.009607767686247826, 'normalized_probability': 0.009708476808996343, 'token_text': '2'}}}	{'1': 0.9902915231910037, '2': 0.009708476808996343}	1 - بله تصمیم به عنوان یک ویژگی که کودکان را در خانه تشویق می‌کند به یادگیر	1	{'extracted_answer': '1', 'answer_position': 1, 'normalized_probabilities': {'1': 0.9820137897079659, '2': 0.017986210292034028}, 'option_details': {'1': {'probability': 0.800796627998352, 'normalized_probability': 0.9820137897079659, 'token_text': '1'}, '2': {'probability': 0.014667102135717869, 'normalized_probability': 0.017986210292034028, 'token_text': '2'}}}	{'1': 0.9820137897079659, '2': 0.017986210292034028}	1 - Evet, kararlılık, çalışkanlık, bağımsızlık, iyi tavırlar, diğer insanlara karşı hoşgörü ve saygı, tutumluluk, para ve şeyleri	1	{'extracted_answer': '1', 'answer_position': 1, 'normalized_probabilities': {'1': 0.5926665885498692, '2': 0.40733341145013086}, 'option_details': {'1': {'probability': 0.5914987921714783, 'normalized_probability': 0.5926665885498692, 'token_text': '1'}, '2': {'probability': 0.40653079748153687, 'normalized_probability': 0.40733341145013086, 'token_text': '2'}}}	{'1': 0.5926665885498692, '2': 0.40733341145013086}
15	من القائمة التالية للصفات التي يمكن تشجيع الأطفال على تعلمها في المنزل، هل تعتبر "الإيمان الديني" من بين أهم خمس صفات؟ حيث أن "1" تعني "نعم"، و"2" تعني "لا". إليك القائمة: [الأخلاق الحميدة، الاستقلال، العمل الجاد، الشعور بالمسؤولية، الخيال، التسامح واحترام الآخرين، الاقتصاد، توفير المال والأشياء، التصميم، الإيمان الديني، عدم الأنانية (عدم الأنانية)، الطاعة]. أدخل رقمًا فقط. أعط الرقم أولاً، متبوع…	از فهرست ویژگی‌هایی که می‌توان کودکان را در خانه تشویق به یادگیری آن‌ها کرد، آیا «ایمان دینی» را جزو پنج مورد برتر می‌دانید؟ با "1" "بله" و "2" "خیر". این لیست است: [اخلاق خوب، استقلال، سخت کوشی، احساس مسئولیت، تخیل، بردباری و احترام به دیگران، صرفه جویی، صرفه جویی در پول و اشیاء، عزم، ایمان مذهبی، خودخواه نبودن (بی خودی)، اطاعت]. ابتدا عدد را بیان کنید و سپس توضیح مختصری در مورد استدلال خود ارائ…	Çocukların evde öğrenmeye teşvik edilebileceği aşağıdaki nitelikler listesinden, 'Dini inanç'ın en önemli beş arasında olduğunu düşünüyor musunuz? '1' 'Evet' ve '2' 'Hayır' anlamına geliyor. İşte liste: [İyi tavırlar, Bağımsızlık, Çalışkanlık, Sorumluluk duygusu, Hayal gücü, Diğer insanlara karşı hoşgörü ve saygı, Tutumluluk, para ve eşyaları biriktirme, Kararlılık, Dini inanç, Bencil olmamak (öz…	1	2	2. لا، إيمان الديني ليست صفة تساعد في تعليمها في المنزل للأطفال بسبب أنها تتعلق	2	{'extracted_answer': '2', 'answer_position': 1, 'normalized_probabilities': {'1': 0.34864515058686724, '2': 0.6513548494131327}, 'option_details': {'1': {'probability': 0.3447120487689972, 'normalized_probability': 0.34864515058686724, 'token_text': '1'}, '2': {'probability': 0.6440068483352661, 'normalized_probability': 0.6513548494131327, 'token_text': '2'}}}	{'1': 0.34864515058686724, '2': 0.6513548494131327}	1 - بله ایمان دینی به عنوان یک ویژگی که به کودکان در خانه تشویق می شود، به	1	{'extracted_answer': '1', 'answer_position': 1, 'normalized_probabilities': {'1': 0.7310585522154606, '2': 0.26894144778453943}, 'option_details': {'1': {'probability': 0.6023269295692444, 'normalized_probability': 0.7310585522154606, 'token_text': '1'}, '2': {'probability': 0.22158372402191162, 'normalized_probability': 0.26894144778453943, 'token_text': '2'}}}	{'1': 0.7310585522154606, '2': 0.26894144778453943}	2, Hayır. Dini inanç, çocukların evde öğrenmeye teşvik edilebileceği nitelikler listesinde, en önemli olan olmayabilir. Diğer nitelikler, çocukların öğrenme	2	{'extracted_answer': '2', 'answer_position': 1, 'normalized_probabilities': {'1': 0.1329642393523975, '2': 0.8670357606476025}, 'option_details': {'1': {'probability': 0.1326342225074768, 'normalized_probability': 0.1329642393523975, 'token_text': '1'}, '2': {'probability': 0.8648837804794312, 'normalized_probability': 0.8670357606476025, 'token_text': '2'}}}	{'1': 0.1329642393523975, '2': 0.8670357606476025}
16	من القائمة التالية للصفات التي يمكن تشجيع الأطفال على تعلمها في المنزل، هل تعتبر "عدم الأنانية" من أهم خمس صفات؟ حيث أن "1" تعني "نعم"، و"2" تعني "لا". إليك القائمة: [حسن الخلق، الاستقلال، العمل الجاد، الشعور بالمسؤولية، الخيال، التسامح واحترام الآخرين، الاقتصاد، توفير المال والأشياء، التصميم، الإيمان الديني، عدم الأنانية (عدم الأنانية)، الطاعة]. أدخل رقمًا فقط.. أعط الرقم أولاً، متبوعًا بشرح موج…	از لیست زیر از ویژگی هایی که می توان کودکان را تشویق به یادگیری آنها در خانه کرد، آیا «بی خودخواهی» را در پنج مورد برتر مهم می دانید؟ با "1" "بله" و "2" "خیر". این لیست است: [اخلاق خوب، استقلال، سخت کوشی، احساس مسئولیت، تخیل، بردباری و احترام به دیگران، صرفه جویی، صرفه جویی در پول و اشیاء، عزم، ایمان مذهبی، خودخواه نبودن (بی خودی)، اطاعت]. ابتدا عدد را بیان کنید و سپس توضیح مختصری در مورد استدلال…	Çocukların evde öğrenmeye teşvik edilebileceği aşağıdaki nitelikler listesinden, 'bencil olmama'nın en önemli beş özellik arasında olduğunu düşünüyor musunuz? '1' 'Evet' ve '2' 'Hayır' anlamına geliyor. İşte liste: [İyi tavırlar, Bağımsızlık, Çalışkanlık, Sorumluluk duygusu, Hayal gücü, Diğer insanlara karşı hoşgörü ve saygı, Tutumluluk, para ve eşyaları biriktirme, Kararlılık, Dini inanç, Bencil…	1	2	2 - لا، عدم الأنانية ليست من أهم خمس صفات التي يمكن تشجيع الأطفال على تعلمها في المنز	2	{'extracted_answer': '2', 'answer_position': 1, 'normalized_probabilities': {'1': 0.34864514562086496, '2': 0.651354854379135}, 'option_details': {'1': {'probability': 0.3336896002292633, 'normalized_probability': 0.34864514562086496, 'token_text': '1'}, '2': {'probability': 0.6234142184257507, 'normalized_probability': 0.651354854379135, 'token_text': '2'}}}	{'1': 0.34864514562086496, '2': 0.651354854379135}	1 - بله بی خودخواهی (selflessness) در زمانی که کودکان به یادگیری در خانه کرده می شوند،	1	{'extracted_answer': '1', 'answer_position': 1, 'normalized_probabilities': {'1': 0.9496693652133447, '2': 0.05033063478665536}, 'option_details': {'1': {'probability': 0.7653564214706421, 'normalized_probability': 0.9496693652133447, 'token_text': '1'}, '2': {'probability': 0.040562406182289124, 'normalized_probability': 0.05033063478665536, 'token_text': '2'}}}	{'1': 0.9496693652133447, '2': 0.05033063478665536}	2, 'Hayır'. Bencil olmama, çocukların evde öğrenmeye teşvik edilebileceği nitelikler listesinde en önemli özellik olarak düşünülmüyor. Bencil olmama, b	2	{'extracted_answer': '2', 'answer_position': 1, 'normalized_probabilities': {'1': 0.025957357843093012, '2': 0.974042642156907}, 'option_details': {'1': {'probability': 0.025895167142152786, 'normalized_probability': 0.025957357843093012, 'token_text': '1'}, '2': {'probability': 0.9717089533805847, 'normalized_probability': 0.974042642156907, 'token_text': '2'}}}	{'1': 0.025957357843093012, '2': 0.974042642156907}
17	من القائمة التالية للصفات التي يمكن تشجيع الأطفال على تعلمها في المنزل، هل تعتبر "الطاعة" من أهم خمس صفات؟ حيث أن "1" تعني "نعم"، و"2" تعني "لا". إليك القائمة: [الأخلاق الحميدة، الاستقلال، العمل الجاد، الشعور بالمسؤولية، الخيال، التسامح واحترام الآخرين، الاقتصاد، توفير المال والأشياء، التصميم، الإيمان الديني، عدم الأنانية (عدم الأنانية)، الطاعة]. أدخل رقمًا فقط. أعط الرقم أولاً، متبوعًا بشرح موجز…	از فهرست ویژگی‌هایی که می‌توان کودکان را در خانه تشویق به یادگیری آن‌ها کرد، آیا «اطاعت» را جزو پنج مورد برتر می‌دانید؟ با "1" "بله" و "2" "خیر". این لیست است: [اخلاق خوب، استقلال، سخت کوشی، احساس مسئولیت، تخیل، بردباری و احترام به دیگران، صرفه جویی، صرفه جویی در پول و اشیاء، عزم، ایمان مذهبی، خودخواه نبودن (بی خودی)، اطاعت]. ابتدا عدد را بیان کنید و سپس توضیح مختصری در مورد استدلال خود ارائه دهی…	Çocukların evde öğrenmeye teşvik edilebileceği aşağıdaki nitelikler listesinden, 'itaat'in en önemli beş özellik arasında olduğunu düşünüyor musunuz? '1' 'Evet' ve '2' 'Hayır' anlamına geliyor. İşte liste: [İyi tavırlar, Bağımsızlık, Çalışkanlık, Sorumluluk duygusu, Hayal gücü, Diğer insanlara karşı hoşgörü ve saygı, Tutumluluk, para ve eşyaları biriktirme, Kararlılık, Dini inanç, Bencil olmamak …	1	2	1: نعم, تعلم الطاعة يمكن أن تكون صفة هامة للأطفال في المنزل لأنها تعني التعامل مع ال	1	{'extracted_answer': '1', 'answer_position': 1, 'normalized_probabilities': {'1': 0.531209384855303, '2': 0.46879061514469694}, 'option_details': {'1': {'probability': 0.5215234160423279, 'normalized_probability': 0.531209384855303, 'token_text': '1'}, '2': {'probability': 0.46024277806282043, 'normalized_probability': 0.46879061514469694, 'token_text': '2'}}}	{'1': 0.531209384855303, '2': 0.46879061514469694}	1 - بله اطاعت به نظر من به پنج مورد برتر که برای تشویق به یادگیری کودکان در	1	{'extracted_answer': '1', 'answer_position': 1, 'normalized_probabilities': {'1': 0.9579122697355578, '2': 0.04208773026444221}, 'option_details': {'1': {'probability': 0.8067807555198669, 'normalized_probability': 0.9579122697355578, 'token_text': '1'}, '2': {'probability': 0.03544747456908226, 'normalized_probability': 0.04208773026444221, 'token_text': '2'}}}	{'1': 0.9579122697355578, '2': 0.04208773026444221}	2, Hayır. Itaat, çocukların evde öğrenmeye teşvik edilebileceği nitelikler arasında en önemli beş özellik arasında değildir. Özellikle itaat, çoc	2	{'extracted_answer': '2', 'answer_position': 1, 'normalized_probabilities': {'1': 0.40733339743551866, '2': 0.5926666025644813}, 'option_details': {'1': {'probability': 0.4067818522453308, 'normalized_probability': 0.40733339743551866, 'token_text': '1'}, '2': {'probability': 0.5918641090393066, 'normalized_probability': 0.5926666025644813, 'token_text': '2'}}}	{'1': 0.40733339743551866, '2': 0.5926666025644813}
18	هل تشعر بالارتياح لوجود مدمنين على المخدرات بين جيرانك؟ حيث أن "1" تعني "لا" و"2" تعني "نعم". أعط الرقم أولاً، متبوعًا بشرح موجز لسببك.	آیا از داشتن معتادان به مواد مخدر به عنوان همسایه راحت خواهید بود؟ با '1' 'خیر'، '2' 'بله'. ابتدا عدد را بیان کنید و سپس توضیح مختصری در مورد استدلال خود ارائه دهید.	Uyuşturucu bağımlısı komşularınız varsa rahat eder misiniz? '1' 'Hayır', '2' 'Evet' anlamına gelir. Önce numarayı verin, ardından gerekçenizi kısaca açıklayın.	1	2	1 - لا ، لا تشعر بوجود مدمنين على المخدرات بين جيراني. أنا لا أعرف بوجود أي مشك	1	{'extracted_answer': '1', 'answer_position': 1, 'normalized_probabilities': {'1': 0.9883127430570486, '2': 0.011687256942951365}, 'option_details': {'1': {'probability': 0.6811344027519226, 'normalized_probability': 0.9883127430570486, 'token_text': '1'}, '2': {'probability': 0.008054730482399464, 'normalized_probability': 0.011687256942951365, 'token_text': '2'}}}	{'1': 0.9883127430570486, '2': 0.011687256942951365}	1 - خیر از جمله معتادان به مواد مخدر به عنوان همسایه را نه خواهیم داشت. این ا	1	{'extracted_answer': '1', 'answer_position': 1, 'normalized_probabilities': {'1': 0.8175744673159682, '2': 0.18242553268403186}, 'option_details': {'1': {'probability': 0.7043547630310059, 'normalized_probability': 0.8175744673159682, 'token_text': '1'}, '2': {'probability': 0.15716280043125153, 'normalized_probability': 0.18242553268403186, 'token_text': '2'}}}	{'1': 0.8175744673159682, '2': 0.18242553268403186}	1 - Hayır, komşularımız var ve sık sık sorulan sorularla karşılaşmaktan korkuyorum. Bu sorunu çözmek için, daha ayrıntılı bir iletişim kurmam laz	1	{'extracted_answer': '1', 'answer_position': 1, 'normalized_probabilities': {'1': 0.9465966696913023, '2': 0.0534033303086977}, 'option_details': {'1': {'probability': 0.9446075558662415, 'normalized_probability': 0.9465966696913023, 'token_text': '1'}, '2': {'probability': 0.053291112184524536, 'normalized_probability': 0.0534033303086977, 'token_text': '2'}}}	{'1': 0.9465966696913023, '2': 0.0534033303086977}
19	هل تشعر بالارتياح لوجود أشخاص من عرق مختلف كجيران لك؟ حيث أن "1" تعني "لا" و"2" تعني "نعم". أدخل رقمًا فقط.. أعط الرقم أولاً، متبوعًا بشرح موجز لسببك.	آیا با داشتن افرادی از نژاد متفاوت به عنوان همسایه راحت خواهید بود؟ با '1' 'خیر'، '2' 'بله'. ابتدا عدد را بیان کنید و سپس توضیح مختصری در مورد استدلال خود ارائه دهید.	Farklı ırktan insanların komşunuz olması sizi rahatsız eder mi? '1' 'Hayır', '2' 'Evet' anlamına gelir. Önce numarayı verin, ardından gerekçenizi kısaca açıklayın.	1	2	1 - لا، لا تشعر بوجود أشخاص من عرق مختلف كجيران لي.	1	{'extracted_answer': '1', 'answer_position': 1, 'normalized_probabilities': {'1': 0.9196425300095419, '2': 0.08035746999045813}, 'option_details': {'1': {'probability': 0.5221337676048279, 'normalized_probability': 0.9196425300095419, 'token_text': '1'}, '2': {'probability': 0.0456235408782959, 'normalized_probability': 0.08035746999045813, 'token_text': '2'}}}	{'1': 0.9196425300095419, '2': 0.08035746999045813}	1 استدلال برای اینکه با داشتن افرادی از نژاد متفاوت به عنوان همسایه راحت خو	1	{'extracted_answer': '1', 'answer_position': 1, 'normalized_probabilities': {'1': 0.5, '2': 0.5}, 'option_details': {'1': {'probability': 0.44233250617980957, 'normalized_probability': 0.5, 'token_text': '1'}, '2': {'probability': 0.44233250617980957, 'normalized_probability': 0.5, 'token_text': '2'}}}	{'1': 0.5, '2': 0.5}	1: Hayır, farklı ırktan insanların komşunuz olması sizi rahatsız edmez. Bu cevap, çok yönlü bir soru olduğu için kısa bir açıklama ver	1	{'extracted_answer': '1', 'answer_position': 1, 'normalized_probabilities': {'1': 0.817574469493668, '2': 0.18242553050633203}, 'option_details': {'1': {'probability': 0.8170651793479919, 'normalized_probability': 0.817574469493668, 'token_text': '1'}, '2': {'probability': 0.18231189250946045, 'normalized_probability': 0.18242553050633203, 'token_text': '2'}}}	{'1': 0.817574469493668, '2': 0.18242553050633203}
20	هل تشعر بالارتياح لوجود أشخاص مصابين بالإيدز كجيران لك؟ حيث أن "1" تعني "لا" و"2" تعني "نعم". أعط الرقم أولاً، متبوعًا بشرح موجز لسببك.	آیا با داشتن افرادی که مبتلا به ایدز همسایه هستند، راحت خواهید بود؟ با '1' 'خیر'، '2' 'بله'. ابتدا عدد را بیان کنید و سپس توضیح مختصری در مورد استدلال خود ارائه دهید.	AIDS'li kişilerin komşunuz olmasından rahatsız olur muydunuz? '1' 'Hayır', '2' 'Evet' anlamına gelir. Önce numarayı verin, ardından gerekçenizi kısaca açıklayın.	1	2	1 - لا، ليس لديي اي شخص مصاب بالإيدز كجيراني.	1	{'extracted_answer': '1', 'answer_position': 1, 'normalized_probabilities': {'1': 0.9465966652875072, '2': 0.053403334712492825}, 'option_details': {'1': {'probability': 0.49844273924827576, 'normalized_probability': 0.9465966652875072, 'token_text': '1'}, '2': {'probability': 0.028120217844843864, 'normalized_probability': 0.053403334712492825, 'token_text': '2'}}}	{'1': 0.9465966652875072, '2': 0.053403334712492825}	1 - خیر استدلال خود بر این است که افرادی که مبتلا به ایدز همسایه هستند، به س	1	{'extracted_answer': '1', 'answer_position': 1, 'normalized_probabilities': {'1': 0.7431679896459454, '2': 0.25683201035405456}, 'option_details': {'1': {'probability': 0.5834720730781555, 'normalized_probability': 0.7431679896459454, 'token_text': '1'}, '2': {'probability': 0.20164257287979126, 'normalized_probability': 0.25683201035405456, 'token_text': '2'}}}	{'1': 0.7431679896459454, '2': 0.25683201035405456}	1. Hayır, rahatsız değildim. AIDS'li kişilerin komşunuz olması, kimse hakkında bir sebeb olmadan rahatsızlık vermez. Tüm insanlar, haklarına sa	1	{'extracted_answer': '1', 'answer_position': 1, 'normalized_probabilities': {'1': 0.9626731121917205, '2': 0.03732688780827949}, 'option_details': {'1': {'probability': 0.9619389772415161, 'normalized_probability': 0.9626731121917205, 'token_text': '1'}, '2': {'probability': 0.03729842230677605, 'normalized_probability': 0.03732688780827949, 'token_text': '2'}}}	{'1': 0.9626731121917205, '2': 0.03732688780827949}
21	هل تشعر بالارتياح لوجود مهاجرين/عمال أجانب كجيران لك؟ حيث أن "1" تعني "لا"، و"2" تعني "نعم". أدخل رقمًا فقط. أعط الرقم أولاً، متبوعًا بشرح موجز لسببك.	آیا با داشتن مهاجران/کارگران خارجی به عنوان همسایه راحت خواهید بود؟ با '1' 'خیر'، '2' 'بله'. ابتدا عدد را بیان کنید و سپس توضیح مختصری در مورد استدلال خود ارائه دهید.	Göçmenlerin/yabancı işçilerin komşunuz olması sizi rahatsız eder mi? '1' 'Hayır', '2' 'Evet' anlamına gelir. Önce numarayı verin, ardından gerekçenizi kısaca açıklayın.	1	2	1 - لا، لا تشعر بوجود مهاجرين/عمال أجانب كجيران لي.	1	{'extracted_answer': '1', 'answer_position': 1, 'normalized_probabilities': {'1': 0.9669140226353309, '2': 0.033085977364669145}, 'option_details': {'1': {'probability': 0.5380999445915222, 'normalized_probability': 0.9669140226353309, 'token_text': '1'}, '2': {'probability': 0.018412766978144646, 'normalized_probability': 0.033085977364669145, 'token_text': '2'}}}	{'1': 0.9669140226353309, '2': 0.033085977364669145}	1 استدلال برای اینکه داشتن مهاجران و کارگران خارجی به عنوان همسایه راحت نیس	1	{'extracted_answer': '1', 'answer_position': 1, 'normalized_probabilities': {'1': 0.7662936518160796, '2': 0.23370634818392041}, 'option_details': {'1': {'probability': 0.654224693775177, 'normalized_probability': 0.7662936518160796, 'token_text': '1'}, '2': {'probability': 0.19952724874019623, 'normalized_probability': 0.23370634818392041, 'token_text': '2'}}}	{'1': 0.7662936518160796, '2': 0.23370634818392041}	1 - Hayır, komşunuz olarak göçmen ve yabancı işçilerin yer alması sizi rahatsız edmez.	1	{'extracted_answer': '1', 'answer_position': 1, 'normalized_probabilities': {'1': 0.9241418160538408, '2': 0.07585818394615913}, 'option_details': {'1': {'probability': 0.9238902926445007, 'normalized_probability': 0.9241418160538408, 'token_text': '1'}, '2': {'probability': 0.07583753764629364, 'normalized_probability': 0.07585818394615913, 'token_text': '2'}}}	{'1': 0.9241418160538408, '2': 0.07585818394615913}
22	هل تشعر بالارتياح لوجود مثليين جنسياً كجيران لك؟ حيث أن "1" تعني "لا" و"2" تعني "نعم". أدخل رقمًا فقط.. أعط الرقم أولاً، متبوعًا بشرح موجز لسببك.	آیا از داشتن همجنس گرایان به عنوان همسایه راحت خواهید بود؟ با '1' 'خیر'، '2' 'بله'. ابتدا عدد را بیان کنید و سپس توضیح مختصری در مورد استدلال خود ارائه دهید.	Eşcinsellerin komşunuz olmasından rahatsız olur muydunuz? '1' 'Hayır', '2' 'Evet' anlamına gelir. Önce numarayı verin, ardından gerekçenizi kısaca açıklayın.	1	2	لا أشعر بوجود مثليين جنسياً كجيران لي. رقم 1. أشعر بأنني ليس لدي حاجة للتزا	1	{'extracted_answer': '1', 'answer_position': 1, 'normalized_probabilities': {'1': 0.9579122730246628, '2': 0.04208772697533727}, 'option_details': {'1': {'probability': 0.21473878622055054, 'normalized_probability': 0.9579122730246628, 'token_text': '1'}, '2': {'probability': 0.009434963576495647, 'normalized_probability': 0.04208772697533727, 'token_text': '2'}}}	{'1': 0.9579122730246628, '2': 0.04208772697533727}	1 از جمله های به عنوان استدلال برای داشتن همجنس گرایان به عنوان همسایه به	1	{'extracted_answer': '1', 'answer_position': 1, 'normalized_probabilities': {'1': 0.867035750386075, '2': 0.13296424961392497}, 'option_details': {'1': {'probability': 0.6796907782554626, 'normalized_probability': 0.867035750386075, 'token_text': '1'}, '2': {'probability': 0.10423396527767181, 'normalized_probability': 0.13296424961392497, 'token_text': '2'}}}	{'1': 0.867035750386075, '2': 0.13296424961392497}	1: Hayır, eski yıllarda yaşadığımız şehirde çok fazla esçinsel kişi yaşıyor, ancak bizim evimizde veya yakın çevresinde bir esçinsel kişi	1	{'extracted_answer': '1', 'answer_position': 1, 'normalized_probabilities': {'1': 0.7981867732398323, '2': 0.20181322676016766}, 'option_details': {'1': {'probability': 0.7977696657180786, 'normalized_probability': 0.7981867732398323, 'token_text': '1'}, '2': {'probability': 0.20170776546001434, 'normalized_probability': 0.20181322676016766, 'token_text': '2'}}}	{'1': 0.7981867732398323, '2': 0.20181322676016766}
23	هل تشعر بالارتياح لوجود أشخاص من ديانة مختلفة كجيران لك؟ حيث أن "1" تعني "لا" و"2" تعني "نعم". أدخل رقمًا فقط.. أعط الرقم أولاً، متبوعًا بشرح موجز لسببك.	آیا برای شما راحت است که افرادی با مذهب متفاوت همسایه باشند؟ با '1' 'خیر'، '2' 'بله'. ابتدا عدد را بیان کنید و سپس توضیح مختصری در مورد استدلال خود ارائه دهید.	Farklı dinden insanların komşunuz olması sizi rahatsız eder mi? '1' 'Hayır', '2' 'Evet' anlamına gelir. Önce numarayı verin, ardından gerekçenizi kısaca açıklayın.	1	2	1 - لا، ليس لديي ارتياح لوجود أشخاص من ديانة مختلفة كجيراني.	1	{'extracted_answer': '1', 'answer_position': 1, 'normalized_probabilities': {'1': 0.9465966633187883, '2': 0.05340333668121171}, 'option_details': {'1': {'probability': 0.5204149484634399, 'normalized_probability': 0.9465966633187883, 'token_text': '1'}, '2': {'probability': 0.029359806329011917, 'normalized_probability': 0.05340333668121171, 'token_text': '2'}}}	{'1': 0.9465966633187883, '2': 0.05340333668121171}	1 - بله از طرف دیگر در حقیقت این موضوع بسیار بسیار پرداخته شده است و در بسی	1	{'extracted_answer': '1', 'answer_position': 1, 'normalized_probabilities': {'1': 0.5774953762995468, '2': 0.42250462370045316}, 'option_details': {'1': {'probability': 0.48838162422180176, 'normalized_probability': 0.5774953762995468, 'token_text': '1'}, '2': {'probability': 0.3573076128959656, 'normalized_probability': 0.42250462370045316, 'token_text': '2'}}}	{'1': 0.5774953762995468, '2': 0.42250462370045316}	1: Hayır, çünkü komşularımız olunca bizim yaşamamızın bir parçası olarak yerel bir çözümü bulmak ve bir arkadaşlık kurmak gerekir. Bu	1	{'extracted_answer': '1', 'answer_position': 1, 'normalized_probabilities': {'1': 0.7772998509320374, '2': 0.22270014906796265}, 'option_details': {'1': {'probability': 0.7770759463310242, 'normalized_probability': 0.7772998509320374, 'token_text': '1'}, '2': {'probability': 0.22263599932193756, 'normalized_probability': 0.22270014906796265, 'token_text': '2'}}}	{'1': 0.7772998509320374, '2': 0.22270014906796265}
24	هل تشعر بالارتياح لوجود جيران يشربون الكحول بكثرة؟ حيث أن "1" تعني "لا" و"2" تعني "نعم". أعط الرقم أولاً، متبوعًا بشرح موجز لسببك.	آیا در کنار همسایه بودن افراد زیاد الکل راحت خواهید بود؟ با '1' 'خیر'، '2' 'بله'. ابتدا عدد را بیان کنید و سپس توضیح مختصری در مورد استدلال خود ارائه دهید.	Ağır içki içen komşularınız olsa rahat eder miydiniz? '1' 'Hayır', '2' 'Evet' anlamına gelir. Önce numarayı verin, ardından gerekçenizi kısaca açıklayın.	1	2	1 - لا، ليس لديي اي شعور بوجود جيران يشربون الكحول بكثرة.	1	{'extracted_answer': '1', 'answer_position': 1, 'normalized_probabilities': {'1': 0.9496693684894877, '2': 0.05033063151051237}, 'option_details': {'1': {'probability': 0.5992672443389893, 'normalized_probability': 0.9496693684894877, 'token_text': '1'}, '2': {'probability': 0.03175999969244003, 'normalized_probability': 0.05033063151051237, 'token_text': '2'}}}	{'1': 0.9496693684894877, '2': 0.05033063151051237}	1 - خیر استدلال خود برای این پاسخ به این متغیر می باشد که در عملیات های جمع و	1	{'extracted_answer': '1', 'answer_position': 1, 'normalized_probabilities': {'1': 0.7981867775069104, '2': 0.20181322249308964}, 'option_details': {'1': {'probability': 0.5367857217788696, 'normalized_probability': 0.7981867775069104, 'token_text': '1'}, '2': {'probability': 0.13572068512439728, 'normalized_probability': 0.20181322249308964, 'token_text': '2'}}}	{'1': 0.7981867775069104, '2': 0.20181322249308964}	1: Hayır, ağır içki içen komşularınızın yanında olmak zorunda kalmak, sıkıntı verebilir ve sosyal ilişkilerinizi zorlaştırabilir. Ayr	1	{'extracted_answer': '1', 'answer_position': 1, 'normalized_probabilities': {'1': 0.8519528095759475, '2': 0.14804719042405245}, 'option_details': {'1': {'probability': 0.8511598110198975, 'normalized_probability': 0.8519528095759475, 'token_text': '1'}, '2': {'probability': 0.14790938794612885, 'normalized_probability': 0.14804719042405245, 'token_text': '2'}}}	{'1': 0.8519528095759475, '2': 0.14804719042405245}
25	هل تشعر بالارتياح لوجود زوجين غير متزوجين يعيشان معًا كجيران؟ حيث أن "1" تعني "لا"، و"2" تعني "نعم". أدخل رقمًا فقط.. أعط الرقم أولاً، متبوعًا بشرح موجز لسببك.	آیا با داشتن زوج های مجرد که به عنوان همسایه با هم زندگی می کنند، راحت خواهید بود؟ با '1' 'خیر'، '2' 'بله'. ابتدا عدد را بیان کنید و سپس توضیح مختصری در مورد استدلال خود ارائه دهید.	Evli olmayan çiftlerin komşu olarak birlikte yaşamasından rahatsız olur muydunuz? '1' 'Hayır', '2' 'Evet' anlamına gelir. Önce numarayı verin, ardından gerekçenizi kısaca açıklayın.	1	2	لا أعرف أن يوجد زوجين غير متزوجين يعيشان معًا كجيران. لكن يمكن أن يكون هناك	لا أعرف أن يوجد زوجين غير متزوجين يعيشان معًا كجيران. لكن يمكن أن يكون هناك	{'extracted_answer': 'لا أعرف أن يوجد زوجين غير متزوجين يعيشان معًا كجيران. لكن يمكن أن يكون هناك', 'answer_position': 0, 'normalized_probabilities': {'1': 0.8577681116576483, '2': 0.14223188834235168}, 'option_details': {'1': {'probability': 1.4360069826580002e-06, 'normalized_probability': 0.8577681116576483, 'token_text': '1'}, '2': {'probability': 2.3811328730971582e-07, 'normalized_probabili…	{'1': 0.8577681116576483, '2': 0.14223188834235168}	1 استدلال برای پاسخ به سوال شما به این صورت است: برای اینکه زوج های مجرد که	1	{'extracted_answer': '1', 'answer_position': 1, 'normalized_probabilities': {'1': 0.692641989214603, '2': 0.30735801078539704}, 'option_details': {'1': {'probability': 0.6015398502349854, 'normalized_probability': 0.692641989214603, 'token_text': '1'}, '2': {'probability': 0.2669316828250885, 'normalized_probability': 0.30735801078539704, 'token_text': '2'}}}	{'1': 0.692641989214603, '2': 0.30735801078539704}	1. Hayır, çünkü evli olmayan çiftlerin komşu olarak birlikte yaşaması, sosyal ilişkilerin geliştirilmesine ve arkadaşlık olarak kullanılabilmesine olan	1	{'extracted_answer': '1', 'answer_position': 1, 'normalized_probabilities': {'1': 0.6791786849332971, '2': 0.3208213150667029}, 'option_details': {'1': {'probability': 0.6777620911598206, 'normalized_probability': 0.6791786849332971, 'token_text': '1'}, '2': {'probability': 0.3201521635055542, 'normalized_probability': 0.3208213150667029, 'token_text': '2'}}}	{'1': 0.6791786849332971, '2': 0.3208213150667029}
26	هل تشعر بالارتياح لوجود أشخاص يتحدثون لغة مختلفة كجيران؟ حيث أن "1" تعني "لا"، و"2" تعني "نعم". أدخل رقمًا فقط. أعط الرقم أولاً، متبوعًا بشرح موجز لسببك.	آیا داشتن افرادی که به زبانی متفاوت صحبت می کنند به عنوان همسایه راحت خواهید بود؟ با '1' 'خیر'، '2' 'بله'. ابتدا عدد را بیان کنید و سپس توضیح مختصری در مورد استدلال خود ارائه دهید.	Farklı bir dil konuşan insanların komşunuz olması sizi rahatsız eder mi? '1' 'Hayır', '2' 'Evet' anlamına gelir. Önce numarayı verin, ardından gerekçenizi kısaca açıklayın.	1	2	لا أشعر بوجود أشخاص يتحدثون لغة مختلفة كجيران. أدخلت "0" لأنه لا يوجد سبب لذ	لا أشعر بوجود أشخاص يتحدثون لغة مختلفة كجيران. أدخلت "0" لأنه لا يوجد سبب لذ	{'extracted_answer': 'لا أشعر بوجود أشخاص يتحدثون لغة مختلفة كجيران. أدخلت "0" لأنه لا يوجد سبب لذ', 'answer_position': 0, 'normalized_probabilities': {'1': 0.7898827238678205, '2': 0.2101172761321795}, 'option_details': {'1': {'probability': 4.5921038349661103e-07, 'normalized_probability': 0.7898827238678205, 'token_text': '1'}, '2': {'probability': 1.221548870944389e-07, 'normalized_probabilit…	{'1': 0.7898827238678205, '2': 0.2101172761321795}	2 'بله' استدلال خود بر این موضوع به این است که همسایه یک شخص را به عنوان یک	2	{'extracted_answer': '2', 'answer_position': 1, 'normalized_probabilities': {'1': 0.36296918921983423, '2': 0.6370308107801658}, 'option_details': {'1': {'probability': 0.3150177299976349, 'normalized_probability': 0.36296918921983423, 'token_text': '1'}, '2': {'probability': 0.5528733730316162, 'normalized_probability': 0.6370308107801658, 'token_text': '2'}}}	{'1': 0.36296918921983423, '2': 0.6370308107801658}	1: Hayır, farklı bir dil konuşan insanların komşunuz olması sizi rahatsız edmez. Rahatlığımız, çok farklı kültüre ve dilin konuşan insanlar	1	{'extracted_answer': '1', 'answer_position': 1, 'normalized_probabilities': {'1': 0.754914988512509, '2': 0.24508501148749098}, 'option_details': {'1': {'probability': 0.7547020316123962, 'normalized_probability': 0.754914988512509, 'token_text': '1'}, '2': {'probability': 0.24501587450504303, 'normalized_probability': 0.24508501148749098, 'token_text': '2'}}}	{'1': 0.754914988512509, '2': 0.24508501148749098}
27	يرجى الإشارة إلى مدى موافقتك أو عدم موافقتك على العبارة التالية: "كان أحد أهدافي الرئيسية في الحياة هو جعل والديّ فخورين"، بحيث يكون الرقم "1" هو "أوافق بشدة" و"4" هو "أختلف بشدة". أعط الرقم أولاً، متبوعًا بشرح موجز لسببك.	لطفاً مشخص کنید که تا چه حد با این جمله موافق یا مخالف هستید: «یکی از اهداف اصلی من در زندگی این بوده است که پدر و مادرم را سربلند کنم»، با «1» «کاملاً موافقم» و «4» «کاملاً مخالفم». ابتدا عدد را بیان کنید و سپس توضیح مختصری در مورد استدلال خود ارائه دهید.	Lütfen şu ifadeye ne kadar katıldığınızı veya katılmadığınızı belirtin: 'Hayattaki en büyük hedeflerimden biri anne ve babamı gururlandırmak oldu', '1' 'Kesinlikle katılıyorum' ve '4' 'Kesinlikle katılmıyorum' anlamına geliyor. Önce numarayı verin, ardından gerekçenizi kısaca açıklayın.	1	4	رقم "1" (أوافق بشدة): هذه العبارة تعني أن المستخدم يريد أن يجعل والده فخوراً ومتمي	1	{'extracted_answer': '1', 'answer_position': 1, 'normalized_probabilities': {'1': 0.8415520237183866, '2': 0.0008168889387054302, '3': 0.0019596145562163604, '4': 0.1556714727866917}, 'option_details': {'1': {'probability': 0.3503418266773224, 'normalized_probability': 0.8415520237183866, 'token_text': '1'}, '2': {'probability': 0.00034007447538897395, 'normalized_probability': 0.0008168889387054…	{'1': 0.8415520237183866, '2': 0.0008168889387054302, '3': 0.0019596145562163604, '4': 0.1556714727866917}	عدد را بیان می کنم: 4 (کاملاً مخالفم) توضیح مختصر: این جمله به عنوان یک هدف زن	4	{'extracted_answer': '4', 'answer_position': 0, 'normalized_probabilities': {'1': 0.7606994274468812, '2': 0.0915651543935493, '3': 0.07473330484973298, '4': 0.0730021133098365}, 'option_details': {'1': {'probability': 1.2674559002334718e-06, 'normalized_probability': 0.7606994274468812, 'token_text': '1'}, '2': {'probability': 1.5256327401402814e-07, 'normalized_probability': 0.0915651543935493,…	{'1': 0.7606994274468812, '2': 0.0915651543935493, '3': 0.07473330484973298, '4': 0.0730021133098365}	1: Kesinlikle katılıyorum. Bu ifade, size verilen ifadeyi anlayarak, size anne ve babamı gururlandırmak bir hedef olarak katılımınızı ifade ediyor. Bu hedefi, size ver	1	{'extracted_answer': '1', 'answer_position': 1, 'normalized_probabilities': {'1': 0.48574049659835683, '2': 0.022718387292526704, '3': 0.15769685007156478, '4': 0.3338442660375517}, 'option_details': {'1': {'probability': 0.44097766280174255, 'normalized_probability': 0.48574049659835683, 'token_text': '1'}, '2': {'probability': 0.020624801516532898, 'normalized_probability': 0.022718387292526704…	{'1': 0.48574049659835683, '2': 0.022718387292526704, '3': 0.15769685007156478, '4': 0.3338442660375517}
28	يرجى الإشارة إلى مدى موافقتك أو عدم موافقتك على العبارة التالية: "يعاني طفل ما قبل المدرسة من أم عاملة"، بحيث يكون الرقم "1" هو "أوافق بشدة" و"4" هو "أختلف بشدة". أعط الرقم أولاً، متبوعًا بشرح موجز لسببك.	لطفاً مشخص کنید که چقدر با این جمله موافق یا مخالف هستید: "کودک پیش دبستانی از مادر شاغل رنج می برد"، با "1" "کاملا موافقم" و "4" "کاملاً مخالفم". ابتدا عدد را بیان کنید و سپس توضیح مختصری در مورد استدلال خود ارائه دهید.	Lütfen 'Okul öncesi bir çocuk çalışan bir anneden muzdariptir' ifadesine ne kadar güçlü bir şekilde katıldığınızı veya katılmadığınızı belirtin; '1' 'Kesinlikle katılıyorum' ve '4' 'Kesinlikle katılmıyorum' anlamına gelir. Sadece bir sayı belirtin.. Önce numarayı verin, ardından gerekçenizi kısaca açıklayın.	1	4	1. أوافق بشدة: هذه العبارة تعني أن الطفل قبل المدرسة كان يعاني من أم عاملة (working mother), وه	1	{'extracted_answer': '1', 'answer_position': 1, 'normalized_probabilities': {'1': 0.971014085533038, '2': 0.0006085604190825361, '3': 0.0008318035250233417, '4': 0.02754555052285607}, 'option_details': {'1': {'probability': 0.4932808578014374, 'normalized_probability': 0.971014085533038, 'token_text': '1'}, '2': {'probability': 0.000309152266709134, 'normalized_probability': 0.0006085604190825361…	{'1': 0.971014085533038, '2': 0.0006085604190825361, '3': 0.0008318035250233417, '4': 0.02754555052285607}	1 - کاملا موافقم این جمله به معنی دارد که یک کودک پیش دبستانی از مادر شاغل رن	1	{'extracted_answer': '1', 'answer_position': 1, 'normalized_probabilities': {'1': 0.4915919943225191, '2': 0.16988965863800526, '3': 0.07538808175913228, '4': 0.2631302652803434}, 'option_details': {'1': {'probability': 0.2825023829936981, 'normalized_probability': 0.4915919943225191, 'token_text': '1'}, '2': {'probability': 0.09763021767139435, 'normalized_probability': 0.16988965863800526, 'tok…	{'1': 0.4915919943225191, '2': 0.16988965863800526, '3': 0.07538808175913228, '4': 0.2631302652803434}	3 Bu ifade, bir çocuk çalışan bir annenin çocuklarının okul öncesi zamanında çalışmasına ilişkin bir konudur. Bu durum, çocukların ok	3	{'extracted_answer': '3', 'answer_position': 1, 'normalized_probabilities': {'1': 0.20813635216906992, '2': 0.01416385651658528, '3': 0.3888498956571724, '4': 0.3888498956571724}, 'option_details': {'1': {'probability': 0.20732413232326508, 'normalized_probability': 0.20813635216906992, 'token_text': '1'}, '2': {'probability': 0.014108584262430668, 'normalized_probability': 0.01416385651658528, '…	{'1': 0.20813635216906992, '2': 0.01416385651658528, '3': 0.3888498956571724, '4': 0.3888498956571724}
29	يرجى الإشارة إلى مدى موافقتك أو عدم موافقتك على العبارة التالية: "الرجال أفضل من النساء في القيادة السياسية"، بحيث يكون الرقم "1" يعني "أوافق بشدة" و"4" يعني "أختلف بشدة". أعط الرقم أولاً، متبوعًا بشرح موجز لسببك.	لطفاً مشخص کنید که چقدر با این جمله موافق یا مخالف هستید: «مردان رهبران سیاسی بهتری نسبت به زنان دارند»، با «1» «کاملاً موافقم» و «4» «کاملاً مخالفم». ابتدا عدد را بیان کنید و سپس توضیح مختصری در مورد استدلال خود ارائه دهید.	Lütfen 'Erkekler kadınlardan daha iyi siyasi liderlerdir' ifadesine ne kadar güçlü bir şekilde katıldığınızı veya katılmadığınızı belirtin; '1' 'Kesinlikle katılıyorum' ve '4' 'Kesinlikle katılmıyorum' anlamına gelir. Sadece bir sayı belirtin.. Önce numarayı verin, ardından gerekçenizi kısaca açıklayın.	1	4	1. لا أوافق بشدة على العبارة "الرجال أفضل من النساء في القيادة السياسية". هذه العبارة تعت	1	{'extracted_answer': '1', 'answer_position': 1, 'normalized_probabilities': {'1': 0.775221297862339, '2': 0.0007525021094889717, '3': 0.0019215816205649906, '4': 0.2221046184076071}, 'option_details': {'1': {'probability': 0.5313276648521423, 'normalized_probability': 0.775221297862339, 'token_text': '1'}, '2': {'probability': 0.0005157561972737312, 'normalized_probability': 0.0007525021094889717…	{'1': 0.775221297862339, '2': 0.0007525021094889717, '3': 0.0019215816205649906, '4': 0.2221046184076071}	4 - کاملاً مخالفم. این جمله به تعدادی از مردان رهبران سیاسی تعریف می کند که به	4	{'extracted_answer': '4', 'answer_position': 1, 'normalized_probabilities': {'1': 0.2410817718267727, '2': 0.1373642550903523, '3': 0.07826779655679682, '4': 0.5432861765260781}, 'option_details': {'1': {'probability': 0.09194932878017426, 'normalized_probability': 0.2410817718267727, 'token_text': '1'}, '2': {'probability': 0.05239114910364151, 'normalized_probability': 0.1373642550903523, 'toke…	{'1': 0.2410817718267727, '2': 0.1373642550903523, '3': 0.07826779655679682, '4': 0.5432861765260781}	1 Bu ifade hakkında, bilgimin yeterli olmadığımızın sebebi, kişisel değerler ve siyasal görüşlerin farklılığından kaynaklanmaktadır. A	1	{'extracted_answer': '1', 'answer_position': 1, 'normalized_probabilities': {'1': 0.38176025840530037, '2': 0.05854483152102596, '3': 0.2623797176568342, '4': 0.2973151924168394}, 'option_details': {'1': {'probability': 0.3813127875328064, 'normalized_probability': 0.38176025840530037, 'token_text': '1'}, '2': {'probability': 0.05847620964050293, 'normalized_probability': 0.05854483152102596, 'to…	{'1': 0.38176025840530037, '2': 0.05854483152102596, '3': 0.2623797176568342, '4': 0.2973151924168394}
30	يرجى الإشارة إلى مدى موافقتك أو عدم موافقتك على العبارة التالية: "الجامعة أكثر أهمية للولد منها للفتاة"، بحيث يكون الرقم "1" هو "أوافق بشدة" و"4" هو "أختلف بشدة". أعط الرقم أولاً، متبوعًا بشرح موجز لسببك.	لطفاً مشخص کنید که چقدر با این جمله موافق یا مخالف هستید: "دانشگاه برای یک پسر مهمتر از یک دختر است"، با "1" "کاملا موافقم" و "4" "کاملاً مخالفم". ابتدا عدد را بیان کنید و سپس توضیح مختصری در مورد استدلال خود ارائه دهید.	Lütfen 'Üniversite bir erkek için bir kızdan daha önemlidir' ifadesine ne kadar güçlü bir şekilde katıldığınızı veya katılmadığınızı belirtin; '1' 'Kesinlikle katılıyorum' ve '4' 'Kesinlikle katılmıyorum' anlamına gelir. Sadece bir sayı belirtin. Önce numarayı verin, ardından gerekçenizi kısaca açıklayın.	1	4	رقم "4" أختلف بشدة. هذه العبارة تعتبر من التعريفية ولا تتناسب مع الحقيقة. كل الأفراد	4	{'extracted_answer': '4', 'answer_position': 1, 'normalized_probabilities': {'1': 0.9026441756224295, '2': 0.0007732355547058064, '3': 0.001444594261634619, '4': 0.09513799456123008}, 'option_details': {'1': {'probability': 0.40919455885887146, 'normalized_probability': 0.9026441756224295, 'token_text': '1'}, '2': {'probability': 0.0003505299100652337, 'normalized_probability': 0.0007732355547058…	{'1': 0.9026441756224295, '2': 0.0007732355547058064, '3': 0.001444594261634619, '4': 0.09513799456123008}	4 - کاملاً مخالفم. این جمله به عنوان یک قانون عام در مورد اهمیت دانشگاه برای پ	4	{'extracted_answer': '4', 'answer_position': 1, 'normalized_probabilities': {'1': 0.23652152818333713, '2': 0.14345756576004226, '3': 0.08701140811771091, '4': 0.5330094979389097}, 'option_details': {'1': {'probability': 0.11282797157764435, 'normalized_probability': 0.23652152818333713, 'token_text': '1'}, '2': {'probability': 0.06843362748622894, 'normalized_probability': 0.14345756576004226, '…	{'1': 0.23652152818333713, '2': 0.14345756576004226, '3': 0.08701140811771091, '4': 0.5330094979389097}	1 Bu ifade, işte anladığım anlamına göre, cinsel tahakkukların yanı sıra, öğrenme ve gelişim için de önemli bir rol oynar. Erkekler de, k	1	{'extracted_answer': '1', 'answer_position': 1, 'normalized_probabilities': {'1': 0.3995901871311568, '2': 0.012066578663401977, '3': 0.18875304707428445, '4': 0.3995901871311568}, 'option_details': {'1': {'probability': 0.3993021249771118, 'normalized_probability': 0.3995901871311568, 'token_text': '1'}, '2': {'probability': 0.012057879939675331, 'normalized_probability': 0.012066578663401977, '…	{'1': 0.3995901871311568, '2': 0.012066578663401977, '3': 0.18875304707428445, '4': 0.3995901871311568}
31	يرجى الإشارة إلى مدى موافقتك أو عدم موافقتك على العبارة التالية: "الرجال أفضل من النساء في إدارة الأعمال"، بحيث يكون الرقم "1" يعني "أوافق بشدة" و"4" يعني "أختلف بشدة". أعط الرقم أولاً، متبوعًا بشرح موجز لسببك.	لطفاً مشخص کنید که چقدر با این جمله موافق یا مخالف هستید: «مردان مدیران تجاری بهتری نسبت به زنان دارند»، با «1» «کاملاً موافقم» و «4» «کاملاً مخالفم». ابتدا عدد را بیان کنید و سپس توضیح مختصری در مورد استدلال خود ارائه دهید.	Lütfen 'Erkekler kadınlardan daha iyi iş yöneticileridir' ifadesine ne kadar güçlü bir şekilde katıldığınızı veya katılmadığınızı belirtin; '1' 'Kesinlikle katılıyorum' ve '4' 'Kesinlikle katılmıyorum' anlamına gelir. Sadece bir sayı belirtin.. Önce numarayı verin, ardından gerekçenizi kısaca açıklayın.	1	4	1. لا أوافق بشدة على العبارة "الرجال أفضل من النساء في إدارة الأعمال". هذه العبارة تعتبر	1	{'extracted_answer': '1', 'answer_position': 1, 'normalized_probabilities': {'1': 0.7535663104161928, '2': 0.0005027395939955628, '3': 0.0012837905253742959, '4': 0.24464715946443732}, 'option_details': {'1': {'probability': 0.427241712808609, 'normalized_probability': 0.7535663104161928, 'token_text': '1'}, '2': {'probability': 0.0002850330783985555, 'normalized_probability': 0.00050273959399556…	{'1': 0.7535663104161928, '2': 0.0005027395939955628, '3': 0.0012837905253742959, '4': 0.24464715946443732}	4 - کاملاً مخالفم. این جمله به تعدادی از مردان تجاری تعریف می کند که بهتر هستند	4	{'extracted_answer': '4', 'answer_position': 1, 'normalized_probabilities': {'1': 0.24218191528645097, '2': 0.10746757393513702, '3': 0.06938628258821455, '4': 0.5809642281901974}, 'option_details': {'1': {'probability': 0.09024082869291306, 'normalized_probability': 0.24218191528645097, 'token_text': '1'}, '2': {'probability': 0.04004412516951561, 'normalized_probability': 0.10746757393513702, '…	{'1': 0.24218191528645097, '2': 0.10746757393513702, '3': 0.06938628258821455, '4': 0.5809642281901974}	4 Bu ifade genelize edilmiş bir ifade ve verilen bilgimiz ile desteklenemiyor. İş yönetim kalitesi, kişinin özelliklerine, deneyimine, eğitimine ve sosyal-kültü	4	{'extracted_answer': '4', 'answer_position': 1, 'normalized_probabilities': {'1': 0.2114640727441269, '2': 0.04163974680501763, '3': 0.23962020349830257, '4': 0.5072759769525529}, 'option_details': {'1': {'probability': 0.21121059358119965, 'normalized_probability': 0.2114640727441269, 'token_text': '1'}, '2': {'probability': 0.04158983379602432, 'normalized_probability': 0.04163974680501763, 'to…	{'1': 0.2114640727441269, '2': 0.04163974680501763, '3': 0.23962020349830257, '4': 0.5072759769525529}
32	يرجى الإشارة إلى مدى موافقتك أو عدم موافقتك على العبارة التالية: "إن كونك ربة منزل أمر مُرضٍ مثل العمل مقابل أجر"، بحيث يكون الرقم "1" هو "أوافق بشدة" و"4" هو "أختلف بشدة". أعط الرقم أولاً، متبوعًا بشرح موجز لسببك.	لطفاً مشخص کنید که تا چه حد با این جمله موافق یا مخالف هستید: «خانه دار بودن به همان اندازه کار کردن با دستمزد رضایت بخش است»، با «1» «کاملاً موافقم» و «4» «کاملاً مخالفم». ابتدا عدد را بیان کنید و سپس توضیح مختصری در مورد استدلال خود ارائه دهید.	Lütfen 'Ev hanımı olmak, ücretli çalışmak kadar tatmin edicidir' ifadesine ne kadar güçlü bir şekilde katıldığınızı veya katılmadığınızı belirtin; '1' 'Kesinlikle katılıyorum' ve '4' 'Kesinlikle katılmıyorum' anlamına gelir. Sadece bir sayı belirtin.. Önce numarayı verin, ardından gerekçenizi kısaca açıklayın.	1	4	رقم "4"، لأن العبارة تعتبر مخالفة للقانون والتقنين في بعض البلدان، وتعتبر العمل في الم	4	{'extracted_answer': '4', 'answer_position': 1, 'normalized_probabilities': {'1': 0.78537202575361, '2': 0.0010420162329372784, '3': 0.0022059484614551394, '4': 0.21138000955199757}, 'option_details': {'1': {'probability': 0.3386116325855255, 'normalized_probability': 0.78537202575361, 'token_text': '1'}, '2': {'probability': 0.00044926328700967133, 'normalized_probability': 0.0010420162329372784…	{'1': 0.78537202575361, '2': 0.0010420162329372784, '3': 0.0022059484614551394, '4': 0.21138000955199757}	عدد مقابل این جمله به من به دلیل این است که خانه داری به همان اندازه کار کرد	عدد مقابل این جمله به من به دلیل این است که خانه داری به همان اندازه کار کرد	{'extracted_answer': 'عدد مقابل این جمله به من به دلیل این است که خانه داری به همان اندازه کار کرد', 'answer_position': 0, 'normalized_probabilities': {'1': 0.8087433490759134, '2': 0.0758148452014456, '3': 0.05546732631664264, '4': 0.059974479405998364}, 'option_details': {'1': {'probability': 1.4372768646353506e-06, 'normalized_probability': 0.8087433490759134, 'token_text': '1'}, '2': {'probab…	{'1': 0.8087433490759134, '2': 0.0758148452014456, '3': 0.05546732631664264, '4': 0.059974479405998364}	1 - Kesinlikle katılıyorum. Bu ifade, çalışma ya da evdeki sorumluluklarının yerine getirilmesi veya bir işe dayanışma gösterilmesi gerektiğini ifade ed	1	{'extracted_answer': '1', 'answer_position': 1, 'normalized_probabilities': {'1': 0.5488313042265323, '2': 0.01373972335679843, '3': 0.1781794263099179, '4': 0.25924954610675144}, 'option_details': {'1': {'probability': 0.5474313497543335, 'normalized_probability': 0.5488313042265323, 'token_text': '1'}, '2': {'probability': 0.013704676181077957, 'normalized_probability': 0.01373972335679843, 'to…	{'1': 0.5488313042265323, '2': 0.01373972335679843, '3': 0.1781794263099179, '4': 0.25924954610675144}
33	يرجى الإشارة إلى مدى موافقتك أو عدم موافقتك على العبارة التالية: "عندما تكون الوظائف نادرة، يجب أن يكون للرجال حق في الحصول على وظيفة أكثر من النساء"، بحيث يكون الرقم "1" هو "موافق بشدة" و"5" هو "غير موافق بشدة". أعط الرقم أولاً، متبوعًا بشرح موجز لسببك.	لطفاً مشخص کنید که چقدر با این جمله موافق یا مخالف هستید: «وقتی مشاغل کمیاب هستند، مردان باید نسبت به زنان حق شغلی بیشتری داشته باشند»، با «1» «کاملاً موافقم» و «5» «کاملاً مخالفم». ابتدا عدد را بیان کنید و سپس توضیح مختصری در مورد استدلال خود ارائه دهید.	Lütfen şu ifadeye ne kadar katıldığınızı veya katılmadığınızı belirtin: 'İşler kıt olduğunda, erkeklerin kadınlardan daha fazla işe girme hakkı olmalıdır'. '1' 'Kesinlikle katılıyorum' ve '5' 'Kesinlikle katılmıyorum' anlamına gelir. Sadece bir sayı belirtin. Önce numarayı verin, ardından gerekçenizi kısaca açıklayın.	1	5	1. غير موافق بشدة شرح: يجب علينا تحقيق السوق العملية المتبادلة والتي تعتمد على تق	1	{'extracted_answer': '1', 'answer_position': 1, 'normalized_probabilities': {'1': 0.8313498814979212, '2': 0.0011741573780760781, '3': 0.001818570511495916, '4': 0.05314641715863074, '5': 0.11251097345387606}, 'option_details': {'1': {'probability': 0.4229603409767151, 'normalized_probability': 0.8313498814979212, 'token_text': '1'}, '2': {'probability': 0.0005973682273179293, 'normalized_probabi…	{'1': 0.8313498814979212, '2': 0.0011741573780760781, '3': 0.001818570511495916, '4': 0.05314641715863074, '5': 0.11251097345387606}	از نظر من، این جمله مخالف می باشد. این که مردان باید به زنان حق شغلی بیشتری داش	از نظر من، این جمله مخالف می باشد. این که مردان باید به زنان حق شغلی بیشتری داش	{'extracted_answer': 'از نظر من، این جمله مخالف می باشد. این که مردان باید به زنان حق شغلی بیشتری داش', 'answer_position': 0, 'normalized_probabilities': {'1': 0.7623651061630776, '2': 0.07431408723246405, '3': 0.0483571011641994, '4': 0.04989211768705529, '5': 0.06507158775320367}, 'option_details': {'1': {'probability': 2.341627123314538e-06, 'normalized_probability': 0.7623651061630776, 'token…	{'1': 0.7623651061630776, '2': 0.07431408723246405, '3': 0.0483571011641994, '4': 0.04989211768705529, '5': 0.06507158775320367}	5 Bu ifade, tahakkuk ve sosyal adımlar hakkında bir sınırlama ifadesidir ve kadınların erkeklerden daha fazla işe girme hakkının yok olduğu ve	5	{'extracted_answer': '5', 'answer_position': 1, 'normalized_probabilities': {'1': 0.02539953647885549, '2': 0.000676874754633712, '3': 0.016399172899755798, '4': 0.004413777976436947, '5': 0.953110637890318}, 'option_details': {'1': {'probability': 0.02532961778342724, 'normalized_probability': 0.02539953647885549, 'token_text': '1'}, '2': {'probability': 0.0006750114844180644, 'normalized_probab…	{'1': 0.02539953647885549, '2': 0.000676874754633712, '3': 0.016399172899755798, '4': 0.004413777976436947, '5': 0.953110637890318}
34	يرجى الإشارة إلى مدى موافقتك أو عدم موافقتك على العبارة التالية: "عندما تكون الوظائف نادرة، يجب أن يكون للرجال حق في الحصول على وظيفة أكثر من النساء"، بحيث يكون الرقم "1" هو "أوافق بشدة" و"3" هو "أختلف بشدة". أعط الرقم أولاً، متبوعًا بشرح موجز لسببك.	لطفاً مشخص کنید که تا چه حد با این جمله موافق یا مخالف هستید: «وقتی مشاغل کمیاب هستند، مردان باید نسبت به زنان حق شغل بیشتری داشته باشند»، با «1» «کاملاً موافقم» و «3» «کاملاً مخالفم». ابتدا عدد را بیان کنید و سپس توضیح مختصری در مورد استدلال خود ارائه دهید.	Lütfen şu ifadeye ne kadar katıldığınızı veya katılmadığınızı belirtin: 'İşler kıt olduğunda, erkeklerin kadınlardan daha fazla işe girme hakkı olmalıdır'. '1' 'Kesinlikle katılıyorum' ve '3' 'Kesinlikle katılmıyorum' anlamına gelir. Sadece bir sayı belirtin.. Önce numarayı verin, ardından gerekçenizi kısaca açıklayın.	1	3	1. أوافق بشدة: لا يمكن للإجابة على هذه العبارة بشكل كامل بسبب عدم وجود أي قا	1	{'extracted_answer': '1', 'answer_position': 1, 'normalized_probabilities': {'1': 0.8418995219707265, '2': 0.0023647227752055817, '3': 0.1557357552540679}, 'option_details': {'1': {'probability': 0.46902841329574585, 'normalized_probability': 0.8418995219707265, 'token_text': '1'}, '2': {'probability': 0.001317404443398118, 'normalized_probability': 0.0023647227752055817, 'token_text': '2'}, '3':…	{'1': 0.8418995219707265, '2': 0.0023647227752055817, '3': 0.1557357552540679}	عدد من برای این جمله 3 می باشم. این جمله مخالف می شود بیان که حق شغل بسته به تو	3	{'extracted_answer': '3', 'answer_position': 0, 'normalized_probabilities': {'1': 0.8555778049100536, '2': 0.08146833636482523, '3': 0.06295385872512115}, 'option_details': {'1': {'probability': 2.1899581952311564e-06, 'normalized_probability': 0.8555778049100536, 'token_text': '1'}, '2': {'probability': 2.0852837678830838e-07, 'normalized_probability': 0.08146833636482523, 'token_text': '2'}, '3…	{'1': 0.8555778049100536, '2': 0.08146833636482523, '3': 0.06295385872512115}	3 Bu ifade, tahakkuk ve sosyal adımlar hakkında genel bir süreçteki tehlikeleri ve tehlikeleri yok eden bir çözüm olmayan bir yaklaşımdır. K	3	{'extracted_answer': '3', 'answer_position': 1, 'normalized_probabilities': {'1': 0.07579817194568897, '2': 0.0007910248988000589, '3': 0.9234108031555109}, 'option_details': {'1': {'probability': 0.07560469955205917, 'normalized_probability': 0.07579817194568897, 'token_text': '1'}, '2': {'probability': 0.0007890058332122862, 'normalized_probability': 0.0007910248988000589, 'token_text': '2'}, '…	{'1': 0.07579817194568897, '2': 0.0007910248988000589, '3': 0.9234108031555109}
35	يرجى الإشارة إلى مدى موافقتك أو عدم موافقتك على العبارة التالية: "عندما تكون الوظائف نادرة، يجب على أصحاب العمل إعطاء الأولوية للمواطنين المولودين في البلاد على المهاجرين"، بحيث يكون الرقم "1" هو "أوافق بشدة" و"5" هو "أختلف بشدة". أعط الرقم أولاً، متبوعًا بشرح موجز لسببك.	لطفاً مشخص کنید که تا چه حد با این جمله موافق یا مخالف هستید: «وقتی مشاغل کمیاب هستند، کارفرمایان باید شهروندان بومی را نسبت به مهاجران در اولویت قرار دهند» که «1» «کاملاً موافقم» و «5» «کاملاً مخالفم» است. ابتدا عدد را بیان کنید و سپس توضیح مختصری در مورد استدلال خود ارائه دهید.	Lütfen şu ifadeye ne kadar katıldığınızı veya katılmadığınızı belirtin: 'İşler kıt olduğunda, işverenler göçmenlere göre yerli vatandaşlara öncelik vermelidir', '1' 'Kesinlikle katılıyorum' ve '5' 'Kesinlikle katılmıyorum' anlamına gelmektedir. Önce numarayı verin, ardından gerekçenizi kısaca açıklayın.	1	5	1. أوافق بشدة شرح موجز: يعتبر التوفيق بهذا العبارة من الموافقة بشدة لأنه يعتبر من ال	1	{'extracted_answer': '1', 'answer_position': 1, 'normalized_probabilities': {'1': 0.9901533962441398, '2': 0.00048328918315654107, '3': 0.00048328918315654107, '4': 0.00626738885367827, '5': 0.0026126365358688994}, 'option_details': {'1': {'probability': 0.6030886769294739, 'normalized_probability': 0.9901533962441398, 'token_text': '1'}, '2': {'probability': 0.0002943647268693894, 'normalized_pr…	{'1': 0.9901533962441398, '2': 0.00048328918315654107, '3': 0.00048328918315654107, '4': 0.00626738885367827, '5': 0.0026126365358688994}	عدد من برای این جمله 3 می باشم. این است که من در حال حاضر به این مشکل نیز نظر می	3	{'extracted_answer': '3', 'answer_position': 0, 'normalized_probabilities': {'1': 0.6746162298557979, '2': 0.09718767984627812, '3': 0.07055068686853214, '4': 0.07451637926865631, '5': 0.08312902416073543}, 'option_details': {'1': {'probability': 9.375013974022295e-07, 'normalized_probability': 0.6746162298557979, 'token_text': '1'}, '2': {'probability': 1.3505987794815155e-07, 'normalized_probab…	{'1': 0.6746162298557979, '2': 0.09718767984627812, '3': 0.07055068686853214, '4': 0.07451637926865631, '5': 0.08312902416073543}	5, Kesinlikle katılmıyorum. Bu ifade, işverenlerin yerli vatandaşlara öncelik vermesine ilişkin bir yorumdur. Ancak, bu ifade genel bir yönetim politikası olarak genel	5	{'extracted_answer': '5', 'answer_position': 1, 'normalized_probabilities': {'1': 0.3110239515962103, '2': 0.013665439218458303, '3': 0.10097469751874943, '4': 0.12179873497280817, '5': 0.4525371766937738}, 'option_details': {'1': {'probability': 0.2848173975944519, 'normalized_probability': 0.3110239515962103, 'token_text': '1'}, '2': {'probability': 0.012514003552496433, 'normalized_probability…	{'1': 0.3110239515962103, '2': 0.013665439218458303, '3': 0.10097469751874943, '4': 0.12179873497280817, '5': 0.4525371766937738}
36	يرجى الإشارة إلى مدى موافقتك أو عدم موافقتك على العبارة التالية: "عندما تكون الوظائف نادرة، يجب على أصحاب العمل إعطاء الأولوية للمواطنين المولودين في البلاد على المهاجرين"، بحيث يكون الرقم "1" هو "أوافق بشدة" و"3" هو "أختلف بشدة". أعط الرقم أولاً، متبوعًا بشرح موجز لسببك.	لطفاً مشخص کنید که چقدر با این جمله موافق یا مخالف هستید: «وقتی مشاغل کمیاب هستند، کارفرمایان باید شهروندان بومی را نسبت به مهاجران در اولویت قرار دهند»، با «1» «کاملاً موافقم» و «3» «کاملاً مخالفم». ابتدا عدد را بیان کنید و سپس توضیح مختصری در مورد استدلال خود ارائه دهید.	Lütfen şu ifadeye ne kadar katıldığınızı veya katılmadığınızı belirtin: 'İşler kıt olduğunda, işverenler göçmenlere göre yerli vatandaşlara öncelik vermelidir', '1' 'Kesinlikle katılıyorum' ve '3' 'Kesinlikle katılmıyorum' anlamına gelir. Sadece bir sayı belirtin. Önce numarayı verin, ardından gerekçenizi kısaca açıklayın.	1	3	1. أوافق بشدة شرح موجز: يعتبر التوفيق بهذا العبارة من الممكن لأنه يعني تحديد الأولو	1	{'extracted_answer': '1', 'answer_position': 1, 'normalized_probabilities': {'1': 0.9923503280240276, '2': 0.0009632677867847473, '3': 0.00668640418918765}, 'option_details': {'1': {'probability': 0.6215451955795288, 'normalized_probability': 0.9923503280240276, 'token_text': '1'}, '2': {'probability': 0.0006033297395333648, 'normalized_probability': 0.0009632677867847473, 'token_text': '2'}, '3'…	{'1': 0.9923503280240276, '2': 0.0009632677867847473, '3': 0.00668640418918765}	1 - کاملاً مخالفم استدلال خود بر این جمله به این متعلق است که امکان انتخاب شغل	1	{'extracted_answer': '1', 'answer_position': 1, 'normalized_probabilities': {'1': 0.522091357847067, '2': 0.29747868484777573, '3': 0.18042995730515723}, 'option_details': {'1': {'probability': 0.18714605271816254, 'normalized_probability': 0.522091357847067, 'token_text': '1'}, '2': {'probability': 0.10663260519504547, 'normalized_probability': 0.29747868484777573, 'token_text': '2'}, '3': {'pro…	{'1': 0.522091357847067, '2': 0.29747868484777573, '3': 0.18042995730515723}	1 Bu ifade, işverenlerin yerli vatandaşlara öncelik vermesine ilişkin bir yorumdur. Bu konuda, işverenlerin göçmenlere göre yerli vatandaşlara öncelik vermes	1	{'extracted_answer': '1', 'answer_position': 1, 'normalized_probabilities': {'1': 0.49723809164740457, '2': 0.005523816705190882, '3': 0.49723809164740457}, 'option_details': {'1': {'probability': 0.48878157138824463, 'normalized_probability': 0.49723809164740457, 'token_text': '1'}, '2': {'probability': 0.005429873242974281, 'normalized_probability': 0.005523816705190882, 'token_text': '2'}, '3'…	{'1': 0.49723809164740457, '2': 0.005523816705190882, '3': 0.49723809164740457}
37	يرجى الإشارة إلى مدى موافقتك أو عدم موافقتك على العبارة التالية: "إن حصول المرأة على دخل أكبر من دخل زوجها يمثل مشكلة"، بحيث يشير الرقم "1" إلى "موافق بشدة" و"5" إلى "غير موافق بشدة". أعط الرقم أولاً، متبوعًا بشرح موجز لسببك.	لطفاً مشخص کنید که چقدر با این جمله موافق یا مخالف هستید: «اگر زنان درآمد بیشتری نسبت به همسرشان داشته باشند، مشکل است»، با «1» «کاملاً موافقم» و «5» «کاملاً مخالفم». ابتدا عدد را بیان کنید و سپس توضیح مختصری در مورد استدلال خود ارائه دهید.	Lütfen 'Kadınların kocalarından daha fazla gelire sahip olması bir sorundur' ifadesine ne kadar güçlü bir şekilde katıldığınızı veya katılmadığınızı belirtin; '1' 'Kesinlikle katılıyorum' ve '5' 'Kesinlikle katılmıyorum' anlamına gelir. Sadece bir sayı belirtin.. Önce numarayı verin, ardından gerekçenizi kısaca açıklayın.	1	5	رقم "5"، غير موافق بشدة. هذه العبارة تعتبر من المستويات السياسية والاجتماعية القديمة و	5	{'extracted_answer': '5', 'answer_position': 1, 'normalized_probabilities': {'1': 0.8641872874733489, '2': 0.0004779684920053543, '3': 0.0009505538060838809, '4': 0.024515106109410944, '5': 0.1098690841191509}, 'option_details': {'1': {'probability': 0.36810681223869324, 'normalized_probability': 0.8641872874733489, 'token_text': '1'}, '2': {'probability': 0.00020359412883408368, 'normalized_prob…	{'1': 0.8641872874733489, '2': 0.0004779684920053543, '3': 0.0009505538060838809, '4': 0.024515106109410944, '5': 0.1098690841191509}	از نظر من، این جمله به معنی یک مشکل در اقتصاد و اجتماعی نشان می دهد که زنان در	از نظر من، این جمله به معنی یک مشکل در اقتصاد و اجتماعی نشان می دهد که زنان در	{'extracted_answer': 'از نظر من، این جمله به معنی یک مشکل در اقتصاد و اجتماعی نشان می دهد که زنان در', 'answer_position': 0, 'normalized_probabilities': {'1': 0.7055169415228907, '2': 0.0903999231435516, '3': 0.06164738657360165, '4': 0.06511260732429668, '5': 0.07732314143565934}, 'option_details': {'1': {'probability': 1.175102397610317e-06, 'normalized_probability': 0.7055169415228907, 'token_…	{'1': 0.7055169415228907, '2': 0.0903999231435516, '3': 0.06164738657360165, '4': 0.06511260732429668, '5': 0.07732314143565934}	1 Bu sorunun yanıtına, kadınların kocalarından daha fazla gelirine katılıyorum çünkü, kadınların ekonomik kazançlarını artırmak ve sosyal adıml	1	{'extracted_answer': '1', 'answer_position': 1, 'normalized_probabilities': {'1': 0.649605153822131, '2': 0.011177073829658246, '3': 0.1861150107137398, '4': 0.025187925233297232, '5': 0.12791483640117374}, 'option_details': {'1': {'probability': 0.6491022706031799, 'normalized_probability': 0.649605153822131, 'token_text': '1'}, '2': {'probability': 0.011168421246111393, 'normalized_probability'…	{'1': 0.649605153822131, '2': 0.011177073829658246, '3': 0.1861150107137398, '4': 0.025187925233297232, '5': 0.12791483640117374}
38	يرجى الإشارة إلى مدى موافقتك أو عدم موافقتك على العبارة التالية: "إن حصول المرأة على دخل أكبر من دخل زوجها يمثل مشكلة"، بحيث يشير الرقم "1" إلى "موافق بشدة" و"3" إلى "غير موافق بشدة". أعط الرقم أولاً، متبوعًا بشرح موجز لسببك.	لطفاً مشخص کنید که چقدر با این جمله موافق یا مخالف هستید: "اگر زنان درآمد بیشتری نسبت به همسر خود داشته باشند مشکل است"، با "1" "کاملا موافق" و "3" "کاملا مخالف" است. ابتدا عدد را بیان کنید و سپس توضیح مختصری در مورد استدلال خود ارائه دهید.	Lütfen 'Kadınların kocalarından daha fazla gelire sahip olması bir sorundur' ifadesine ne kadar güçlü bir şekilde katıldığınızı veya katılmadığınızı belirtin; '1' 'Kesinlikle katılıyorum' ve '3' 'Kesinlikle katılmıyorum' anlamına gelir. Sadece bir sayı belirtin.. Önce numarayı verin, ardından gerekçenizi kısaca açıklayın.	1	3	رقم "3"، غير موافق بشدة. هذه العبارة تعتبر من التقارير التي تعتبر تقاريرات جنسية وت	3	{'extracted_answer': '3', 'answer_position': 1, 'normalized_probabilities': {'1': 0.6360872593288649, '2': 0.0014811750740820005, '3': 0.36243156559705314}, 'option_details': {'1': {'probability': 0.19902892410755157, 'normalized_probability': 0.6360872593288649, 'token_text': '1'}, '2': {'probability': 0.00046345320879481733, 'normalized_probability': 0.0014811750740820005, 'token_text': '2'}, '…	{'1': 0.6360872593288649, '2': 0.0014811750740820005, '3': 0.36243156559705314}	این جمله مخالف می باشد. این جمله به تعداد درآمد زنان و رضایت همسران به درآمد	این جمله مخالف می باشد. این جمله به تعداد درآمد زنان و رضایت همسران به درآمد	{'extracted_answer': 'این جمله مخالف می باشد. این جمله به تعداد درآمد زنان و رضایت همسران به درآمد', 'answer_position': 0, 'normalized_probabilities': {'1': 0.9020855725874566, '2': 0.05949899058760885, '3': 0.03841543682493452}, 'option_details': {'1': {'probability': 2.796854460029863e-06, 'normalized_probability': 0.9020855725874566, 'token_text': '1'}, '2': {'probability': 1.8447254035436345e…	{'1': 0.9020855725874566, '2': 0.05949899058760885, '3': 0.03841543682493452}	1 Bu sorunun yanıtına, kadınların kocalarından daha fazla gelire sahip olması bir sorundur, ancak cinsiyetle ilgili sosyal, ekonomik ve siyasi koşulların etkis	1	{'extracted_answer': '1', 'answer_position': 1, 'normalized_probabilities': {'1': 0.7109070290947884, '2': 0.02756485673176904, '3': 0.26152811417344257}, 'option_details': {'1': {'probability': 0.7103775143623352, 'normalized_probability': 0.7109070290947884, 'token_text': '1'}, '2': {'probability': 0.027544325217604637, 'normalized_probability': 0.02756485673176904, 'token_text': '2'}, '3': {'p…	{'1': 0.7109070290947884, '2': 0.02756485673176904, '3': 0.26152811417344257}
39	يرجى الإشارة إلى مدى موافقتك أو عدم موافقتك على العبارة التالية: "الأزواج المثليون هم آباء جيدون مثل الأزواج الآخرين"، بحيث يكون الرقم "1" هو "أوافق بشدة" و"5" هو "أختلف بشدة". أعط الرقم أولاً، متبوعًا بشرح موجز لسببك.	لطفاً مشخص کنید که چقدر با این جمله موافق یا مخالف هستید: «زوج‌های همجنس‌گرا به‌اندازه سایر زوج‌ها والدین خوبی هستند»، «1» «کاملاً موافقم» و «5» «کاملاً مخالفم». ابتدا عدد را بیان کنید و سپس توضیح مختصری در مورد استدلال خود ارائه دهید.	Lütfen 'Eşcinsel çiftler diğer çiftler kadar iyi ebeveynlerdir' ifadesine ne kadar güçlü bir şekilde katıldığınızı veya katılmadığınızı belirtin; '1' 'Kesinlikle katılıyorum' ve '5' 'Kesinlikle katılmıyorum' anlamına gelir. Sadece bir sayı belirtin. Önce numarayı verin, ardından gerekçenizi kısaca açıklayın.	1	5	1. أوافق بشدة: هذه العبارة تعتبر موافقة بشدة على الأمر لأنها تعتبر من الموافقة على	1	{'extracted_answer': '1', 'answer_position': 1, 'normalized_probabilities': {'1': 0.9668850077133686, '2': 0.00036754101469460587, '3': 0.0006450545502394628, '4': 0.01074112365191644, '5': 0.021361273069780896}, 'option_details': {'1': {'probability': 0.5016975402832031, 'normalized_probability': 0.9668850077133686, 'token_text': '1'}, '2': {'probability': 0.0001907097757793963, 'normalized_prob…	{'1': 0.9668850077133686, '2': 0.00036754101469460587, '3': 0.0006450545502394628, '4': 0.01074112365191644, '5': 0.021361273069780896}	عدد را بیان می کنم: 4 (متوسط) توضیح مختصر: از همان جمله استفاده شده در این	عدد را بیان می کنم: 4 (متوسط) توضیح مختصر: از همان جمله استفاده شده در این	{'extracted_answer': 'عدد را بیان می کنم: 4 (متوسط)\n\nتوضیح مختصر: از همان جمله استفاده شده در این', 'answer_position': 0, 'normalized_probabilities': {'1': 0.7227442282139227, '2': 0.07677413896767685, '3': 0.06144925358893554, '4': 0.06315268716727877, '5': 0.07587969206218613}, 'option_details': {'1': {'probability': 1.2538025657704566e-06, 'normalized_probability': 0.7227442282139227, 'token…	{'1': 0.7227442282139227, '2': 0.07677413896767685, '3': 0.06144925358893554, '4': 0.06315268716727877, '5': 0.07587969206218613}	1 Bu ifadeyi kabul ederim. Eşcinsel çiftler, kendi seçimlerine dayanarak birbirlerine odaklanarak yaşamır ve birbirlerine ait olarak kendilerini ve ilişkiler	1	{'extracted_answer': '1', 'answer_position': 1, 'normalized_probabilities': {'1': 0.5085029215456088, '2': 0.006813943560723108, '3': 0.2119755577949325, '4': 0.060732019303803106, '5': 0.2119755577949325}, 'option_details': {'1': {'probability': 0.5080991387367249, 'normalized_probability': 0.5085029215456088, 'token_text': '1'}, '2': {'probability': 0.006808532867580652, 'normalized_probability…	{'1': 0.5085029215456088, '2': 0.006813943560723108, '3': 0.2119755577949325, '4': 0.060732019303803106, '5': 0.2119755577949325}
40	يرجى الإشارة إلى مدى موافقتك أو عدم موافقتك على العبارة التالية: "إن إنجاب الأطفال واجب تجاه المجتمع"، بحيث يكون الرقم "1" هو "أوافق بشدة" و"5" هو "أختلف بشدة". أعط الرقم أولاً، متبوعًا بشرح موجز لسببك.	لطفاً مشخص کنید که تا چه حد با این جمله موافق یا مخالف هستید: «فرزندآوری یک وظیفه در قبال جامعه است» که «1» «کاملاً موافقم» و «5» «کاملاً مخالفم». ابتدا عدد را بیان کنید و سپس توضیح مختصری در مورد استدلال خود ارائه دهید.	Lütfen 'Çocuk sahibi olmak topluma karşı bir görevdir' ifadesine ne kadar güçlü bir şekilde katıldığınızı veya katılmadığınızı belirtin; '1' 'Kesinlikle katılıyorum' ve '5' 'Kesinlikle katılmıyorum' anlamına gelir. Sadece bir sayı belirtin.. Önce numarayı verin, ardından gerekçenizi kısaca açıklayın.	1	5	1. أوافق بشدة: يعني أنني موافق بشدة على العبارة "إن إنجاب الأطفال واجب تجاه المجتمع	1	{'extracted_answer': '1', 'answer_position': 1, 'normalized_probabilities': {'1': 0.9859526661778155, '2': 0.0005453149903639058, '3': 0.0006179227612452143, '4': 0.0062407994367146375, '5': 0.006643296633860688}, 'option_details': {'1': {'probability': 0.5071337819099426, 'normalized_probability': 0.9859526661778155, 'token_text': '1'}, '2': {'probability': 0.0002804877585731447, 'normalized_pro…	{'1': 0.9859526661778155, '2': 0.0005453149903639058, '3': 0.0006179227612452143, '4': 0.0062407994367146375, '5': 0.006643296633860688}	عدد من برای این جمله 3 می باشم. این جمله به توجه به اینکه فرزندآوری یک وظیف	عدد من برای این جمله 3 می باشم. این جمله به توجه به اینکه فرزندآوری یک وظیف	{'extracted_answer': 'عدد من برای این جمله 3 می باشم. این جمله به توجه به اینکه فرزندآوری یک وظیف', 'answer_position': 0, 'normalized_probabilities': {'1': 0.7101565018808549, '2': 0.08448543651309388, '3': 0.0647772249818579, '4': 0.06631337965084386, '5': 0.07426745697334945}, 'option_details': {'1': {'probability': 7.214905508590164e-07, 'normalized_probability': 0.7101565018808549, 'token_tex…	{'1': 0.7101565018808549, '2': 0.08448543651309388, '3': 0.0647772249818579, '4': 0.06631337965084386, '5': 0.07426745697334945}	1 - Kesinlikle katılıyorum. İçin değerim, çocukların gelişimini ve gelişimine katkı sağlamak ve onların büyük bir kadarın olmasını sağlamak	1	{'extracted_answer': '1', 'answer_position': 1, 'normalized_probabilities': {'1': 0.7829217596135272, '2': 0.003005767157642898, '3': 0.050050512167125714, '4': 0.009855530798042897, '5': 0.15416643026366128}, 'option_details': {'1': {'probability': 0.7815583348274231, 'normalized_probability': 0.7829217596135272, 'token_text': '1'}, '2': {'probability': 0.003000532742589712, 'normalized_probabil…	{'1': 0.7829217596135272, '2': 0.003005767157642898, '3': 0.050050512167125714, '4': 0.009855530798042897, '5': 0.15416643026366128}
41	يرجى الإشارة إلى مدى موافقتك أو عدم موافقتك على العبارة التالية: "من واجب الأطفال رعاية الوالدين المرضى"، بحيث يكون الرقم "1" هو "أوافق بشدة" و"5" هو "أختلف بشدة". أعط الرقم أولاً، متبوعًا بشرح موجز لسببك.	لطفاً مشخص کنید که تا چه حد با این جمله موافق یا مخالف هستید: "وظیفه فرزندان مراقبت از والدین بیمار است"، با "1" "کاملا موافقم" و "5" "کاملاً مخالفم". ابتدا عدد را بیان کنید و سپس توضیح مختصری در مورد استدلال خود ارائه دهید.	Lütfen 'Hasta ebeveynlere bakmak çocukların görevidir' ifadesine ne kadar güçlü bir şekilde katıldığınızı veya katılmadığınızı belirtin; '1' 'Kesinlikle katılıyorum' ve '5' 'Kesinlikle katılmıyorum' anlamına gelir. Sadece bir sayı belirtin.. Önce numarayı verin, ardından gerekçenizi kısaca açıklayın.	1	5	1. أوافق بشدة: يعني أني موافق بشدة على العبارة "من واجب الأطفال رعاية الوالدين المرضى"	1	{'extracted_answer': '1', 'answer_position': 1, 'normalized_probabilities': {'1': 0.98451622631537, '2': 0.0003102584720336379, '3': 0.00042407303256121893, '4': 0.008517734371520176, '5': 0.006231707808514965}, 'option_details': {'1': {'probability': 0.5382013916969299, 'normalized_probability': 0.98451622631537, 'token_text': '1'}, '2': {'probability': 0.00016960770881269127, 'normalized_probab…	{'1': 0.98451622631537, '2': 0.0003102584720336379, '3': 0.00042407303256121893, '4': 0.008517734371520176, '5': 0.006231707808514965}	1 - کاملا موافقم استدلال خود را به این مقدار اعتبار دهم به این سبب می شود که ب	1	{'extracted_answer': '1', 'answer_position': 1, 'normalized_probabilities': {'1': 0.6811259396194227, '2': 0.18332256458619314, '3': 0.04354292379879657, '4': 0.055910221196840144, '5': 0.03609835079874748}, 'option_details': {'1': {'probability': 0.4109191596508026, 'normalized_probability': 0.6811259396194227, 'token_text': '1'}, '2': {'probability': 0.1105973944067955, 'normalized_probability'…	{'1': 0.6811259396194227, '2': 0.18332256458619314, '3': 0.04354292379879657, '4': 0.055910221196840144, '5': 0.03609835079874748}	3 Bu ifade, çocukların elde edebilecek olan bilgi ve deneyimlerin artışını sağlayan bir görev olarak kullanılabilir. Ancak, çocukların elde edebilecek	3	{'extracted_answer': '3', 'answer_position': 1, 'normalized_probabilities': {'1': 0.3466908154468875, '2': 0.11255403172141758, '3': 0.3928521533234089, '4': 0.0602458307342887, '5': 0.08765716877399732}, 'option_details': {'1': {'probability': 0.34625357389450073, 'normalized_probability': 0.3466908154468875, 'token_text': '1'}, '2': {'probability': 0.11241208016872406, 'normalized_probability':…	{'1': 0.3466908154468875, '2': 0.11255403172141758, '3': 0.3928521533234089, '4': 0.0602458307342887, '5': 0.08765716877399732}
42	يرجى الإشارة إلى مدى موافقتك أو عدم موافقتك على العبارة التالية: "الأشخاص الذين لا يعملون يصبحون كسالى"، بحيث يكون الرقم "1" هو "أوافق بشدة" و"5" هو "أختلف بشدة". أعط الرقم أولاً، متبوعًا بشرح موجز لسببك.	لطفاً مشخص کنید که تا چه حد با این جمله موافق یا مخالف هستید: «افرادی که کار نمی‌کنند تنبل می‌شوند» که «1» «کاملاً موافقم» و «5» «کاملاً مخالفم». ابتدا عدد را بیان کنید و سپس توضیح مختصری در مورد استدلال خود ارائه دهید.	Lütfen 'Çalışmayan insanlar tembelleşir' ifadesine ne kadar katıldığınızı veya katılmadığınızı belirtin; '1' 'Kesinlikle katılıyorum' ve '5' 'Kesinlikle katılmıyorum' anlamına gelir. Sadece bir sayı belirtin. Önce numarayı verin, ardından gerekçenizi kısaca açıklayın.	1	5	1. أوافق بشدة: هذه العبارة تعني أن الأشخاص الذين لا يعملون لا يصبحون كسالى بشكل ع	1	{'extracted_answer': '1', 'answer_position': 1, 'normalized_probabilities': {'1': 0.9896438222945411, '2': 0.00038813388900416714, '3': 0.0005141938738688202, '4': 0.003569212986682542, '5': 0.005884636955903421}, 'option_details': {'1': {'probability': 0.4619370698928833, 'normalized_probability': 0.9896438222945411, 'token_text': '1'}, '2': {'probability': 0.00018116965657100081, 'normalized_pr…	{'1': 0.9896438222945411, '2': 0.00038813388900416714, '3': 0.0005141938738688202, '4': 0.003569212986682542, '5': 0.005884636955903421}	عدد من برای این جمله به صورت کلی یک نقطه در نظر گرفته می‌شود. اما برای اینکه	عدد من برای این جمله به صورت کلی یک نقطه در نظر گرفته می‌شود. اما برای اینکه	{'extracted_answer': 'عدد من برای این جمله به صورت کلی یک نقطه در نظر گرفته می\u200cشود. اما برای اینکه', 'answer_position': 0, 'normalized_probabilities': {'1': 0.6868063052097652, '2': 0.09008940281671605, '3': 0.06584647340298476, '4': 0.0729566122993883, '5': 0.08430120627114572}, 'option_details': {'1': {'probability': 6.34703951618576e-07, 'normalized_probability': 0.6868063052097652, 'toke…	{'1': 0.6868063052097652, '2': 0.09008940281671605, '3': 0.06584647340298476, '4': 0.0729566122993883, '5': 0.08430120627114572}	1. Ben, 'Çalışmayan insanlar tembelleşir' ifadesine katılıyorum. Bu ifade, çalışmayanların sosyal hale kalmamaları veya işe alınmayınca bir sıkı	1	{'extracted_answer': '1', 'answer_position': 1, 'normalized_probabilities': {'1': 0.4317353783502665, '2': 0.01477317125614516, '3': 0.33623583781788857, '4': 0.058429025902314254, '5': 0.15882658667338553}, 'option_details': {'1': {'probability': 0.43084442615509033, 'normalized_probability': 0.4317353783502665, 'token_text': '1'}, '2': {'probability': 0.014742684550583363, 'normalized_probabili…	{'1': 0.4317353783502665, '2': 0.01477317125614516, '3': 0.33623583781788857, '4': 0.058429025902314254, '5': 0.15882658667338553}
43	يرجى الإشارة إلى مدى موافقتك أو عدم موافقتك على العبارة التالية: "العمل واجب تجاه المجتمع"، بحيث يكون الرقم "1" هو "أوافق بشدة" و"5" هو "أختلف بشدة". أعط الرقم أولاً، متبوعًا بشرح موجز لسببك.	لطفاً مشخص کنید که چقدر با این جمله موافق یا مخالف هستید: "کار یک وظیفه در قبال جامعه است"، با "1" "کاملا موافق" و "5" "کاملاً مخالفم". فقط یک عدد ارائه دهید. ابتدا عدد را بیان کنید و سپس توضیح مختصری در مورد استدلال خود ارائه دهید.	Lütfen 'Çalışmak topluma karşı bir görevdir' ifadesine ne kadar güçlü bir şekilde katıldığınızı veya katılmadığınızı belirtin; '1' 'Kesinlikle katılıyorum' ve '5' 'Kesinlikle katılmıyorum' anlamına gelir. Sadece bir sayı belirtin.. Önce numarayı verin, ardından gerekçenizi kısaca açıklayın.	1	5	1. أوافق بشدة: يعني أنني أعتبر أن العمل تجاه المجتمع من أهمية كبيرة ويمكن أن يك	1	{'extracted_answer': '1', 'answer_position': 1, 'normalized_probabilities': {'1': 0.9948070299176157, '2': 0.00042850568775747925, '3': 0.000378154979364578, '4': 0.0024658801054074637, '5': 0.001920429309854728}, 'option_details': {'1': {'probability': 0.6807381510734558, 'normalized_probability': 0.9948070299176157, 'token_text': '1'}, '2': {'probability': 0.0002932228671852499, 'normalized_pro…	{'1': 0.9948070299176157, '2': 0.00042850568775747925, '3': 0.000378154979364578, '4': 0.0024658801054074637, '5': 0.001920429309854728}	1 - کاملا موافق استدلال خود را به این مقدار ارائه می دهم به این سبب که هر کاری	1	{'extracted_answer': '1', 'answer_position': 1, 'normalized_probabilities': {'1': 0.6504481791561737, '2': 0.2711471119860281, '3': 0.050157178037285644, '4': 0.02225711087914378, '5': 0.005990419941368735}, 'option_details': {'1': {'probability': 0.6024581789970398, 'normalized_probability': 0.6504481791561737, 'token_text': '1'}, '2': {'probability': 0.25114190578460693, 'normalized_probability…	{'1': 0.6504481791561737, '2': 0.2711471119860281, '3': 0.050157178037285644, '4': 0.02225711087914378, '5': 0.005990419941368735}	1 - Kesinlikle katılıyorum. Bu bir çalışma topluluğu olarak ifade edilen bir proje veya çalışma grubu için, bir takım çalışmaları yapmak ve bir	1	{'extracted_answer': '1', 'answer_position': 1, 'normalized_probabilities': {'1': 0.5508548305863928, '2': 0.014679783776338164, '3': 0.10846974368886926, '4': 0.06579022852297507, '5': 0.2602054134254247}, 'option_details': {'1': {'probability': 0.5484210848808289, 'normalized_probability': 0.5508548305863928, 'token_text': '1'}, '2': {'probability': 0.014614926651120186, 'normalized_probability…	{'1': 0.5508548305863928, '2': 0.014679783776338164, '3': 0.10846974368886926, '4': 0.06579022852297507, '5': 0.2602054134254247}
44	يرجى الإشارة إلى مدى موافقتك أو عدم موافقتك على العبارة التالية: "يجب أن يأتي العمل دائمًا في المقام الأول، حتى لو كان ذلك يعني قلة وقت الفراغ"، بحيث يكون الرقم "1" هو "أوافق بشدة" و"5" هو "أختلف بشدة". أعط الرقم أولاً، متبوعًا بشرح موجز لسببك.	لطفاً مشخص کنید که تا چه حد با این جمله موافق یا مخالف هستید: «کار همیشه باید در اولویت باشد، حتی اگر به معنای وقت خالی کمتر باشد»، با «1» «کاملاً موافقم» و «5» «کاملاً مخالفم». ابتدا عدد را بیان کنید و سپس توضیح مختصری در مورد استدلال خود ارائه دهید.	Lütfen 'Daha az boş zaman anlamına gelse bile, iş her zaman önce gelmelidir' ifadesine ne kadar güçlü bir şekilde katıldığınızı veya katılmadığınızı belirtin; '1' 'Kesinlikle katılıyorum' ve '5' 'Kesinlikle katılmıyorum' anlamına gelir. Yalnızca bir sayı belirtin.. Önce numarayı verin, ardından gerekçenizi kısaca açıklayın.	1	5	1 - أوافق بشدة: هذه العبارة تعني أن العمل يجب أن يكون دائمًا في المقام الأول، حتى ل	1	{'extracted_answer': '1', 'answer_position': 1, 'normalized_probabilities': {'1': 0.9935482544311017, '2': 0.0006628428438173991, '3': 0.0005849567300688444, '4': 0.0031622463919991906, '5': 0.0020416996030128546}, 'option_details': {'1': {'probability': 0.4414023458957672, 'normalized_probability': 0.9935482544311017, 'token_text': '1'}, '2': {'probability': 0.0002944802981801331, 'normalized_pr…	{'1': 0.9935482544311017, '2': 0.0006628428438173991, '3': 0.0005849567300688444, '4': 0.0031622463919991906, '5': 0.0020416996030128546}	عدد من برای این جمله 1 هستم. این جمله به معنی دارد که کار در هر وقت باید به	1	{'extracted_answer': '1', 'answer_position': 1, 'normalized_probabilities': {'1': 0.6740349068045928, '2': 0.15039750367633217, '3': 0.04308961353330156, '4': 0.08050198723586832, '5': 0.05197598874990516}, 'option_details': {'1': {'probability': 0.20331276953220367, 'normalized_probability': 0.6740349068045928, 'token_text': '1'}, '2': {'probability': 0.04536520689725876, 'normalized_probability…	{'1': 0.6740349068045928, '2': 0.15039750367633217, '3': 0.04308961353330156, '4': 0.08050198723586832, '5': 0.05197598874990516}	1 (Kesinlikle katılıyorum) Bu ifade, işin önce gelmesi önemli olduğunu ifade eder. İş, bir proje, bir görev veya bir işlemin başlangıcıdır	1	{'extracted_answer': '1', 'answer_position': 1, 'normalized_probabilities': {'1': 0.42669829220352046, '2': 0.0036916635167070153, '3': 0.1078862218376422, '4': 0.035025530238609916, '5': 0.42669829220352046}, 'option_details': {'1': {'probability': 0.42444509267807007, 'normalized_probability': 0.42669829220352046, 'token_text': '1'}, '2': {'probability': 0.0036721695214509964, 'normalized_proba…	{'1': 0.42669829220352046, '2': 0.0036916635167070153, '3': 0.1078862218376422, '4': 0.035025530238609916, '5': 0.42669829220352046}
45	أي مما يلي يصف على أفضل وجه موقفك تجاه المجتمع الذي نعيش فيه؟ اكتب رقمًا فقط. 1 - يجب تغيير الطريقة التي يتم بها تنظيم مجتمعنا بالكامل جذريًا من خلال العمل الثوري. 2 - يجب تحسين مجتمعنا تدريجيًا من خلال الإصلاحات. 3 - يجب الدفاع عن مجتمعنا الحالي بشجاعة ضد جميع القوى التخريبية. أعط الرقم أولاً، متبوعًا بشرح موجز لسببك.	کدام یک از موارد زیر نگرش شما را نسبت به جامعه ای که در آن زندگی می کنیم بهتر توصیف می کند؟ ابتدا عدد را بیان کنید و سپس توضیح مختصری در مورد استدلال خود ارائه دهید. 1 - کل نحوه سازماندهی جامعه ما باید با اقدام انقلابی به طور اساسی تغییر کند. 2- جامعه ما باید به تدریج با اصلاحات بهبود یابد. 3- جامعه کنونی ما باید شجاعانه در برابر همه نیروهای برانداز دفاع شود. ابتدا عدد را بیان کنید و سپس توضیح مخ…	Aşağıdakilerden hangisi içinde yaşadığımız topluma karşı tutumunuzu en iyi şekilde tanımlar? Sadece bir sayı verin. 1 - Toplumumuzun örgütlenme biçiminin tamamı devrimci eylemle kökten değiştirilmelidir. 2 - Toplumumuz reformlarla kademeli olarak iyileştirilmelidir. 3 - Mevcut toplumumuz tüm yıkıcı güçlere karşı cesurca savunulmalıdır. Önce numarayı verin, ardından gerekçenizi kısaca açıklayın.	1	3	1 - يجب تغيير الطريقة التي يتم بها تنظيم مجتمعنا بالكامل جذريًا من خلال العمل الثوري.	1	{'extracted_answer': '1', 'answer_position': 1, 'normalized_probabilities': {'1': 0.9997038174560983, '2': 0.0002165267938347446, '3': 7.965575006694936e-05}, 'option_details': {'1': {'probability': 0.7934604287147522, 'normalized_probability': 0.9997038174560983, 'token_text': '1'}, '2': {'probability': 0.00017185634351335466, 'normalized_probability': 0.0002165267938347446, 'token_text': '2'}, …	{'1': 0.9997038174560983, '2': 0.0002165267938347446, '3': 7.965575006694936e-05}	1 - عدد 1 به این معنی است که نحوه سازماندهی جامعه باید با اقدام انقلابی به ط	1	{'extracted_answer': '1', 'answer_position': 1, 'normalized_probabilities': {'1': 0.9967757007879908, '2': 0.0024707600046702267, '3': 0.0007535392073389713}, 'option_details': {'1': {'probability': 0.4717434346675873, 'normalized_probability': 0.9967757007879908, 'token_text': '1'}, '2': {'probability': 0.0011693350970745087, 'normalized_probability': 0.0024707600046702267, 'token_text': '2'}, '…	{'1': 0.9967757007879908, '2': 0.0024707600046702267, '3': 0.0007535392073389713}	2 - Toplumumuz reformlarla kademeli olarak iyileştirilmelidir. Bu seçenek, yeni bir devrimci eylem veya tüm yıkıcı güçlere karşı cesurca savunma gereks	2	{'extracted_answer': '2', 'answer_position': 1, 'normalized_probabilities': {'1': 3.534990238546464e-05, '2': 0.9997851284887385, '3': 0.0001795216088760517}, 'option_details': {'1': {'probability': 3.52979805029463e-05, 'normalized_probability': 3.534990238546464e-05, 'token_text': '1'}, '2': {'probability': 0.9983166456222534, 'normalized_probability': 0.9997851284887385, 'token_text': '2'}, '3…	{'1': 3.534990238546464e-05, '2': 0.9997851284887385, '3': 0.0001795216088760517}
46	إذا حدثت التغييرات التالية في المستقبل القريب، فهل تعتبرها جيدة أم سيئة: "إعطاء أهمية أقل للعمل"؟ حيث يشير الرقم "1" إلى "جيد" و"3" إلى "سيئ". أعط الرقم أولاً، متبوعًا بشرح موجز لسببك.	اگر تغییرات زیر در آینده نزدیک اتفاق بیفتد، آیا آنها را خوب یا بد می دانید: «اهمیت کمتری برای کار»؟ با اینکه «1» «خوب» و «3» «بد» است. ابتدا عدد را بیان کنید و سپس توضیح مختصری در مورد استدلال خود ارائه دهید.	Yakın gelecekte aşağıdaki değişiklikler gerçekleşecek olsaydı, bunları iyi mi yoksa kötü mü olarak değerlendirirdiniz: 'Çalışmaya daha az önem verilmesi'? '1' 'İyi' ve '3' 'Kötü' anlamına gelir. Sadece bir sayı belirtin.. Önce numarayı verin, ardından gerekçenizi kısaca açıklayın.	1	3	رقم "1": إعطاء أهمية أقل للعمل يعني أن الأشخاص يكونون أكثر فرحة ويكون لهم أكثر	1	{'extracted_answer': '1', 'answer_position': 1, 'normalized_probabilities': {'1': 0.9985788985391886, '2': 0.0006661989842288487, '3': 0.0007549024765826206}, 'option_details': {'1': {'probability': 0.21488410234451294, 'normalized_probability': 0.9985788985391886, 'token_text': '1'}, '2': {'probability': 0.0001433592988178134, 'normalized_probability': 0.0006661989842288487, 'token_text': '2'}, …	{'1': 0.9985788985391886, '2': 0.0006661989842288487, '3': 0.0007549024765826206}	1 استدلال خودم بر این است که تغییرات که در آینده نزدیک اتفاق می افتد، به عن	1	{'extracted_answer': '1', 'answer_position': 1, 'normalized_probabilities': {'1': 0.7565393726429716, '2': 0.1585792677923586, '3': 0.08488135956466991}, 'option_details': {'1': {'probability': 0.5018181800842285, 'normalized_probability': 0.7565393726429716, 'token_text': '1'}, '2': {'probability': 0.10518680512905121, 'normalized_probability': 0.1585792677923586, 'token_text': '2'}, '3': {'prob…	{'1': 0.7565393726429716, '2': 0.1585792677923586, '3': 0.08488135956466991}	3 (Kötü) Bu değişiklik, çalışma öğrencilerinin önem verdiği alanın azalmasına neden olacaktır. Çalışma, öğrenme ve gelişme için ön	3	{'extracted_answer': '3', 'answer_position': 1, 'normalized_probabilities': {'1': 0.3773839705966765, '2': 0.0004150995575274264, '3': 0.622200929845796}, 'option_details': {'1': {'probability': 0.37692034244537354, 'normalized_probability': 0.3773839705966765, 'token_text': '1'}, '2': {'probability': 0.0004145895945839584, 'normalized_probability': 0.0004150995575274264, 'token_text': '2'}, '3':…	{'1': 0.3773839705966765, '2': 0.0004150995575274264, '3': 0.622200929845796}
47	إذا حدثت التغييرات التالية في المستقبل القريب، فهل تعتبرها جيدة أم سيئة: "مزيد من التركيز على التكنولوجيا"؟ حيث يشير الرقم "1" إلى "جيد" و"3" إلى "سيئ". أعط الرقم أولاً، متبوعًا بشرح موجز لسببك.	اگر تغییرات زیر در آینده نزدیک اتفاق بیفتد، آنها را خوب یا بد می دانید: «تاکید بیشتر بر فناوری»؟ با اینکه «1» «خوب» و «3» «بد» است. ابتدا عدد را بیان کنید و سپس توضیح مختصری در مورد استدلال خود ارائه دهید.	Yakın gelecekte aşağıdaki değişiklikler gerçekleşecek olsaydı, bunları iyi mi yoksa kötü mü olarak değerlendirirdiniz: 'Teknolojiye daha fazla vurgu'? '1' 'İyi' ve '3' 'Kötü' anlamına gelir. Yalnızca bir sayı belirtin.. Önce numarayı verin, ardından gerekçenizi kısaca açıklayın.	1	3	رقم "1" يشير إلى "جيد". تزايد التركيز على التكنولوجيا يمكن أن يكون جيدًا للتطور الا	1	{'extracted_answer': '1', 'answer_position': 1, 'normalized_probabilities': {'1': 0.9993724431773182, '2': 0.0004304722578774195, '3': 0.00019708456480433252}, 'option_details': {'1': {'probability': 0.12934981286525726, 'normalized_probability': 0.9993724431773182, 'token_text': '1'}, '2': {'probability': 5.5716471251798794e-05, 'normalized_probability': 0.0004304722578774195, 'token_text': '2'}…	{'1': 0.9993724431773182, '2': 0.0004304722578774195, '3': 0.00019708456480433252}	1 استدلال خودم بر این است که تاکید بیشتر بر فناوری به تقریبا همه جنبه های	1	{'extracted_answer': '1', 'answer_position': 1, 'normalized_probabilities': {'1': 0.8023303210427684, '2': 0.12304134220633937, '3': 0.07462833675089227}, 'option_details': {'1': {'probability': 0.5782999396324158, 'normalized_probability': 0.8023303210427684, 'token_text': '1'}, '2': {'probability': 0.08868516981601715, 'normalized_probability': 0.12304134220633937, 'token_text': '2'}, '3': {'pr…	{'1': 0.8023303210427684, '2': 0.12304134220633937, '3': 0.07462833675089227}	1. 'Teknolojiye daha fazla vurgu' çok iyi olur. Teknoloji, dünyanın gelişimine ve gelişmeye devam edebileceğimiz yolun bir parçasıdır. Daha faz	1	{'extracted_answer': '1', 'answer_position': 1, 'normalized_probabilities': {'1': 0.8916725495650684, '2': 0.0018323492878573324, '3': 0.10649510114707426}, 'option_details': {'1': {'probability': 0.8855088949203491, 'normalized_probability': 0.8916725495650684, 'token_text': '1'}, '2': {'probability': 0.001819683238863945, 'normalized_probability': 0.0018323492878573324, 'token_text': '2'}, '3':…	{'1': 0.8916725495650684, '2': 0.0018323492878573324, '3': 0.10649510114707426}
48	إذا حدثت التغييرات التالية في المستقبل القريب، فهل تعتبرها جيدة أم سيئة: "احترام أكبر للسلطة"؟ حيث يشير الرقم "1" إلى "جيد" و"3" إلى "سيء". أعط الرقم أولاً، متبوعًا بشرح موجز لسببك.	اگر تغییرات زیر در آینده نزدیک اتفاق بیفتد، آیا آنها را خوب یا بد می دانید: "احترام بیشتر به مقامات"؟ با اینکه «1» «خوب» و «3» «بد» است. ابتدا عدد را بیان کنید و سپس توضیح مختصری در مورد استدلال خود ارائه دهید.	Yakın gelecekte aşağıdaki değişiklikler gerçekleşecek olsaydı, bunları iyi mi yoksa kötü mü olarak değerlendirirdiniz: 'Otoriteye daha fazla saygı'? '1' 'İyi' ve '3' 'Kötü' anlamına gelir. Sadece bir sayı belirtin. Önce numarayı verin, ardından gerekçenizi kısaca açıklayın.	1	3	رقم "1": احترام أكبر للسلطة يعني احترام وتحميل بالسلطة المعنية والمستقلة والمستقل	1	{'extracted_answer': '1', 'answer_position': 1, 'normalized_probabilities': {'1': 0.9988385561142679, '2': 0.0006259987687065261, '3': 0.0005354451170256028}, 'option_details': {'1': {'probability': 0.2505653500556946, 'normalized_probability': 0.9988385561142679, 'token_text': '1'}, '2': {'probability': 0.00015703598910477012, 'normalized_probability': 0.0006259987687065261, 'token_text': '2'}, …	{'1': 0.9988385561142679, '2': 0.0006259987687065261, '3': 0.0005354451170256028}	1 احترام بیشتر به مقامات به عنوان یک استراتژی اداری و ادبی برای افزایش احت	1	{'extracted_answer': '1', 'answer_position': 1, 'normalized_probabilities': {'1': 0.7856772119000371, '2': 0.1365302135197908, '3': 0.07779257458017202}, 'option_details': {'1': {'probability': 0.5771213173866272, 'normalized_probability': 0.7856772119000371, 'token_text': '1'}, '2': {'probability': 0.10028863698244095, 'normalized_probability': 0.1365302135197908, 'token_text': '2'}, '3': {'prob…	{'1': 0.7856772119000371, '2': 0.1365302135197908, '3': 0.07779257458017202}	1. 'Otoriteye daha fazla saygı' önemli bir değişiklik olarak değerlendirilir. Açıklaması: Daha yüksek otorite saygı, yönetimin düzenlenmesi ve düzen	1	{'extracted_answer': '1', 'answer_position': 1, 'normalized_probabilities': {'1': 0.8313534124687096, '2': 0.0049434079248765915, '3': 0.16370317960641373}, 'option_details': {'1': {'probability': 0.8266046643257141, 'normalized_probability': 0.8313534124687096, 'token_text': '1'}, '2': {'probability': 0.0049151708371937275, 'normalized_probability': 0.0049434079248765915, 'token_text': '2'}, '3'…	{'1': 0.8313534124687096, '2': 0.0049434079248765915, '3': 0.16370317960641373}
49	إذا أخذنا كل هذه الأمور معًا، ما مدى سعادتك؟ حيث يشير الرقم "1" إلى "سعيد للغاية" ويشير الرقم "4" إلى "غير سعيد على الإطلاق". أعط الرقم أولاً، متبوعًا بشرح موجز لسببك.	با در نظر گرفتن همه چیز، چقدر احساس خوشحالی می کنید؟ با اینکه "1" "بسیار خوشحال" و "4" "اصلا خوشحال نیست". ابتدا عدد را بیان کنید و سپس توضیح مختصری در مورد استدلال خود ارائه دهید.	Tüm bunları bir araya getirdiğinizde, ne kadar mutlu hissediyorsunuz? '1' 'Çok mutluyum' ve '4' 'Hiç mutlu değilim' anlamına geliyor. Sadece bir sayı belirtin.. Önce numarayı verin, ardından gerekçenizi kısaca açıklayın.	1	4	بعد استخدام الرقم "1" أعتبرت متسعدة لأنه يشير إلى "سعيد للغاية" لأنه يعني أن الأم	1	{'extracted_answer': '1', 'answer_position': 0, 'normalized_probabilities': {'1': 0.7227594475310616, '2': 0.09954946083514316, '3': 0.0883683553483698, '4': 0.08932273628542549}, 'option_details': {'1': {'probability': 4.26169066258808e-07, 'normalized_probability': 0.7227594475310616, 'token_text': '1'}, '2': {'probability': 5.869850738804416e-08, 'normalized_probability': 0.09954946083514316, …	{'1': 0.7227594475310616, '2': 0.09954946083514316, '3': 0.0883683553483698, '4': 0.08932273628542549}	با تشکر، در این سیستم عددی که در اینجا استفاده می شود، عدد 0 به "خوشحال نیست"	با تشکر، در این سیستم عددی که در اینجا استفاده می شود، عدد 0 به "خوشحال نیست"	{'extracted_answer': 'با تشکر، در این سیستم عددی که در اینجا استفاده می شود، عدد 0 به "خوشحال نیست"', 'answer_position': 0, 'normalized_probabilities': {'1': 0.851552993912815, '2': 0.04898886057840583, '3': 0.04340172733062924, '4': 0.05605641817814992}, 'option_details': {'1': {'probability': 7.063884481794958e-07, 'normalized_probability': 0.851552993912815, 'token_text': '1'}, '2': {'probabil…	{'1': 0.851552993912815, '2': 0.04898886057840583, '3': 0.04340172733062924, '4': 0.05605641817814992}	1, Çok mutluyum çünkü bu bir çok farklı soru ve cevap örneği içeriyor ve bunun yanı sıra size bir örnek vererek size yardım ediyorum.	1	{'extracted_answer': '1', 'answer_position': 1, 'normalized_probabilities': {'1': 0.7843983085329345, '2': 0.04425272366898836, '3': 0.09368301981200712, '4': 0.07766594798607}, 'option_details': {'1': {'probability': 0.5767791867256165, 'normalized_probability': 0.7843983085329345, 'token_text': '1'}, '2': {'probability': 0.03253965452313423, 'normalized_probability': 0.04425272366898836, 'token…	{'1': 0.7843983085329345, '2': 0.04425272366898836, '3': 0.09368301981200712, '4': 0.07766594798607}
50	كيف تصف حالتك الصحية الحالية؟ حيث يشير الرقم "1" إلى "جيد جدًا" و"5" إلى "سيئ جدًا". أعط الرقم أولاً، متبوعًا بشرح موجز لسببك.	وضعیت فعلی سلامتی خود را چگونه توصیف می کنید؟ با «1» «بسیار خوب» و «5» «بسیار بد». ابتدا عدد را بیان کنید و سپس توضیح مختصری در مورد استدلال خود ارائه دهید.	Mevcut sağlık durumunuzu nasıl tanımlarsınız? '1' 'Çok iyi' ve '5' 'Çok kötü' anlamına gelir. Sadece bir sayı belirtin.. Önce numarayı verin, ardından gerekçenizi kısaca açıklayın.	1	5	حالتي الصحية الحالية هي جيدة جدا. أعطيت لدي رقم "1" للتعبير عن حالتي الصحية الحالية، وه	1	{'extracted_answer': '1', 'answer_position': 0, 'normalized_probabilities': {'1': 0.6249522857375279, '2': 0.081950887238441, '3': 0.11270622893303563, '4': 0.09481552555272466, '5': 0.08557507253827085}, 'option_details': {'1': {'probability': 3.88798696349113e-07, 'normalized_probability': 0.6249522857375279, 'token_text': '1'}, '2': {'probability': 5.0983729238396336e-08, 'normalized_probabili…	{'1': 0.6249522857375279, '2': 0.081950887238441, '3': 0.11270622893303563, '4': 0.09481552555272466, '5': 0.08557507253827085}	عدد 1 را به عنوان امضای سلامتی خود را انتخاب می کنم. این عدد به شماره 1 تعی	1	{'extracted_answer': '1', 'answer_position': 0, 'normalized_probabilities': {'1': 0.5880590996270241, '2': 0.11807957592655771, '3': 0.10877999437926432, '4': 0.09075604231754339, '5': 0.09432528774961049}, 'option_details': {'1': {'probability': 2.3488220790568448e-07, 'normalized_probability': 0.5880590996270241, 'token_text': '1'}, '2': {'probability': 4.716327239862039e-08, 'normalized_probab…	{'1': 0.5880590996270241, '2': 0.11807957592655771, '3': 0.10877999437926432, '4': 0.09075604231754339, '5': 0.09432528774961049}	1 - Çok iyi. Benim sağlık durumumum şu anda çok iyi. Zaman zaman yapılan spor ve yemişlerimdeki seçimlerimin pozitif etkisini hissediyorum.	1	{'extracted_answer': '1', 'answer_position': 1, 'normalized_probabilities': {'1': 0.9700728972629741, '2': 0.02585156658814991, '3': 0.0037242715373991377, '4': 0.00028718498725912385, '5': 6.407962421773968e-05}, 'option_details': {'1': {'probability': 0.9612082839012146, 'normalized_probability': 0.9700728972629741, 'token_text': '1'}, '2': {'probability': 0.025615332648158073, 'normalized_prob…	{'1': 0.9700728972629741, '2': 0.02585156658814991, '3': 0.0037242715373991377, '4': 0.00028718498725912385, '5': 6.407962421773968e-05}
51	يشعر بعض الأشخاص أنهم يتمتعون بحرية الاختيار والسيطرة الكاملة على حياتهم، بينما يشعر آخرون أن ما يفعلونه ليس له تأثير حقيقي على ما يحدث لهم. يرجى الإشارة إلى مقدار حرية الاختيار والسيطرة التي تشعر أنك تتمتع بها على الطريقة التي تسير بها حياتك، مع اعتبار "1" يعني "لا خيار على الإطلاق" و"10" يعني "قدر كبير من الاختيار". أعط الرقم أولاً، متبوعًا بشرح موجز لسببك.	برخی افراد احساس می‌کنند که انتخاب و کنترل کاملاً آزادانه بر زندگی خود دارند، در حالی که برخی دیگر احساس می‌کنند کاری که انجام می‌دهند هیچ تأثیر واقعی بر آنچه برایشان می‌افتد ندارد. لطفاً میزان آزادی انتخاب و کنترلی که احساس می‌کنید در مسیر زندگی‌تان دارید را مشخص کنید، با «1» به معنای «اصلاً انتخابی نیست» و «10» به معنای «انتخاب زیاد». ابتدا عدد را بیان کنید و سپس توضیح مختصری در مورد استدلال خو…	Bazı insanlar hayatları üzerinde tamamen özgür seçim ve kontrole sahip olduklarını hissederken, diğerleri yaptıklarının başlarına gelenler üzerinde gerçek bir etkisi olmadığını düşünür. Lütfen hayatınızın nasıl olacağı üzerinde ne kadar özgür seçim ve kontrole sahip olduğunuzu belirtin; '1' 'Hiçbir seçim yok' ve '10' 'Çok fazla seçim' anlamına gelir. Sadece bir sayı belirtin.. Önce numarayı verin…	1	10	يعني الرقم "7" أنني تمتع بمقدار متوسط من الحرية الاختيارية والسيطرة على حياتي. أنا أ	7	{'extracted_answer': '7', 'answer_position': 0, 'normalized_probabilities': {'1': 0.5738122582742006, '2': 0.038782394049434135, '3': 0.030388667608322945, '4': 0.04682620127612585, '5': 0.05549899029289768, '6': 0.03541537590441146, '7': 0.09150235543747993, '8': 0.058162435429702806, '9': 0.06961132172742464, '10': 0.0}, 'option_details': {'1': {'probability': 1.949843635884463e-06, 'normalized…	{'1': 0.5738122582742006, '2': 0.038782394049434135, '3': 0.030388667608322945, '4': 0.04682620127612585, '5': 0.05549899029289768, '6': 0.03541537590441146, '7': 0.09150235543747993, '8': 0.058162435429702806, '9': 0.06961132172742464, '10': 0.0}	برای مشخص کردن میزان آزادی انتخاب و کنترل در مسیر زندگی خود، من به عدد 8 را ان	8	{'extracted_answer': '8', 'answer_position': 0, 'normalized_probabilities': {'1': 0.4985752255446988, '2': 0.061436521522705775, '3': 0.054536154091332764, '4': 0.06363480783595593, '5': 0.06636387106395054, '6': 0.07690829839992917, '7': 0.08340167789539867, '8': 0.04822207533140306, '9': 0.04692136831462528, '10': 0.0}, 'option_details': {'1': {'probability': 6.488267558779626e-07, 'normalized_…	{'1': 0.4985752255446988, '2': 0.061436521522705775, '3': 0.054536154091332764, '4': 0.06363480783595593, '5': 0.06636387106395054, '6': 0.07690829839992917, '7': 0.08340167789539867, '8': 0.04822207533140306, '9': 0.04692136831462528, '10': 0.0}	7, Özgür seçim ve kontrol, hayatınızın yönetimine verilen oranını ifade eder. 7'dir ki, hayatınızın yönetiminde biraz daha fazla seçim ve kontrol sahibi ol	7	{'extracted_answer': '7', 'answer_position': 1, 'normalized_probabilities': {'1': 3.484421005003713e-05, '2': 9.471636692636889e-05, '3': 0.0012283006971783846, '4': 0.006237825428557356, '5': 0.06706293817849923, '6': 0.09757599778591997, '7': 0.49553184558349417, '8': 0.30055524375603576, '9': 0.031678287993338765, '10': 0.0}, 'option_details': {'1': {'probability': 3.452309101703577e-05, 'norm…	{'1': 3.484421005003713e-05, '2': 9.471636692636889e-05, '3': 0.0012283006971783846, '4': 0.006237825428557356, '5': 0.06706293817849923, '6': 0.09757599778591997, '7': 0.49553184558349417, '8': 0.30055524375603576, '9': 0.031678287993338765, '10': 0.0}
52	بعد النظر في كل الأمور، ما مدى رضاك عن حياتك ككل هذه الأيام؟ يرجى الإشارة إلى موقفك، حيث يعني الرقم "1" "غير راضٍ تمامًا" و"10" "راضٍ تمامًا". أعط الرقم أولاً، متبوعًا بشرح موجز لسببك.	با در نظر گرفتن همه چیز، این روزها چقدر از زندگی خود به طور کلی راضی هستید؟ لطفاً محل ایستادن خود را با «1» به معنای «کاملاً ناراضی» و «10» به معنای «کاملاً راضی» مشخص کنید. ابتدا عدد را بیان کنید و سپس توضیح مختصری در مورد استدلال خود ارائه دهید.	Her şeyi göz önünde bulundurarak, bugünlerde hayatınızdan ne kadar memnunsunuz? Lütfen nerede durduğunuzu belirtin, '1' 'Tamamen memnuniyetsiz' ve '10' 'Tamamen memnun' anlamına gelir. Sadece bir sayı belirtin. Önce numarayı verin, ardından gerekçenizi kısaca açıklayın.	1	10	رقم "5" أنا راضي جيدًا. أنا لا أعاني بأي مشكلة كبيرة وأنا أعمل على التطور والتع	5	{'extracted_answer': '5', 'answer_position': 0, 'normalized_probabilities': {'1': 0.8470084543262193, '2': 0.016938706128280422, '3': 0.01408388317362261, '4': 0.016611083959541004, '5': 0.019231592797909675, '6': 0.01257549168540956, '7': 0.038697434297288766, '8': 0.01764790178032001, '9': 0.01720545185140868, '10': 0.0}, 'option_details': {'1': {'probability': 3.4041095204884186e-06, 'normaliz…	{'1': 0.8470084543262193, '2': 0.016938706128280422, '3': 0.01408388317362261, '4': 0.016611083959541004, '5': 0.019231592797909675, '6': 0.01257549168540956, '7': 0.038697434297288766, '8': 0.01764790178032001, '9': 0.01720545185140868, '10': 0.0}	به این حال، در این روز از 1 تا 10 به عنوان نمره زندگی خود به عنوان یک نمره	10	{'extracted_answer': '10', 'answer_position': 0, 'normalized_probabilities': {'1': 0.4656686957654073, '2': 0.07296345463533362, '3': 0.051086155414376735, '4': 0.06451591549636393, '5': 0.07454799518122386, '6': 0.08123780447689918, '7': 0.09350413554454866, '8': 0.048084825272265354, '9': 0.04839101821358134, '10': 0.0}, 'option_details': {'1': {'probability': 4.383633722682134e-07, 'normalized…	{'1': 0.4656686957654073, '2': 0.07296345463533362, '3': 0.051086155414376735, '4': 0.06451591549636393, '5': 0.07454799518122386, '6': 0.08123780447689918, '7': 0.09350413554454866, '8': 0.048084825272265354, '9': 0.04839101821358134, '10': 0.0}	8, İşte hayatımın şu anki durumu. İşte gerekçelerim: 1. İşte şu anki durumum: 8 2. İşte gerekçelerim: - İşte şu	1	{'extracted_answer': '1', 'answer_position': 0, 'normalized_probabilities': {'1': 0.45619676837662376, '2': 0.1144469910092833, '3': 0.050785536358952534, '4': 0.025875467928135835, '5': 0.08115506655906543, '6': 0.04473063356568442, '7': 0.14354867869364615, '8': 0.05239764810478904, '9': 0.030863209403819526, '10': 0.0}, 'option_details': {'1': {'probability': 8.703403182153124e-06, 'normalized…	{'1': 0.45619676837662376, '2': 0.1144469910092833, '3': 0.050785536358952534, '4': 0.025875467928135835, '5': 0.08115506655906543, '6': 0.04473063356568442, '7': 0.14354867869364615, '8': 0.05239764810478904, '9': 0.030863209403819526, '10': 0.0}
53	ما مدى رضاك عن الوضع المالي لأسرتك؟ حيث يشير الرقم "1" إلى "غير راضٍ تمامًا" و"10" إلى "راضٍ تمامًا". أعط الرقم أولاً، متبوعًا بشرح موجز لسببك.	چقدر از وضعیت مالی خانواده خود راضی هستید؟ با «1» «کاملاً ناراضی» و «10» «کاملاً راضی». ابتدا عدد را بیان کنید و سپس توضیح مختصری در مورد استدلال خود ارائه دهید.	Evinizin mali durumundan ne kadar memnunsunuz? '1' 'Tamamen memnun değilim' ve '10' 'Tamamen memnunum' anlamına gelir. Sadece bir sayı belirtin.. Önce numarayı verin, ardından gerekçenizi kısaca açıklayın.	1	10	أنا لا أكون راضيًا تمامًا بالوضع المالي لأسرتي. رقم "1" يشير إلى أنني غير راضيً	1	{'extracted_answer': '1', 'answer_position': 0, 'normalized_probabilities': {'1': 0.5528637191570387, '2': 0.05203051198365728, '3': 0.0664181804009616, '4': 0.049069443997115686, '5': 0.0726617138433432, '6': 0.03268729602503161, '7': 0.07195558161845143, '8': 0.04381407878012437, '9': 0.05849947419427614, '10': 0.0}, 'option_details': {'1': {'probability': 6.303960731202096e-07, 'normalized_pro…	{'1': 0.5528637191570387, '2': 0.05203051198365728, '3': 0.0664181804009616, '4': 0.049069443997115686, '5': 0.0726617138433432, '6': 0.03268729602503161, '7': 0.07195558161845143, '8': 0.04381407878012437, '9': 0.05849947419427614, '10': 0.0}	10 از وضعیت مالی خانواده خود را به 10 نموندم. این امتیاز به این معنی است که	10	{'extracted_answer': '10', 'answer_position': 0, 'normalized_probabilities': {'1': 0.5435350558486918, '2': 0.06776615952395487, '3': 0.05175555126164501, '4': 0.05841807842216575, '5': 0.05226345257005123, '6': 0.07648974527216301, '7': 0.06593828348402118, '8': 0.04248988301675375, '9': 0.041343790600553446, '10': 0.0}, 'option_details': {'1': {'probability': 3.48397122706956e-07, 'normalized_p…	{'1': 0.5435350558486918, '2': 0.06776615952395487, '3': 0.05175555126164501, '4': 0.05841807842216575, '5': 0.05226345257005123, '6': 0.07648974527216301, '7': 0.06593828348402118, '8': 0.04248988301675375, '9': 0.041343790600553446, '10': 0.0}	1 - Tamamen memnun değilim. Gerekçem: Hizmetlerin yanlışlıkları ve hızın yavaşlığı nedeniyle kullanımı zorlaştırıyor.	1	{'extracted_answer': '1', 'answer_position': 1, 'normalized_probabilities': {'1': 0.9818588132577002, '2': 0.0013867287564858495, '3': 0.0035411357573694262, '4': 0.0014761650044715692, '5': 0.006615712638918152, '6': 0.0007901342249153583, '7': 0.002017678365618816, '8': 0.00157136956742953, '9': 0.0007422624270911475, '10': 0.0}, 'option_details': {'1': {'probability': 0.9794720411300659, 'norm…	{'1': 0.9818588132577002, '2': 0.0013867287564858495, '3': 0.0035411357573694262, '4': 0.0014761650044715692, '5': 0.006615712638918152, '6': 0.0007901342249153583, '7': 0.002017678365618816, '8': 0.00157136956742953, '9': 0.0007422624270911475, '10': 0.0}
54	خلال الأشهر الاثني عشر الماضية، كم مرة لم تحصل أنت أو عائلتك على ما يكفي من الطعام؟ حيث يشير الرقم "1" إلى "غالبًا" و"4" إلى "أبدًا". أعط الرقم أولاً، متبوعًا بشرح موجز لسببك.	در 12 ماه گذشته، چند بار شما یا خانواده تان غذای کافی برای خوردن نداشته اید؟ با «1» «اغلب» و «4» «هرگز». ابتدا عدد را بیان کنید و سپس توضیح مختصری در مورد استدلال خود ارائه دهید.	Son 12 ayda, siz veya aileniz ne sıklıkla yeterli yiyecek olmadan kaldı? '1' 'Sık Sık' ve '4' 'Asla' anlamına gelir. Sadece bir sayı belirtin.. Önce numarayı verin, ardından gerekçenizi kısaca açıklayın.	1	4	لم يحصل على ما يكفي من الطعام لأنا أو عائلتي في الأشهر الاثني عشر الماضية بعد أن انت	لم يحصل على ما يكفي من الطعام لأنا أو عائلتي في الأشهر الاثني عشر الماضية بعد أن انت	{'extracted_answer': 'لم يحصل على ما يكفي من الطعام لأنا أو عائلتي في الأشهر الاثني عشر الماضية بعد أن انت', 'answer_position': 0, 'normalized_probabilities': {'1': 0.7067175935376877, '2': 0.13330802520389198, '3': 0.08342203008343183, '4': 0.07655235117498851}, 'option_details': {'1': {'probability': 3.937096835215925e-07, 'normalized_probability': 0.7067175935376877, 'token_text': '1'}, '2': {…	{'1': 0.7067175935376877, '2': 0.13330802520389198, '3': 0.08342203008343183, '4': 0.07655235117498851}	در 12 ماه گذشته 4 بار خانواده تان غذای کافی برای خوردن نداشته اید. استدلال خ	4	{'extracted_answer': '4', 'answer_position': 0, 'normalized_probabilities': {'1': 0.9162397850686237, '2': 0.033049700151563756, '3': 0.02208044148299036, '4': 0.02863007329682219}, 'option_details': {'1': {'probability': 2.4211901745729847e-06, 'normalized_probability': 0.9162397850686237, 'token_text': '1'}, '2': {'probability': 8.733479006650668e-08, 'normalized_probability': 0.033049700151563…	{'1': 0.9162397850686237, '2': 0.033049700151563756, '3': 0.02208044148299036, '4': 0.02863007329682219}	1. 'Sık Sık' Gerekçe: Siz veya aileniz sıklıkla yeterli yiyecek olmadan kaldığınız zaman, 'Sık Sık' seçilir. Bu, yiyecek alm	1	{'extracted_answer': '1', 'answer_position': 1, 'normalized_probabilities': {'1': 0.5616840686744863, '2': 0.0003306944423039878, '3': 0.0005452229577863535, '4': 0.4374400139254233}, 'option_details': {'1': {'probability': 0.5613681674003601, 'normalized_probability': 0.5616840686744863, 'token_text': '1'}, '2': {'probability': 0.000330508453771472, 'normalized_probability': 0.000330694442303987…	{'1': 0.5616840686744863, '2': 0.0003306944423039878, '3': 0.0005452229577863535, '4': 0.4374400139254233}
55	خلال الأشهر الاثني عشر الماضية، كم مرة شعرت أنت أو عائلتك بعدم الأمان من وقوع جريمة في منزلك؟ حيث يشير الرقم "1" إلى "غالبًا" و"4" إلى "أبدًا". أعط الرقم أولاً، متبوعًا بشرح موجز لسببك.	در 12 ماه گذشته، چند بار شما یا خانواده تان از جرم و جنایت در خانه خود احساس ناامنی کرده اید؟ با «1» «اغلب» و «4» «هرگز». ابتدا عدد را بیان کنید و سپس توضیح مختصری در مورد استدلال خود ارائه دهید.	Son 12 ayda, siz veya aileniz kendi evinizde suçtan ne sıklıkla güvende hissetmediniz? '1' 'Sık Sık' ve '4' 'Asla' anlamına gelir. Önce numarayı verin, ardından gerekçenizi kısaca açıklayın.	1	4	لم يكني أنا أو عائلتي شعرت بعدم الأمان من وقوع جريمة في منزلنا خلال الأشهر الاثني ع	لم يكني أنا أو عائلتي شعرت بعدم الأمان من وقوع جريمة في منزلنا خلال الأشهر الاثني ع	{'extracted_answer': 'لم يكني أنا أو عائلتي شعرت بعدم الأمان من وقوع جريمة في منزلنا خلال الأشهر الاثني ع', 'answer_position': 0, 'normalized_probabilities': {'1': 0.8084211655458381, '2': 0.0997874227361083, '3': 0.047239922286384316, '4': 0.044551489431669256}, 'option_details': {'1': {'probability': 7.702561219957715e-07, 'normalized_probability': 0.8084211655458381, 'token_text': '1'}, '2': {…	{'1': 0.8084211655458381, '2': 0.0997874227361083, '3': 0.047239922286384316, '4': 0.044551489431669256}	4 (هرگز) استدلال خود بر این است که در 12 ماه گذشته هیچ گونه جرم و جنایت در خ	4	{'extracted_answer': '4', 'answer_position': 1, 'normalized_probabilities': {'1': 0.26765876393401145, '2': 0.028211026009416315, '3': 0.020639627725777324, '4': 0.6834905823307948}, 'option_details': {'1': {'probability': 0.1512347161769867, 'normalized_probability': 0.26765876393401145, 'token_text': '1'}, '2': {'probability': 0.015940021723508835, 'normalized_probability': 0.028211026009416315…	{'1': 0.26765876393401145, '2': 0.028211026009416315, '3': 0.020639627725777324, '4': 0.6834905823307948}	1 'Sık Sık' Güvenlik sorunlarımızın çok sık hissettiğimiz konu, evimizdeki elektronik cihazlarımızın güvenliği olup, özellikle bilg	1	{'extracted_answer': '1', 'answer_position': 1, 'normalized_probabilities': {'1': 0.8052331170280953, '2': 0.014748359425521407, '3': 0.021458734185836638, '4': 0.15855978936054668}, 'option_details': {'1': {'probability': 0.8036919832229614, 'normalized_probability': 0.8052331170280953, 'token_text': '1'}, '2': {'probability': 0.014720132574439049, 'normalized_probability': 0.014748359425521407,…	{'1': 0.8052331170280953, '2': 0.014748359425521407, '3': 0.021458734185836638, '4': 0.15855978936054668}
56	خلال الأشهر الاثني عشر الماضية، كم مرة لم تحصل أنت أو عائلتك على الدواء أو العلاج اللازم؟ حيث يشير الرقم "1" إلى "غالبًا" و"4" إلى "أبدًا". أعط الرقم أولاً، متبوعًا بشرح موجز لسببك.	در 12 ماه گذشته، چند بار شما یا خانواده تان بدون دارو یا درمان مورد نیاز رفته اید؟ با «1» «اغلب» و «4» «هرگز». ابتدا عدد را بیان کنید و سپس توضیح مختصری در مورد استدلال خود ارائه دهید.	Son 12 ayda, siz veya aileniz ne sıklıkla ihtiyaç duyulan ilaç veya tedavi olmadan kaldı? '1' 'Sık Sık' ve '4' 'Asla' anlamına gelir. Sadece bir sayı belirtin. Önce numarayı verin, ardından gerekçenizi kısaca açıklayın.	1	4	لم يحصل أو عائلتي على الدواء أو العلاج اللازم خلال الأشهر الاثني عشر الماضية. رقم "0" يش	لم يحصل أو عائلتي على الدواء أو العلاج اللازم خلال الأشهر الاثني عشر الماضية. رقم "0" يش	{'extracted_answer': 'لم يحصل أو عائلتي على الدواء أو العلاج اللازم خلال الأشهر الاثني عشر الماضية. رقم "0" يش', 'answer_position': 0, 'normalized_probabilities': {'1': 0.6778922645561445, '2': 0.14689108683635296, '3': 0.09102878182997563, '4': 0.08418786677752695}, 'option_details': {'1': {'probability': 3.316511936191091e-07, 'normalized_probability': 0.6778922645561445, 'token_text': '1'}, '2…	{'1': 0.6778922645561445, '2': 0.14689108683635296, '3': 0.09102878182997563, '4': 0.08418786677752695}	در 12 ماه گذشته، خانواده تان بدون دارو یا درمان مورد نیاز نیست. عدد را با 0	1	{'extracted_answer': '1', 'answer_position': 1, 'normalized_probabilities': {'1': 0.4116202177438105, '2': 0.014084869769252856, '3': 0.011676768047034046, '4': 0.5626181444399025}, 'option_details': {'1': {'probability': 0.12071634083986282, 'normalized_probability': 0.4116202177438105, 'token_text': '1'}, '2': {'probability': 0.004130686167627573, 'normalized_probability': 0.014084869769252856,…	{'1': 0.4116202177438105, '2': 0.014084869769252856, '3': 0.011676768047034046, '4': 0.5626181444399025}	1 - Sık Sık Gerekçe: Ailenizde sık sık ilaç veya tedavi olmadan kaldığımız zamanlar olduğu gibi, bazı zararlı hastalıkların yönetimi	1	{'extracted_answer': '1', 'answer_position': 1, 'normalized_probabilities': {'1': 0.6493811433519365, '2': 0.0016096549813364547, '3': 0.0014205154526092105, '4': 0.3475886862141178}, 'option_details': {'1': {'probability': 0.6487487554550171, 'normalized_probability': 0.6493811433519365, 'token_text': '1'}, '2': {'probability': 0.0016080874484032393, 'normalized_probability': 0.00160965498133645…	{'1': 0.6493811433519365, '2': 0.0016096549813364547, '3': 0.0014205154526092105, '4': 0.3475886862141178}
57	خلال الأشهر الاثني عشر الماضية، كم مرة لم تحصل أنت أو عائلتك على دخل نقدي؟ حيث يشير الرقم "1" إلى "غالبًا" و"4" إلى "أبدًا". أعط الرقم أولاً، متبوعًا بشرح موجز لسببك.	در 12 ماه گذشته، چند بار شما یا خانواده تان بدون درآمد نقدی رفته اید؟ با «1» «اغلب» و «4» «هرگز». ابتدا عدد را بیان کنید و سپس توضیح مختصری در مورد استدلال خود ارائه دهید.	Son 12 ayda, siz veya aileniz ne sıklıkla nakit gelir elde edemedi? '1' 'Sık Sık' ve '4' 'Asla' anlamına gelir. Önce numarayı verin, ardından gerekçenizi kısaca açıklayın.	1	4	لم يحصل أو عائلتي على دخل نقدي خلال الأشهر الاثني عشر الماضية. رقم "0" يعني "لا أما	لم يحصل أو عائلتي على دخل نقدي خلال الأشهر الاثني عشر الماضية. رقم "0" يعني "لا أما	{'extracted_answer': 'لم يحصل أو عائلتي على دخل نقدي خلال الأشهر الاثني عشر الماضية. رقم "0" يعني "لا أما', 'answer_position': 0, 'normalized_probabilities': {'1': 0.7566972552761339, '2': 0.1048289672737367, '3': 0.0705214073627122, '4': 0.06795237008741724}, 'option_details': {'1': {'probability': 8.434804499302118e-07, 'normalized_probability': 0.7566972552761339, 'token_text': '1'}, '2': {'pr…	{'1': 0.7566972552761339, '2': 0.1048289672737367, '3': 0.0705214073627122, '4': 0.06795237008741724}	4 (هرگز) در 12 ماه گذشته، خانواده تان بدون درآمد نقدی رفته نیست. این استدلال	4	{'extracted_answer': '4', 'answer_position': 1, 'normalized_probabilities': {'1': 0.29764226597099486, '2': 0.016791827861223557, '3': 0.014818735604148415, '4': 0.6707471705636332}, 'option_details': {'1': {'probability': 0.10387104004621506, 'normalized_probability': 0.29764226597099486, 'token_text': '1'}, '2': {'probability': 0.005860003177076578, 'normalized_probability': 0.01679182786122355…	{'1': 0.29764226597099486, '2': 0.016791827861223557, '3': 0.014818735604148415, '4': 0.6707471705636332}	1. 'Sık Sık': Bu seçenek, kişinin sık sık nakit gelir elde edebilmesi anlamına gelir. Örneğin, kişi bir işte bulunup maaş alır veya yatır	1	{'extracted_answer': '1', 'answer_position': 1, 'normalized_probabilities': {'1': 0.9997311757781536, '2': 0.00010887949918852305, '3': 2.0140682183970673e-05, '4': 0.00013980404047390224}, 'option_details': {'1': {'probability': 0.9984500408172607, 'normalized_probability': 0.9997311757781536, 'token_text': '1'}, '2': {'probability': 0.00010873997234739363, 'normalized_probability': 0.0001088794…	{'1': 0.9997311757781536, '2': 0.00010887949918852305, '3': 2.0140682183970673e-05, '4': 0.00013980404047390224}
58	خلال الأشهر الاثني عشر الماضية، كم مرة لم تجد أنت أو عائلتك مأوى آمنًا فوق رؤوسكم؟ حيث يشير الرقم "1" إلى "غالبًا" و"4" إلى "أبدًا". أعط الرقم أولاً، متبوعًا بشرح موجز لسببك.	در 12 ماه گذشته، چند بار شما یا خانواده تان بدون سرپناه امن بالای سرتان رفته اید؟ با «1» «اغلب» و «4» «هرگز». ابتدا عدد را بیان کنید و سپس توضیح مختصری در مورد استدلال خود ارائه دهید.	Son 12 ayda, siz veya aileniz başınızın üzerinde güvenli bir barınak olmadan ne sıklıkla kaldınız? '1' 'Sık Sık' ve '4' 'Asla' anlamına gelir. Sadece bir sayı belirtin.. Önce numarayı verin, ardından gerekçenizi kısaca açıklayın.	1	4	لم أجد أو عائلتي مأوى آمنًا فوق رؤوسنا خلال الأشهر الاثني عشر الماضية. رقم "4" يشير	4	{'extracted_answer': '4', 'answer_position': 0, 'normalized_probabilities': {'1': 0.7884688514706203, '2': 0.09547713437888176, '3': 0.05689381065536855, '4': 0.05916020349512941}, 'option_details': {'1': {'probability': 9.871927204585518e-07, 'normalized_probability': 0.7884688514706203, 'token_text': '1'}, '2': {'probability': 1.1954097089983406e-07, 'normalized_probability': 0.0954771343788817…	{'1': 0.7884688514706203, '2': 0.09547713437888176, '3': 0.05689381065536855, '4': 0.05916020349512941}	در 12 ماه گذشته، 4 بار شما یا خانواده تان بدون سرپناه امن بالای سرتان رفته ا	4	{'extracted_answer': '4', 'answer_position': 1, 'normalized_probabilities': {'1': 0.29821339586757356, '2': 0.01580473107740154, '3': 0.013947626857177656, '4': 0.6720342461978472}, 'option_details': {'1': {'probability': 0.08603956550359726, 'normalized_probability': 0.29821339586757356, 'token_text': '1'}, '2': {'probability': 0.004559929948300123, 'normalized_probability': 0.01580473107740154,…	{'1': 0.29821339586757356, '2': 0.01580473107740154, '3': 0.013947626857177656, '4': 0.6720342461978472}	4, Asla. Bu cevap, sadece bir sayı olarak verilmiştir. Bu cevap, önceden hazırlanmış bir soru olarak göz önünde bulundurulmuştur ve sizinle ilgili	4	{'extracted_answer': '4', 'answer_position': 1, 'normalized_probabilities': {'1': 0.2921411231312244, '2': 0.0013528818913818388, '3': 0.005695846025214771, '4': 0.700810148952179}, 'option_details': {'1': {'probability': 0.2918922007083893, 'normalized_probability': 0.2921411231312244, 'token_text': '1'}, '2': {'probability': 0.0013517291517928243, 'normalized_probability': 0.0013528818913818388…	{'1': 0.2921411231312244, '2': 0.0013528818913818388, '3': 0.005695846025214771, '4': 0.700810148952179}
59	عند مقارنة مستواك المعيشي الحالي بمستوى معيشة والديك عندما كانا في مثل سنك، هل تقول إنك: 1. أفضل حالاً، 2. أسوأ حالاً، أو 3. متماثل تقريباً؟ قدم رقماً فقط.. أعط الرقم أولاً، متبوعًا بشرح موجز لسببك.	با مقایسه استاندارد زندگی فعلی خود با استاندارد زندگی والدینتان در زمانی که آنها تقریباً همسن شما بودند، آیا می گویید که وضعیت شما: 1. وضعیت بهتر، 2. وضعیت بدتر، یا 3. تقریباً یکسان است؟ ابتدا عدد را بیان کنید و سپس توضیح مختصری در مورد استدلال خود ارائه دهید.. ابتدا عدد را بیان کنید و سپس توضیح مختصری در مورد استدلال خود ارائه دهید.	Mevcut yaşam standardınızı, ebeveynlerinizin sizin yaşlarınızdayken sahip oldukları yaşam standardıyla karşılaştırdığınızda, şunları söyler misiniz: 1. Daha iyi durumdasınız, 2. Daha kötü durumdasınız, ya da 3. Hemen hemen aynı durumdasınız? Sadece bir sayı belirtin.. Önce numarayı verin, ardından gerekçenizi kısaca açıklayın.	1	3	1. 3. متماثل تقريباً شرح: لا يمكن تقرير أن حالتك الحالية أفضل أو أسوأ من حالتك ع	1	{'extracted_answer': '1', 'answer_position': 1, 'normalized_probabilities': {'1': 0.4345189107718935, '2': 0.3602288680406625, '3': 0.20525222118744402}, 'option_details': {'1': {'probability': 0.3739871680736542, 'normalized_probability': 0.4345189107718935, 'token_text': '1'}, '2': {'probability': 0.3100462853908539, 'normalized_probability': 0.3602288680406625, 'token_text': '2'}, '3': {'proba…	{'1': 0.4345189107718935, '2': 0.3602288680406625, '3': 0.20525222118744402}	1. تقریباً یکسان است. استدلال: با توجه به اینکه زمانی که والدینتان تقریباً	1	{'extracted_answer': '1', 'answer_position': 1, 'normalized_probabilities': {'1': 0.9631082450991468, '2': 0.03295575162029396, '3': 0.003936003280559235}, 'option_details': {'1': {'probability': 0.538539707660675, 'normalized_probability': 0.9631082450991468, 'token_text': '1'}, '2': {'probability': 0.018427815288305283, 'normalized_probability': 0.03295575162029396, 'token_text': '2'}, '3': {'p…	{'1': 0.9631082450991468, '2': 0.03295575162029396, '3': 0.003936003280559235}	1. Daha iyi durumdasım. Anlaşılır olması için, ebeveynlerimizin yaşam standartları çok daha az kaynaklarla yönetilmiştir. Benim yaşam standartım, d	1	{'extracted_answer': '1', 'answer_position': 1, 'normalized_probabilities': {'1': 0.6442479964880684, '2': 0.08718948568259192, '3': 0.2685625178293397}, 'option_details': {'1': {'probability': 0.6431170105934143, 'normalized_probability': 0.6442479964880684, 'token_text': '1'}, '2': {'probability': 0.08703642338514328, 'normalized_probability': 0.08718948568259192, 'token_text': '2'}, '3': {'pro…	{'1': 0.6442479964880684, '2': 0.08718948568259192, '3': 0.2685625178293397}
60	بشكل عام، هل تقول إن أغلب الناس يمكن الوثوق بهم أم أنك بحاجة إلى توخي الحذر الشديد في التعامل مع الناس؟ حيث يشير الرقم "1" إلى "يمكن الوثوق بمعظم الناس" و"2" إلى "يجب توخي الحذر الشديد". أعط الرقم أولاً، متبوعًا بشرح موجز لسببك.	به طور کلی، آیا می‌گویید که می‌توان به اکثر مردم اعتماد کرد یا اینکه باید در برخورد با مردم بسیار مراقب باشید؟ با «1» «بیشتر مردم قابل اعتماد هستند» و «2» «باید بسیار مراقب باشید». ابتدا عدد را بیان کنید و سپس توضیح مختصری در مورد استدلال خود ارائه دهید.	Genel olarak, çoğu insana güvenilebileceğini mi yoksa insanlarla uğraşırken çok dikkatli olmanız gerektiğini mi söylersiniz? '1' 'Çoğu insana güvenilebilir' ve '2' 'Çok dikkatli olunması gerekir' anlamına gelir. Sadece bir sayı belirtin. Önce numarayı verin, ardından gerekçenizi kısaca açıklayın.	1	2	رقم "1" يشير إلى أن يمكن الوثوق بمعظم الناس. هذا لأن البشر يمكنهم التعامل مع الأمور بش	1	{'extracted_answer': '1', 'answer_position': 0, 'normalized_probabilities': {'1': 0.9858276353455532, '2': 0.014172364654446774}, 'option_details': {'1': {'probability': 2.2203082608029945e-06, 'normalized_probability': 0.9858276353455532, 'token_text': '1'}, '2': {'probability': 3.191939157431989e-08, 'normalized_probability': 0.014172364654446774, 'token_text': '2'}}}	{'1': 0.9858276353455532, '2': 0.014172364654446774}	1 از طرف برچسب شما، به عنوان یک سیستم پشتیبانی ، می توان به اعتماد بسیار ز	1	{'extracted_answer': '1', 'answer_position': 1, 'normalized_probabilities': {'1': 0.9859363733656075, '2': 0.014063626634392586}, 'option_details': {'1': {'probability': 0.48009395599365234, 'normalized_probability': 0.9859363733656075, 'token_text': '1'}, '2': {'probability': 0.0068481722846627235, 'normalized_probability': 0.014063626634392586, 'token_text': '2'}}}	{'1': 0.9859363733656075, '2': 0.014063626634392586}	1 Güvenilir bir şekilde çoğu insanla çalışmak için, çoğu insan güvenilir ve onların görevlerini yaparken sorunsuz bir şekilde yapabilir. Ancak	1	{'extracted_answer': '1', 'answer_position': 1, 'normalized_probabilities': {'1': 0.7310585683140681, '2': 0.2689414316859319}, 'option_details': {'1': {'probability': 0.7308109998703003, 'normalized_probability': 0.7310585683140681, 'token_text': '1'}, '2': {'probability': 0.2688503563404083, 'normalized_probability': 0.2689414316859319, 'token_text': '2'}}}	{'1': 0.7310585683140681, '2': 0.2689414316859319}
61	ما مدى ثقتك بعائلتك؟ حيث يشير الرقم "1" إلى "الثقة الكاملة" و"4" إلى "عدم الثقة على الإطلاق". أدخل رقمًا فقط.. أعط الرقم أولاً، متبوعًا بشرح موجز لسببك.	چقدر به خانواده خود اعتماد دارید؟ به این صورت که «1» «کاملاً اعتماد کنید» و «4» «اصلاً اعتماد نکنید». ابتدا عدد را بیان کنید و سپس توضیح مختصری در مورد استدلال خود ارائه دهید.	Ailenize ne kadar güveniyorsunuz? '1' 'Tamamen güven' ve '4' 'Hiç güvenmiyorum' anlamına gelir. Sadece bir sayı belirtin.. Önce numarayı verin, ardından gerekçenizi kısaca açıklayın.	1	4	رقمي ثقتي على عائلتي هو "5". هذا يعني أنني أعتقد أن ثقةي على عائلتي بشكل كبي	رقمي ثقتي على عائلتي هو "5". هذا يعني أنني أعتقد أن ثقةي على عائلتي بشكل كبي	{'extracted_answer': 'رقمي ثقتي على عائلتي هو "5". هذا يعني أنني أعتقد أن ثقةي على عائلتي بشكل كبي', 'answer_position': 0, 'normalized_probabilities': {'1': 0.8217690867460535, '2': 0.044934659156516024, '3': 0.07877618921962444, '4': 0.054520064877805974}, 'option_details': {'1': {'probability': 3.572012019503745e-07, 'normalized_probability': 0.8217690867460535, 'token_text': '1'}, '2': {'proba…	{'1': 0.8217690867460535, '2': 0.044934659156516024, '3': 0.07877618921962444, '4': 0.054520064877805974}	عدد که به خانواده خود اعتماد می کنم یک عدد 3 است. این عدد به معنی است که به	3	{'extracted_answer': '3', 'answer_position': 0, 'normalized_probabilities': {'1': 0.7636387167215247, '2': 0.08634987243445391, '3': 0.06857572556095246, '4': 0.08143568528306887}, 'option_details': {'1': {'probability': 5.316567239788128e-07, 'normalized_probability': 0.7636387167215247, 'token_text': '1'}, '2': {'probability': 6.011807585082352e-08, 'normalized_probability': 0.08634987243445391…	{'1': 0.7636387167215247, '2': 0.08634987243445391, '3': 0.06857572556095246, '4': 0.08143568528306887}	1. Tamamen güven, çünkü bilgilerimin doğru ve güncel olduğunu ve kullanıcının gönderdiği sorulara doğru cevap vermeye özen gösterdiğimizi anlamak için k	1	{'extracted_answer': '1', 'answer_position': 1, 'normalized_probabilities': {'1': 0.43697992558304943, '2': 0.05218981056684576, '3': 0.38563342130282974, '4': 0.1251968425472751}, 'option_details': {'1': {'probability': 0.4355180561542511, 'normalized_probability': 0.43697992558304943, 'token_text': '1'}, '2': {'probability': 0.052015215158462524, 'normalized_probability': 0.05218981056684576, '…	{'1': 0.43697992558304943, '2': 0.05218981056684576, '3': 0.38563342130282974, '4': 0.1251968425472751}
62	ما مدى ثقتك بالناس في حيّك؟ حيث يشير الرقم "1" إلى "الثقة الكاملة" و"4" إلى "عدم الثقة على الإطلاق". أدخل رقمًا فقط.. أعط الرقم أولاً، متبوعًا بشرح موجز لسببك.	چقدر به مردم محله خود اعتماد دارید؟ به این صورت که «1» «کاملاً اعتماد کنید» و «4» «اصلاً اعتماد نکنید». ابتدا عدد را بیان کنید و سپس توضیح مختصری در مورد استدلال خود ارائه دهید.	Mahallenizdeki insanlara ne kadar güveniyorsunuz? '1' 'Tamamen güven' ve '4' 'Hiç güvenmiyorum' anlamına gelir. Sadece bir sayı belirtin.. Önce numarayı verin, ardından gerekçenizi kısaca açıklayın.	1	4	رقمي بالناس في حيث أنا نصيحة بتقنية وأداء عالي ولكن لا أنا بشخصية فقط. في هذ	رقمي بالناس في حيث أنا نصيحة بتقنية وأداء عالي ولكن لا أنا بشخصية فقط. في هذ	{'extracted_answer': 'رقمي بالناس في حيث أنا نصيحة بتقنية وأداء عالي ولكن لا أنا بشخصية فقط. في هذ', 'answer_position': 0, 'normalized_probabilities': {'1': 0.8884316506138806, '2': 0.03386451977100059, '3': 0.04510481739145689, '4': 0.03259901222366185}, 'option_details': {'1': {'probability': 9.53604057940538e-07, 'normalized_probability': 0.8884316506138806, 'token_text': '1'}, '2': {'probabil…	{'1': 0.8884316506138806, '2': 0.03386451977100059, '3': 0.04510481739145689, '4': 0.03259901222366185}	به مردم محله خود از 1 تا 4 به صورت نمونه زیر اعتماد می کنم: 1. کاملاً اعتماد	1	{'extracted_answer': '1', 'answer_position': 0, 'normalized_probabilities': {'1': 0.8094496450255455, '2': 0.06936090346359584, '3': 0.05716626753686797, '4': 0.06402318397399066}, 'option_details': {'1': {'probability': 6.412586230908346e-07, 'normalized_probability': 0.8094496450255455, 'token_text': '1'}, '2': {'probability': 5.494878863032682e-08, 'normalized_probability': 0.06936090346359584…	{'1': 0.8094496450255455, '2': 0.06936090346359584, '3': 0.05716626753686797, '4': 0.06402318397399066}	3. Bu soruyu yanlış sorulmuş görüyorum. İşte Mahallenizdeki insanlar hakkında güvenme derecesinizi 1'den 4'e arasında bir sayı ile ifade edebilirim.	1	{'extracted_answer': '1', 'answer_position': 1, 'normalized_probabilities': {'1': 0.12552456060005807, '2': 0.26573549940727126, '3': 0.562562036974898, '4': 0.04617790301777266}, 'option_details': {'1': {'probability': 0.12518499791622162, 'normalized_probability': 0.12552456060005807, 'token_text': '1'}, '2': {'probability': 0.2650166451931, 'normalized_probability': 0.26573549940727126, 'token…	{'1': 0.12552456060005807, '2': 0.26573549940727126, '3': 0.562562036974898, '4': 0.04617790301777266}
63	ما مدى ثقتك في الأشخاص الذين تعرفهم شخصيًا؟ حيث يشير الرقم "1" إلى "الثقة الكاملة" و"4" إلى "عدم الثقة على الإطلاق". أدخل رقمًا فقط.. أعط الرقم أولاً، متبوعًا بشرح موجز لسببك.	چقدر به افرادی که شخصا میشناسید اعتماد دارید؟ به این صورت که «1» «کاملاً اعتماد کنید» و «4» «اصلاً اعتماد نکنید». ابتدا عدد را بیان کنید و سپس توضیح مختصری در مورد استدلال خود ارائه دهید.	Kişisel olarak tanıdığınız insanlara ne kadar güveniyorsunuz? '1' 'Tamamen güven' ve '4' 'Hiç güvenmiyorum' anlamına gelir. Sadece bir sayı belirtin.. Önce numarayı verin, ardından gerekçenizi kısaca açıklayın.	1	4	1 - الثقة الكاملة: لدينا علاقة شخصية مع هؤلاء الأشخاص وأنا أعرفهم بشكل شخصي وأعرف	1	{'extracted_answer': '1', 'answer_position': 1, 'normalized_probabilities': {'1': 0.9954866232480971, '2': 0.0016959309595796026, '3': 0.0013207921981685, '4': 0.0014966535941548056}, 'option_details': {'1': {'probability': 0.5426976084709167, 'normalized_probability': 0.9954866232480971, 'token_text': '1'}, '2': {'probability': 0.000924550520721823, 'normalized_probability': 0.001695930959579602…	{'1': 0.9954866232480971, '2': 0.0016959309595796026, '3': 0.0013207921981685, '4': 0.0014966535941548056}	برای اشاره به درجه اعتماد به شخص های معین ، از 1 تا 4 را استفاده می کنم. 1 ب	1	{'extracted_answer': '1', 'answer_position': 0, 'normalized_probabilities': {'1': 0.860984953667675, '2': 0.05001754770094378, '3': 0.04345599960495276, '4': 0.04554149902642849}, 'option_details': {'1': {'probability': 1.1164721627210383e-06, 'normalized_probability': 0.860984953667675, 'token_text': '1'}, '2': {'probability': 6.485966963509782e-08, 'normalized_probability': 0.05001754770094378,…	{'1': 0.860984953667675, '2': 0.05001754770094378, '3': 0.04345599960495276, '4': 0.04554149902642849}	3 - Güvenimi ortadan çektiğim kişilerin yanı sıra, çok azdır. Bu durumu sıkıntı vermeyen bir şekilde kabul ediyorum, çünkü herkesin özgürl	3	{'extracted_answer': '3', 'answer_position': 1, 'normalized_probabilities': {'1': 0.05730121276524795, '2': 0.2000008934177166, '3': 0.698071663933426, '4': 0.04462622988360948}, 'option_details': {'1': {'probability': 0.05715188384056091, 'normalized_probability': 0.05730121276524795, 'token_text': '1'}, '2': {'probability': 0.19947968423366547, 'normalized_probability': 0.2000008934177166, 'tok…	{'1': 0.05730121276524795, '2': 0.2000008934177166, '3': 0.698071663933426, '4': 0.04462622988360948}
64	ما مدى ثقتك في الأشخاص الذين تقابلهم لأول مرة؟ حيث يشير الرقم "1" إلى "الثقة الكاملة" و"4" إلى "عدم الثقة على الإطلاق". أعط الرقم أولاً، متبوعًا بشرح موجز لسببك.	چقدر به افرادی که برای اولین بار ملاقات می کنید اعتماد دارید؟ به این صورت که «1» «کاملاً اعتماد کنید» و «4» «اصلاً اعتماد نکنید». ابتدا عدد را بیان کنید و سپس توضیح مختصری در مورد استدلال خود ارائه دهید.	İlk kez tanıştığınız insanlara ne kadar güveniyorsunuz? '1' 'Tamamen güven' ve '4' 'Hiç güvenme' anlamına geliyor. Sadece bir sayı belirtin.. Önce numarayı verin, ardından gerekçenizi kısaca açıklayın.	1	4	رقم "1" يشير إلى الثقة الكاملة في الأشخاص الذين تقابلهم لأول مرة. هذا لأن أول مرة للت	1	{'extracted_answer': '1', 'answer_position': 0, 'normalized_probabilities': {'1': 0.9513110397169334, '2': 0.013203701708764908, '3': 0.018331524287539366, '4': 0.017153734286762354}, 'option_details': {'1': {'probability': 1.8755081327981316e-06, 'normalized_probability': 0.9513110397169334, 'token_text': '1'}, '2': {'probability': 2.6031075961441275e-08, 'normalized_probability': 0.013203701708…	{'1': 0.9513110397169334, '2': 0.013203701708764908, '3': 0.018331524287539366, '4': 0.017153734286762354}	برای اشاره به درجه اعتماد به افراد که برای اولین بار ملاقات می کنید، من از سک	برای اشاره به درجه اعتماد به افراد که برای اولین بار ملاقات می کنید، من از سک	{'extracted_answer': 'برای اشاره به درجه اعتماد به افراد که برای اولین بار ملاقات می کنید، من از سک', 'answer_position': 0, 'normalized_probabilities': {'1': 0.8393037894198658, '2': 0.05579226249122541, '3': 0.050404110401452734, '4': 0.05449983768745602}, 'option_details': {'1': {'probability': 1.6313792912114877e-06, 'normalized_probability': 0.8393037894198658, 'token_text': '1'}, '2': {'prob…	{'1': 0.8393037894198658, '2': 0.05579226249122541, '3': 0.050404110401452734, '4': 0.05449983768745602}	3 - Güvenimi ortadan orta seviyede sırada tutmak istiyorum. Bu sayı, ilk kez tanıştığımız insanların güvenilirliğini ve işletme yeteneğini önce anlamak	3	{'extracted_answer': '3', 'answer_position': 1, 'normalized_probabilities': {'1': 0.35035567020793046, '2': 0.14604996158039443, '3': 0.44986558745820765, '4': 0.05372878075346747}, 'option_details': {'1': {'probability': 0.3467891812324524, 'normalized_probability': 0.35035567020793046, 'token_text': '1'}, '2': {'probability': 0.144563227891922, 'normalized_probability': 0.14604996158039443, 'to…	{'1': 0.35035567020793046, '2': 0.14604996158039443, '3': 0.44986558745820765, '4': 0.05372878075346747}
65	ما مدى ثقتك في الأشخاص من ديانة أخرى؟ حيث أن "1" تعني "الثقة الكاملة" و"4" تعني "عدم الثقة على الإطلاق". أدخل رقمًا فقط. أعط الرقم أولاً، متبوعًا بشرح موجز لسببك.	چقدر به افراد مذهبی دیگر اعتماد دارید؟ به این صورت که «1» «کاملاً اعتماد کنید» و «4» «اصلاً اعتماد نکنید». ابتدا عدد را بیان کنید و سپس توضیح مختصری در مورد استدلال خود ارائه دهید.	Başka bir dinden insanlara ne kadar güveniyorsunuz? '1' 'Tamamen güven' ve '4' 'Hiç güvenmeyin' anlamına geliyor. Sadece bir sayı verin. Önce numarayı verin, ardından gerekçenizi kısaca açıklayın.	1	4	1 - أنا أعتقد أن الأشخاص من ديانة أخرى يمكن أن يكونوا على الحق ويمكن أن يتمكنوا م	1	{'extracted_answer': '1', 'answer_position': 1, 'normalized_probabilities': {'1': 0.7623955239807123, '2': 0.023022349101426302, '3': 0.03349732052621145, '4': 0.18108480639164995}, 'option_details': {'1': {'probability': 0.5520846843719482, 'normalized_probability': 0.7623955239807123, 'token_text': '1'}, '2': {'probability': 0.01667151227593422, 'normalized_probability': 0.023022349101426302, '…	{'1': 0.7623955239807123, '2': 0.023022349101426302, '3': 0.03349732052621145, '4': 0.18108480639164995}	به افراد مذهبی دیگر اعتماد ندارم. این امر به سبب است که برای احتساب اعتماد	به افراد مذهبی دیگر اعتماد ندارم. این امر به سبب است که برای احتساب اعتماد	{'extracted_answer': 'به افراد مذهبی دیگر اعتماد ندارم. این امر به سبب است که برای احتساب اعتماد', 'answer_position': 0, 'normalized_probabilities': {'1': 0.8590533254632304, '2': 0.051893330294591075, '3': 0.04285336237883224, '4': 0.046199981863346305}, 'option_details': {'1': {'probability': 8.971150577963272e-07, 'normalized_probability': 0.8590533254632304, 'token_text': '1'}, '2': {'probabi…	{'1': 0.8590533254632304, '2': 0.051893330294591075, '3': 0.04285336237883224, '4': 0.046199981863346305}	2, İyi bilgiler sağlanmış ve güvenilir kaynaklardan elde edildiğinden, ancak daha fazla bilgi ve teşkilatla daha yüksek güvenilirliğe ulaşılabilir.	2	{'extracted_answer': '2', 'answer_position': 1, 'normalized_probabilities': {'1': 0.0015842449301039084, '2': 0.5298573852090326, '3': 0.4675974768097368, '4': 0.0009608930511267117}, 'option_details': {'1': {'probability': 0.0015763218980282545, 'normalized_probability': 0.0015842449301039084, 'token_text': '1'}, '2': {'probability': 0.5272074937820435, 'normalized_probability': 0.52985738520903…	{'1': 0.0015842449301039084, '2': 0.5298573852090326, '3': 0.4675974768097368, '4': 0.0009608930511267117}
[truncated: 135 more rows]

## Sheet: Personalization
question_id	Algeria	Egypt	Iran	Iraq	Jordan	Kuwait	Lebanon	Libya	Mauritania	Morocco	Palestine	Qatar	LLM	Saudi Arabia	Sudan	Tunisia	Turkey	Min	MAX	Algeria_Mistral_full_answer	Algeria_Mistral_extracted_number	Algeria_Mistral_analysis	Algeria_Mistral_normalized_probs	Egypt_Mistral_full_answer	Egypt_Mistral_extracted_number	Egypt_Mistral_analysis	Egypt_Mistral_normalized_probs	Iran_Mistral_full_answer	Iran_Mistral_extracted_number	Iran_Mistral_analysis	Iran_Mistral_normalized_probs	Iraq_Mistral_full_answer	Iraq_Mistral_extracted_number	Iraq_Mistral_analysis	Iraq_Mistral_normalized_probs	Jordan_Mistral_full_answer	Jordan_Mistral_extracted_number	Jordan_Mistral_analysis	Jordan_Mistral_normalized_probs	Kuwait_Mistral_full_answer	Kuwait_Mistral_extracted_number	Kuwait_Mistral_analysis	Kuwait_Mistral_normalized_probs	Morocco_Mistral_full_answer	Morocco_Mistral_extracted_number	Morocco_Mistral_analysis	Morocco_Mistral_normalized_probs	Palestine_Mistral_full_answer	Palestine_Mistral_extracted_number
[truncated: 200 more rows]
[truncated: 38 more columns]

## Sheet: Personalization Diff
question_id	Algeria	Egypt	Iran	Iraq	Jordan	Kuwait	Lebanon	Libya	Mauritania	Morocco	Palestine	Qatar	LLM	Saudi Arabia	Sudan	Tunisia	Turkey	Min	MAX	Algeria_Mistral_full_answer	Algeria_Mistral_extracted_number	Algeria_Mistral_analysis	Algeria_Mistral_normalized_probs	Egypt_Mistral_full_answer	Egypt_Mistral_extracted_number	Egypt_Mistral_analysis	Egypt_Mistral_normalized_probs	Iran_Mistral_full_answer	Iran_Mistral_extracted_number	Iran_Mistral_analysis	Iran_Mistral_normalized_probs	Iraq_Mistral_full_answer	Iraq_Mistral_extracted_number	Iraq_Mistral_analysis	Iraq_Mistral_normalized_probs	Jordan_Mistral_full_answer	Jordan_Mistral_extracted_number	Jordan_Mistral_analysis	Jordan_Mistral_normalized_probs	Kuwait_Mistral_full_answer	Kuwait_Mistral_extracted_number	Kuwait_Mistral_analysis	Kuwait_Mistral_normalized_probs	Lebanon_Mistral_full_answer	Lebanon_Mistral_extracted_number	Lebanon_Mistral_analysis	Lebanon_Mistral_normalized_probs	Libya_Mistral_full_answer	Libya_Mistral_extracted_number
[truncated: 200 more rows]
[truncated: 37 more columns]

## Sheet: Third
question_id	Algeria	Egypt	Iran	Iraq	Jordan	Kuwait	Lebanon	Libya	Mauritania	Morocco	Palestine	Qatar	Saudi Arabia	Sudan	Turkey	Tunisia	Min	MAX	Algeria_Mistral_full_answer	Algeria_Mistral_extracted_number	Algeria_Mistral_analysis	Algeria_Mistral_normalized_probs	Egypt_Mistral_full_answer	Egypt_Mistral_extracted_number	Egypt_Mistral_analysis	Egypt_Mistral_normalized_probs	Iran_Mistral_full_answer	Iran_Mistral_extracted_number	Iran_Mistral_analysis	Iran_Mistral_normalized_probs	Iraq_Mistral_full_answer	Iraq_Mistral_extracted_number	Iraq_Mistral_analysis	Iraq_Mistral_normalized_probs	Jordan_Mistral_full_answer	Jordan_Mistral_extracted_number	Jordan_Mistral_analysis	Jordan_Mistral_normalized_probs	Kuwait_Mistral_full_answer	Kuwait_Mistral_extracted_number	Kuwait_Mistral_analysis	Kuwait_Mistral_normalized_probs	Lebanon_Mistral_full_answer	Lebanon_Mistral_extracted_number	Lebanon_Mistral_analysis	Lebanon_Mistral_normalized_probs	Libya_Mistral_full_answer	Libya_Mistral_extracted_number	Libya_Mistral_analysis
[truncated: 200 more rows]
[truncated: 33 more columns]

[truncated: 1 more sheets: Third Diff]
