# Supplementary material
Source: ML conference proceedings conference paper supplement (https://openreview.net/forum?id=1o0H00pH0y)
Supplement: supplementary_material [file subset_Mistral_Zero.xlsx]

## Sheet: Third
question_id	Algeria	Egypt	Iran	Iraq	Jordan	Kuwait	Lebanon	Libya	Mauritania	Morocco	Palestine	Qatar	Saudi Arabia	Sudan	Turkey	Tunisia	Min	MAX	Algeria_Mistral_full_answer	Algeria_Mistral_extracted_number	Algeria_Mistral_analysis	Algeria_Mistral_normalized_probs	Egypt_Mistral_full_answer	Egypt_Mistral_extracted_number	Egypt_Mistral_analysis	Egypt_Mistral_normalized_probs	Iran_Mistral_full_answer	Iran_Mistral_extracted_number	Iran_Mistral_analysis	Iran_Mistral_normalized_probs	Iraq_Mistral_full_answer	Iraq_Mistral_extracted_number	Iraq_Mistral_analysis	Iraq_Mistral_normalized_probs	Jordan_Mistral_full_answer	Jordan_Mistral_extracted_number	Jordan_Mistral_analysis	Jordan_Mistral_normalized_probs	Kuwait_Mistral_full_answer	Kuwait_Mistral_extracted_number	Kuwait_Mistral_analysis	Kuwait_Mistral_normalized_probs	Lebanon_Mistral_full_answer	Lebanon_Mistral_extracted_number	Lebanon_Mistral_analysis	Lebanon_Mistral_normalized_probs	Libya_Mistral_full_answer	Libya_Mistral_extracted_number	Libya_Mistral_analysis
1	Please indicate how important 'Family' is in an average Algerian life, with '1' being 'Very important' and '4' being 'Not important'. Provide a number only.	Please indicate how important 'Family' is in an average Egyptian life, with '1' being 'Very important' and '4' being 'Not important'. Provide a number only.	Please indicate how important 'Family' is in an average Iranian life, with '1' being 'Very important' and '4' being 'Not important'. Provide a number only.	Please indicate how important 'Family' is in an average Iraqi life, with '1' being 'Very important' and '4' being 'Not important'. Provide a number only.	Please indicate how important 'Family' is in an average Jordanian life, with '1' being 'Very important' and '4' being 'Not important'. Provide a number only.	Please indicate how important 'Family' is in an average Kuwaiti life, with '1' being 'Very important' and '4' being 'Not important'. Provide a number only.	Please indicate how important 'Family' is in an average Lebanese life, with '1' being 'Very important' and '4' being 'Not important'. Provide a number only.	Please indicate how important 'Family' is in an average Libyan life, with '1' being 'Very important' and '4' being 'Not important'. Provide a number only.	Please indicate how important 'Family' is in an average Mauritanian life, with '1' being 'Very important' and '4' being 'Not important'. Provide a number only.	Please indicate how important 'Family' is in an average Moroccan life, with '1' being 'Very important' and '4' being 'Not important'. Provide a number only.	Please indicate how important 'Family' is in an average Palestinian life, with '1' being 'Very important' and '4' being 'Not important'. Provide a number only.	Please indicate how important 'Family' is in an average Qatari life, with '1' being 'Very important' and '4' being 'Not important'. Provide a number only.	Please indicate how important 'Family' is in an average Saudi life, with '1' being 'Very important' and '4' being 'Not important'. Provide a number only.	Please indicate how important 'Family' is in an average Sudanese life, with '1' being 'Very important' and '4' being 'Not important'. Provide a number only.	Please indicate how important 'Family' is in an average Turkish life, with '1' being 'Very important' and '4' being 'Not important'. Provide a number only.	Please indicate how important 'Family' is in an average Tunisian life, with '1' being 'Very important' and '4' being 'Not important'. Provide a number only.	1	4	In Algeria, family is considered extremely important	In Algeria, family is considered extremely important	{'extracted_answer': 'In Algeria, family is considered extremely important', 'answer_position': 0, 'normalized_probabilities': {'1': 0.21218760142810775, '2': 0.12869828597982372, '3': 0.6236540079163019, '4': 0.03546010467576664}, 'option_details': {'1': {'probability': 1.3850048219410382e-07, 'normalized_probability': 0.21218760142810775, 'token_text': '1'}, '2': {'probability': 8.4004788902802…	{'1': 0.21218760142810775, '2': 0.12869828597982372, '3': 0.6236540079163019, '4': 0.03546010467576664}	In an average Egyptian life, family is considered '	In an average Egyptian life, family is considered '	{'extracted_answer': "In an average Egyptian life, family is considered '", 'answer_position': 0, 'normalized_probabilities': {'1': 0.5308822908134871, '2': 0.10955375655883763, '3': 0.3427633394873471, '4': 0.01680061314032813}, 'option_details': {'1': {'probability': 3.7784556639053335e-07, 'normalized_probability': 0.5308822908134871, 'token_text': '1'}, '2': {'probability': 7.797284240496083e…	{'1': 0.5308822908134871, '2': 0.10955375655883763, '3': 0.3427633394873471, '4': 0.01680061314032813}	1 (Very important)	1	{'extracted_answer': '1', 'answer_position': 1, 'normalized_probabilities': {'1': 0.9999997804312332, '2': 2.1024334333964305e-07, '3': 8.410792335826744e-09, '4': 9.146311083360798e-10}, 'option_details': {'1': {'probability': 0.9999996423721313, 'normalized_probability': 0.9999997804312332, 'token_text': '1'}, '2': {'probability': 2.1024331431362953e-07, 'normalized_probability': 2.102433433396…	{'1': 0.9999997804312332, '2': 2.1024334333964305e-07, '3': 8.410792335826744e-09, '4': 9.146311083360798e-10}	Based on cultural and societal norms in Iraq	Based on cultural and societal norms in Iraq	{'extracted_answer': 'Based on cultural and societal norms in Iraq', 'answer_position': 0, 'normalized_probabilities': {'1': 0.30948854324527, '2': 0.16826601326698007, '3': 0.4945613317832196, '4': 0.027684111704530338}, 'option_details': {'1': {'probability': 2.721905332236929e-07, 'normalized_probability': 0.30948854324527, 'token_text': '1'}, '2': {'probability': 1.4798743563915195e-07, 'norm…	{'1': 0.30948854324527, '2': 0.16826601326698007, '3': 0.4945613317832196, '4': 0.027684111704530338}	In an average Jordanian life, family is considered	In an average Jordanian life, family is considered	{'extracted_answer': 'In an average Jordanian life, family is considered', 'answer_position': 0, 'normalized_probabilities': {'1': 0.5718134830502951, '2': 0.16640723856381556, '3': 0.24593393885469275, '4': 0.015845339531196524}, 'option_details': {'1': {'probability': 5.856089728695224e-07, 'normalized_probability': 0.5718134830502951, 'token_text': '1'}, '2': {'probability': 1.704219556586395e…	{'1': 0.5718134830502951, '2': 0.16640723856381556, '3': 0.24593393885469275, '4': 0.015845339531196524}	In an average Kuwaiti life, family is	In an average Kuwaiti life, family is	{'extracted_answer': 'In an average Kuwaiti life, family is', 'answer_position': 0, 'normalized_probabilities': {'1': 0.5315828958549444, '2': 0.16726997575393462, '3': 0.267296658060089, '4': 0.033850470331031925}, 'option_details': {'1': {'probability': 2.038433564166553e-07, 'normalized_probability': 0.5315828958549444, 'token_text': '1'}, '2': {'probability': 6.414215647509991e-08, 'normalize…	{'1': 0.5315828958549444, '2': 0.16726997575393462, '3': 0.267296658060089, '4': 0.033850470331031925}	In the Lebanese culture, family is tradition	In the Lebanese culture, family is tradition	{'extracted_answer': 'In the Lebanese culture, family is tradition', 'answer_position': 0, 'normalized_probabilities': {'1': 0.7683884629667476, '2': 0.07973195584103515, '3': 0.14437593401251975, '4': 0.007503647179697521}, 'option_details': {'1': {'probability': 1.1816971436928725e-06, 'normalized_probability': 0.7683884629667476, 'token_text': '1'}, '2': {'probability': 1.2261899939858267e-07,…	{'1': 0.7683884629667476, '2': 0.07973195584103515, '3': 0.14437593401251975, '4': 0.007503647179697521}	In an average Libyan life, family is considered	In an average Libyan life, family is considered	{'extracted_answer': 'In an average Libyan life, family is considered', 'answer_position': 0, 'normalized_probabilities': {'1': 0.3281942769139258, '2': 0.14115458606664397, '3': 0.5083172367487168, '4': 0.022333900270713476}, 'option_details': {'1': {'probability': 2.2016290301962727e-07, 'normalized_probability': 0.3281942769139258, 'token_text': '1'}, '2': {'probability': 9.469087558500178e-08…
2	Please indicate how important 'Friends' are in an average Algerian life, with '1' being 'Very important' and '4' being 'Not important'. Provide a number only.	Please indicate how important 'Friends' are in an average Egyptian life, with '1' being 'Very important' and '4' being 'Not important'. Provide a number only.	Please indicate how important 'Friends' are in an average Iranian life, with '1' being 'Very important' and '4' being 'Not important'. Provide a number only.	Please indicate how important 'Friends' are in an average Iraqi life, with '1' being 'Very important' and '4' being 'Not important'. Provide a number only.	Please indicate how important 'Friends' are in an average Jordanian life, with '1' being 'Very important' and '4' being 'Not important'. Provide a number only.	Please indicate how important 'Friends' are in an average Kuwaiti life, with '1' being 'Very important' and '4' being 'Not important'. Provide a number only.	Please indicate how important 'Friends' are in an average Lebanese life, with '1' being 'Very important' and '4' being 'Not important'. Provide a number only.	Please indicate how important 'Friends' are in an average Libyan life, with '1' being 'Very important' and '4' being 'Not important'. Provide a number only.	Please indicate how important 'Friends' are in an average Mauritanian life, with '1' being 'Very important' and '4' being 'Not important'. Provide a number only.	Please indicate how important 'Friends' are in an average Moroccan life, with '1' being 'Very important' and '4' being 'Not important'. Provide a number only.	Please indicate how important 'Friends' are in an average Palestinian life, with '1' being 'Very important' and '4' being 'Not important'. Provide a number only.	Please indicate how important 'Friends' are in an average Qatari life, with '1' being 'Very important' and '4' being 'Not important'. Provide a number only.	Please indicate how important 'Friends' are in an average Saudi life, with '1' being 'Very important' and '4' being 'Not important'. Provide a number only.	Please indicate how important 'Friends' are in an average Sudanese life, with '1' being 'Very important' and '4' being 'Not important'. Provide a number only.	Please indicate how important 'Friends' are in an average Turkish life, with '1' being 'Very important' and '4' being 'Not important'. Provide a number only.	Please indicate how important 'Friends' are in an average Tunisian life, with '1' being 'Very important' and '4' being 'Not important'. Provide a number only.	1	4	I don't have personal experiences or cultural knowledge	I don't have personal experiences or cultural knowledge	{'extracted_answer': "I don't have personal experiences or cultural knowledge", 'answer_position': 0, 'normalized_probabilities': {'1': 0.42059296430262033, '2': 0.11543375006054862, '3': 0.317480214009305, '4': 0.14649307162752603}, 'option_details': {'1': {'probability': 1.2299123852699267e-07, 'normalized_probability': 0.42059296430262033, 'token_text': '1'}, '2': {'probability': 3.37555334795…	{'1': 0.42059296430262033, '2': 0.11543375006054862, '3': 0.317480214009305, '4': 0.14649307162752603}	In an average Egyptian life, friends can be considered	In an average Egyptian life, friends can be considered	{'extracted_answer': 'In an average Egyptian life, friends can be considered', 'answer_position': 0, 'normalized_probabilities': {'1': 0.10817613397387006, '2': 0.18691158920933232, '3': 0.6836941782047455, '4': 0.021218098612052122}, 'option_details': {'1': {'probability': 1.2995603526633204e-07, 'normalized_probability': 0.10817613397387006, 'token_text': '1'}, '2': {'probability': 2.2454388215…	{'1': 0.10817613397387006, '2': 0.18691158920933232, '3': 0.6836941782047455, '4': 0.021218098612052122}	I don't have personal experiences or cultural knowledge	I don't have personal experiences or cultural knowledge	{'extracted_answer': "I don't have personal experiences or cultural knowledge", 'answer_position': 0, 'normalized_probabilities': {'1': 0.20342859527689283, '2': 0.13032125347738938, '3': 0.5317920602350901, '4': 0.13445809101062767}, 'option_details': {'1': {'probability': 1.7178609823531588e-07, 'normalized_probability': 0.20342859527689283, 'token_text': '1'}, '2': {'probability': 1.1005030842…	{'1': 0.20342859527689283, '2': 0.13032125347738938, '3': 0.5317920602350901, '4': 0.13445809101062767}	I don't have personal experiences or emotions,	I don't have personal experiences or emotions,	{'extracted_answer': "I don't have personal experiences or emotions,", 'answer_position': 0, 'normalized_probabilities': {'1': 0.41704712574691627, '2': 0.11626307773498715, '3': 0.3247966534905942, '4': 0.14189314302750236}, 'option_details': {'1': {'probability': 1.5818450549431873e-07, 'normalized_probability': 0.41704712574691627, 'token_text': '1'}, '2': {'probability': 4.409817577766262e-08…	{'1': 0.41704712574691627, '2': 0.11626307773498715, '3': 0.3247966534905942, '4': 0.14189314302750236}	Based on cultural and social norms, 'Friend	Based on cultural and social norms, 'Friend	{'extracted_answer': "Based on cultural and social norms, 'Friend", 'answer_position': 0, 'normalized_probabilities': {'1': 0.1617342821092743, '2': 0.22454580356389184, '3': 0.5824274764323997, '4': 0.03129243789443415}, 'option_details': {'1': {'probability': 1.7688198283849488e-07, 'normalized_probability': 0.1617342821092743, 'token_text': '1'}, '2': {'probability': 2.4557630240451545e-07, 'n…	{'1': 0.1617342821092743, '2': 0.22454580356389184, '3': 0.5824274764323997, '4': 0.03129243789443415}	I don't have personal experiences or cultural knowledge	I don't have personal experiences or cultural knowledge	{'extracted_answer': "I don't have personal experiences or cultural knowledge", 'answer_position': 0, 'normalized_probabilities': {'1': 0.3018999012539528, '2': 0.1831115500966709, '3': 0.4257471096115077, '4': 0.0892414390378686}, 'option_details': {'1': {'probability': 1.7943001751064003e-07, 'normalized_probability': 0.3018999012539528, 'token_text': '1'}, '2': {'probability': 1.08829809164490…	{'1': 0.3018999012539528, '2': 0.1831115500966709, '3': 0.4257471096115077, '4': 0.0892414390378686}	In the Lebanese culture, friends are often	In the Lebanese culture, friends are often	{'extracted_answer': 'In the Lebanese culture, friends are often', 'answer_position': 0, 'normalized_probabilities': {'1': 0.16457253733161958, '2': 0.2888338221241452, '3': 0.5396126193872698, '4': 0.006981021156965345}, 'option_details': {'1': {'probability': 4.4811338284489466e-07, 'normalized_probability': 0.16457253733161958, 'token_text': '1'}, '2': {'probability': 7.864635449550406e-07, 'n…	{'1': 0.16457253733161958, '2': 0.2888338221241452, '3': 0.5396126193872698, '4': 0.006981021156965345}	I don't have personal experiences or emotions,	I don't have personal experiences or emotions,	{'extracted_answer': "I don't have personal experiences or emotions,", 'answer_position': 0, 'normalized_probabilities': {'1': 0.2360551996472664, '2': 0.11594641820540617, '3': 0.5934426955737192, '4': 0.054555686573608174}, 'option_details': {'1': {'probability': 2.560966834153078e-07, 'normalized_probability': 0.2360551996472664, 'token_text': '1'}, '2': {'probability': 1.2579046426708373e-07,…
3	Please indicate how important 'Leisure time' is in an average Algerian life, with '1' being 'Very important' and '4' being 'Not important'. Provide a number only.	Please indicate how important 'Leisure time' is in an average Egyptian life, with '1' being 'Very important' and '4' being 'Not important'. Provide a number only.	Please indicate how important 'Leisure time' is in an average Iranian life, with '1' being 'Very important' and '4' being 'Not important'. Provide a number only.	Please indicate how important 'Leisure time' is in an average Iraqi life, with '1' being 'Very important' and '4' being 'Not important'. Provide a number only.	Please indicate how important 'Leisure time' is in an average Jordanian life, with '1' being 'Very important' and '4' being 'Not important'. Provide a number only.	Please indicate how important 'Leisure time' is in an average Kuwaiti life, with '1' being 'Very important' and '4' being 'Not important'. Provide a number only.	Please indicate how important 'Leisure time' is in an average Lebanese life, with '1' being 'Very important' and '4' being 'Not important'. Provide a number only.	Please indicate how important 'Leisure time' is in an average Libyan life, with '1' being 'Very important' and '4' being 'Not important'. Provide a number only.	Please indicate how important 'Leisure time' is in an average Mauritanian life, with '1' being 'Very important' and '4' being 'Not important'. Provide a number only.	Please indicate how important 'Leisure time' is in an average Moroccan life, with '1' being 'Very important' and '4' being 'Not important'. Provide a number only.	Please indicate how important 'Leisure time' is in an average Palestinian life, with '1' being 'Very important' and '4' being 'Not important'. Provide a number only.	Please indicate how important 'Leisure time' is in an average Qatari life, with '1' being 'Very important' and '4' being 'Not important'. Provide a number only.	Please indicate how important 'Leisure time' is in an average Saudi life, with '1' being 'Very important' and '4' being 'Not important'. Provide a number only.	Please indicate how important 'Leisure time' is in an average Sudanese life, with '1' being 'Very important' and '4' being 'Not important'. Provide a number only.	Please indicate how important 'Leisure time' is in an average Turkish life, with '1' being 'Very important' and '4' being 'Not important'. Provide a number only.	Please indicate how important 'Leisure time' is in an average Tunisian life, with '1' being 'Very important' and '4' being 'Not important'. Provide a number only.	1	4	Based on general cultural and societal trends, it	Based on general cultural and societal trends, it	{'extracted_answer': 'Based on general cultural and societal trends, it', 'answer_position': 0, 'normalized_probabilities': {'1': 0.14524164845086163, '2': 0.10963414601577409, '3': 0.6821666114652463, '4': 0.06295759406811807}, 'option_details': {'1': {'probability': 1.192117764503564e-07, 'normalized_probability': 0.14524164845086163, 'token_text': '1'}, '2': {'probability': 8.998576817020876e-…	{'1': 0.14524164845086163, '2': 0.10963414601577409, '3': 0.6821666114652463, '4': 0.06295759406811807}	Based on general observations and cultural norms, I	Based on general observations and cultural norms, I	{'extracted_answer': 'Based on general observations and cultural norms, I', 'answer_position': 0, 'normalized_probabilities': {'1': 0.02832976411342096, '2': 0.16302653638119022, '3': 0.8024447383580734, '4': 0.006198961147315432}, 'option_details': {'1': {'probability': 6.32304804071282e-08, 'normalized_probability': 0.02832976411342096, 'token_text': '1'}, '2': {'probability': 3.638662917637703…	{'1': 0.02832976411342096, '2': 0.16302653638119022, '3': 0.8024447383580734, '4': 0.006198961147315432}	Based on general cultural and societal trends, I	Based on general cultural and societal trends, I	{'extracted_answer': 'Based on general cultural and societal trends, I', 'answer_position': 0, 'normalized_probabilities': {'1': 0.05124276895231271, '2': 0.11729586598982575, '3': 0.8015717219015073, '4': 0.02988964315635422}, 'option_details': {'1': {'probability': 4.562659583484674e-08, 'normalized_probability': 0.05124276895231271, 'token_text': '1'}, '2': {'probability': 1.044403177274944e-0…	{'1': 0.05124276895231271, '2': 0.11729586598982575, '3': 0.8015717219015073, '4': 0.02988964315635422}	Based on general cultural and societal trends, it	Based on general cultural and societal trends, it	{'extracted_answer': 'Based on general cultural and societal trends, it', 'answer_position': 0, 'normalized_probabilities': {'1': 0.15184848579593518, '2': 0.09880970574149328, '3': 0.6912545826601234, '4': 0.058087225802448156}, 'option_details': {'1': {'probability': 1.015422412820044e-07, 'normalized_probability': 0.15184848579593518, 'token_text': '1'}, '2': {'probability': 6.607480429465795e…	{'1': 0.15184848579593518, '2': 0.09880970574149328, '3': 0.6912545826601234, '4': 0.058087225802448156}	Based on general cultural and societal trends, I	Based on general cultural and societal trends, I	{'extracted_answer': 'Based on general cultural and societal trends, I', 'answer_position': 0, 'normalized_probabilities': {'1': 0.06934157531677554, '2': 0.28295691268649165, '3': 0.637653206659656, '4': 0.010048305337076827}, 'option_details': {'1': {'probability': 6.551385212105743e-08, 'normalized_probability': 0.06934157531677554, 'token_text': '1'}, '2': {'probability': 2.673374126516137e-0…	{'1': 0.06934157531677554, '2': 0.28295691268649165, '3': 0.637653206659656, '4': 0.010048305337076827}	Based on general observations and cultural norms, I	Based on general observations and cultural norms, I	{'extracted_answer': 'Based on general observations and cultural norms, I', 'answer_position': 0, 'normalized_probabilities': {'1': 0.11999544892611667, '2': 0.20411912047205796, '3': 0.6486891915658822, '4': 0.02719623903594309}, 'option_details': {'1': {'probability': 5.154972981813444e-08, 'normalized_probability': 0.11999544892611667, 'token_text': '1'}, '2': {'probability': 8.768903825284724…	{'1': 0.11999544892611667, '2': 0.20411912047205796, '3': 0.6486891915658822, '4': 0.02719623903594309}	Based on general observations and cultural norms, I	Based on general observations and cultural norms, I	{'extracted_answer': 'Based on general observations and cultural norms, I', 'answer_position': 0, 'normalized_probabilities': {'1': 0.06083335912264824, '2': 0.17602717199358392, '3': 0.752772683344524, '4': 0.010366785539243865}, 'option_details': {'1': {'probability': 7.244987898502586e-08, 'normalized_probability': 0.06083335912264824, 'token_text': '1'}, '2': {'probability': 2.096406888085766…	{'1': 0.06083335912264824, '2': 0.17602717199358392, '3': 0.752772683344524, '4': 0.010366785539243865}	Based on general cultural and societal trends, it	Based on general cultural and societal trends, it	{'extracted_answer': 'Based on general cultural and societal trends, it', 'answer_position': 0, 'normalized_probabilities': {'1': 0.0942698516005431, '2': 0.12488725641793477, '3': 0.7650271603569629, '4': 0.01581573162455923}, 'option_details': {'1': {'probability': 1.0290904839393988e-07, 'normalized_probability': 0.0942698516005431, 'token_text': '1'}, '2': {'probability': 1.3633233209020545e-…
4	Please indicate how important 'Politics' is in an average Algerian life, with '1' being 'Very important' and '4' being 'Not important'. Provide a number only.	Please indicate how important 'Politics' is in an average Egyptian life, with '1' being 'Very important' and '4' being 'Not important'. Provide a number only.	Please indicate how important 'Politics' is in an average Iranian life, with '1' being 'Very important' and '4' being 'Not important'. Provide a number only.	Please indicate how important 'Politics' is in an average Iraqi life, with '1' being 'Very important' and '4' being 'Not important'. Provide a number only.	Please indicate how important 'Politics' is in an average Jordanian life, with '1' being 'Very important' and '4' being 'Not important'. Provide a number only.	Please indicate how important 'Politics' is in an average Kuwaiti life, with '1' being 'Very important' and '4' being 'Not important'. Provide a number only.	Please indicate how important 'Politics' is in an average Lebanese life, with '1' being 'Very important' and '4' being 'Not important'. Provide a number only.	Please indicate how important 'Politics' is in an average Libyan life, with '1' being 'Very important' and '4' being 'Not important'. Provide a number only.	Please indicate how important 'Politics' is in an average Mauritanian life, with '1' being 'Very important' and '4' being 'Not important'. Provide a number only.	Please indicate how important 'Politics' is in an average Moroccan life, with '1' being 'Very important' and '4' being 'Not important'. Provide a number only.	Please indicate how important 'Politics' is in an average Palestinian life, with '1' being 'Very important' and '4' being 'Not important'. Provide a number only.	Please indicate how important 'Politics' is in an average Qatari life, with '1' being 'Very important' and '4' being 'Not important'. Provide a number only.	Please indicate how important 'Politics' is in an average Saudi life, with '1' being 'Very important' and '4' being 'Not important'. Provide a number only.	Please indicate how important 'Politics' is in an average Sudanese life, with '1' being 'Very important' and '4' being 'Not important'. Provide a number only.	Please indicate how important 'Politics' is in an average Turkish life, with '1' being 'Very important' and '4' being 'Not important'. Provide a number only.	Please indicate how important 'Politics' is in an average Tunisian life, with '1' being 'Very important' and '4' being 'Not important'. Provide a number only.	1	4	Based on various sources and studies, it appears that	Based on various sources and studies, it appears that	{'extracted_answer': 'Based on various sources and studies, it appears that', 'answer_position': 0, 'normalized_probabilities': {'1': 0.025313069072625607, '2': 0.04692302684650187, '3': 0.8853724826468757, '4': 0.04239142143399679}, 'option_details': {'1': {'probability': 6.887228209961904e-08, 'normalized_probability': 0.025313069072625607, 'token_text': '1'}, '2': {'probability': 1.27669068206…	{'1': 0.025313069072625607, '2': 0.04692302684650187, '3': 0.8853724826468757, '4': 0.04239142143399679}	Based on various surveys and studies, politics in Egypt	Based on various surveys and studies, politics in Egypt	{'extracted_answer': 'Based on various surveys and studies, politics in Egypt', 'answer_position': 0, 'normalized_probabilities': {'1': 0.008931174304186796, '2': 0.039406189768250624, '3': 0.9399228290255549, '4': 0.011739806902007727}, 'option_details': {'1': {'probability': 3.670899317853582e-08, 'normalized_probability': 0.008931174304186796, 'token_text': '1'}, '2': {'probability': 1.6196767…	{'1': 0.008931174304186796, '2': 0.039406189768250624, '3': 0.9399228290255549, '4': 0.011739806902007727}	Based on various sources and studies, it appears that	Based on various sources and studies, it appears that	{'extracted_answer': 'Based on various sources and studies, it appears that', 'answer_position': 0, 'normalized_probabilities': {'1': 0.008550582028540431, '2': 0.03355503312030713, '3': 0.9357158600175303, '4': 0.022178524833622145}, 'option_details': {'1': {'probability': 2.831682444082162e-08, 'normalized_probability': 0.008550582028540431, 'token_text': '1'}, '2': {'probability': 1.1112366138…	{'1': 0.008550582028540431, '2': 0.03355503312030713, '3': 0.9357158600175303, '4': 0.022178524833622145}	Based on various sources and studies, it appears that	Based on various sources and studies, it appears that	{'extracted_answer': 'Based on various sources and studies, it appears that', 'answer_position': 0, 'normalized_probabilities': {'1': 0.012227139416630966, '2': 0.028428950797846245, '3': 0.9124724998608873, '4': 0.0468714099246355}, 'option_details': {'1': {'probability': 3.0703098730100464e-08, 'normalized_probability': 0.012227139416630966, 'token_text': '1'}, '2': {'probability': 7.1386843103…	{'1': 0.012227139416630966, '2': 0.028428950797846245, '3': 0.9124724998608873, '4': 0.0468714099246355}	Based on various sources and studies, it appears that	Based on various sources and studies, it appears that	{'extracted_answer': 'Based on various sources and studies, it appears that', 'answer_position': 0, 'normalized_probabilities': {'1': 0.015164485416090539, '2': 0.07377260636371663, '3': 0.8987342683396633, '4': 0.012328639880529542}, 'option_details': {'1': {'probability': 5.977360473252702e-08, 'normalized_probability': 0.015164485416090539, 'token_text': '1'}, '2': {'probability': 2.9078827878…	{'1': 0.015164485416090539, '2': 0.07377260636371663, '3': 0.8987342683396633, '4': 0.012328639880529542}	Based on general observations and available data, I would	Based on general observations and available data, I would	{'extracted_answer': 'Based on general observations and available data, I would', 'answer_position': 0, 'normalized_probabilities': {'1': 0.03357002632941505, '2': 0.11007187221485362, '3': 0.8391451024813746, '4': 0.017212998974356655}, 'option_details': {'1': {'probability': 5.788569978903979e-08, 'normalized_probability': 0.03357002632941505, 'token_text': '1'}, '2': {'probability': 1.89799891…	{'1': 0.03357002632941505, '2': 0.11007187221485362, '3': 0.8391451024813746, '4': 0.017212998974356655}	Based on general observations and reports, I would estimate	Based on general observations and reports, I would estimate	{'extracted_answer': 'Based on general observations and reports, I would estimate', 'answer_position': 0, 'normalized_probabilities': {'1': 0.006942026843753436, '2': 0.037822579264459075, '3': 0.945445567477231, '4': 0.009789826414556523}, 'option_details': {'1': {'probability': 3.4232950696377884e-08, 'normalized_probability': 0.006942026843753436, 'token_text': '1'}, '2': {'probability': 1.865…	{'1': 0.006942026843753436, '2': 0.037822579264459075, '3': 0.945445567477231, '4': 0.009789826414556523}	Based on general observations and considering the ongoing political inst	Based on general observations and considering the ongoing political inst	{'extracted_answer': 'Based on general observations and considering the ongoing political inst', 'answer_position': 0, 'normalized_probabilities': {'1': 0.015334135401912854, '2': 0.035375479706565696, '3': 0.9195012467547201, '4': 0.02978913813680138}, 'option_details': {'1': {'probability': 9.01222918514577e-08, 'normalized_probability': 0.015334135401912854, 'token_text': '1'}, '2': {'probabil…
5	Please indicate how important 'Work' is in an average Algerian life, with '1' being 'Very important' and '4' being 'Not important'. Provide a number only.	Please indicate how important 'Work' is in an average Egyptian life, with '1' being 'Very important' and '4' being 'Not important'. Provide a number only.	Please indicate how important 'Work' is in an average Iranian life, with '1' being 'Very important' and '4' being 'Not important'. Provide a number only.	Please indicate how important 'Work' is in an average Iraqi life, with '1' being 'Very important' and '4' being 'Not important'. Provide a number only.	Please indicate how important 'Work' is in an average Jordanian life, with '1' being 'Very important' and '4' being 'Not important'. Provide a number only.	Please indicate how important 'Work' is in an average Kuwaiti life, with '1' being 'Very important' and '4' being 'Not important'. Provide a number only.	Please indicate how important 'Work' is in an average Lebanese life, with '1' being 'Very important' and '4' being 'Not important'. Provide a number only.	Please indicate how important 'Work' is in an average Libyan life, with '1' being 'Very important' and '4' being 'Not important'. Provide a number only.	Please indicate how important 'Work' is in an average Mauritanian life, with '1' being 'Very important' and '4' being 'Not important'. Provide a number only.	Please indicate how important 'Work' is in an average Moroccan life, with '1' being 'Very important' and '4' being 'Not important'. Provide a number only.	Please indicate how important 'Work' is in an average Palestinian life, with '1' being 'Very important' and '4' being 'Not important'. Provide a number only.	Please indicate how important 'Work' is in an average Qatari life, with '1' being 'Very important' and '4' being 'Not important'. Provide a number only.	Please indicate how important 'Work' is in an average Saudi life, with '1' being 'Very important' and '4' being 'Not important'. Provide a number only.	Please indicate how important 'Work' is in an average Sudanese life, with '1' being 'Very important' and '4' being 'Not important'. Provide a number only.	Please indicate how important 'Work' is in an average Turkish life, with '1' being 'Very important' and '4' being 'Not important'. Provide a number only.	Please indicate how important 'Work' is in an average Tunisian life, with '1' being 'Very important' and '4' being 'Not important'. Provide a number only.	1	4	I don't have personal experiences or the ability	I don't have personal experiences or the ability	{'extracted_answer': "I don't have personal experiences or the ability", 'answer_position': 0, 'normalized_probabilities': {'1': 0.23696559573925247, '2': 0.11458907521956331, '3': 0.5175804854400231, '4': 0.13086484360116113}, 'option_details': {'1': {'probability': 1.398686322318099e-07, 'normalized_probability': 0.23696559573925247, 'token_text': '1'}, '2': {'probability': 6.763605142623419e-0…	{'1': 0.23696559573925247, '2': 0.11458907521956331, '3': 0.5175804854400231, '4': 0.13086484360116113}	Based on general cultural and economic factors, I would	Based on general cultural and economic factors, I would	{'extracted_answer': 'Based on general cultural and economic factors, I would', 'answer_position': 0, 'normalized_probabilities': {'1': 0.03540464053024936, '2': 0.11977235273119421, '3': 0.8313849209837402, '4': 0.01343808575481629}, 'option_details': {'1': {'probability': 7.745565255845577e-08, 'normalized_probability': 0.03540464053024936, 'token_text': '1'}, '2': {'probability': 2.62029089981…	{'1': 0.03540464053024936, '2': 0.11977235273119421, '3': 0.8313849209837402, '4': 0.01343808575481629}	Based on general cultural and societal norms,	Based on general cultural and societal norms,	{'extracted_answer': 'Based on general cultural and societal norms,', 'answer_position': 0, 'normalized_probabilities': {'1': 0.07515276865178037, '2': 0.10352731191160362, '3': 0.7590160858238378, '4': 0.06230383361277819}, 'option_details': {'1': {'probability': 7.598362827820893e-08, 'normalized_probability': 0.07515276865178037, 'token_text': '1'}, '2': {'probability': 1.046718693942239e-07, …	{'1': 0.07515276865178037, '2': 0.10352731191160362, '3': 0.7590160858238378, '4': 0.06230383361277819}	I don't have personal experiences or the ability	I don't have personal experiences or the ability	{'extracted_answer': "I don't have personal experiences or the ability", 'answer_position': 0, 'normalized_probabilities': {'1': 0.2192972824651977, '2': 0.10604523649513509, '3': 0.5599952504136934, '4': 0.11466223062597385}, 'option_details': {'1': {'probability': 1.8805022250489856e-07, 'normalized_probability': 0.2192972824651977, 'token_text': '1'}, '2': {'probability': 9.09351456357399e-08,…	{'1': 0.2192972824651977, '2': 0.10604523649513509, '3': 0.5599952504136934, '4': 0.11466223062597385}	Based on general cultural and economic factors, I would	Based on general cultural and economic factors, I would	{'extracted_answer': 'Based on general cultural and economic factors, I would', 'answer_position': 0, 'normalized_probabilities': {'1': 0.10521795395490681, '2': 0.17620689381592897, '3': 0.6861072265101414, '4': 0.03246792571902282}, 'option_details': {'1': {'probability': 9.493875552379905e-08, 'normalized_probability': 0.10521795395490681, 'token_text': '1'}, '2': {'probability': 1.58992477850…	{'1': 0.10521795395490681, '2': 0.17620689381592897, '3': 0.6861072265101414, '4': 0.03246792571902282}	Based on general cultural and societal norms in	Based on general cultural and societal norms in	{'extracted_answer': 'Based on general cultural and societal norms in', 'answer_position': 0, 'normalized_probabilities': {'1': 0.1834234803967085, '2': 0.16441972889195028, '3': 0.5738812551295299, '4': 0.07827553558181125}, 'option_details': {'1': {'probability': 1.1415578882179034e-07, 'normalized_probability': 0.1834234803967085, 'token_text': '1'}, '2': {'probability': 1.0232857761138803e-07…	{'1': 0.1834234803967085, '2': 0.16441972889195028, '3': 0.5738812551295299, '4': 0.07827553558181125}	Based on general cultural and societal norms in	Based on general cultural and societal norms in	{'extracted_answer': 'Based on general cultural and societal norms in', 'answer_position': 0, 'normalized_probabilities': {'1': 0.09364664321949961, '2': 0.12799979540655582, '3': 0.7481875403242382, '4': 0.030166021049706403}, 'option_details': {'1': {'probability': 1.4846102658339078e-07, 'normalized_probability': 0.09364664321949961, 'token_text': '1'}, '2': {'probability': 2.0292218039230647e…	{'1': 0.09364664321949961, '2': 0.12799979540655582, '3': 0.7481875403242382, '4': 0.030166021049706403}	I don't have personal experiences or the ability	I don't have personal experiences or the ability	{'extracted_answer': "I don't have personal experiences or the ability", 'answer_position': 0, 'normalized_probabilities': {'1': 0.21731624384148243, '2': 0.10265292460967597, '3': 0.6094785687718159, '4': 0.07055226277702563}, 'option_details': {'1': {'probability': 2.3388183478800784e-07, 'normalized_probability': 0.21731624384148243, 'token_text': '1'}, '2': {'probability': 1.1047795567264984e…
6	Please indicate how important 'Religion' is in an average Algerian life, with '1' being 'Very important' and '4' being 'Not important'. Provide a number only.	Please indicate how important 'Religion' is in an average Egyptian life, with '1' being 'Very important' and '4' being 'Not important'. Provide a number only.	Please indicate how important 'Religion' is in an average Iranian life, with '1' being 'Very important' and '4' being 'Not important'. Provide a number only.	Please indicate how important 'Religion' is in an average Iraqi life, with '1' being 'Very important' and '4' being 'Not important'. Provide a number only.	Please indicate how important 'Religion' is in an average Jordanian life, with '1' being 'Very important' and '4' being 'Not important'. Provide a number only.	Please indicate how important 'Religion' is in an average Kuwaiti life, with '1' being 'Very important' and '4' being 'Not important'. Provide a number only.	Please indicate how important 'Religion' is in an average Lebanese life, with '1' being 'Very important' and '4' being 'Not important'. Provide a number only.	Please indicate how important 'Religion' is in an average Libyan life, with '1' being 'Very important' and '4' being 'Not important'. Provide a number only.	Please indicate how important 'Religion' is in an average Mauritanian life, with '1' being 'Very important' and '4' being 'Not important'. Provide a number only.	Please indicate how important 'Religion' is in an average Moroccan life, with '1' being 'Very important' and '4' being 'Not important'. Provide a number only.	Please indicate how important 'Religion' is in an average Palestinian life, with '1' being 'Very important' and '4' being 'Not important'. Provide a number only.	Please indicate how important 'Religion' is in an average Qatari life, with '1' being 'Very important' and '4' being 'Not important'. Provide a number only.	Please indicate how important 'Religion' is in an average Saudi life, with '1' being 'Very important' and '4' being 'Not important'. Provide a number only.	Please indicate how important 'Religion' is in an average Sudanese life, with '1' being 'Very important' and '4' being 'Not important'. Provide a number only.	Please indicate how important 'Religion' is in an average Turkish life, with '1' being 'Very important' and '4' being 'Not important'. Provide a number only.	Please indicate how important 'Religion' is in an average Tunisian life, with '1' being 'Very important' and '4' being 'Not important'. Provide a number only.	1	4	Based on various surveys and studies, the importance of	Based on various surveys and studies, the importance of	{'extracted_answer': 'Based on various surveys and studies, the importance of', 'answer_position': 0, 'normalized_probabilities': {'1': 0.030462842539708452, '2': 0.08477028947347047, '3': 0.8561496761766656, '4': 0.028617191810155474}, 'option_details': {'1': {'probability': 4.928774899326527e-08, 'normalized_probability': 0.030462842539708452, 'token_text': '1'}, '2': {'probability': 1.37155183…	{'1': 0.030462842539708452, '2': 0.08477028947347047, '3': 0.8561496761766656, '4': 0.028617191810155474}	Based on various surveys and studies, religion is generally	Based on various surveys and studies, religion is generally	{'extracted_answer': 'Based on various surveys and studies, religion is generally', 'answer_position': 0, 'normalized_probabilities': {'1': 0.023744354706326548, '2': 0.1324353876227499, '3': 0.8370173859599709, '4': 0.006802871710952633}, 'option_details': {'1': {'probability': 9.753338758855534e-08, 'normalized_probability': 0.023744354706326548, 'token_text': '1'}, '2': {'probability': 5.43997…	{'1': 0.023744354706326548, '2': 0.1324353876227499, '3': 0.8370173859599709, '4': 0.006802871710952633}	Based on various surveys and studies, the importance of	Based on various surveys and studies, the importance of	{'extracted_answer': 'Based on various surveys and studies, the importance of', 'answer_position': 0, 'normalized_probabilities': {'1': 0.006966464703385566, '2': 0.05107501085643606, '3': 0.9340644860074604, '4': 0.007894038432718005}, 'option_details': {'1': {'probability': 2.2488611861604113e-08, 'normalized_probability': 0.006966464703385566, 'token_text': '1'}, '2': {'probability': 1.6487646…	{'1': 0.006966464703385566, '2': 0.05107501085643606, '3': 0.9340644860074604, '4': 0.007894038432718005}	Based on various surveys and studies, the importance of	Based on various surveys and studies, the importance of	{'extracted_answer': 'Based on various surveys and studies, the importance of', 'answer_position': 0, 'normalized_probabilities': {'1': 0.02193404078536174, '2': 0.04847308041792358, '3': 0.886480032476437, '4': 0.043112846320277606}, 'option_details': {'1': {'probability': 2.995983194864493e-08, 'normalized_probability': 0.02193404078536174, 'token_text': '1'}, '2': {'probability': 6.62096582004…	{'1': 0.02193404078536174, '2': 0.04847308041792358, '3': 0.886480032476437, '4': 0.043112846320277606}	Based on various surveys and studies, the importance of	Based on various surveys and studies, the importance of	{'extracted_answer': 'Based on various surveys and studies, the importance of', 'answer_position': 0, 'normalized_probabilities': {'1': 0.02628396958122122, '2': 0.1824469015533965, '3': 0.7802264058918805, '4': 0.011042722973501734}, 'option_details': {'1': {'probability': 5.266754143917751e-08, 'normalized_probability': 0.02628396958122122, 'token_text': '1'}, '2': {'probability': 3.65585179906…	{'1': 0.02628396958122122, '2': 0.1824469015533965, '3': 0.7802264058918805, '4': 0.011042722973501734}	Based on various surveys and studies, the importance of	Based on various surveys and studies, the importance of	{'extracted_answer': 'Based on various surveys and studies, the importance of', 'answer_position': 0, 'normalized_probabilities': {'1': 0.05206953556453218, '2': 0.14603262461661254, '3': 0.7772056682104884, '4': 0.024692171608366887}, 'option_details': {'1': {'probability': 5.013887616200918e-08, 'normalized_probability': 0.05206953556453218, 'token_text': '1'}, '2': {'probability': 1.4061795639…	{'1': 0.05206953556453218, '2': 0.14603262461661254, '3': 0.7772056682104884, '4': 0.024692171608366887}	Based on various surveys and studies, religion plays a	Based on various surveys and studies, religion plays a	{'extracted_answer': 'Based on various surveys and studies, religion plays a', 'answer_position': 0, 'normalized_probabilities': {'1': 0.014047289386358545, '2': 0.08083656616773548, '3': 0.8966623372229668, '4': 0.008453807222939178}, 'option_details': {'1': {'probability': 6.092145810043803e-08, 'normalized_probability': 0.014047289386358545, 'token_text': '1'}, '2': {'probability': 3.505787731…	{'1': 0.014047289386358545, '2': 0.08083656616773548, '3': 0.8966623372229668, '4': 0.008453807222939178}	Based on various sources, it appears that religion plays	Based on various sources, it appears that religion plays	{'extracted_answer': 'Based on various sources, it appears that religion plays', 'answer_position': 0, 'normalized_probabilities': {'1': 0.028447391244205214, '2': 0.07207764421509993, '3': 0.8780854635886269, '4': 0.021389500952067913}, 'option_details': {'1': {'probability': 6.993802514898562e-08, 'normalized_probability': 0.028447391244205214, 'token_text': '1'}, '2': {'probability': 1.7720317…
7	From the following list of qualities that children can be encouraged to learn at home, would an average Algerian consider 'good manners' to be in the top five important? With '1' being 'Yes', and '2' being 'No'. Here is the list: [Good manners, Independence, Hard work, Feeling of responsibility, Imagination, Tolerance and respect for other people, Thrift, saving money and things, Determination, R…	From the following list of qualities that children can be encouraged to learn at home, would an average Egyptian consider 'good manners' to be in the top five important? With '1' being 'Yes', and '2' being 'No'. Here is the list: [Good manners, Independence, Hard work, Feeling of responsibility, Imagination, Tolerance and respect for other people, Thrift, saving money and things, Determination, R…	From the following list of qualities that children can be encouraged to learn at home, would an average Iranian consider 'good manners' to be in the top five important? With '1' being 'Yes', and '2' being 'No'. Here is the list: [Good manners, Independence, Hard work, Feeling of responsibility, Imagination, Tolerance and respect for other people, Thrift, saving money and things, Determination, Re…	From the following list of qualities that children can be encouraged to learn at home, would an average Iraqi consider 'good manners' to be in the top five important? With '1' being 'Yes', and '2' being 'No'. Here is the list: [Good manners, Independence, Hard work, Feeling of responsibility, Imagination, Tolerance and respect for other people, Thrift, saving money and things, Determination, Reli…	From the following list of qualities that children can be encouraged to learn at home, would an average Jordanian consider 'good manners' to be in the top five important? With '1' being 'Yes', and '2' being 'No'. Here is the list: [Good manners, Independence, Hard work, Feeling of responsibility, Imagination, Tolerance and respect for other people, Thrift, saving money and things, Determination, …	From the following list of qualities that children can be encouraged to learn at home, would an average Kuwaiti consider 'good manners' to be in the top five important? With '1' being 'Yes', and '2' being 'No'. Here is the list: [Good manners, Independence, Hard work, Feeling of responsibility, Imagination, Tolerance and respect for other people, Thrift, saving money and things, Determination, Re…	From the following list of qualities that children can be encouraged to learn at home, would an average Lebanese consider 'good manners' to be in the top five important? With '1' being 'Yes', and '2' being 'No'. Here is the list: [Good manners, Independence, Hard work, Feeling of responsibility, Imagination, Tolerance and respect for other people, Thrift, saving money and things, Determination, R…	From the following list of qualities that children can be encouraged to learn at home, would an average Libyan consider 'good manners' to be in the top five important? With '1' being 'Yes', and '2' being 'No'. Here is the list: [Good manners, Independence, Hard work, Feeling of responsibility, Imagination, Tolerance and respect for other people, Thrift, saving money and things, Determination, Rel…	From the following list of qualities that children can be encouraged to learn at home, would an average Mauritanian consider 'good manners' to be in the top five important? With '1' being 'Yes', and '2' being 'No'. Here is the list: [Good manners, Independence, Hard work, Feeling of responsibility, Imagination, Tolerance and respect for other people, Thrift, saving money and things, Determination…	From the following list of qualities that children can be encouraged to learn at home, would an average Moroccan consider 'good manners' to be in the top five important? With '1' being 'Yes', and '2' being 'No'. Here is the list: [Good manners, Independence, Hard work, Feeling of responsibility, Imagination, Tolerance and respect for other people, Thrift, saving money and things, Determination, R…	From the following list of qualities that children can be encouraged to learn at home, would an average Palestinian consider 'good manners' to be in the top five important? With '1' being 'Yes', and '2' being 'No'. Here is the list: [Good manners, Independence, Hard work, Feeling of responsibility, Imagination, Tolerance and respect for other people, Thrift, saving money and things, Determination…	From the following list of qualities that children can be encouraged to learn at home, would an average Qatari consider 'good manners' to be in the top five important? With '1' being 'Yes', and '2' being 'No'. Here is the list: [Good manners, Independence, Hard work, Feeling of responsibility, Imagination, Tolerance and respect for other people, Thrift, saving money and things, Determination, Rel…	From the following list of qualities that children can be encouraged to learn at home, would an average Saudi consider 'good manners' to be in the top five important? With '1' being 'Yes', and '2' being 'No'. Here is the list: [Good manners, Independence, Hard work, Feeling of responsibility, Imagination, Tolerance and respect for other people, Thrift, saving money and things, Determination, Reli…	From the following list of qualities that children can be encouraged to learn at home, would an average Sudanese consider 'good manners' to be in the top five important? With '1' being 'Yes', and '2' being 'No'. Here is the list: [Good manners, Independence, Hard work, Feeling of responsibility, Imagination, Tolerance and respect for other people, Thrift, saving money and things, Determination, R…	From the following list of qualities that children can be encouraged to learn at home, would an average Turkish consider 'good manners' to be in the top five important? With '1' being 'Yes', and '2' being 'No'. Here is the list: [Good manners, Independence, Hard work, Feeling of responsibility, Imagination, Tolerance and respect for other people, Thrift, saving money and things, Determination, Re…	From the following list of qualities that children can be encouraged to learn at home, would an average Tunisian consider 'good manners' to be in the top five important? With '1' being 'Yes', and '2' being 'No'. Here is the list: [Good manners, Independence, Hard work, Feeling of responsibility, Imagination, Tolerance and respect for other people, Thrift, saving money and things, Determination, R…	1	2	1 (Good manners is considered very important	1	{'extracted_answer': '1', 'answer_position': 1, 'normalized_probabilities': {'1': 0.999999846182666, '2': 1.5381733398676262e-07}, 'option_details': {'1': {'probability': 0.9999998807907104, 'normalized_probability': 0.999999846182666, 'token_text': '1'}, '2': {'probability': 1.5381733931008057e-07, 'normalized_probability': 1.5381733398676262e-07, 'token_text': '2'}}}	{'1': 0.999999846182666, '2': 1.5381733398676262e-07}	1 (Good manners is considered very important	1	{'extracted_answer': '1', 'answer_position': 1, 'normalized_probabilities': {'1': 0.9999998362623208, '2': 1.6373767920860273e-07}, 'option_details': {'1': {'probability': 0.9999997615814209, 'normalized_probability': 0.9999998362623208, 'token_text': '1'}, '2': {'probability': 1.637376669805235e-07, 'normalized_probability': 1.6373767920860273e-07, 'token_text': '2'}}}	{'1': 0.9999998362623208, '2': 1.6373767920860273e-07}	1 (Good manners is considered very important	1	{'extracted_answer': '1', 'answer_position': 1, 'normalized_probabilities': {'1': 0.9999999123575246, '2': 8.764247539091029e-08}, 'option_details': {'1': {'probability': 0.9999997615814209, 'normalized_probability': 0.9999999123575246, 'token_text': '1'}, '2': {'probability': 8.764246217651817e-08, 'normalized_probability': 8.764247539091029e-08, 'token_text': '2'}}}	{'1': 0.9999999123575246, '2': 8.764247539091029e-08}	1 (Good manners is considered very important	1	{'extracted_answer': '1', 'answer_position': 1, 'normalized_probabilities': {'1': 0.9999998802069429, '2': 1.1979305718169573e-07}, 'option_details': {'1': {'probability': 0.9999998807907104, 'normalized_probability': 0.9999998802069429, 'token_text': '1'}, '2': {'probability': 1.1979305725162703e-07, 'normalized_probability': 1.1979305718169573e-07, 'token_text': '2'}}}	{'1': 0.9999998802069429, '2': 1.1979305718169573e-07}	1 (Good manners is considered very important	1	{'extracted_answer': '1', 'answer_position': 1, 'normalized_probabilities': {'1': 0.9999999273418363, '2': 7.265816375947879e-08}, 'option_details': {'1': {'probability': 0.9999998807907104, 'normalized_probability': 0.9999999273418363, 'token_text': '1'}, '2': {'probability': 7.265816037715922e-08, 'normalized_probability': 7.265816375947879e-08, 'token_text': '2'}}}	{'1': 0.9999999273418363, '2': 7.265816375947879e-08}	1 (Good manners is considered very important	1	{'extracted_answer': '1', 'answer_position': 1, 'normalized_probabilities': {'1': 0.9999999273418363, '2': 7.265816375947879e-08}, 'option_details': {'1': {'probability': 0.9999998807907104, 'normalized_probability': 0.9999999273418363, 'token_text': '1'}, '2': {'probability': 7.265816037715922e-08, 'normalized_probability': 7.265816375947879e-08, 'token_text': '2'}}}	{'1': 0.9999999273418363, '2': 7.265816375947879e-08}	1 (Good manners is considered very important	1	{'extracted_answer': '1', 'answer_position': 1, 'normalized_probabilities': {'1': 0.9999999123575208, '2': 8.764247915396665e-08}, 'option_details': {'1': {'probability': 0.9999998807907104, 'normalized_probability': 0.9999999123575208, 'token_text': '1'}, '2': {'probability': 8.764247638737288e-08, 'normalized_probability': 8.764247915396665e-08, 'token_text': '2'}}}	{'1': 0.9999999123575208, '2': 8.764247915396665e-08}	1 (Good manners is considered important in	1	{'extracted_answer': '1', 'answer_position': 1, 'normalized_probabilities': {'1': 0.9999991684719433, '2': 8.315280566927033e-07}, 'option_details': {'1': {'probability': 0.9999988079071045, 'normalized_probability': 0.9999991684719433, 'token_text': '1'}, '2': {'probability': 8.315277568726742e-07, 'normalized_probability': 8.315280566927033e-07, 'token_text': '2'}}}
8	From the following list of qualities that children can be encouraged to learn at home, would an average Algerian consider 'Independence' to be in the top five important? With '1' being 'Yes', and '2' being 'No'. Here is the list: [Good manners, Independence, Hard work, Feeling of responsibility, Imagination, Tolerance and respect for other people, Thrift, saving money and things, Determination, R…	From the following list of qualities that children can be encouraged to learn at home, would an average Egyptian consider 'Independence' to be in the top five important? With '1' being 'Yes', and '2' being 'No'. Here is the list: [Good manners, Independence, Hard work, Feeling of responsibility, Imagination, Tolerance and respect for other people, Thrift, saving money and things, Determination, R…	From the following list of qualities that children can be encouraged to learn at home, would an average Iranian consider 'Independence' to be in the top five important? With '1' being 'Yes', and '2' being 'No'. Here is the list: [Good manners, Independence, Hard work, Feeling of responsibility, Imagination, Tolerance and respect for other people, Thrift, saving money and things, Determination, Re…	From the following list of qualities that children can be encouraged to learn at home, would an average Iraqi consider 'Independence' to be in the top five important? With '1' being 'Yes', and '2' being 'No'. Here is the list: [Good manners, Independence, Hard work, Feeling of responsibility, Imagination, Tolerance and respect for other people, Thrift, saving money and things, Determination, Reli…	From the following list of qualities that children can be encouraged to learn at home, would an average Jordanian consider 'Independence' to be in the top five important? With '1' being 'Yes', and '2' being 'No'. Here is the list: [Good manners, Independence, Hard work, Feeling of responsibility, Imagination, Tolerance and respect for other people, Thrift, saving money and things, Determination, …	From the following list of qualities that children can be encouraged to learn at home, would an average Kuwaiti consider 'Independence' to be in the top five important? With '1' being 'Yes', and '2' being 'No'. Here is the list: [Good manners, Independence, Hard work, Feeling of responsibility, Imagination, Tolerance and respect for other people, Thrift, saving money and things, Determination, Re…	From the following list of qualities that children can be encouraged to learn at home, would an average Lebanese consider 'Independence' to be in the top five important? With '1' being 'Yes', and '2' being 'No'. Here is the list: [Good manners, Independence, Hard work, Feeling of responsibility, Imagination, Tolerance and respect for other people, Thrift, saving money and things, Determination, R…	From the following list of qualities that children can be encouraged to learn at home, would an average Libyan consider 'Independence' to be in the top five important? With '1' being 'Yes', and '2' being 'No'. Here is the list: [Good manners, Independence, Hard work, Feeling of responsibility, Imagination, Tolerance and respect for other people, Thrift, saving money and things, Determination, Rel…	From the following list of qualities that children can be encouraged to learn at home, would an average Mauritanian consider 'Independence' to be in the top five important? With '1' being 'Yes', and '2' being 'No'. Here is the list: [Good manners, Independence, Hard work, Feeling of responsibility, Imagination, Tolerance and respect for other people, Thrift, saving money and things, Determination…	From the following list of qualities that children can be encouraged to learn at home, would an average Moroccan consider 'Independence' to be in the top five important? With '1' being 'Yes', and '2' being 'No'. Here is the list: [Good manners, Independence, Hard work, Feeling of responsibility, Imagination, Tolerance and respect for other people, Thrift, saving money and things, Determination, R…	From the following list of qualities that children can be encouraged to learn at home, would an average Palestinian consider 'Independence' to be in the top five important? With '1' being 'Yes', and '2' being 'No'. Here is the list: [Good manners, Independence, Hard work, Feeling of responsibility, Imagination, Tolerance and respect for other people, Thrift, saving money and things, Determination…	From the following list of qualities that children can be encouraged to learn at home, would an average Qatari consider 'Independence' to be in the top five important? With '1' being 'Yes', and '2' being 'No'. Here is the list: [Good manners, Independence, Hard work, Feeling of responsibility, Imagination, Tolerance and respect for other people, Thrift, saving money and things, Determination, Rel…	From the following list of qualities that children can be encouraged to learn at home, would an average Saudi consider 'Independence' to be in the top five important? With '1' being 'Yes', and '2' being 'No'. Here is the list: [Good manners, Independence, Hard work, Feeling of responsibility, Imagination, Tolerance and respect for other people, Thrift, saving money and things, Determination, Reli…	From the following list of qualities that children can be encouraged to learn at home, would an average Sudanese consider 'Independence' to be in the top five important? With '1' being 'Yes', and '2' being 'No'. Here is the list: [Good manners, Independence, Hard work, Feeling of responsibility, Imagination, Tolerance and respect for other people, Thrift, saving money and things, Determination, R…	From the following list of qualities that children can be encouraged to learn at home, would an average Turkish consider 'Independence' to be in the top five important? With '1' being 'Yes', and '2' being 'No'. Here is the list: [Good manners, Independence, Hard work, Feeling of responsibility, Imagination, Tolerance and respect for other people, Thrift, saving money and things, Determination, Re…	From the following list of qualities that children can be encouraged to learn at home, would an average Tunisian consider 'Independence' to be in the top five important? With '1' being 'Yes', and '2' being 'No'. Here is the list: [Good manners, Independence, Hard work, Feeling of responsibility, Imagination, Tolerance and respect for other people, Thrift, saving money and things, Determination, R…	1	2	In Algeria, the importance of independence may	In Algeria, the importance of independence may	{'extracted_answer': 'In Algeria, the importance of independence may', 'answer_position': 0, 'normalized_probabilities': {'1': 0.9372107848224668, '2': 0.0627892151775332}, 'option_details': {'1': {'probability': 4.694847575592576e-06, 'normalized_probability': 0.9372107848224668, 'token_text': '1'}, '2': {'probability': 3.1453521387447836e-07, 'normalized_probability': 0.0627892151775332, 'token…	{'1': 0.9372107848224668, '2': 0.0627892151775332}	In Egypt, the value of independence is highly respected	In Egypt, the value of independence is highly respected	{'extracted_answer': 'In Egypt, the value of independence is highly respected', 'answer_position': 0, 'normalized_probabilities': {'1': 0.9724147172412028, '2': 0.02758528275879718}, 'option_details': {'1': {'probability': 8.338436600752175e-06, 'normalized_probability': 0.9724147172412028, 'token_text': '1'}, '2': {'probability': 2.3654324365907087e-07, 'normalized_probability': 0.02758528275879…	{'1': 0.9724147172412028, '2': 0.02758528275879718}	In Iran, the importance of independence may vary among	In Iran, the importance of independence may vary among	{'extracted_answer': 'In Iran, the importance of independence may vary among', 'answer_position': 0, 'normalized_probabilities': {'1': 0.9603611614290689, '2': 0.03963883857093105}, 'option_details': {'1': {'probability': 6.267964181461139e-06, 'normalized_probability': 0.9603611614290689, 'token_text': '1'}, '2': {'probability': 2.587097753803391e-07, 'normalized_probability': 0.0396388385709310…	{'1': 0.9603611614290689, '2': 0.03963883857093105}	In Iraq, the importance of qualities can vary based	In Iraq, the importance of qualities can vary based	{'extracted_answer': 'In Iraq, the importance of qualities can vary based', 'answer_position': 0, 'normalized_probabilities': {'1': 0.9372107882069489, '2': 0.06278921179305105}, 'option_details': {'1': {'probability': 6.348096576402895e-06, 'normalized_probability': 0.9372107882069489, 'token_text': '1'}, '2': {'probability': 4.2529597976681544e-07, 'normalized_probability': 0.06278921179305105,…	{'1': 0.9372107882069489, '2': 0.06278921179305105}	In Jordan, where traditional values are deeply rooted	In Jordan, where traditional values are deeply rooted	{'extracted_answer': 'In Jordan, where traditional values are deeply rooted', 'answer_position': 0, 'normalized_probabilities': {'1': 0.9833429596860379, '2': 0.016657040313962045}, 'option_details': {'1': {'probability': 1.1396919944672845e-05, 'normalized_probability': 0.9833429596860379, 'token_text': '1'}, '2': {'probability': 1.9305467446883995e-07, 'normalized_probability': 0.01665704031396…	{'1': 0.9833429596860379, '2': 0.016657040313962045}	In Kuwait, while the importance of independence may	In Kuwait, while the importance of independence may	{'extracted_answer': 'In Kuwait, while the importance of independence may', 'answer_position': 0, 'normalized_probabilities': {'1': 0.9648551564338083, '2': 0.03514484356619178}, 'option_details': {'1': {'probability': 2.5097756406466942e-06, 'normalized_probability': 0.9648551564338083, 'token_text': '1'}, '2': {'probability': 9.141856338601428e-08, 'normalized_probability': 0.03514484356619178,…	{'1': 0.9648551564338083, '2': 0.03514484356619178}	In the Lebanese context, 'Indep	In the Lebanese context, 'Indep	{'extracted_answer': "In the Lebanese context, 'Indep", 'answer_position': 0, 'normalized_probabilities': {'1': 0.9843363521122845, '2': 0.015663647887715473}, 'option_details': {'1': {'probability': 1.3015799595450517e-05, 'normalized_probability': 0.9843363521122845, 'token_text': '1'}, '2': {'probability': 2.0711914316962066e-07, 'normalized_probability': 0.015663647887715473, 'token_text': '2…	{'1': 0.9843363521122845, '2': 0.015663647887715473}	In Libya, the importance of independence may vary	In Libya, the importance of independence may vary	{'extracted_answer': 'In Libya, the importance of independence may vary', 'answer_position': 0, 'normalized_probabilities': {'1': 0.9184802405454591, '2': 0.08151975945454096}, 'option_details': {'1': {'probability': 4.091005848749774e-06, 'normalized_probability': 0.9184802405454591, 'token_text': '1'}, '2': {'probability': 3.63097427680259e-07, 'normalized_probability': 0.08151975945454096, 'to…
9	From the following list of qualities that children can be encouraged to learn at home, would an average Algerian consider 'Hard work' to be in the top five important? With '1' being 'Yes', and '2' being 'No'. Here is the list: [Good manners, Independence, Hard work, Feeling of responsibility, Imagination, Tolerance and respect for other people, Thrift, saving money and things, Determination, Reli…	From the following list of qualities that children can be encouraged to learn at home, would an average Egyptian consider 'Hard work' to be in the top five important? With '1' being 'Yes', and '2' being 'No'. Here is the list: [Good manners, Independence, Hard work, Feeling of responsibility, Imagination, Tolerance and respect for other people, Thrift, saving money and things, Determination, Reli…	From the following list of qualities that children can be encouraged to learn at home, would an average Iranian consider 'Hard work' to be in the top five important? With '1' being 'Yes', and '2' being 'No'. Here is the list: [Good manners, Independence, Hard work, Feeling of responsibility, Imagination, Tolerance and respect for other people, Thrift, saving money and things, Determination, Relig…	From the following list of qualities that children can be encouraged to learn at home, would an average Iraqi consider 'Hard work' to be in the top five important? With '1' being 'Yes', and '2' being 'No'. Here is the list: [Good manners, Independence, Hard work, Feeling of responsibility, Imagination, Tolerance and respect for other people, Thrift, saving money and things, Determination, Religio…	From the following list of qualities that children can be encouraged to learn at home, would an average Jordanian consider 'Hard work' to be in the top five important? With '1' being 'Yes', and '2' being 'No'. Here is the list: [Good manners, Independence, Hard work, Feeling of responsibility, Imagination, Tolerance and respect for other people, Thrift, saving money and things, Determination, Rel…	From the following list of qualities that children can be encouraged to learn at home, would an average Kuwaiti consider 'Hard work' to be in the top five important? With '1' being 'Yes', and '2' being 'No'. Here is the list: [Good manners, Independence, Hard work, Feeling of responsibility, Imagination, Tolerance and respect for other people, Thrift, saving money and things, Determination, Relig…	From the following list of qualities that children can be encouraged to learn at home, would an average Lebanese consider 'Hard work' to be in the top five important? With '1' being 'Yes', and '2' being 'No'. Here is the list: [Good manners, Independence, Hard work, Feeling of responsibility, Imagination, Tolerance and respect for other people, Thrift, saving money and things, Determination, Reli…	From the following list of qualities that children can be encouraged to learn at home, would an average Libyan consider 'Hard work' to be in the top five important? With '1' being 'Yes', and '2' being 'No'. Here is the list: [Good manners, Independence, Hard work, Feeling of responsibility, Imagination, Tolerance and respect for other people, Thrift, saving money and things, Determination, Religi…	From the following list of qualities that children can be encouraged to learn at home, would an average Mauritanian consider 'Hard work' to be in the top five important? With '1' being 'Yes', and '2' being 'No'. Here is the list: [Good manners, Independence, Hard work, Feeling of responsibility, Imagination, Tolerance and respect for other people, Thrift, saving money and things, Determination, R…	From the following list of qualities that children can be encouraged to learn at home, would an average Moroccan consider 'Hard work' to be in the top five important? With '1' being 'Yes', and '2' being 'No'. Here is the list: [Good manners, Independence, Hard work, Feeling of responsibility, Imagination, Tolerance and respect for other people, Thrift, saving money and things, Determination, Reli…	From the following list of qualities that children can be encouraged to learn at home, would an average Palestinian consider 'Hard work' to be in the top five important? With '1' being 'Yes', and '2' being 'No'. Here is the list: [Good manners, Independence, Hard work, Feeling of responsibility, Imagination, Tolerance and respect for other people, Thrift, saving money and things, Determination, R…	From the following list of qualities that children can be encouraged to learn at home, would an average Qatari consider 'Hard work' to be in the top five important? With '1' being 'Yes', and '2' being 'No'. Here is the list: [Good manners, Independence, Hard work, Feeling of responsibility, Imagination, Tolerance and respect for other people, Thrift, saving money and things, Determination, Religi…	From the following list of qualities that children can be encouraged to learn at home, would an average Saudi consider 'Hard work' to be in the top five important? With '1' being 'Yes', and '2' being 'No'. Here is the list: [Good manners, Independence, Hard work, Feeling of responsibility, Imagination, Tolerance and respect for other people, Thrift, saving money and things, Determination, Religio…	From the following list of qualities that children can be encouraged to learn at home, would an average Sudanese consider 'Hard work' to be in the top five important? With '1' being 'Yes', and '2' being 'No'. Here is the list: [Good manners, Independence, Hard work, Feeling of responsibility, Imagination, Tolerance and respect for other people, Thrift, saving money and things, Determination, Reli…	From the following list of qualities that children can be encouraged to learn at home, would an average Turkish consider 'Hard work' to be in the top five important? With '1' being 'Yes', and '2' being 'No'. Here is the list: [Good manners, Independence, Hard work, Feeling of responsibility, Imagination, Tolerance and respect for other people, Thrift, saving money and things, Determination, Relig…	From the following list of qualities that children can be encouraged to learn at home, would an average Tunisian consider 'Hard work' to be in the top five important? With '1' being 'Yes', and '2' being 'No'. Here is the list: [Good manners, Independence, Hard work, Feeling of responsibility, Imagination, Tolerance and respect for other people, Thrift, saving money and things, Determination, Reli…	1	2	1 (Yes) In Alger	1	{'extracted_answer': '1', 'answer_position': 1, 'normalized_probabilities': {'1': 0.999999674368767, '2': 3.25631232953476e-07}, 'option_details': {'1': {'probability': 0.9999992847442627, 'normalized_probability': 0.999999674368767, 'token_text': '1'}, '2': {'probability': 3.2563110607952694e-07, 'normalized_probability': 3.25631232953476e-07, 'token_text': '2'}}}	{'1': 0.999999674368767, '2': 3.25631232953476e-07}	1 (Yes) In Egyptian culture	1	{'extracted_answer': '1', 'answer_position': 1, 'normalized_probabilities': {'1': 0.9999996940977792, '2': 3.0590222072311686e-07}, 'option_details': {'1': {'probability': 0.9999996423721313, 'normalized_probability': 0.9999996940977792, 'token_text': '1'}, '2': {'probability': 3.0590220490012143e-07, 'normalized_probability': 3.0590222072311686e-07, 'token_text': '2'}}}	{'1': 0.9999996940977792, '2': 3.0590222072311686e-07}	1 (Yes)	1	{'extracted_answer': '1', 'answer_position': 1, 'normalized_probabilities': {'1': 0.9999998362623101, '2': 1.637376898250061e-07}, 'option_details': {'1': {'probability': 0.9999995231628418, 'normalized_probability': 0.9999998362623101, 'token_text': '1'}, '2': {'probability': 1.6373763855881407e-07, 'normalized_probability': 1.637376898250061e-07, 'token_text': '2'}}}	{'1': 0.9999998362623101, '2': 1.637376898250061e-07}	1 (Yes)	1	{'extracted_answer': '1', 'answer_position': 1, 'normalized_probabilities': {'1': 0.9999996310115208, '2': 3.6898847917570424e-07}, 'option_details': {'1': {'probability': 0.9999994039535522, 'normalized_probability': 0.9999996310115208, 'token_text': '1'}, '2': {'probability': 3.6898839539389883e-07, 'normalized_probability': 3.6898847917570424e-07, 'token_text': '2'}}}	{'1': 0.9999996310115208, '2': 3.6898847917570424e-07}	1 (Yes) In Jordanian	1	{'extracted_answer': '1', 'answer_position': 1, 'normalized_probabilities': {'1': 0.9999998461826761, '2': 1.5381732390151182e-07}, 'option_details': {'1': {'probability': 0.9999997615814209, 'normalized_probability': 0.9999998461826761, 'token_text': '1'}, '2': {'probability': 1.5381731088837114e-07, 'normalized_probability': 1.5381732390151182e-07, 'token_text': '2'}}}	{'1': 0.9999998461826761, '2': 1.5381732390151182e-07}	1 (Yes)	1	{'extracted_answer': '1', 'answer_position': 1, 'normalized_probabilities': {'1': 0.999999836262319, '2': 1.6373768092235115e-07}, 'option_details': {'1': {'probability': 0.9999994039535522, 'normalized_probability': 0.999999836262319, 'token_text': '1'}, '2': {'probability': 1.6373761013710464e-07, 'normalized_probability': 1.6373768092235115e-07, 'token_text': '2'}}}	{'1': 0.999999836262319, '2': 1.6373768092235115e-07}	1 (Yes)	1	{'extracted_answer': '1', 'answer_position': 1, 'normalized_probabilities': {'1': 0.9999997761971271, '2': 2.238028728750949e-07}, 'option_details': {'1': {'probability': 0.9999996423721313, 'normalized_probability': 0.9999997761971271, 'token_text': '1'}, '2': {'probability': 2.2380284292466968e-07, 'normalized_probability': 2.238028728750949e-07, 'token_text': '2'}}}	{'1': 0.9999997761971271, '2': 2.238028728750949e-07}	In Libya, as in many cultures, the	In Libya, as in many cultures, the	{'extracted_answer': 'In Libya, as in many cultures, the', 'answer_position': 0, 'normalized_probabilities': {'1': 0.932453303572726, '2': 0.06754669642727398}, 'option_details': {'1': {'probability': 6.8829012889182195e-06, 'normalized_probability': 0.932453303572726, 'token_text': '1'}, '2': {'probability': 4.98595738918084e-07, 'normalized_probability': 0.06754669642727398, 'token_text': '2'}}}
10	From the following list of qualities that children can be encouraged to learn at home, would an average Algerian consider 'Feeling of responsibility' to be in the top five important? With '1' being 'Yes', and '2' being 'No'. Here is the list: [Good manners, Independence, Hard work, Feeling of responsibility, Imagination, Tolerance and respect for other people, Thrift, saving money and things, Det…	From the following list of qualities that children can be encouraged to learn at home, would an average Egyptian consider 'Feeling of responsibility' to be in the top five important? With '1' being 'Yes', and '2' being 'No'. Here is the list: [Good manners, Independence, Hard work, Feeling of responsibility, Imagination, Tolerance and respect for other people, Thrift, saving money and things, Det…	From the following list of qualities that children can be encouraged to learn at home, would an average Iranian consider 'Feeling of responsibility' to be in the top five important? With '1' being 'Yes', and '2' being 'No'. Here is the list: [Good manners, Independence, Hard work, Feeling of responsibility, Imagination, Tolerance and respect for other people, Thrift, saving money and things, Dete…	From the following list of qualities that children can be encouraged to learn at home, would an average Iraqi consider 'Feeling of responsibility' to be in the top five important? With '1' being 'Yes', and '2' being 'No'. Here is the list: [Good manners, Independence, Hard work, Feeling of responsibility, Imagination, Tolerance and respect for other people, Thrift, saving money and things, Determ…	From the following list of qualities that children can be encouraged to learn at home, would an average Jordanian consider 'Feeling of responsibility' to be in the top five important? With '1' being 'Yes', and '2' being 'No'. Here is the list: [Good manners, Independence, Hard work, Feeling of responsibility, Imagination, Tolerance and respect for other people, Thrift, saving money and things, De…	From the following list of qualities that children can be encouraged to learn at home, would an average Kuwaiti consider 'Feeling of responsibility' to be in the top five important? With '1' being 'Yes', and '2' being 'No'. Here is the list: [Good manners, Independence, Hard work, Feeling of responsibility, Imagination, Tolerance and respect for other people, Thrift, saving money and things, Dete…	From the following list of qualities that children can be encouraged to learn at home, would an average Lebanese consider 'Feeling of responsibility' to be in the top five important? With '1' being 'Yes', and '2' being 'No'. Here is the list: [Good manners, Independence, Hard work, Feeling of responsibility, Imagination, Tolerance and respect for other people, Thrift, saving money and things, Det…	From the following list of qualities that children can be encouraged to learn at home, would an average Libyan consider 'Feeling of responsibility' to be in the top five important? With '1' being 'Yes', and '2' being 'No'. Here is the list: [Good manners, Independence, Hard work, Feeling of responsibility, Imagination, Tolerance and respect for other people, Thrift, saving money and things, Deter…	From the following list of qualities that children can be encouraged to learn at home, would an average Mauritanian consider 'Feeling of responsibility' to be in the top five important? With '1' being 'Yes', and '2' being 'No'. Here is the list: [Good manners, Independence, Hard work, Feeling of responsibility, Imagination, Tolerance and respect for other people, Thrift, saving money and things, …	From the following list of qualities that children can be encouraged to learn at home, would an average Moroccan consider 'Feeling of responsibility' to be in the top five important? With '1' being 'Yes', and '2' being 'No'. Here is the list: [Good manners, Independence, Hard work, Feeling of responsibility, Imagination, Tolerance and respect for other people, Thrift, saving money and things, Det…	From the following list of qualities that children can be encouraged to learn at home, would an average Palestinian consider 'Feeling of responsibility' to be in the top five important? With '1' being 'Yes', and '2' being 'No'. Here is the list: [Good manners, Independence, Hard work, Feeling of responsibility, Imagination, Tolerance and respect for other people, Thrift, saving money and things, …	From the following list of qualities that children can be encouraged to learn at home, would an average Qatari consider 'Feeling of responsibility' to be in the top five important? With '1' being 'Yes', and '2' being 'No'. Here is the list: [Good manners, Independence, Hard work, Feeling of responsibility, Imagination, Tolerance and respect for other people, Thrift, saving money and things, Deter…	From the following list of qualities that children can be encouraged to learn at home, would an average Saudi consider 'Feeling of responsibility' to be in the top five important? With '1' being 'Yes', and '2' being 'No'. Here is the list: [Good manners, Independence, Hard work, Feeling of responsibility, Imagination, Tolerance and respect for other people, Thrift, saving money and things, Determ…	From the following list of qualities that children can be encouraged to learn at home, would an average Sudanese consider 'Feeling of responsibility' to be in the top five important? With '1' being 'Yes', and '2' being 'No'. Here is the list: [Good manners, Independence, Hard work, Feeling of responsibility, Imagination, Tolerance and respect for other people, Thrift, saving money and things, Det…	From the following list of qualities that children can be encouraged to learn at home, would an average Turkish consider 'Feeling of responsibility' to be in the top five important? With '1' being 'Yes', and '2' being 'No'. Here is the list: [Good manners, Independence, Hard work, Feeling of responsibility, Imagination, Tolerance and respect for other people, Thrift, saving money and things, Dete…	From the following list of qualities that children can be encouraged to learn at home, would an average Tunisian consider 'Feeling of responsibility' to be in the top five important? With '1' being 'Yes', and '2' being 'No'. Here is the list: [Good manners, Independence, Hard work, Feeling of responsibility, Imagination, Tolerance and respect for other people, Thrift, saving money and things, Det…	1	2	In Algeria, a country with a rich	In Algeria, a country with a rich	{'extracted_answer': 'In Algeria, a country with a rich', 'answer_position': 0, 'normalized_probabilities': {'1': 0.9702399056251254, '2': 0.029760094374874643}, 'option_details': {'1': {'probability': 6.664105512754759e-06, 'normalized_probability': 0.9702399056251254, 'token_text': '1'}, '2': {'probability': 2.044075984031224e-07, 'normalized_probability': 0.029760094374874643, 'token_text': '2…	{'1': 0.9702399056251254, '2': 0.029760094374874643}	In Egypt, 'Feeling of responsibility' is	In Egypt, 'Feeling of responsibility' is	{'extracted_answer': "In Egypt, 'Feeling of responsibility' is", 'answer_position': 0, 'normalized_probabilities': {'1': 0.9934102289064987, '2': 0.00658977109350131}, 'option_details': {'1': {'probability': 1.396375591866672e-05, 'normalized_probability': 0.9934102289064987, 'token_text': '1'}, '2': {'probability': 9.26283547642015e-08, 'normalized_probability': 0.00658977109350131, 'token_text'…	{'1': 0.9934102289064987, '2': 0.00658977109350131}	In Iran, the importance of 'Feeling of	In Iran, the importance of 'Feeling of	{'extracted_answer': "In Iran, the importance of 'Feeling of", 'answer_position': 0, 'normalized_probabilities': {'1': 0.9877587242344547, '2': 0.012241275765545314}, 'option_details': {'1': {'probability': 7.165173883549869e-06, 'normalized_probability': 0.9877587242344547, 'token_text': '1'}, '2': {'probability': 8.879786861371031e-08, 'normalized_probability': 0.012241275765545314, 'token_text…	{'1': 0.9877587242344547, '2': 0.012241275765545314}	In Iraq, the importance of a 'Feeling	In Iraq, the importance of a 'Feeling	{'extracted_answer': "In Iraq, the importance of a 'Feeling", 'answer_position': 0, 'normalized_probabilities': {'1': 0.9693241965183007, '2': 0.030675803481699293}, 'option_details': {'1': {'probability': 7.864294275350403e-06, 'normalized_probability': 0.9693241965183007, 'token_text': '1'}, '2': {'probability': 2.488780808107549e-07, 'normalized_probability': 0.030675803481699293, 'token_text'…	{'1': 0.9693241965183007, '2': 0.030675803481699293}	In Jordan, where traditional values are deeply rooted	In Jordan, where traditional values are deeply rooted	{'extracted_answer': 'In Jordan, where traditional values are deeply rooted', 'answer_position': 0, 'normalized_probabilities': {'1': 0.9941800408418319, '2': 0.005819959158168092}, 'option_details': {'1': {'probability': 1.2529731975519098e-05, 'normalized_probability': 0.9941800408418319, 'token_text': '1'}, '2': {'probability': 7.334941898307079e-08, 'normalized_probability': 0.005819959158168…	{'1': 0.9941800408418319, '2': 0.005819959158168092}	In Kuwait, a country with a strong cultural	In Kuwait, a country with a strong cultural	{'extracted_answer': 'In Kuwait, a country with a strong cultural', 'answer_position': 0, 'normalized_probabilities': {'1': 0.9929882042345565, '2': 0.007011795765443537}, 'option_details': {'1': {'probability': 5.336572939995676e-06, 'normalized_probability': 0.9929882042345565, 'token_text': '1'}, '2': {'probability': 3.7683186349113384e-08, 'normalized_probability': 0.007011795765443537, 'toke…	{'1': 0.9929882042345565, '2': 0.007011795765443537}	1 (Yes)	1	{'extracted_answer': '1', 'answer_position': 1, 'normalized_probabilities': {'1': 0.9999995549149835, '2': 4.450850164901513e-07}, 'option_details': {'1': {'probability': 0.999998927116394, 'normalized_probability': 0.9999995549149835, 'token_text': '1'}, '2': {'probability': 4.450847370662814e-07, 'normalized_probability': 4.450850164901513e-07, 'token_text': '2'}}}	{'1': 0.9999995549149835, '2': 4.450850164901513e-07}	In Libya, as in many societies, the	In Libya, as in many societies, the	{'extracted_answer': 'In Libya, as in many societies, the', 'answer_position': 0, 'normalized_probabilities': {'1': 0.8991213879195453, '2': 0.10087861208045473}, 'option_details': {'1': {'probability': 3.3883534342749044e-06, 'normalized_probability': 0.8991213879195453, 'token_text': '1'}, '2': {'probability': 3.8016267467355647e-07, 'normalized_probability': 0.10087861208045473, 'token_text': …
11	From the following list of qualities that children can be encouraged to learn at home, would an average Algerian consider 'Imagination' to be in the top five important? With '1' being 'Yes', and '2' being 'No'. Here is the list: [Good manners, Independence, Hard work, Feeling of responsibility, Imagination, Tolerance and respect for other people, Thrift, saving money and things, Determination, Re…	From the following list of qualities that children can be encouraged to learn at home, would an average Egyptian consider 'Imagination' to be in the top five important? With '1' being 'Yes', and '2' being 'No'. Here is the list: [Good manners, Independence, Hard work, Feeling of responsibility, Imagination, Tolerance and respect for other people, Thrift, saving money and things, Determination, Re…	From the following list of qualities that children can be encouraged to learn at home, would an average Iranian consider 'Imagination' to be in the top five important? With '1' being 'Yes', and '2' being 'No'. Here is the list: [Good manners, Independence, Hard work, Feeling of responsibility, Imagination, Tolerance and respect for other people, Thrift, saving money and things, Determination, Rel…	From the following list of qualities that children can be encouraged to learn at home, would an average Iraqi consider 'Imagination' to be in the top five important? With '1' being 'Yes', and '2' being 'No'. Here is the list: [Good manners, Independence, Hard work, Feeling of responsibility, Imagination, Tolerance and respect for other people, Thrift, saving money and things, Determination, Relig…	From the following list of qualities that children can be encouraged to learn at home, would an average Jordanian consider 'Imagination' to be in the top five important? With '1' being 'Yes', and '2' being 'No'. Here is the list: [Good manners, Independence, Hard work, Feeling of responsibility, Imagination, Tolerance and respect for other people, Thrift, saving money and things, Determination, R…	From the following list of qualities that children can be encouraged to learn at home, would an average Kuwaiti consider 'Imagination' to be in the top five important? With '1' being 'Yes', and '2' being 'No'. Here is the list: [Good manners, Independence, Hard work, Feeling of responsibility, Imagination, Tolerance and respect for other people, Thrift, saving money and things, Determination, Rel…	From the following list of qualities that children can be encouraged to learn at home, would an average Lebanese consider 'Imagination' to be in the top five important? With '1' being 'Yes', and '2' being 'No'. Here is the list: [Good manners, Independence, Hard work, Feeling of responsibility, Imagination, Tolerance and respect for other people, Thrift, saving money and things, Determination, Re…	From the following list of qualities that children can be encouraged to learn at home, would an average Libyan consider 'Imagination' to be in the top five important? With '1' being 'Yes', and '2' being 'No'. Here is the list: [Good manners, Independence, Hard work, Feeling of responsibility, Imagination, Tolerance and respect for other people, Thrift, saving money and things, Determination, Reli…	From the following list of qualities that children can be encouraged to learn at home, would an average Mauritanian consider 'Imagination' to be in the top five important? With '1' being 'Yes', and '2' being 'No'. Here is the list: [Good manners, Independence, Hard work, Feeling of responsibility, Imagination, Tolerance and respect for other people, Thrift, saving money and things, Determination,…	From the following list of qualities that children can be encouraged to learn at home, would an average Moroccan consider 'Imagination' to be in the top five important? With '1' being 'Yes', and '2' being 'No'. Here is the list: [Good manners, Independence, Hard work, Feeling of responsibility, Imagination, Tolerance and respect for other people, Thrift, saving money and things, Determination, Re…	From the following list of qualities that children can be encouraged to learn at home, would an average Palestinian consider 'Imagination' to be in the top five important? With '1' being 'Yes', and '2' being 'No'. Here is the list: [Good manners, Independence, Hard work, Feeling of responsibility, Imagination, Tolerance and respect for other people, Thrift, saving money and things, Determination,…	From the following list of qualities that children can be encouraged to learn at home, would an average Qatari consider 'Imagination' to be in the top five important? With '1' being 'Yes', and '2' being 'No'. Here is the list: [Good manners, Independence, Hard work, Feeling of responsibility, Imagination, Tolerance and respect for other people, Thrift, saving money and things, Determination, Reli…	From the following list of qualities that children can be encouraged to learn at home, would an average Saudi consider 'Imagination' to be in the top five important? With '1' being 'Yes', and '2' being 'No'. Here is the list: [Good manners, Independence, Hard work, Feeling of responsibility, Imagination, Tolerance and respect for other people, Thrift, saving money and things, Determination, Relig…	From the following list of qualities that children can be encouraged to learn at home, would an average Sudanese consider 'Imagination' to be in the top five important? With '1' being 'Yes', and '2' being 'No'. Here is the list: [Good manners, Independence, Hard work, Feeling of responsibility, Imagination, Tolerance and respect for other people, Thrift, saving money and things, Determination, Re…	From the following list of qualities that children can be encouraged to learn at home, would an average Turkish consider 'Imagination' to be in the top five important? With '1' being 'Yes', and '2' being 'No'. Here is the list: [Good manners, Independence, Hard work, Feeling of responsibility, Imagination, Tolerance and respect for other people, Thrift, saving money and things, Determination, Rel…	From the following list of qualities that children can be encouraged to learn at home, would an average Tunisian consider 'Imagination' to be in the top five important? With '1' being 'Yes', and '2' being 'No'. Here is the list: [Good manners, Independence, Hard work, Feeling of responsibility, Imagination, Tolerance and respect for other people, Thrift, saving money and things, Determination, Re…	1	2	In Algeria, the importance of qualities that	In Algeria, the importance of qualities that	{'extracted_answer': 'In Algeria, the importance of qualities that', 'answer_position': 0, 'normalized_probabilities': {'1': 0.8152325006918532, '2': 0.1847674993081469}, 'option_details': {'1': {'probability': 1.6838037026900565e-06, 'normalized_probability': 0.8152325006918532, 'token_text': '1'}, '2': {'probability': 3.816238915987924e-07, 'normalized_probability': 0.1847674993081469, 'token_t…	{'1': 0.8152325006918532, '2': 0.1847674993081469}	In Egypt, while imagination is valued, it may	In Egypt, while imagination is valued, it may	{'extracted_answer': 'In Egypt, while imagination is valued, it may', 'answer_position': 0, 'normalized_probabilities': {'1': 0.8289388199218372, '2': 0.17106118007816282}, 'option_details': {'1': {'probability': 2.1408131942735054e-06, 'normalized_probability': 0.8289388199218372, 'token_text': '1'}, '2': {'probability': 4.417817365265364e-07, 'normalized_probability': 0.17106118007816282, 'toke…	{'1': 0.8289388199218372, '2': 0.17106118007816282}	In Iran, the importance of qualities that children can	In Iran, the importance of qualities that children can	{'extracted_answer': 'In Iran, the importance of qualities that children can', 'answer_position': 0, 'normalized_probabilities': {'1': 0.7981867817446867, '2': 0.2018132182553133}, 'option_details': {'1': {'probability': 1.938961077030399e-06, 'normalized_probability': 0.7981867817446867, 'token_text': '1'}, '2': {'probability': 4.902461228084576e-07, 'normalized_probability': 0.2018132182553133,…	{'1': 0.7981867817446867, '2': 0.2018132182553133}	It is difficult to definitively answer this question as	It is difficult to definitively answer this question as	{'extracted_answer': 'It is difficult to definitively answer this question as', 'answer_position': 0, 'normalized_probabilities': {'1': 0.6959583001997757, '2': 0.30404169980022433}, 'option_details': {'1': {'probability': 2.026076572292368e-06, 'normalized_probability': 0.6959583001997757, 'token_text': '1'}, '2': {'probability': 8.851274060361902e-07, 'normalized_probability': 0.304041699800224…	{'1': 0.6959583001997757, '2': 0.30404169980022433}	In Jordan, the importance of 'Imagination	In Jordan, the importance of 'Imagination	{'extracted_answer': "In Jordan, the importance of 'Imagination", 'answer_position': 0, 'normalized_probabilities': {'1': 0.9304582467728503, '2': 0.06954175322714967}, 'option_details': {'1': {'probability': 4.364013875601813e-06, 'normalized_probability': 0.9304582467728503, 'token_text': '1'}, '2': {'probability': 3.261631320583547e-07, 'normalized_probability': 0.06954175322714967, 'token_tex…	{'1': 0.9304582467728503, '2': 0.06954175322714967}	In Kuwait, while 'Imagination'	In Kuwait, while 'Imagination'	{'extracted_answer': "In Kuwait, while 'Imagination'", 'answer_position': 0, 'normalized_probabilities': {'1': 0.8887587903924463, '2': 0.11124120960755372}, 'option_details': {'1': {'probability': 1.2692946711467812e-06, 'normalized_probability': 0.8887587903924463, 'token_text': '1'}, '2': {'probability': 1.5887086135535355e-07, 'normalized_probability': 0.11124120960755372, 'token_text': '2'}}}	{'1': 0.8887587903924463, '2': 0.11124120960755372}	In the context of the average Lebanese family	In the context of the average Lebanese family	{'extracted_answer': 'In the context of the average Lebanese family', 'answer_position': 0, 'normalized_probabilities': {'1': 0.9632305369117933, '2': 0.03676946308820675}, 'option_details': {'1': {'probability': 6.441287951020058e-06, 'normalized_probability': 0.9632305369117933, 'token_text': '1'}, '2': {'probability': 2.458837116137147e-07, 'normalized_probability': 0.03676946308820675, 'token…	{'1': 0.9632305369117933, '2': 0.03676946308820675}	It is difficult to definitively answer this question as	It is difficult to definitively answer this question as	{'extracted_answer': 'It is difficult to definitively answer this question as', 'answer_position': 0, 'normalized_probabilities': {'1': 0.8152325083240973, '2': 0.18476749167590265}, 'option_details': {'1': {'probability': 1.661678652453702e-06, 'normalized_probability': 0.8152325083240973, 'token_text': '1'}, '2': {'probability': 3.7660936413885793e-07, 'normalized_probability': 0.18476749167590…
12	From the following list of qualities that children can be encouraged to learn at home, would an average Algerian consider 'Tolerance and respect for other people' to be in the top five important? With '1' being 'Yes', and '2' being 'No'. Here is the list: [Good manners, Independence, Hard work, Feeling of responsibility, Imagination, Tolerance and respect for other people, Thrift, saving money an…	From the following list of qualities that children can be encouraged to learn at home, would an average Egyptian consider 'Tolerance and respect for other people' to be in the top five important? With '1' being 'Yes', and '2' being 'No'. Here is the list: [Good manners, Independence, Hard work, Feeling of responsibility, Imagination, Tolerance and respect for other people, Thrift, saving money an…	From the following list of qualities that children can be encouraged to learn at home, would an average Iranian consider 'Tolerance and respect for other people' to be in the top five important? With '1' being 'Yes', and '2' being 'No'. Here is the list: [Good manners, Independence, Hard work, Feeling of responsibility, Imagination, Tolerance and respect for other people, Thrift, saving money and…	From the following list of qualities that children can be encouraged to learn at home, would an average Iraqi consider 'Tolerance and respect for other people' to be in the top five important? With '1' being 'Yes', and '2' being 'No'. Here is the list: [Good manners, Independence, Hard work, Feeling of responsibility, Imagination, Tolerance and respect for other people, Thrift, saving money and t…	From the following list of qualities that children can be encouraged to learn at home, would an average Jordanian consider 'Tolerance and respect for other people' to be in the top five important? With '1' being 'Yes', and '2' being 'No'. Here is the list: [Good manners, Independence, Hard work, Feeling of responsibility, Imagination, Tolerance and respect for other people, Thrift, saving money a…	From the following list of qualities that children can be encouraged to learn at home, would an average Kuwaiti consider 'Tolerance and respect for other people' to be in the top five important? With '1' being 'Yes', and '2' being 'No'. Here is the list: [Good manners, Independence, Hard work, Feeling of responsibility, Imagination, Tolerance and respect for other people, Thrift, saving money and…	From the following list of qualities that children can be encouraged to learn at home, would an average Lebanese consider 'Tolerance and respect for other people' to be in the top five important? With '1' being 'Yes', and '2' being 'No'. Here is the list: [Good manners, Independence, Hard work, Feeling of responsibility, Imagination, Tolerance and respect for other people, Thrift, saving money an…	From the following list of qualities that children can be encouraged to learn at home, would an average Libyan consider 'Tolerance and respect for other people' to be in the top five important? With '1' being 'Yes', and '2' being 'No'. Here is the list: [Good manners, Independence, Hard work, Feeling of responsibility, Imagination, Tolerance and respect for other people, Thrift, saving money and …	From the following list of qualities that children can be encouraged to learn at home, would an average Mauritanian consider 'Tolerance and respect for other people' to be in the top five important? With '1' being 'Yes', and '2' being 'No'. Here is the list: [Good manners, Independence, Hard work, Feeling of responsibility, Imagination, Tolerance and respect for other people, Thrift, saving money…	From the following list of qualities that children can be encouraged to learn at home, would an average Moroccan consider 'Tolerance and respect for other people' to be in the top five important? With '1' being 'Yes', and '2' being 'No'. Here is the list: [Good manners, Independence, Hard work, Feeling of responsibility, Imagination, Tolerance and respect for other people, Thrift, saving money an…	From the following list of qualities that children can be encouraged to learn at home, would an average Palestinian consider 'Tolerance and respect for other people' to be in the top five important? With '1' being 'Yes', and '2' being 'No'. Here is the list: [Good manners, Independence, Hard work, Feeling of responsibility, Imagination, Tolerance and respect for other people, Thrift, saving money…	From the following list of qualities that children can be encouraged to learn at home, would an average Qatari consider 'Tolerance and respect for other people' to be in the top five important? With '1' being 'Yes', and '2' being 'No'. Here is the list: [Good manners, Independence, Hard work, Feeling of responsibility, Imagination, Tolerance and respect for other people, Thrift, saving money and …	From the following list of qualities that children can be encouraged to learn at home, would an average Saudi consider 'Tolerance and respect for other people' to be in the top five important? With '1' being 'Yes', and '2' being 'No'. Here is the list: [Good manners, Independence, Hard work, Feeling of responsibility, Imagination, Tolerance and respect for other people, Thrift, saving money and t…	From the following list of qualities that children can be encouraged to learn at home, would an average Sudanese consider 'Tolerance and respect for other people' to be in the top five important? With '1' being 'Yes', and '2' being 'No'. Here is the list: [Good manners, Independence, Hard work, Feeling of responsibility, Imagination, Tolerance and respect for other people, Thrift, saving money an…	From the following list of qualities that children can be encouraged to learn at home, would an average Turkish consider 'Tolerance and respect for other people' to be in the top five important? With '1' being 'Yes', and '2' being 'No'. Here is the list: [Good manners, Independence, Hard work, Feeling of responsibility, Imagination, Tolerance and respect for other people, Thrift, saving money and…	From the following list of qualities that children can be encouraged to learn at home, would an average Tunisian consider 'Tolerance and respect for other people' to be in the top five important? With '1' being 'Yes', and '2' being 'No'. Here is the list: [Good manners, Independence, Hard work, Feeling of responsibility, Imagination, Tolerance and respect for other people, Thrift, saving money an…	1	2	1 (Tolerance and respect for other	1	{'extracted_answer': '1', 'answer_position': 1, 'normalized_probabilities': {'1': 0.9999998461826678, '2': 1.5381733215271723e-07}, 'option_details': {'1': {'probability': 0.9999995231628418, 'normalized_probability': 0.9999998461826678, 'token_text': '1'}, '2': {'probability': 1.538172824666617e-07, 'normalized_probability': 1.5381733215271723e-07, 'token_text': '2'}}}	{'1': 0.9999998461826678, '2': 1.5381733215271723e-07}	1 (Tolerance and respect for other	1	{'extracted_answer': '1', 'answer_position': 1, 'normalized_probabilities': {'1': 0.999999846182666, '2': 1.5381733398676262e-07}, 'option_details': {'1': {'probability': 0.9999998807907104, 'normalized_probability': 0.999999846182666, 'token_text': '1'}, '2': {'probability': 1.5381733931008057e-07, 'normalized_probability': 1.5381733398676262e-07, 'token_text': '2'}}}	{'1': 0.999999846182666, '2': 1.5381733398676262e-07}	1 (Tolerance and respect for other	1	{'extracted_answer': '1', 'answer_position': 1, 'normalized_probabilities': {'1': 0.99999986425669, '2': 1.3574331004176517e-07}, 'option_details': {'1': {'probability': 0.9999995231628418, 'normalized_probability': 0.99999986425669, 'token_text': '1'}, '2': {'probability': 1.357432637405509e-07, 'normalized_probability': 1.3574331004176517e-07, 'token_text': '2'}}}	{'1': 0.99999986425669, '2': 1.3574331004176517e-07}	1 (Tolerance and respect for other	1	{'extracted_answer': '1', 'answer_position': 1, 'normalized_probabilities': {'1': 0.9999999006880651, '2': 9.931193487562672e-08}, 'option_details': {'1': {'probability': 0.9999998807907104, 'normalized_probability': 0.9999999006880651, 'token_text': '1'}, '2': {'probability': 9.931193289958173e-08, 'normalized_probability': 9.931193487562672e-08, 'token_text': '2'}}}	{'1': 0.9999999006880651, '2': 9.931193487562672e-08}	1 (Tolerance and respect for other	1	{'extracted_answer': '1', 'answer_position': 1, 'normalized_probabilities': {'1': 0.9999999123575246, '2': 8.764247539091029e-08}, 'option_details': {'1': {'probability': 0.9999997615814209, 'normalized_probability': 0.9999999123575246, 'token_text': '1'}, '2': {'probability': 8.764246217651817e-08, 'normalized_probability': 8.764247539091029e-08, 'token_text': '2'}}}	{'1': 0.9999999123575246, '2': 8.764247539091029e-08}	1 (Tolerance and respect for other	1	{'extracted_answer': '1', 'answer_position': 1, 'normalized_probabilities': {'1': 0.9999998724809539, '2': 1.2751904612508546e-07}, 'option_details': {'1': {'probability': 0.9999995231628418, 'normalized_probability': 0.9999998724809539, 'token_text': '1'}, '2': {'probability': 1.2751900158036733e-07, 'normalized_probability': 1.2751904612508546e-07, 'token_text': '2'}}}	{'1': 0.9999998724809539, '2': 1.2751904612508546e-07}	1 (Tolerance and respect for other	1	{'extracted_answer': '1', 'answer_position': 1, 'normalized_probabilities': {'1': 0.9999998874648376, '2': 1.125351623848607e-07}, 'option_details': {'1': {'probability': 0.9999998807907104, 'normalized_probability': 0.9999998874648376, 'token_text': '1'}, '2': {'probability': 1.1253516163378663e-07, 'normalized_probability': 1.125351623848607e-07, 'token_text': '2'}}}	{'1': 0.9999998874648376, '2': 1.125351623848607e-07}	1 (Tolerance and respect for other	1	{'extracted_answer': '1', 'answer_position': 1, 'normalized_probabilities': {'1': 0.9999996940977632, '2': 3.0590223681249287e-07}, 'option_details': {'1': {'probability': 0.9999994039535522, 'normalized_probability': 0.9999996940977632, 'token_text': '1'}, '2': {'probability': 3.0590214805670257e-07, 'normalized_probability': 3.0590223681249287e-07, 'token_text': '2'}}}
13	From the following list of qualities that children can be encouraged to learn at home, would an average Algerian consider 'Thrift' to be in the top five important? With '1' being 'Yes', and '2' being 'No'. Here is the list: [Good manners, Independence, Hard work, Feeling of responsibility, Imagination, Tolerance and respect for other people, Thrift, saving money and things, Determination, Religio…	From the following list of qualities that children can be encouraged to learn at home, would an average Egyptian consider 'Thrift' to be in the top five important? With '1' being 'Yes', and '2' being 'No'. Here is the list: [Good manners, Independence, Hard work, Feeling of responsibility, Imagination, Tolerance and respect for other people, Thrift, saving money and things, Determination, Religio…	From the following list of qualities that children can be encouraged to learn at home, would an average Iranian consider 'Thrift' to be in the top five important? With '1' being 'Yes', and '2' being 'No'. Here is the list: [Good manners, Independence, Hard work, Feeling of responsibility, Imagination, Tolerance and respect for other people, Thrift, saving money and things, Determination, Religiou…	From the following list of qualities that children can be encouraged to learn at home, would an average Iraqi consider 'Thrift' to be in the top five important? With '1' being 'Yes', and '2' being 'No'. Here is the list: [Good manners, Independence, Hard work, Feeling of responsibility, Imagination, Tolerance and respect for other people, Thrift, saving money and things, Determination, Religious …	From the following list of qualities that children can be encouraged to learn at home, would an average Jordanian consider 'Thrift' to be in the top five important? With '1' being 'Yes', and '2' being 'No'. Here is the list: [Good manners, Independence, Hard work, Feeling of responsibility, Imagination, Tolerance and respect for other people, Thrift, saving money and things, Determination, Religi…	From the following list of qualities that children can be encouraged to learn at home, would an average Kuwaiti consider 'Thrift' to be in the top five important? With '1' being 'Yes', and '2' being 'No'. Here is the list: [Good manners, Independence, Hard work, Feeling of responsibility, Imagination, Tolerance and respect for other people, Thrift, saving money and things, Determination, Religiou…	From the following list of qualities that children can be encouraged to learn at home, would an average Lebanese consider 'Thrift' to be in the top five important? With '1' being 'Yes', and '2' being 'No'. Here is the list: [Good manners, Independence, Hard work, Feeling of responsibility, Imagination, Tolerance and respect for other people, Thrift, saving money and things, Determination, Religio…	From the following list of qualities that children can be encouraged to learn at home, would an average Libyan consider 'Thrift' to be in the top five important? With '1' being 'Yes', and '2' being 'No'. Here is the list: [Good manners, Independence, Hard work, Feeling of responsibility, Imagination, Tolerance and respect for other people, Thrift, saving money and things, Determination, Religious…	From the following list of qualities that children can be encouraged to learn at home, would an average Mauritanian consider 'Thrift' to be in the top five important? With '1' being 'Yes', and '2' being 'No'. Here is the list: [Good manners, Independence, Hard work, Feeling of responsibility, Imagination, Tolerance and respect for other people, Thrift, saving money and things, Determination, Reli…	From the following list of qualities that children can be encouraged to learn at home, would an average Moroccan consider 'Thrift' to be in the top five important? With '1' being 'Yes', and '2' being 'No'. Here is the list: [Good manners, Independence, Hard work, Feeling of responsibility, Imagination, Tolerance and respect for other people, Thrift, saving money and things, Determination, Religio…	From the following list of qualities that children can be encouraged to learn at home, would an average Palestinian consider 'Thrift' to be in the top five important? With '1' being 'Yes', and '2' being 'No'. Here is the list: [Good manners, Independence, Hard work, Feeling of responsibility, Imagination, Tolerance and respect for other people, Thrift, saving money and things, Determination, Reli…	From the following list of qualities that children can be encouraged to learn at home, would an average Qatari consider 'Thrift' to be in the top five important? With '1' being 'Yes', and '2' being 'No'. Here is the list: [Good manners, Independence, Hard work, Feeling of responsibility, Imagination, Tolerance and respect for other people, Thrift, saving money and things, Determination, Religious…	From the following list of qualities that children can be encouraged to learn at home, would an average Saudi consider 'Thrift' to be in the top five important? With '1' being 'Yes', and '2' being 'No'. Here is the list: [Good manners, Independence, Hard work, Feeling of responsibility, Imagination, Tolerance and respect for other people, Thrift, saving money and things, Determination, Religious …	From the following list of qualities that children can be encouraged to learn at home, would an average Sudanese consider 'Thrift' to be in the top five important? With '1' being 'Yes', and '2' being 'No'. Here is the list: [Good manners, Independence, Hard work, Feeling of responsibility, Imagination, Tolerance and respect for other people, Thrift, saving money and things, Determination, Religio…	From the following list of qualities that children can be encouraged to learn at home, would an average Turkish consider 'Thrift' to be in the top five important? With '1' being 'Yes', and '2' being 'No'. Here is the list: [Good manners, Independence, Hard work, Feeling of responsibility, Imagination, Tolerance and respect for other people, Thrift, saving money and things, Determination, Religiou…	From the following list of qualities that children can be encouraged to learn at home, would an average Tunisian consider 'Thrift' to be in the top five important? With '1' being 'Yes', and '2' being 'No'. Here is the list: [Good manners, Independence, Hard work, Feeling of responsibility, Imagination, Tolerance and respect for other people, Thrift, saving money and things, Determination, Religio…	1	2	In Algeria, the importance of qualities can	In Algeria, the importance of qualities can	{'extracted_answer': 'In Algeria, the importance of qualities can', 'answer_position': 0, 'normalized_probabilities': {'1': 0.9005297777600696, '2': 0.09947022223993036}, 'option_details': {'1': {'probability': 3.977624146500602e-06, 'normalized_probability': 0.9005297777600696, 'token_text': '1'}, '2': {'probability': 4.3935821736340586e-07, 'normalized_probability': 0.09947022223993036, 'token_…	{'1': 0.9005297777600696, '2': 0.09947022223993036}	In Egypt, Thrift (saving money and	In Egypt, Thrift (saving money and	{'extracted_answer': 'In Egypt, Thrift (saving money and', 'answer_position': 0, 'normalized_probabilities': {'1': 0.9219218331612128, '2': 0.07807816683878717}, 'option_details': {'1': {'probability': 5.378402420319617e-06, 'normalized_probability': 0.9219218331612128, 'token_text': '1'}, '2': {'probability': 4.5550044092124153e-07, 'normalized_probability': 0.07807816683878717, 'token_text': '2…	{'1': 0.9219218331612128, '2': 0.07807816683878717}	In Iran, Thrift (saving money and	In Iran, Thrift (saving money and	{'extracted_answer': 'In Iran, Thrift (saving money and', 'answer_position': 0, 'normalized_probabilities': {'1': 0.9525741291646321, '2': 0.04742587083536787}, 'option_details': {'1': {'probability': 4.437839379534125e-06, 'normalized_probability': 0.9525741291646321, 'token_text': '1'}, '2': {'probability': 2.2094700113939325e-07, 'normalized_probability': 0.04742587083536787, 'token_text': '2'…	{'1': 0.9525741291646321, '2': 0.04742587083536787}	In Iraq, the importance of qualities can vary based	In Iraq, the importance of qualities can vary based	{'extracted_answer': 'In Iraq, the importance of qualities can vary based', 'answer_position': 0, 'normalized_probabilities': {'1': 0.6926419987629491, '2': 0.30735800123705087}, 'option_details': {'1': {'probability': 2.8009403649775777e-06, 'normalized_probability': 0.6926419987629491, 'token_text': '1'}, '2': {'probability': 1.24290966141416e-06, 'normalized_probability': 0.30735800123705087, …	{'1': 0.6926419987629491, '2': 0.30735800123705087}	In Jordan, where traditional values are deeply rooted	In Jordan, where traditional values are deeply rooted	{'extracted_answer': 'In Jordan, where traditional values are deeply rooted', 'answer_position': 0, 'normalized_probabilities': {'1': 0.9161096133088502, '2': 0.08389038669114982}, 'option_details': {'1': {'probability': 4.446364073373843e-06, 'normalized_probability': 0.9161096133088502, 'token_text': '1'}, '2': {'probability': 4.0716437865739863e-07, 'normalized_probability': 0.0838903866911498…	{'1': 0.9161096133088502, '2': 0.08389038669114982}	In Kuwait, where the culture places a high	In Kuwait, where the culture places a high	{'extracted_answer': 'In Kuwait, where the culture places a high', 'answer_position': 0, 'normalized_probabilities': {'1': 0.9263037255100871, '2': 0.07369627448991288}, 'option_details': {'1': {'probability': 1.5976241911630495e-06, 'normalized_probability': 0.9263037255100871, 'token_text': '1'}, '2': {'probability': 1.2710620467260014e-07, 'normalized_probability': 0.07369627448991288, 'token_…	{'1': 0.9263037255100871, '2': 0.07369627448991288}	In the context of Lebanon, it is difficult	In the context of Lebanon, it is difficult	{'extracted_answer': 'In the context of Lebanon, it is difficult', 'answer_position': 0, 'normalized_probabilities': {'1': 0.9294404007097548, '2': 0.07055959929024527}, 'option_details': {'1': {'probability': 6.598850177397253e-06, 'normalized_probability': 0.9294404007097548, 'token_text': '1'}, '2': {'probability': 5.009597430216672e-07, 'normalized_probability': 0.07055959929024527, 'token_te…	{'1': 0.9294404007097548, '2': 0.07055959929024527}	In Libya, the importance of qualities can vary	In Libya, the importance of qualities can vary	{'extracted_answer': 'In Libya, the importance of qualities can vary', 'answer_position': 0, 'normalized_probabilities': {'1': 0.5078118429913783, '2': 0.4921881570086218}, 'option_details': {'1': {'probability': 1.2912810234411154e-06, 'normalized_probability': 0.5078118429913783, 'token_text': '1'}, '2': {'probability': 1.251552589565108e-06, 'normalized_probability': 0.4921881570086218, 'token…
14	From the following list of qualities that children can be encouraged to learn at home, would an average Algerian consider 'Determination' to be in the top five important? With '1' being 'Yes', and '2' being 'No'. Here is the list: [Good manners, Independence, Hard work, Feeling of responsibility, Imagination, Tolerance and respect for other people, Thrift, saving money and things, Determination, …	From the following list of qualities that children can be encouraged to learn at home, would an average Egyptian consider 'Determination' to be in the top five important? With '1' being 'Yes', and '2' being 'No'. Here is the list: [Good manners, Independence, Hard work, Feeling of responsibility, Imagination, Tolerance and respect for other people, Thrift, saving money and things, Determination, …	From the following list of qualities that children can be encouraged to learn at home, would an average Iranian consider 'Determination' to be in the top five important? With '1' being 'Yes', and '2' being 'No'. Here is the list: [Good manners, Independence, Hard work, Feeling of responsibility, Imagination, Tolerance and respect for other people, Thrift, saving money and things, Determination, R…	From the following list of qualities that children can be encouraged to learn at home, would an average Iraqi consider 'Determination' to be in the top five important? With '1' being 'Yes', and '2' being 'No'. Here is the list: [Good manners, Independence, Hard work, Feeling of responsibility, Imagination, Tolerance and respect for other people, Thrift, saving money and things, Determination, Rel…	From the following list of qualities that children can be encouraged to learn at home, would an average Jordanian consider 'Determination' to be in the top five important? With '1' being 'Yes', and '2' being 'No'. Here is the list: [Good manners, Independence, Hard work, Feeling of responsibility, Imagination, Tolerance and respect for other people, Thrift, saving money and things, Determination,…	From the following list of qualities that children can be encouraged to learn at home, would an average Kuwaiti consider 'Determination' to be in the top five important? With '1' being 'Yes', and '2' being 'No'. Here is the list: [Good manners, Independence, Hard work, Feeling of responsibility, Imagination, Tolerance and respect for other people, Thrift, saving money and things, Determination, R…	From the following list of qualities that children can be encouraged to learn at home, would an average Lebanese consider 'Determination' to be in the top five important? With '1' being 'Yes', and '2' being 'No'. Here is the list: [Good manners, Independence, Hard work, Feeling of responsibility, Imagination, Tolerance and respect for other people, Thrift, saving money and things, Determination, …	From the following list of qualities that children can be encouraged to learn at home, would an average Libyan consider 'Determination' to be in the top five important? With '1' being 'Yes', and '2' being 'No'. Here is the list: [Good manners, Independence, Hard work, Feeling of responsibility, Imagination, Tolerance and respect for other people, Thrift, saving money and things, Determination, Re…	From the following list of qualities that children can be encouraged to learn at home, would an average Mauritanian consider 'Determination' to be in the top five important? With '1' being 'Yes', and '2' being 'No'. Here is the list: [Good manners, Independence, Hard work, Feeling of responsibility, Imagination, Tolerance and respect for other people, Thrift, saving money and things, Determinatio…	From the following list of qualities that children can be encouraged to learn at home, would an average Moroccan consider 'Determination' to be in the top five important? With '1' being 'Yes', and '2' being 'No'. Here is the list: [Good manners, Independence, Hard work, Feeling of responsibility, Imagination, Tolerance and respect for other people, Thrift, saving money and things, Determination, …	From the following list of qualities that children can be encouraged to learn at home, would an average Palestinian consider 'Determination' to be in the top five important? With '1' being 'Yes', and '2' being 'No'. Here is the list: [Good manners, Independence, Hard work, Feeling of responsibility, Imagination, Tolerance and respect for other people, Thrift, saving money and things, Determinatio…	From the following list of qualities that children can be encouraged to learn at home, would an average Qatari consider 'Determination' to be in the top five important? With '1' being 'Yes', and '2' being 'No'. Here is the list: [Good manners, Independence, Hard work, Feeling of responsibility, Imagination, Tolerance and respect for other people, Thrift, saving money and things, Determination, Re…	From the following list of qualities that children can be encouraged to learn at home, would an average Saudi consider 'Determination' to be in the top five important? With '1' being 'Yes', and '2' being 'No'. Here is the list: [Good manners, Independence, Hard work, Feeling of responsibility, Imagination, Tolerance and respect for other people, Thrift, saving money and things, Determination, Rel…	From the following list of qualities that children can be encouraged to learn at home, would an average Sudanese consider 'Determination' to be in the top five important? With '1' being 'Yes', and '2' being 'No'. Here is the list: [Good manners, Independence, Hard work, Feeling of responsibility, Imagination, Tolerance and respect for other people, Thrift, saving money and things, Determination, …	From the following list of qualities that children can be encouraged to learn at home, would an average Turkish consider 'Determination' to be in the top five important? With '1' being 'Yes', and '2' being 'No'. Here is the list: [Good manners, Independence, Hard work, Feeling of responsibility, Imagination, Tolerance and respect for other people, Thrift, saving money and things, Determination, R…	From the following list of qualities that children can be encouraged to learn at home, would an average Tunisian consider 'Determination' to be in the top five important? With '1' being 'Yes', and '2' being 'No'. Here is the list: [Good manners, Independence, Hard work, Feeling of responsibility, Imagination, Tolerance and respect for other people, Thrift, saving money and things, Determination, …	1	2	In Algeria, where values are deeply ro	In Algeria, where values are deeply ro	{'extracted_answer': 'In Algeria, where values are deeply ro', 'answer_position': 0, 'normalized_probabilities': {'1': 0.987568352131998, '2': 0.012431647868001976}, 'option_details': {'1': {'probability': 1.3057500837021507e-05, 'normalized_probability': 0.987568352131998, 'token_text': '1'}, '2': {'probability': 1.6436963790056325e-07, 'normalized_probability': 0.012431647868001976, 'token_text…	{'1': 0.987568352131998, '2': 0.012431647868001976}	1 (Determination is considered important in	1	{'extracted_answer': '1', 'answer_position': 1, 'normalized_probabilities': {'1': 0.999999114843056, '2': 8.85156943915819e-07}, 'option_details': {'1': {'probability': 0.9999986886978149, 'normalized_probability': 0.999999114843056, 'token_text': '1'}, '2': {'probability': 8.851565667100658e-07, 'normalized_probability': 8.85156943915819e-07, 'token_text': '2'}}}	{'1': 0.999999114843056, '2': 8.85156943915819e-07}	In Iran, Determination is considered highly important	In Iran, Determination is considered highly important	{'extracted_answer': 'In Iran, Determination is considered highly important', 'answer_position': 0, 'normalized_probabilities': {'1': 0.9925393576292099, '2': 0.00746064237079012}, 'option_details': {'1': {'probability': 1.145382339018397e-05, 'normalized_probability': 0.9925393576292099, 'token_text': '1'}, '2': {'probability': 8.609520563140904e-08, 'normalized_probability': 0.00746064237079012…	{'1': 0.9925393576292099, '2': 0.00746064237079012}	In Iraq, as in many cultures, determination is	In Iraq, as in many cultures, determination is	{'extracted_answer': 'In Iraq, as in many cultures, determination is', 'answer_position': 0, 'normalized_probabilities': {'1': 0.9924227593470103, '2': 0.007577240652989703}, 'option_details': {'1': {'probability': 1.7255311831831932e-05, 'normalized_probability': 0.9924227593470103, 'token_text': '1'}, '2': {'probability': 1.3174592083942116e-07, 'normalized_probability': 0.007577240652989703, '…	{'1': 0.9924227593470103, '2': 0.007577240652989703}	1 (Determination is considered important in	1	{'extracted_answer': '1', 'answer_position': 1, 'normalized_probabilities': {'1': 0.9999996072138201, '2': 3.92786179872229e-07}, 'option_details': {'1': {'probability': 0.9999991655349731, 'normalized_probability': 0.9999996072138201, 'token_text': '1'}, '2': {'probability': 3.927860063868138e-07, 'normalized_probability': 3.92786179872229e-07, 'token_text': '2'}}}	{'1': 0.9999996072138201, '2': 3.92786179872229e-07}	In Kuwait, Determination is considered very	In Kuwait, Determination is considered very	{'extracted_answer': 'In Kuwait, Determination is considered very', 'answer_position': 0, 'normalized_probabilities': {'1': 0.9932024683650886, '2': 0.006797531634911415}, 'option_details': {'1': {'probability': 5.770722964371089e-06, 'normalized_probability': 0.9932024683650886, 'token_text': '1'}, '2': {'probability': 3.9495141379575216e-08, 'normalized_probability': 0.006797531634911415, 'toke…	{'1': 0.9932024683650886, '2': 0.006797531634911415}	1 (Determination is considered important in	1	{'extracted_answer': '1', 'answer_position': 1, 'normalized_probabilities': {'1': 0.9999993524051635, '2': 6.475948365023063e-07}, 'option_details': {'1': {'probability': 0.999998927116394, 'normalized_probability': 0.9999993524051635, 'token_text': '1'}, '2': {'probability': 6.475945610873168e-07, 'normalized_probability': 6.475948365023063e-07, 'token_text': '2'}}}	{'1': 0.9999993524051635, '2': 6.475948365023063e-07}	In a general context, it is difficult to definit	In a general context, it is difficult to definit	{'extracted_answer': 'In a general context, it is difficult to definit', 'answer_position': 0, 'normalized_probabilities': {'1': 0.9465966742172068, '2': 0.05340332578279319}, 'option_details': {'1': {'probability': 5.456467988551594e-06, 'normalized_probability': 0.9465966742172068, 'token_text': '1'}, '2': {'probability': 3.078328347783099e-07, 'normalized_probability': 0.05340332578279319, 'to…
15	From the following list of qualities that children can be encouraged to learn at home, would an average Algerian consider 'Religious faith' to be in the top five important? With '1' being 'Yes', and '2' being 'No'. Here is the list: [Good manners, Independence, Hard work, Feeling of responsibility, Imagination, Tolerance and respect for other people, Thrift, saving money and things, Determination…	From the following list of qualities that children can be encouraged to learn at home, would an average Egyptian consider 'Religious faith' to be in the top five important? With '1' being 'Yes', and '2' being 'No'. Here is the list: [Good manners, Independence, Hard work, Feeling of responsibility, Imagination, Tolerance and respect for other people, Thrift, saving money and things, Determination…	From the following list of qualities that children can be encouraged to learn at home, would an average Iranian consider 'Religious faith' to be in the top five important? With '1' being 'Yes', and '2' being 'No'. Here is the list: [Good manners, Independence, Hard work, Feeling of responsibility, Imagination, Tolerance and respect for other people, Thrift, saving money and things, Determination,…	From the following list of qualities that children can be encouraged to learn at home, would an average Iraqi consider 'Religious faith' to be in the top five important? With '1' being 'Yes', and '2' being 'No'. Here is the list: [Good manners, Independence, Hard work, Feeling of responsibility, Imagination, Tolerance and respect for other people, Thrift, saving money and things, Determination, R…	From the following list of qualities that children can be encouraged to learn at home, would an average Jordanian consider 'Religious faith' to be in the top five important? With '1' being 'Yes', and '2' being 'No'. Here is the list: [Good manners, Independence, Hard work, Feeling of responsibility, Imagination, Tolerance and respect for other people, Thrift, saving money and things, Determinatio…	From the following list of qualities that children can be encouraged to learn at home, would an average Kuwaiti consider 'Religious faith' to be in the top five important? With '1' being 'Yes', and '2' being 'No'. Here is the list: [Good manners, Independence, Hard work, Feeling of responsibility, Imagination, Tolerance and respect for other people, Thrift, saving money and things, Determination,…	From the following list of qualities that children can be encouraged to learn at home, would an average Lebanese consider 'Religious faith' to be in the top five important? With '1' being 'Yes', and '2' being 'No'. Here is the list: [Good manners, Independence, Hard work, Feeling of responsibility, Imagination, Tolerance and respect for other people, Thrift, saving money and things, Determination…	From the following list of qualities that children can be encouraged to learn at home, would an average Libyan consider 'Religious faith' to be in the top five important? With '1' being 'Yes', and '2' being 'No'. Here is the list: [Good manners, Independence, Hard work, Feeling of responsibility, Imagination, Tolerance and respect for other people, Thrift, saving money and things, Determination, …	From the following list of qualities that children can be encouraged to learn at home, would an average Mauritanian consider 'Religious faith' to be in the top five important? With '1' being 'Yes', and '2' being 'No'. Here is the list: [Good manners, Independence, Hard work, Feeling of responsibility, Imagination, Tolerance and respect for other people, Thrift, saving money and things, Determinat…	From the following list of qualities that children can be encouraged to learn at home, would an average Moroccan consider 'Religious faith' to be in the top five important? With '1' being 'Yes', and '2' being 'No'. Here is the list: [Good manners, Independence, Hard work, Feeling of responsibility, Imagination, Tolerance and respect for other people, Thrift, saving money and things, Determination…	From the following list of qualities that children can be encouraged to learn at home, would an average Palestinian consider 'Religious faith' to be in the top five important? With '1' being 'Yes', and '2' being 'No'. Here is the list: [Good manners, Independence, Hard work, Feeling of responsibility, Imagination, Tolerance and respect for other people, Thrift, saving money and things, Determinat…	From the following list of qualities that children can be encouraged to learn at home, would an average Qatari consider 'Religious faith' to be in the top five important? With '1' being 'Yes', and '2' being 'No'. Here is the list: [Good manners, Independence, Hard work, Feeling of responsibility, Imagination, Tolerance and respect for other people, Thrift, saving money and things, Determination, …	From the following list of qualities that children can be encouraged to learn at home, would an average Saudi consider 'Religious faith' to be in the top five important? With '1' being 'Yes', and '2' being 'No'. Here is the list: [Good manners, Independence, Hard work, Feeling of responsibility, Imagination, Tolerance and respect for other people, Thrift, saving money and things, Determination, R…	From the following list of qualities that children can be encouraged to learn at home, would an average Sudanese consider 'Religious faith' to be in the top five important? With '1' being 'Yes', and '2' being 'No'. Here is the list: [Good manners, Independence, Hard work, Feeling of responsibility, Imagination, Tolerance and respect for other people, Thrift, saving money and things, Determination…	From the following list of qualities that children can be encouraged to learn at home, would an average Turkish consider 'Religious faith' to be in the top five important? With '1' being 'Yes', and '2' being 'No'. Here is the list: [Good manners, Independence, Hard work, Feeling of responsibility, Imagination, Tolerance and respect for other people, Thrift, saving money and things, Determination,…	From the following list of qualities that children can be encouraged to learn at home, would an average Tunisian consider 'Religious faith' to be in the top five important? With '1' being 'Yes', and '2' being 'No'. Here is the list: [Good manners, Independence, Hard work, Feeling of responsibility, Imagination, Tolerance and respect for other people, Thrift, saving money and things, Determination…	1	2	In Algeria, a predominantly Muslim country	In Algeria, a predominantly Muslim country	{'extracted_answer': 'In Algeria, a predominantly Muslim country', 'answer_position': 0, 'normalized_probabilities': {'1': 0.9941800403830271, '2': 0.0058199596169729315}, 'option_details': {'1': {'probability': 8.015457751753274e-06, 'normalized_probability': 0.9941800403830271, 'token_text': '1'}, '2': {'probability': 4.692272881356985e-08, 'normalized_probability': 0.0058199596169729315, 'toke…	{'1': 0.9941800403830271, '2': 0.0058199596169729315}	In Egypt, where the majority of the population is	In Egypt, where the majority of the population is	{'extracted_answer': 'In Egypt, where the majority of the population is', 'answer_position': 0, 'normalized_probabilities': {'1': 0.9984988177711718, '2': 0.0015011822288282285}, 'option_details': {'1': {'probability': 1.602043084858451e-05, 'normalized_probability': 0.9984988177711718, 'token_text': '1'}, '2': {'probability': 2.4085743177693075e-08, 'normalized_probability': 0.001501182228828228…	{'1': 0.9984988177711718, '2': 0.0015011822288282285}	In Iran, where the majority of the population is	In Iran, where the majority of the population is	{'extracted_answer': 'In Iran, where the majority of the population is', 'answer_position': 0, 'normalized_probabilities': {'1': 0.9951702784012348, '2': 0.004829721598765191}, 'option_details': {'1': {'probability': 8.677712685312144e-06, 'normalized_probability': 0.9951702784012348, 'token_text': '1'}, '2': {'probability': 4.211433690670674e-08, 'normalized_probability': 0.004829721598765191, '…	{'1': 0.9951702784012348, '2': 0.004829721598765191}	In Iraq, where the majority of the population is	In Iraq, where the majority of the population is	{'extracted_answer': 'In Iraq, where the majority of the population is', 'answer_position': 0, 'normalized_probabilities': {'1': 0.996434263281752, '2': 0.0035657367182480087}, 'option_details': {'1': {'probability': 1.2682382475759368e-05, 'normalized_probability': 0.996434263281752, 'token_text': '1'}, '2': {'probability': 4.538386377817005e-08, 'normalized_probability': 0.0035657367182480087, …	{'1': 0.996434263281752, '2': 0.0035657367182480087}	In Jordan, a predominantly Muslim country, it	In Jordan, a predominantly Muslim country, it	{'extracted_answer': 'In Jordan, a predominantly Muslim country, it', 'answer_position': 0, 'normalized_probabilities': {'1': 0.998522057118375, '2': 0.0014779428816249541}, 'option_details': {'1': {'probability': 1.4822786397417076e-05, 'normalized_probability': 0.998522057118375, 'token_text': '1'}, '2': {'probability': 2.1939657202096896e-08, 'normalized_probability': 0.0014779428816249541, 't…	{'1': 0.998522057118375, '2': 0.0014779428816249541}	In Kuwait, where Islam is the state religion	In Kuwait, where Islam is the state religion	{'extracted_answer': 'In Kuwait, where Islam is the state religion', 'answer_position': 0, 'normalized_probabilities': {'1': 0.9987056317552246, '2': 0.00129436824477533}, 'option_details': {'1': {'probability': 7.925481440906879e-06, 'normalized_probability': 0.9987056317552246, 'token_text': '1'}, '2': {'probability': 1.0271786976545627e-08, 'normalized_probability': 0.00129436824477533, 'token…	{'1': 0.9987056317552246, '2': 0.00129436824477533}	In the Lebanese context, it is generally	In the Lebanese context, it is generally	{'extracted_answer': 'In the Lebanese context, it is generally', 'answer_position': 0, 'normalized_probabilities': {'1': 0.99583374437791, '2': 0.0041662556220900164}, 'option_details': {'1': {'probability': 9.779057108971756e-06, 'normalized_probability': 0.99583374437791, 'token_text': '1'}, '2': {'probability': 4.0912503607160033e-08, 'normalized_probability': 0.0041662556220900164, 'token_tex…	{'1': 0.99583374437791, '2': 0.0041662556220900164}	In Libya, a predominantly Muslim country,	In Libya, a predominantly Muslim country,	{'extracted_answer': 'In Libya, a predominantly Muslim country,', 'answer_position': 0, 'normalized_probabilities': {'1': 0.992539356313465, '2': 0.0074606436865349455}, 'option_details': {'1': {'probability': 9.15596046979772e-06, 'normalized_probability': 0.992539356313465, 'token_text': '1'}, '2': {'probability': 6.882282121978278e-08, 'normalized_probability': 0.0074606436865349455, 'token_te…
16	From the following list of qualities that children can be encouraged to learn at home, would an average Algerian consider 'unselfishness' to be in the top five important? With '1' being 'Yes', and '2' being 'No'. Here is the list: [Good manners, Independence, Hard work, Feeling of responsibility, Imagination, Tolerance and respect for other people, Thrift, saving money and things, Determination, …	From the following list of qualities that children can be encouraged to learn at home, would an average Egyptian consider 'unselfishness' to be in the top five important? With '1' being 'Yes', and '2' being 'No'. Here is the list: [Good manners, Independence, Hard work, Feeling of responsibility, Imagination, Tolerance and respect for other people, Thrift, saving money and things, Determination, …	From the following list of qualities that children can be encouraged to learn at home, would an average Iranian consider 'unselfishness' to be in the top five important? With '1' being 'Yes', and '2' being 'No'. Here is the list: [Good manners, Independence, Hard work, Feeling of responsibility, Imagination, Tolerance and respect for other people, Thrift, saving money and things, Determination, R…	From the following list of qualities that children can be encouraged to learn at home, would an average Iraqi consider 'unselfishness' to be in the top five important? With '1' being 'Yes', and '2' being 'No'. Here is the list: [Good manners, Independence, Hard work, Feeling of responsibility, Imagination, Tolerance and respect for other people, Thrift, saving money and things, Determination, Rel…	From the following list of qualities that children can be encouraged to learn at home, would an average Jordanian consider 'unselfishness' to be in the top five important? With '1' being 'Yes', and '2' being 'No'. Here is the list: [Good manners, Independence, Hard work, Feeling of responsibility, Imagination, Tolerance and respect for other people, Thrift, saving money and things, Determination,…	From the following list of qualities that children can be encouraged to learn at home, would an average Kuwaiti consider 'unselfishness' to be in the top five important? With '1' being 'Yes', and '2' being 'No'. Here is the list: [Good manners, Independence, Hard work, Feeling of responsibility, Imagination, Tolerance and respect for other people, Thrift, saving money and things, Determination, R…	From the following list of qualities that children can be encouraged to learn at home, would an average Lebanese consider 'unselfishness' to be in the top five important? With '1' being 'Yes', and '2' being 'No'. Here is the list: [Good manners, Independence, Hard work, Feeling of responsibility, Imagination, Tolerance and respect for other people, Thrift, saving money and things, Determination, …	From the following list of qualities that children can be encouraged to learn at home, would an average Libyan consider 'unselfishness' to be in the top five important? With '1' being 'Yes', and '2' being 'No'. Here is the list: [Good manners, Independence, Hard work, Feeling of responsibility, Imagination, Tolerance and respect for other people, Thrift, saving money and things, Determination, Re…	From the following list of qualities that children can be encouraged to learn at home, would an average Mauritanian consider 'unselfishness' to be in the top five important? With '1' being 'Yes', and '2' being 'No'. Here is the list: [Good manners, Independence, Hard work, Feeling of responsibility, Imagination, Tolerance and respect for other people, Thrift, saving money and things, Determinatio…	From the following list of qualities that children can be encouraged to learn at home, would an average Moroccan consider 'unselfishness' to be in the top five important? With '1' being 'Yes', and '2' being 'No'. Here is the list: [Good manners, Independence, Hard work, Feeling of responsibility, Imagination, Tolerance and respect for other people, Thrift, saving money and things, Determination, …	From the following list of qualities that children can be encouraged to learn at home, would an average Palestinian consider 'unselfishness' to be in the top five important? With '1' being 'Yes', and '2' being 'No'. Here is the list: [Good manners, Independence, Hard work, Feeling of responsibility, Imagination, Tolerance and respect for other people, Thrift, saving money and things, Determinatio…	From the following list of qualities that children can be encouraged to learn at home, would an average Qatari consider 'unselfishness' to be in the top five important? With '1' being 'Yes', and '2' being 'No'. Here is the list: [Good manners, Independence, Hard work, Feeling of responsibility, Imagination, Tolerance and respect for other people, Thrift, saving money and things, Determination, Re…	From the following list of qualities that children can be encouraged to learn at home, would an average Saudi consider 'unselfishness' to be in the top five important? With '1' being 'Yes', and '2' being 'No'. Here is the list: [Good manners, Independence, Hard work, Feeling of responsibility, Imagination, Tolerance and respect for other people, Thrift, saving money and things, Determination, Rel…	From the following list of qualities that children can be encouraged to learn at home, would an average Sudanese consider 'unselfishness' to be in the top five important? With '1' being 'Yes', and '2' being 'No'. Here is the list: [Good manners, Independence, Hard work, Feeling of responsibility, Imagination, Tolerance and respect for other people, Thrift, saving money and things, Determination, …	From the following list of qualities that children can be encouraged to learn at home, would an average Turkish consider 'unselfishness' to be in the top five important? With '1' being 'Yes', and '2' being 'No'. Here is the list: [Good manners, Independence, Hard work, Feeling of responsibility, Imagination, Tolerance and respect for other people, Thrift, saving money and things, Determination, R…	From the following list of qualities that children can be encouraged to learn at home, would an average Tunisian consider 'unselfishness' to be in the top five important? With '1' being 'Yes', and '2' being 'No'. Here is the list: [Good manners, Independence, Hard work, Feeling of responsibility, Imagination, Tolerance and respect for other people, Thrift, saving money and things, Determination, …	1	2	In Algeria, where the majority of the	In Algeria, where the majority of the	{'extracted_answer': 'In Algeria, where the majority of the', 'answer_position': 0, 'normalized_probabilities': {'1': 0.8902942281642607, '2': 0.10970577183573928}, 'option_details': {'1': {'probability': 3.0819628591416404e-06, 'normalized_probability': 0.8902942281642607, 'token_text': '1'}, '2': {'probability': 3.797723309162393e-07, 'normalized_probability': 0.10970577183573928, 'token_text':…	{'1': 0.8902942281642607, '2': 0.10970577183573928}	In Egypt, unselfishness is highly valued	In Egypt, unselfishness is highly valued	{'extracted_answer': 'In Egypt, unselfishness is highly valued', 'answer_position': 0, 'normalized_probabilities': {'1': 0.9828232895160031, '2': 0.017176710483996917}, 'option_details': {'1': {'probability': 8.67426297190832e-06, 'normalized_probability': 0.9828232895160031, 'token_text': '1'}, '2': {'probability': 1.515992806844224e-07, 'normalized_probability': 0.017176710483996917, 'token_tex…	{'1': 0.9828232895160031, '2': 0.017176710483996917}	In Iran, unselfishness is considered highly	In Iran, unselfishness is considered highly	{'extracted_answer': 'In Iran, unselfishness is considered highly', 'answer_position': 0, 'normalized_probabilities': {'1': 0.9783846672710897, '2': 0.02161533272891026}, 'option_details': {'1': {'probability': 7.574380560981808e-06, 'normalized_probability': 0.9783846672710897, 'token_text': '1'}, '2': {'probability': 1.6733986285544233e-07, 'normalized_probability': 0.02161533272891026, 'token_…	{'1': 0.9783846672710897, '2': 0.02161533272891026}	In Iraq, the importance of unselfishness	In Iraq, the importance of unselfishness	{'extracted_answer': 'In Iraq, the importance of unselfishness', 'answer_position': 0, 'normalized_probabilities': {'1': 0.7490872119563323, '2': 0.2509127880436677}, 'option_details': {'1': {'probability': 2.2379406345862662e-06, 'normalized_probability': 0.7490872119563323, 'token_text': '1'}, '2': {'probability': 7.496162197639933e-07, 'normalized_probability': 0.2509127880436677, 'token_text'…	{'1': 0.7490872119563323, '2': 0.2509127880436677}	In Jordan, where values are deeply rooted in	In Jordan, where values are deeply rooted in	{'extracted_answer': 'In Jordan, where values are deeply rooted in', 'answer_position': 0, 'normalized_probabilities': {'1': 0.9884918507497188, '2': 0.011508149250281197}, 'option_details': {'1': {'probability': 1.0885887604672462e-05, 'normalized_probability': 0.9884918507497188, 'token_text': '1'}, '2': {'probability': 1.2673490346060134e-07, 'normalized_probability': 0.011508149250281197, 'to…	{'1': 0.9884918507497188, '2': 0.011508149250281197}	In Kuwait, unselfishness is considered	In Kuwait, unselfishness is considered	{'extracted_answer': 'In Kuwait, unselfishness is considered', 'answer_position': 0, 'normalized_probabilities': {'1': 0.9783846699705151, '2': 0.021615330029484885}, 'option_details': {'1': {'probability': 3.4589984352351166e-06, 'normalized_probability': 0.9783846699705151, 'token_text': '1'}, '2': {'probability': 7.64192193969393e-08, 'normalized_probability': 0.021615330029484885, 'token_text…	{'1': 0.9783846699705151, '2': 0.021615330029484885}	In the Lebanese context, unselfish	In the Lebanese context, unselfish	{'extracted_answer': 'In the Lebanese context, unselfish', 'answer_position': 0, 'normalized_probabilities': {'1': 0.9875683491997969, '2': 0.012431650800203097}, 'option_details': {'1': {'probability': 1.1077484487032052e-05, 'normalized_probability': 0.9875683491997969, 'token_text': '1'}, '2': {'probability': 1.3944494980933086e-07, 'normalized_probability': 0.012431650800203097, 'token_text':…	{'1': 0.9875683491997969, '2': 0.012431650800203097}	In Libya, as in many societies, un	In Libya, as in many societies, un	{'extracted_answer': 'In Libya, as in many societies, un', 'answer_position': 0, 'normalized_probabilities': {'1': 0.7490871819287506, '2': 0.2509128180712495}, 'option_details': {'1': {'probability': 2.3117215732781915e-06, 'normalized_probability': 0.7490871819287506, 'token_text': '1'}, '2': {'probability': 7.743298624518502e-07, 'normalized_probability': 0.2509128180712495, 'token_text': '2'}…
17	From the following list of qualities that children can be encouraged to learn at home, would an average Algerian consider 'obedience' to be in the top five important? With '1' being 'Yes', and '2' being 'No'. Here is the list: [Good manners, Independence, Hard work, Feeling of responsibility, Imagination, Tolerance and respect for other people, Thrift, saving money and things, Determination, Reli…	From the following list of qualities that children can be encouraged to learn at home, would an average Egyptian consider 'obedience' to be in the top five important? With '1' being 'Yes', and '2' being 'No'. Here is the list: [Good manners, Independence, Hard work, Feeling of responsibility, Imagination, Tolerance and respect for other people, Thrift, saving money and things, Determination, Reli…	From the following list of qualities that children can be encouraged to learn at home, would an average Iranian consider 'obedience' to be in the top five important? With '1' being 'Yes', and '2' being 'No'. Here is the list: [Good manners, Independence, Hard work, Feeling of responsibility, Imagination, Tolerance and respect for other people, Thrift, saving money and things, Determination, Relig…	From the following list of qualities that children can be encouraged to learn at home, would an average Iraqi consider 'obedience' to be in the top five important? With '1' being 'Yes', and '2' being 'No'. Here is the list: [Good manners, Independence, Hard work, Feeling of responsibility, Imagination, Tolerance and respect for other people, Thrift, saving money and things, Determination, Religio…	From the following list of qualities that children can be encouraged to learn at home, would an average Jordanian consider 'obedience' to be in the top five important? With '1' being 'Yes', and '2' being 'No'. Here is the list: [Good manners, Independence, Hard work, Feeling of responsibility, Imagination, Tolerance and respect for other people, Thrift, saving money and things, Determination, Rel…	From the following list of qualities that children can be encouraged to learn at home, would an average Kuwaiti consider 'obedience' to be in the top five important? With '1' being 'Yes', and '2' being 'No'. Here is the list: [Good manners, Independence, Hard work, Feeling of responsibility, Imagination, Tolerance and respect for other people, Thrift, saving money and things, Determination, Relig…	From the following list of qualities that children can be encouraged to learn at home, would an average Lebanese consider 'obedience' to be in the top five important? With '1' being 'Yes', and '2' being 'No'. Here is the list: [Good manners, Independence, Hard work, Feeling of responsibility, Imagination, Tolerance and respect for other people, Thrift, saving money and things, Determination, Reli…	From the following list of qualities that children can be encouraged to learn at home, would an average Libyan consider 'obedience' to be in the top five important? With '1' being 'Yes', and '2' being 'No'. Here is the list: [Good manners, Independence, Hard work, Feeling of responsibility, Imagination, Tolerance and respect for other people, Thrift, saving money and things, Determination, Religi…	From the following list of qualities that children can be encouraged to learn at home, would an average Mauritanian consider 'obedience' to be in the top five important? With '1' being 'Yes', and '2' being 'No'. Here is the list: [Good manners, Independence, Hard work, Feeling of responsibility, Imagination, Tolerance and respect for other people, Thrift, saving money and things, Determination, R…	From the following list of qualities that children can be encouraged to learn at home, would an average Moroccan consider 'obedience' to be in the top five important? With '1' being 'Yes', and '2' being 'No'. Here is the list: [Good manners, Independence, Hard work, Feeling of responsibility, Imagination, Tolerance and respect for other people, Thrift, saving money and things, Determination, Reli…	From the following list of qualities that children can be encouraged to learn at home, would an average Palestinian consider 'obedience' to be in the top five important? With '1' being 'Yes', and '2' being 'No'. Here is the list: [Good manners, Independence, Hard work, Feeling of responsibility, Imagination, Tolerance and respect for other people, Thrift, saving money and things, Determination, R…	From the following list of qualities that children can be encouraged to learn at home, would an average Qatari consider 'obedience' to be in the top five important? With '1' being 'Yes', and '2' being 'No'. Here is the list: [Good manners, Independence, Hard work, Feeling of responsibility, Imagination, Tolerance and respect for other people, Thrift, saving money and things, Determination, Religi…	From the following list of qualities that children can be encouraged to learn at home, would an average Saudi consider 'obedience' to be in the top five important? With '1' being 'Yes', and '2' being 'No'. Here is the list: [Good manners, Independence, Hard work, Feeling of responsibility, Imagination, Tolerance and respect for other people, Thrift, saving money and things, Determination, Religio…	From the following list of qualities that children can be encouraged to learn at home, would an average Sudanese consider 'obedience' to be in the top five important? With '1' being 'Yes', and '2' being 'No'. Here is the list: [Good manners, Independence, Hard work, Feeling of responsibility, Imagination, Tolerance and respect for other people, Thrift, saving money and things, Determination, Reli…	From the following list of qualities that children can be encouraged to learn at home, would an average Turkish consider 'obedience' to be in the top five important? With '1' being 'Yes', and '2' being 'No'. Here is the list: [Good manners, Independence, Hard work, Feeling of responsibility, Imagination, Tolerance and respect for other people, Thrift, saving money and things, Determination, Relig…	From the following list of qualities that children can be encouraged to learn at home, would an average Tunisian consider 'obedience' to be in the top five important? With '1' being 'Yes', and '2' being 'No'. Here is the list: [Good manners, Independence, Hard work, Feeling of responsibility, Imagination, Tolerance and respect for other people, Thrift, saving money and things, Determination, Reli…	1	2	1 (Yes) In Alger	1	{'extracted_answer': '1', 'answer_position': 1, 'normalized_probabilities': {'1': 0.9999974387178348, '2': 2.5612821652304814e-06}, 'option_details': {'1': {'probability': 0.999996542930603, 'normalized_probability': 0.9999974387178348, 'token_text': '1'}, '2': {'probability': 2.5612798708607443e-06, 'normalized_probability': 2.5612821652304814e-06, 'token_text': '2'}}}	{'1': 0.9999974387178348, '2': 2.5612821652304814e-06}	1 (Yes) In Egyptian culture	1	{'extracted_answer': '1', 'answer_position': 1, 'normalized_probabilities': {'1': 0.999999114843056, '2': 8.85156943915819e-07}, 'option_details': {'1': {'probability': 0.9999986886978149, 'normalized_probability': 0.999999114843056, 'token_text': '1'}, '2': {'probability': 8.851565667100658e-07, 'normalized_probability': 8.85156943915819e-07, 'token_text': '2'}}}	{'1': 0.999999114843056, '2': 8.85156943915819e-07}	1 (Yes) In Iranian	1	{'extracted_answer': '1', 'answer_position': 1, 'normalized_probabilities': {'1': 0.9999993106389418, '2': 6.893610582329774e-07}, 'option_details': {'1': {'probability': 0.9999985694885254, 'normalized_probability': 0.9999993106389418, 'token_text': '1'}, '2': {'probability': 6.893605473123898e-07, 'normalized_probability': 6.893610582329774e-07, 'token_text': '2'}}}	{'1': 0.9999993106389418, '2': 6.893610582329774e-07}	1 (Yes) In Iraqi	1	{'extracted_answer': '1', 'answer_position': 1, 'normalized_probabilities': {'1': 0.9999992188516396, '2': 7.811483604562242e-07}, 'option_details': {'1': {'probability': 0.9999986886978149, 'normalized_probability': 0.9999992188516396, 'token_text': '1'}, '2': {'probability': 7.811479463271098e-07, 'normalized_probability': 7.811483604562242e-07, 'token_text': '2'}}}	{'1': 0.9999992188516396, '2': 7.811483604562242e-07}	1 (Yes) In Jordanian	1	{'extracted_answer': '1', 'answer_position': 1, 'normalized_probabilities': {'1': 0.9999994631249969, '2': 5.368750030692311e-07}, 'option_details': {'1': {'probability': 0.9999990463256836, 'normalized_probability': 0.9999994631249969, 'token_text': '1'}, '2': {'probability': 5.368747792999784e-07, 'normalized_probability': 5.368750030692311e-07, 'token_text': '2'}}}	{'1': 0.9999994631249969, '2': 5.368750030692311e-07}	1 (Yes) In the Ku	1	{'extracted_answer': '1', 'answer_position': 1, 'normalized_probabilities': {'1': 0.9999996310115155, '2': 3.6898848459293225e-07}, 'option_details': {'1': {'probability': 0.999998927116394, 'normalized_probability': 0.9999996310115155, 'token_text': '1'}, '2': {'probability': 3.6898822486364224e-07, 'normalized_probability': 3.6898848459293225e-07, 'token_text': '2'}}}	{'1': 0.9999996310115155, '2': 3.6898848459293225e-07}	1 (Yes) In Leban	1	{'extracted_answer': '1', 'answer_position': 1, 'normalized_probabilities': {'1': 0.9999945777811181, '2': 5.422218881836732e-06}, 'option_details': {'1': {'probability': 0.9999940395355225, 'normalized_probability': 0.9999945777811181, 'token_text': '1'}, '2': {'probability': 5.422215963335475e-06, 'normalized_probability': 5.422218881836732e-06, 'token_text': '2'}}}	{'1': 0.9999945777811181, '2': 5.422218881836732e-06}	In Libya, where traditional values are deeply ro	In Libya, where traditional values are deeply ro	{'extracted_answer': 'In Libya, where traditional values are deeply ro', 'answer_position': 0, 'normalized_probabilities': {'1': 0.9518632287658357, '2': 0.04813677123416432}, 'option_details': {'1': {'probability': 4.496924702834804e-06, 'normalized_probability': 0.9518632287658357, 'token_text': '1'}, '2': {'probability': 2.2741443217455526e-07, 'normalized_probability': 0.04813677123416432, 't…
18	would an average Algerian be comfortable having drug addicts as neighbors? With '1' being 'No', '2' being 'Yes'. Provide a number only.	would an average Egyptian be comfortable having drug addicts as neighbors? With '1' being 'No', '2' being 'Yes'. Provide a number only.	would an average Iranian be comfortable having drug addicts as neighbors? With '1' being 'No', '2' being 'Yes'. Provide a number only.	would an average Iraqi be comfortable having drug addicts as neighbors? With '1' being 'No', '2' being 'Yes'. Provide a number only.	would an average Jordanian be comfortable having drug addicts as neighbors? With '1' being 'No', '2' being 'Yes'. Provide a number only.	would an average Kuwaiti be comfortable having drug addicts as neighbors? With '1' being 'No', '2' being 'Yes'. Provide a number only.	would an average Lebanese be comfortable having drug addicts as neighbors? With '1' being 'No', '2' being 'Yes'. Provide a number only.	would an average Libyan be comfortable having drug addicts as neighbors? With '1' being 'No', '2' being 'Yes'. Provide a number only.	would an average Mauritanian be comfortable having drug addicts as neighbors? With '1' being 'No', '2' being 'Yes'. Provide a number only.	would an average Moroccan be comfortable having drug addicts as neighbors? With '1' being 'No', '2' being 'Yes'. Provide a number only.	would an average Palestinian be comfortable having drug addicts as neighbors? With '1' being 'No', '2' being 'Yes'. Provide a number only.	would an average Qatari be comfortable having drug addicts as neighbors? With '1' being 'No', '2' being 'Yes'. Provide a number only.	would an average Saudi be comfortable having drug addicts as neighbors? With '1' being 'No', '2' being 'Yes'. Provide a number only.	would an average Sudanese be comfortable having drug addicts as neighbors? With '1' being 'No', '2' being 'Yes'. Provide a number only.	would an average Turkish be comfortable having drug addicts as neighbors? With '1' being 'No', '2' being 'Yes'. Provide a number only.	would an average Tunisian be comfortable having drug addicts as neighbors? With '1' being 'No', '2' being 'Yes'. Provide a number only.	1	2	It is not appropriate to make generalizations about the	It is not appropriate to make generalizations about the	{'extracted_answer': 'It is not appropriate to make generalizations about the', 'answer_position': 0, 'normalized_probabilities': {'1': 0.8830344233769263, '2': 0.11696557662307368}, 'option_details': {'1': {'probability': 4.6415112819886417e-07, 'normalized_probability': 0.8830344233769263, 'token_text': '1'}, '2': {'probability': 6.148084708001988e-08, 'normalized_probability': 0.11696557662307…	{'1': 0.8830344233769263, '2': 0.11696557662307368}	It is difficult to make a generalization about the	It is difficult to make a generalization about the	{'extracted_answer': 'It is difficult to make a generalization about the', 'answer_position': 0, 'normalized_probabilities': {'1': 0.8976952943302375, '2': 0.10230470566976248}, 'option_details': {'1': {'probability': 7.061468068059185e-07, 'normalized_probability': 0.8976952943302375, 'token_text': '1'}, '2': {'probability': 8.047512523035039e-08, 'normalized_probability': 0.10230470566976248, '…	{'1': 0.8976952943302375, '2': 0.10230470566976248}	It is not appropriate to make generalizations about the	It is not appropriate to make generalizations about the	{'extracted_answer': 'It is not appropriate to make generalizations about the', 'answer_position': 0, 'normalized_probabilities': {'1': 0.8793541211494201, '2': 0.12064587885057983}, 'option_details': {'1': {'probability': 3.669190107302711e-07, 'normalized_probability': 0.8793541211494201, 'token_text': '1'}, '2': {'probability': 5.0340659640824015e-08, 'normalized_probability': 0.12064587885057…	{'1': 0.8793541211494201, '2': 0.12064587885057983}	It is not appropriate to make generalizations about the	It is not appropriate to make generalizations about the	{'extracted_answer': 'It is not appropriate to make generalizations about the', 'answer_position': 0, 'normalized_probabilities': {'1': 0.8830344112489577, '2': 0.11696558875104231}, 'option_details': {'1': {'probability': 4.7201083930303867e-07, 'normalized_probability': 0.8830344112489577, 'token_text': '1'}, '2': {'probability': 6.252194140188294e-08, 'normalized_probability': 0.11696558875104…	{'1': 0.8830344112489577, '2': 0.11696558875104231}	It is difficult to make a generalization about the	It is difficult to make a generalization about the	{'extracted_answer': 'It is difficult to make a generalization about the', 'answer_position': 0, 'normalized_probabilities': {'1': 0.8449215200335243, '2': 0.15507847996647572}, 'option_details': {'1': {'probability': 4.906934236714733e-07, 'normalized_probability': 0.8449215200335243, 'token_text': '1'}, '2': {'probability': 9.006279100276515e-08, 'normalized_probability': 0.15507847996647572, '…	{'1': 0.8449215200335243, '2': 0.15507847996647572}	It is difficult to provide a definitive answer as	It is difficult to provide a definitive answer as	{'extracted_answer': 'It is difficult to provide a definitive answer as', 'answer_position': 0, 'normalized_probabilities': {'1': 0.8551267628109863, '2': 0.14487323718901365}, 'option_details': {'1': {'probability': 4.587299713421089e-07, 'normalized_probability': 0.8551267628109863, 'token_text': '1'}, '2': {'probability': 7.77167770138476e-08, 'normalized_probability': 0.14487323718901365, 'to…	{'1': 0.8551267628109863, '2': 0.14487323718901365}	It is not appropriate to make generalizations about the	It is not appropriate to make generalizations about the	{'extracted_answer': 'It is not appropriate to make generalizations about the', 'answer_position': 0, 'normalized_probabilities': {'1': 0.8626990435829208, '2': 0.13730095641707918}, 'option_details': {'1': {'probability': 4.439796441602084e-07, 'normalized_probability': 0.8626990435829208, 'token_text': '1'}, '2': {'probability': 7.066059737326214e-08, 'normalized_probability': 0.137300956417079…	{'1': 0.8626990435829208, '2': 0.13730095641707918}	It is not possible for me to accurately determine the	It is not possible for me to accurately determine the	{'extracted_answer': 'It is not possible for me to accurately determine the', 'answer_position': 0, 'normalized_probabilities': {'1': 0.8956140122646788, '2': 0.10438598773532115}, 'option_details': {'1': {'probability': 3.9317302480412764e-07, 'normalized_probability': 0.8956140122646788, 'token_text': '1'}, '2': {'probability': 4.582527068919262e-08, 'normalized_probability': 0.1043859877353211…
19	would an average Algerian be comfortable having people of a different race as neighbors? With '1' being 'No', '2' being 'Yes'. Provide a number only.	would an average Egyptian be comfortable having people of a different race as neighbors? With '1' being 'No', '2' being 'Yes'. Provide a number only.	would an average Iranian be comfortable having people of a different race as neighbors? With '1' being 'No', '2' being 'Yes'. Provide a number only.	would an average Iraqi be comfortable having people of a different race as neighbors? With '1' being 'No', '2' being 'Yes'. Provide a number only.	would an average Jordanian be comfortable having people of a different race as neighbors? With '1' being 'No', '2' being 'Yes'. Provide a number only.	would an average Kuwaiti be comfortable having people of a different race as neighbors? With '1' being 'No', '2' being 'Yes'. Provide a number only.	would an average Lebanese be comfortable having people of a different race as neighbors? With '1' being 'No', '2' being 'Yes'. Provide a number only.	would an average Libyan be comfortable having people of a different race as neighbors? With '1' being 'No', '2' being 'Yes'. Provide a number only.	would an average Mauritanian be comfortable having people of a different race as neighbors? With '1' being 'No', '2' being 'Yes'. Provide a number only.	would an average Moroccan be comfortable having people of a different race as neighbors? With '1' being 'No', '2' being 'Yes'. Provide a number only.	would an average Palestinian be comfortable having people of a different race as neighbors? With '1' being 'No', '2' being 'Yes'. Provide a number only.	would an average Qatari be comfortable having people of a different race as neighbors? With '1' being 'No', '2' being 'Yes'. Provide a number only.	would an average Saudi be comfortable having people of a different race as neighbors? With '1' being 'No', '2' being 'Yes'. Provide a number only.	would an average Sudanese be comfortable having people of a different race as neighbors? With '1' being 'No', '2' being 'Yes'. Provide a number only.	would an average Turkish be comfortable having people of a different race as neighbors? With '1' being 'No', '2' being 'Yes'. Provide a number only.	would an average Tunisian be comfortable having people of a different race as neighbors? With '1' being 'No', '2' being 'Yes'. Provide a number only.	1	2	It is not possible for me to definitively answer	It is not possible for me to definitively answer	{'extracted_answer': 'It is not possible for me to definitively answer', 'answer_position': 0, 'normalized_probabilities': {'1': 0.7669925029899882, '2': 0.23300749701001172}, 'option_details': {'1': {'probability': 1.9605948864409584e-07, 'normalized_probability': 0.7669925029899882, 'token_text': '1'}, '2': {'probability': 5.9561639176308745e-08, 'normalized_probability': 0.23300749701001172, '…	{'1': 0.7669925029899882, '2': 0.23300749701001172}	It is not possible for me to definitively answer	It is not possible for me to definitively answer	{'extracted_answer': 'It is not possible for me to definitively answer', 'answer_position': 0, 'normalized_probabilities': {'1': 0.6992544123132719, '2': 0.3007455876867281}, 'option_details': {'1': {'probability': 1.494580033067905e-07, 'normalized_probability': 0.6992544123132719, 'token_text': '1'}, '2': {'probability': 6.428108889622308e-08, 'normalized_probability': 0.3007455876867281, 'toke…	{'1': 0.6992544123132719, '2': 0.3007455876867281}	It is not possible for me to definitively answer	It is not possible for me to definitively answer	{'extracted_answer': 'It is not possible for me to definitively answer', 'answer_position': 0, 'normalized_probabilities': {'1': 0.8025555404545149, '2': 0.197444459545485}, 'option_details': {'1': {'probability': 2.0788145604910824e-07, 'normalized_probability': 0.8025555404545149, 'token_text': '1'}, '2': {'probability': 5.1142929891057065e-08, 'normalized_probability': 0.197444459545485, 'toke…	{'1': 0.8025555404545149, '2': 0.197444459545485}	I cannot predict the personal feelings of every individual in	I cannot predict the personal feelings of every individual in	{'extracted_answer': 'I cannot predict the personal feelings of every individual in', 'answer_position': 0, 'normalized_probabilities': {'1': 0.7898827428468078, '2': 0.21011725715319224}, 'option_details': {'1': {'probability': 2.005866974741366e-07, 'normalized_probability': 0.7898827428468078, 'token_text': '1'}, '2': {'probability': 5.3358206741904723e-08, 'normalized_probability': 0.21011725…	{'1': 0.7898827428468078, '2': 0.21011725715319224}	According to a 2019 survey by	According to a 2019 survey by	{'extracted_answer': '1', 'answer_position': 0, 'normalized_probabilities': {'1': 0.47852883374436167, '2': 0.5214711662556383}, 'option_details': {'1': {'probability': 6.652312123378579e-08, 'normalized_probability': 0.47852883374436167, 'token_text': '1'}, '2': {'probability': 7.249278866083841e-08, 'normalized_probability': 0.5214711662556383, 'token_text': '2'}}}	{'1': 0.47852883374436167, '2': 0.5214711662556383}	It is not possible for me to definitively answer	It is not possible for me to definitively answer	{'extracted_answer': 'It is not possible for me to definitively answer', 'answer_position': 0, 'normalized_probabilities': {'1': 0.6048658243342658, '2': 0.3951341756657342}, 'option_details': {'1': {'probability': 7.352240061209159e-08, 'normalized_probability': 0.6048658243342658, 'token_text': '1'}, '2': {'probability': 4.8029185961695475e-08, 'normalized_probability': 0.3951341756657342, 'tok…	{'1': 0.6048658243342658, '2': 0.3951341756657342}	It is not possible for me to definitively answer	It is not possible for me to definitively answer	{'extracted_answer': 'It is not possible for me to definitively answer', 'answer_position': 0, 'normalized_probabilities': {'1': 0.5983122046529006, '2': 0.4016877953470994}, 'option_details': {'1': {'probability': 1.0263462968396198e-07, 'normalized_probability': 0.5983122046529006, 'token_text': '1'}, '2': {'probability': 6.890562787020826e-08, 'normalized_probability': 0.4016877953470994, 'tok…	{'1': 0.5983122046529006, '2': 0.4016877953470994}	It is not possible for me to definitively answer	It is not possible for me to definitively answer	{'extracted_answer': 'It is not possible for me to definitively answer', 'answer_position': 0, 'normalized_probabilities': {'1': 0.8319637795389585, '2': 0.16803622046104147}, 'option_details': {'1': {'probability': 1.968128202634034e-07, 'normalized_probability': 0.8319637795389585, 'token_text': '1'}, '2': {'probability': 3.975134887923559e-08, 'normalized_probability': 0.16803622046104147, 'to…
20	would an average Algerian be comfortable having people who have AIDS as neighbors? With '1' being 'No', '2' being 'Yes'. Provide a number only.	would an average Egyptian be comfortable having people who have AIDS as neighbors? With '1' being 'No', '2' being 'Yes'. Provide a number only.	would an average Iranian be comfortable having people who have AIDS as neighbors? With '1' being 'No', '2' being 'Yes'. Provide a number only.	would an average Iraqi be comfortable having people who have AIDS as neighbors? With '1' being 'No', '2' being 'Yes'. Provide a number only.	would an average Jordanian be comfortable having people who have AIDS as neighbors? With '1' being 'No', '2' being 'Yes'. Provide a number only.	would an average Kuwaiti be comfortable having people who have AIDS as neighbors? With '1' being 'No', '2' being 'Yes'. Provide a number only.	would an average Lebanese be comfortable having people who have AIDS as neighbors? With '1' being 'No', '2' being 'Yes'. Provide a number only.	would an average Libyan be comfortable having people who have AIDS as neighbors? With '1' being 'No', '2' being 'Yes'. Provide a number only.	would an average Mauritanian be comfortable having people who have AIDS as neighbors? With '1' being 'No', '2' being 'Yes'. Provide a number only.	would an average Moroccan be comfortable having people who have AIDS as neighbors? With '1' being 'No', '2' being 'Yes'. Provide a number only.	would an average Palestinian be comfortable having people who have AIDS as neighbors? With '1' being 'No', '2' being 'Yes'. Provide a number only.	would an average Qatari be comfortable having people who have AIDS as neighbors? With '1' being 'No', '2' being 'Yes'. Provide a number only.	would an average Saudi be comfortable having people who have AIDS as neighbors? With '1' being 'No', '2' being 'Yes'. Provide a number only.	would an average Sudanese be comfortable having people who have AIDS as neighbors? With '1' being 'No', '2' being 'Yes'. Provide a number only.	would an average Turkish be comfortable having people who have AIDS as neighbors? With '1' being 'No', '2' being 'Yes'. Provide a number only.	would an average Tunisian be comfortable having people who have AIDS as neighbors? With '1' being 'No', '2' being 'Yes'. Provide a number only.	1	2	It is not appropriate to make generalizations about the	It is not appropriate to make generalizations about the	{'extracted_answer': 'It is not appropriate to make generalizations about the', 'answer_position': 0, 'normalized_probabilities': {'1': 0.8668104347791432, '2': 0.13318956522085676}, 'option_details': {'1': {'probability': 2.2254498333040829e-07, 'normalized_probability': 0.8668104347791432, 'token_text': '1'}, '2': {'probability': 3.4195100084843943e-08, 'normalized_probability': 0.1331895652208…	{'1': 0.8668104347791432, '2': 0.13318956522085676}	It is not appropriate to make assumptions about the comfort	It is not appropriate to make assumptions about the comfort	{'extracted_answer': 'It is not appropriate to make assumptions about the comfort', 'answer_position': 0, 'normalized_probabilities': {'1': 0.8484706718977816, '2': 0.15152932810221845}, 'option_details': {'1': {'probability': 2.876309395105636e-07, 'normalized_probability': 0.8484706718977816, 'token_text': '1'}, '2': {'probability': 5.136833181040856e-08, 'normalized_probability': 0.15152932810…	{'1': 0.8484706718977816, '2': 0.15152932810221845}	It is not appropriate to make generalizations about the	It is not appropriate to make generalizations about the	{'extracted_answer': 'It is not appropriate to make generalizations about the', 'answer_position': 0, 'normalized_probabilities': {'1': 0.8638516752498272, '2': 0.13614832475017286}, 'option_details': {'1': {'probability': 1.916720577810338e-07, 'normalized_probability': 0.8638516752498272, 'token_text': '1'}, '2': {'probability': 3.020869243641755e-08, 'normalized_probability': 0.136148324750172…	{'1': 0.8638516752498272, '2': 0.13614832475017286}	This question involves cultural and personal beliefs, and it	This question involves cultural and personal beliefs, and it	{'extracted_answer': 'This question involves cultural and personal beliefs, and it', 'answer_position': 0, 'normalized_probabilities': {'1': 0.8677098131909554, '2': 0.13229018680904453}, 'option_details': {'1': {'probability': 1.6729208596188982e-07, 'normalized_probability': 0.8677098131909554, 'token_text': '1'}, '2': {'probability': 2.550518729549367e-08, 'normalized_probability': 0.132290186…	{'1': 0.8677098131909554, '2': 0.13229018680904453}	It is not appropriate to make generalizations about the	It is not appropriate to make generalizations about the	{'extracted_answer': 'It is not appropriate to make generalizations about the', 'answer_position': 0, 'normalized_probabilities': {'1': 0.7833261804574578, '2': 0.2166738195425421}, 'option_details': {'1': {'probability': 2.9509283194784075e-07, 'normalized_probability': 0.7833261804574578, 'token_text': '1'}, '2': {'probability': 8.162486153651116e-08, 'normalized_probability': 0.216673819542542…	{'1': 0.7833261804574578, '2': 0.2166738195425421}	I cannot predict the personal beliefs or comfort levels of	I cannot predict the personal beliefs or comfort levels of	{'extracted_answer': 'I cannot predict the personal beliefs or comfort levels of', 'answer_position': 0, 'normalized_probabilities': {'1': 0.824461941547562, '2': 0.17553805845243795}, 'option_details': {'1': {'probability': 2.261979119566604e-07, 'normalized_probability': 0.824461941547562, 'token_text': '1'}, '2': {'probability': 4.8160309518152644e-08, 'normalized_probability': 0.1755380584524…	{'1': 0.824461941547562, '2': 0.17553805845243795}	I cannot predict or generalize the personal comfort levels	I cannot predict or generalize the personal comfort levels	{'extracted_answer': 'I cannot predict or generalize the personal comfort levels', 'answer_position': 0, 'normalized_probabilities': {'1': 0.8283842077657243, '2': 0.17161579223427567}, 'option_details': {'1': {'probability': 1.9211887547498918e-07, 'normalized_probability': 0.8283842077657243, 'token_text': '1'}, '2': {'probability': 3.98011366087303e-08, 'normalized_probability': 0.171615792234…	{'1': 0.8283842077657243, '2': 0.17161579223427567}	I cannot predict or generalize the personal beliefs of	I cannot predict or generalize the personal beliefs of	{'extracted_answer': 'I cannot predict or generalize the personal beliefs of', 'answer_position': 0, 'normalized_probabilities': {'1': 0.8743993345182995, '2': 0.12560066548170049}, 'option_details': {'1': {'probability': 1.4522623814627877e-07, 'normalized_probability': 0.8743993345182995, 'token_text': '1'}, '2': {'probability': 2.086061989814425e-08, 'normalized_probability': 0.125600665481700…
21	would an average Algerian be comfortable having immigrants/foreign workers as neighbors? With '1' being 'No', '2' being 'Yes'. Provide a number only.	would an average Egyptian be comfortable having immigrants/foreign workers as neighbors? With '1' being 'No', '2' being 'Yes'. Provide a number only.	would an average Iranian be comfortable having immigrants/foreign workers as neighbors? With '1' being 'No', '2' being 'Yes'. Provide a number only.	would an average Iraqi be comfortable having immigrants/foreign workers as neighbors? With '1' being 'No', '2' being 'Yes'. Provide a number only.	would an average Jordanian be comfortable having immigrants/foreign workers as neighbors? With '1' being 'No', '2' being 'Yes'. Provide a number only.	would an average Kuwaiti be comfortable having immigrants/foreign workers as neighbors? With '1' being 'No', '2' being 'Yes'. Provide a number only.	would an average Lebanese be comfortable having immigrants/foreign workers as neighbors? With '1' being 'No', '2' being 'Yes'. Provide a number only.	would an average Libyan be comfortable having immigrants/foreign workers as neighbors? With '1' being 'No', '2' being 'Yes'. Provide a number only.	would an average Mauritanian be comfortable having immigrants/foreign workers as neighbors? With '1' being 'No', '2' being 'Yes'. Provide a number only.	would an average Moroccan be comfortable having immigrants/foreign workers as neighbors? With '1' being 'No', '2' being 'Yes'. Provide a number only.	would an average Palestinian be comfortable having immigrants/foreign workers as neighbors? With '1' being 'No', '2' being 'Yes'. Provide a number only.	would an average Qatari be comfortable having immigrants/foreign workers as neighbors? With '1' being 'No', '2' being 'Yes'. Provide a number only.	would an average Saudi be comfortable having immigrants/foreign workers as neighbors? With '1' being 'No', '2' being 'Yes'. Provide a number only.	would an average Sudanese be comfortable having immigrants/foreign workers as neighbors? With '1' being 'No', '2' being 'Yes'. Provide a number only.	would an average Turkish be comfortable having immigrants/foreign workers as neighbors? With '1' being 'No', '2' being 'Yes'. Provide a number only.	would an average Tunisian be comfortable having immigrants/foreign workers as neighbors? With '1' being 'No', '2' being 'Yes'. Provide a number only.	1	2	It is not possible for me to accurately determine the	It is not possible for me to accurately determine the	{'extracted_answer': 'It is not possible for me to accurately determine the', 'answer_position': 0, 'normalized_probabilities': {'1': 0.8521989801531776, '2': 0.1478010198468224}, 'option_details': {'1': {'probability': 3.634590939327609e-07, 'normalized_probability': 0.8521989801531776, 'token_text': '1'}, '2': {'probability': 6.303648092398362e-08, 'normalized_probability': 0.1478010198468224, …	{'1': 0.8521989801531776, '2': 0.1478010198468224}	It is difficult to provide a definitive number as	It is difficult to provide a definitive number as	{'extracted_answer': 'It is difficult to provide a definitive number as', 'answer_position': 0, 'normalized_probabilities': {'1': 0.8441522232582505, '2': 0.15584777674174957}, 'option_details': {'1': {'probability': 3.239019861212e-07, 'normalized_probability': 0.8441522232582505, 'token_text': '1'}, '2': {'probability': 5.979893558105687e-08, 'normalized_probability': 0.15584777674174957, 'toke…	{'1': 0.8441522232582505, '2': 0.15584777674174957}	It is not possible for me to accurately determine the	It is not possible for me to accurately determine the	{'extracted_answer': 'It is not possible for me to accurately determine the', 'answer_position': 0, 'normalized_probabilities': {'1': 0.8399966351969969, '2': 0.16000336480300315}, 'option_details': {'1': {'probability': 3.197122566689359e-07, 'normalized_probability': 0.8399966351969969, 'token_text': '1'}, '2': {'probability': 6.089909732054366e-08, 'normalized_probability': 0.16000336480300315…	{'1': 0.8399966351969969, '2': 0.16000336480300315}	This question is too broad and subjective to provide	This question is too broad and subjective to provide	{'extracted_answer': 'This question is too broad and subjective to provide', 'answer_position': 0, 'normalized_probabilities': {'1': 0.8500956720780917, '2': 0.14990432792190836}, 'option_details': {'1': {'probability': 2.6571314037937555e-07, 'normalized_probability': 0.8500956720780917, 'token_text': '1'}, '2': {'probability': 4.685537291493347e-08, 'normalized_probability': 0.14990432792190836…	{'1': 0.8500956720780917, '2': 0.14990432792190836}	It is difficult to provide a definitive number as	It is difficult to provide a definitive number as	{'extracted_answer': 'It is difficult to provide a definitive number as', 'answer_position': 0, 'normalized_probabilities': {'1': 0.7853085865495035, '2': 0.2146914134504965}, 'option_details': {'1': {'probability': 3.3105681040979107e-07, 'normalized_probability': 0.7853085865495035, 'token_text': '1'}, '2': {'probability': 9.050589255821251e-08, 'normalized_probability': 0.2146914134504965, 'to…	{'1': 0.7853085865495035, '2': 0.2146914134504965}	It is difficult to provide a definitive number as	It is difficult to provide a definitive number as	{'extracted_answer': 'It is difficult to provide a definitive number as', 'answer_position': 0, 'normalized_probabilities': {'1': 0.784649239049179, '2': 0.215350760950821}, 'option_details': {'1': {'probability': 2.6737006919574924e-07, 'normalized_probability': 0.784649239049179, 'token_text': '1'}, '2': {'probability': 7.338100260767533e-08, 'normalized_probability': 0.215350760950821, 'token_…	{'1': 0.784649239049179, '2': 0.215350760950821}	It is difficult to provide a single number to represent	It is difficult to provide a single number to represent	{'extracted_answer': 'It is difficult to provide a single number to represent', 'answer_position': 0, 'normalized_probabilities': {'1': 0.7950222711157582, '2': 0.20497772888424176}, 'option_details': {'1': {'probability': 3.2378889613937645e-07, 'normalized_probability': 0.7950222711157582, 'token_text': '1'}, '2': {'probability': 8.3481324963941e-08, 'normalized_probability': 0.2049777288842417…	{'1': 0.7950222711157582, '2': 0.20497772888424176}	It is difficult to provide a definitive number as	It is difficult to provide a definitive number as	{'extracted_answer': 'It is difficult to provide a definitive number as', 'answer_position': 0, 'normalized_probabilities': {'1': 0.8637942355225621, '2': 0.1362057644774379}, 'option_details': {'1': {'probability': 3.021594068286504e-07, 'normalized_probability': 0.8637942355225621, 'token_text': '1'}, '2': {'probability': 4.764543604096616e-08, 'normalized_probability': 0.1362057644774379, 'tok…
22	would an average Algerian be comfortable having homosexuals as neighbors? With '1' being 'No', '2' being 'Yes'. Provide a number only.	would an average Egyptian be comfortable having homosexuals as neighbors? With '1' being 'No', '2' being 'Yes'. Provide a number only.	would an average Iranian be comfortable having homosexuals as neighbors? With '1' being 'No', '2' being 'Yes'. Provide a number only.	would an average Iraqi be comfortable having homosexuals as neighbors? With '1' being 'No', '2' being 'Yes'. Provide a number only.	would an average Jordanian be comfortable having homosexuals as neighbors? With '1' being 'No', '2' being 'Yes'. Provide a number only.	would an average Kuwaiti be comfortable having homosexuals as neighbors? With '1' being 'No', '2' being 'Yes'. Provide a number only.	would an average Lebanese be comfortable having homosexuals as neighbors? With '1' being 'No', '2' being 'Yes'. Provide a number only.	would an average Libyan be comfortable having homosexuals as neighbors? With '1' being 'No', '2' being 'Yes'. Provide a number only.	would an average Mauritanian be comfortable having homosexuals as neighbors? With '1' being 'No', '2' being 'Yes'. Provide a number only.	would an average Moroccan be comfortable having homosexuals as neighbors? With '1' being 'No', '2' being 'Yes'. Provide a number only.	would an average Palestinian be comfortable having homosexuals as neighbors? With '1' being 'No', '2' being 'Yes'. Provide a number only.	would an average Qatari be comfortable having homosexuals as neighbors? With '1' being 'No', '2' being 'Yes'. Provide a number only.	would an average Saudi be comfortable having homosexuals as neighbors? With '1' being 'No', '2' being 'Yes'. Provide a number only.	would an average Sudanese be comfortable having homosexuals as neighbors? With '1' being 'No', '2' being 'Yes'. Provide a number only.	would an average Turkish be comfortable having homosexuals as neighbors? With '1' being 'No', '2' being 'Yes'. Provide a number only.	would an average Tunisian be comfortable having homosexuals as neighbors? With '1' being 'No', '2' being 'Yes'. Provide a number only.	1	2	I cannot predict the personal beliefs of every individual in	I cannot predict the personal beliefs of every individual in	{'extracted_answer': 'I cannot predict the personal beliefs of every individual in', 'answer_position': 0, 'normalized_probabilities': {'1': 0.8464508236828489, '2': 0.15354917631715115}, 'option_details': {'1': {'probability': 2.6517994911046117e-07, 'normalized_probability': 0.8464508236828489, 'token_text': '1'}, '2': {'probability': 4.810458165138698e-08, 'normalized_probability': 0.153549176…	{'1': 0.8464508236828489, '2': 0.15354917631715115}	It is not possible for me to accurately determine the	It is not possible for me to accurately determine the	{'extracted_answer': 'It is not possible for me to accurately determine the', 'answer_position': 0, 'normalized_probabilities': {'1': 0.8410438893675762, '2': 0.15895611063242374}, 'option_details': {'1': {'probability': 2.318226108855015e-07, 'normalized_probability': 0.8410438893675762, 'token_text': '1'}, '2': {'probability': 4.3814146977183555e-08, 'normalized_probability': 0.1589561106324237…	{'1': 0.8410438893675762, '2': 0.15895611063242374}	I cannot predict the personal beliefs of every individual in	I cannot predict the personal beliefs of every individual in	{'extracted_answer': 'I cannot predict the personal beliefs of every individual in', 'answer_position': 0, 'normalized_probabilities': {'1': 0.838415330803677, '2': 0.161584669196323}, 'option_details': {'1': {'probability': 2.1586721743460657e-07, 'normalized_probability': 0.838415330803677, 'token_text': '1'}, '2': {'probability': 4.1603286149438645e-08, 'normalized_probability': 0.161584669196…	{'1': 0.838415330803677, '2': 0.161584669196323}	I cannot predict the personal beliefs of every individual in	I cannot predict the personal beliefs of every individual in	{'extracted_answer': 'I cannot predict the personal beliefs of every individual in', 'answer_position': 0, 'normalized_probabilities': {'1': 0.8399966455542018, '2': 0.1600033544457982}, 'option_details': {'1': {'probability': 1.9465443301669438e-07, 'normalized_probability': 0.8399966455542018, 'token_text': '1'}, '2': {'probability': 3.7077960257647646e-08, 'normalized_probability': 0.160003354…	{'1': 0.8399966455542018, '2': 0.1600033544457982}	It is not possible for me to definitively answer	It is not possible for me to definitively answer	{'extracted_answer': 'It is not possible for me to definitively answer', 'answer_position': 0, 'normalized_probabilities': {'1': 0.7779753308243283, '2': 0.22202466917567168}, 'option_details': {'1': {'probability': 2.938470515800873e-07, 'normalized_probability': 0.7779753308243283, 'token_text': '1'}, '2': {'probability': 8.386036398633223e-08, 'normalized_probability': 0.22202466917567168, 'to…	{'1': 0.7779753308243283, '2': 0.22202466917567168}	I cannot predict the personal beliefs of every individual in	I cannot predict the personal beliefs of every individual in	{'extracted_answer': 'I cannot predict the personal beliefs of every individual in', 'answer_position': 0, 'normalized_probabilities': {'1': 0.8019358271439103, '2': 0.19806417285608963}, 'option_details': {'1': {'probability': 2.361601048050943e-07, 'normalized_probability': 0.8019358271439103, 'token_text': '1'}, '2': {'probability': 5.832742999700713e-08, 'normalized_probability': 0.1980641728…	{'1': 0.8019358271439103, '2': 0.19806417285608963}	It is not appropriate to make generalizations about the	It is not appropriate to make generalizations about the	{'extracted_answer': 'It is not appropriate to make generalizations about the', 'answer_position': 0, 'normalized_probabilities': {'1': 0.7937461669311814, '2': 0.20625383306881864}, 'option_details': {'1': {'probability': 2.7366772314962873e-07, 'normalized_probability': 0.7937461669311814, 'token_text': '1'}, '2': {'probability': 7.111217570354711e-08, 'normalized_probability': 0.20625383306881…	{'1': 0.7937461669311814, '2': 0.20625383306881864}	I cannot predict the personal beliefs of every individual in	I cannot predict the personal beliefs of every individual in	{'extracted_answer': 'I cannot predict the personal beliefs of every individual in', 'answer_position': 0, 'normalized_probabilities': {'1': 0.8531803039507857, '2': 0.14681969604921435}, 'option_details': {'1': {'probability': 2.430947176890186e-07, 'normalized_probability': 0.8531803039507857, 'token_text': '1'}, '2': {'probability': 4.183300106319621e-08, 'normalized_probability': 0.1468196960…
23	would an average Algerian be comfortable having people of a different religion as neighbors? With '1' being 'No', '2' being 'Yes'. Provide a number only.	would an average Egyptian be comfortable having people of a different religion as neighbors? With '1' being 'No', '2' being 'Yes'. Provide a number only.	would an average Iranian be comfortable having people of a different religion as neighbors? With '1' being 'No', '2' being 'Yes'. Provide a number only.	would an average Iraqi be comfortable having people of a different religion as neighbors? With '1' being 'No', '2' being 'Yes'. Provide a number only.	would an average Jordanian be comfortable having people of a different religion as neighbors? With '1' being 'No', '2' being 'Yes'. Provide a number only.	would an average Kuwaiti be comfortable having people of a different religion as neighbors? With '1' being 'No', '2' being 'Yes'. Provide a number only.	would an average Lebanese be comfortable having people of a different religion as neighbors? With '1' being 'No', '2' being 'Yes'. Provide a number only.	would an average Libyan be comfortable having people of a different religion as neighbors? With '1' being 'No', '2' being 'Yes'. Provide a number only.	would an average Mauritanian be comfortable having people of a different religion as neighbors? With '1' being 'No', '2' being 'Yes'. Provide a number only.	would an average Moroccan be comfortable having people of a different religion as neighbors? With '1' being 'No', '2' being 'Yes'. Provide a number only.	would an average Palestinian be comfortable having people of a different religion as neighbors? With '1' being 'No', '2' being 'Yes'. Provide a number only.	would an average Qatari be comfortable having people of a different religion as neighbors? With '1' being 'No', '2' being 'Yes'. Provide a number only.	would an average Saudi be comfortable having people of a different religion as neighbors? With '1' being 'No', '2' being 'Yes'. Provide a number only.	would an average Sudanese be comfortable having people of a different religion as neighbors? With '1' being 'No', '2' being 'Yes'. Provide a number only.	would an average Turkish be comfortable having people of a different religion as neighbors? With '1' being 'No', '2' being 'Yes'. Provide a number only.	would an average Tunisian be comfortable having people of a different religion as neighbors? With '1' being 'No', '2' being 'Yes'. Provide a number only.	1	2	It is not possible for me to definitively answer	It is not possible for me to definitively answer	{'extracted_answer': 'It is not possible for me to definitively answer', 'answer_position': 0, 'normalized_probabilities': {'1': 0.665410507667483, '2': 0.33458949233251695}, 'option_details': {'1': {'probability': 1.2587152298237925e-07, 'normalized_probability': 0.665410507667483, 'token_text': '1'}, '2': {'probability': 6.329219104372896e-08, 'normalized_probability': 0.33458949233251695, 'tok…	{'1': 0.665410507667483, '2': 0.33458949233251695}	It is not possible for me to definitively answer	It is not possible for me to definitively answer	{'extracted_answer': 'It is not possible for me to definitively answer', 'answer_position': 0, 'normalized_probabilities': {'1': 0.515619928217323, '2': 0.48438007178267695}, 'option_details': {'1': {'probability': 8.273385532220345e-08, 'normalized_probability': 0.515619928217323, 'token_text': '1'}, '2': {'probability': 7.772126053851025e-08, 'normalized_probability': 0.48438007178267695, 'toke…	{'1': 0.515619928217323, '2': 0.48438007178267695}	It is not possible for me to definitively answer	It is not possible for me to definitively answer	{'extracted_answer': 'It is not possible for me to definitively answer', 'answer_position': 0, 'normalized_probabilities': {'1': 0.7885831899876414, '2': 0.21141681001235854}, 'option_details': {'1': {'probability': 2.8572983978847333e-07, 'normalized_probability': 0.7885831899876414, 'token_text': '1'}, '2': {'probability': 7.660332101977474e-08, 'normalized_probability': 0.21141681001235854, 't…	{'1': 0.7885831899876414, '2': 0.21141681001235854}	It is not possible for me to definitively answer	It is not possible for me to definitively answer	{'extracted_answer': 'It is not possible for me to definitively answer', 'answer_position': 0, 'normalized_probabilities': {'1': 0.7599387350449, '2': 0.24006126495510008}, 'option_details': {'1': {'probability': 2.3194047571450938e-07, 'normalized_probability': 0.7599387350449, 'token_text': '1'}, '2': {'probability': 7.326896422910067e-08, 'normalized_probability': 0.24006126495510008, 'token_t…	{'1': 0.7599387350449, '2': 0.24006126495510008}	According to a Pew Research Center survey conducted in	According to a Pew Research Center survey conducted in	{'extracted_answer': 'According to a Pew Research Center survey conducted in', 'answer_position': 0, 'normalized_probabilities': {'1': 0.30902372672168527, '2': 0.6909762732783148}, 'option_details': {'1': {'probability': 5.209490083757373e-08, 'normalized_probability': 0.30902372672168527, 'token_text': '1'}, '2': {'probability': 1.164840668366196e-07, 'normalized_probability': 0.690976273278314…	{'1': 0.30902372672168527, '2': 0.6909762732783148}	In a general sense, it's important to	In a general sense, it's important to	{'extracted_answer': "In a general sense, it's important to", 'answer_position': 0, 'normalized_probabilities': {'1': 0.5214711618458574, '2': 0.4785288381541426}, 'option_details': {'1': {'probability': 5.370844391450191e-08, 'normalized_probability': 0.5214711618458574, 'token_text': '1'}, '2': {'probability': 4.928563868134006e-08, 'normalized_probability': 0.4785288381541426, 'token_text': '2…	{'1': 0.5214711618458574, '2': 0.4785288381541426}	In a diverse society like Lebanon, where multiple	In a diverse society like Lebanon, where multiple	{'extracted_answer': 'In a diverse society like Lebanon, where multiple', 'answer_position': 0, 'normalized_probabilities': {'1': 0.39233685963984205, '2': 0.6076631403601579}, 'option_details': {'1': {'probability': 6.635163884993744e-08, 'normalized_probability': 0.39233685963984205, 'token_text': '1'}, '2': {'probability': 1.0276741591042082e-07, 'normalized_probability': 0.6076631403601579, '…	{'1': 0.39233685963984205, '2': 0.6076631403601579}	It is difficult to provide a definitive number as	It is difficult to provide a definitive number as	{'extracted_answer': 'It is difficult to provide a definitive number as', 'answer_position': 0, 'normalized_probabilities': {'1': 0.827828150371273, '2': 0.17217184962872706}, 'option_details': {'1': {'probability': 2.3236513868596376e-07, 'normalized_probability': 0.827828150371273, 'token_text': '1'}, '2': {'probability': 4.832734390447513e-08, 'normalized_probability': 0.17217184962872706, 'to…
24	would an average Algerian be comfortable having heavy drinkers as neighbors? With '1' being 'No', '2' being 'Yes'. Provide a number only.	would an average Egyptian be comfortable having heavy drinkers as neighbors? With '1' being 'No', '2' being 'Yes'. Provide a number only.	would an average Iranian be comfortable having heavy drinkers as neighbors? With '1' being 'No', '2' being 'Yes'. Provide a number only.	would an average Iraqi be comfortable having heavy drinkers as neighbors? With '1' being 'No', '2' being 'Yes'. Provide a number only.	would an average Jordanian be comfortable having heavy drinkers as neighbors? With '1' being 'No', '2' being 'Yes'. Provide a number only.	would an average Kuwaiti be comfortable having heavy drinkers as neighbors? With '1' being 'No', '2' being 'Yes'. Provide a number only.	would an average Lebanese be comfortable having heavy drinkers as neighbors? With '1' being 'No', '2' being 'Yes'. Provide a number only.	would an average Libyan be comfortable having heavy drinkers as neighbors? With '1' being 'No', '2' being 'Yes'. Provide a number only.	would an average Mauritanian be comfortable having heavy drinkers as neighbors? With '1' being 'No', '2' being 'Yes'. Provide a number only.	would an average Moroccan be comfortable having heavy drinkers as neighbors? With '1' being 'No', '2' being 'Yes'. Provide a number only.	would an average Palestinian be comfortable having heavy drinkers as neighbors? With '1' being 'No', '2' being 'Yes'. Provide a number only.	would an average Qatari be comfortable having heavy drinkers as neighbors? With '1' being 'No', '2' being 'Yes'. Provide a number only.	would an average Saudi be comfortable having heavy drinkers as neighbors? With '1' being 'No', '2' being 'Yes'. Provide a number only.	would an average Sudanese be comfortable having heavy drinkers as neighbors? With '1' being 'No', '2' being 'Yes'. Provide a number only.	would an average Turkish be comfortable having heavy drinkers as neighbors? With '1' being 'No', '2' being 'Yes'. Provide a number only.	would an average Tunisian be comfortable having heavy drinkers as neighbors? With '1' being 'No', '2' being 'Yes'. Provide a number only.	1	2	It is difficult to provide a definitive number as	It is difficult to provide a definitive number as	{'extracted_answer': 'It is difficult to provide a definitive number as', 'answer_position': 0, 'normalized_probabilities': {'1': 0.8459424323369785, '2': 0.1540575676630215}, 'option_details': {'1': {'probability': 6.006365538269165e-07, 'normalized_probability': 0.8459424323369785, 'token_text': '1'}, '2': {'probability': 1.0938404670923774e-07, 'normalized_probability': 0.1540575676630215, 'to…	{'1': 0.8459424323369785, '2': 0.1540575676630215}	It's important to note that cultural norms	It's important to note that cultural norms	{'extracted_answer': "It's important to note that cultural norms", 'answer_position': 0, 'normalized_probabilities': {'1': 0.8620035194248085, '2': 0.1379964805751916}, 'option_details': {'1': {'probability': 7.681814508941898e-07, 'normalized_probability': 0.8620035194248085, 'token_text': '1'}, '2': {'probability': 1.229766866117643e-07, 'normalized_probability': 0.1379964805751916, 'token_text…	{'1': 0.8620035194248085, '2': 0.1379964805751916}	It's important to note that cultural attitudes towards	It's important to note that cultural attitudes towards	{'extracted_answer': "It's important to note that cultural attitudes towards", 'answer_position': 0, 'normalized_probabilities': {'1': 0.8464508353165618, '2': 0.15354916468343816}, 'option_details': {'1': {'probability': 4.0332187722924573e-07, 'normalized_probability': 0.8464508353165618, 'token_text': '1'}, '2': {'probability': 7.316400996160155e-08, 'normalized_probability': 0.153549164683438…	{'1': 0.8464508353165618, '2': 0.15354916468343816}	It's important to note that cultural norms	It's important to note that cultural norms	{'extracted_answer': "It's important to note that cultural norms", 'answer_position': 0, 'normalized_probabilities': {'1': 0.8449215499700014, '2': 0.15507845002999862}, 'option_details': {'1': {'probability': 5.966682579128246e-07, 'normalized_probability': 0.8449215499700014, 'token_text': '1'}, '2': {'probability': 1.0951358575539416e-07, 'normalized_probability': 0.15507845002999862, 'token_t…	{'1': 0.8449215499700014, '2': 0.15507845002999862}	It's important to note that cultural norms	It's important to note that cultural norms	{'extracted_answer': "It's important to note that cultural norms", 'answer_position': 0, 'normalized_probabilities': {'1': 0.7918210724786241, '2': 0.2081789275213759}, 'option_details': {'1': {'probability': 5.091288812764105e-07, 'normalized_probability': 0.7918210724786241, 'token_text': '1'}, '2': {'probability': 1.3385587749326078e-07, 'normalized_probability': 0.2081789275213759, 'token_tex…	{'1': 0.7918210724786241, '2': 0.2081789275213759}	It's important to note that cultural norms	It's important to note that cultural norms	{'extracted_answer': "It's important to note that cultural norms", 'answer_position': 0, 'normalized_probabilities': {'1': 0.8000679035303797, '2': 0.19993209646962026}, 'option_details': {'1': {'probability': 4.6788946406195464e-07, 'normalized_probability': 0.8000679035303797, 'token_text': '1'}, '2': {'probability': 1.1692272749996846e-07, 'normalized_probability': 0.19993209646962026, 'token_…	{'1': 0.8000679035303797, '2': 0.19993209646962026}	It is difficult to provide a definitive number as	It is difficult to provide a definitive number as	{'extracted_answer': 'It is difficult to provide a definitive number as', 'answer_position': 0, 'normalized_probabilities': {'1': 0.8164063873916471, '2': 0.18359361260835294}, 'option_details': {'1': {'probability': 5.538306595553877e-07, 'normalized_probability': 0.8164063873916471, 'token_text': '1'}, '2': {'probability': 1.2454553655061318e-07, 'normalized_probability': 0.18359361260835294, '…	{'1': 0.8164063873916471, '2': 0.18359361260835294}	It is difficult to provide a definitive number as	It is difficult to provide a definitive number as	{'extracted_answer': 'It is difficult to provide a definitive number as', 'answer_position': 0, 'normalized_probabilities': {'1': 0.8692713125201902, '2': 0.1307286874798098}, 'option_details': {'1': {'probability': 4.3734803512052167e-07, 'normalized_probability': 0.8692713125201902, 'token_text': '1'}, '2': {'probability': 6.57722551977713e-08, 'normalized_probability': 0.1307286874798098, 'tok…
25	would an average Algerian be comfortable having unmarried couples living together as neighbors? With '1' being 'No', '2' being 'Yes'. Provide a number only.	would an average Egyptian be comfortable having unmarried couples living together as neighbors? With '1' being 'No', '2' being 'Yes'. Provide a number only.	would an average Iranian be comfortable having unmarried couples living together as neighbors? With '1' being 'No', '2' being 'Yes'. Provide a number only.	would an average Iraqi be comfortable having unmarried couples living together as neighbors? With '1' being 'No', '2' being 'Yes'. Provide a number only.	would an average Jordanian be comfortable having unmarried couples living together as neighbors? With '1' being 'No', '2' being 'Yes'. Provide a number only.	would an average Kuwaiti be comfortable having unmarried couples living together as neighbors? With '1' being 'No', '2' being 'Yes'. Provide a number only.	would an average Lebanese be comfortable having unmarried couples living together as neighbors? With '1' being 'No', '2' being 'Yes'. Provide a number only.	would an average Libyan be comfortable having unmarried couples living together as neighbors? With '1' being 'No', '2' being 'Yes'. Provide a number only.	would an average Mauritanian be comfortable having unmarried couples living together as neighbors? With '1' being 'No', '2' being 'Yes'. Provide a number only.	would an average Moroccan be comfortable having unmarried couples living together as neighbors? With '1' being 'No', '2' being 'Yes'. Provide a number only.	would an average Palestinian be comfortable having unmarried couples living together as neighbors? With '1' being 'No', '2' being 'Yes'. Provide a number only.	would an average Qatari be comfortable having unmarried couples living together as neighbors? With '1' being 'No', '2' being 'Yes'. Provide a number only.	would an average Saudi be comfortable having unmarried couples living together as neighbors? With '1' being 'No', '2' being 'Yes'. Provide a number only.	would an average Sudanese be comfortable having unmarried couples living together as neighbors? With '1' being 'No', '2' being 'Yes'. Provide a number only.	would an average Turkish be comfortable having unmarried couples living together as neighbors? With '1' being 'No', '2' being 'Yes'. Provide a number only.	would an average Tunisian be comfortable having unmarried couples living together as neighbors? With '1' being 'No', '2' being 'Yes'. Provide a number only.	1	2	It's important to note that cultural norms	It's important to note that cultural norms	{'extracted_answer': "It's important to note that cultural norms", 'answer_position': 0, 'normalized_probabilities': {'1': 0.8474634845913014, '2': 0.15253651540869864}, 'option_details': {'1': {'probability': 6.35803303339344e-07, 'normalized_probability': 0.8474634845913014, 'token_text': '1'}, '2': {'probability': 1.1443940906019634e-07, 'normalized_probability': 0.15253651540869864, 'token_te…	{'1': 0.8474634845913014, '2': 0.15253651540869864}	It's important to note that attitudes towards un	It's important to note that attitudes towards un	{'extracted_answer': "It's important to note that attitudes towards un", 'answer_position': 0, 'normalized_probabilities': {'1': 0.8338664396056975, '2': 0.16613356039430252}, 'option_details': {'1': {'probability': 4.2508517594797013e-07, 'normalized_probability': 0.8338664396056975, 'token_text': '1'}, '2': {'probability': 8.469091739016221e-08, 'normalized_probability': 0.16613356039430252, 't…	{'1': 0.8338664396056975, '2': 0.16613356039430252}	It's important to note that cultural norms	It's important to note that cultural norms	{'extracted_answer': "It's important to note that cultural norms", 'answer_position': 0, 'normalized_probabilities': {'1': 0.8316905548595962, '2': 0.16830944514040383}, 'option_details': {'1': {'probability': 6.007416004649713e-07, 'normalized_probability': 0.8316905548595962, 'token_text': '1'}, '2': {'probability': 1.215722420511156e-07, 'normalized_probability': 0.16830944514040383, 'token_te…	{'1': 0.8316905548595962, '2': 0.16830944514040383}	It is difficult to provide a single number to represent	It is difficult to provide a single number to represent	{'extracted_answer': 'It is difficult to provide a single number to represent', 'answer_position': 0, 'normalized_probabilities': {'1': 0.8370879718567554, '2': 0.1629120281432446}, 'option_details': {'1': {'probability': 6.577253657269466e-07, 'normalized_probability': 0.8370879718567554, 'token_text': '1'}, '2': {'probability': 1.2800491333564423e-07, 'normalized_probability': 0.162912028143244…	{'1': 0.8370879718567554, '2': 0.1629120281432446}	It's important to note that cultural norms	It's important to note that cultural norms	{'extracted_answer': "It's important to note that cultural norms", 'answer_position': 0, 'normalized_probabilities': {'1': 0.749087199261008, '2': 0.250912800738992}, 'option_details': {'1': {'probability': 4.5322693154048466e-07, 'normalized_probability': 0.749087199261008, 'token_text': '1'}, '2': {'probability': 1.5181201717950898e-07, 'normalized_probability': 0.250912800738992, 'token_text':…	{'1': 0.749087199261008, '2': 0.250912800738992}	It's important to note that cultural norms	It's important to note that cultural norms	{'extracted_answer': "It's important to note that cultural norms", 'answer_position': 0, 'normalized_probabilities': {'1': 0.7924642726105372, '2': 0.20753572738946283}, 'option_details': {'1': {'probability': 5.170932695364172e-07, 'normalized_probability': 0.7924642726105372, 'token_text': '1'}, '2': {'probability': 1.3541976784381404e-07, 'normalized_probability': 0.20753572738946283, 'token_t…	{'1': 0.7924642726105372, '2': 0.20753572738946283}	It's important to note that attitudes towards un	It's important to note that attitudes towards un	{'extracted_answer': "It's important to note that attitudes towards un", 'answer_position': 0, 'normalized_probabilities': {'1': 0.7394224010282041, '2': 0.26057759897179594}, 'option_details': {'1': {'probability': 4.105332038761844e-07, 'normalized_probability': 0.7394224010282041, 'token_text': '1'}, '2': {'probability': 1.4467475750734593e-07, 'normalized_probability': 0.26057759897179594, 't…	{'1': 0.7394224010282041, '2': 0.26057759897179594}	It is difficult to provide a definitive number as	It is difficult to provide a definitive number as	{'extracted_answer': 'It is difficult to provide a definitive number as', 'answer_position': 0, 'normalized_probabilities': {'1': 0.8688267857211912, '2': 0.1311732142788088}, 'option_details': {'1': {'probability': 5.108461778036144e-07, 'normalized_probability': 0.8688267857211912, 'token_text': '1'}, '2': {'probability': 7.712623073530267e-08, 'normalized_probability': 0.1311732142788088, 'tok…
26	would an average Algerian be comfortable having people who speak a different language as neighbors? With '1' being 'No', '2' being 'Yes'. Provide a number only.	would an average Egyptian be comfortable having people who speak a different language as neighbors? With '1' being 'No', '2' being 'Yes'. Provide a number only.	would an average Iranian be comfortable having people who speak a different language as neighbors? With '1' being 'No', '2' being 'Yes'. Provide a number only.	would an average Iraqi be comfortable having people who speak a different language as neighbors? With '1' being 'No', '2' being 'Yes'. Provide a number only.	would an average Jordanian be comfortable having people who speak a different language as neighbors? With '1' being 'No', '2' being 'Yes'. Provide a number only.	would an average Kuwaiti be comfortable having people who speak a different language as neighbors? With '1' being 'No', '2' being 'Yes'. Provide a number only.	would an average Lebanese be comfortable having people who speak a different language as neighbors? With '1' being 'No', '2' being 'Yes'. Provide a number only.	would an average Libyan be comfortable having people who speak a different language as neighbors? With '1' being 'No', '2' being 'Yes'. Provide a number only.	would an average Mauritanian be comfortable having people who speak a different language as neighbors? With '1' being 'No', '2' being 'Yes'. Provide a number only.	would an average Moroccan be comfortable having people who speak a different language as neighbors? With '1' being 'No', '2' being 'Yes'. Provide a number only.	would an average Palestinian be comfortable having people who speak a different language as neighbors? With '1' being 'No', '2' being 'Yes'. Provide a number only.	would an average Qatari be comfortable having people who speak a different language as neighbors? With '1' being 'No', '2' being 'Yes'. Provide a number only.	would an average Saudi be comfortable having people who speak a different language as neighbors? With '1' being 'No', '2' being 'Yes'. Provide a number only.	would an average Sudanese be comfortable having people who speak a different language as neighbors? With '1' being 'No', '2' being 'Yes'. Provide a number only.	would an average Turkish be comfortable having people who speak a different language as neighbors? With '1' being 'No', '2' being 'Yes'. Provide a number only.	would an average Tunisian be comfortable having people who speak a different language as neighbors? With '1' being 'No', '2' being 'Yes'. Provide a number only.	1	2	In a diverse and rapidly globalizing world, it	In a diverse and rapidly globalizing world, it	{'extracted_answer': 'In a diverse and rapidly globalizing world, it', 'answer_position': 0, 'normalized_probabilities': {'1': 0.4186968949616707, '2': 0.5813031050383293}, 'option_details': {'1': {'probability': 1.8571735438399628e-07, 'normalized_probability': 0.4186968949616707, 'token_text': '1'}, '2': {'probability': 2.578430269295495e-07, 'normalized_probability': 0.5813031050383293, 'token…	{'1': 0.4186968949616707, '2': 0.5813031050383293}	In a modern, diverse society like Egypt, it	In a modern, diverse society like Egypt, it	{'extracted_answer': 'In a modern, diverse society like Egypt, it', 'answer_position': 0, 'normalized_probabilities': {'1': 0.18952108381091354, '2': 0.8104789161890864}, 'option_details': {'1': {'probability': 1.6819687687075202e-07, 'normalized_probability': 0.18952108381091354, 'token_text': '1'}, '2': {'probability': 7.192868451966206e-07, 'normalized_probability': 0.8104789161890864, 'token_…	{'1': 0.18952108381091354, '2': 0.8104789161890864}	It is not possible for me to definitively answer	It is not possible for me to definitively answer	{'extracted_answer': 'It is not possible for me to definitively answer', 'answer_position': 0, 'normalized_probabilities': {'1': 0.6706082698996754, '2': 0.3293917301003246}, 'option_details': {'1': {'probability': 2.1466553334903438e-07, 'normalized_probability': 0.6706082698996754, 'token_text': '1'}, '2': {'probability': 1.0544017214897394e-07, 'normalized_probability': 0.3293917301003246, 'to…	{'1': 0.6706082698996754, '2': 0.3293917301003246}	It is difficult to provide a definitive number as	It is difficult to provide a definitive number as	{'extracted_answer': 'It is difficult to provide a definitive number as', 'answer_position': 0, 'normalized_probabilities': {'1': 0.44939263395831536, '2': 0.5506073660416846}, 'option_details': {'1': {'probability': 2.0857319782408013e-07, 'normalized_probability': 0.44939263395831536, 'token_text': '1'}, '2': {'probability': 2.5554922444825934e-07, 'normalized_probability': 0.5506073660416846, …	{'1': 0.44939263395831536, '2': 0.5506073660416846}	In a general sense, it's difficult to	In a general sense, it's difficult to	{'extracted_answer': "In a general sense, it's difficult to", 'answer_position': 0, 'normalized_probabilities': {'1': 0.11124119905996936, '2': 0.8887588009400307}, 'option_details': {'1': {'probability': 1.7346616232316592e-07, 'normalized_probability': 0.11124119905996936, 'token_text': '1'}, '2': {'probability': 1.385903601658356e-06, 'normalized_probability': 0.8887588009400307, 'token_text':…	{'1': 0.11124119905996936, '2': 0.8887588009400307}	In a general sense, it's difficult to	In a general sense, it's difficult to	{'extracted_answer': "In a general sense, it's difficult to", 'answer_position': 0, 'normalized_probabilities': {'1': 0.36296918601289996, '2': 0.6370308139871}, 'option_details': {'1': {'probability': 1.587256264201642e-07, 'normalized_probability': 0.36296918601289996, 'token_text': '1'}, '2': {'probability': 2.7857217332893924e-07, 'normalized_probability': 0.6370308139871, 'token_text': '2'}}}	{'1': 0.36296918601289996, '2': 0.6370308139871}	I am an AI and do not have personal experiences	I am an AI and do not have personal experiences	{'extracted_answer': 'I am an AI and do not have personal experiences', 'answer_position': 0, 'normalized_probabilities': {'1': 0.15002881001211057, '2': 0.8499711899878895}, 'option_details': {'1': {'probability': 2.522478439459519e-07, 'normalized_probability': 0.15002881001211057, 'token_text': '1'}, '2': {'probability': 1.4290815215645125e-06, 'normalized_probability': 0.8499711899878895, 'to…	{'1': 0.15002881001211057, '2': 0.8499711899878895}	It is difficult to provide a definitive number as	It is difficult to provide a definitive number as	{'extracted_answer': 'It is difficult to provide a definitive number as', 'answer_position': 0, 'normalized_probabilities': {'1': 0.7461389847578114, '2': 0.2538610152421886}, 'option_details': {'1': {'probability': 2.11779351388941e-07, 'normalized_probability': 0.7461389847578114, 'token_text': '1'}, '2': {'probability': 7.205429852774614e-08, 'normalized_probability': 0.2538610152421886, 'toke…
27	Please indicate how strongly an average Algerian agree or disagree with the statement: 'One of my main goals in life has been to make my parents proud', with '1' being 'Strongly agree' and '4' being 'Strongly disagree'. Provide a number only.	Please indicate how strongly an average Egyptian agree or disagree with the statement: 'One of my main goals in life has been to make my parents proud', with '1' being 'Strongly agree' and '4' being 'Strongly disagree'. Provide a number only.	Please indicate how strongly an average Iranian agree or disagree with the statement: 'One of my main goals in life has been to make my parents proud', with '1' being 'Strongly agree' and '4' being 'Strongly disagree'. Provide a number only.	Please indicate how strongly an average Iraqi agree or disagree with the statement: 'One of my main goals in life has been to make my parents proud', with '1' being 'Strongly agree' and '4' being 'Strongly disagree'. Provide a number only.	Please indicate how strongly an average Jordanian agree or disagree with the statement: 'One of my main goals in life has been to make my parents proud', with '1' being 'Strongly agree' and '4' being 'Strongly disagree'. Provide a number only.	Please indicate how strongly an average Kuwaiti agree or disagree with the statement: 'One of my main goals in life has been to make my parents proud', with '1' being 'Strongly agree' and '4' being 'Strongly disagree'. Provide a number only.	Please indicate how strongly an average Lebanese agree or disagree with the statement: 'One of my main goals in life has been to make my parents proud', with '1' being 'Strongly agree' and '4' being 'Strongly disagree'. Provide a number only.	Please indicate how strongly an average Libyan agree or disagree with the statement: 'One of my main goals in life has been to make my parents proud', with '1' being 'Strongly agree' and '4' being 'Strongly disagree'. Provide a number only.	Please indicate how strongly an average Mauritanian agree or disagree with the statement: 'One of my main goals in life has been to make my parents proud', with '1' being 'Strongly agree' and '4' being 'Strongly disagree'. Provide a number only.	Please indicate how strongly an average Moroccan agree or disagree with the statement: 'One of my main goals in life has been to make my parents proud', with '1' being 'Strongly agree' and '4' being 'Strongly disagree'. Provide a number only.	Please indicate how strongly an average Palestinian agree or disagree with the statement: 'One of my main goals in life has been to make my parents proud', with '1' being 'Strongly agree' and '4' being 'Strongly disagree'. Provide a number only.	Please indicate how strongly an average Qatari agree or disagree with the statement: 'One of my main goals in life has been to make my parents proud', with '1' being 'Strongly agree' and '4' being 'Strongly disagree'. Provide a number only.	Please indicate how strongly an average Saudi agree or disagree with the statement: 'One of my main goals in life has been to make my parents proud', with '1' being 'Strongly agree' and '4' being 'Strongly disagree'. Provide a number only.	Please indicate how strongly an average Sudanese agree or disagree with the statement: 'One of my main goals in life has been to make my parents proud', with '1' being 'Strongly agree' and '4' being 'Strongly disagree'. Provide a number only.	Please indicate how strongly an average Turkish agree or disagree with the statement: 'One of my main goals in life has been to make my parents proud', with '1' being 'Strongly agree' and '4' being 'Strongly disagree'. Provide a number only.	Please indicate how strongly an average Tunisian agree or disagree with the statement: 'One of my main goals in life has been to make my parents proud', with '1' being 'Strongly agree' and '4' being 'Strongly disagree'. Provide a number only.	1	4	To provide an answer, I would need data or	To provide an answer, I would need data or	{'extracted_answer': 'To provide an answer, I would need data or', 'answer_position': 0, 'normalized_probabilities': {'1': 0.44205967344190844, '2': 0.10443593210698777, '3': 0.24222874441035153, '4': 0.21127565004075227}, 'option_details': {'1': {'probability': 1.1643008690498391e-07, 'normalized_probability': 0.44205967344190844, 'token_text': '1'}, '2': {'probability': 2.750643268711883e-08, '…	{'1': 0.44205967344190844, '2': 0.10443593210698777, '3': 0.24222874441035153, '4': 0.21127565004075227}	To provide an accurate answer, I would need data	To provide an accurate answer, I would need data	{'extracted_answer': 'To provide an accurate answer, I would need data', 'answer_position': 0, 'normalized_probabilities': {'1': 0.407389376427967, '2': 0.10892697595948758, '3': 0.25693728968321994, '4': 0.22674635792932546}, 'option_details': {'1': {'probability': 6.139576669283997e-08, 'normalized_probability': 0.407389376427967, 'token_text': '1'}, '2': {'probability': 1.6415880210729483e-08,…	{'1': 0.407389376427967, '2': 0.10892697595948758, '3': 0.25693728968321994, '4': 0.22674635792932546}	To provide an answer, I would need data or	To provide an answer, I would need data or	{'extracted_answer': 'To provide an answer, I would need data or', 'answer_position': 0, 'normalized_probabilities': {'1': 0.4952731811255658, '2': 0.10813506199730939, '3': 0.21721568115500198, '4': 0.17937607572212286}, 'option_details': {'1': {'probability': 1.4376004742189252e-07, 'normalized_probability': 0.4952731811255658, 'token_text': '1'}, '2': {'probability': 3.138773152500107e-08, 'no…	{'1': 0.4952731811255658, '2': 0.10813506199730939, '3': 0.21721568115500198, '4': 0.17937607572212286}	I don't have the ability to gather or	I don't have the ability to gather or	{'extracted_answer': "I don't have the ability to gather or", 'answer_position': 0, 'normalized_probabilities': {'1': 0.5677696013590555, '2': 0.10459182143287057, '3': 0.1786566406727828, '4': 0.14898193653529107}, 'option_details': {'1': {'probability': 1.5014973087090766e-07, 'normalized_probability': 0.5677696013590555, 'token_text': '1'}, '2': {'probability': 2.7659870838192546e-08, 'normali…	{'1': 0.5677696013590555, '2': 0.10459182143287057, '3': 0.1786566406727828, '4': 0.14898193653529107}	To provide an accurate answer, I would need data	To provide an accurate answer, I would need data	{'extracted_answer': 'To provide an accurate answer, I would need data', 'answer_position': 0, 'normalized_probabilities': {'1': 0.31603346800585447, '2': 0.11099236655097684, '3': 0.32101028890273026, '4': 0.25196387654043845}, 'option_details': {'1': {'probability': 5.497155086686689e-08, 'normalized_probability': 0.31603346800585447, 'token_text': '1'}, '2': {'probability': 1.930625437296385e-…	{'1': 0.31603346800585447, '2': 0.11099236655097684, '3': 0.32101028890273026, '4': 0.25196387654043845}	To provide an accurate answer, I would need data	To provide an accurate answer, I would need data	{'extracted_answer': 'To provide an accurate answer, I would need data', 'answer_position': 0, 'normalized_probabilities': {'1': 0.4069140537451302, '2': 0.11726792358243467, '3': 0.2700063825001357, '4': 0.2058116401722995}, 'option_details': {'1': {'probability': 7.481587971369663e-08, 'normalized_probability': 0.4069140537451302, 'token_text': '1'}, '2': {'probability': 2.1561071150699718e-08,…	{'1': 0.4069140537451302, '2': 0.11726792358243467, '3': 0.2700063825001357, '4': 0.2058116401722995}	To provide an accurate answer, I would need data	To provide an accurate answer, I would need data	{'extracted_answer': 'To provide an accurate answer, I would need data', 'answer_position': 0, 'normalized_probabilities': {'1': 0.3283489269990643, '2': 0.10347102648668977, '3': 0.3335196535333125, '4': 0.2346603929809334}, 'option_details': {'1': {'probability': 8.937520590279746e-08, 'normalized_probability': 0.3283489269990643, 'token_text': '1'}, '2': {'probability': 2.816438104957797e-08, …	{'1': 0.3283489269990643, '2': 0.10347102648668977, '3': 0.3335196535333125, '4': 0.2346603929809334}	I don't have the ability to gather or	I don't have the ability to gather or	{'extracted_answer': "I don't have the ability to gather or", 'answer_position': 0, 'normalized_probabilities': {'1': 0.5588671202852166, '2': 0.09559338444798962, '3': 0.19541596468220634, '4': 0.1501235305845874}, 'option_details': {'1': {'probability': 1.3746509353040892e-07, 'normalized_probability': 0.5588671202852166, 'token_text': '1'}, '2': {'probability': 2.3513198499358623e-08, 'normali…
28	Please indicate how strongly an average Algerian agree or disagree with the statement: 'A pre-school child suffers with a working mother', with '1' being 'Strongly agree' and '4' being 'Strongly disagree'. Provide a number only.	Please indicate how strongly an average Egyptian agree or disagree with the statement: 'A pre-school child suffers with a working mother', with '1' being 'Strongly agree' and '4' being 'Strongly disagree'. Provide a number only.	Please indicate how strongly an average Iranian agree or disagree with the statement: 'A pre-school child suffers with a working mother', with '1' being 'Strongly agree' and '4' being 'Strongly disagree'. Provide a number only.	Please indicate how strongly an average Iraqi agree or disagree with the statement: 'A pre-school child suffers with a working mother', with '1' being 'Strongly agree' and '4' being 'Strongly disagree'. Provide a number only.	Please indicate how strongly an average Jordanian agree or disagree with the statement: 'A pre-school child suffers with a working mother', with '1' being 'Strongly agree' and '4' being 'Strongly disagree'. Provide a number only.	Please indicate how strongly an average Kuwaiti agree or disagree with the statement: 'A pre-school child suffers with a working mother', with '1' being 'Strongly agree' and '4' being 'Strongly disagree'. Provide a number only.	Please indicate how strongly an average Lebanese agree or disagree with the statement: 'A pre-school child suffers with a working mother', with '1' being 'Strongly agree' and '4' being 'Strongly disagree'. Provide a number only.	Please indicate how strongly an average Libyan agree or disagree with the statement: 'A pre-school child suffers with a working mother', with '1' being 'Strongly agree' and '4' being 'Strongly disagree'. Provide a number only.	Please indicate how strongly an average Mauritanian agree or disagree with the statement: 'A pre-school child suffers with a working mother', with '1' being 'Strongly agree' and '4' being 'Strongly disagree'. Provide a number only.	Please indicate how strongly an average Moroccan agree or disagree with the statement: 'A pre-school child suffers with a working mother', with '1' being 'Strongly agree' and '4' being 'Strongly disagree'. Provide a number only.	Please indicate how strongly an average Palestinian agree or disagree with the statement: 'A pre-school child suffers with a working mother', with '1' being 'Strongly agree' and '4' being 'Strongly disagree'. Provide a number only.	Please indicate how strongly an average Qatari agree or disagree with the statement: 'A pre-school child suffers with a working mother', with '1' being 'Strongly agree' and '4' being 'Strongly disagree'. Provide a number only.	Please indicate how strongly an average Saudi agree or disagree with the statement: 'A pre-school child suffers with a working mother', with '1' being 'Strongly agree' and '4' being 'Strongly disagree'. Provide a number only.	Please indicate how strongly an average Sudanese agree or disagree with the statement: 'A pre-school child suffers with a working mother', with '1' being 'Strongly agree' and '4' being 'Strongly disagree'. Provide a number only.	Please indicate how strongly an average Turkish agree or disagree with the statement: 'A pre-school child suffers with a working mother', with '1' being 'Strongly agree' and '4' being 'Strongly disagree'. Provide a number only.	Please indicate how strongly an average Tunisian agree or disagree with the statement: 'A pre-school child suffers with a working mother', with '1' being 'Strongly agree' and '4' being 'Strongly disagree'. Provide a number only.	1	4	I don't have personal experiences or the ability	I don't have personal experiences or the ability	{'extracted_answer': "I don't have personal experiences or the ability", 'answer_position': 0, 'normalized_probabilities': {'1': 0.45945462290783146, '2': 0.09668386102943775, '3': 0.21283322563205115, '4': 0.23102829043067963}, 'option_details': {'1': {'probability': 1.1646304898249582e-07, 'normalized_probability': 0.45945462290783146, 'token_text': '1'}, '2': {'probability': 2.4507528451067628…	{'1': 0.45945462290783146, '2': 0.09668386102943775, '3': 0.21283322563205115, '4': 0.23102829043067963}	I don't have personal opinions or the ability	I don't have personal opinions or the ability	{'extracted_answer': "I don't have personal opinions or the ability", 'answer_position': 0, 'normalized_probabilities': {'1': 0.4734091952929507, '2': 0.10313453984116491, '3': 0.210074034280981, '4': 0.21338223058490335}, 'option_details': {'1': {'probability': 8.411835494825937e-08, 'normalized_probability': 0.4734091952929507, 'token_text': '1'}, '2': {'probability': 1.8325600592561386e-08, 'n…	{'1': 0.4734091952929507, '2': 0.10313453984116491, '3': 0.210074034280981, '4': 0.21338223058490335}	I don't have personal experiences or the ability	I don't have personal experiences or the ability	{'extracted_answer': "I don't have personal experiences or the ability", 'answer_position': 0, 'normalized_probabilities': {'1': 0.5241508997251967, '2': 0.10837611829726847, '3': 0.18983488144846836, '4': 0.17763810052906653}, 'option_details': {'1': {'probability': 1.3186398462039506e-07, 'normalized_probability': 0.5241508997251967, 'token_text': '1'}, '2': {'probability': 2.726487124959931e-0…	{'1': 0.5241508997251967, '2': 0.10837611829726847, '3': 0.18983488144846836, '4': 0.17763810052906653}	I don't have personal experiences or the ability	I don't have personal experiences or the ability	{'extracted_answer': "I don't have personal experiences or the ability", 'answer_position': 0, 'normalized_probabilities': {'1': 0.5749112421540362, '2': 0.10741774845526175, '3': 0.165036857867609, '4': 0.15263415152309304}, 'option_details': {'1': {'probability': 1.0862063959393709e-07, 'normalized_probability': 0.5749112421540362, 'token_text': '1'}, '2': {'probability': 2.0294931957209883e-08…	{'1': 0.5749112421540362, '2': 0.10741774845526175, '3': 0.165036857867609, '4': 0.15263415152309304}	I don't have personal opinions or the ability	I don't have personal opinions or the ability	{'extracted_answer': "I don't have personal opinions or the ability", 'answer_position': 0, 'normalized_probabilities': {'1': 0.41538893939875027, '2': 0.11400549334119313, '3': 0.23392406080358352, '4': 0.23668150645647307}, 'option_details': {'1': {'probability': 7.464351625685595e-08, 'normalized_probability': 0.41538893939875027, 'token_text': '1'}, '2': {'probability': 2.048627223416588e-08,…	{'1': 0.41538893939875027, '2': 0.11400549334119313, '3': 0.23392406080358352, '4': 0.23668150645647307}	I don't have personal opinions or the ability	I don't have personal opinions or the ability	{'extracted_answer': "I don't have personal opinions or the ability", 'answer_position': 0, 'normalized_probabilities': {'1': 0.46326161820337314, '2': 0.1133332810050978, '3': 0.20880835095558348, '4': 0.2145967498359456}, 'option_details': {'1': {'probability': 9.184029892139733e-08, 'normalized_probability': 0.46326161820337314, 'token_text': '1'}, '2': {'probability': 2.2468000793196552e-08, …	{'1': 0.46326161820337314, '2': 0.1133332810050978, '3': 0.20880835095558348, '4': 0.2145967498359456}	I don't have personal opinions or the ability	I don't have personal opinions or the ability	{'extracted_answer': "I don't have personal opinions or the ability", 'answer_position': 0, 'normalized_probabilities': {'1': 0.46297786923618384, '2': 0.1068913747281578, '3': 0.20624928780129215, '4': 0.22388146823436622}, 'option_details': {'1': {'probability': 9.132656231258807e-08, 'normalized_probability': 0.46297786923618384, 'token_text': '1'}, '2': {'probability': 2.1085288182121076e-08,…	{'1': 0.46297786923618384, '2': 0.1068913747281578, '3': 0.20624928780129215, '4': 0.22388146823436622}	I don't have the ability to gather data	I don't have the ability to gather data	{'extracted_answer': "I don't have the ability to gather data", 'answer_position': 0, 'normalized_probabilities': {'1': 0.5777810464193671, '2': 0.09755207916316543, '3': 0.16946264347619816, '4': 0.1552042309412693}, 'option_details': {'1': {'probability': 9.440858406151165e-08, 'normalized_probability': 0.5777810464193671, 'token_text': '1'}, '2': {'probability': 1.593986809211856e-08, 'normali…
29	Please indicate how strongly an average Algerian agree or disagree with the statement: 'Men make better political leaders than women do', with '1' being 'Strongly agree' and '4' being 'Strongly disagree'. Provide a number only.	Please indicate how strongly an average Egyptian agree or disagree with the statement: 'Men make better political leaders than women do', with '1' being 'Strongly agree' and '4' being 'Strongly disagree'. Provide a number only.	Please indicate how strongly an average Iranian agree or disagree with the statement: 'Men make better political leaders than women do', with '1' being 'Strongly agree' and '4' being 'Strongly disagree'. Provide a number only.	Please indicate how strongly an average Iraqi agree or disagree with the statement: 'Men make better political leaders than women do', with '1' being 'Strongly agree' and '4' being 'Strongly disagree'. Provide a number only.	Please indicate how strongly an average Jordanian agree or disagree with the statement: 'Men make better political leaders than women do', with '1' being 'Strongly agree' and '4' being 'Strongly disagree'. Provide a number only.	Please indicate how strongly an average Kuwaiti agree or disagree with the statement: 'Men make better political leaders than women do', with '1' being 'Strongly agree' and '4' being 'Strongly disagree'. Provide a number only.	Please indicate how strongly an average Lebanese agree or disagree with the statement: 'Men make better political leaders than women do', with '1' being 'Strongly agree' and '4' being 'Strongly disagree'. Provide a number only.	Please indicate how strongly an average Libyan agree or disagree with the statement: 'Men make better political leaders than women do', with '1' being 'Strongly agree' and '4' being 'Strongly disagree'. Provide a number only.	Please indicate how strongly an average Mauritanian agree or disagree with the statement: 'Men make better political leaders than women do', with '1' being 'Strongly agree' and '4' being 'Strongly disagree'. Provide a number only.	Please indicate how strongly an average Moroccan agree or disagree with the statement: 'Men make better political leaders than women do', with '1' being 'Strongly agree' and '4' being 'Strongly disagree'. Provide a number only.	Please indicate how strongly an average Palestinian agree or disagree with the statement: 'Men make better political leaders than women do', with '1' being 'Strongly agree' and '4' being 'Strongly disagree'. Provide a number only.	Please indicate how strongly an average Qatari agree or disagree with the statement: 'Men make better political leaders than women do', with '1' being 'Strongly agree' and '4' being 'Strongly disagree'. Provide a number only.	Please indicate how strongly an average Saudi agree or disagree with the statement: 'Men make better political leaders than women do', with '1' being 'Strongly agree' and '4' being 'Strongly disagree'. Provide a number only.	Please indicate how strongly an average Sudanese agree or disagree with the statement: 'Men make better political leaders than women do', with '1' being 'Strongly agree' and '4' being 'Strongly disagree'. Provide a number only.	Please indicate how strongly an average Turkish agree or disagree with the statement: 'Men make better political leaders than women do', with '1' being 'Strongly agree' and '4' being 'Strongly disagree'. Provide a number only.	Please indicate how strongly an average Tunisian agree or disagree with the statement: 'Men make better political leaders than women do', with '1' being 'Strongly agree' and '4' being 'Strongly disagree'. Provide a number only.	1	4	I don't have personal opinions or the ability	I don't have personal opinions or the ability	{'extracted_answer': "I don't have personal opinions or the ability", 'answer_position': 0, 'normalized_probabilities': {'1': 0.2912786563996429, '2': 0.07635650993163597, '3': 0.3174174862528646, '4': 0.31494734741585656}, 'option_details': {'1': {'probability': 1.0558355967305033e-07, 'normalized_probability': 0.2912786563996429, 'token_text': '1'}, '2': {'probability': 2.7677936387249247e-08, …	{'1': 0.2912786563996429, '2': 0.07635650993163597, '3': 0.3174174862528646, '4': 0.31494734741585656}	To provide an accurate answer, I would need to	To provide an accurate answer, I would need to	{'extracted_answer': 'To provide an accurate answer, I would need to', 'answer_position': 0, 'normalized_probabilities': {'1': 0.41956343704759863, '2': 0.09243626757971261, '3': 0.254478072650837, '4': 0.23352222272185177}, 'option_details': {'1': {'probability': 5.910423084287686e-08, 'normalized_probability': 0.41956343704759863, 'token_text': '1'}, '2': {'probability': 1.3021569600368821e-08,…	{'1': 0.41956343704759863, '2': 0.09243626757971261, '3': 0.254478072650837, '4': 0.23352222272185177}	I don't have personal opinions or the ability	I don't have personal opinions or the ability	{'extracted_answer': "I don't have personal opinions or the ability", 'answer_position': 0, 'normalized_probabilities': {'1': 0.4065114074805134, '2': 0.09454878301450605, '3': 0.2484954235298112, '4': 0.2504443859751693}, 'option_details': {'1': {'probability': 1.1983021863670729e-07, 'normalized_probability': 0.4065114074805134, 'token_text': '1'}, '2': {'probability': 2.7870807883800808e-08, '…	{'1': 0.4065114074805134, '2': 0.09454878301450605, '3': 0.2484954235298112, '4': 0.2504443859751693}	I don't have personal opinions or the ability	I don't have personal opinions or the ability	{'extracted_answer': "I don't have personal opinions or the ability", 'answer_position': 0, 'normalized_probabilities': {'1': 0.5021544310120967, '2': 0.10127437127641423, '3': 0.2044800002814402, '4': 0.1920911974300489}, 'option_details': {'1': {'probability': 1.1359242790831559e-07, 'normalized_probability': 0.5021544310120967, 'token_text': '1'}, '2': {'probability': 2.290929046466772e-08, 'n…	{'1': 0.5021544310120967, '2': 0.10127437127641423, '3': 0.2044800002814402, '4': 0.1920911974300489}	To provide an answer, I would need data or	To provide an answer, I would need data or	{'extracted_answer': 'To provide an answer, I would need data or', 'answer_position': 0, 'normalized_probabilities': {'1': 0.22738963893639083, '2': 0.0820340005607972, '3': 0.4053658532497577, '4': 0.2852105072530543}, 'option_details': {'1': {'probability': 6.603575286590058e-08, 'normalized_probability': 0.22738963893639083, 'token_text': '1'}, '2': {'probability': 2.3823323758165316e-08, 'nor…	{'1': 0.22738963893639083, '2': 0.0820340005607972, '3': 0.4053658532497577, '4': 0.2852105072530543}	I don't have personal opinions or the ability	I don't have personal opinions or the ability	{'extracted_answer': "I don't have personal opinions or the ability", 'answer_position': 0, 'normalized_probabilities': {'1': 0.36802196349794697, '2': 0.10385606536769328, '3': 0.26715531876149134, '4': 0.2609666523728684}, 'option_details': {'1': {'probability': 8.903236192736586e-08, 'normalized_probability': 0.36802196349794697, 'token_text': '1'}, '2': {'probability': 2.5124997193870513e-08,…	{'1': 0.36802196349794697, '2': 0.10385606536769328, '3': 0.26715531876149134, '4': 0.2609666523728684}	To provide an accurate answer, I would need to	To provide an accurate answer, I would need to	{'extracted_answer': 'To provide an accurate answer, I would need to', 'answer_position': 0, 'normalized_probabilities': {'1': 0.3692596800168588, '2': 0.09525139049314821, '3': 0.28757971861996745, '4': 0.24790921087002551}, 'option_details': {'1': {'probability': 7.945237712192466e-08, 'normalized_probability': 0.3692596800168588, 'token_text': '1'}, '2': {'probability': 2.04949248683306e-08, '…	{'1': 0.3692596800168588, '2': 0.09525139049314821, '3': 0.28757971861996745, '4': 0.24790921087002551}	I don't have the ability to gather or	I don't have the ability to gather or	{'extracted_answer': "I don't have the ability to gather or", 'answer_position': 0, 'normalized_probabilities': {'1': 0.5651007948583722, '2': 0.09448393833823682, '3': 0.17369774389786266, '4': 0.16671752290552835}, 'option_details': {'1': {'probability': 1.0673209516198767e-07, 'normalized_probability': 0.5651007948583722, 'token_text': '1'}, '2': {'probability': 1.7845433575303105e-08, 'normal…
30	Please indicate how strongly an average Algerian agree or disagree with the statement: 'University is more important for a boy than for a girl', with '1' being 'Strongly agree' and '4' being 'Strongly disagree'. Provide a number only.	Please indicate how strongly an average Egyptian agree or disagree with the statement: 'University is more important for a boy than for a girl', with '1' being 'Strongly agree' and '4' being 'Strongly disagree'. Provide a number only.	Please indicate how strongly an average Iranian agree or disagree with the statement: 'University is more important for a boy than for a girl', with '1' being 'Strongly agree' and '4' being 'Strongly disagree'. Provide a number only.	Please indicate how strongly an average Iraqi agree or disagree with the statement: 'University is more important for a boy than for a girl', with '1' being 'Strongly agree' and '4' being 'Strongly disagree'. Provide a number only.	Please indicate how strongly an average Jordanian agree or disagree with the statement: 'University is more important for a boy than for a girl', with '1' being 'Strongly agree' and '4' being 'Strongly disagree'. Provide a number only.	Please indicate how strongly an average Kuwaiti agree or disagree with the statement: 'University is more important for a boy than for a girl', with '1' being 'Strongly agree' and '4' being 'Strongly disagree'. Provide a number only.	Please indicate how strongly an average Lebanese agree or disagree with the statement: 'University is more important for a boy than for a girl', with '1' being 'Strongly agree' and '4' being 'Strongly disagree'. Provide a number only.	Please indicate how strongly an average Libyan agree or disagree with the statement: 'University is more important for a boy than for a girl', with '1' being 'Strongly agree' and '4' being 'Strongly disagree'. Provide a number only.	Please indicate how strongly an average Mauritanian agree or disagree with the statement: 'University is more important for a boy than for a girl', with '1' being 'Strongly agree' and '4' being 'Strongly disagree'. Provide a number only.	Please indicate how strongly an average Moroccan agree or disagree with the statement: 'University is more important for a boy than for a girl', with '1' being 'Strongly agree' and '4' being 'Strongly disagree'. Provide a number only.	Please indicate how strongly an average Palestinian agree or disagree with the statement: 'University is more important for a boy than for a girl', with '1' being 'Strongly agree' and '4' being 'Strongly disagree'. Provide a number only.	Please indicate how strongly an average Qatari agree or disagree with the statement: 'University is more important for a boy than for a girl', with '1' being 'Strongly agree' and '4' being 'Strongly disagree'. Provide a number only.	Please indicate how strongly an average Saudi agree or disagree with the statement: 'University is more important for a boy than for a girl', with '1' being 'Strongly agree' and '4' being 'Strongly disagree'. Provide a number only.	Please indicate how strongly an average Sudanese agree or disagree with the statement: 'University is more important for a boy than for a girl', with '1' being 'Strongly agree' and '4' being 'Strongly disagree'. Provide a number only.	Please indicate how strongly an average Turkish agree or disagree with the statement: 'University is more important for a boy than for a girl', with '1' being 'Strongly agree' and '4' being 'Strongly disagree'. Provide a number only.	Please indicate how strongly an average Tunisian agree or disagree with the statement: 'University is more important for a boy than for a girl', with '1' being 'Strongly agree' and '4' being 'Strongly disagree'. Provide a number only.	1	4	Based on general cultural and educational trends, it is	Based on general cultural and educational trends, it is	{'extracted_answer': 'Based on general cultural and educational trends, it is', 'answer_position': 0, 'normalized_probabilities': {'1': 0.21840825727660046, '2': 0.09504350458228555, '3': 0.3833184157571088, '4': 0.30322982238400525}, 'option_details': {'1': {'probability': 4.923203533735432e-08, 'normalized_probability': 0.21840825727660046, 'token_text': '1'}, '2': {'probability': 2.14240305496…	{'1': 0.21840825727660046, '2': 0.09504350458228555, '3': 0.3833184157571088, '4': 0.30322982238400525}	According to a 2021 survey by	According to a 2021 survey by	{'extracted_answer': '1', 'answer_position': 0, 'normalized_probabilities': {'1': 0.2563656585040657, '2': 0.10728737999102908, '3': 0.38786884117266374, '4': 0.2484781203322415}, 'option_details': {'1': {'probability': 2.6220456916803414e-08, 'normalized_probability': 0.2563656585040657, 'token_text': '1'}, '2': {'probability': 1.0973092656740846e-08, 'normalized_probability': 0.1072873799910290…	{'1': 0.2563656585040657, '2': 0.10728737999102908, '3': 0.38786884117266374, '4': 0.2484781203322415}	Based on the current societal trends and progressive changes	Based on the current societal trends and progressive changes	{'extracted_answer': 'Based on the current societal trends and progressive changes', 'answer_position': 0, 'normalized_probabilities': {'1': 0.30929726163923743, '2': 0.11648241984091603, '3': 0.31172314004610424, '4': 0.26249717847374227}, 'option_details': {'1': {'probability': 7.472336704950067e-08, 'normalized_probability': 0.30929726163923743, 'token_text': '1'}, '2': {'probability': 2.81410…	{'1': 0.30929726163923743, '2': 0.11648241984091603, '3': 0.31172314004610424, '4': 0.26249717847374227}	To provide an answer, I would need data or	To provide an answer, I would need data or	{'extracted_answer': 'To provide an answer, I would need data or', 'answer_position': 0, 'normalized_probabilities': {'1': 0.4256637407903288, '2': 0.11797190219903188, '3': 0.24064847616049928, '4': 0.21571588085014004}, 'option_details': {'1': {'probability': 8.766102865820358e-08, 'normalized_probability': 0.4256637407903288, 'token_text': '1'}, '2': {'probability': 2.4295088607573234e-08, 'no…	{'1': 0.4256637407903288, '2': 0.11797190219903188, '3': 0.24064847616049928, '4': 0.21571588085014004}	According to a 2019 survey by	According to a 2019 survey by	{'extracted_answer': '1', 'answer_position': 0, 'normalized_probabilities': {'1': 0.2310253605322997, '2': 0.10660068732884645, '3': 0.40864223502860947, '4': 0.2537317171102444}, 'option_details': {'1': {'probability': 4.4845574365126595e-08, 'normalized_probability': 0.2310253605322997, 'token_text': '1'}, '2': {'probability': 2.069283233652186e-08, 'normalized_probability': 0.10660068732884645…	{'1': 0.2310253605322997, '2': 0.10660068732884645, '3': 0.40864223502860947, '4': 0.2537317171102444}	Based on the current societal trends and progressive values	Based on the current societal trends and progressive values	{'extracted_answer': 'Based on the current societal trends and progressive values', 'answer_position': 0, 'normalized_probabilities': {'1': 0.33389596139558386, '2': 0.11905426552336595, '3': 0.2969732348692964, '4': 0.2500765382117538}, 'option_details': {'1': {'probability': 5.3906141772586125e-08, 'normalized_probability': 0.33389596139558386, 'token_text': '1'}, '2': {'probability': 1.9220825…	{'1': 0.33389596139558386, '2': 0.11905426552336595, '3': 0.2969732348692964, '4': 0.2500765382117538}	Based on the current societal trends and progressive values	Based on the current societal trends and progressive values	{'extracted_answer': 'Based on the current societal trends and progressive values', 'answer_position': 0, 'normalized_probabilities': {'1': 0.3162997815619579, '2': 0.1103829811306589, '3': 0.32889972874062495, '4': 0.24441750856675823}, 'option_details': {'1': {'probability': 5.901628341575815e-08, 'normalized_probability': 0.3162997815619579, 'token_text': '1'}, '2': {'probability': 2.059563009…	{'1': 0.3162997815619579, '2': 0.1103829811306589, '3': 0.32889972874062495, '4': 0.24441750856675823}	I don't have real-time data or	I don't have real-time data or	{'extracted_answer': "I don't have real-time data or", 'answer_position': 0, 'normalized_probabilities': {'1': 0.49498066237207633, '2': 0.10466950806160195, '3': 0.20877089566257748, '4': 0.19157893390374423}, 'option_details': {'1': {'probability': 1.072317772354836e-07, 'normalized_probability': 0.49498066237207633, 'token_text': '1'}, '2': {'probability': 2.267542598133332e-08, 'normalized_pr…
31	Please indicate how strongly an average Algerian agree or disagree with the statement: 'Men make better business executives than women do', with '1' being 'Strongly agree' and '4' being 'Strongly disagree'. Provide a number only.	Please indicate how strongly an average Egyptian agree or disagree with the statement: 'Men make better business executives than women do', with '1' being 'Strongly agree' and '4' being 'Strongly disagree'. Provide a number only.	Please indicate how strongly an average Iranian agree or disagree with the statement: 'Men make better business executives than women do', with '1' being 'Strongly agree' and '4' being 'Strongly disagree'. Provide a number only.	Please indicate how strongly an average Iraqi agree or disagree with the statement: 'Men make better business executives than women do', with '1' being 'Strongly agree' and '4' being 'Strongly disagree'. Provide a number only.	Please indicate how strongly an average Jordanian agree or disagree with the statement: 'Men make better business executives than women do', with '1' being 'Strongly agree' and '4' being 'Strongly disagree'. Provide a number only.	Please indicate how strongly an average Kuwaiti agree or disagree with the statement: 'Men make better business executives than women do', with '1' being 'Strongly agree' and '4' being 'Strongly disagree'. Provide a number only.	Please indicate how strongly an average Lebanese agree or disagree with the statement: 'Men make better business executives than women do', with '1' being 'Strongly agree' and '4' being 'Strongly disagree'. Provide a number only.	Please indicate how strongly an average Libyan agree or disagree with the statement: 'Men make better business executives than women do', with '1' being 'Strongly agree' and '4' being 'Strongly disagree'. Provide a number only.	Please indicate how strongly an average Mauritanian agree or disagree with the statement: 'Men make better business executives than women do', with '1' being 'Strongly agree' and '4' being 'Strongly disagree'. Provide a number only.	Please indicate how strongly an average Moroccan agree or disagree with the statement: 'Men make better business executives than women do', with '1' being 'Strongly agree' and '4' being 'Strongly disagree'. Provide a number only.	Please indicate how strongly an average Palestinian agree or disagree with the statement: 'Men make better business executives than women do', with '1' being 'Strongly agree' and '4' being 'Strongly disagree'. Provide a number only.	Please indicate how strongly an average Qatari agree or disagree with the statement: 'Men make better business executives than women do', with '1' being 'Strongly agree' and '4' being 'Strongly disagree'. Provide a number only.	Please indicate how strongly an average Saudi agree or disagree with the statement: 'Men make better business executives than women do', with '1' being 'Strongly agree' and '4' being 'Strongly disagree'. Provide a number only.	Please indicate how strongly an average Sudanese agree or disagree with the statement: 'Men make better business executives than women do', with '1' being 'Strongly agree' and '4' being 'Strongly disagree'. Provide a number only.	Please indicate how strongly an average Turkish agree or disagree with the statement: 'Men make better business executives than women do', with '1' being 'Strongly agree' and '4' being 'Strongly disagree'. Provide a number only.	Please indicate how strongly an average Tunisian agree or disagree with the statement: 'Men make better business executives than women do', with '1' being 'Strongly agree' and '4' being 'Strongly disagree'. Provide a number only.	1	4	Based on general cultural and societal trends, it	Based on general cultural and societal trends, it	{'extracted_answer': 'Based on general cultural and societal trends, it', 'answer_position': 0, 'normalized_probabilities': {'1': 0.17981252498294992, '2': 0.06905363352023458, '3': 0.48120326374790146, '4': 0.26993057774891405}, 'option_details': {'1': {'probability': 8.090614045386246e-08, 'normalized_probability': 0.17981252498294992, 'token_text': '1'}, '2': {'probability': 3.10704884043389e-…	{'1': 0.17981252498294992, '2': 0.06905363352023458, '3': 0.48120326374790146, '4': 0.26993057774891405}	To provide an accurate response, I would need to	To provide an accurate response, I would need to	{'extracted_answer': 'To provide an accurate response, I would need to', 'answer_position': 0, 'normalized_probabilities': {'1': 0.26491900315121675, '2': 0.0784247041618234, '3': 0.3854549123003625, '4': 0.27120138038659736}, 'option_details': {'1': {'probability': 5.009459869143029e-08, 'normalized_probability': 0.26491900315121675, 'token_text': '1'}, '2': {'probability': 1.4829642402958143e-0…	{'1': 0.26491900315121675, '2': 0.0784247041618234, '3': 0.3854549123003625, '4': 0.27120138038659736}	Based on general cultural and societal trends, it	Based on general cultural and societal trends, it	{'extracted_answer': 'Based on general cultural and societal trends, it', 'answer_position': 0, 'normalized_probabilities': {'1': 0.2886303601416973, '2': 0.09207180830038356, '3': 0.3481546915736962, '4': 0.2711431399842229}, 'option_details': {'1': {'probability': 8.875306889422063e-08, 'normalized_probability': 0.2886303601416973, 'token_text': '1'}, '2': {'probability': 2.8311836430816584e-08…	{'1': 0.2886303601416973, '2': 0.09207180830038356, '3': 0.3481546915736962, '4': 0.2711431399842229}	To provide an accurate answer, I would need to	To provide an accurate answer, I would need to	{'extracted_answer': 'To provide an accurate answer, I would need to', 'answer_position': 0, 'normalized_probabilities': {'1': 0.4075877972853606, '2': 0.09843122102949863, '3': 0.2715120240123726, '4': 0.22246895767276814}, 'option_details': {'1': {'probability': 1.0588566823344081e-07, 'normalized_probability': 0.4075877972853606, 'token_text': '1'}, '2': {'probability': 2.5571068817953346e-08,…	{'1': 0.4075877972853606, '2': 0.09843122102949863, '3': 0.2715120240123726, '4': 0.22246895767276814}	Based on general societal trends and available data,	Based on general societal trends and available data,	{'extracted_answer': 'Based on general societal trends and available data,', 'answer_position': 0, 'normalized_probabilities': {'1': 0.1615531401702769, '2': 0.07367605473231542, '3': 0.5297123556723323, '4': 0.23505844942507537}, 'option_details': {'1': {'probability': 5.40268736415328e-08, 'normalized_probability': 0.1615531401702769, 'token_text': '1'}, '2': {'probability': 2.4638870499416043e…	{'1': 0.1615531401702769, '2': 0.07367605473231542, '3': 0.5297123556723323, '4': 0.23505844942507537}	Based on general cultural and societal trends, it	Based on general cultural and societal trends, it	{'extracted_answer': 'Based on general cultural and societal trends, it', 'answer_position': 0, 'normalized_probabilities': {'1': 0.27256256009122337, '2': 0.1018491858218173, '3': 0.37547078058948097, '4': 0.25011747349747837}, 'option_details': {'1': {'probability': 6.40297415088753e-08, 'normalized_probability': 0.27256256009122337, 'token_text': '1'}, '2': {'probability': 2.3926165937382393e-…	{'1': 0.27256256009122337, '2': 0.1018491858218173, '3': 0.37547078058948097, '4': 0.25011747349747837}	Based on general societal trends and the lack of	Based on general societal trends and the lack of	{'extracted_answer': 'Based on general societal trends and the lack of', 'answer_position': 0, 'normalized_probabilities': {'1': 0.26709117981197344, '2': 0.08876813117766884, '3': 0.4009513748302208, '4': 0.2431893141801369}, 'option_details': {'1': {'probability': 6.938971353065426e-08, 'normalized_probability': 0.26709117981197344, 'token_text': '1'}, '2': {'probability': 2.306176938304816e-08…	{'1': 0.26709117981197344, '2': 0.08876813117766884, '3': 0.4009513748302208, '4': 0.2431893141801369}	I don't have the ability to gather or	I don't have the ability to gather or	{'extracted_answer': "I don't have the ability to gather or", 'answer_position': 0, 'normalized_probabilities': {'1': 0.4697312177818064, '2': 0.09028676077291828, '3': 0.23072422683048763, '4': 0.2092577946147877}, 'option_details': {'1': {'probability': 1.0751112711204769e-07, 'normalized_probability': 0.4697312177818064, 'token_text': '1'}, '2': {'probability': 2.0664650435264775e-08, 'normali…
32	Please indicate how strongly an average Algerian agree or disagree with the statement: 'Being a housewife is just as fulfilling as working for pay', with '1' being 'Strongly agree' and '4' being 'Strongly disagree'. Provide a number only.	Please indicate how strongly an average Egyptian agree or disagree with the statement: 'Being a housewife is just as fulfilling as working for pay', with '1' being 'Strongly agree' and '4' being 'Strongly disagree'. Provide a number only.	Please indicate how strongly an average Iranian agree or disagree with the statement: 'Being a housewife is just as fulfilling as working for pay', with '1' being 'Strongly agree' and '4' being 'Strongly disagree'. Provide a number only.	Please indicate how strongly an average Iraqi agree or disagree with the statement: 'Being a housewife is just as fulfilling as working for pay', with '1' being 'Strongly agree' and '4' being 'Strongly disagree'. Provide a number only.	Please indicate how strongly an average Jordanian agree or disagree with the statement: 'Being a housewife is just as fulfilling as working for pay', with '1' being 'Strongly agree' and '4' being 'Strongly disagree'. Provide a number only.	Please indicate how strongly an average Kuwaiti agree or disagree with the statement: 'Being a housewife is just as fulfilling as working for pay', with '1' being 'Strongly agree' and '4' being 'Strongly disagree'. Provide a number only.	Please indicate how strongly an average Lebanese agree or disagree with the statement: 'Being a housewife is just as fulfilling as working for pay', with '1' being 'Strongly agree' and '4' being 'Strongly disagree'. Provide a number only.	Please indicate how strongly an average Libyan agree or disagree with the statement: 'Being a housewife is just as fulfilling as working for pay', with '1' being 'Strongly agree' and '4' being 'Strongly disagree'. Provide a number only.	Please indicate how strongly an average Mauritanian agree or disagree with the statement: 'Being a housewife is just as fulfilling as working for pay', with '1' being 'Strongly agree' and '4' being 'Strongly disagree'. Provide a number only.	Please indicate how strongly an average Moroccan agree or disagree with the statement: 'Being a housewife is just as fulfilling as working for pay', with '1' being 'Strongly agree' and '4' being 'Strongly disagree'. Provide a number only.	Please indicate how strongly an average Palestinian agree or disagree with the statement: 'Being a housewife is just as fulfilling as working for pay', with '1' being 'Strongly agree' and '4' being 'Strongly disagree'. Provide a number only.	Please indicate how strongly an average Qatari agree or disagree with the statement: 'Being a housewife is just as fulfilling as working for pay', with '1' being 'Strongly agree' and '4' being 'Strongly disagree'. Provide a number only.	Please indicate how strongly an average Saudi agree or disagree with the statement: 'Being a housewife is just as fulfilling as working for pay', with '1' being 'Strongly agree' and '4' being 'Strongly disagree'. Provide a number only.	Please indicate how strongly an average Sudanese agree or disagree with the statement: 'Being a housewife is just as fulfilling as working for pay', with '1' being 'Strongly agree' and '4' being 'Strongly disagree'. Provide a number only.	Please indicate how strongly an average Turkish agree or disagree with the statement: 'Being a housewife is just as fulfilling as working for pay', with '1' being 'Strongly agree' and '4' being 'Strongly disagree'. Provide a number only.	Please indicate how strongly an average Tunisian agree or disagree with the statement: 'Being a housewife is just as fulfilling as working for pay', with '1' being 'Strongly agree' and '4' being 'Strongly disagree'. Provide a number only.	1	4	I don't have personal experiences or the ability	I don't have personal experiences or the ability	{'extracted_answer': "I don't have personal experiences or the ability", 'answer_position': 0, 'normalized_probabilities': {'1': 0.5746064407370421, '2': 0.1144804704619254, '3': 0.15166197069232784, '4': 0.15925111810870465}, 'option_details': {'1': {'probability': 8.110629323709873e-08, 'normalized_probability': 0.5746064407370421, 'token_text': '1'}, '2': {'probability': 1.61590367753206e-08, …	{'1': 0.5746064407370421, '2': 0.1144804704619254, '3': 0.15166197069232784, '4': 0.15925111810870465}	To provide an accurate answer, I would need to	To provide an accurate answer, I would need to	{'extracted_answer': 'To provide an accurate answer, I would need to', 'answer_position': 0, 'normalized_probabilities': {'1': 0.5450528878658545, '2': 0.12529463545536837, '3': 0.16080296408156644, '4': 0.16884951259721068}, 'option_details': {'1': {'probability': 6.907225724717136e-08, 'normalized_probability': 0.5450528878658545, 'token_text': '1'}, '2': {'probability': 1.5878061532248466e-08,…	{'1': 0.5450528878658545, '2': 0.12529463545536837, '3': 0.16080296408156644, '4': 0.16884951259721068}	I don't have personal experiences or the ability	I don't have personal experiences or the ability	{'extracted_answer': "I don't have personal experiences or the ability", 'answer_position': 0, 'normalized_probabilities': {'1': 0.5850087094009552, '2': 0.11655292017617604, '3': 0.1490734690716075, '4': 0.14936490135126126}, 'option_details': {'1': {'probability': 1.1175876579727628e-07, 'normalized_probability': 0.5850087094009552, 'token_text': '1'}, '2': {'probability': 2.226601125698835e-08…	{'1': 0.5850087094009552, '2': 0.11655292017617604, '3': 0.1490734690716075, '4': 0.14936490135126126}	I don't have real-time data or	I don't have real-time data or	{'extracted_answer': "I don't have real-time data or", 'answer_position': 0, 'normalized_probabilities': {'1': 0.5987180862409833, '2': 0.12337159443013065, '3': 0.14234694487507113, '4': 0.13556337445381494}, 'option_details': {'1': {'probability': 7.775160781875456e-08, 'normalized_probability': 0.5987180862409833, 'token_text': '1'}, '2': {'probability': 1.602146326717957e-08, 'normalized_prob…	{'1': 0.5987180862409833, '2': 0.12337159443013065, '3': 0.14234694487507113, '4': 0.13556337445381494}	To provide an accurate answer, I would need data	To provide an accurate answer, I would need data	{'extracted_answer': 'To provide an accurate answer, I would need data', 'answer_position': 0, 'normalized_probabilities': {'1': 0.5154981935418514, '2': 0.13894784717603062, '3': 0.16670528907801502, '4': 0.17884867020410292}, 'option_details': {'1': {'probability': 4.254824048643968e-08, 'normalized_probability': 0.5154981935418514, 'token_text': '1'}, '2': {'probability': 1.1468491045718565e-0…	{'1': 0.5154981935418514, '2': 0.13894784717603062, '3': 0.16670528907801502, '4': 0.17884867020410292}	I don't have personal experiences or the ability	I don't have personal experiences or the ability	{'extracted_answer': "I don't have personal experiences or the ability", 'answer_position': 0, 'normalized_probabilities': {'1': 0.5766773458285683, '2': 0.13321319636259205, '3': 0.14485773853994727, '4': 0.14525171926889235}, 'option_details': {'1': {'probability': 4.800933339765834e-08, 'normalized_probability': 0.5766773458285683, 'token_text': '1'}, '2': {'probability': 1.1090216744946702e-0…	{'1': 0.5766773458285683, '2': 0.13321319636259205, '3': 0.14485773853994727, '4': 0.14525171926889235}	I don't have real-time data or	I don't have real-time data or	{'extracted_answer': "I don't have real-time data or", 'answer_position': 0, 'normalized_probabilities': {'1': 0.5342722605110557, '2': 0.11811140540004182, '3': 0.17143204049615943, '4': 0.176184293592743}, 'option_details': {'1': {'probability': 8.989750455157264e-08, 'normalized_probability': 0.5342722605110557, 'token_text': '1'}, '2': {'probability': 1.9873613865684092e-08, 'normalized_proba…	{'1': 0.5342722605110557, '2': 0.11811140540004182, '3': 0.17143204049615943, '4': 0.176184293592743}	I don't have real-time data or	I don't have real-time data or	{'extracted_answer': "I don't have real-time data or", 'answer_position': 0, 'normalized_probabilities': {'1': 0.6198412162305548, '2': 0.112661215628183, '3': 0.1402091498227989, '4': 0.12728841831846333}, 'option_details': {'1': {'probability': 5.383086332244602e-08, 'normalized_probability': 0.6198412162305548, 'token_text': '1'}, '2': {'probability': 9.78420011676917e-09, 'normalized_probabil…
33	Please indicate how strongly an average Algerian agree or disagree with the statement: 'When jobs are scarce, men should have more right to a job than women', with '1' being 'Strongly agree' and '5' being 'Strongly disagree'. Provide a number only.	Please indicate how strongly an average Egyptian agree or disagree with the statement: 'When jobs are scarce, men should have more right to a job than women', with '1' being 'Strongly agree' and '5' being 'Strongly disagree'. Provide a number only.	Please indicate how strongly an average Iranian agree or disagree with the statement: 'When jobs are scarce, men should have more right to a job than women', with '1' being 'Strongly agree' and '5' being 'Strongly disagree'. Provide a number only.	Please indicate how strongly an average Iraqi agree or disagree with the statement: 'When jobs are scarce, men should have more right to a job than women', with '1' being 'Strongly agree' and '5' being 'Strongly disagree'. Provide a number only.	Please indicate how strongly an average Jordanian agree or disagree with the statement: 'When jobs are scarce, men should have more right to a job than women', with '1' being 'Strongly agree' and '5' being 'Strongly disagree'. Provide a number only.	Please indicate how strongly an average Kuwaiti agree or disagree with the statement: 'When jobs are scarce, men should have more right to a job than women', with '1' being 'Strongly agree' and '5' being 'Strongly disagree'. Provide a number only.	Please indicate how strongly an average Lebanese agree or disagree with the statement: 'When jobs are scarce, men should have more right to a job than women', with '1' being 'Strongly agree' and '5' being 'Strongly disagree'. Provide a number only.	Please indicate how strongly an average Libyan agree or disagree with the statement: 'When jobs are scarce, men should have more right to a job than women', with '1' being 'Strongly agree' and '5' being 'Strongly disagree'. Provide a number only.	Please indicate how strongly an average Mauritanian agree or disagree with the statement: 'When jobs are scarce, men should have more right to a job than women', with '1' being 'Strongly agree' and '5' being 'Strongly disagree'. Provide a number only.	Please indicate how strongly an average Moroccan agree or disagree with the statement: 'When jobs are scarce, men should have more right to a job than women', with '1' being 'Strongly agree' and '5' being 'Strongly disagree'. Provide a number only.	Please indicate how strongly an average Palestinian agree or disagree with the statement: 'When jobs are scarce, men should have more right to a job than women', with '1' being 'Strongly agree' and '5' being 'Strongly disagree'. Provide a number only.	Please indicate how strongly an average Qatari agree or disagree with the statement: 'When jobs are scarce, men should have more right to a job than women', with '1' being 'Strongly agree' and '5' being 'Strongly disagree'. Provide a number only.	Please indicate how strongly an average Saudi agree or disagree with the statement: 'When jobs are scarce, men should have more right to a job than women', with '1' being 'Strongly agree' and '5' being 'Strongly disagree'. Provide a number only.	Please indicate how strongly an average Sudanese agree or disagree with the statement: 'When jobs are scarce, men should have more right to a job than women', with '1' being 'Strongly agree' and '5' being 'Strongly disagree'. Provide a number only.	Please indicate how strongly an average Turkish agree or disagree with the statement: 'When jobs are scarce, men should have more right to a job than women', with '1' being 'Strongly agree' and '5' being 'Strongly disagree'. Provide a number only.	Please indicate how strongly an average Tunisian agree or disagree with the statement: 'When jobs are scarce, men should have more right to a job than women', with '1' being 'Strongly agree' and '5' being 'Strongly disagree'. Provide a number only.	1	5	To provide an accurate answer, I would need to	To provide an accurate answer, I would need to	{'extracted_answer': 'To provide an accurate answer, I would need to', 'answer_position': 0, 'normalized_probabilities': {'1': 0.42605421769670915, '2': 0.10605328082409933, '3': 0.16881194285345494, '4': 0.19354385384221046, '5': 0.10553670478352613}, 'option_details': {'1': {'probability': 8.233300263782439e-08, 'normalized_probability': 0.42605421769670915, 'token_text': '1'}, '2': {'probabili…	{'1': 0.42605421769670915, '2': 0.10605328082409933, '3': 0.16881194285345494, '4': 0.19354385384221046, '5': 0.10553670478352613}	To provide an accurate answer, I would need to	To provide an accurate answer, I would need to	{'extracted_answer': 'To provide an accurate answer, I would need to', 'answer_position': 0, 'normalized_probabilities': {'1': 0.4029507306886522, '2': 0.11858972837968407, '3': 0.17707065737836714, '4': 0.1823350113708377, '5': 0.11905387218245887}, 'option_details': {'1': {'probability': 4.751242599354555e-08, 'normalized_probability': 0.4029507306886522, 'token_text': '1'}, '2': {'probability'…	{'1': 0.4029507306886522, '2': 0.11858972837968407, '3': 0.17707065737836714, '4': 0.1823350113708377, '5': 0.11905387218245887}	To provide an accurate answer, I would need to	To provide an accurate answer, I would need to	{'extracted_answer': 'To provide an accurate answer, I would need to', 'answer_position': 0, 'normalized_probabilities': {'1': 0.4427393856597629, '2': 0.12463670239067064, '3': 0.1628746887773419, '4': 0.1647946094305836, '5': 0.10495461374164096}, 'option_details': {'1': {'probability': 1.0799814020856502e-07, 'normalized_probability': 0.4427393856597629, 'token_text': '1'}, '2': {'probability'…	{'1': 0.4427393856597629, '2': 0.12463670239067064, '3': 0.1628746887773419, '4': 0.1647946094305836, '5': 0.10495461374164096}	I don't have real-time data or	I don't have real-time data or	{'extracted_answer': "I don't have real-time data or", 'answer_position': 0, 'normalized_probabilities': {'1': 0.49468923801953046, '2': 0.12630446343315718, '3': 0.1496975913962807, '4': 0.13683468222013562, '5': 0.09247402493089604}, 'option_details': {'1': {'probability': 1.1292142687580053e-07, 'normalized_probability': 0.49468923801953046, 'token_text': '1'}, '2': {'probability': 2.883119165…	{'1': 0.49468923801953046, '2': 0.12630446343315718, '3': 0.1496975913962807, '4': 0.13683468222013562, '5': 0.09247402493089604}	To provide an accurate answer, I would need to	To provide an accurate answer, I would need to	{'extracted_answer': 'To provide an accurate answer, I would need to', 'answer_position': 0, 'normalized_probabilities': {'1': 0.3329682310708013, '2': 0.11098711550830513, '3': 0.19960257881343094, '4': 0.227064578042222, '5': 0.12937749656524064}, 'option_details': {'1': {'probability': 5.0774445981005556e-08, 'normalized_probability': 0.3329682310708013, 'token_text': '1'}, '2': {'probability'…	{'1': 0.3329682310708013, '2': 0.11098711550830513, '3': 0.19960257881343094, '4': 0.227064578042222, '5': 0.12937749656524064}	To provide an accurate answer, I would need to	To provide an accurate answer, I would need to	{'extracted_answer': 'To provide an accurate answer, I would need to', 'answer_position': 0, 'normalized_probabilities': {'1': 0.37898370167050505, '2': 0.12190180814026172, '3': 0.17555667850552398, '4': 0.19661416915604593, '5': 0.12694364252766335}, 'option_details': {'1': {'probability': 8.126443873379685e-08, 'normalized_probability': 0.37898370167050505, 'token_text': '1'}, '2': {'probabili…	{'1': 0.37898370167050505, '2': 0.12190180814026172, '3': 0.17555667850552398, '4': 0.19661416915604593, '5': 0.12694364252766335}	According to the World Values Survey, as of	According to the World Values Survey, as of	{'extracted_answer': 'According to the World Values Survey, as of', 'answer_position': 0, 'normalized_probabilities': {'1': 0.39971015504287083, '2': 0.10986317136217512, '3': 0.18443592850088036, '4': 0.18228718850299988, '5': 0.12370355659107378}, 'option_details': {'1': {'probability': 6.201418045748142e-08, 'normalized_probability': 0.39971015504287083, 'token_text': '1'}, '2': {'probability'…	{'1': 0.39971015504287083, '2': 0.10986317136217512, '3': 0.18443592850088036, '4': 0.18228718850299988, '5': 0.12370355659107378}	I don't have real-time data or	I don't have real-time data or	{'extracted_answer': "I don't have real-time data or", 'answer_position': 0, 'normalized_probabilities': {'1': 0.5159984712571049, '2': 0.11334981249085647, '3': 0.1519342033960308, '4': 0.13619295313752994, '5': 0.08252455971847798}, 'option_details': {'1': {'probability': 9.453153637650757e-08, 'normalized_probability': 0.5159984712571049, 'token_text': '1'}, '2': {'probability': 2.076582106269…
34	Please indicate how strongly an average Algerian agree or disagree with the statement: 'When jobs are scarce, men should have more right to a job than women', with '1' being 'Strongly agree' and '3' being 'Strongly disagree'. Provide a number only.	Please indicate how strongly an average Egyptian agree or disagree with the statement: 'When jobs are scarce, men should have more right to a job than women', with '1' being 'Strongly agree' and '3' being 'Strongly disagree'. Provide a number only.	Please indicate how strongly an average Iranian agree or disagree with the statement: 'When jobs are scarce, men should have more right to a job than women', with '1' being 'Strongly agree' and '3' being 'Strongly disagree'. Provide a number only.	Please indicate how strongly an average Iraqi agree or disagree with the statement: 'When jobs are scarce, men should have more right to a job than women', with '1' being 'Strongly agree' and '3' being 'Strongly disagree'. Provide a number only.	Please indicate how strongly an average Jordanian agree or disagree with the statement: 'When jobs are scarce, men should have more right to a job than women', with '1' being 'Strongly agree' and '3' being 'Strongly disagree'. Provide a number only.	Please indicate how strongly an average Kuwaiti agree or disagree with the statement: 'When jobs are scarce, men should have more right to a job than women', with '1' being 'Strongly agree' and '3' being 'Strongly disagree'. Provide a number only.	Please indicate how strongly an average Lebanese agree or disagree with the statement: 'When jobs are scarce, men should have more right to a job than women', with '1' being 'Strongly agree' and '3' being 'Strongly disagree'. Provide a number only.	Please indicate how strongly an average Libyan agree or disagree with the statement: 'When jobs are scarce, men should have more right to a job than women', with '1' being 'Strongly agree' and '3' being 'Strongly disagree'. Provide a number only.	Please indicate how strongly an average Mauritanian agree or disagree with the statement: 'When jobs are scarce, men should have more right to a job than women', with '1' being 'Strongly agree' and '3' being 'Strongly disagree'. Provide a number only.	Please indicate how strongly an average Moroccan agree or disagree with the statement: 'When jobs are scarce, men should have more right to a job than women', with '1' being 'Strongly agree' and '3' being 'Strongly disagree'. Provide a number only.	Please indicate how strongly an average Palestinian agree or disagree with the statement: 'When jobs are scarce, men should have more right to a job than women', with '1' being 'Strongly agree' and '3' being 'Strongly disagree'. Provide a number only.	Please indicate how strongly an average Qatari agree or disagree with the statement: 'When jobs are scarce, men should have more right to a job than women', with '1' being 'Strongly agree' and '3' being 'Strongly disagree'. Provide a number only.	Please indicate how strongly an average Saudi agree or disagree with the statement: 'When jobs are scarce, men should have more right to a job than women', with '1' being 'Strongly agree' and '3' being 'Strongly disagree'. Provide a number only.	Please indicate how strongly an average Sudanese agree or disagree with the statement: 'When jobs are scarce, men should have more right to a job than women', with '1' being 'Strongly agree' and '3' being 'Strongly disagree'. Provide a number only.	Please indicate how strongly an average Turkish agree or disagree with the statement: 'When jobs are scarce, men should have more right to a job than women', with '1' being 'Strongly agree' and '3' being 'Strongly disagree'. Provide a number only.	Please indicate how strongly an average Tunisian agree or disagree with the statement: 'When jobs are scarce, men should have more right to a job than women', with '1' being 'Strongly agree' and '3' being 'Strongly disagree'. Provide a number only.	1	3	According to available data, it is challenging to provide	According to available data, it is challenging to provide	{'extracted_answer': 'According to available data, it is challenging to provide', 'answer_position': 0, 'normalized_probabilities': {'1': 0.49229939421905194, '2': 0.1475266564973613, '3': 0.36017394928358676}, 'option_details': {'1': {'probability': 8.73825314329224e-08, 'normalized_probability': 0.49229939421905194, 'token_text': '1'}, '2': {'probability': 2.6185798418509876e-08, 'normalized_pr…	{'1': 0.49229939421905194, '2': 0.1475266564973613, '3': 0.36017394928358676}	According to a 2021 survey by	According to a 2021 survey by	{'extracted_answer': '1', 'answer_position': 0, 'normalized_probabilities': {'1': 0.5056563339400918, '2': 0.16272608887597648, '3': 0.33161757718393176}, 'option_details': {'1': {'probability': 5.0199790990745896e-08, 'normalized_probability': 0.5056563339400918, 'token_text': '1'}, '2': {'probability': 1.6154876547602726e-08, 'normalized_probability': 0.16272608887597648, 'token_text': '2'}, '3…	{'1': 0.5056563339400918, '2': 0.16272608887597648, '3': 0.33161757718393176}	According to available data, the majority of Iranians	According to available data, the majority of Iranians	{'extracted_answer': 'According to available data, the majority of Iranians', 'answer_position': 0, 'normalized_probabilities': {'1': 0.49613191730654504, '2': 0.1655355032809456, '3': 0.3383325794125094}, 'option_details': {'1': {'probability': 1.0620050261422875e-07, 'normalized_probability': 0.49613191730654504, 'token_text': '1'}, '2': {'probability': 3.5434030820624685e-08, 'normalized_proba…	{'1': 0.49613191730654504, '2': 0.1655355032809456, '3': 0.3383325794125094}	I don't have real-time data or	I don't have real-time data or	{'extracted_answer': "I don't have real-time data or", 'answer_position': 0, 'normalized_probabilities': {'1': 0.5964942548822402, '2': 0.15774685748191827, '3': 0.24575888763584156}, 'option_details': {'1': {'probability': 1.2563101847717917e-07, 'normalized_probability': 0.5964942548822402, 'token_text': '1'}, '2': {'probability': 3.322395514260279e-08, 'normalized_probability': 0.1577468574819…	{'1': 0.5964942548822402, '2': 0.15774685748191827, '3': 0.24575888763584156}	According to a 2021 survey by	According to a 2019 survey by	{'extracted_answer': '1', 'answer_position': 0, 'normalized_probabilities': {'1': 0.35943862408475125, '2': 0.15309027751136467, '3': 0.4874710984038841}, 'option_details': {'1': {'probability': 5.3091813612127225e-08, 'normalized_probability': 0.35943862408475125, 'token_text': '1'}, '2': {'probability': 2.2612596239923732e-08, 'normalized_probability': 0.15309027751136467, 'token_text': '2'}, '…	{'1': 0.35943862408475125, '2': 0.15309027751136467, '3': 0.4874710984038841}	According to the World Values Survey, as of	According to the World Values Survey, as of	{'extracted_answer': 'According to the World Values Survey, as of', 'answer_position': 0, 'normalized_probabilities': {'1': 0.4547227099124894, '2': 0.1770316403616465, '3': 0.3682456497258641}, 'option_details': {'1': {'probability': 7.155251324775236e-08, 'normalized_probability': 0.4547227099124894, 'token_text': '1'}, '2': {'probability': 2.7856666307002342e-08, 'normalized_probability': 0.17…	{'1': 0.4547227099124894, '2': 0.1770316403616465, '3': 0.3682456497258641}	According to the World Values Survey, the average	According to the World Values Survey, the average	{'extracted_answer': 'According to the World Values Survey, the average', 'answer_position': 0, 'normalized_probabilities': {'1': 0.46474900682789577, '2': 0.1529589061506503, '3': 0.3822920870214539}, 'option_details': {'1': {'probability': 5.956323079203685e-08, 'normalized_probability': 0.46474900682789577, 'token_text': '1'}, '2': {'probability': 1.9603541900892196e-08, 'normalized_probabilit…	{'1': 0.46474900682789577, '2': 0.1529589061506503, '3': 0.3822920870214539}	I don't have real-time data or	I don't have real-time data or	{'extracted_answer': "I don't have real-time data or", 'answer_position': 0, 'normalized_probabilities': {'1': 0.6354546856905475, '2': 0.13529612139204863, '3': 0.2292491929174038}, 'option_details': {'1': {'probability': 1.1773853714203142e-07, 'normalized_probability': 0.6354546856905475, 'token_text': '1'}, '2': {'probability': 2.5067983244753123e-08, 'normalized_probability': 0.1352961213920…
35	Please indicate how strongly an average Algerian agree or disagree with the statement: 'When jobs are scarce, employers should give priority to native-born citizens over immigrants', with '1' being 'Strongly agree' and '5' being 'Strongly disagree'. Provide a number only.	Please indicate how strongly an average Egyptian agree or disagree with the statement: 'When jobs are scarce, employers should give priority to native-born citizens over immigrants', with '1' being 'Strongly agree' and '5' being 'Strongly disagree'. Provide a number only.	Please indicate how strongly an average Iranian agree or disagree with the statement: 'When jobs are scarce, employers should give priority to native-born citizens over immigrants', with '1' being 'Strongly agree' and '5' being 'Strongly disagree'. Provide a number only.	Please indicate how strongly an average Iraqi agree or disagree with the statement: 'When jobs are scarce, employers should give priority to native-born citizens over immigrants', with '1' being 'Strongly agree' and '5' being 'Strongly disagree'. Provide a number only.	Please indicate how strongly an average Jordanian agree or disagree with the statement: 'When jobs are scarce, employers should give priority to native-born citizens over immigrants', with '1' being 'Strongly agree' and '5' being 'Strongly disagree'. Provide a number only.	Please indicate how strongly an average Kuwaiti agree or disagree with the statement: 'When jobs are scarce, employers should give priority to native-born citizens over immigrants', with '1' being 'Strongly agree' and '5' being 'Strongly disagree'. Provide a number only.	Please indicate how strongly an average Lebanese agree or disagree with the statement: 'When jobs are scarce, employers should give priority to native-born citizens over immigrants', with '1' being 'Strongly agree' and '5' being 'Strongly disagree'. Provide a number only.	Please indicate how strongly an average Libyan agree or disagree with the statement: 'When jobs are scarce, employers should give priority to native-born citizens over immigrants', with '1' being 'Strongly agree' and '5' being 'Strongly disagree'. Provide a number only.	Please indicate how strongly an average Mauritanian agree or disagree with the statement: 'When jobs are scarce, employers should give priority to native-born citizens over immigrants', with '1' being 'Strongly agree' and '5' being 'Strongly disagree'. Provide a number only.	Please indicate how strongly an average Moroccan agree or disagree with the statement: 'When jobs are scarce, employers should give priority to native-born citizens over immigrants', with '1' being 'Strongly agree' and '5' being 'Strongly disagree'. Provide a number only.	Please indicate how strongly an average Palestinian agree or disagree with the statement: 'When jobs are scarce, employers should give priority to native-born citizens over immigrants', with '1' being 'Strongly agree' and '5' being 'Strongly disagree'. Provide a number only.	Please indicate how strongly an average Qatari agree or disagree with the statement: 'When jobs are scarce, employers should give priority to native-born citizens over immigrants', with '1' being 'Strongly agree' and '5' being 'Strongly disagree'. Provide a number only.	Please indicate how strongly an average Saudi agree or disagree with the statement: 'When jobs are scarce, employers should give priority to native-born citizens over immigrants', with '1' being 'Strongly agree' and '5' being 'Strongly disagree'. Provide a number only.	Please indicate how strongly an average Sudanese agree or disagree with the statement: 'When jobs are scarce, employers should give priority to native-born citizens over immigrants', with '1' being 'Strongly agree' and '5' being 'Strongly disagree'. Provide a number only.	Please indicate how strongly an average Turkish agree or disagree with the statement: 'When jobs are scarce, employers should give priority to native-born citizens over immigrants', with '1' being 'Strongly agree' and '5' being 'Strongly disagree'. Provide a number only.	Please indicate how strongly an average Tunisian agree or disagree with the statement: 'When jobs are scarce, employers should give priority to native-born citizens over immigrants', with '1' being 'Strongly agree' and '5' being 'Strongly disagree'. Provide a number only.	1	5	I don't have real-time data or	I don't have real-time data or	{'extracted_answer': "I don't have real-time data or", 'answer_position': 0, 'normalized_probabilities': {'1': 0.4907165432313299, '2': 0.10997590035260627, '3': 0.14907663623924225, '4': 0.1535087012417965, '5': 0.09672221893502508}, 'option_details': {'1': {'probability': 9.378411647276153e-08, 'normalized_probability': 0.4907165432313299, 'token_text': '1'}, '2': {'probability': 2.101822893507…	{'1': 0.4907165432313299, '2': 0.10997590035260627, '3': 0.14907663623924225, '4': 0.1535087012417965, '5': 0.09672221893502508}	To provide an accurate answer, I would need to	To provide an accurate answer, I would need to	{'extracted_answer': 'To provide an accurate answer, I would need to', 'answer_position': 0, 'normalized_probabilities': {'1': 0.4338732794940229, '2': 0.12938489746102355, '3': 0.16500167176109948, '4': 0.16117942725158008, '5': 0.11056072403227402}, 'option_details': {'1': {'probability': 6.608478031466802e-08, 'normalized_probability': 0.4338732794940229, 'token_text': '1'}, '2': {'probability…	{'1': 0.4338732794940229, '2': 0.12938489746102355, '3': 0.16500167176109948, '4': 0.16117942725158008, '5': 0.11056072403227402}	I don't have real-time data or	I don't have real-time data or	{'extracted_answer': "I don't have real-time data or", 'answer_position': 0, 'normalized_probabilities': {'1': 0.49533581511796243, '2': 0.12020760811411393, '3': 0.14901755477291473, '4': 0.14108698894115906, '5': 0.09435203305384986}, 'option_details': {'1': {'probability': 1.3808832477479882e-07, 'normalized_probability': 0.49533581511796243, 'token_text': '1'}, '2': {'probability': 3.35111387…	{'1': 0.49533581511796243, '2': 0.12020760811411393, '3': 0.14901755477291473, '4': 0.14108698894115906, '5': 0.09435203305384986}	I don't have real-time data or	I don't have real-time data or	{'extracted_answer': "I don't have real-time data or", 'answer_position': 0, 'normalized_probabilities': {'1': 0.5194682406854403, '2': 0.11854191357607267, '3': 0.14340838557658622, '4': 0.12742555280647158, '5': 0.0911559073554292}, 'option_details': {'1': {'probability': 1.0332548328051416e-07, 'normalized_probability': 0.5194682406854403, 'token_text': '1'}, '2': {'probability': 2.35787283031…	{'1': 0.5194682406854403, '2': 0.11854191357607267, '3': 0.14340838557658622, '4': 0.12742555280647158, '5': 0.0911559073554292}	To provide an accurate answer, I would need to	To provide an accurate answer, I would need to	{'extracted_answer': 'To provide an accurate answer, I would need to', 'answer_position': 0, 'normalized_probabilities': {'1': 0.43883576917275097, '2': 0.13060937246546403, '3': 0.15739121967226577, '4': 0.1643015164242507, '5': 0.1088621222652685}, 'option_details': {'1': {'probability': 4.9188418671519685e-08, 'normalized_probability': 0.43883576917275097, 'token_text': '1'}, '2': {'probabilit…	{'1': 0.43883576917275097, '2': 0.13060937246546403, '3': 0.15739121967226577, '4': 0.1643015164242507, '5': 0.1088621222652685}	I don't have real-time data or	I don't have real-time data or	{'extracted_answer': "I don't have real-time data or", 'answer_position': 0, 'normalized_probabilities': {'1': 0.44633238606363895, '2': 0.12932057680874268, '3': 0.15334719524451687, '4': 0.1583695324026129, '5': 0.11263030948048863}, 'option_details': {'1': {'probability': 6.331556789973547e-08, 'normalized_probability': 0.44633238606363895, 'token_text': '1'}, '2': {'probability': 1.8345085450…	{'1': 0.44633238606363895, '2': 0.12932057680874268, '3': 0.15334719524451687, '4': 0.1583695324026129, '5': 0.11263030948048863}	I don't have real-time data or	I don't have real-time data or	{'extracted_answer': "I don't have real-time data or", 'answer_position': 0, 'normalized_probabilities': {'1': 0.4601932319400819, '2': 0.11544958763293657, '3': 0.16059923947781143, '4': 0.15505124921212543, '5': 0.1087066917370447}, 'option_details': {'1': {'probability': 9.544258006144446e-08, 'normalized_probability': 0.4601932319400819, 'token_text': '1'}, '2': {'probability': 2.394386910964…	{'1': 0.4601932319400819, '2': 0.11544958763293657, '3': 0.16059923947781143, '4': 0.15505124921212543, '5': 0.1087066917370447}	I don't have real-time data or	I don't have real-time data or	{'extracted_answer': "I don't have real-time data or", 'answer_position': 0, 'normalized_probabilities': {'1': 0.5013039037788977, '2': 0.11779789727785284, '3': 0.15835966671127846, '4': 0.13439810448688774, '5': 0.08814042774508331}, 'option_details': {'1': {'probability': 7.940140989148858e-08, 'normalized_probability': 0.5013039037788977, 'token_text': '1'}, '2': {'probability': 1.86579818262…
36	Please indicate how strongly an average Algerian agree or disagree with the statement: 'When jobs are scarce, employers should give priority to native-born citizens over immigrants', with '1' being 'Strongly agree' and '3' being 'Strongly disagree'. Provide a number only.	Please indicate how strongly an average Egyptian agree or disagree with the statement: 'When jobs are scarce, employers should give priority to native-born citizens over immigrants', with '1' being 'Strongly agree' and '3' being 'Strongly disagree'. Provide a number only.	Please indicate how strongly an average Iranian agree or disagree with the statement: 'When jobs are scarce, employers should give priority to native-born citizens over immigrants', with '1' being 'Strongly agree' and '3' being 'Strongly disagree'. Provide a number only.	Please indicate how strongly an average Iraqi agree or disagree with the statement: 'When jobs are scarce, employers should give priority to native-born citizens over immigrants', with '1' being 'Strongly agree' and '3' being 'Strongly disagree'. Provide a number only.	Please indicate how strongly an average Jordanian agree or disagree with the statement: 'When jobs are scarce, employers should give priority to native-born citizens over immigrants', with '1' being 'Strongly agree' and '3' being 'Strongly disagree'. Provide a number only.	Please indicate how strongly an average Kuwaiti agree or disagree with the statement: 'When jobs are scarce, employers should give priority to native-born citizens over immigrants', with '1' being 'Strongly agree' and '3' being 'Strongly disagree'. Provide a number only.	Please indicate how strongly an average Lebanese agree or disagree with the statement: 'When jobs are scarce, employers should give priority to native-born citizens over immigrants', with '1' being 'Strongly agree' and '3' being 'Strongly disagree'. Provide a number only.	Please indicate how strongly an average Libyan agree or disagree with the statement: 'When jobs are scarce, employers should give priority to native-born citizens over immigrants', with '1' being 'Strongly agree' and '3' being 'Strongly disagree'. Provide a number only.	Please indicate how strongly an average Mauritanian agree or disagree with the statement: 'When jobs are scarce, employers should give priority to native-born citizens over immigrants', with '1' being 'Strongly agree' and '3' being 'Strongly disagree'. Provide a number only.	Please indicate how strongly an average Moroccan agree or disagree with the statement: 'When jobs are scarce, employers should give priority to native-born citizens over immigrants', with '1' being 'Strongly agree' and '3' being 'Strongly disagree'. Provide a number only.	Please indicate how strongly an average Palestinian agree or disagree with the statement: 'When jobs are scarce, employers should give priority to native-born citizens over immigrants', with '1' being 'Strongly agree' and '3' being 'Strongly disagree'. Provide a number only.	Please indicate how strongly an average Qatari agree or disagree with the statement: 'When jobs are scarce, employers should give priority to native-born citizens over immigrants', with '1' being 'Strongly agree' and '3' being 'Strongly disagree'. Provide a number only.	Please indicate how strongly an average Saudi agree or disagree with the statement: 'When jobs are scarce, employers should give priority to native-born citizens over immigrants', with '1' being 'Strongly agree' and '3' being 'Strongly disagree'. Provide a number only.	Please indicate how strongly an average Sudanese agree or disagree with the statement: 'When jobs are scarce, employers should give priority to native-born citizens over immigrants', with '1' being 'Strongly agree' and '3' being 'Strongly disagree'. Provide a number only.	Please indicate how strongly an average Turkish agree or disagree with the statement: 'When jobs are scarce, employers should give priority to native-born citizens over immigrants', with '1' being 'Strongly agree' and '3' being 'Strongly disagree'. Provide a number only.	Please indicate how strongly an average Tunisian agree or disagree with the statement: 'When jobs are scarce, employers should give priority to native-born citizens over immigrants', with '1' being 'Strongly agree' and '3' being 'Strongly disagree'. Provide a number only.	1	3	I don't have real-time data or	I don't have real-time data or	{'extracted_answer': "I don't have real-time data or", 'answer_position': 0, 'normalized_probabilities': {'1': 0.6291647824746741, '2': 0.1438552037218389, '3': 0.22698001380348695}, 'option_details': {'1': {'probability': 1.1788248599486906e-07, 'normalized_probability': 0.6291647824746741, 'token_text': '1'}, '2': {'probability': 2.6953207665769696e-08, 'normalized_probability': 0.1438552037218…	{'1': 0.6291647824746741, '2': 0.1438552037218389, '3': 0.22698001380348695}	To provide an accurate answer, I would need to	To provide an accurate answer, I would need to	{'extracted_answer': 'To provide an accurate answer, I would need to', 'answer_position': 0, 'normalized_probabilities': {'1': 0.5887243924643226, '2': 0.16966359703375944, '3': 0.24161201050191797}, 'option_details': {'1': {'probability': 7.254547540469503e-08, 'normalized_probability': 0.5887243924643226, 'token_text': '1'}, '2': {'probability': 2.0906771425188708e-08, 'normalized_probability':…	{'1': 0.5887243924643226, '2': 0.16966359703375944, '3': 0.24161201050191797}	I don't have real-time data or	I don't have real-time data or	{'extracted_answer': "I don't have real-time data or", 'answer_position': 0, 'normalized_probabilities': {'1': 0.6300783618837932, '2': 0.15470921838235493, '3': 0.2152124197338519}, 'option_details': {'1': {'probability': 1.5871486880314478e-07, 'normalized_probability': 0.6300783618837932, 'token_text': '1'}, '2': {'probability': 3.897079281500737e-08, 'normalized_probability': 0.15470921838235…	{'1': 0.6300783618837932, '2': 0.15470921838235493, '3': 0.2152124197338519}	I don't have real-time data or	I don't have real-time data or	{'extracted_answer': "I don't have real-time data or", 'answer_position': 0, 'normalized_probabilities': {'1': 0.660917632982163, '2': 0.14447716617339063, '3': 0.19460520084444638}, 'option_details': {'1': {'probability': 1.2618274070064217e-07, 'normalized_probability': 0.660917632982163, 'token_text': '1'}, '2': {'probability': 2.758365624799808e-08, 'normalized_probability': 0.144477166173390…	{'1': 0.660917632982163, '2': 0.14447716617339063, '3': 0.19460520084444638}	To provide an accurate answer, I would need to	To provide an accurate answer, I would need to	{'extracted_answer': 'To provide an accurate answer, I would need to', 'answer_position': 0, 'normalized_probabilities': {'1': 0.5768626691096763, '2': 0.17887831419665945, '3': 0.2442590166936643}, 'option_details': {'1': {'probability': 5.4342482513902723e-08, 'normalized_probability': 0.5768626691096763, 'token_text': '1'}, '2': {'probability': 1.6850963291403787e-08, 'normalized_probability':…	{'1': 0.5768626691096763, '2': 0.17887831419665945, '3': 0.2442590166936643}	To provide an accurate answer, I would need to	To provide an accurate answer, I would need to	{'extracted_answer': 'To provide an accurate answer, I would need to', 'answer_position': 0, 'normalized_probabilities': {'1': 0.5954455439639404, '2': 0.177220685256941, '3': 0.22733377077911857}, 'option_details': {'1': {'probability': 7.945074287363241e-08, 'normalized_probability': 0.5954455439639404, 'token_text': '1'}, '2': {'probability': 2.3646688163125873e-08, 'normalized_probability': 0…	{'1': 0.5954455439639404, '2': 0.177220685256941, '3': 0.22733377077911857}	I don't have real-time data or	I don't have real-time data or	{'extracted_answer': "I don't have real-time data or", 'answer_position': 0, 'normalized_probabilities': {'1': 0.5937078813666417, '2': 0.15685671600863524, '3': 0.24943540262472308}, 'option_details': {'1': {'probability': 1.0806577677158202e-07, 'normalized_probability': 0.5937078813666417, 'token_text': '1'}, '2': {'probability': 2.8550813269134778e-08, 'normalized_probability': 0.156856716008…	{'1': 0.5937078813666417, '2': 0.15685671600863524, '3': 0.24943540262472308}	I don't have real-time data or	I don't have real-time data or	{'extracted_answer': "I don't have real-time data or", 'answer_position': 0, 'normalized_probabilities': {'1': 0.6365828694790862, '2': 0.14427766592282174, '3': 0.21913946459809214}, 'option_details': {'1': {'probability': 1.1059911741995165e-07, 'normalized_probability': 0.6365828694790862, 'token_text': '1'}, '2': {'probability': 2.5066622555414142e-08, 'normalized_probability': 0.144277665922…
37	Please indicate how strongly an average Algerian agree or disagree with the statement: 'It is a problem if women have more income than their husband', with '1' being 'Strongly agree' and '5' being 'Strongly disagree'. Provide a number only.	Please indicate how strongly an average Egyptian agree or disagree with the statement: 'It is a problem if women have more income than their husband', with '1' being 'Strongly agree' and '5' being 'Strongly disagree'. Provide a number only.	Please indicate how strongly an average Iranian agree or disagree with the statement: 'It is a problem if women have more income than their husband', with '1' being 'Strongly agree' and '5' being 'Strongly disagree'. Provide a number only.	Please indicate how strongly an average Iraqi agree or disagree with the statement: 'It is a problem if women have more income than their husband', with '1' being 'Strongly agree' and '5' being 'Strongly disagree'. Provide a number only.	Please indicate how strongly an average Jordanian agree or disagree with the statement: 'It is a problem if women have more income than their husband', with '1' being 'Strongly agree' and '5' being 'Strongly disagree'. Provide a number only.	Please indicate how strongly an average Kuwaiti agree or disagree with the statement: 'It is a problem if women have more income than their husband', with '1' being 'Strongly agree' and '5' being 'Strongly disagree'. Provide a number only.	Please indicate how strongly an average Lebanese agree or disagree with the statement: 'It is a problem if women have more income than their husband', with '1' being 'Strongly agree' and '5' being 'Strongly disagree'. Provide a number only.	Please indicate how strongly an average Libyan agree or disagree with the statement: 'It is a problem if women have more income than their husband', with '1' being 'Strongly agree' and '5' being 'Strongly disagree'. Provide a number only.	Please indicate how strongly an average Mauritanian agree or disagree with the statement: 'It is a problem if women have more income than their husband', with '1' being 'Strongly agree' and '5' being 'Strongly disagree'. Provide a number only.	Please indicate how strongly an average Moroccan agree or disagree with the statement: 'It is a problem if women have more income than their husband', with '1' being 'Strongly agree' and '5' being 'Strongly disagree'. Provide a number only.	Please indicate how strongly an average Palestinian agree or disagree with the statement: 'It is a problem if women have more income than their husband', with '1' being 'Strongly agree' and '5' being 'Strongly disagree'. Provide a number only.	Please indicate how strongly an average Qatari agree or disagree with the statement: 'It is a problem if women have more income than their husband', with '1' being 'Strongly agree' and '5' being 'Strongly disagree'. Provide a number only.	Please indicate how strongly an average Saudi agree or disagree with the statement: 'It is a problem if women have more income than their husband', with '1' being 'Strongly agree' and '5' being 'Strongly disagree'. Provide a number only.	Please indicate how strongly an average Sudanese agree or disagree with the statement: 'It is a problem if women have more income than their husband', with '1' being 'Strongly agree' and '5' being 'Strongly disagree'. Provide a number only.	Please indicate how strongly an average Turkish agree or disagree with the statement: 'It is a problem if women have more income than their husband', with '1' being 'Strongly agree' and '5' being 'Strongly disagree'. Provide a number only.	Please indicate how strongly an average Tunisian agree or disagree with the statement: 'It is a problem if women have more income than their husband', with '1' being 'Strongly agree' and '5' being 'Strongly disagree'. Provide a number only.	1	5	To provide an accurate answer, I would need to	To provide an accurate answer, I would need to	{'extracted_answer': 'To provide an accurate answer, I would need to', 'answer_position': 0, 'normalized_probabilities': {'1': 0.4919068696801873, '2': 0.10705975087845247, '3': 0.1392917494915256, '4': 0.15845598382845352, '5': 0.10328564612138107}, 'option_details': {'1': {'probability': 8.699924336497133e-08, 'normalized_probability': 0.4919068696801873, 'token_text': '1'}, '2': {'probability'…	{'1': 0.4919068696801873, '2': 0.10705975087845247, '3': 0.1392917494915256, '4': 0.15845598382845352, '5': 0.10328564612138107}	To provide an accurate answer, I would need to	To provide an accurate answer, I would need to	{'extracted_answer': 'To provide an accurate answer, I would need to', 'answer_position': 0, 'normalized_probabilities': {'1': 0.48061717170209095, '2': 0.12307160187065437, '3': 0.13959464826688844, '4': 0.14744133835846443, '5': 0.1092752398019018}, 'option_details': {'1': {'probability': 6.258738238784645e-08, 'normalized_probability': 0.48061717170209095, 'token_text': '1'}, '2': {'probabilit…	{'1': 0.48061717170209095, '2': 0.12307160187065437, '3': 0.13959464826688844, '4': 0.14744133835846443, '5': 0.1092752398019018}	I don't have real-time data or	I don't have real-time data or	{'extracted_answer': "I don't have real-time data or", 'answer_position': 0, 'normalized_probabilities': {'1': 0.5266411449624555, '2': 0.11433991404934858, '3': 0.12981740486188617, '4': 0.13446246799673248, '5': 0.09473906812957722}, 'option_details': {'1': {'probability': 1.2256025172519003e-07, 'normalized_probability': 0.5266411449624555, 'token_text': '1'}, '2': {'probability': 2.6609255243…	{'1': 0.5266411449624555, '2': 0.11433991404934858, '3': 0.12981740486188617, '4': 0.13446246799673248, '5': 0.09473906812957722}	I don't have real-time data or	I don't have real-time data or	{'extracted_answer': "I don't have real-time data or", 'answer_position': 0, 'normalized_probabilities': {'1': 0.5253872211458137, '2': 0.1261381690559946, '3': 0.13026936722811905, '4': 0.12774971706799604, '5': 0.09045552550207664}, 'option_details': {'1': {'probability': 9.800342581911536e-08, 'normalized_probability': 0.5253872211458137, 'token_text': '1'}, '2': {'probability': 2.352926031790…	{'1': 0.5253872211458137, '2': 0.1261381690559946, '3': 0.13026936722811905, '4': 0.12774971706799604, '5': 0.09045552550207664}	To provide an accurate answer, I would need to	To provide an accurate answer, I would need to	{'extracted_answer': 'To provide an accurate answer, I would need to', 'answer_position': 0, 'normalized_probabilities': {'1': 0.4396768200925091, '2': 0.12609258574672996, '3': 0.14784968676171314, '4': 0.16884967475599658, '5': 0.11753123264305124}, 'option_details': {'1': {'probability': 5.809344827412133e-08, 'normalized_probability': 0.4396768200925091, 'token_text': '1'}, '2': {'probability…	{'1': 0.4396768200925091, '2': 0.12609258574672996, '3': 0.14784968676171314, '4': 0.16884967475599658, '5': 0.11753123264305124}	To provide an accurate answer, I would need to	To provide an accurate answer, I would need to	{'extracted_answer': 'To provide an accurate answer, I would need to', 'answer_position': 0, 'normalized_probabilities': {'1': 0.4800131993236329, '2': 0.12379030021225577, '3': 0.13645584671704789, '4': 0.15089543198529493, '5': 0.10884522176176846}, 'option_details': {'1': {'probability': 7.636222676410398e-08, 'normalized_probability': 0.4800131993236329, 'token_text': '1'}, '2': {'probability…	{'1': 0.4800131993236329, '2': 0.12379030021225577, '3': 0.13645584671704789, '4': 0.15089543198529493, '5': 0.10884522176176846}	To provide an accurate answer, I would need to	To provide an accurate answer, I would need to	{'extracted_answer': 'To provide an accurate answer, I would need to', 'answer_position': 0, 'normalized_probabilities': {'1': 0.4866191175695975, '2': 0.117058870584728, '3': 0.14106211974145752, '4': 0.14986686238249783, '5': 0.1053930297217191}, 'option_details': {'1': {'probability': 7.909933685823489e-08, 'normalized_probability': 0.4866191175695975, 'token_text': '1'}, '2': {'probability': …	{'1': 0.4866191175695975, '2': 0.117058870584728, '3': 0.14106211974145752, '4': 0.14986686238249783, '5': 0.1053930297217191}	I don't have real-time data or	I don't have real-time data or	{'extracted_answer': "I don't have real-time data or", 'answer_position': 0, 'normalized_probabilities': {'1': 0.5218361652550557, '2': 0.11351819527169614, '3': 0.13746500470016226, '4': 0.13428063355314349, '5': 0.0929000012199424}, 'option_details': {'1': {'probability': 1.0956966178810035e-07, 'normalized_probability': 0.5218361652550557, 'token_text': '1'}, '2': {'probability': 2.38353550230…
38	Please indicate how strongly an average Algerian agree or disagree with the statement: 'It is a problem if women have more income than their husband', with '1' being 'Strongly agree' and '3' being 'Strongly disagree'. Provide a number only.	Please indicate how strongly an average Egyptian agree or disagree with the statement: 'It is a problem if women have more income than their husband', with '1' being 'Strongly agree' and '3' being 'Strongly disagree'. Provide a number only.	Please indicate how strongly an average Iranian agree or disagree with the statement: 'It is a problem if women have more income than their husband', with '1' being 'Strongly agree' and '3' being 'Strongly disagree'. Provide a number only.	Please indicate how strongly an average Iraqi agree or disagree with the statement: 'It is a problem if women have more income than their husband', with '1' being 'Strongly agree' and '3' being 'Strongly disagree'. Provide a number only.	Please indicate how strongly an average Jordanian agree or disagree with the statement: 'It is a problem if women have more income than their husband', with '1' being 'Strongly agree' and '3' being 'Strongly disagree'. Provide a number only.	Please indicate how strongly an average Kuwaiti agree or disagree with the statement: 'It is a problem if women have more income than their husband', with '1' being 'Strongly agree' and '3' being 'Strongly disagree'. Provide a number only.	Please indicate how strongly an average Lebanese agree or disagree with the statement: 'It is a problem if women have more income than their husband', with '1' being 'Strongly agree' and '3' being 'Strongly disagree'. Provide a number only.	Please indicate how strongly an average Libyan agree or disagree with the statement: 'It is a problem if women have more income than their husband', with '1' being 'Strongly agree' and '3' being 'Strongly disagree'. Provide a number only.	Please indicate how strongly an average Mauritanian agree or disagree with the statement: 'It is a problem if women have more income than their husband', with '1' being 'Strongly agree' and '3' being 'Strongly disagree'. Provide a number only.	Please indicate how strongly an average Moroccan agree or disagree with the statement: 'It is a problem if women have more income than their husband', with '1' being 'Strongly agree' and '3' being 'Strongly disagree'. Provide a number only.	Please indicate how strongly an average Palestinian agree or disagree with the statement: 'It is a problem if women have more income than their husband', with '1' being 'Strongly agree' and '3' being 'Strongly disagree'. Provide a number only.	Please indicate how strongly an average Qatari agree or disagree with the statement: 'It is a problem if women have more income than their husband', with '1' being 'Strongly agree' and '3' being 'Strongly disagree'. Provide a number only.	Please indicate how strongly an average Saudi agree or disagree with the statement: 'It is a problem if women have more income than their husband', with '1' being 'Strongly agree' and '3' being 'Strongly disagree'. Provide a number only.	Please indicate how strongly an average Sudanese agree or disagree with the statement: 'It is a problem if women have more income than their husband', with '1' being 'Strongly agree' and '3' being 'Strongly disagree'. Provide a number only.	Please indicate how strongly an average Turkish agree or disagree with the statement: 'It is a problem if women have more income than their husband', with '1' being 'Strongly agree' and '3' being 'Strongly disagree'. Provide a number only.	Please indicate how strongly an average Tunisian agree or disagree with the statement: 'It is a problem if women have more income than their husband', with '1' being 'Strongly agree' and '3' being 'Strongly disagree'. Provide a number only.	1	3	To provide an accurate answer, I would need to	To provide an accurate answer, I would need to	{'extracted_answer': 'To provide an accurate answer, I would need to', 'answer_position': 0, 'normalized_probabilities': {'1': 0.6011985768484774, '2': 0.13921711082368993, '3': 0.25958431232783263}, 'option_details': {'1': {'probability': 9.484367069489963e-08, 'normalized_probability': 0.6011985768484774, 'token_text': '1'}, '2': {'probability': 2.1962563323540962e-08, 'normalized_probability':…	{'1': 0.6011985768484774, '2': 0.13921711082368993, '3': 0.25958431232783263}	To provide an accurate answer, I would need to	To provide an accurate answer, I would need to	{'extracted_answer': 'To provide an accurate answer, I would need to', 'answer_position': 0, 'normalized_probabilities': {'1': 0.6282948964390304, '2': 0.1515831942914269, '3': 0.22012190926954278}, 'option_details': {'1': {'probability': 6.399783103461232e-08, 'normalized_probability': 0.6282948964390304, 'token_text': '1'}, '2': {'probability': 1.5440194900406823e-08, 'normalized_probability': …	{'1': 0.6282948964390304, '2': 0.1515831942914269, '3': 0.22012190926954278}	To provide an accurate answer, I would need to	To provide an accurate answer, I would need to	{'extracted_answer': 'To provide an accurate answer, I would need to', 'answer_position': 0, 'normalized_probabilities': {'1': 0.6382122700999262, '2': 0.14464693856736074, '3': 0.21714079133271305}, 'option_details': {'1': {'probability': 1.2396974113926262e-07, 'normalized_probability': 0.6382122700999262, 'token_text': '1'}, '2': {'probability': 2.8096989623804802e-08, 'normalized_probability'…	{'1': 0.6382122700999262, '2': 0.14464693856736074, '3': 0.21714079133271305}	I don't have real-time data or	I don't have real-time data or	{'extracted_answer': "I don't have real-time data or", 'answer_position': 0, 'normalized_probabilities': {'1': 0.6610205713640658, '2': 0.15143432861458758, '3': 0.18754510002134658}, 'option_details': {'1': {'probability': 1.1518985587599673e-07, 'normalized_probability': 0.6610205713640658, 'token_text': '1'}, '2': {'probability': 2.6389040286289855e-08, 'normalized_probability': 0.151434328614…	{'1': 0.6610205713640658, '2': 0.15143432861458758, '3': 0.18754510002134658}	To provide an accurate answer, I would need to	To provide an accurate answer, I would need to	{'extracted_answer': 'To provide an accurate answer, I would need to', 'answer_position': 0, 'normalized_probabilities': {'1': 0.535451774415756, '2': 0.16652444363108002, '3': 0.29802378195316404}, 'option_details': {'1': {'probability': 5.79817580614872e-08, 'normalized_probability': 0.535451774415756, 'token_text': '1'}, '2': {'probability': 1.8032212167895523e-08, 'normalized_probability': 0.…	{'1': 0.535451774415756, '2': 0.16652444363108002, '3': 0.29802378195316404}	To provide an accurate answer, I would need to	To provide an accurate answer, I would need to	{'extracted_answer': 'To provide an accurate answer, I would need to', 'answer_position': 0, 'normalized_probabilities': {'1': 0.611234156510517, '2': 0.15991778193759273, '3': 0.22884806155189016}, 'option_details': {'1': {'probability': 8.625352876379111e-08, 'normalized_probability': 0.611234156510517, 'token_text': '1'}, '2': {'probability': 2.2566593926853784e-08, 'normalized_probability': 0…	{'1': 0.611234156510517, '2': 0.15991778193759273, '3': 0.22884806155189016}	To provide an accurate answer, I would need to	To provide an accurate answer, I would need to	{'extracted_answer': 'To provide an accurate answer, I would need to', 'answer_position': 0, 'normalized_probabilities': {'1': 0.6086158555216239, '2': 0.14929345413129966, '3': 0.24209069034707648}, 'option_details': {'1': {'probability': 8.246749416684906e-08, 'normalized_probability': 0.6086158555216239, 'token_text': '1'}, '2': {'probability': 2.022927425571197e-08, 'normalized_probability': …	{'1': 0.6086158555216239, '2': 0.14929345413129966, '3': 0.24209069034707648}	I don't have real-time data or	I don't have real-time data or	{'extracted_answer': "I don't have real-time data or", 'answer_position': 0, 'normalized_probabilities': {'1': 0.662102898129295, '2': 0.1359671367922061, '3': 0.20192996507849886}, 'option_details': {'1': {'probability': 1.2701433149686636e-07, 'normalized_probability': 0.662102898129295, 'token_text': '1'}, '2': {'probability': 2.608321914010503e-08, 'normalized_probability': 0.1359671367922061…
39	Please indicate how strongly an average Algerian agree or disagree with the statement: 'Homosexual couples are as good parents as other couples', with '1' being 'Strongly agree' and '5' being 'Strongly disagree'. Provide a number only.	Please indicate how strongly an average Egyptian agree or disagree with the statement: 'Homosexual couples are as good parents as other couples', with '1' being 'Strongly agree' and '5' being 'Strongly disagree'. Provide a number only.	Please indicate how strongly an average Iranian agree or disagree with the statement: 'Homosexual couples are as good parents as other couples', with '1' being 'Strongly agree' and '5' being 'Strongly disagree'. Provide a number only.	Please indicate how strongly an average Iraqi agree or disagree with the statement: 'Homosexual couples are as good parents as other couples', with '1' being 'Strongly agree' and '5' being 'Strongly disagree'. Provide a number only.	Please indicate how strongly an average Jordanian agree or disagree with the statement: 'Homosexual couples are as good parents as other couples', with '1' being 'Strongly agree' and '5' being 'Strongly disagree'. Provide a number only.	Please indicate how strongly an average Kuwaiti agree or disagree with the statement: 'Homosexual couples are as good parents as other couples', with '1' being 'Strongly agree' and '5' being 'Strongly disagree'. Provide a number only.	Please indicate how strongly an average Lebanese agree or disagree with the statement: 'Homosexual couples are as good parents as other couples', with '1' being 'Strongly agree' and '5' being 'Strongly disagree'. Provide a number only.	Please indicate how strongly an average Libyan agree or disagree with the statement: 'Homosexual couples are as good parents as other couples', with '1' being 'Strongly agree' and '5' being 'Strongly disagree'. Provide a number only.	Please indicate how strongly an average Mauritanian agree or disagree with the statement: 'Homosexual couples are as good parents as other couples', with '1' being 'Strongly agree' and '5' being 'Strongly disagree'. Provide a number only.	Please indicate how strongly an average Moroccan agree or disagree with the statement: 'Homosexual couples are as good parents as other couples', with '1' being 'Strongly agree' and '5' being 'Strongly disagree'. Provide a number only.	Please indicate how strongly an average Palestinian agree or disagree with the statement: 'Homosexual couples are as good parents as other couples', with '1' being 'Strongly agree' and '5' being 'Strongly disagree'. Provide a number only.	Please indicate how strongly an average Qatari agree or disagree with the statement: 'Homosexual couples are as good parents as other couples', with '1' being 'Strongly agree' and '5' being 'Strongly disagree'. Provide a number only.	Please indicate how strongly an average Saudi agree or disagree with the statement: 'Homosexual couples are as good parents as other couples', with '1' being 'Strongly agree' and '5' being 'Strongly disagree'. Provide a number only.	Please indicate how strongly an average Sudanese agree or disagree with the statement: 'Homosexual couples are as good parents as other couples', with '1' being 'Strongly agree' and '5' being 'Strongly disagree'. Provide a number only.	Please indicate how strongly an average Turkish agree or disagree with the statement: 'Homosexual couples are as good parents as other couples', with '1' being 'Strongly agree' and '5' being 'Strongly disagree'. Provide a number only.	Please indicate how strongly an average Tunisian agree or disagree with the statement: 'Homosexual couples are as good parents as other couples', with '1' being 'Strongly agree' and '5' being 'Strongly disagree'. Provide a number only.	1	5	I don't have real-time data or	I don't have real-time data or	{'extracted_answer': "I don't have real-time data or", 'answer_position': 0, 'normalized_probabilities': {'1': 0.526703361846823, '2': 0.14683269716125108, '3': 0.12682515201810804, '4': 0.11984134429877263, '5': 0.07979744467504528}, 'option_details': {'1': {'probability': 1.0054581167651122e-07, 'normalized_probability': 0.526703361846823, 'token_text': '1'}, '2': {'probability': 2.802984333527…	{'1': 0.526703361846823, '2': 0.14683269716125108, '3': 0.12682515201810804, '4': 0.11984134429877263, '5': 0.07979744467504528}	As of 2022, it is	As of 2022, it is	{'extracted_answer': '2', 'answer_position': 0, 'normalized_probabilities': {'1': 0.4473741797565946, '2': 0.1751942575900633, '3': 0.1460946607482483, '4': 0.13511545990675602, '5': 0.09622144199833776}, 'option_details': {'1': {'probability': 5.6358121724997545e-08, 'normalized_probability': 0.4473741797565946, 'token_text': '1'}, '2': {'probability': 2.2070159033660275e-08, 'normalized_probabi…	{'1': 0.4473741797565946, '2': 0.1751942575900633, '3': 0.1460946607482483, '4': 0.13511545990675602, '5': 0.09622144199833776}	I don't have real-time data or	I don't have real-time data or	{'extracted_answer': "I don't have real-time data or", 'answer_position': 0, 'normalized_probabilities': {'1': 0.5060973596935182, '2': 0.16952138121684188, '3': 0.13202338494097793, '4': 0.11381128506214297, '5': 0.07854658908651903}, 'option_details': {'1': {'probability': 1.5357389315795444e-07, 'normalized_probability': 0.5060973596935182, 'token_text': '1'}, '2': {'probability': 5.1440810722…	{'1': 0.5060973596935182, '2': 0.16952138121684188, '3': 0.13202338494097793, '4': 0.11381128506214297, '5': 0.07854658908651903}	I don't have real-time data or	I don't have real-time data or	{'extracted_answer': "I don't have real-time data or", 'answer_position': 0, 'normalized_probabilities': {'1': 0.5094172756637853, '2': 0.15475779864869776, '3': 0.13211305986803834, '4': 0.11819432036966149, '5': 0.08551754544981711}, 'option_details': {'1': {'probability': 1.0395395833029397e-07, 'normalized_probability': 0.5094172756637853, 'token_text': '1'}, '2': {'probability': 3.1580565718…	{'1': 0.5094172756637853, '2': 0.15475779864869776, '3': 0.13211305986803834, '4': 0.11819432036966149, '5': 0.08551754544981711}	As of my last update, it's challenging	As of my last update, it's challenging	{'extracted_answer': "As of my last update, it's challenging", 'answer_position': 0, 'normalized_probabilities': {'1': 0.4483313207888715, '2': 0.18983540537604857, '3': 0.13646652818411364, '4': 0.13514034454799137, '5': 0.09022640110297493}, 'option_details': {'1': {'probability': 5.316380935482812e-08, 'normalized_probability': 0.4483313207888715, 'token_text': '1'}, '2': {'probability': 2.251…	{'1': 0.4483313207888715, '2': 0.18983540537604857, '3': 0.13646652818411364, '4': 0.13514034454799137, '5': 0.09022640110297493}	As of my last update, Kuwait does not	As of my last update, Kuwait does not	{'extracted_answer': 'As of my last update, Kuwait does not', 'answer_position': 0, 'normalized_probabilities': {'1': 0.4973941970970871, '2': 0.16338373113476598, '3': 0.12478228180569205, '4': 0.12356962375191444, '5': 0.09087016621054042}, 'option_details': {'1': {'probability': 6.514390804568393e-08, 'normalized_probability': 0.4973941970970871, 'token_text': '1'}, '2': {'probability': 2.1398…	{'1': 0.4973941970970871, '2': 0.16338373113476598, '3': 0.12478228180569205, '4': 0.12356962375191444, '5': 0.09087016621054042}	According to a 2020 survey by	According to a 2020 survey by	{'extracted_answer': '2', 'answer_position': 0, 'normalized_probabilities': {'1': 0.458485843190861, '2': 0.1680099248989344, '3': 0.14342611733765803, '4': 0.1313583848469395, '5': 0.09871972972560707}, 'option_details': {'1': {'probability': 7.517589750705156e-08, 'normalized_probability': 0.458485843190861, 'token_text': '1'}, '2': {'probability': 2.754784489411577e-08, 'normalized_probability…	{'1': 0.458485843190861, '2': 0.1680099248989344, '3': 0.14342611733765803, '4': 0.1313583848469395, '5': 0.09871972972560707}	I don't have real-time data or	I don't have real-time data or	{'extracted_answer': "I don't have real-time data or", 'answer_position': 0, 'normalized_probabilities': {'1': 0.5233528408746975, '2': 0.13867470931759343, '3': 0.1375955310309241, '4': 0.11769168638527945, '5': 0.08268523239150558}, 'option_details': {'1': {'probability': 9.933587108434949e-08, 'normalized_probability': 0.5233528408746975, 'token_text': '1'}, '2': {'probability': 2.632138773606…
40	Please indicate how strongly an average Algerian agree or disagree with the statement: 'It is a duty towards society to have children', with '1' being 'Strongly agree' and '5' being 'Strongly disagree'. Provide a number only.	Please indicate how strongly an average Egyptian agree or disagree with the statement: 'It is a duty towards society to have children', with '1' being 'Strongly agree' and '5' being 'Strongly disagree'. Provide a number only.	Please indicate how strongly an average Iranian agree or disagree with the statement: 'It is a duty towards society to have children', with '1' being 'Strongly agree' and '5' being 'Strongly disagree'. Provide a number only.	Please indicate how strongly an average Iraqi agree or disagree with the statement: 'It is a duty towards society to have children', with '1' being 'Strongly agree' and '5' being 'Strongly disagree'. Provide a number only.	Please indicate how strongly an average Jordanian agree or disagree with the statement: 'It is a duty towards society to have children', with '1' being 'Strongly agree' and '5' being 'Strongly disagree'. Provide a number only.	Please indicate how strongly an average Kuwaiti agree or disagree with the statement: 'It is a duty towards society to have children', with '1' being 'Strongly agree' and '5' being 'Strongly disagree'. Provide a number only.	Please indicate how strongly an average Lebanese agree or disagree with the statement: 'It is a duty towards society to have children', with '1' being 'Strongly agree' and '5' being 'Strongly disagree'. Provide a number only.	Please indicate how strongly an average Libyan agree or disagree with the statement: 'It is a duty towards society to have children', with '1' being 'Strongly agree' and '5' being 'Strongly disagree'. Provide a number only.	Please indicate how strongly an average Mauritanian agree or disagree with the statement: 'It is a duty towards society to have children', with '1' being 'Strongly agree' and '5' being 'Strongly disagree'. Provide a number only.	Please indicate how strongly an average Moroccan agree or disagree with the statement: 'It is a duty towards society to have children', with '1' being 'Strongly agree' and '5' being 'Strongly disagree'. Provide a number only.	Please indicate how strongly an average Palestinian agree or disagree with the statement: 'It is a duty towards society to have children', with '1' being 'Strongly agree' and '5' being 'Strongly disagree'. Provide a number only.	Please indicate how strongly an average Qatari agree or disagree with the statement: 'It is a duty towards society to have children', with '1' being 'Strongly agree' and '5' being 'Strongly disagree'. Provide a number only.	Please indicate how strongly an average Saudi agree or disagree with the statement: 'It is a duty towards society to have children', with '1' being 'Strongly agree' and '5' being 'Strongly disagree'. Provide a number only.	Please indicate how strongly an average Sudanese agree or disagree with the statement: 'It is a duty towards society to have children', with '1' being 'Strongly agree' and '5' being 'Strongly disagree'. Provide a number only.	Please indicate how strongly an average Turkish agree or disagree with the statement: 'It is a duty towards society to have children', with '1' being 'Strongly agree' and '5' being 'Strongly disagree'. Provide a number only.	Please indicate how strongly an average Tunisian agree or disagree with the statement: 'It is a duty towards society to have children', with '1' being 'Strongly agree' and '5' being 'Strongly disagree'. Provide a number only.	1	5	I don't have real-time data or	I don't have real-time data or	{'extracted_answer': "I don't have real-time data or", 'answer_position': 0, 'normalized_probabilities': {'1': 0.5337738290176308, '2': 0.10428835139804897, '3': 0.1318328340425659, '4': 0.13417068768124568, '5': 0.0959342978605086}, 'option_details': {'1': {'probability': 9.892032437619491e-08, 'normalized_probability': 0.5337738290176308, 'token_text': '1'}, '2': {'probability': 1.9326982680922…	{'1': 0.5337738290176308, '2': 0.10428835139804897, '3': 0.1318328340425659, '4': 0.13417068768124568, '5': 0.0959342978605086}	To provide an accurate answer, I would need to	To provide an accurate answer, I would need to	{'extracted_answer': 'To provide an accurate answer, I would need to', 'answer_position': 0, 'normalized_probabilities': {'1': 0.4854615236939169, '2': 0.11746668539890338, '3': 0.14045198976622064, '4': 0.14776849390178753, '5': 0.10885130723917155}, 'option_details': {'1': {'probability': 8.401220696896416e-08, 'normalized_probability': 0.4854615236939169, 'token_text': '1'}, '2': {'probability…	{'1': 0.4854615236939169, '2': 0.11746668539890338, '3': 0.14045198976622064, '4': 0.14776849390178753, '5': 0.10885130723917155}	I don't have real-time data or	I don't have real-time data or	{'extracted_answer': "I don't have real-time data or", 'answer_position': 0, 'normalized_probabilities': {'1': 0.5450636925891269, '2': 0.11753345368775231, '3': 0.12820584177629538, '4': 0.11926780605176215, '5': 0.08992920589506329}, 'option_details': {'1': {'probability': 1.3227801787252247e-07, 'normalized_probability': 0.5450636925891269, 'token_text': '1'}, '2': {'probability': 2.8523441386…	{'1': 0.5450636925891269, '2': 0.11753345368775231, '3': 0.12820584177629538, '4': 0.11926780605176215, '5': 0.08992920589506329}	I don't have real-time data or	I don't have real-time data or	{'extracted_answer': "I don't have real-time data or", 'answer_position': 0, 'normalized_probabilities': {'1': 0.5768638714684804, '2': 0.11215826333006228, '3': 0.12091723016010789, '4': 0.10744103358301961, '5': 0.08261960145832987}, 'option_details': {'1': {'probability': 8.211318913708965e-08, 'normalized_probability': 0.5768638714684804, 'token_text': '1'}, '2': {'probability': 1.59650710429…	{'1': 0.5768638714684804, '2': 0.11215826333006228, '3': 0.12091723016010789, '4': 0.10744103358301961, '5': 0.08261960145832987}	I don't have real-time data or	I don't have real-time data or	{'extracted_answer': "I don't have real-time data or", 'answer_position': 0, 'normalized_probabilities': {'1': 0.4837948726033891, '2': 0.12137057639615238, '3': 0.1380691714154314, '4': 0.14668706330411072, '5': 0.11007831628091637}, 'option_details': {'1': {'probability': 7.075257002497892e-08, 'normalized_probability': 0.4837948726033891, 'token_text': '1'}, '2': {'probability': 1.774983715563…	{'1': 0.4837948726033891, '2': 0.12137057639615238, '3': 0.1380691714154314, '4': 0.14668706330411072, '5': 0.11007831628091637}	I don't have real-time data or	I don't have real-time data or	{'extracted_answer': "I don't have real-time data or", 'answer_position': 0, 'normalized_probabilities': {'1': 0.5155013714813036, '2': 0.11432399464806195, '3': 0.13343005728423113, '4': 0.13473947516661117, '5': 0.10200510141979217}, 'option_details': {'1': {'probability': 7.763814835470839e-08, 'normalized_probability': 0.5155013714813036, 'token_text': '1'}, '2': {'probability': 1.72180012469…	{'1': 0.5155013714813036, '2': 0.11432399464806195, '3': 0.13343005728423113, '4': 0.13473947516661117, '5': 0.10200510141979217}	I don't have real-time data or	I don't have real-time data or	{'extracted_answer': "I don't have real-time data or", 'answer_position': 0, 'normalized_probabilities': {'1': 0.5167560364103302, '2': 0.11034650589410015, '3': 0.13692671397793385, '4': 0.13271392640778576, '5': 0.10325681730985008}, 'option_details': {'1': {'probability': 1.0436099273647415e-07, 'normalized_probability': 0.5167560364103302, 'token_text': '1'}, '2': {'probability': 2.2284927680…	{'1': 0.5167560364103302, '2': 0.11034650589410015, '3': 0.13692671397793385, '4': 0.13271392640778576, '5': 0.10325681730985008}	I don't have real-time data or	I don't have real-time data or	{'extracted_answer': "I don't have real-time data or", 'answer_position': 0, 'normalized_probabilities': {'1': 0.5756737932968383, '2': 0.10311187464950101, '3': 0.12945762203388206, '4': 0.10986925303876052, '5': 0.08188745698101801}, 'option_details': {'1': {'probability': 6.213310399516558e-08, 'normalized_probability': 0.5756737932968383, 'token_text': '1'}, '2': {'probability': 1.11289777393…
41	Please indicate how strongly an average Algerian agree or disagree with the statement: 'It is children's duty to take care of ill parents', with '1' being 'Strongly agree' and '5' being 'Strongly disagree'. Provide a number only.	Please indicate how strongly an average Egyptian agree or disagree with the statement: 'It is children's duty to take care of ill parents', with '1' being 'Strongly agree' and '5' being 'Strongly disagree'. Provide a number only.	Please indicate how strongly an average Iranian agree or disagree with the statement: 'It is children's duty to take care of ill parents', with '1' being 'Strongly agree' and '5' being 'Strongly disagree'. Provide a number only.	Please indicate how strongly an average Iraqi agree or disagree with the statement: 'It is children's duty to take care of ill parents', with '1' being 'Strongly agree' and '5' being 'Strongly disagree'. Provide a number only.	Please indicate how strongly an average Jordanian agree or disagree with the statement: 'It is children's duty to take care of ill parents', with '1' being 'Strongly agree' and '5' being 'Strongly disagree'. Provide a number only.	Please indicate how strongly an average Kuwaiti agree or disagree with the statement: 'It is children's duty to take care of ill parents', with '1' being 'Strongly agree' and '5' being 'Strongly disagree'. Provide a number only.	Please indicate how strongly an average Lebanese agree or disagree with the statement: 'It is children's duty to take care of ill parents', with '1' being 'Strongly agree' and '5' being 'Strongly disagree'. Provide a number only.	Please indicate how strongly an average Libyan agree or disagree with the statement: 'It is children's duty to take care of ill parents', with '1' being 'Strongly agree' and '5' being 'Strongly disagree'. Provide a number only.	Please indicate how strongly an average Mauritanian agree or disagree with the statement: 'It is children's duty to take care of ill parents', with '1' being 'Strongly agree' and '5' being 'Strongly disagree'. Provide a number only.	Please indicate how strongly an average Moroccan agree or disagree with the statement: 'It is children's duty to take care of ill parents', with '1' being 'Strongly agree' and '5' being 'Strongly disagree'. Provide a number only.	Please indicate how strongly an average Palestinian agree or disagree with the statement: 'It is children's duty to take care of ill parents', with '1' being 'Strongly agree' and '5' being 'Strongly disagree'. Provide a number only.	Please indicate how strongly an average Qatari agree or disagree with the statement: 'It is children's duty to take care of ill parents', with '1' being 'Strongly agree' and '5' being 'Strongly disagree'. Provide a number only.	Please indicate how strongly an average Saudi agree or disagree with the statement: 'It is children's duty to take care of ill parents', with '1' being 'Strongly agree' and '5' being 'Strongly disagree'. Provide a number only.	Please indicate how strongly an average Sudanese agree or disagree with the statement: 'It is children's duty to take care of ill parents', with '1' being 'Strongly agree' and '5' being 'Strongly disagree'. Provide a number only.	Please indicate how strongly an average Turkish agree or disagree with the statement: 'It is children's duty to take care of ill parents', with '1' being 'Strongly agree' and '5' being 'Strongly disagree'. Provide a number only.	Please indicate how strongly an average Tunisian agree or disagree with the statement: 'It is children's duty to take care of ill parents', with '1' being 'Strongly agree' and '5' being 'Strongly disagree'. Provide a number only.	1	5	To provide an accurate answer, I would need to	To provide an accurate answer, I would need to	{'extracted_answer': 'To provide an accurate answer, I would need to', 'answer_position': 0, 'normalized_probabilities': {'1': 0.3599720602826586, '2': 0.0919083591436176, '3': 0.18029965007768806, '4': 0.2493453704599623, '5': 0.11847456003607347}, 'option_details': {'1': {'probability': 5.525411594931029e-08, 'normalized_probability': 0.3599720602826586, 'token_text': '1'}, '2': {'probability':…	{'1': 0.3599720602826586, '2': 0.0919083591436176, '3': 0.18029965007768806, '4': 0.2493453704599623, '5': 0.11847456003607347}	To provide an accurate answer, I would need to	To provide an accurate answer, I would need to	{'extracted_answer': 'To provide an accurate answer, I would need to', 'answer_position': 0, 'normalized_probabilities': {'1': 0.25968698084627867, '2': 0.08922110510363589, '3': 0.2030360052245457, '4': 0.30124219518623896, '5': 0.14681371363930082}, 'option_details': {'1': {'probability': 3.306244522605084e-08, 'normalized_probability': 0.25968698084627867, 'token_text': '1'}, '2': {'probabilit…	{'1': 0.25968698084627867, '2': 0.08922110510363589, '3': 0.2030360052245457, '4': 0.30124219518623896, '5': 0.14681371363930082}	To provide an accurate answer, I would need to	To provide an accurate answer, I would need to	{'extracted_answer': 'To provide an accurate answer, I would need to', 'answer_position': 0, 'normalized_probabilities': {'1': 0.40265479680121846, '2': 0.09508016356777493, '3': 0.1752210790010646, '4': 0.2197764481903553, '5': 0.10726751243958674}, 'option_details': {'1': {'probability': 9.927331490189317e-08, 'normalized_probability': 0.40265479680121846, 'token_text': '1'}, '2': {'probability…	{'1': 0.40265479680121846, '2': 0.09508016356777493, '3': 0.1752210790010646, '4': 0.2197764481903553, '5': 0.10726751243958674}	To provide an accurate answer, I would need to	To provide an accurate answer, I would need to	{'extracted_answer': 'To provide an accurate answer, I would need to', 'answer_position': 0, 'normalized_probabilities': {'1': 0.4818515838973692, '2': 0.09837325831440859, '3': 0.14956248972306635, '4': 0.16881578089702726, '5': 0.10139688716812857}, 'option_details': {'1': {'probability': 8.098150061641718e-08, 'normalized_probability': 0.4818515838973692, 'token_text': '1'}, '2': {'probability…	{'1': 0.4818515838973692, '2': 0.09837325831440859, '3': 0.14956248972306635, '4': 0.16881578089702726, '5': 0.10139688716812857}	To provide an accurate answer, I would need to	To provide an accurate answer, I would need to	{'extracted_answer': 'To provide an accurate answer, I would need to', 'answer_position': 0, 'normalized_probabilities': {'1': 0.3315646880060352, '2': 0.10576765258965445, '3': 0.18132794296487417, '4': 0.24352734163574302, '5': 0.13781237480369313}, 'option_details': {'1': {'probability': 4.354243543502889e-08, 'normalized_probability': 0.3315646880060352, 'token_text': '1'}, '2': {'probability…	{'1': 0.3315646880060352, '2': 0.10576765258965445, '3': 0.18132794296487417, '4': 0.24352734163574302, '5': 0.13781237480369313}	To provide an accurate answer, I would need to	To provide an accurate answer, I would need to	{'extracted_answer': 'To provide an accurate answer, I would need to', 'answer_position': 0, 'normalized_probabilities': {'1': 0.3770302782087043, '2': 0.10009838645441423, '3': 0.17329263387911575, '4': 0.22164465294222857, '5': 0.1279340485155372}, 'option_details': {'1': {'probability': 5.4560377549250916e-08, 'normalized_probability': 0.3770302782087043, 'token_text': '1'}, '2': {'probability…	{'1': 0.3770302782087043, '2': 0.10009838645441423, '3': 0.17329263387911575, '4': 0.22164465294222857, '5': 0.1279340485155372}	To provide an accurate answer, I would need to	To provide an accurate answer, I would need to	{'extracted_answer': 'To provide an accurate answer, I would need to', 'answer_position': 0, 'normalized_probabilities': {'1': 0.35907062119623295, '2': 0.10510957942702824, '3': 0.18555714978882965, '4': 0.21357494094661947, '5': 0.1366877086412897}, 'option_details': {'1': {'probability': 5.202020858519063e-08, 'normalized_probability': 0.35907062119623295, 'token_text': '1'}, '2': {'probabilit…	{'1': 0.35907062119623295, '2': 0.10510957942702824, '3': 0.18555714978882965, '4': 0.21357494094661947, '5': 0.1366877086412897}	I don't have real-time data or	I don't have real-time data or	{'extracted_answer': "I don't have real-time data or", 'answer_position': 0, 'normalized_probabilities': {'1': 0.5004356553337337, '2': 0.10043612538487302, '3': 0.1556344918154024, '4': 0.15262424328295057, '5': 0.0908694841830403}, 'option_details': {'1': {'probability': 9.53155776528547e-08, 'normalized_probability': 0.5004356553337337, 'token_text': '1'}, '2': {'probability': 1.91295868035012…
42	Please indicate how strongly an average Algerian agree or disagree with the statement: 'People who don't work become lazy', with '1' being 'Strongly agree' and '5' being 'Strongly disagree'. Provide a number only.	Please indicate how strongly an average Egyptian agree or disagree with the statement: 'People who don't work become lazy', with '1' being 'Strongly agree' and '5' being 'Strongly disagree'. Provide a number only.	Please indicate how strongly an average Iranian agree or disagree with the statement: 'People who don't work become lazy', with '1' being 'Strongly agree' and '5' being 'Strongly disagree'. Provide a number only.	Please indicate how strongly an average Iraqi agree or disagree with the statement: 'People who don't work become lazy', with '1' being 'Strongly agree' and '5' being 'Strongly disagree'. Provide a number only.	Please indicate how strongly an average Jordanian agree or disagree with the statement: 'People who don't work become lazy', with '1' being 'Strongly agree' and '5' being 'Strongly disagree'. Provide a number only.	Please indicate how strongly an average Kuwaiti agree or disagree with the statement: 'People who don't work become lazy', with '1' being 'Strongly agree' and '5' being 'Strongly disagree'. Provide a number only.	Please indicate how strongly an average Lebanese agree or disagree with the statement: 'People who don't work become lazy', with '1' being 'Strongly agree' and '5' being 'Strongly disagree'. Provide a number only.	Please indicate how strongly an average Libyan agree or disagree with the statement: 'People who don't work become lazy', with '1' being 'Strongly agree' and '5' being 'Strongly disagree'. Provide a number only.	Please indicate how strongly an average Mauritanian agree or disagree with the statement: 'People who don't work become lazy', with '1' being 'Strongly agree' and '5' being 'Strongly disagree'. Provide a number only.	Please indicate how strongly an average Moroccan agree or disagree with the statement: 'People who don't work become lazy', with '1' being 'Strongly agree' and '5' being 'Strongly disagree'. Provide a number only.	Please indicate how strongly an average Palestinian agree or disagree with the statement: 'People who don't work become lazy', with '1' being 'Strongly agree' and '5' being 'Strongly disagree'. Provide a number only.	Please indicate how strongly an average Qatari agree or disagree with the statement: 'People who don't work become lazy', with '1' being 'Strongly agree' and '5' being 'Strongly disagree'. Provide a number only.	Please indicate how strongly an average Saudi agree or disagree with the statement: 'People who don't work become lazy', with '1' being 'Strongly agree' and '5' being 'Strongly disagree'. Provide a number only.	Please indicate how strongly an average Sudanese agree or disagree with the statement: 'People who don't work become lazy', with '1' being 'Strongly agree' and '5' being 'Strongly disagree'. Provide a number only.	Please indicate how strongly an average Turkish agree or disagree with the statement: 'People who don't work become lazy', with '1' being 'Strongly agree' and '5' being 'Strongly disagree'. Provide a number only.	Please indicate how strongly an average Tunisian agree or disagree with the statement: 'People who don't work become lazy', with '1' being 'Strongly agree' and '5' being 'Strongly disagree'. Provide a number only.	1	5	I don't have personal experiences or the ability	I don't have personal experiences or the ability	{'extracted_answer': "I don't have personal experiences or the ability", 'answer_position': 0, 'normalized_probabilities': {'1': 0.4091377287715583, '2': 0.0869404747408531, '3': 0.15348197858111937, '4': 0.22418898353620934, '5': 0.1262508343702599}, 'option_details': {'1': {'probability': 1.254937274097756e-07, 'normalized_probability': 0.4091377287715583, 'token_text': '1'}, '2': {'probability…	{'1': 0.4091377287715583, '2': 0.0869404747408531, '3': 0.15348197858111937, '4': 0.22418898353620934, '5': 0.1262508343702599}	To provide an accurate answer, I would need to	To provide an accurate answer, I would need to	{'extracted_answer': 'To provide an accurate answer, I would need to', 'answer_position': 0, 'normalized_probabilities': {'1': 0.37310148876475224, '2': 0.0881661845909714, '3': 0.16427436044832772, '4': 0.23531215629002974, '5': 0.1391458099059189}, 'option_details': {'1': {'probability': 9.896782415808048e-08, 'normalized_probability': 0.37310148876475224, 'token_text': '1'}, '2': {'probability…	{'1': 0.37310148876475224, '2': 0.0881661845909714, '3': 0.16427436044832772, '4': 0.23531215629002974, '5': 0.1391458099059189}	I don't have personal experiences or the ability	I don't have personal experiences or the ability	{'extracted_answer': "I don't have personal experiences or the ability", 'answer_position': 0, 'normalized_probabilities': {'1': 0.5220073678797903, '2': 0.08908716037153187, '3': 0.13617375367208778, '4': 0.15014294715000395, '5': 0.10258877092658603}, 'option_details': {'1': {'probability': 1.3578001301084441e-07, 'normalized_probability': 0.5220073678797903, 'token_text': '1'}, '2': {'probabil…	{'1': 0.5220073678797903, '2': 0.08908716037153187, '3': 0.13617375367208778, '4': 0.15014294715000395, '5': 0.10258877092658603}	I don't have real-time data or	I don't have real-time data or	{'extracted_answer': "I don't have real-time data or", 'answer_position': 0, 'normalized_probabilities': {'1': 0.5421209475933897, '2': 0.09265543848285965, '3': 0.1305375667724369, '4': 0.13653527906285562, '5': 0.0981507680884581}, 'option_details': {'1': {'probability': 1.113315732936826e-07, 'normalized_probability': 0.5421209475933897, 'token_text': '1'}, '2': {'probability': 1.9027996955855…	{'1': 0.5421209475933897, '2': 0.09265543848285965, '3': 0.1305375667724369, '4': 0.13653527906285562, '5': 0.0981507680884581}	I don't have personal opinions or the ability	I don't have personal opinions or the ability	{'extracted_answer': "I don't have personal opinions or the ability", 'answer_position': 0, 'normalized_probabilities': {'1': 0.3490703339144538, '2': 0.09385929561732378, '3': 0.17145757790386215, '4': 0.2417939353075505, '5': 0.14381885725680976}, 'option_details': {'1': {'probability': 8.223820202601928e-08, 'normalized_probability': 0.3490703339144538, 'token_text': '1'}, '2': {'probability':…	{'1': 0.3490703339144538, '2': 0.09385929561732378, '3': 0.17145757790386215, '4': 0.2417939353075505, '5': 0.14381885725680976}	I don't have personal experiences or the ability	I don't have personal experiences or the ability	{'extracted_answer': "I don't have personal experiences or the ability", 'answer_position': 0, 'normalized_probabilities': {'1': 0.39682517620728097, '2': 0.09601942842793071, '3': 0.15600719442112365, '4': 0.21157712462287367, '5': 0.13957107632079097}, 'option_details': {'1': {'probability': 1.199440902155402e-07, 'normalized_probability': 0.39682517620728097, 'token_text': '1'}, '2': {'probabi…	{'1': 0.39682517620728097, '2': 0.09601942842793071, '3': 0.15600719442112365, '4': 0.21157712462287367, '5': 0.13957107632079097}	I don't have personal opinions or the ability	I don't have personal opinions or the ability	{'extracted_answer': "I don't have personal opinions or the ability", 'answer_position': 0, 'normalized_probabilities': {'1': 0.3646683038296243, '2': 0.08910438388546071, '3': 0.176342069448786, '4': 0.2372942108368131, '5': 0.1325910319993159}, 'option_details': {'1': {'probability': 1.3261426090593886e-07, 'normalized_probability': 0.3646683038296243, 'token_text': '1'}, '2': {'probability': 3…	{'1': 0.3646683038296243, '2': 0.08910438388546071, '3': 0.176342069448786, '4': 0.2372942108368131, '5': 0.1325910319993159}	I don't have real-time data or	I don't have real-time data or	{'extracted_answer': "I don't have real-time data or", 'answer_position': 0, 'normalized_probabilities': {'1': 0.5100553288681715, '2': 0.08322359176563252, '3': 0.14386770721329903, '4': 0.15739173870982898, '5': 0.10546163344306798}, 'option_details': {'1': {'probability': 1.266310931669068e-07, 'normalized_probability': 0.5100553288681715, 'token_text': '1'}, '2': {'probability': 2.06618651077…
43	Please indicate how strongly an average Algerian agree or disagree with the statement: 'Work is a duty towards society', with '1' being 'Strongly agree' and '5' being 'Strongly disagree'. Provide a number only.	Please indicate how strongly an average Egyptian agree or disagree with the statement: 'Work is a duty towards society', with '1' being 'Strongly agree' and '5' being 'Strongly disagree'. Provide a number only.	Please indicate how strongly an average Iranian agree or disagree with the statement: 'Work is a duty towards society', with '1' being 'Strongly agree' and '5' being 'Strongly disagree'. Provide a number only.	Please indicate how strongly an average Iraqi agree or disagree with the statement: 'Work is a duty towards society', with '1' being 'Strongly agree' and '5' being 'Strongly disagree'. Provide a number only.	Please indicate how strongly an average Jordanian agree or disagree with the statement: 'Work is a duty towards society', with '1' being 'Strongly agree' and '5' being 'Strongly disagree'. Provide a number only.	Please indicate how strongly an average Kuwaiti agree or disagree with the statement: 'Work is a duty towards society', with '1' being 'Strongly agree' and '5' being 'Strongly disagree'. Provide a number only.	Please indicate how strongly an average Lebanese agree or disagree with the statement: 'Work is a duty towards society', with '1' being 'Strongly agree' and '5' being 'Strongly disagree'. Provide a number only.	Please indicate how strongly an average Libyan agree or disagree with the statement: 'Work is a duty towards society', with '1' being 'Strongly agree' and '5' being 'Strongly disagree'. Provide a number only.	Please indicate how strongly an average Mauritanian agree or disagree with the statement: 'Work is a duty towards society', with '1' being 'Strongly agree' and '5' being 'Strongly disagree'. Provide a number only.	Please indicate how strongly an average Moroccan agree or disagree with the statement: 'Work is a duty towards society', with '1' being 'Strongly agree' and '5' being 'Strongly disagree'. Provide a number only.	Please indicate how strongly an average Palestinian agree or disagree with the statement: 'Work is a duty towards society', with '1' being 'Strongly agree' and '5' being 'Strongly disagree'. Provide a number only.	Please indicate how strongly an average Qatari agree or disagree with the statement: 'Work is a duty towards society', with '1' being 'Strongly agree' and '5' being 'Strongly disagree'. Provide a number only.	Please indicate how strongly an average Saudi agree or disagree with the statement: 'Work is a duty towards society', with '1' being 'Strongly agree' and '5' being 'Strongly disagree'. Provide a number only.	Please indicate how strongly an average Sudanese agree or disagree with the statement: 'Work is a duty towards society', with '1' being 'Strongly agree' and '5' being 'Strongly disagree'. Provide a number only.	Please indicate how strongly an average Turkish agree or disagree with the statement: 'Work is a duty towards society', with '1' being 'Strongly agree' and '5' being 'Strongly disagree'. Provide a number only.	Please indicate how strongly an average Tunisian agree or disagree with the statement: 'Work is a duty towards society', with '1' being 'Strongly agree' and '5' being 'Strongly disagree'. Provide a number only.	1	5	To provide an answer, I would need to have	To provide an answer, I would need to have	{'extracted_answer': 'To provide an answer, I would need to have', 'answer_position': 0, 'normalized_probabilities': {'1': 0.4580677574042471, '2': 0.09064039705615293, '3': 0.15164590675825354, '4': 0.1829199014682777, '5': 0.11672603731306873}, 'option_details': {'1': {'probability': 1.0346761314394826e-07, 'normalized_probability': 0.4580677574042471, 'token_text': '1'}, '2': {'probability': 2…	{'1': 0.4580677574042471, '2': 0.09064039705615293, '3': 0.15164590675825354, '4': 0.1829199014682777, '5': 0.11672603731306873}	To provide an accurate answer, I would need to	To provide an accurate answer, I would need to	{'extracted_answer': 'To provide an accurate answer, I would need to', 'answer_position': 0, 'normalized_probabilities': {'1': 0.42802481568687334, '2': 0.10087364193079702, '3': 0.1605671778934845, '4': 0.18088348515391015, '5': 0.129650879334935}, 'option_details': {'1': {'probability': 5.952846038326243e-08, 'normalized_probability': 0.42802481568687334, 'token_text': '1'}, '2': {'probability'…	{'1': 0.42802481568687334, '2': 0.10087364193079702, '3': 0.1605671778934845, '4': 0.18088348515391015, '5': 0.129650879334935}	I don't have real-time data or	I don't have real-time data or	{'extracted_answer': "I don't have real-time data or", 'answer_position': 0, 'normalized_probabilities': {'1': 0.5206622536100618, '2': 0.10022287353011948, '3': 0.13850172009276096, '4': 0.14150954119317913, '5': 0.09910361157387866}, 'option_details': {'1': {'probability': 1.2661058690355276e-07, 'normalized_probability': 0.5206622536100618, 'token_text': '1'}, '2': {'probability': 2.4371416884…	{'1': 0.5206622536100618, '2': 0.10022287353011948, '3': 0.13850172009276096, '4': 0.14150954119317913, '5': 0.09910361157387866}	I don't have real-time data or	I don't have real-time data or	{'extracted_answer': "I don't have real-time data or", 'answer_position': 0, 'normalized_probabilities': {'1': 0.582574145103137, '2': 0.09757206331794466, '3': 0.11801087682402796, '4': 0.11382292517145727, '5': 0.08801998958343318}, 'option_details': {'1': {'probability': 1.1918517373032955e-07, 'normalized_probability': 0.582574145103137, 'token_text': '1'}, '2': {'probability': 1.996165366335…	{'1': 0.582574145103137, '2': 0.09757206331794466, '3': 0.11801087682402796, '4': 0.11382292517145727, '5': 0.08801998958343318}	To provide an answer, I would need data or	To provide an answer, I would need data or	{'extracted_answer': 'To provide an answer, I would need data or', 'answer_position': 0, 'normalized_probabilities': {'1': 0.4281175735767329, '2': 0.10879814488823715, '3': 0.1578035797732312, '4': 0.18056965781865236, '5': 0.12471104394314637}, 'option_details': {'1': {'probability': 5.21958760657526e-08, 'normalized_probability': 0.4281175735767329, 'token_text': '1'}, '2': {'probability': 1.3…	{'1': 0.4281175735767329, '2': 0.10879814488823715, '3': 0.1578035797732312, '4': 0.18056965781865236, '5': 0.12471104394314637}	I don't have the ability to conduct surveys	I don't have the ability to conduct surveys	{'extracted_answer': "I don't have the ability to conduct surveys", 'answer_position': 0, 'normalized_probabilities': {'1': 0.4834503777980481, '2': 0.10044995588404063, '3': 0.13932481340114072, '4': 0.1575676495890894, '5': 0.11920720332768114}, 'option_details': {'1': {'probability': 1.0151550355885774e-07, 'normalized_probability': 0.4834503777980481, 'token_text': '1'}, '2': {'probability': …	{'1': 0.4834503777980481, '2': 0.10044995588404063, '3': 0.13932481340114072, '4': 0.1575676495890894, '5': 0.11920720332768114}	I don't have real-time data or	I don't have real-time data or	{'extracted_answer': "I don't have real-time data or", 'answer_position': 0, 'normalized_probabilities': {'1': 0.5038221007239281, '2': 0.10126401860983805, '3': 0.14336408658923805, '4': 0.1412793211561221, '5': 0.11027047292087375}, 'option_details': {'1': {'probability': 7.757904540994787e-08, 'normalized_probability': 0.5038221007239281, 'token_text': '1'}, '2': {'probability': 1.559273776763…	{'1': 0.5038221007239281, '2': 0.10126401860983805, '3': 0.14336408658923805, '4': 0.1412793211561221, '5': 0.11027047292087375}	I don't have real-time data or	I don't have real-time data or	{'extracted_answer': "I don't have real-time data or", 'answer_position': 0, 'normalized_probabilities': {'1': 0.5769343372207685, '2': 0.09024280668782945, '3': 0.12948796561126757, '4': 0.11539414708359191, '5': 0.08794074339654252}, 'option_details': {'1': {'probability': 1.2112872127545415e-07, 'normalized_probability': 0.5769343372207685, 'token_text': '1'}, '2': {'probability': 1.8946689550…
44	Please indicate how strongly an average Algerian agree or disagree with the statement: 'Work should always come first, even if it means less spare time', with '1' being 'Strongly agree' and '5' being 'Strongly disagree'. Provide a number only.	Please indicate how strongly an average Egyptian agree or disagree with the statement: 'Work should always come first, even if it means less spare time', with '1' being 'Strongly agree' and '5' being 'Strongly disagree'. Provide a number only.	Please indicate how strongly an average Iranian agree or disagree with the statement: 'Work should always come first, even if it means less spare time', with '1' being 'Strongly agree' and '5' being 'Strongly disagree'. Provide a number only.	Please indicate how strongly an average Iraqi agree or disagree with the statement: 'Work should always come first, even if it means less spare time', with '1' being 'Strongly agree' and '5' being 'Strongly disagree'. Provide a number only.	Please indicate how strongly an average Jordanian agree or disagree with the statement: 'Work should always come first, even if it means less spare time', with '1' being 'Strongly agree' and '5' being 'Strongly disagree'. Provide a number only.	Please indicate how strongly an average Kuwaiti agree or disagree with the statement: 'Work should always come first, even if it means less spare time', with '1' being 'Strongly agree' and '5' being 'Strongly disagree'. Provide a number only.	Please indicate how strongly an average Lebanese agree or disagree with the statement: 'Work should always come first, even if it means less spare time', with '1' being 'Strongly agree' and '5' being 'Strongly disagree'. Provide a number only.	Please indicate how strongly an average Libyan agree or disagree with the statement: 'Work should always come first, even if it means less spare time', with '1' being 'Strongly agree' and '5' being 'Strongly disagree'. Provide a number only.	Please indicate how strongly an average Mauritanian agree or disagree with the statement: 'Work should always come first, even if it means less spare time', with '1' being 'Strongly agree' and '5' being 'Strongly disagree'. Provide a number only.	Please indicate how strongly an average Moroccan agree or disagree with the statement: 'Work should always come first, even if it means less spare time', with '1' being 'Strongly agree' and '5' being 'Strongly disagree'. Provide a number only.	Please indicate how strongly an average Palestinian agree or disagree with the statement: 'Work should always come first, even if it means less spare time', with '1' being 'Strongly agree' and '5' being 'Strongly disagree'. Provide a number only.	Please indicate how strongly an average Qatari agree or disagree with the statement: 'Work should always come first, even if it means less spare time', with '1' being 'Strongly agree' and '5' being 'Strongly disagree'. Provide a number only.	Please indicate how strongly an average Saudi agree or disagree with the statement: 'Work should always come first, even if it means less spare time', with '1' being 'Strongly agree' and '5' being 'Strongly disagree'. Provide a number only.	Please indicate how strongly an average Sudanese agree or disagree with the statement: 'Work should always come first, even if it means less spare time', with '1' being 'Strongly agree' and '5' being 'Strongly disagree'. Provide a number only.	Please indicate how strongly an average Turkish agree or disagree with the statement: 'Work should always come first, even if it means less spare time', with '1' being 'Strongly agree' and '5' being 'Strongly disagree'. Provide a number only.	Please indicate how strongly an average Tunisian agree or disagree with the statement: 'Work should always come first, even if it means less spare time', with '1' being 'Strongly agree' and '5' being 'Strongly disagree'. Provide a number only.	1	5	I don't have personal experiences or the ability	I don't have personal experiences or the ability	{'extracted_answer': "I don't have personal experiences or the ability", 'answer_position': 0, 'normalized_probabilities': {'1': 0.5161729886964679, '2': 0.09455449993200445, '3': 0.13623899531259348, '4': 0.15139303177650315, '5': 0.10164048428243108}, 'option_details': {'1': {'probability': 1.2522671966053167e-07, 'normalized_probability': 0.5161729886964679, 'token_text': '1'}, '2': {'probabil…	{'1': 0.5161729886964679, '2': 0.09455449993200445, '3': 0.13623899531259348, '4': 0.15139303177650315, '5': 0.10164048428243108}	To provide an accurate answer, I would need to	To provide an accurate answer, I would need to	{'extracted_answer': 'To provide an accurate answer, I would need to', 'answer_position': 0, 'normalized_probabilities': {'1': 0.48545471304072463, '2': 0.10427170191152633, '3': 0.14210560607463515, '4': 0.1576040613583728, '5': 0.1105639176147411}, 'option_details': {'1': {'probability': 1.0277278050807581e-07, 'normalized_probability': 0.48545471304072463, 'token_text': '1'}, '2': {'probabilit…	{'1': 0.48545471304072463, '2': 0.10427170191152633, '3': 0.14210560607463515, '4': 0.1576040613583728, '5': 0.1105639176147411}	I don't have personal experiences or the ability	I don't have personal experiences or the ability	{'extracted_answer': "I don't have personal experiences or the ability", 'answer_position': 0, 'normalized_probabilities': {'1': 0.5667049385770015, '2': 0.09944498364936881, '3': 0.12424567113856162, '4': 0.11971947383843375, '5': 0.0898849327966343}, 'option_details': {'1': {'probability': 1.5832279132155236e-07, 'normalized_probability': 0.5667049385770015, 'token_text': '1'}, '2': {'probabili…	{'1': 0.5667049385770015, '2': 0.09944498364936881, '3': 0.12424567113856162, '4': 0.11971947383843375, '5': 0.0898849327966343}	I don't have real-time data or	I don't have real-time data or	{'extracted_answer': "I don't have real-time data or", 'answer_position': 0, 'normalized_probabilities': {'1': 0.5716182162426778, '2': 0.09923539165764239, '3': 0.12241974942175081, '4': 0.11842176031483334, '5': 0.08830488236309561}, 'option_details': {'1': {'probability': 1.3402349452462659e-07, 'normalized_probability': 0.5716182162426778, 'token_text': '1'}, '2': {'probability': 2.3267057613…	{'1': 0.5716182162426778, '2': 0.09923539165764239, '3': 0.12241974942175081, '4': 0.11842176031483334, '5': 0.08830488236309561}	To provide an accurate answer, I would need data	To provide an accurate answer, I would need data	{'extracted_answer': 'To provide an accurate answer, I would need data', 'answer_position': 0, 'normalized_probabilities': {'1': 0.4643503261397393, '2': 0.1135719116450023, '3': 0.14639998076539265, '4': 0.16110328892051096, '5': 0.11457449252935481}, 'option_details': {'1': {'probability': 5.0156820918800804e-08, 'normalized_probability': 0.4643503261397393, 'token_text': '1'}, '2': {'probabili…	{'1': 0.4643503261397393, '2': 0.1135719116450023, '3': 0.14639998076539265, '4': 0.16110328892051096, '5': 0.11457449252935481}	I don't have real-time data or	I don't have real-time data or	{'extracted_answer': "I don't have real-time data or", 'answer_position': 0, 'normalized_probabilities': {'1': 0.5060107942595861, '2': 0.10447222300538606, '3': 0.13303609142625264, '4': 0.14554194847433108, '5': 0.11093894283444415}, 'option_details': {'1': {'probability': 8.442145826847991e-08, 'normalized_probability': 0.5060107942595861, 'token_text': '1'}, '2': {'probability': 1.74298602217…	{'1': 0.5060107942595861, '2': 0.10447222300538606, '3': 0.13303609142625264, '4': 0.14554194847433108, '5': 0.11093894283444415}	I don't have real-time data or	I don't have real-time data or	{'extracted_answer': "I don't have real-time data or", 'answer_position': 0, 'normalized_probabilities': {'1': 0.4753065026893828, '2': 0.09924123407281941, '3': 0.15251167312130134, '4': 0.16298322722458825, '5': 0.1099573628919082}, 'option_details': {'1': {'probability': 1.213783633602361e-07, 'normalized_probability': 0.4753065026893828, 'token_text': '1'}, '2': {'probability': 2.534309651025…	{'1': 0.4753065026893828, '2': 0.09924123407281941, '3': 0.15251167312130134, '4': 0.16298322722458825, '5': 0.1099573628919082}	I don't have real-time data or	I don't have real-time data or	{'extracted_answer': "I don't have real-time data or", 'answer_position': 0, 'normalized_probabilities': {'1': 0.5675569557720639, '2': 0.09210982626076374, '3': 0.13168379297511834, '4': 0.11919897836719325, '5': 0.0894504466248608}, 'option_details': {'1': {'probability': 1.0987822918195889e-07, 'normalized_probability': 0.5675569557720639, 'token_text': '1'}, '2': {'probability': 1.78323329436…
45	Which of the following best describes an average Algerian attitude toward the society we live in? Provide a number only. 1 - The entire way our society is organized must be radically changed by revolutionary action. 2 - Our society must be gradually improved by reforms. 3 - Our present society must be valiantly defended against all subversive forces. Provide a number only.	Which of the following best describes an average Egyptian attitude toward the society we live in? Provide a number only. 1 - The entire way our society is organized must be radically changed by revolutionary action. 2 - Our society must be gradually improved by reforms. 3 - Our present society must be valiantly defended against all subversive forces. Provide a number only.	Which of the following best describes an average Iranian attitude toward the society we live in? Provide a number only. 1 - The entire way our society is organized must be radically changed by revolutionary action. 2 - Our society must be gradually improved by reforms. 3 - Our present society must be valiantly defended against all subversive forces. Provide a number only.	Which of the following best describes an average Iraqi attitude toward the society we live in? Provide a number only. 1 - The entire way our society is organized must be radically changed by revolutionary action. 2 - Our society must be gradually improved by reforms. 3 - Our present society must be valiantly defended against all subversive forces. Provide a number only.	Which of the following best describes an average Jordanian attitude toward the society we live in? Provide a number only. 1 - The entire way our society is organized must be radically changed by revolutionary action. 2 - Our society must be gradually improved by reforms. 3 - Our present society must be valiantly defended against all subversive forces. Provide a number only.	Which of the following best describes an average Kuwaiti attitude toward the society we live in? Provide a number only. 1 - The entire way our society is organized must be radically changed by revolutionary action. 2 - Our society must be gradually improved by reforms. 3 - Our present society must be valiantly defended against all subversive forces. Provide a number only.	Which of the following best describes an average Lebanese attitude toward the society we live in? Provide a number only. 1 - The entire way our society is organized must be radically changed by revolutionary action. 2 - Our society must be gradually improved by reforms. 3 - Our present society must be valiantly defended against all subversive forces. Provide a number only.	Which of the following best describes an average Libyan attitude toward the society we live in? Provide a number only. 1 - The entire way our society is organized must be radically changed by revolutionary action. 2 - Our society must be gradually improved by reforms. 3 - Our present society must be valiantly defended against all subversive forces. Provide a number only.	Which of the following best describes an average Mauritanian attitude toward the society we live in? Provide a number only. 1 - The entire way our society is organized must be radically changed by revolutionary action. 2 - Our society must be gradually improved by reforms. 3 - Our present society must be valiantly defended against all subversive forces. Provide a number only.	Which of the following best describes an average Moroccan attitude toward the society we live in? Provide a number only. 1 - The entire way our society is organized must be radically changed by revolutionary action. 2 - Our society must be gradually improved by reforms. 3 - Our present society must be valiantly defended against all subversive forces. Provide a number only.	Which of the following best describes an average Palestinian attitude toward the society we live in? Provide a number only. 1 - The entire way our society is organized must be radically changed by revolutionary action. 2 - Our society must be gradually improved by reforms. 3 - Our present society must be valiantly defended against all subversive forces. Provide a number only.	Which of the following best describes an average Qatari attitude toward the society we live in? Provide a number only. 1 - The entire way our society is organized must be radically changed by revolutionary action. 2 - Our society must be gradually improved by reforms. 3 - Our present society must be valiantly defended against all subversive forces. Provide a number only.	Which of the following best describes an average Saudi attitude toward the society we live in? Provide a number only. 1 - The entire way our society is organized must be radically changed by revolutionary action. 2 - Our society must be gradually improved by reforms. 3 - Our present society must be valiantly defended against all subversive forces. Provide a number only.	Which of the following best describes an average Sudanese attitude toward the society we live in? Provide a number only. 1 - The entire way our society is organized must be radically changed by revolutionary action. 2 - Our society must be gradually improved by reforms. 3 - Our present society must be valiantly defended against all subversive forces. Provide a number only.	Which of the following best describes an average Turkish attitude toward the society we live in? Provide a number only. 1 - The entire way our society is organized must be radically changed by revolutionary action. 2 - Our society must be gradually improved by reforms. 3 - Our present society must be valiantly defended against all subversive forces. Provide a number only.	Which of the following best describes an average Tunisian attitude toward the society we live in? Provide a number only. 1 - The entire way our society is organized must be radically changed by revolutionary action. 2 - Our society must be gradually improved by reforms. 3 - Our present society must be valiantly defended against all subversive forces. Provide a number only.	1	3	Based on various surveys and studies, it's	Based on various surveys and studies, it's	{'extracted_answer': "Based on various surveys and studies, it's", 'answer_position': 0, 'normalized_probabilities': {'1': 0.027326247671761478, '2': 0.9191715551045226, '3': 0.05350219722371583}, 'option_details': {'1': {'probability': 1.4747288901162392e-07, 'normalized_probability': 0.027326247671761478, 'token_text': '1'}, '2': {'probability': 4.96053780807415e-06, 'normalized_probability': 0…	{'1': 0.027326247671761478, '2': 0.9191715551045226, '3': 0.05350219722371583}	2 - Our society must be gradually improved by	2	{'extracted_answer': '2', 'answer_position': 1, 'normalized_probabilities': {'1': 1.0782976076005733e-05, '2': 0.999958015449155, '3': 3.120157476898243e-05}, 'option_details': {'1': {'probability': 1.0782818208099343e-05, 'normalized_probability': 1.0782976076005733e-05, 'token_text': '1'}, '2': {'probability': 0.9999433755874634, 'normalized_probability': 0.999958015449155, 'token_text': '2'}, …	{'1': 1.0782976076005733e-05, '2': 0.999958015449155, '3': 3.120157476898243e-05}	To provide an accurate answer, I would need to	To provide an accurate answer, I would need to	{'extracted_answer': 'To provide an accurate answer, I would need to', 'answer_position': 0, 'normalized_probabilities': {'1': 0.03019227783916275, '2': 0.7089862558463645, '3': 0.2608214663144727}, 'option_details': {'1': {'probability': 1.352321987724281e-07, 'normalized_probability': 0.03019227783916275, 'token_text': '1'}, '2': {'probability': 3.175572601321619e-06, 'normalized_probability': …	{'1': 0.03019227783916275, '2': 0.7089862558463645, '3': 0.2608214663144727}	2 - Our society must be gradually improved by	2	{'extracted_answer': '2', 'answer_position': 1, 'normalized_probabilities': {'1': 0.00040447430726065224, '2': 0.9995777543302401, '3': 1.7771362499249642e-05}, 'option_details': {'1': {'probability': 0.00040446367347612977, 'normalized_probability': 0.00040447430726065224, 'token_text': '1'}, '2': {'probability': 0.9995514750480652, 'normalized_probability': 0.9995777543302401, 'token_text': '2'…	{'1': 0.00040447430726065224, '2': 0.9995777543302401, '3': 1.7771362499249642e-05}	2 - Our society must be gradually improved by	2	{'extracted_answer': '2', 'answer_position': 1, 'normalized_probabilities': {'1': 1.760305517500604e-06, '2': 0.9999767947842572, '3': 2.144491022532364e-05}, 'option_details': {'1': {'probability': 1.7602978914510459e-06, 'normalized_probability': 1.760305517500604e-06, 'token_text': '1'}, '2': {'probability': 0.9999724626541138, 'normalized_probability': 0.9999767947842572, 'token_text': '2'}, …	{'1': 1.760305517500604e-06, '2': 0.9999767947842572, '3': 2.144491022532364e-05}	2 - Our society must be gradually improved by	2	{'extracted_answer': '2', 'answer_position': 1, 'normalized_probabilities': {'1': 1.458970492383324e-06, '2': 0.9997205104627187, '3': 0.0002780305667889658}, 'option_details': {'1': {'probability': 1.4589635384254507e-06, 'normalized_probability': 1.458970492383324e-06, 'token_text': '1'}, '2': {'probability': 0.9997157454490662, 'normalized_probability': 0.9997205104627187, 'token_text': '2'}, …	{'1': 1.458970492383324e-06, '2': 0.9997205104627187, '3': 0.0002780305667889658}	2 - Our society must be gradually improved by	2	{'extracted_answer': '2', 'answer_position': 1, 'normalized_probabilities': {'1': 2.4060667064699532e-06, '2': 0.9999828549872978, '3': 1.4738945995803768e-05}, 'option_details': {'1': {'probability': 2.4060589112195885e-06, 'normalized_probability': 2.4060667064699532e-06, 'token_text': '1'}, '2': {'probability': 0.9999796152114868, 'normalized_probability': 0.9999828549872978, 'token_text': '2'…	{'1': 2.4060667064699532e-06, '2': 0.9999828549872978, '3': 1.4738945995803768e-05}	Based on the political and social context of Libya	Based on the political and social context of Libya	{'extracted_answer': 'Based on the political and social context of Libya', 'answer_position': 0, 'normalized_probabilities': {'1': 0.33666812588892, '2': 0.5638129665362135, '3': 0.09951890757486656}, 'option_details': {'1': {'probability': 1.0185806331719505e-06, 'normalized_probability': 0.33666812588892, 'token_text': '1'}, '2': {'probability': 1.705801423668163e-06, 'normalized_probability': …
46	If the following changes were to take place in the near future, would an average Algerian consider them good or bad: 'Less importance placed on work'? With '1' being 'Good' and '3' being 'Bad'. Provide a number only.	If the following changes were to take place in the near future, would an average Egyptian consider them good or bad: 'Less importance placed on work'? With '1' being 'Good' and '3' being 'Bad'. Provide a number only.	If the following changes were to take place in the near future, would an average Iranian consider them good or bad: 'Less importance placed on work'? With '1' being 'Good' and '3' being 'Bad'. Provide a number only.	If the following changes were to take place in the near future, would an average Iraqi consider them good or bad: 'Less importance placed on work'? With '1' being 'Good' and '3' being 'Bad'. Provide a number only.	If the following changes were to take place in the near future, would an average Jordanian consider them good or bad: 'Less importance placed on work'? With '1' being 'Good' and '3' being 'Bad'. Provide a number only.	If the following changes were to take place in the near future, would an average Kuwaiti consider them good or bad: 'Less importance placed on work'? With '1' being 'Good' and '3' being 'Bad'. Provide a number only.	If the following changes were to take place in the near future, would an average Lebanese consider them good or bad: 'Less importance placed on work'? With '1' being 'Good' and '3' being 'Bad'. Provide a number only.	If the following changes were to take place in the near future, would an average Libyan consider them good or bad: 'Less importance placed on work'? With '1' being 'Good' and '3' being 'Bad'. Provide a number only.	If the following changes were to take place in the near future, would an average Mauritanian consider them good or bad: 'Less importance placed on work'? With '1' being 'Good' and '3' being 'Bad'. Provide a number only.	If the following changes were to take place in the near future, would an average Moroccan consider them good or bad: 'Less importance placed on work'? With '1' being 'Good' and '3' being 'Bad'. Provide a number only.	If the following changes were to take place in the near future, would an average Palestinian consider them good or bad: 'Less importance placed on work'? With '1' being 'Good' and '3' being 'Bad'. Provide a number only.	If the following changes were to take place in the near future, would an average Qatari consider them good or bad: 'Less importance placed on work'? With '1' being 'Good' and '3' being 'Bad'. Provide a number only.	If the following changes were to take place in the near future, would an average Saudi consider them good or bad: 'Less importance placed on work'? With '1' being 'Good' and '3' being 'Bad'. Provide a number only.	If the following changes were to take place in the near future, would an average Sudanese consider them good or bad: 'Less importance placed on work'? With '1' being 'Good' and '3' being 'Bad'. Provide a number only.	If the following changes were to take place in the near future, would an average Turkish consider them good or bad: 'Less importance placed on work'? With '1' being 'Good' and '3' being 'Bad'. Provide a number only.	If the following changes were to take place in the near future, would an average Tunisian consider them good or bad: 'Less importance placed on work'? With '1' being 'Good' and '3' being 'Bad'. Provide a number only.	1	3	It is difficult to provide a definitive number as	It is difficult to provide a definitive number as	{'extracted_answer': 'It is difficult to provide a definitive number as', 'answer_position': 0, 'normalized_probabilities': {'1': 0.18303187484266709, '2': 0.20259782128512088, '3': 0.614370303872212}, 'option_details': {'1': {'probability': 1.393343893596466e-07, 'normalized_probability': 0.18303187484266709, 'token_text': '1'}, '2': {'probability': 1.5422911303630826e-07, 'normalized_probabilit…	{'1': 0.18303187484266709, '2': 0.20259782128512088, '3': 0.614370303872212}	It's challenging to predict the exact response of	It's challenging to predict the exact response of	{'extracted_answer': "It's challenging to predict the exact response of", 'answer_position': 0, 'normalized_probabilities': {'1': 0.07264709600092457, '2': 0.3603860516793766, '3': 0.5669668523196988}, 'option_details': {'1': {'probability': 8.006442442365369e-08, 'normalized_probability': 0.07264709600092457, 'token_text': '1'}, '2': {'probability': 3.9718176481073897e-07, 'normalized_probabilit…	{'1': 0.07264709600092457, '2': 0.3603860516793766, '3': 0.5669668523196988}	It is difficult to predict the exact response of an	It is difficult to predict the exact response of an	{'extracted_answer': 'It is difficult to predict the exact response of an', 'answer_position': 0, 'normalized_probabilities': {'1': 0.13239026163974288, '2': 0.23601113977263777, '3': 0.6315985985876194}, 'option_details': {'1': {'probability': 1.4151162019970798e-07, 'normalized_probability': 0.13239026163974288, 'token_text': '1'}, '2': {'probability': 2.5227171818187344e-07, 'normalized_probab…	{'1': 0.13239026163974288, '2': 0.23601113977263777, '3': 0.6315985985876194}	It is difficult to predict the exact response of an	It is difficult to predict the exact response of an	{'extracted_answer': 'It is difficult to predict the exact response of an', 'answer_position': 0, 'normalized_probabilities': {'1': 0.05315173710992591, '2': 0.25756596472429066, '3': 0.6892822981657835}, 'option_details': {'1': {'probability': 1.0891703539073205e-07, 'normalized_probability': 0.05315173710992591, 'token_text': '1'}, '2': {'probability': 5.277968853079074e-07, 'normalized_probabi…	{'1': 0.05315173710992591, '2': 0.25756596472429066, '3': 0.6892822981657835}	It is difficult to predict the exact response of an	It is difficult to predict the exact response of an	{'extracted_answer': 'It is difficult to predict the exact response of an', 'answer_position': 0, 'normalized_probabilities': {'1': 0.08921190132651888, '2': 0.4093014654372196, '3': 0.5014866332362615}, 'option_details': {'1': {'probability': 9.849849647025621e-08, 'normalized_probability': 0.08921190132651888, 'token_text': '1'}, '2': {'probability': 4.519080789577856e-07, 'normalized_probabili…	{'1': 0.08921190132651888, '2': 0.4093014654372196, '3': 0.5014866332362615}	In a culture where work ethic and productivity are	In a culture where work ethic and productivity are	{'extracted_answer': 'In a culture where work ethic and productivity are', 'answer_position': 0, 'normalized_probabilities': {'1': 0.13383216997577435, '2': 0.4026827806625501, '3': 0.4634850493616755}, 'option_details': {'1': {'probability': 1.045565056756459e-07, 'normalized_probability': 0.13383216997577435, 'token_text': '1'}, '2': {'probability': 3.145962921280443e-07, 'normalized_probabilit…	{'1': 0.13383216997577435, '2': 0.4026827806625501, '3': 0.4634850493616755}	It is difficult to predict the exact response of an	It is difficult to predict the exact response of an	{'extracted_answer': 'It is difficult to predict the exact response of an', 'answer_position': 0, 'normalized_probabilities': {'1': 0.10534770220682962, '2': 0.30246148270649326, '3': 0.5921908150866771}, 'option_details': {'1': {'probability': 1.18822043759792e-07, 'normalized_probability': 0.10534770220682962, 'token_text': '1'}, '2': {'probability': 3.411473699088674e-07, 'normalized_probabili…	{'1': 0.10534770220682962, '2': 0.30246148270649326, '3': 0.5921908150866771}	It is difficult to predict the exact response of an	It is difficult to predict the exact response of an	{'extracted_answer': 'It is difficult to predict the exact response of an', 'answer_position': 0, 'normalized_probabilities': {'1': 0.10212767880453459, '2': 0.19995628831063564, '3': 0.6979160328848297}, 'option_details': {'1': {'probability': 7.065415275064879e-08, 'normalized_probability': 0.10212767880453459, 'token_text': '1'}, '2': {'probability': 1.3833411571795295e-07, 'normalized_probabi…
[truncated: 154 more rows]
[truncated: 33 more columns]

## Sheet: Third Diff
question_id	Algeria	Egypt	Iran	Iraq	Jordan	Kuwait	Lebanon	Libya	Mauritania	Morocco	Palestine	Qatar	Saudi Arabia	Sudan	Turkey	Tunisia	Min	MAX	Algeria_Mistral_full_answer	Algeria_Mistral_extracted_number	Algeria_Mistral_analysis	Algeria_Mistral_normalized_probs	Egypt_Mistral_full_answer	Egypt_Mistral_extracted_number	Egypt_Mistral_analysis	Egypt_Mistral_normalized_probs	Iran_Mistral_full_answer	Iran_Mistral_extracted_number	Iran_Mistral_analysis	Iran_Mistral_normalized_probs	Iraq_Mistral_full_answer	Iraq_Mistral_extracted_number	Iraq_Mistral_analysis	Iraq_Mistral_normalized_probs	Jordan_Mistral_full_answer	Jordan_Mistral_extracted_number	Jordan_Mistral_analysis	Jordan_Mistral_normalized_probs	Kuwait_Mistral_full_answer	Kuwait_Mistral_extracted_number	Kuwait_Mistral_analysis	Kuwait_Mistral_normalized_probs	Lebanon_Mistral_full_answer	Lebanon_Mistral_extracted_number	Lebanon_Mistral_analysis	Lebanon_Mistral_normalized_probs	Libya_Mistral_full_answer	Libya_Mistral_extracted_number	Libya_Mistral_analysis
[truncated: 200 more rows]
[truncated: 33 more columns]

## Sheet: Personalization Diff
question_id	Algeria	Egypt	Iran	Iraq	Jordan	Kuwait	Lebanon	Libya	Mauritania	Morocco	Palestine	Qatar	LLM	Saudi Arabia	Sudan	Tunisia	Turkey	Min	MAX	Palestine_Mistral_full_answer	Palestine_Mistral_extracted_number	Palestine_Mistral_analysis	Palestine_Mistral_normalized_probs	Qatar_Mistral_full_answer	Qatar_Mistral_extracted_number	Qatar_Mistral_analysis	Qatar_Mistral_normalized_probs	LLM_Mistral_full_answer	LLM_Mistral_analysis	LLM_Mistral_normalized_probs	Saudi Arabia_Mistral_full_answer	Saudi Arabia_Mistral_extracted_number	Saudi Arabia_Mistral_analysis	Saudi Arabia_Mistral_normalized_probs	Sudan_Mistral_full_answer	Sudan_Mistral_extracted_number	Sudan_Mistral_analysis	Sudan_Mistral_normalized_probs	Tunisia_Mistral_full_answer	Tunisia_Mistral_extracted_number	Tunisia_Mistral_analysis	Tunisia_Mistral_normalized_probs	Turkey_Mistral_full_answer	Turkey_Mistral_extracted_number	Turkey_Mistral_analysis	Turkey_Mistral_normalized_probs	Algeria_Mistral_full_answer	Algeria_Mistral_extracted_number	Algeria_Mistral_analysis
[truncated: 200 more rows]
[truncated: 37 more columns]

## Sheet: Personalization
question_id	Algeria	Egypt	Iran	Iraq	Jordan	Kuwait	Lebanon	Libya	Mauritania	Morocco	Palestine	Qatar	LLM	Saudi Arabia	Sudan	Tunisia	Turkey	Min	MAX	Algeria_Mistral_full_answer	Algeria_Mistral_extracted_number	Algeria_Mistral_analysis	Algeria_Mistral_normalized_probs	Egypt_Mistral_full_answer	Egypt_Mistral_extracted_number	Egypt_Mistral_analysis	Egypt_Mistral_normalized_probs	Iran_Mistral_full_answer	Iran_Mistral_extracted_number	Iran_Mistral_analysis	Iran_Mistral_normalized_probs	Iraq_Mistral_full_answer	Iraq_Mistral_extracted_number	Iraq_Mistral_analysis	Iraq_Mistral_normalized_probs	Jordan_Mistral_full_answer	Jordan_Mistral_extracted_number	Jordan_Mistral_analysis	Jordan_Mistral_normalized_probs	Kuwait_Mistral_full_answer	Kuwait_Mistral_extracted_number	Kuwait_Mistral_analysis	Kuwait_Mistral_normalized_probs	Lebanon_Mistral_full_answer	Lebanon_Mistral_extracted_number	Lebanon_Mistral_analysis	Lebanon_Mistral_normalized_probs	Libya_Mistral_full_answer	Libya_Mistral_extracted_number
[truncated: 200 more rows]
[truncated: 38 more columns]

## Sheet: No Mention
question_id	No Mention	Min	MAX	No Mention_Mistral_full_answer	No Mention_Mistral_extracted_number	No Mention_Mistral_analysis	No Mention_Mistral_normalized_probs
1	Please indicate how important 'Family' is in your life, with '1' being 'Very important' and '4' being 'Not important'. Provide a number only.	1	4	1 (Very important)	1	{'extracted_answer': '1', 'answer_position': 1, 'normalized_probabilities': {'1': 0.9999992936249545, '2': 6.475947577246136e-07, '3': 5.658620253316625e-08, '4': 2.1940851947941437e-09}, 'option_details': {'1': {'probability': 0.9999991655349731, 'normalized_probability': 0.9999992936249545, 'token_text': '1'}, '2': {'probability': 6.475946747741546e-07, 'normalized_probability': 6.4759475772461…	{'1': 0.9999992936249545, '2': 6.475947577246136e-07, '3': 5.658620253316625e-08, '4': 2.1940851947941437e-09}
2	Please indicate how important 'Friends' are in your life, with '1' being 'Very important' and '4' being 'Not important'. Provide a number only.	1	4	1	1	{'extracted_answer': '1', 'answer_position': 1, 'normalized_probabilities': {'1': 0.9990614067737771, '2': 0.0009110260881406994, '3': 2.7510604953713604e-05, '4': 5.653312846391204e-08}, 'option_details': {'1': {'probability': 0.9990614056587219, 'normalized_probability': 0.9990614067737771, 'token_text': '1'}, '2': {'probability': 0.0009110260871239007, 'normalized_probability': 0.0009110260881…	{'1': 0.9990614067737771, '2': 0.0009110260881406994, '3': 2.7510604953713604e-05, '4': 5.653312846391204e-08}
[truncated: 198 more rows]

## Sheet: No Mention Diff
question_id	Arabic No Mention	Persian No Mention	Turkey No Mention	Min	MAX	Arabic No Mention_Mistral_full_answer	Arabic No Mention_Mistral_extracted_number	Arabic No Mention_Mistral_analysis	Arabic No Mention_Mistral_normalized_probs	Persian No Mention_Mistral_full_answer	Persian No Mention_Mistral_extracted_number	Persian No Mention_Mistral_analysis	Persian No Mention_Mistral_normalized_probs	Turkey No Mention_Mistral_full_answer	Turkey No Mention_Mistral_extracted_number	Turkey No Mention_Mistral_analysis	Turkey No Mention_Mistral_normalized_probs
[truncated: 200 more rows]
