# Supplementary material
Source: ML conference proceedings conference paper supplement (https://openreview.net/forum?id=1o0H00pH0y)
Supplement: supplementary_material [file Survey_Weights Transposed.xlsx]

## Sheet: Sheet1
Egypt	Iran	Iraq	Jordan	Lebanon	Libya	Morocco	Turkey	Tunisia	Algeria	Saudi Arabia	Sudan	Palestine	Kuwait	Mauritania	Qatar	question_number	Category
(1.0, {'1': '99.67%', '2': '0.33%'})	(1.07, {'1': '93.93%', '2': '5.20%', '3': '0.80%', '4': '0.07%'})	(1.03, {'1': '97.25%', '2': '2.25%', '3': '0.50%'})	(1.02, {'1': '97.92%', '2': '1.91%', '4': '0.17%'})	(1.03, {'1': '96.83%', '2': '3.08%', '3': '0.08%'})	(1.02, {'1': '98.16%', '2': '1.59%', '3': '0.17%', '4': '0.08%'})	(1.12, {'1': '89.08%', '2': '9.67%', '3': '1.08%', '4': '0.17%'})	(1.09, {'1': '91.80%', '2': '7.37%', '3': '0.62%', '4': '0.21%'})	(1.03, {'1': '97.43%', '2': '2.07%', '3': '0.41%', '4': '0.08%'})								1	SOCIAL & CULTURAL IDENTITY
(1.82, {'1': '41.70%', '2': '39.70%', '3': '13.68%', '4': '4.92%'})	(1.93, {'2': '53.21%', '1': '29.81%', '3': '10.90%', '4': '6.08%'})	(1.59, {'1': '53.76%', '2': '36.56%', '3': '7.01%', '4': '2.67%'})	(1.63, {'1': '51.50%', '2': '37.42%', '3': '7.75%', '4': '3.33%'})	(1.57, {'1': '52.58%', '2': '39.33%', '3': '6.75%', '4': '1.33%'})	(1.42, {'1': '63.10%', '2': '33.05%', '3': '2.76%', '4': '1.09%'})	(1.77, {'1': '42.25%', '2': '42.00%', '3': '12.17%', '4': '3.58%'})	(1.42, {'1': '61.73%', '2': '34.99%', '3': '2.86%', '4': '0.41%'})	(1.74, {'1': '47.10%', '2': '35.82%', '3': '12.77%', '4': '4.31%'})								2	SOCIAL & CULTURAL IDENTITY
(2.39, {'2': '36.75%', '3': '31.79%', '1': '18.42%', '4': '13.04%'})	(1.7, {'2': '51.17%', '1': '40.48%', '3': '5.74%', '4': '2.61%'})	(1.92, {'1': '39.65%', '2': '36.38%', '3': '16.68%', '4': '7.29%'})	(1.8, {'1': '43.20%', '2': '38.12%', '3': '14.35%', '4': '4.34%'})	(1.65, {'1': '49.92%', '2': '37.92%', '3': '9.00%', '4': '3.17%'})	(2.05, {'2': '37.36%', '1': '32.66%', '3': '22.00%', '4': '7.98%'})	(1.89, {'2': '42.25%', '1': '36.67%', '3': '16.25%', '4': '4.83%'})	(1.54, {'1': '54.48%', '2': '38.13%', '3': '6.72%', '4': '0.66%'})	(1.79, {'1': '43.86%', '2': '36.32%', '3': '16.92%', '4': '2.90%'})								3	SOCIAL & CULTURAL IDENTITY
(3.0, {'4': '38.86%', '3': '30.23%', '2': '22.54%', '1': '8.37%'})	(2.41, {'2': '35.68%', '1': '22.69%', '4': '22.29%', '3': '19.34%'})	(2.74, {'4': '31.54%', '3': '28.46%', '2': '21.97%', '1': '18.03%'})	(2.64, {'4': '30.56%', '2': '28.55%', '3': '22.08%', '1': '18.81%'})	(2.68, {'3': '32.80%', '2': '27.11%', '4': '25.10%', '1': '14.98%'})	(2.57, {'2': '29.49%', '4': '26.12%', '3': '24.35%', '1': '20.05%'})	(2.39, {'2': '38.50%', '3': '30.25%', '1': '17.83%', '4': '13.42%'})	(2.35, {'2': '35.65%', '3': '30.00%', '1': '21.10%', '4': '13.25%'})	(2.73, {'3': '32.27%', '4': '28.18%', '2': '24.41%', '1': '15.13%'})								4	SOCIAL & CULTURAL IDENTITY
(1.44, {'1': '73.83%', '2': '13.38%', '3': '7.86%', '4': '4.93%'})	(1.27, {'1': '77.78%', '2': '18.67%', '3': '1.87%', '4': '1.67%'})	(1.26, {'1': '80.72%', '2': '13.69%', '3': '4.17%', '4': '1.42%'})	(1.4, {'1': '74.17%', '2': '16.56%', '4': '4.68%', '3': '4.59%'})	(1.38, {'1': '72.75%', '2': '18.92%', '3': '6.00%', '4': '2.33%'})	(1.17, {'1': '88.12%', '2': '8.42%', '3': '2.02%', '4': '1.43%'})	(1.22, {'1': '82.67%', '2': '13.17%', '3': '3.33%', '4': '0.83%'})	(1.72, {'1': '46.13%', '2': '37.98%', '3': '13.39%', '4': '2.50%'})	(1.24, {'1': '83.47%', '2': '10.60%', '3': '4.59%', '4': '1.34%'})								5	SOCIAL & CULTURAL IDENTITY
(1.03, {'1': '97.33%', '2': '2.67%'})	(1.41, {'1': '70.56%', '2': '22.03%', '4': '4.07%', '3': '3.34%'})	(1.17, {'1': '87.58%', '2': '9.00%', '3': '2.50%', '4': '0.92%'})	(1.06, {'1': '95.43%', '2': '3.57%', '3': '0.83%', '4': '0.17%'})	(1.46, {'1': '64.08%', '2': '28.08%', '3': '5.42%', '4': '2.42%'})	(1.03, {'1': '97.99%', '2': '1.51%', '3': '0.50%'})	(1.13, {'1': '89.00%', '2': '9.58%', '3': '1.25%', '4': '0.17%'})	(1.52, {'1': '60.15%', '2': '28.44%', '3': '10.38%', '4': '1.04%'})	(1.11, {'1': '90.63%', '2': '8.13%', '3': '1.00%', '4': '0.25%'})								6	SOCIAL & CULTURAL IDENTITY
(1.04, {'1': '96.25%', '2': '3.75%'})	(1.44, {'1': '56.17%', '2': '43.83%'})	(1.09, {'1': '91.42%', '2': '8.58%'})	(1.14, {'1': '86.03%', '2': '13.97%'})	(1.24, {'1': '76.00%', '2': '24.00%'})	(1.05, {'1': '94.65%', '2': '5.35%'})	(1.12, {'1': '87.50%', '2': '12.50%'})	(1.17, {'1': '82.96%', '2': '17.04%'})	(1.04, {'1': '96.41%', '2': '3.59%'})								7	SOCIAL & CULTURAL IDENTITY
(1.86, {'2': '85.57%', '1': '14.43%'})	(1.67, {'2': '66.64%', '1': '33.36%'})	(1.86, {'2': '86.25%', '1': '13.75%'})	(1.72, {'2': '71.65%', '1': '28.35%'})	(1.58, {'2': '57.75%', '1': '42.25%'})	(1.78, {'2': '78.26%', '1': '21.74%'})	(1.57, {'2': '56.92%', '1': '43.08%'})	(1.68, {'2': '68.37%', '1': '31.63%'})	(1.34, {'1': '65.77%', '2': '34.23%'})								8	SOCIAL & CULTURAL IDENTITY
(1.4, {'1': '60.22%', '2': '39.78%'})	(1.55, {'2': '54.77%', '1': '45.23%'})	(1.54, {'2': '54.17%', '1': '45.83%'})	(1.64, {'2': '63.59%', '1': '36.41%'})	(1.56, {'2': '55.58%', '1': '44.42%'})	(1.54, {'2': '54.10%', '1': '45.90%'})	(1.35, {'1': '65.17%', '2': '34.83%'})	(1.35, {'1': '64.91%', '2': '35.09%'})	(1.19, {'1': '81.04%', '2': '18.96%'})								9	SOCIAL & CULTURAL IDENTITY
(1.26, {'1': '74.23%', '2': '25.77%'})	(1.37, {'1': '63.31%', '2': '36.69%'})	(1.45, {'1': '55.42%', '2': '44.58%'})	(1.44, {'1': '55.69%', '2': '44.31%'})	(1.43, {'1': '56.92%', '2': '43.08%'})	(1.44, {'1': '55.85%', '2': '44.15%'})	(1.39, {'1': '61.42%', '2': '38.58%'})	(1.37, {'1': '63.13%', '2': '36.87%'})	(1.15, {'1': '84.52%', '2': '15.48%'})								10	SOCIAL & CULTURAL IDENTITY
(1.94, {'2': '94.16%', '1': '5.84%'})	(1.73, {'2': '72.85%', '1': '27.15%'})	(1.87, {'2': '87.25%', '1': '12.75%'})	(1.84, {'2': '83.62%', '1': '16.38%'})	(1.76, {'2': '75.67%', '1': '24.33%'})	(1.92, {'2': '91.81%', '1': '8.19%'})	(1.84, {'2': '83.75%', '1': '16.25%'})	(1.81, {'2': '80.83%', '1': '19.17%'})	(1.54, {'2': '54.03%', '1': '45.97%'})								11	SOCIAL & CULTURAL IDENTITY
(1.22, {'1': '78.15%', '2': '21.85%'})	(1.6, {'2': '59.51%', '1': '40.49%'})	(1.28, {'1': '72.17%', '2': '27.83%'})	(1.33, {'1': '67.00%', '2': '33.00%'})	(1.35, {'1': '65.00%', '2': '35.00%'})	(1.31, {'1': '68.73%', '2': '31.27%'})	(1.49, {'1': '50.75%', '2': '49.25%'})	(1.33, {'1': '66.62%', '2': '33.38%'})	(1.18, {'1': '82.40%', '2': '17.60%'})								12	SOCIAL & CULTURAL IDENTITY
(1.78, {'2': '78.15%', '1': '21.85%'})	(1.74, {'2': '74.25%', '1': '25.75%'})	(1.82, {'2': '81.67%', '1': '18.33%'})	(1.83, {'2': '83.29%', '1': '16.71%'})	(1.65, {'2': '65.33%', '1': '34.67%'})	(1.81, {'2': '81.02%', '1': '18.98%'})	(1.83, {'2': '82.67%', '1': '17.33%'})	(1.61, {'2': '60.68%', '1': '39.32%'})	(1.35, {'1': '65.13%', '2': '34.87%'})								13	SOCIAL & CULTURAL IDENTITY
(1.89, {'2': '89.24%', '1': '10.76%'})	(1.43, {'1': '57.17%', '2': '42.83%'})	(1.78, {'2': '78.50%', '1': '21.50%'})	(1.81, {'2': '81.13%', '1': '18.87%'})	(1.69, {'2': '69.08%', '1': '30.92%'})	(1.87, {'2': '87.21%', '1': '12.79%'})	(1.69, {'2': '69.00%', '1': '31.00%'})	(1.58, {'2': '58.13%', '1': '41.87%'})	(1.41, {'1': '58.64%', '2': '41.36%'})								14	SOCIAL & CULTURAL IDENTITY
(1.18, {'1': '81.73%', '2': '18.27%'})	(1.45, {'1': '54.50%', '2': '45.50%'})	(1.38, {'1': '62.33%', '2': '37.67%'})	(1.23, {'1': '77.22%', '2': '22.78%'})	(1.65, {'2': '64.67%', '1': '35.33%'})	(1.29, {'1': '70.65%', '2': '29.35%'})	(1.33, {'1': '67.17%', '2': '32.83%'})	(1.56, {'2': '55.57%', '1': '44.43%'})	(1.19, {'1': '81.09%', '2': '18.91%'})								15	SOCIAL & CULTURAL IDENTITY
(1.65, {'2': '65.22%', '1': '34.78%'})	(1.59, {'2': '59.17%', '1': '40.83%'})	(1.64, {'2': '63.83%', '1': '36.17%'})	(1.68, {'2': '68.50%', '1': '31.50%'})	(1.79, {'2': '78.92%', '1': '21.08%'})	(1.69, {'2': '69.23%', '1': '30.77%'})	(1.78, {'2': '77.58%', '1': '22.42%'})	(1.72, {'2': '71.93%', '1': '28.07%'})	(1.37, {'1': '62.54%', '2': '37.46%'})								16	SOCIAL & CULTURAL IDENTITY
(1.44, {'1': '55.71%', '2': '44.29%'})	(1.66, {'2': '65.71%', '1': '34.29%'})	(1.43, {'1': '56.58%', '2': '43.42%'})	(1.53, {'2': '53.12%', '1': '46.88%'})	(1.9, {'2': '90.17%', '1': '9.83%'})	(1.57, {'2': '56.94%', '1': '43.06%'})	(1.64, {'2': '63.75%', '1': '36.25%'})	(1.62, {'2': '62.04%', '1': '37.96%'})	(1.23, {'1': '76.51%', '2': '23.49%'})								17	SOCIAL & CULTURAL IDENTITY
(1.08, {'1': '92.33%', '2': '7.67%'})	(1.13, {'1': '87.19%', '2': '12.81%'})	(1.34, {'1': '66.08%', '2': '33.92%'})	(1.04, {'1': '96.43%', '2': '3.57%'})	(1.42, {'1': '58.42%', '2': '41.58%'})	(1.15, {'1': '84.95%', '2': '15.05%'})	(1.17, {'1': '83.17%', '2': '16.83%'})	(1.11, {'1': '89.49%', '2': '10.51%'})	(1.33, {'1': '67.32%', '2': '32.68%'})								18	SOCIAL & CULTURAL IDENTITY
(1.84, {'2': '83.50%', '1': '16.50%'})	(1.72, {'2': '72.38%', '1': '27.62%'})	(1.68, {'2': '68.17%', '1': '31.83%'})	(1.76, {'2': '75.64%', '1': '24.36%'})	(1.64, {'2': '64.08%', '1': '35.92%'})	(1.92, {'2': '91.56%', '1': '8.44%'})	(1.86, {'2': '86.50%', '1': '13.50%'})	(1.58, {'2': '58.12%', '1': '41.88%'})	(1.78, {'2': '78.10%', '1': '21.90%'})								19	SOCIAL & CULTURAL IDENTITY
(1.43, {'1': '56.83%', '2': '43.17%'})	(1.19, {'1': '81.45%', '2': '18.55%'})	(1.46, {'1': '53.92%', '2': '46.08%'})	(1.12, {'1': '87.61%', '2': '12.39%'})	(1.54, {'2': '54.25%', '1': '45.75%'})	(1.73, {'2': '73.16%', '1': '26.84%'})	(1.57, {'2': '57.42%', '1': '42.58%'})	(1.26, {'1': '73.77%', '2': '26.23%'})	(1.72, {'2': '71.82%', '1': '28.18%'})								20	SOCIAL & CULTURAL IDENTITY
(1.8, {'2': '80.00%', '1': '20.00%'})	(1.58, {'2': '58.17%', '1': '41.83%'})	(1.62, {'2': '61.50%', '1': '38.50%'})	(1.72, {'2': '72.40%', '1': '27.60%'})	(1.6, {'2': '59.83%', '1': '40.17%'})	(1.77, {'2': '76.76%', '1': '23.24%'})	(1.77, {'2': '76.83%', '1': '23.17%'})	(1.51, {'2': '50.60%', '1': '49.40%'})	(1.75, {'2': '75.00%', '1': '25.00%'})								21	SOCIAL & CULTURAL IDENTITY
(1.16, {'1': '84.00%', '2': '16.00%'})		(1.45, {'1': '55.08%', '2': '44.92%'})	(1.06, {'1': '93.77%', '2': '6.23%'})	(1.52, {'2': '52.33%', '1': '47.67%'})	(1.37, {'1': '62.63%', '2': '37.37%'})	(1.2, {'1': '79.92%', '2': '20.08%'})	(1.21, {'1': '78.54%', '2': '21.46%'})	(1.42, {'1': '57.85%', '2': '42.15%'})								22	SOCIAL & CULTURAL IDENTITY
(1.87, {'2': '86.58%', '1': '13.42%'})	(1.66, {'2': '66.18%', '1': '33.82%'})	(1.65, {'2': '65.25%', '1': '34.75%'})	(1.76, {'2': '76.39%', '1': '23.61%'})	(1.69, {'2': '68.83%', '1': '31.17%'})	(1.8, {'2': '80.02%', '1': '19.98%'})	(1.76, {'2': '76.33%', '1': '23.67%'})	(1.58, {'2': '57.64%', '1': '42.36%'})	(1.66, {'2': '65.86%', '1': '34.14%'})								23	SOCIAL & CULTURAL IDENTITY
(1.12, {'1': '87.67%', '2': '12.33%'})	(1.1, {'1': '90.39%', '2': '9.61%'})	(1.42, {'1': '57.67%', '2': '42.33%'})	(1.08, {'1': '92.10%', '2': '7.90%'})	(1.5, {'2': '50.00%', '1': '50.00%'})	(1.43, {'1': '56.69%', '2': '43.31%'})	(1.22, {'1': '77.83%', '2': '22.17%'})	(1.26, {'1': '74.08%', '2': '25.92%'})	(1.31, {'1': '69.11%', '2': '30.89%'})								24	SOCIAL & CULTURAL IDENTITY
	(1.24, {'1': '76.05%', '2': '23.95%'})	(1.49, {'1': '51.33%', '2': '48.67%'})	(1.19, {'1': '81.30%', '2': '18.70%'})	(1.59, {'2': '58.67%', '1': '41.33%'})	(1.61, {'2': '61.29%', '1': '38.71%'})	(1.41, {'1': '59.00%', '2': '41.00%'})	(1.42, {'1': '57.78%', '2': '42.22%'})	(1.4, {'1': '59.64%', '2': '40.36%'})								25	SOCIAL & CULTURAL IDENTITY
(1.74, {'2': '74.33%', '1': '25.67%'})	(1.69, {'2': '68.65%', '1': '31.35%'})	(1.6, {'2': '59.75%', '1': '40.25%'})	(1.77, {'2': '77.14%', '1': '22.86%'})	(1.7, {'2': '69.67%', '1': '30.33%'})	(1.91, {'2': '91.30%', '1': '8.70%'})	(1.83, {'2': '83.08%', '1': '16.92%'})	(1.63, {'2': '63.06%', '1': '36.94%'})	(1.76, {'2': '75.82%', '1': '24.18%'})								26	SOCIAL & CULTURAL IDENTITY
(1.16, {'1': '84.42%', '2': '15.49%', '3': '0.08%'})	(1.55, {'1': '49.23%', '2': '47.43%', '3': '2.67%', '4': '0.67%'})	(1.08, {'1': '92.25%', '2': '7.75%'})	(1.14, {'1': '87.66%', '2': '11.15%', '3': '1.02%', '4': '0.17%'})	(1.3, {'1': '74.17%', '2': '23.00%', '3': '1.92%', '4': '0.92%'})	(1.08, {'1': '92.77%', '2': '6.81%', '4': '0.25%', '3': '0.17%'})	(1.41, {'1': '67.00%', '2': '26.42%', '3': '5.33%', '4': '1.25%'})	(1.62, {'1': '50.33%', '2': '38.86%', '3': '9.39%', '4': '1.42%'})	(1.24, {'1': '77.78%', '2': '20.22%', '3': '1.75%', '4': '0.25%'})								27	SOCIAL & CULTURAL IDENTITY
(1.84, {'1': '42.34%', '2': '34.93%', '3': '18.77%', '4': '3.96%'})	(2.34, {'2': '35.93%', '3': '35.46%', '1': '19.48%', '4': '9.13%'})	(2.13, {'1': '33.78%', '2': '30.26%', '3': '25.23%', '4': '10.73%'})	(1.67, {'1': '52.21%', '2': '32.36%', '3': '12.09%', '4': '3.34%'})	(2.28, {'2': '42.65%', '3': '24.52%', '1': '20.82%', '4': '12.01%'})	(2.18, {'2': '38.72%', '3': '26.88%', '1': '25.87%', '4': '8.54%'})	(2.02, {'2': '38.45%', '1': '31.69%', '3': '26.11%', '4': '3.75%'})	(2.45, {'2': '39.41%', '3': '35.66%', '1': '13.59%', '4': '11.33%'})	(1.95, {'1': '37.61%', '2': '33.86%', '3': '24.52%', '4': '4.00%'})								28	SOCIAL & CULTURAL IDENTITY
(1.74, {'1': '46.63%', '2': '36.40%', '3': '13.64%', '4': '3.32%'})	(2.38, {'2': '34.47%', '3': '30.66%', '1': '20.87%', '4': '14.00%'})	(1.9, {'1': '47.73%', '2': '23.82%', '3': '19.44%', '4': '9.01%'})	(1.87, {'1': '47.05%', '2': '24.87%', '3': '22.09%', '4': '5.99%'})	(2.6, {'3': '32.16%', '2': '31.32%', '4': '21.41%', '1': '15.11%'})	(1.87, {'1': '45.22%', '2': '28.23%', '3': '20.46%', '4': '6.09%'})	(2.52, {'3': '43.92%', '2': '24.58%', '1': '18.17%', '4': '13.33%'})	(2.44, {'2': '39.68%', '3': '35.45%', '1': '13.83%', '4': '11.04%'})	(2.21, {'1': '31.38%', '3': '30.79%', '2': '27.03%', '4': '10.79%'})								29	SOCIAL & CULTURAL IDENTITY
(3.0, {'4': '44.83%', '3': '24.66%', '2': '15.85%', '1': '14.66%'})	(2.54, {'3': '32.75%', '2': '28.44%', '4': '19.88%', '1': '18.94%'})	(2.84, {'3': '34.42%', '4': '34.00%', '1': '18.71%', '2': '12.87%'})	(2.99, {'3': '39.02%', '4': '36.52%', '1': '13.39%', '2': '11.06%'})	(3.33, {'4': '52.35%', '3': '32.50%', '2': '11.31%', '1': '3.85%'})	(2.78, {'3': '45.06%', '4': '24.05%', '2': '15.78%', '1': '15.11%'})	(3.02, {'3': '47.92%', '4': '31.67%', '2': '11.67%', '1': '8.75%'})	(2.88, {'3': '39.79%', '4': '27.53%', '2': '25.71%', '1': '6.98%'})	(2.9, {'3': '47.58%', '4': '27.50%', '2': '12.75%', '1': '12.17%'})								30	SOCIAL & CULTURAL IDENTITY
(1.93, {'2': '37.52%', '1': '37.44%', '3': '19.27%', '4': '5.77%'})	(2.49, {'3': '33.99%', '2': '32.23%', '1': '17.67%', '4': '16.12%'})	(2.08, {'1': '39.80%', '2': '25.08%', '3': '22.74%', '4': '12.37%'})	(2.26, {'3': '32.92%', '1': '29.08%', '2': '27.08%', '4': '10.92%'})	(2.79, {'3': '37.84%', '4': '25.84%', '2': '25.67%', '1': '10.65%'})	(2.23, {'3': '30.28%', '2': '29.86%', '1': '28.84%', '4': '11.03%'})	(2.64, {'3': '42.50%', '2': '22.67%', '4': '18.67%', '1': '16.17%'})	(2.53, {'3': '38.93%', '2': '36.93%', '4': '12.66%', '1': '11.49%'})	(2.47, {'3': '41.47%', '1': '23.24%', '2': '20.65%', '4': '14.63%'})								31	SOCIAL & CULTURAL IDENTITY
(1.8, {'2': '42.65%', '1': '39.68%', '3': '15.55%', '4': '2.12%'})	(2.01, {'2': '54.31%', '1': '23.81%', '3': '18.46%', '4': '3.41%'})	(1.88, {'1': '47.50%', '2': '25.52%', '3': '18.88%', '4': '8.10%'})	(1.94, {'1': '37.84%', '2': '34.56%', '3': '23.24%', '4': '4.36%'})	(2.49, {'2': '34.99%', '3': '34.65%', '1': '15.60%', '4': '14.76%'})	(1.83, {'1': '43.73%', '2': '35.55%', '3': '14.66%', '4': '6.05%'})	(2.24, {'2': '37.83%', '3': '28.92%', '1': '23.67%', '4': '9.58%'})	(2.24, {'2': '45.71%', '3': '28.29%', '1': '18.67%', '4': '7.33%'})	(1.99, {'2': '41.20%', '1': '31.94%', '3': '22.27%', '4': '4.59%'})								32	SOCIAL & CULTURAL IDENTITY
(1.5, {'1': '67.53%', '2': '22.04%', '3': '4.67%', '4': '4.59%', '5': '1.17%'})	(2.14, {'1': '40.23%', '2': '29.59%', '4': '16.73%', '3': '9.91%', '5': '3.55%'})	(1.78, {'1': '61.06%', '2': '17.42%', '3': '8.79%', '4': '8.38%', '5': '4.36%'})	(1.75, {'1': '58.99%', '2': '22.55%', '4': '9.32%', '3': '6.24%', '5': '2.91%'})	(2.41, {'2': '32.25%', '1': '29.42%', '3': '15.00%', '4': '14.33%', '5': '9.00%'})	(1.96, {'1': '50.71%', '2': '23.34%', '4': '13.60%', '3': '8.56%', '5': '3.78%'})	(2.58, {'1': '30.83%', '4': '27.08%', '2': '25.33%', '5': '9.00%', '3': '7.75%'})	(2.64, {'2': '34.33%', '3': '21.79%', '1': '17.86%', '4': '17.74%', '5': '8.28%'})	(2.14, {'1': '41.06%', '2': '23.59%', '3': '19.29%', '4': '12.09%', '5': '3.97%'})								33	SOCIAL & CULTURAL IDENTITY
(1.15, {'1': '89.57%', '2': '5.76%', '3': '4.67%'})	(1.4, {'1': '69.81%', '2': '20.28%', '3': '9.91%'})	(1.3, {'1': '78.48%', '2': '12.73%', '3': '8.79%'})	(1.25, {'1': '81.53%', '2': '12.23%', '3': '6.24%'})	(1.53, {'1': '61.67%', '2': '23.33%', '3': '15.00%'})	(1.35, {'1': '74.06%', '2': '17.38%', '3': '8.56%'})	(1.52, {'1': '56.17%', '2': '36.08%', '3': '7.75%'})	(1.7, {'1': '52.20%', '2': '26.01%', '3': '21.79%'})	(1.55, {'1': '64.65%', '3': '19.29%', '2': '16.06%'})								34	SOCIAL & CULTURAL IDENTITY
(1.25, {'1': '78.89%', '2': '18.58%', '3': '1.60%', '4': '0.76%', '5': '0.17%'})	(1.54, {'1': '64.84%', '2': '25.88%', '4': '5.07%', '5': '2.20%', '3': '2.00%'})	(1.4, {'1': '72.11%', '2': '17.34%', '3': '9.30%', '4': '0.84%', '5': '0.42%'})	(1.35, {'1': '76.29%', '2': '16.97%', '3': '3.24%', '4': '2.91%', '5': '0.58%'})	(1.47, {'1': '65.42%', '2': '25.67%', '3': '6.08%', '4': '1.83%', '5': '1.00%'})	(1.42, {'1': '72.38%', '2': '18.98%', '3': '4.03%', '4': '3.95%', '5': '0.67%'})	(2.03, {'1': '40.92%', '2': '33.25%', '3': '11.17%', '4': '10.83%', '5': '3.83%'})	(2.24, {'1': '33.38%', '2': '31.81%', '3': '18.91%', '4': '9.01%', '5': '6.90%'})	(1.42, {'1': '71.81%', '2': '17.99%', '3': '6.88%', '4': '2.74%', '5': '0.58%'})								35	SOCIAL & CULTURAL IDENTITY
(1.04, {'1': '97.47%', '3': '1.60%', '2': '0.93%'})	(1.11, {'1': '90.73%', '2': '7.27%', '3': '2.00%'})	(1.2, {'1': '89.45%', '3': '9.30%', '2': '1.26%'})	(1.1, {'1': '93.26%', '2': '3.49%', '3': '3.24%'})	(1.15, {'1': '91.08%', '3': '6.08%', '2': '2.83%'})	(1.13, {'1': '91.35%', '2': '4.62%', '3': '4.03%'})	(1.37, {'1': '74.17%', '2': '14.67%', '3': '11.17%'})	(1.54, {'1': '65.19%', '3': '18.91%', '2': '15.91%'})	(1.17, {'1': '89.80%', '3': '6.88%', '2': '3.32%'})								36	SOCIAL & CULTURAL IDENTITY
(2.38, {'1': '32.15%', '2': '25.19%', '4': '20.19%', '3': '18.74%', '5': '3.73%'})	(2.71, {'2': '33.47%', '4': '25.64%', '3': '18.07%', '1': '16.80%', '5': '6.02%'})	(2.61, {'1': '29.14%', '4': '23.70%', '3': '20.22%', '2': '19.54%', '5': '7.39%'})	(2.49, {'2': '29.02%', '1': '27.25%', '4': '21.36%', '3': '16.57%', '5': '5.80%'})	(3.06, {'3': '29.36%', '2': '25.34%', '4': '23.24%', '5': '13.00%', '1': '9.06%'})	(2.88, {'4': '33.22%', '1': '20.49%', '2': '19.65%', '3': '18.97%', '5': '7.67%'})	(2.73, {'2': '28.33%', '4': '27.42%', '3': '19.25%', '1': '18.92%', '5': '6.08%'})	(2.81, {'2': '33.47%', '3': '30.94%', '4': '17.60%', '1': '9.82%', '5': '8.17%'})	(2.56, {'3': '35.13%', '1': '23.42%', '2': '20.85%', '4': '17.77%', '5': '2.82%'})								37	SOCIAL & CULTURAL IDENTITY
(1.61, {'1': '57.34%', '2': '23.92%', '3': '18.74%'})	(1.68, {'1': '50.27%', '2': '31.66%', '3': '18.07%'})	(1.72, {'1': '48.68%', '2': '31.10%', '3': '20.22%'})	(1.6, {'1': '56.27%', '2': '27.17%', '3': '16.57%'})	(1.95, {'2': '36.24%', '1': '34.40%', '3': '29.36%'})	(1.79, {'2': '40.89%', '1': '40.13%', '3': '18.97%'})	(1.72, {'1': '47.25%', '2': '33.50%', '3': '19.25%'})	(1.88, {'1': '43.29%', '3': '30.94%', '2': '25.77%'})	(1.91, {'1': '44.27%', '3': '35.13%', '2': '20.60%'})								38	SOCIAL & CULTURAL IDENTITY
					(3.87, {'5': '41.50%', '4': '31.65%', '1': '9.58%', '2': '8.68%', '3': '8.59%'})		(3.68, {'5': '31.62%', '4': '25.98%', '3': '24.75%', '2': '14.49%', '1': '3.17%'})									39	SOCIAL & CULTURAL IDENTITY
(2.24, {'2': '34.18%', '1': '32.32%', '3': '15.18%', '4': '13.99%', '5': '4.33%'})	(2.39, {'2': '46.89%', '1': '20.37%', '4': '17.77%', '3': '10.69%', '5': '4.28%'})	(1.66, {'1': '56.24%', '2': '28.75%', '3': '8.13%', '4': '6.29%', '5': '0.59%'})	(1.74, {'1': '51.00%', '2': '32.72%', '3': '8.35%', '4': '7.10%', '5': '0.83%'})	(2.32, {'2': '35.83%', '1': '27.25%', '3': '18.33%', '4': '14.42%', '5': '4.17%'})	(1.84, {'1': '47.18%', '2': '33.73%', '3': '9.59%', '4': '7.40%', '5': '2.10%'})	(2.59, {'2': '30.00%', '1': '24.17%', '4': '23.25%', '3': '15.50%', '5': '7.08%'})	(2.6, {'2': '38.25%', '3': '29.48%', '4': '14.23%', '1': '12.92%', '5': '5.12%'})	(1.94, {'1': '45.30%', '2': '24.98%', '3': '21.48%', '4': '7.08%', '5': '1.17%'})								40	SOCIAL & CULTURAL IDENTITY
(1.21, {'1': '81.57%', '2': '16.35%', '3': '1.67%', '4': '0.33%', '5': '0.08%'})	(2.52, {'2': '34.74%', '3': '24.85%', '1': '19.51%', '4': '16.03%', '5': '4.88%'})	(1.28, {'1': '78.00%', '2': '15.75%', '3': '6.17%', '4': '0.08%'})	(1.28, {'1': '77.89%', '2': '17.87%', '3': '2.83%', '4': '1.25%', '5': '0.17%'})	(1.76, {'1': '52.58%', '2': '30.17%', '3': '9.25%', '4': '5.00%', '5': '3.00%'})	(1.26, {'1': '78.69%', '2': '18.04%', '3': '2.43%', '4': '0.67%', '5': '0.17%'})	(1.68, {'1': '53.92%', '2': '31.33%', '3': '8.50%', '4': '5.17%', '5': '1.08%'})	(1.89, {'1': '40.94%', '2': '36.04%', '3': '17.53%', '4': '4.22%', '5': '1.27%'})	(1.35, {'1': '72.14%', '2': '21.64%', '3': '4.98%', '4': '1.16%', '5': '0.08%'})								41	SOCIAL & CULTURAL IDENTITY
(1.69, {'1': '47.95%', '2': '40.85%', '3': '7.02%', '4': '2.67%', '5': '1.50%'})	(2.06, {'2': '46.16%', '1': '32.93%', '4': '12.49%', '3': '5.88%', '5': '2.54%'})	(1.54, {'1': '63.54%', '2': '21.79%', '3': '12.32%', '4': '1.59%', '5': '0.75%'})	(1.48, {'1': '66.14%', '2': '25.62%', '4': '4.66%', '3': '2.83%', '5': '0.75%'})	(2.05, {'1': '38.50%', '2': '37.17%', '3': '11.42%', '5': '6.50%', '4': '6.42%'})	(1.56, {'1': '60.82%', '2': '28.61%', '3': '5.12%', '4': '4.61%', '5': '0.84%'})	(1.85, {'1': '46.33%', '2': '34.83%', '4': '8.92%', '3': '8.25%', '5': '1.67%'})	(2.1, {'2': '49.03%', '1': '24.79%', '3': '18.95%', '4': '5.88%', '5': '1.34%'})	(1.76, {'1': '48.47%', '2': '31.48%', '3': '16.07%', '4': '3.56%', '5': '0.41%'})								42	SOCIAL & CULTURAL IDENTITY
(1.41, {'1': '65.33%', '2': '29.07%', '3': '4.85%', '4': '0.75%'})	(1.97, {'2': '53.28%', '1': '29.55%', '3': '9.36%', '4': '6.35%', '5': '1.47%'})	(1.36, {'1': '72.37%', '2': '20.78%', '3': '5.34%', '4': '1.34%', '5': '0.17%'})	(1.33, {'1': '71.07%', '2': '26.10%', '3': '1.83%', '4': '0.83%', '5': '0.17%'})	(1.91, {'1': '41.17%', '2': '37.83%', '3': '12.08%', '4': '6.83%', '5': '2.08%'})	(1.42, {'1': '66.64%', '2': '26.74%', '3': '4.53%', '4': '1.76%', '5': '0.34%'})	(2.1, {'1': '38.83%', '2': '31.00%', '4': '13.92%', '3': '13.75%', '5': '2.50%'})	(2.24, {'2': '46.86%', '3': '22.97%', '1': '20.31%', '4': '8.39%', '5': '1.47%'})	(1.45, {'1': '64.65%', '2': '27.48%', '3': '6.46%', '4': '1.08%', '5': '0.33%'})								43	SOCIAL & CULTURAL IDENTITY
(1.5, {'1': '61.84%', '2': '31.00%', '3': '3.79%', '4': '2.36%', '5': '1.01%'})	(2.67, {'2': '41.85%', '4': '28.37%', '3': '13.21%', '1': '13.15%', '5': '3.42%'})	(1.54, {'1': '60.76%', '2': '25.74%', '3': '12.07%', '4': '1.35%', '5': '0.08%'})	(1.69, {'1': '51.37%', '2': '36.30%', '4': '6.08%', '3': '5.50%', '5': '0.75%'})	(2.02, {'2': '44.17%', '1': '31.50%', '3': '17.17%', '4': '5.25%', '5': '1.92%'})	(1.85, {'1': '47.11%', '2': '32.77%', '4': '9.97%', '3': '9.22%', '5': '0.92%'})	(2.36, {'2': '31.42%', '1': '29.83%', '4': '20.33%', '3': '14.92%', '5': '3.50%'})	(2.58, {'2': '40.63%', '3': '28.06%', '4': '13.84%', '1': '12.48%', '5': '4.99%'})	(1.73, {'1': '51.33%', '2': '32.34%', '3': '8.87%', '4': '6.97%', '5': '0.50%'})								44	SOCIAL & CULTURAL IDENTITY
(1.82, {'2': '70.02%', '1': '24.07%', '3': '5.91%'})	(2.42, {'3': '50.61%', '2': '41.06%', '1': '8.33%'})	(1.94, {'2': '65.67%', '1': '20.25%', '3': '14.08%'})	(1.97, {'2': '78.91%', '1': '11.85%', '3': '9.24%'})	(1.71, {'2': '60.79%', '1': '33.86%', '3': '5.35%'})	(2.0, {'2': '81.66%', '3': '9.17%', '1': '9.17%'})	(1.7, {'2': '54.50%', '1': '37.75%', '3': '7.75%'})	(1.92, {'2': '59.09%', '1': '24.42%', '3': '16.48%'})	(1.84, {'2': '69.32%', '1': '23.55%', '3': '7.12%'})								45	SOCIAL & CULTURAL IDENTITY
(2.84, {'3': '90.52%', '1': '6.40%', '2': '3.07%'})	(2.62, {'3': '77.54%', '1': '15.74%', '2': '6.72%'})	(2.4, {'3': '64.85%', '1': '25.28%', '2': '9.87%'})	(2.29, {'3': '62.00%', '1': '32.55%', '2': '5.45%'})	(2.26, {'3': '59.08%', '1': '33.53%', '2': '7.39%'})	(2.61, {'3': '78.23%', '1': '17.72%', '2': '4.05%'})	(2.44, {'3': '70.25%', '1': '25.92%', '2': '3.83%'})	(1.94, {'1': '39.79%', '3': '34.23%', '2': '25.98%'})	(2.37, {'3': '63.14%', '1': '26.54%', '2': '10.32%'})								46	SOCIAL & CULTURAL IDENTITY
(1.17, {'1': '87.85%', '2': '7.11%', '3': '5.04%'})	(1.17, {'1': '87.18%', '2': '8.50%', '3': '4.32%'})	(1.18, {'1': '85.28%', '2': '11.42%', '3': '3.30%'})	(1.23, {'1': '85.89%', '3': '9.32%', '2': '4.79%'})	(1.28, {'1': '80.38%', '2': '10.85%', '3': '8.76%'})	(1.1, {'1': '93.00%', '2': '3.79%', '3': '3.20%'})	(1.33, {'1': '76.92%', '2': '13.00%', '3': '10.08%'})	(1.58, {'1': '55.23%', '2': '31.91%', '3': '12.86%'})	(1.26, {'1': '78.96%', '2': '16.25%', '3': '4.80%'})								47	SOCIAL & CULTURAL IDENTITY
(1.31, {'1': '75.82%', '2': '17.34%', '3': '6.84%'})	(1.77, {'1': '44.32%', '2': '34.70%', '3': '20.98%'})	(1.25, {'1': '77.02%', '2': '20.65%', '3': '2.32%'})	(1.17, {'1': '87.43%', '2': '7.80%', '3': '4.78%'})	(1.33, {'1': '75.17%', '2': '16.89%', '3': '7.94%'})	(1.19, {'1': '85.54%', '2': '10.33%', '3': '4.13%'})	(1.51, {'1': '63.25%', '2': '22.75%', '3': '14.00%'})	(1.76, {'2': '43.71%', '1': '40.03%', '3': '16.25%'})	(1.46, {'1': '61.47%', '2': '30.82%', '3': '7.71%'})								48	SOCIAL & CULTURAL IDENTITY
(2.27, {'2': '65.30%', '3': '22.77%', '1': '6.42%', '4': '5.50%'})	(2.22, {'2': '51.30%', '3': '20.31%', '1': '18.37%', '4': '10.02%'})	(2.21, {'2': '52.16%', '3': '19.68%', '1': '18.24%', '4': '9.92%'})	(1.92, {'2': '62.72%', '1': '24.10%', '3': '10.01%', '4': '3.17%'})	(1.97, {'2': '67.50%', '1': '18.58%', '3': '12.25%', '4': '1.67%'})	(1.74, {'2': '55.92%', '1': '36.10%', '3': '5.96%', '4': '2.02%'})	(2.06, {'2': '70.42%', '3': '16.25%', '1': '12.42%', '4': '0.92%'})	(1.94, {'2': '62.94%', '1': '22.35%', '3': '12.71%', '4': '1.99%'})	(2.11, {'2': '61.36%', '3': '19.90%', '1': '15.34%', '4': '3.40%'})								49	INDIVIDUAL WELLBEING & DEVELOPMENT
(2.43, {'2': '50.33%', '3': '31.42%', '1': '8.92%', '4': '7.83%', '5': '1.50%'})	(2.15, {'2': '44.93%', '3': '28.84%', '1': '22.63%', '4': '2.47%', '5': '1.13%'})	(2.4, {'2': '38.25%', '3': '27.67%', '1': '19.92%', '4': '10.58%', '5': '3.58%'})	(1.85, {'1': '40.68%', '2': '40.10%', '3': '13.98%', '4': '4.33%', '5': '0.92%'})	(2.09, {'2': '46.92%', '1': '24.83%', '3': '23.50%', '4': '3.92%', '5': '0.83%'})	(1.66, {'1': '49.08%', '2': '38.46%', '3': '10.45%', '4': '1.42%', '5': '0.59%'})	(2.37, {'2': '45.08%', '3': '36.17%', '1': '12.75%', '4': '4.83%', '5': '1.17%'})	(2.16, {'2': '57.07%', '3': '23.69%', '1': '15.59%', '4': '3.16%', '5': '0.50%'})	(2.54, {'3': '39.05%', '2': '38.72%', '1': '10.53%', '4': '9.87%', '5': '1.82%'})								50	INDIVIDUAL WELLBEING & DEVELOPMENT
(6.54, {'7': '19.71%', '5': '17.33%', '8': '15.97%', '6': '11.98%', '10': '11.21%', '9': '8.16%', '4': '5.95%', '3': '4.67%', '1': '3.91%', '2': '1.10%'})	(6.92, {'10': '22.86%', '5': '22.25%', '8': '19.50%', '7': '12.33%', '6': '7.10%', '1': '5.29%', '9': '4.83%', '4': '2.68%', '3': '1.88%', '2': '1.27%'})	(6.78, {'5': '17.67%', '8': '15.92%', '6': '15.17%', '10': '15.00%', '7': '13.00%', '9': '10.83%', '4': '4.17%', '1': '3.17%', '3': '3.08%', '2': '2.00%'})	(7.37, {'10': '24.69%', '8': '18.29%', '7': '15.46%', '5': '14.21%', '9': '9.48%', '6': '9.48%', '4': '3.24%', '1': '2.49%', '3': '1.50%', '2': '1.16%'})	(5.88, {'8': '20.33%', '7': '16.00%', '5': '12.00%', '6': '11.75%', '4': '10.50%', '3': '8.83%', '2': '7.42%', '9': '6.58%', '10': '3.75%', '1': '2.83%'})	(7.6, {'10': '31.30%', '8': '16.81%', '7': '14.15%', '5': '12.95%', '6': '10.38%', '9': '7.46%', '4': '2.32%', '3': '1.80%', '2': '1.72%', '1': '1.11%'})	(6.81, {'7': '20.83%', '8': '17.92%', '6': '16.08%', '10': '13.58%', '5': '10.42%', '9': '7.50%', '4': '5.50%', '3': '3.83%', '2': '2.25%', '1': '2.08%'})	(6.65, {'8': '18.65%', '7': '17.77%', '5': '15.64%', '6': '13.89%', '10': '11.96%', '9': '7.57%', '4': '6.40%', '3': '3.85%', '1': '3.18%', '2': '1.09%'})	(6.18, {'5': '18.21%', '8': '13.91%', '7': '13.41%', '10': '12.91%', '6': '11.01%', '9': '7.28%', '4': '7.12%', '3': '5.88%', '1': '5.79%', '2': '4.47%'})								51	INDIVIDUAL WELLBEING & DEVELOPMENT
(5.87, {'5': '21.47%', '7': '14.95%', '6': '14.29%', '8': '11.70%', '4': '9.19%', '10': '7.27%', '3': '6.85%', '9': '6.10%', '1': '5.76%', '2': '2.42%'})	(6.2, {'5': '18.83%', '8': '16.29%', '10': '13.22%', '6': '12.75%', '7': '12.22%', '1': '9.41%', '9': '6.34%', '3': '4.67%', '4': '4.21%', '2': '2.07%'})	(4.46, {'5': '29.75%', '4': '24.67%', '3': '20.92%', '2': '5.33%', '1': '4.25%', '8': '3.92%', '7': '3.75%', '10': '3.08%', '9': '2.33%', '6': '2.00%'})	(6.87, {'10': '19.62%', '7': '17.29%', '5': '16.38%', '8': '14.96%', '6': '9.98%', '9': '8.15%', '1': '4.24%', '4': '4.07%', '3': '3.66%', '2': '1.66%'})	(6.68, {'7': '36.00%', '6': '26.83%', '8': '18.92%', '9': '5.25%', '3': '3.00%', '5': '2.50%', '4': '2.33%', '10': '2.08%', '2': '2.00%', '1': '1.08%'})	(7.93, {'10': '39.76%', '8': '12.60%', '5': '10.97%', '7': '10.54%', '9': '9.77%', '6': '9.68%', '4': '2.49%', '3': '2.06%', '2': '1.63%', '1': '0.51%'})	(6.68, {'7': '19.50%', '6': '17.50%', '8': '16.42%', '5': '11.25%', '10': '11.08%', '9': '9.75%', '3': '5.33%', '4': '4.67%', '1': '3.17%', '2': '1.33%'})	(6.52, {'7': '22.37%', '8': '19.58%', '6': '16.42%', '5': '14.93%', '4': '7.78%', '9': '6.99%', '10': '5.70%', '3': '3.66%', '1': '1.70%', '2': '0.87%'})	(5.52, {'5': '19.88%', '7': '13.50%', '6': '12.68%', '4': '10.94%', '8': '9.44%', '1': '8.86%', '10': '7.54%', '3': '7.21%', '9': '5.30%', '2': '4.64%'})								52	INDIVIDUAL WELLBEING & DEVELOPMENT
(4.69, {'5': '19.93%', '1': '13.76%', '3': '12.51%', '6': '12.01%', '7': '11.59%', '4': '11.18%', '2': '6.76%', '8': '6.34%', '10': '3.00%', '9': '2.92%'})	(5.55, {'5': '26.22%', '6': '12.88%', '7': '12.14%', '8': '11.21%', '1': '10.01%', '4': '9.67%', '10': '6.60%', '9': '4.34%', '3': '3.94%', '2': '3.00%'})	(4.45, {'5': '29.58%', '4': '24.92%', '3': '20.58%', '7': '5.42%', '2': '5.25%', '1': '4.00%', '8': '3.83%', '6': '2.33%', '10': '2.25%', '9': '1.83%'})	(5.42, {'5': '22.11%', '7': '13.05%', '1': '11.22%', '6': '10.81%', '8': '10.14%', '10': '8.23%', '4': '7.48%', '3': '7.32%', '2': '5.49%', '9': '4.16%'})	(5.11, {'5': '17.50%', '6': '15.08%', '7': '15.00%', '4': '12.08%', '8': '10.92%', '3': '10.42%', '2': '9.25%', '1': '5.83%', '9': '2.33%', '10': '1.58%'})	(6.53, {'10': '20.22%', '5': '18.96%', '6': '14.91%', '7': '11.95%', '8': '11.68%', '2': '6.29%', '4': '5.57%', '3': '5.30%', '9': '4.22%', '1': '0.90%'})	(6.24, {'6': '23.83%', '5': '16.58%', '8': '15.25%', '7': '14.08%', '10': '7.50%', '4': '6.67%', '9': '6.08%', '3': '4.42%', '1': '3.50%', '2': '2.08%'})	(5.89, {'7': '22.64%', '5': '18.85%', '6': '17.81%', '8': '13.61%', '4': '10.53%', '3': '5.99%', '9': '3.54%', '1': '3.16%', '10': '2.16%', '2': '1.71%'})	(4.59, {'5': '18.84%', '1': '14.52%', '4': '11.45%', '6': '11.04%', '3': '10.87%', '7': '10.46%', '2': '9.96%', '8': '6.72%', '10': '3.32%', '9': '2.82%'})								53	INDIVIDUAL WELLBEING & DEVELOPMENT
(3.36, {'4': '59.50%', '3': '20.75%', '2': '16.00%', '1': '3.75%'})	(3.32, {'4': '54.81%', '3': '26.44%', '2': '14.75%', '1': '4.01%'})	(3.35, {'4': '54.67%', '3': '31.30%', '2': '8.85%', '1': '5.18%'})	(3.42, {'4': '67.61%', '3': '13.41%', '2': '12.57%', '1': '6.41%'})	(3.77, {'4': '82.33%', '3': '12.67%', '2': '4.25%', '1': '0.75%'})	(3.26, {'4': '55.47%', '3': '21.46%', '2': '16.25%', '1': '6.82%'})	(3.52, {'4': '69.58%', '3': '15.50%', '2': '12.17%', '1': '2.75%'})	(3.51, {'4': '63.80%', '3': '24.43%', '2': '10.40%', '1': '1.38%'})	(3.4, {'4': '64.48%', '3': '15.77%', '2': '14.52%', '1': '5.23%'})								54	INDIVIDUAL WELLBEING & DEVELOPMENT
(3.52, {'4': '67.89%', '3': '19.02%', '2': '10.18%', '1': '2.92%'})	(3.53, {'4': '65.33%', '3': '24.45%', '2': '7.88%', '1': '2.34%'})	(2.93, {'4': '44.19%', '2': '21.04%', '3': '19.78%', '1': '14.98%'})	(3.64, {'4': '80.02%', '2': '8.24%', '3': '7.91%', '1': '3.83%'})	(3.61, {'4': '72.92%', '3': '16.67%', '2': '9.08%', '1': '1.33%'})	(3.14, {'4': '53.46%', '2': '19.06%', '3': '17.20%', '1': '10.29%'})	(3.44, {'4': '60.33%', '3': '25.67%', '2': '11.75%', '1': '2.25%'})	(3.35, {'4': '55.57%', '3': '27.81%', '2': '13.05%', '1': '3.57%'})	(3.32, {'4': '59.62%', '3': '18.57%', '2': '15.75%', '1': '6.05%'})								55	INDIVIDUAL WELLBEING & DEVELOPMENT
(2.85, {'4': '37.23%', '2': '26.29%', '3': '23.71%', '1': '12.77%'})	(2.99, {'4': '40.36%', '3': '27.84%', '2': '22.56%', '1': '9.24%'})	(2.84, {'4': '35.26%', '3': '27.37%', '2': '23.76%', '1': '13.60%'})	(3.47, {'4': '70.69%', '2': '14.32%', '3': '10.41%', '1': '4.58%'})	(3.67, {'4': '76.08%', '3': '15.42%', '2': '7.83%', '1': '0.67%'})	(2.93, {'4': '42.15%', '2': '24.10%', '3': '21.07%', '1': '12.68%'})	(3.18, {'4': '46.83%', '3': '28.75%', '2': '20.17%', '1': '4.25%'})	(3.39, {'4': '58.01%', '3': '24.87%', '2': '14.77%', '1': '2.34%'})	(3.06, {'4': '48.63%', '2': '24.98%', '3': '17.59%', '1': '8.80%'})								56	INDIVIDUAL WELLBEING & DEVELOPMENT
(3.09, {'4': '43.66%', '3': '26.63%', '2': '24.37%', '1': '5.34%'})	(2.83, {'4': '36.11%', '3': '25.97%', '2': '22.36%', '1': '15.55%'})	(2.81, {'4': '36.38%', '3': '24.06%', '2': '24.06%', '1': '15.51%'})	(3.27, {'4': '60.27%', '2': '18.36%', '3': '13.69%', '1': '7.68%'})	(3.62, {'4': '72.67%', '3': '17.58%', '2': '9.00%', '1': '0.75%'})	(2.89, {'4': '40.22%', '2': '25.61%', '3': '21.49%', '1': '12.68%'})	(3.26, {'4': '55.25%', '3': '20.25%', '2': '19.67%', '1': '4.83%'})	(2.65, {'2': '37.26%', '4': '28.48%', '3': '21.23%', '1': '13.03%'})	(3.16, {'4': '52.16%', '2': '21.23%', '3': '19.24%', '1': '7.38%'})								57	INDIVIDUAL WELLBEING & DEVELOPMENT
(3.77, {'4': '83.15%', '3': '11.34%', '2': '4.42%', '1': '1.08%'})	(3.6, {'4': '80.08%', '2': '7.89%', '3': '6.15%', '1': '5.88%'})	(3.19, {'4': '56.13%', '3': '18.57%', '2': '13.11%', '1': '12.18%'})	(3.82, {'4': '90.01%', '3': '4.50%', '2': '3.33%', '1': '2.16%'})	(3.78, {'4': '84.33%', '3': '10.42%', '2': '4.33%', '1': '0.92%'})	(3.74, {'4': '87.24%', '1': '5.31%', '3': '4.71%', '2': '2.74%'})	(3.72, {'4': '83.83%', '3': '6.92%', '2': '6.58%', '1': '2.67%'})	(3.56, {'4': '67.20%', '3': '23.78%', '2': '6.90%', '1': '2.13%'})	(3.59, {'4': '75.33%', '3': '11.21%', '2': '10.38%', '1': '3.07%'})								58	INDIVIDUAL WELLBEING & DEVELOPMENT
(1.83, {'2': '48.23%', '1': '34.18%', '3': '17.59%'})	(1.65, {'1': '57.62%', '3': '22.70%', '2': '19.68%'})	(2.2, {'3': '41.34%', '2': '37.22%', '1': '21.44%'})	(1.72, {'1': '46.93%', '2': '34.40%', '3': '18.67%'})	(1.89, {'1': '42.91%', '3': '31.76%', '2': '25.34%'})	(1.82, {'1': '50.73%', '3': '32.82%', '2': '16.45%'})	(1.77, {'1': '51.75%', '3': '28.75%', '2': '19.50%'})	(1.82, {'1': '46.13%', '3': '27.80%', '2': '26.07%'})	(1.61, {'1': '53.94%', '2': '31.07%', '3': '14.99%'})								59	INDIVIDUAL WELLBEING & DEVELOPMENT
(1.93, {'2': '92.65%', '1': '7.35%'})	(1.85, {'2': '85.16%', '1': '14.84%'})	(1.89, {'2': '88.76%', '1': '11.24%'})	(1.84, {'2': '84.03%', '1': '15.97%'})	(1.9, {'2': '90.08%', '1': '9.92%'})	(1.91, {'2': '90.73%', '1': '9.27%'})	(1.84, {'2': '83.50%', '1': '16.50%'})	(1.86, {'2': '85.74%', '1': '14.26%'})	(1.86, {'2': '85.75%', '1': '14.25%'})								60	SOCIAL & CULTURAL IDENTITY
(1.07, {'1': '93.42%', '2': '6.00%', '3': '0.42%', '4': '0.17%'})	(1.17, {'1': '85.39%', '2': '13.14%', '3': '0.80%', '4': '0.67%'})	(1.07, {'1': '94.50%', '2': '3.92%', '3': '1.42%', '4': '0.17%'})	(1.12, {'1': '90.02%', '2': '8.15%', '3': '1.50%', '4': '0.33%'})	(1.19, {'1': '84.50%', '2': '12.92%', '3': '1.50%', '4': '1.08%'})	(1.09, {'1': '92.13%', '2': '7.04%', '3': '0.75%', '4': '0.08%'})	(1.42, {'1': '65.83%', '2': '27.83%', '3': '4.58%', '4': '1.75%'})	(1.21, {'1': '82.68%', '2': '14.30%', '3': '2.69%', '4': '0.33%'})	(1.4, {'1': '72.19%', '2': '19.32%', '3': '4.91%', '4': '3.58%'})								61	SOCIAL & CULTURAL IDENTITY
(1.81, {'2': '49.87%', '1': '35.86%', '3': '11.68%', '4': '2.59%'})	(2.11, {'2': '61.29%', '1': '17.55%', '3': '13.53%', '4': '7.64%'})	(1.88, {'2': '45.64%', '1': '35.76%', '3': '13.23%', '4': '5.36%'})	(2.01, {'2': '52.35%', '1': '26.38%', '3': '14.91%', '4': '6.37%'})	(2.3, {'2': '56.89%', '3': '26.07%', '1': '10.19%', '4': '6.85%'})	(1.89, {'2': '52.52%', '1': '31.46%', '3': '11.49%', '4': '4.53%'})	(2.33, {'2': '51.83%', '3': '29.50%', '1': '11.42%', '4': '7.25%'})	(2.01, {'2': '62.08%', '1': '19.98%', '3': '14.49%', '4': '3.45%'})	(2.2, {'2': '52.49%', '3': '22.01%', '1': '17.69%', '4': '7.81%'})								62	SOCIAL & CULTURAL IDENTITY
(1.66, {'1': '46.87%', '2': '41.70%', '3': '10.01%', '4': '1.42%'})	(1.97, {'2': '63.10%', '1': '23.13%', '3': '7.89%', '4': '5.88%'})	(1.85, {'2': '39.88%', '1': '39.30%', '3': '16.97%', '4': '3.85%'})	(1.95, {'2': '54.24%', '1': '27.45%', '3': '14.64%', '4': '3.66%'})	(2.35, {'2': '50.92%', '3': '27.68%', '1': '11.87%', '4': '9.53%'})	(1.84, {'2': '51.05%', '1': '34.28%', '3': '11.32%', '4': '3.35%'})	(2.28, {'2': '49.58%', '3': '31.50%', '1': '13.92%', '4': '5.00%'})	(2.22, {'2': '56.75%', '3': '21.09%', '1': '14.32%', '4': '7.85%'})	(2.21, {'2': '49.54%', '3': '22.74%', '1': '19.09%', '4': '8.63%'})								63	SOCIAL & CULTURAL IDENTITY
(3.1, {'3': '50.08%', '4': '30.45%', '2': '18.12%', '1': '1.34%'})	(3.01, {'4': '37.23%', '2': '32.29%', '3': '28.74%', '1': '1.74%'})	(3.08, {'4': '39.44%', '3': '36.03%', '2': '17.63%', '1': '6.90%'})	(2.97, {'3': '41.03%', '4': '29.11%', '2': '27.61%', '1': '2.25%'})	(3.11, {'3': '41.57%', '4': '35.81%', '2': '20.62%', '1': '2.00%'})	(3.09, {'3': '38.92%', '4': '36.06%', '2': '23.17%', '1': '1.85%'})	(2.97, {'3': '43.08%', '4': '28.83%', '2': '24.33%', '1': '3.75%'})	(3.0, {'3': '46.22%', '4': '28.57%', '2': '21.97%', '1': '3.24%'})	(2.96, {'3': '39.87%', '4': '29.40%', '2': '28.32%', '1': '2.41%'})								64	SOCIAL & CULTURAL IDENTITY
(2.54, {'2': '44.41%', '3': '35.25%', '4': '12.88%', '1': '7.46%'})	(2.41, {'2': '54.03%', '4': '18.22%', '3': '15.92%', '1': '11.82%'})	(2.69, {'3': '30.03%', '2': '28.27%', '4': '27.04%', '1': '14.66%'})	(2.58, {'2': '46.07%', '3': '29.23%', '4': '17.69%', '1': '7.01%'})	(2.71, {'2': '42.23%', '3': '31.15%', '4': '22.00%', '1': '4.62%'})	(3.1, {'4': '41.14%', '3': '30.03%', '2': '26.68%', '1': '2.15%'})	(2.91, {'3': '45.17%', '2': '28.33%', '4': '24.00%', '1': '2.50%'})	(2.84, {'3': '43.65%', '2': '30.95%', '4': '22.06%', '1': '3.34%'})	(2.94, {'3': '38.47%', '2': '29.84%', '4': '28.92%', '1': '2.77%'})								65	SOCIAL & CULTURAL IDENTITY
(3.15, {'3': '45.94%', '4': '35.16%', '2': '17.58%', '1': '1.33%'})	(2.99, {'4': '36.76%', '2': '31.04%', '3': '29.00%', '1': '3.20%'})	(3.03, {'4': '40.14%', '3': '30.99%', '2': '20.43%', '1': '8.44%'})	(2.71, {'2': '43.16%', '3': '30.51%', '4': '22.14%', '1': '4.19%'})	(2.89, {'2': '34.70%', '3': '32.27%', '4': '30.01%', '1': '3.02%'})	(2.99, {'4': '36.43%', '2': '30.55%', '3': '29.61%', '1': '3.41%'})	(2.91, {'3': '45.83%', '2': '27.92%', '4': '23.83%', '1': '2.42%'})	(2.87, {'3': '45.33%', '2': '29.25%', '4': '22.36%', '1': '3.06%'})	(2.94, {'3': '39.15%', '2': '29.05%', '4': '28.96%', '1': '2.84%'})								66	SOCIAL & CULTURAL IDENTITY
(2.03, {'2': '40.24%', '1': '32.57%', '3': '19.18%', '4': '8.01%'})	(1.95, {'2': '42.92%', '1': '35.55%', '3': '12.41%', '4': '9.12%'})	(2.29, {'1': '34.12%', '3': '27.35%', '2': '20.83%', '4': '17.70%'})	(2.06, {'2': '35.24%', '1': '34.05%', '3': '21.73%', '4': '8.98%'})	(2.54, {'3': '35.34%', '2': '31.07%', '4': '17.34%', '1': '16.25%'})	(1.59, {'1': '60.39%', '2': '22.72%', '3': '14.70%', '4': '2.20%'})	(2.11, {'2': '33.33%', '1': '32.00%', '3': '26.50%', '4': '8.17%'})	(2.13, {'2': '49.39%', '1': '22.11%', '3': '22.03%', '4': '6.47%'})	(2.46, {'3': '39.97%', '2': '33.00%', '1': '16.04%', '4': '11.00%'})								67	SOCIAL & CULTURAL IDENTITY
	(1.4, {'1': '70.91%', '2': '21.55%', '3': '3.97%', '4': '3.57%'})	(2.0, {'1': '42.20%', '2': '29.36%', '3': '14.43%', '4': '14.01%'})	(1.28, {'1': '79.05%', '2': '15.86%', '3': '3.42%', '4': '1.67%'})	(1.51, {'1': '60.30%', '2': '29.11%', '3': '9.51%', '4': '1.08%'})	(2.5, {'3': '29.43%', '1': '24.17%', '2': '24.09%', '4': '22.31%'})	(2.26, {'3': '33.50%', '2': '33.50%', '1': '24.50%', '4': '8.50%'})	(1.7, {'1': '47.11%', '2': '38.91%', '3': '10.42%', '4': '3.56%'})	(1.95, {'1': '38.27%', '2': '34.99%', '3': '20.44%', '4': '6.31%'})								68	SOCIAL & CULTURAL IDENTITY
(3.41, {'4': '50.47%', '3': '40.06%', '2': '9.01%', '1': '0.47%'})	(2.45, {'2': '43.68%', '4': '22.38%', '3': '17.07%', '1': '16.87%'})	(2.68, {'3': '34.17%', '4': '26.00%', '2': '21.22%', '1': '18.61%'})	(2.81, {'3': '39.43%', '4': '27.73%', '2': '19.15%', '1': '13.69%'})	(2.98, {'3': '58.01%', '4': '21.59%', '2': '17.03%', '1': '3.37%'})	(3.28, {'3': '45.35%', '4': '43.12%', '2': '7.57%', '1': '3.96%'})	(2.93, {'3': '55.92%', '4': '21.42%', '2': '16.67%', '1': '6.00%'})	(2.67, {'3': '38.55%', '2': '37.29%', '4': '17.45%', '1': '6.71%'})	(3.0, {'3': '46.95%', '4': '29.49%', '2': '17.29%', '1': '6.27%'})								69	SOCIAL & CULTURAL IDENTITY
(3.05, {'3': '43.84%', '4': '32.62%', '2': '19.95%', '1': '3.60%'})	(2.0, {'2': '48.73%', '1': '30.86%', '4': '10.58%', '3': '9.84%'})	(2.6, {'4': '27.50%', '3': '26.56%', '2': '24.08%', '1': '21.86%'})	(2.64, {'3': '29.10%', '4': '26.95%', '2': '25.41%', '1': '18.54%'})	(2.89, {'3': '54.03%', '2': '22.02%', '4': '19.50%', '1': '4.45%'})	(3.2, {'3': '53.08%', '4': '35.53%', '2': '7.59%', '1': '3.80%'})	(2.88, {'3': '51.58%', '4': '22.08%', '2': '18.17%', '1': '8.17%'})	(2.58, {'2': '43.41%', '3': '36.75%', '4': '13.86%', '1': '5.99%'})	(2.93, {'3': '50.21%', '4': '24.77%', '2': '18.66%', '1': '6.36%'})								70	SOCIAL & CULTURAL IDENTITY
(3.39, {'4': '56.13%', '3': '29.39%', '2': '12.26%', '1': '2.23%'})	(2.51, {'2': '42.16%', '3': '31.71%', '4': '15.11%', '1': '11.02%'})	(2.86, {'4': '35.59%', '3': '30.21%', '2': '19.18%', '1': '15.01%'})	(2.52, {'3': '32.44%', '2': '29.33%', '4': '19.38%', '1': '18.86%'})	(3.07, {'3': '51.66%', '4': '29.16%', '2': '16.28%', '1': '2.90%'})	(3.17, {'3': '47.18%', '4': '37.25%', '2': '10.89%', '1': '4.68%'})	(2.96, {'3': '54.33%', '4': '23.08%', '2': '18.08%', '1': '4.50%'})	(2.62, {'2': '41.24%', '3': '37.84%', '4': '14.92%', '1': '6.00%'})	(3.09, {'3': '39.45%', '4': '38.21%', '2': '15.16%', '1': '7.18%'})								71	SOCIAL & CULTURAL IDENTITY
	(1.72, {'1': '47.12%', '2': '38.02%', '3': '10.31%', '4': '4.55%'})	(2.35, {'2': '29.24%', '1': '28.18%', '3': '22.04%', '4': '20.54%'})	(1.36, {'1': '73.39%', '2': '19.75%', '3': '4.52%', '4': '2.34%'})	(2.34, {'2': '33.08%', '3': '32.83%', '1': '22.42%', '4': '11.67%'})	(2.4, {'3': '38.73%', '2': '31.44%', '1': '19.49%', '4': '10.34%'})	(2.5, {'3': '35.92%', '2': '27.67%', '1': '19.67%', '4': '16.75%'})	(1.82, {'2': '45.89%', '1': '38.38%', '3': '11.56%', '4': '4.17%'})	(2.54, {'3': '38.35%', '2': '32.72%', '4': '14.72%', '1': '14.21%'})								72	SOCIAL & CULTURAL IDENTITY
	(1.98, {'2': '42.14%', '1': '34.81%', '3': '12.90%', '4': '10.15%'})	(2.67, {'4': '29.60%', '3': '27.11%', '2': '23.84%', '1': '19.45%'})	(1.75, {'1': '51.50%', '2': '28.31%', '3': '13.43%', '4': '6.76%'})	(2.73, {'3': '49.20%', '2': '24.77%', '4': '16.46%', '1': '9.57%'})	(2.37, {'3': '36.11%', '2': '31.90%', '1': '21.07%', '4': '10.92%'})	(2.69, {'3': '43.33%', '2': '27.17%', '4': '18.42%', '1': '11.08%'})	(2.07, {'2': '49.16%', '1': '25.38%', '3': '18.30%', '4': '7.16%'})	(2.55, {'3': '37.16%', '2': '32.53%', '4': '16.01%', '1': '14.30%'})								73	SOCIAL & CULTURAL IDENTITY
	(2.58, {'2': '32.98%', '4': '29.62%', '1': '19.07%', '3': '18.33%'})	(3.27, {'4': '54.53%', '3': '25.54%', '2': '12.77%', '1': '7.16%'})	(2.81, {'4': '40.27%', '2': '25.81%', '3': '17.20%', '1': '16.72%'})	(3.09, {'3': '48.07%', '4': '31.93%', '2': '17.14%', '1': '2.86%'})	(2.92, {'3': '39.01%', '4': '31.33%', '2': '19.90%', '1': '9.77%'})	(3.02, {'3': '53.92%', '4': '25.08%', '2': '18.67%', '1': '2.33%'})	(2.14, {'2': '45.50%', '1': '24.41%', '3': '22.14%', '4': '7.95%'})	(3.4, {'4': '56.84%', '3': '31.08%', '2': '7.77%', '1': '4.31%'})								74	SOCIAL & CULTURAL IDENTITY
(3.7, {'4': '75.26%', '3': '21.55%', '1': '1.94%', '2': '1.25%'})	(2.7, {'2': '39.63%', '4': '31.59%', '3': '17.93%', '1': '10.85%'})	(3.55, {'4': '70.38%', '3': '18.99%', '2': '6.36%', '1': '4.27%'})	(3.58, {'4': '72.78%', '3': '16.59%', '2': '6.40%', '1': '4.23%'})	(3.24, {'3': '47.14%', '4': '39.75%', '2': '10.50%', '1': '2.61%'})	(3.68, {'4': '72.28%', '3': '24.47%', '2': '1.77%', '1': '1.49%'})	(3.1, {'3': '50.25%', '4': '31.08%', '2': '15.92%', '1': '2.75%'})	(2.5, {'2': '43.12%', '3': '38.16%', '4': '10.31%', '1': '8.40%'})	(3.56, {'4': '65.15%', '3': '27.76%', '2': '5.40%', '1': '1.69%'})								75	SOCIAL & CULTURAL IDENTITY
(3.46, {'4': '55.77%', '3': '34.92%', '2': '8.81%', '1': '0.51%'})	(2.35, {'2': '44.52%', '4': '20.69%', '1': '20.35%', '3': '14.43%'})	(3.52, {'4': '68.39%', '3': '19.53%', '2': '7.71%', '1': '4.38%'})	(3.57, {'4': '70.71%', '3': '18.67%', '2': '7.43%', '1': '3.19%'})	(3.18, {'3': '52.23%', '4': '33.98%', '2': '11.52%', '1': '2.27%'})	(3.48, {'4': '61.68%', '3': '28.50%', '2': '5.58%', '1': '4.25%'})	(3.04, {'3': '53.42%', '4': '26.50%', '2': '17.67%', '1': '2.42%'})	(2.37, {'2': '48.21%', '3': '29.05%', '1': '12.61%', '4': '10.14%'})	(3.51, {'4': '62.69%', '3': '28.51%', '2': '6.18%', '1': '2.62%'})								76	SOCIAL & CULTURAL IDENTITY
(3.09, {'3': '46.26%', '4': '32.54%', '2': '19.30%', '1': '1.89%'})	(2.2, {'2': '52.78%', '1': '19.22%', '3': '16.68%', '4': '11.32%'})	(2.92, {'4': '34.19%', '3': '32.60%', '2': '23.91%', '1': '9.30%'})	(2.74, {'3': '40.57%', '2': '31.80%', '4': '20.19%', '1': '7.44%'})	(3.23, {'3': '50.81%', '4': '36.73%', '2': '11.20%', '1': '1.27%'})	(2.77, {'3': '54.94%', '2': '23.71%', '4': '14.44%', '1': '6.91%'})	(2.78, {'3': '49.50%', '2': '28.42%', '4': '17.00%', '1': '5.08%'})	(2.32, {'2': '50.62%', '3': '29.74%', '1': '12.31%', '4': '7.33%'})	(3.03, {'3': '46.17%', '4': '30.24%', '2': '19.76%', '1': '3.83%'})								77	SOCIAL & CULTURAL IDENTITY
(2.96, {'3': '48.43%', '4': '25.30%', '2': '22.76%', '1': '3.51%'})	(2.01, {'2': '60.68%', '1': '22.23%', '3': '10.95%', '4': '6.15%'})	(2.83, {'4': '32.23%', '3': '30.88%', '2': '24.96%', '1': '11.94%'})	(2.85, {'3': '35.08%', '4': '28.73%', '2': '28.27%', '1': '7.92%'})	(2.71, {'3': '40.43%', '2': '30.34%', '4': '20.09%', '1': '9.15%'})	(2.63, {'3': '47.80%', '2': '30.97%', '4': '12.17%', '1': '9.06%'})	(2.62, {'3': '42.08%', '2': '31.67%', '4': '15.42%', '1': '10.83%'})	(2.18, {'2': '53.44%', '3': '23.88%', '1': '16.97%', '4': '5.71%'})	(2.52, {'3': '36.30%', '2': '35.27%', '4': '14.55%', '1': '13.87%'})								78	SOCIAL & CULTURAL IDENTITY
	(2.16, {'2': '45.45%', '1': '27.44%', '4': '16.80%', '3': '10.31%'})	(3.42, {'4': '62.97%', '3': '21.49%', '2': '10.30%', '1': '5.24%'})	(3.35, {'4': '60.24%', '3': '19.70%', '2': '15.00%', '1': '5.06%'})	(3.18, {'3': '48.39%', '4': '36.33%', '2': '12.56%', '1': '2.72%'})	(3.14, {'3': '40.97%', '4': '38.99%', '2': '14.62%', '1': '5.42%'})	(2.92, {'3': '54.25%', '4': '21.00%', '2': '20.92%', '1': '3.83%'})	(2.35, {'2': '46.45%', '3': '28.80%', '1': '14.49%', '4': '10.26%'})	(3.29, {'4': '47.98%', '3': '37.58%', '2': '10.23%', '1': '4.21%'})								79	SOCIAL & CULTURAL IDENTITY
(2.93, {'3': '37.60%', '2': '29.63%', '4': '29.24%', '1': '3.52%'})	(2.57, {'2': '43.64%', '3': '30.92%', '4': '17.10%', '1': '8.34%'})	(3.13, {'4': '47.09%', '3': '27.44%', '2': '17.01%', '1': '8.46%'})	(2.92, {'3': '34.95%', '4': '32.32%', '2': '25.43%', '1': '7.29%'})	(3.08, {'3': '43.56%', '4': '33.54%', '2': '20.66%', '1': '2.25%'})	(3.12, {'3': '45.28%', '4': '35.47%', '2': '14.62%', '1': '4.62%'})	(2.88, {'3': '51.42%', '2': '23.33%', '4': '20.75%', '1': '4.50%'})	(2.55, {'2': '43.66%', '3': '36.41%', '4': '12.85%', '1': '7.07%'})	(3.04, {'3': '48.36%', '4': '30.29%', '2': '16.21%', '1': '5.14%'})								80	SOCIAL & CULTURAL IDENTITY
(2.3, {'2': '48.21%', '3': '22.58%', '1': '16.94%', '4': '12.27%'})	(2.5, {'2': '40.86%', '4': '23.78%', '3': '18.96%', '1': '16.41%'})	(3.1, {'4': '46.43%', '3': '26.36%', '2': '17.89%', '1': '9.32%'})	(2.74, {'2': '29.52%', '3': '28.85%', '4': '28.85%', '1': '12.79%'})	(2.95, {'3': '43.99%', '4': '27.28%', '2': '24.98%', '1': '3.75%'})	(2.92, {'3': '44.09%', '4': '27.47%', '2': '21.33%', '1': '7.11%'})	(2.75, {'3': '45.25%', '2': '30.33%', '4': '17.92%', '1': '6.50%'})	(2.71, {'3': '35.78%', '2': '33.77%', '4': '21.76%', '1': '8.69%'})	(2.97, {'3': '47.47%', '4': '27.27%', '2': '20.02%', '1': '5.24%'})								81	SOCIAL & CULTURAL IDENTITY
(3.32, {'4': '48.02%', '3': '37.15%', '2': '13.95%', '1': '0.88%'})	(2.04, {'2': '50.07%', '1': '26.26%', '3': '17.10%', '4': '6.58%'})	(2.95, {'4': '41.41%', '3': '26.12%', '2': '18.80%', '1': '13.68%'})	(2.63, {'2': '32.76%', '3': '30.72%', '4': '22.87%', '1': '13.65%'})	(3.01, {'3': '48.37%', '4': '29.47%', '2': '15.89%', '1': '6.27%'})	(2.91, {'3': '44.97%', '4': '26.66%', '2': '20.59%', '1': '7.78%'})	(2.64, {'3': '39.17%', '2': '35.17%', '4': '16.67%', '1': '9.00%'})	(2.49, {'2': '47.22%', '3': '30.24%', '4': '13.74%', '1': '8.80%'})	(2.69, {'3': '39.28%', '4': '23.83%', '2': '19.44%', '1': '17.45%'})								82	SOCIAL & CULTURAL IDENTITY
(3.2, {'4': '45.17%', '3': '31.54%', '2': '21.39%', '1': '1.90%'})	(2.16, {'2': '57.25%', '1': '18.57%', '3': '13.83%', '4': '10.36%'})	(2.8, {'4': '35.67%', '3': '25.60%', '2': '22.27%', '1': '16.45%'})	(2.54, {'2': '35.94%', '3': '28.13%', '4': '20.53%', '1': '15.40%'})	(2.91, {'3': '45.16%', '4': '26.34%', '2': '21.24%', '1': '7.25%'})	(2.93, {'3': '40.26%', '4': '30.48%', '2': '20.78%', '1': '8.48%'})	(2.67, {'3': '45.50%', '2': '25.67%', '4': '16.83%', '1': '12.00%'})	(2.39, {'2': '48.05%', '3': '27.88%', '1': '12.32%', '4': '11.75%'})	(2.73, {'3': '40.53%', '2': '27.39%', '4': '21.67%', '1': '10.41%'})								83	SOCIAL & CULTURAL IDENTITY
(2.51, {'2': '44.36%', '3': '23.42%', '4': '19.87%', '1': '12.35%'})	(1.96, {'2': '52.52%', '1': '29.31%', '3': '11.00%', '4': '7.18%'})	(2.57, {'4': '29.27%', '1': '24.45%', '3': '23.18%', '2': '23.09%'})	(2.49, {'2': '35.99%', '3': '27.12%', '4': '19.44%', '1': '17.45%'})	(2.89, {'3': '47.15%', '4': '24.43%', '2': '21.87%', '1': '6.55%'})	(2.57, {'3': '34.75%', '2': '30.87%', '4': '18.77%', '1': '15.61%'})	(2.61, {'3': '40.25%', '2': '31.42%', '4': '16.42%', '1': '11.92%'})	(2.4, {'2': '47.98%', '3': '26.44%', '4': '13.09%', '1': '12.49%'})	(2.59, {'3': '40.24%', '2': '28.55%', '4': '16.67%', '1': '14.55%'})								84	SOCIAL & CULTURAL IDENTITY
(3.28, {'4': '46.25%', '3': '36.91%', '2': '15.62%', '1': '1.23%'})	(2.46, {'2': '56.01%', '4': '18.83%', '3': '16.96%', '1': '8.20%'})	(3.14, {'4': '50.74%', '3': '22.77%', '2': '15.80%', '1': '10.70%'})	(3.21, {'4': '51.35%', '3': '24.74%', '2': '17.12%', '1': '6.80%'})	(3.32, {'4': '47.72%', '3': '38.01%', '2': '12.64%', '1': '1.63%'})	(3.27, {'4': '48.52%', '3': '33.64%', '2': '13.77%', '1': '4.07%'})	(2.89, {'3': '49.33%', '4': '22.58%', '2': '22.42%', '1': '5.67%'})	(2.88, {'3': '40.54%', '2': '28.37%', '4': '26.23%', '1': '4.86%'})	(3.25, {'3': '43.64%', '4': '42.47%', '2': '10.57%', '1': '3.33%'})								85	SOCIAL & CULTURAL IDENTITY
(3.28, {'4': '46.25%', '3': '36.91%', '2': '15.62%', '1': '1.23%'})	(2.46, {'2': '56.01%', '4': '18.83%', '3': '16.96%', '1': '8.20%'})	(3.14, {'4': '50.74%', '3': '22.77%', '2': '15.80%', '1': '10.70%'})	(3.21, {'4': '51.35%', '3': '24.74%', '2': '17.12%', '1': '6.80%'})	(3.32, {'4': '47.72%', '3': '38.01%', '2': '12.64%', '1': '1.63%'})	(3.27, {'4': '48.52%', '3': '33.64%', '2': '13.77%', '1': '4.07%'})	(2.89, {'3': '49.33%', '4': '22.58%', '2': '22.42%', '1': '5.67%'})	(2.88, {'3': '40.54%', '2': '28.37%', '4': '26.23%', '1': '4.86%'})	(3.25, {'3': '43.64%', '4': '42.47%', '2': '10.57%', '1': '3.33%'})								86	SOCIAL & CULTURAL IDENTITY
(3.68, {'4': '72.00%', '3': '24.00%', '2': '3.53%', '1': '0.47%'})		(3.18, {'4': '52.92%', '3': '23.23%', '2': '13.10%', '1': '10.75%'})	(3.16, {'4': '47.40%', '3': '28.21%', '2': '17.66%', '1': '6.73%'})	(3.41, {'4': '51.53%', '3': '38.31%', '2': '9.53%', '1': '0.63%'})	(3.34, {'4': '53.08%', '3': '32.57%', '2': '9.66%', '1': '4.69%'})	(2.95, {'3': '55.25%', '4': '21.75%', '2': '19.50%', '1': '3.50%'})		(3.39, {'4': '50.43%', '3': '39.63%', '2': '8.32%', '1': '1.62%'})								87	SOCIAL & CULTURAL IDENTITY
(3.04, {'4': '37.85%', '3': '31.16%', '2': '28.17%', '1': '2.82%'})		(3.0, {'4': '45.11%', '3': '23.29%', '2': '17.81%', '1': '13.80%'})	(2.84, {'4': '32.36%', '2': '29.44%', '3': '28.93%', '1': '9.26%'})	(3.31, {'4': '46.46%', '3': '39.93%', '2': '12.00%', '1': '1.61%'})	(3.24, {'4': '44.92%', '3': '38.53%', '2': '11.94%', '1': '4.61%'})	(2.84, {'3': '51.67%', '2': '22.58%', '4': '19.50%', '1': '6.25%'})		(3.15, {'3': '47.09%', '4': '36.36%', '2': '12.16%', '1': '4.39%'})								88	SOCIAL & CULTURAL IDENTITY
(3.76, {'4': '80.44%', '3': '15.87%', '2': '2.58%', '1': '1.11%'})		(2.86, {'4': '41.51%', '3': '22.04%', '1': '19.25%', '2': '17.20%'})		(3.13, {'3': '41.00%', '4': '38.55%', '2': '15.64%', '1': '4.82%'})	(3.2, {'4': '45.16%', '3': '35.04%', '2': '14.60%', '1': '5.20%'})											89	SOCIAL & CULTURAL IDENTITY
(3.72, {'4': '75.81%', '3': '20.44%', '2': '3.24%', '1': '0.51%'})	(2.7, {'2': '35.40%', '4': '27.55%', '3': '26.10%', '1': '10.95%'})	(3.12, {'4': '49.71%', '3': '23.93%', '2': '14.53%', '1': '11.82%'})	(3.38, {'4': '62.47%', '3': '18.48%', '2': '13.39%', '1': '5.66%'})	(3.18, {'3': '42.07%', '4': '39.66%', '2': '15.26%', '1': '3.02%'})	(3.58, {'4': '69.24%', '3': '21.93%', '2': '6.10%', '1': '2.73%'})	(2.86, {'3': '50.33%', '2': '24.42%', '4': '20.25%', '1': '5.00%'})	(2.87, {'3': '41.30%', '2': '28.86%', '4': '25.14%', '1': '4.69%'})	(3.43, {'4': '54.03%', '3': '37.03%', '2': '7.17%', '1': '1.77%'})								90	SOCIAL & CULTURAL IDENTITY
(3.58, {'4': '65.98%', '3': '26.50%', '2': '6.95%', '1': '0.56%'})	(2.99, {'3': '45.96%', '4': '29.17%', '2': '19.45%', '1': '5.41%'})	(3.08, {'4': '47.59%', '3': '24.31%', '2': '16.21%', '1': '11.90%'})	(3.38, {'4': '62.34%', '3': '18.77%', '2': '13.60%', '1': '5.29%'})	(3.28, {'4': '45.87%', '3': '37.61%', '2': '15.17%', '1': '1.35%'})	(3.28, {'4': '49.91%', '3': '32.84%', '2': '12.78%', '1': '4.48%'})	(2.9, {'3': '51.83%', '2': '22.17%', '4': '21.50%', '1': '4.50%'})	(2.91, {'3': '45.32%', '2': '26.50%', '4': '24.77%', '1': '3.41%'})	(3.46, {'4': '57.20%', '3': '33.06%', '2': '7.81%', '1': '1.93%'})								91	SOCIAL & CULTURAL IDENTITY
(3.44, {'4': '62.47%', '3': '21.41%', '2': '13.85%', '1': '2.27%'})	(2.88, {'3': '43.70%', '4': '26.00%', '2': '22.17%', '1': '8.12%'})	(3.04, {'4': '44.98%', '3': '27.09%', '2': '14.89%', '1': '13.03%'})	(3.07, {'4': '47.61%', '3': '22.24%', '2': '19.78%', '1': '10.37%'})	(3.34, {'4': '48.29%', '3': '39.39%', '2': '10.61%', '1': '1.71%'})	(2.66, {'3': '30.74%', '2': '29.42%', '4': '24.91%', '1': '14.93%'})	(2.85, {'3': '50.08%', '2': '24.92%', '4': '20.08%', '1': '4.92%'})	(2.72, {'3': '38.85%', '2': '30.24%', '4': '21.45%', '1': '9.46%'})	(3.3, {'4': '47.56%', '3': '38.14%', '2': '10.91%', '1': '3.39%'})								92	SOCIAL & CULTURAL IDENTITY
(3.8, {'4': '83.88%', '3': '13.16%', '2': '1.97%', '1': '0.99%'})	(3.38, {'4': '53.81%', '3': '34.62%', '2': '7.71%', '1': '3.86%'})	(3.14, {'4': '50.61%', '3': '23.42%', '2': '14.87%', '1': '11.10%'})	(3.39, {'4': '61.72%', '3': '21.55%', '2': '11.21%', '1': '5.52%'})	(3.41, {'4': '52.38%', '3': '37.63%', '2': '8.87%', '1': '1.12%'})	(3.15, {'4': '43.94%', '3': '33.66%', '2': '15.71%', '1': '6.69%'})	(2.89, {'3': '51.58%', '2': '23.67%', '4': '20.67%', '1': '4.08%'})	(2.93, {'3': '45.67%', '4': '25.45%', '2': '25.17%', '1': '3.71%'})	(3.48, {'4': '58.78%', '3': '32.60%', '2': '6.19%', '1': '2.43%'})								93	SOCIAL & CULTURAL IDENTITY
(3.47, {'4': '60.78%', '3': '26.29%', '2': '12.07%', '1': '0.86%'})	(2.98, {'3': '47.45%', '4': '28.86%', '2': '16.38%', '1': '7.30%'})	(3.02, {'4': '46.00%', '3': '24.61%', '1': '14.75%', '2': '14.64%'})	(3.24, {'4': '55.05%', '3': '21.40%', '2': '16.29%', '1': '7.27%'})	(3.23, {'4': '44.30%', '3': '37.40%', '2': '15.78%', '1': '2.51%'})	(1.72, {'1': '56.58%', '2': '23.50%', '3': '11.47%', '4': '8.46%'})	(2.84, {'3': '50.08%', '2': '23.75%', '4': '20.08%', '1': '6.08%'})	(2.82, {'3': '40.63%', '2': '28.88%', '4': '23.88%', '1': '6.61%'})	(3.36, {'4': '51.31%', '3': '36.02%', '2': '9.66%', '1': '3.02%'})								94	SOCIAL & CULTURAL IDENTITY
(3.07, {'4': '42.63%', '2': '26.46%', '3': '26.26%', '1': '4.65%'})	(2.16, {'2': '45.71%', '3': '25.12%', '1': '22.40%', '4': '6.77%'})	(2.69, {'4': '33.37%', '3': '22.93%', '2': '22.93%', '1': '20.77%'})	(2.66, {'2': '32.60%', '4': '27.94%', '3': '24.97%', '1': '14.49%'})	(3.17, {'3': '43.21%', '4': '38.04%', '2': '16.67%', '1': '2.08%'})	(2.77, {'3': '83.79%', '2': '9.77%', '1': '6.45%'})	(2.77, {'3': '44.58%', '2': '23.92%', '4': '21.17%', '1': '10.33%'})	(2.52, {'2': '43.80%', '3': '29.41%', '4': '16.61%', '1': '10.18%'})	(2.9, {'3': '36.37%', '4': '32.48%', '2': '19.57%', '1': '11.58%'})								95	SOCIAL & CULTURAL IDENTITY
(3.42, {'4': '58.84%', '3': '26.12%', '2': '13.72%', '1': '1.32%'})	(2.98, {'3': '44.54%', '4': '28.79%', '2': '22.10%', '1': '4.58%'})	(2.89, {'4': '40.48%', '3': '24.66%', '2': '18.00%', '1': '16.86%'})	(3.05, {'4': '43.99%', '3': '25.98%', '2': '21.17%', '1': '8.86%'})	(3.32, {'4': '47.09%', '3': '39.15%', '2': '12.00%', '1': '1.75%'})	(2.46, {'3': '68.48%', '1': '22.17%', '2': '9.35%'})	(2.74, {'3': '47.08%', '2': '26.17%', '4': '17.92%', '1': '8.83%'})	(2.76, {'3': '39.78%', '2': '33.41%', '4': '21.10%', '1': '5.71%'})	(3.14, {'4': '41.25%', '3': '37.90%', '2': '14.36%', '1': '6.48%'})								96	SOCIAL & CULTURAL IDENTITY
(4.72, {'1': '22.31%', '10': '11.86%', '2': '10.75%', '5': '10.55%', '3': '9.75%', '7': '8.94%', '4': '8.74%', '8': '7.74%', '6': '5.43%', '9': '3.92%'})	(7.52, {'10': '35.78%', '8': '16.18%', '5': '15.01%', '7': '10.76%', '6': '8.29%', '9': '5.41%', '1': '5.14%', '4': '1.44%', '2': '1.03%', '3': '0.96%'})	(4.63, {'1': '23.33%', '5': '16.42%', '6': '11.00%', '2': '9.42%', '10': '8.17%', '8': '7.08%', '3': '6.92%', '4': '6.83%', '7': '5.75%', '9': '5.08%'})	(4.73, {'1': '26.05%', '5': '19.51%', '10': '13.68%', '6': '8.54%', '4': '6.62%', '3': '6.36%', '2': '5.84%', '7': '5.49%', '8': '5.23%', '9': '2.70%'})	(5.49, {'5': '21.48%', '4': '14.49%', '8': '13.06%', '6': '8.68%', '3': '8.42%', '10': '7.75%', '2': '7.16%', '7': '6.74%', '9': '6.32%', '1': '5.90%'})	(2.02, {'2': '93.73%', '3': '4.31%', '1': '1.97%'})	(5.9, {'5': '15.83%', '10': '15.83%', '1': '15.08%', '9': '11.33%', '8': '10.33%', '7': '10.00%', '3': '6.50%', '4': '6.25%', '6': '5.08%', '2': '3.75%'})	(6.85, {'8': '17.30%', '7': '15.64%', '6': '15.04%', '10': '14.61%', '5': '13.80%', '9': '10.27%', '4': '6.05%', '3': '2.98%', '1': '2.90%', '2': '1.41%'})	(5.35, {'5': '19.20%', '6': '15.66%', '7': '12.92%', '3': '10.00%', '1': '9.56%', '4': '7.79%', '10': '7.79%', '8': '7.17%', '2': '5.84%', '9': '4.07%'})								97	SOCIAL & CULTURAL IDENTITY
(0.02, {'0': '98.33%', '1': '0.92%', '2': '0.75%'})	(0.65, {'0': '55.98%', '1': '23.11%', '2': '20.91%'})	(0.29, {'0': '80.69%', '1': '9.91%', '2': '9.40%'})		(0.14, {'0': '89.92%', '1': '5.67%', '2': '4.42%'})	(0.9, {'0': '43.96%', '2': '34.32%', '1': '21.72%'})	(0.48, {'0': '67.08%', '1': '18.00%', '2': '14.92%'})	(0.08, {'0': '94.26%', '1': '3.48%', '2': '2.26%'})	(0.1, {'0': '92.09%', '1': '6.09%', '2': '1.83%'})								98	SOCIAL & CULTURAL IDENTITY
(0.08, {'0': '95.25%', '2': '2.75%', '1': '2.00%'})	(0.35, {'0': '75.52%', '1': '13.74%', '2': '10.74%'})	(0.32, {'0': '78.85%', '2': '11.08%', '1': '10.07%'})	(0.12, {'0': '92.56%', '2': '4.33%', '1': '3.11%'})	(0.09, {'0': '93.92%', '1': '3.58%', '2': '2.50%'})	(0.55, {'0': '64.92%', '2': '20.20%', '1': '14.88%'})	(0.57, {'0': '62.00%', '2': '19.33%', '1': '18.67%'})	(0.12, {'0': '90.95%', '1': '5.86%', '2': '3.18%'})	(0.14, {'0': '88.90%', '1': '7.72%', '2': '3.38%'})								99	SOCIAL & CULTURAL IDENTITY
(0.05, {'0': '97.00%', '2': '1.92%', '1': '1.08%'})	(0.28, {'0': '81.32%', '2': '9.47%', '1': '9.21%'})	(0.22, {'0': '85.31%', '2': '7.69%', '1': '7.00%'})	(0.08, {'0': '94.71%', '2': '3.21%', '1': '2.08%'})	(0.08, {'0': '94.42%', '1': '3.25%', '2': '2.33%'})	(0.6, {'0': '61.34%', '2': '20.98%', '1': '17.68%'})	(0.45, {'0': '69.58%', '1': '16.00%', '2': '14.42%'})	(0.1, {'0': '92.11%', '1': '5.67%', '2': '2.23%'})	(0.12, {'0': '91.18%', '1': '5.48%', '2': '3.34%'})								100	SOCIAL & CULTURAL IDENTITY
(0.04, {'0': '97.33%', '1': '1.50%', '2': '1.17%'})	(0.21, {'0': '86.69%', '2': '7.36%', '1': '5.95%'})	(0.15, {'0': '88.95%', '1': '7.03%', '2': '4.03%'})	(0.06, {'0': '95.93%', '2': '2.16%', '1': '1.90%'})	(0.06, {'0': '95.08%', '1': '3.58%', '2': '1.33%'})	(0.38, {'0': '73.54%', '1': '14.90%', '2': '11.56%'})	(0.3, {'0': '75.83%', '1': '18.33%', '2': '5.83%'})	(0.07, {'0': '94.03%', '1': '4.96%', '2': '1.01%'})	(0.09, {'0': '92.54%', '1': '5.66%', '2': '1.80%'})								101	SOCIAL & CULTURAL IDENTITY
(0.01, {'0': '99.33%', '1': '0.50%', '2': '0.17%'})	(0.16, {'0': '90.23%', '2': '6.69%', '1': '3.08%'})	(0.11, {'0': '90.97%', '1': '6.56%', '2': '2.47%'})	(0.02, {'0': '98.09%', '1': '1.56%', '2': '0.35%'})	(0.15, {'0': '90.42%', '2': '5.17%', '1': '4.42%'})	(0.22, {'0': '82.29%', '1': '13.24%', '2': '4.47%'})	(0.26, {'0': '77.17%', '1': '19.25%', '2': '3.58%'})	(0.11, {'0': '91.33%', '1': '6.40%', '2': '2.27%'})	(0.1, {'0': '92.18%', '1': '5.87%', '2': '1.96%'})								102	SOCIAL & CULTURAL IDENTITY
(0.01, {'0': '99.50%', '1': '0.33%', '2': '0.17%'})	(0.19, {'0': '87.24%', '2': '6.41%', '1': '6.35%'})	(0.14, {'0': '89.78%', '1': '6.44%', '2': '3.78%'})	(0.05, {'0': '96.47%', '1': '1.90%', '2': '1.64%'})	(0.06, {'0': '95.67%', '1': '2.75%', '2': '1.58%'})	(0.33, {'0': '76.58%', '1': '14.10%', '2': '9.32%'})	(0.26, {'0': '78.17%', '1': '17.67%', '2': '4.17%'})	(0.06, {'0': '94.85%', '1': '4.39%', '2': '0.76%'})	(0.07, {'0': '94.21%', '1': '4.86%', '2': '0.94%'})								103	SOCIAL & CULTURAL IDENTITY
(0.12, {'0': '91.66%', '1': '4.67%', '2': '3.67%'})	(0.17, {'0': '88.08%', '1': '6.56%', '2': '5.36%'})	(0.18, {'0': '87.53%', '1': '7.39%', '2': '5.07%'})	(0.13, {'0': '91.64%', '2': '4.57%', '1': '3.79%'})	(0.06, {'0': '95.00%', '1': '3.58%', '2': '1.42%'})	(0.52, {'0': '62.80%', '1': '22.27%', '2': '14.93%'})	(0.32, {'0': '74.83%', '1': '18.58%', '2': '6.58%'})	(0.08, {'0': '93.52%', '1': '4.70%', '2': '1.78%'})	(0.1, {'0': '92.04%', '1': '6.08%', '2': '1.88%'})								104	SOCIAL & CULTURAL IDENTITY
(0.07, {'0': '94.66%', '1': '3.50%', '2': '1.83%'})	(0.43, {'0': '69.18%', '1': '18.88%', '2': '11.94%'})	(0.43, {'0': '74.32%', '2': '16.84%', '1': '8.84%'})	(0.14, {'0': '91.75%', '2': '5.42%', '1': '2.84%'})	(0.09, {'0': '93.42%', '1': '3.75%', '2': '2.83%'})	(0.55, {'0': '65.96%', '2': '20.54%', '1': '13.50%'})	(0.36, {'0': '73.58%', '1': '16.58%', '2': '9.83%'})	(0.07, {'0': '93.76%', '1': '5.02%', '2': '1.22%'})	(0.13, {'0': '90.43%', '1': '6.18%', '2': '3.39%'})								105	SOCIAL & CULTURAL IDENTITY
(0.0, {'0': '99.67%', '1': '0.25%', '2': '0.08%'})	(0.12, {'0': '92.49%', '2': '4.29%', '1': '3.22%'})	(0.12, {'0': '90.81%', '1': '6.33%', '2': '2.86%'})	(0.04, {'0': '97.41%', '1': '1.64%', '2': '0.95%'})	(0.06, {'0': '95.67%', '1': '2.42%', '2': '1.92%'})	(0.3, {'0': '77.45%', '1': '15.57%', '2': '6.98%'})	(0.25, {'0': '78.75%', '1': '17.42%', '2': '3.83%'})	(0.04, {'0': '96.38%', '1': '3.03%', '2': '0.59%'})	(0.06, {'0': '95.32%', '1': '3.83%', '2': '0.85%'})								106	SOCIAL & CULTURAL IDENTITY
(0.01, {'0': '99.67%', '2': '0.25%', '1': '0.08%'})	(0.3, {'0': '78.34%', '1': '13.57%', '2': '8.09%'})	(0.26, {'0': '82.60%', '2': '8.79%', '1': '8.61%'})	(0.09, {'0': '94.39%', '2': '3.54%', '1': '2.07%'})	(0.06, {'0': '95.42%', '1': '2.67%', '2': '1.92%'})	(0.41, {'0': '71.91%', '1': '14.69%', '2': '13.40%'})	(0.27, {'0': '78.25%', '1': '16.33%', '2': '5.42%'})	(0.03, {'0': '96.79%', '1': '2.95%', '2': '0.25%'})	(0.06, {'0': '94.88%', '1': '4.09%', '2': '1.02%'})								107	SOCIAL & CULTURAL IDENTITY
(0.01, {'0': '99.42%', '1': '0.33%', '2': '0.25%'})	(0.13, {'0': '91.63%', '2': '5.02%', '1': '3.35%'})	(0.2, {'0': '86.45%', '1': '6.82%', '2': '6.73%'})	(0.06, {'0': '96.20%', '2': '1.99%', '1': '1.81%'})	(0.07, {'0': '94.83%', '1': '3.17%', '2': '2.00%'})	(0.33, {'0': '77.78%', '1': '11.88%', '2': '10.34%'})	(0.32, {'0': '75.83%', '1': '16.42%', '2': '7.75%'})	(0.05, {'0': '96.06%', '1': '3.09%', '2': '0.85%'})	(0.06, {'0': '94.63%', '1': '4.52%', '2': '0.85%'})								108	SOCIAL & CULTURAL IDENTITY
(6.74, {'10': '28.94%', '8': '12.84%', '3': '11.07%', '7': '10.15%', '5': '8.22%', '9': '7.97%', '1': '6.71%', '4': '5.45%', '6': '4.87%', '2': '3.78%'})	(6.85, {'10': '29.93%', '8': '15.64%', '5': '13.69%', '1': '13.22%', '7': '9.66%', '9': '6.71%', '6': '5.84%', '4': '2.01%', '2': '1.81%', '3': '1.48%'})	(4.72, {'1': '24.17%', '5': '11.17%', '2': '10.42%', '10': '10.25%', '3': '8.67%', '6': '7.67%', '9': '7.50%', '8': '7.42%', '7': '6.42%', '4': '6.33%'})	(7.96, {'10': '49.46%', '8': '11.41%', '7': '8.33%', '9': '8.16%', '1': '7.74%', '5': '5.75%', '6': '4.58%', '4': '1.83%', '3': '1.75%', '2': '1.00%'})	(5.9, {'8': '18.56%', '5': '15.13%', '4': '11.45%', '9': '9.36%', '7': '9.20%', '3': '8.53%', '6': '8.28%', '2': '7.94%', '10': '7.61%', '1': '3.93%'})	(6.73, {'10': '33.66%', '5': '12.67%', '2': '11.51%', '9': '8.41%', '8': '7.16%', '6': '6.58%', '3': '6.00%', '7': '5.22%', '4': '4.74%', '1': '4.06%'})	(6.44, {'10': '31.92%', '1': '15.33%', '6': '12.67%', '5': '8.75%', '9': '7.33%', '8': '6.25%', '3': '5.42%', '7': '5.00%', '4': '3.92%', '2': '3.42%'})	(5.21, {'6': '13.51%', '1': '13.25%', '5': '12.91%', '8': '11.98%', '7': '11.73%', '4': '10.03%', '3': '9.14%', '10': '6.82%', '2': '6.69%', '9': '3.94%'})	(6.37, {'10': '28.29%', '1': '13.39%', '7': '9.65%', '6': '8.90%', '9': '8.65%', '8': '8.15%', '2': '6.99%', '3': '6.16%', '4': '4.91%', '5': '4.91%'})								109	ECONOMIC DIMENSIONS
(6.4, {'10': '26.23%', '3': '10.70%', '8': '10.44%', '5': '10.00%', '7': '10.00%', '2': '8.33%', '9': '7.19%', '1': '6.40%', '6': '5.96%', '4': '4.74%'})	(6.09, {'10': '27.61%', '1': '18.79%', '5': '17.64%', '8': '9.77%', '7': '7.26%', '9': '5.02%', '4': '4.61%', '2': '3.19%', '3': '3.12%', '6': '2.99%'})	(4.55, {'1': '26.17%', '5': '11.58%', '6': '9.67%', '2': '9.58%', '3': '8.33%', '10': '7.83%', '8': '7.67%', '9': '7.00%', '4': '6.25%', '7': '5.92%'})	(5.53, {'5': '21.85%', '10': '20.48%', '1': '19.37%', '7': '6.94%', '6': '6.43%', '8': '6.34%', '3': '5.14%', '4': '4.80%', '2': '4.37%', '9': '4.28%'})	(5.42, {'5': '17.30%', '8': '14.02%', '4': '12.93%', '3': '12.93%', '7': '10.83%', '2': '10.24%', '6': '7.47%', '9': '6.88%', '10': '4.70%', '1': '2.69%'})	(7.17, {'10': '41.15%', '5': '11.73%', '2': '9.84%', '9': '8.15%', '6': '6.16%', '8': '5.96%', '3': '4.97%', '7': '4.97%', '4': '4.17%', '1': '2.88%'})	(5.57, {'10': '22.33%', '1': '21.58%', '6': '13.00%', '5': '11.75%', '8': '6.67%', '3': '6.08%', '7': '5.42%', '2': '5.00%', '9': '4.58%', '4': '3.58%'})	(6.1, {'6': '16.46%', '5': '15.77%', '7': '14.50%', '8': '14.20%', '10': '9.89%', '4': '9.06%', '3': '6.27%', '1': '5.92%', '9': '5.92%', '2': '2.00%'})	(6.68, {'10': '28.74%', '8': '10.34%', '7': '10.00%', '9': '9.66%', '1': '9.16%', '6': '7.48%', '5': '7.39%', '2': '6.47%', '3': '5.55%', '4': '5.21%'})								110	ECONOMIC DIMENSIONS
(2.54, {'1': '47.00%', '2': '15.50%', '3': '13.33%', '5': '9.75%', '4': '6.50%', '8': '2.00%', '6': '1.92%', '7': '1.67%', '10': '1.50%', '9': '0.83%'})	(4.13, {'1': '37.40%', '5': '21.05%', '10': '10.99%', '3': '5.16%', '8': '5.03%', '2': '4.83%', '7': '4.69%', '4': '4.69%', '6': '4.02%', '9': '2.14%'})	(7.89, {'10': '37.75%', '9': '16.42%', '8': '12.25%', '7': '8.58%', '6': '8.08%', '5': '7.42%', '1': '4.42%', '4': '2.17%', '3': '1.58%', '2': '1.33%'})	(2.96, {'1': '50.00%', '5': '18.11%', '2': '7.76%', '3': '6.43%', '6': '4.42%', '4': '4.42%', '10': '3.84%', '7': '2.59%', '8': '1.42%', '9': '1.00%'})	(4.77, {'5': '26.42%', '4': '19.25%', '3': '12.42%', '2': '10.50%', '8': '8.50%', '7': '6.58%', '6': '5.83%', '1': '4.67%', '10': '3.58%', '9': '2.25%'})	(4.51, {'1': '29.54%', '10': '14.81%', '5': '13.43%', '2': '13.24%', '6': '6.48%', '9': '5.19%', '4': '4.54%', '3': '4.35%', '8': '4.26%', '7': '4.17%'})	(4.81, {'1': '29.00%', '10': '16.08%', '5': '15.67%', '7': '7.67%', '8': '6.17%', '2': '6.08%', '3': '5.67%', '6': '5.58%', '4': '5.08%', '9': '3.00%'})	(4.9, {'1': '18.06%', '6': '14.72%', '7': '14.13%', '5': '12.69%', '4': '10.49%', '8': '10.24%', '3': '7.66%', '2': '5.29%', '9': '3.60%', '10': '3.13%'})	(3.49, {'1': '36.02%', '5': '14.14%', '2': '10.57%', '3': '10.07%', '4': '8.32%', '6': '7.32%', '7': '4.58%', '10': '3.91%', '8': '3.49%', '9': '1.58%'})								111	ECONOMIC DIMENSIONS
(2.59, {'1': '43.59%', '2': '17.75%', '3': '12.13%', '5': '10.19%', '4': '8.44%', '7': '2.55%', '6': '2.28%', '8': '1.32%', '10': '1.32%', '9': '0.44%'})	(3.53, {'1': '46.50%', '5': '17.77%', '10': '7.60%', '4': '5.25%', '2': '4.91%', '3': '4.91%', '8': '4.37%', '7': '3.43%', '6': '3.36%', '9': '1.88%'})	(7.14, {'10': '28.92%', '9': '14.50%', '8': '12.33%', '5': '10.08%', '6': '9.17%', '1': '7.75%', '7': '7.58%', '4': '3.50%', '2': '3.42%', '3': '2.75%'})	(2.57, {'1': '58.00%', '5': '10.10%', '2': '9.09%', '3': '7.24%', '4': '4.38%', '10': '3.70%', '6': '2.61%', '8': '1.94%', '7': '1.94%', '9': '1.01%'})	(4.51, {'5': '28.03%', '4': '19.61%', '3': '14.98%', '2': '12.12%', '6': '6.82%', '8': '6.73%', '7': '4.71%', '1': '3.62%', '9': '2.02%', '10': '1.35%'})	(3.62, {'1': '39.72%', '2': '18.96%', '10': '13.08%', '5': '7.96%', '3': '5.31%', '6': '3.79%', '4': '3.41%', '7': '3.32%', '9': '2.27%', '8': '2.18%'})	(3.6, {'1': '35.33%', '5': '17.67%', '4': '11.58%', '3': '8.58%', '6': '7.92%', '2': '7.25%', '10': '5.42%', '7': '3.08%', '9': '1.58%', '8': '1.58%'})	(4.65, {'1': '17.32%', '5': '15.51%', '6': '13.21%', '4': '12.83%', '7': '10.82%', '3': '10.31%', '8': '6.62%', '2': '6.37%', '10': '4.40%', '9': '2.60%'})	(2.93, {'1': '47.24%', '5': '10.79%', '2': '9.62%', '3': '9.36%', '4': '7.94%', '6': '5.43%', '7': '3.76%', '10': '3.01%', '8': '2.09%', '9': '0.75%'})								112	ECONOMIC DIMENSIONS
(3.88, {'1': '35.94%', '3': '13.30%', '2': '12.71%', '10': '11.78%', '5': '5.56%', '8': '5.47%', '7': '4.55%', '4': '4.38%', '9': '3.45%', '6': '2.86%'})	(3.88, {'1': '42.60%', '5': '15.34%', '10': '11.12%', '2': '6.23%', '8': '5.43%', '3': '4.82%', '4': '4.29%', '7': '4.29%', '6': '4.22%', '9': '1.67%'})	(6.81, {'10': '26.83%', '9': '14.42%', '8': '13.25%', '1': '13.25%', '7': '8.25%', '5': '7.92%', '6': '6.42%', '2': '3.75%', '3': '3.08%', '4': '2.83%'})	(3.35, {'1': '51.08%', '10': '11.06%', '5': '8.40%', '2': '8.07%', '3': '6.57%', '4': '4.58%', '6': '2.83%', '8': '2.75%', '9': '2.66%', '7': '2.00%'})	(4.99, {'5': '22.07%', '4': '18.31%', '3': '12.79%', '7': '10.12%', '2': '10.03%', '8': '8.78%', '6': '8.70%', '9': '4.43%', '1': '2.59%', '10': '2.17%'})	(5.26, {'2': '28.91%', '10': '22.70%', '3': '9.43%', '5': '8.06%', '1': '6.20%', '6': '5.71%', '4': '5.46%', '9': '5.33%', '8': '4.47%', '7': '3.72%'})	(4.22, {'1': '26.58%', '5': '18.58%', '2': '12.42%', '10': '8.92%', '6': '7.92%', '3': '6.83%', '4': '6.67%', '7': '4.92%', '8': '4.67%', '9': '2.50%'})	(5.22, {'5': '15.16%', '1': '13.53%', '6': '13.36%', '7': '12.73%', '4': '10.40%', '10': '9.19%', '3': '8.89%', '8': '7.60%', '2': '5.72%', '9': '3.42%'})	(3.55, {'1': '40.12%', '2': '11.54%', '3': '10.05%', '4': '7.48%', '10': '7.39%', '5': '6.48%', '8': '5.07%', '6': '4.49%', '7': '4.07%', '9': '3.32%'})								113	ECONOMIC DIMENSIONS
(1.63, {'2': '63.36%', '1': '36.64%'})	(1.31, {'1': '68.53%', '2': '31.47%'})	(1.55, {'2': '55.31%', '1': '44.69%'})	(1.49, {'1': '50.98%', '2': '49.02%'})	(1.62, {'2': '61.84%', '1': '38.16%'})	(1.49, {'1': '50.61%', '2': '49.39%'})	(1.45, {'1': '55.25%', '2': '44.75%'})	(1.42, {'1': '57.77%', '2': '42.23%'})	(1.63, {'2': '63.44%', '1': '36.56%'})								114	ECONOMIC DIMENSIONS
(8.52, {'10': '47.08%', '8': '15.21%', '7': '14.35%', '9': '10.74%', '6': '5.93%', '5': '3.61%', '4': '1.29%', '3': '0.86%', '1': '0.60%', '2': '0.34%'})	(6.77, {'10': '34.91%', '5': '15.76%', '8': '10.89%', '1': '10.08%', '6': '5.75%', '9': '4.94%', '7': '4.80%', '4': '4.67%', '3': '4.47%', '2': '3.72%'})	(8.78, {'10': '49.83%', '9': '22.17%', '8': '9.17%', '7': '6.67%', '6': '5.00%', '5': '4.50%', '3': '1.08%', '4': '0.92%', '1': '0.50%', '2': '0.17%'})	(8.2, {'10': '45.75%', '8': '12.96%', '9': '11.50%', '7': '9.36%', '5': '9.27%', '6': '4.12%', '4': '2.23%', '1': '2.15%', '3': '1.97%', '2': '0.69%'})	(7.83, {'10': '27.58%', '8': '20.17%', '9': '16.33%', '7': '11.58%', '6': '9.50%', '4': '6.17%', '5': '5.83%', '3': '1.83%', '2': '0.75%', '1': '0.25%'})	(9.12, {'10': '64.83%', '9': '12.15%', '8': '10.03%', '6': '4.25%', '7': '3.99%', '5': '3.14%', '4': '0.68%', '3': '0.34%', '1': '0.34%', '2': '0.25%'})	(7.7, {'10': '23.42%', '9': '18.83%', '8': '15.50%', '7': '15.25%', '6': '13.50%', '5': '7.17%', '4': '2.58%', '3': '2.00%', '2': '1.00%', '1': '0.75%'})	(6.57, {'6': '16.78%', '7': '16.70%', '5': '15.37%', '8': '13.91%', '10': '12.89%', '9': '8.13%', '4': '7.32%', '3': '4.45%', '2': '2.40%', '1': '2.05%'})	(8.16, {'10': '47.12%', '7': '13.01%', '8': '12.68%', '9': '8.84%', '6': '6.51%', '1': '3.92%', '5': '3.17%', '2': '1.75%', '3': '1.58%', '4': '1.42%'})								115	GOVERNANCE & POLITICAL SYSTEMS
	(2.56, {'3': '38.50%', '2': '38.29%', '4': '13.55%', '1': '9.66%'})	(3.18, {'4': '44.04%', '3': '36.29%', '2': '12.86%', '1': '6.81%'})	(2.99, {'3': '59.06%', '4': '21.35%', '2': '16.45%', '1': '3.13%'})	(3.26, {'3': '43.89%', '4': '41.46%', '2': '13.40%', '1': '1.26%'})	(2.91, {'3': '50.82%', '2': '23.86%', '4': '21.95%', '1': '3.37%'})	(2.46, {'3': '45.25%', '2': '39.92%', '1': '9.75%', '4': '5.08%'})	(2.21, {'3': '34.25%', '2': '29.44%', '1': '28.54%', '4': '7.78%'})	(3.04, {'3': '40.26%', '4': '33.02%', '2': '24.74%', '1': '1.98%'})								116	GOVERNANCE & POLITICAL SYSTEMS
	(2.63, {'3': '45.19%', '2': '38.04%', '4': '11.37%', '1': '5.40%'})	(2.84, {'3': '45.95%', '2': '25.79%', '4': '22.10%', '1': '6.16%'})	(2.8, {'3': '54.95%', '2': '25.54%', '4': '15.02%', '1': '4.49%'})	(2.97, {'3': '55.39%', '2': '21.80%', '4': '21.38%', '1': '1.43%'})	(2.83, {'3': '53.10%', '2': '27.10%', '4': '16.42%', '1': '3.38%'})	(2.55, {'3': '45.75%', '2': '43.17%', '4': '6.67%', '1': '4.42%'})	(2.16, {'1': '31.18%', '2': '30.23%', '3': '29.91%', '4': '8.67%'})	(2.93, {'3': '46.51%', '2': '26.92%', '4': '24.42%', '1': '2.16%'})								117	GOVERNANCE & POLITICAL SYSTEMS
	(2.6, {'3': '42.79%', '2': '39.29%', '4': '11.61%', '1': '6.32%'})	(2.9, {'3': '39.69%', '4': '29.21%', '2': '22.51%', '1': '8.59%'})	(2.75, {'3': '50.97%', '2': '27.68%', '4': '15.01%', '1': '6.34%'})	(2.9, {'3': '46.15%', '2': '29.16%', '4': '22.99%', '1': '1.69%'})	(2.76, {'3': '51.34%', '2': '32.07%', '4': '13.72%', '1': '2.87%'})	(2.54, {'3': '49.25%', '2': '40.00%', '1': '5.58%', '4': '5.17%'})	(2.19, {'2': '31.53%', '3': '31.03%', '1': '29.07%', '4': '8.38%'})	(2.7, {'3': '39.20%', '2': '38.41%', '4': '17.76%', '1': '4.64%'})								118	GOVERNANCE & POLITICAL SYSTEMS
	(2.51, {'2': '46.75%', '3': '38.33%', '4': '9.31%', '1': '5.61%'})	(2.75, {'3': '40.33%', '2': '28.73%', '4': '21.70%', '1': '9.23%'})	(2.53, {'3': '44.55%', '2': '38.91%', '1': '8.37%', '4': '8.17%'})	(2.85, {'3': '50.13%', '2': '30.06%', '4': '18.14%', '1': '1.68%'})	(2.24, {'2': '53.83%', '3': '28.51%', '1': '13.11%', '4': '4.55%'})	(2.34, {'2': '48.42%', '3': '36.08%', '1': '10.92%', '4': '4.58%'})	(2.1, {'2': '32.79%', '1': '31.93%', '3': '28.49%', '4': '6.79%'})	(2.52, {'2': '48.16%', '3': '31.03%', '4': '13.99%', '1': '6.82%'})								119	GOVERNANCE & POLITICAL SYSTEMS
	(2.14, {'2': '46.71%', '3': '23.67%', '1': '23.11%', '4': '6.51%'})	(2.33, {'2': '38.29%', '3': '26.27%', '1': '21.37%', '4': '14.07%'})	(2.45, {'2': '38.45%', '3': '36.10%', '1': '14.06%', '4': '11.40%'})	(2.6, {'3': '39.28%', '2': '36.88%', '4': '15.01%', '1': '8.83%'})	(2.63, {'3': '40.79%', '2': '39.38%', '4': '14.16%', '1': '5.67%'})	(2.4, {'2': '48.17%', '3': '37.08%', '1': '8.75%', '4': '6.00%'})	(2.22, {'3': '33.58%', '2': '30.93%', '1': '27.50%', '4': '7.99%'})	(2.69, {'2': '40.09%', '3': '33.36%', '4': '20.86%', '1': '5.69%'})								120	GOVERNANCE & POLITICAL SYSTEMS
	(2.36, {'2': '46.50%', '3': '26.95%', '1': '14.60%', '4': '11.95%'})	(2.34, {'3': '30.89%', '1': '28.93%', '2': '24.20%', '4': '15.98%'})	(1.66, {'1': '61.03%', '2': '17.62%', '3': '15.84%', '4': '5.52%'})	(2.4, {'2': '38.03%', '3': '27.50%', '1': '18.68%', '4': '15.79%'})	(1.9, {'1': '42.66%', '2': '29.99%', '3': '22.43%', '4': '4.93%'})	(2.56, {'3': '42.67%', '2': '39.33%', '4': '10.50%', '1': '7.50%'})	(1.47, {'1': '65.79%', '2': '23.14%', '3': '9.22%', '4': '1.84%'})	(2.27, {'3': '32.17%', '2': '28.33%', '1': '27.99%', '4': '11.51%'})								121	GOVERNANCE & POLITICAL SYSTEMS
(2.14, {'2': '51.58%', '1': '22.21%', '3': '16.64%', '4': '9.57%'})	(2.25, {'2': '48.81%', '3': '28.97%', '1': '16.03%', '4': '6.19%'})	(2.29, {'2': '30.58%', '1': '28.87%', '3': '23.55%', '4': '17.00%'})	(2.14, {'2': '34.13%', '1': '31.92%', '3': '21.86%', '4': '12.08%'})	(2.3, {'2': '40.85%', '3': '26.29%', '1': '20.69%', '4': '12.17%'})	(2.26, {'2': '41.56%', '3': '25.36%', '1': '21.79%', '4': '11.28%'})	(2.55, {'2': '40.48%', '3': '29.98%', '4': '18.04%', '1': '11.49%'})	(2.39, {'2': '42.02%', '3': '30.76%', '1': '15.55%', '4': '11.67%'})	(2.45, {'2': '34.43%', '3': '33.06%', '1': '17.58%', '4': '14.94%'})								122	GOVERNANCE & POLITICAL SYSTEMS
(8.07, {'10': '43.70%', '8': '14.82%', '9': '12.86%', '7': '9.97%', '5': '4.43%', '1': '4.09%', '3': '3.49%', '6': '2.81%', '4': '2.21%', '2': '1.62%'})	(5.76, {'5': '17.20%', '10': '17.07%', '1': '15.59%', '6': '11.16%', '8': '10.55%', '7': '10.22%', '2': '5.11%', '4': '4.70%', '9': '4.50%', '3': '3.90%'})	(8.1, {'10': '39.08%', '9': '18.00%', '8': '13.25%', '7': '8.08%', '6': '7.25%', '5': '6.58%', '1': '2.50%', '4': '2.08%', '2': '1.92%', '3': '1.25%'})	(8.48, {'10': '57.31%', '9': '10.84%', '8': '8.15%', '7': '6.05%', '5': '5.55%', '6': '3.78%', '1': '3.45%', '4': '2.18%', '3': '1.68%', '2': '1.01%'})	(6.98, {'8': '18.67%', '10': '18.42%', '7': '14.33%', '9': '12.25%', '5': '10.25%', '4': '8.83%', '6': '8.25%', '3': '3.00%', '2': '3.00%', '1': '3.00%'})	(5.33, {'2': '23.50%', '10': '18.31%', '6': '9.83%', '5': '9.38%', '3': '8.36%', '1': '7.12%', '7': '6.55%', '8': '5.76%', '9': '5.65%', '4': '5.54%'})	(6.9, {'10': '20.25%', '8': '14.17%', '7': '13.92%', '6': '12.42%', '9': '12.17%', '5': '8.58%', '4': '5.58%', '3': '5.17%', '2': '4.17%', '1': '3.58%'})	(7.21, {'10': '23.85%', '8': '15.49%', '7': '13.82%', '5': '12.50%', '9': '10.75%', '6': '10.32%', '4': '6.02%', '3': '4.10%', '1': '1.62%', '2': '1.54%'})	(6.49, {'10': '25.94%', '8': '12.13%', '1': '10.88%', '9': '9.71%', '7': '7.87%', '3': '7.70%', '5': '7.53%', '6': '7.11%', '4': '6.53%', '2': '4.60%'})								123	GOVERNANCE & POLITICAL SYSTEMS
(2.4, {'3': '32.64%', '2': '32.35%', '1': '21.35%', '4': '12.71%', '5': '0.95%'})	(2.8, {'3': '38.28%', '4': '20.26%', '1': '19.44%', '2': '14.97%', '5': '7.05%'})	(2.04, {'1': '36.87%', '2': '32.64%', '3': '21.07%', '4': '8.12%', '5': '1.30%'})	(1.96, {'1': '41.51%', '2': '33.28%', '3': '14.35%', '4': '9.00%', '5': '1.87%'})	(2.0, {'1': '37.30%', '2': '33.16%', '3': '22.11%', '4': '6.92%', '5': '0.51%'})	(2.32, {'1': '30.21%', '3': '28.84%', '2': '25.75%', '4': '12.62%', '5': '2.58%'})	(2.86, {'3': '40.42%', '4': '24.67%', '2': '23.92%', '1': '9.08%', '5': '1.92%'})	(2.18, {'2': '37.04%', '3': '27.46%', '1': '27.12%', '4': '7.19%', '5': '1.19%'})	(2.6, {'3': '43.99%', '2': '31.46%', '1': '11.61%', '4': '10.93%', '5': '2.02%'})								124	INDIVIDUAL WELLBEING & DEVELOPMENT
(0.65, {'0': '61.51%', '2': '26.35%', '1': '12.14%'})	(1.15, {'2': '56.62%', '0': '41.34%', '1': '2.04%'})	(0.65, {'0': '49.96%', '1': '35.07%', '2': '14.97%'})	(1.24, {'2': '56.02%', '0': '31.85%', '1': '12.13%'})	(1.08, {'2': '40.94%', '0': '32.99%', '1': '26.07%'})	(0.87, {'0': '47.83%', '2': '35.22%', '1': '16.96%'})	(1.02, {'2': '38.92%', '0': '36.67%', '1': '24.42%'})	(0.77, {'0': '47.15%', '1': '28.34%', '2': '24.50%'})	(0.97, {'1': '35.70%', '0': '33.56%', '2': '30.74%'})								125	INDIVIDUAL WELLBEING & DEVELOPMENT
(1.24, {'2': '55.89%', '0': '31.89%', '1': '12.22%'})	(1.06, {'2': '52.89%', '0': '46.77%', '1': '0.34%'})	(0.86, {'1': '45.07%', '0': '34.39%', '2': '20.54%'})	(1.32, {'2': '59.14%', '0': '26.74%', '1': '14.12%'})	(1.09, {'2': '41.46%', '0': '32.40%', '1': '26.14%'})	(1.0, {'2': '42.81%', '0': '42.72%', '1': '14.48%'})	(1.4, {'2': '61.83%', '0': '21.42%', '1': '16.75%'})	(0.91, {'0': '41.20%', '2': '31.94%', '1': '26.86%'})	(1.28, {'2': '49.19%', '1': '29.97%', '0': '20.84%'})								126	INDIVIDUAL WELLBEING & DEVELOPMENT
(1.15, {'2': '50.59%', '0': '35.17%', '1': '14.24%'})	(0.84, {'0': '56.64%', '2': '40.24%', '1': '3.12%'})	(0.95, {'1': '63.66%', '0': '20.49%', '2': '15.85%'})	(1.71, {'2': '82.47%', '0': '11.74%', '1': '5.79%'})	(1.37, {'2': '62.20%', '0': '24.91%', '1': '12.88%'})	(1.62, {'2': '75.26%', '0': '13.02%', '1': '11.72%'})	(0.98, {'0': '37.83%', '2': '36.00%', '1': '26.17%'})	(1.49, {'2': '63.36%', '1': '22.27%', '0': '14.37%'})	(1.12, {'2': '40.10%', '1': '32.08%', '0': '27.82%'})								127	INDIVIDUAL WELLBEING & DEVELOPMENT
(1.15, {'2': '47.11%', '0': '32.24%', '1': '20.66%'})	(1.02, {'2': '50.66%', '0': '48.50%', '1': '0.84%'})	(0.87, {'1': '45.15%', '0': '33.70%', '2': '21.14%'})	(1.55, {'2': '70.79%', '0': '16.11%', '1': '13.10%'})	(1.26, {'2': '52.39%', '0': '26.46%', '1': '21.15%'})	(1.16, {'2': '50.36%', '0': '34.44%', '1': '15.20%'})	(1.03, {'2': '36.25%', '0': '33.42%', '1': '30.33%'})	(1.3, {'2': '49.80%', '1': '30.61%', '0': '19.58%'})	(1.26, {'2': '50.17%', '1': '25.86%', '0': '23.97%'})								128	INDIVIDUAL WELLBEING & DEVELOPMENT
(1.33, {'2': '60.10%', '0': '26.93%', '1': '12.96%'})	(1.17, {'2': '58.23%', '0': '41.23%', '1': '0.55%'})	(0.99, {'1': '70.55%', '0': '15.46%', '2': '13.99%'})	(1.72, {'2': '83.30%', '0': '11.41%', '1': '5.28%'})	(1.42, {'2': '64.72%', '0': '22.92%', '1': '12.36%'})	(1.7, {'2': '79.84%', '0': '10.12%', '1': '10.03%'})	(1.07, {'2': '39.67%', '0': '32.92%', '1': '27.42%'})	(1.49, {'2': '62.90%', '1': '23.44%', '0': '13.66%'})	(1.19, {'2': '45.82%', '1': '27.65%', '0': '26.54%'})								129	INDIVIDUAL WELLBEING & DEVELOPMENT
(1.5, {'2': '68.67%', '0': '18.92%', '1': '12.41%'})	(1.28, {'2': '63.50%', '0': '35.96%', '1': '0.54%'})	(0.92, {'1': '56.57%', '0': '25.48%', '2': '17.95%'})	(1.63, {'2': '76.39%', '0': '13.09%', '1': '10.52%'})	(1.35, {'2': '58.46%', '0': '23.25%', '1': '18.29%'})	(1.44, {'2': '65.20%', '0': '21.27%', '1': '13.53%'})	(1.2, {'2': '47.25%', '0': '26.92%', '1': '25.83%'})	(1.24, {'2': '46.17%', '1': '31.85%', '0': '21.98%'})	(1.03, {'2': '36.09%', '0': '33.45%', '1': '30.47%'})								130	INDIVIDUAL WELLBEING & DEVELOPMENT
(1.53, {'2': '72.84%', '0': '20.19%', '1': '6.98%'})	(1.44, {'2': '71.52%', '0': '27.67%', '1': '0.81%'})	(0.96, {'1': '82.08%', '0': '10.85%', '2': '7.06%'})	(1.85, {'2': '91.33%', '0': '6.65%', '1': '2.02%'})	(1.54, {'2': '69.91%', '0': '16.40%', '1': '13.69%'})	(1.57, {'2': '73.34%', '0': '16.38%', '1': '10.28%'})	(1.37, {'2': '55.00%', '1': '27.33%', '0': '17.67%'})	(1.63, {'2': '72.49%', '1': '18.37%', '0': '9.14%'})	(1.43, {'2': '61.71%', '1': '19.31%', '0': '18.98%'})								131	INDIVIDUAL WELLBEING & DEVELOPMENT
(1.3, {'2': '59.00%', '0': '28.97%', '1': '12.03%'})	(0.79, {'0': '60.09%', '2': '39.43%', '1': '0.47%'})	(1.03, {'1': '73.50%', '2': '14.56%', '0': '11.94%'})	(1.8, {'2': '88.09%', '0': '8.14%', '1': '3.78%'})	(1.51, {'2': '68.21%', '0': '16.75%', '1': '15.03%'})	(1.33, {'2': '58.95%', '0': '25.65%', '1': '15.41%'})	(1.12, {'2': '43.25%', '0': '31.42%', '1': '25.33%'})	(1.53, {'2': '64.06%', '1': '24.52%', '0': '11.42%'})	(1.19, {'2': '44.11%', '1': '30.96%', '0': '24.94%'})								132	INDIVIDUAL WELLBEING & DEVELOPMENT
(2.68, {'3': '59.95%', '2': '21.25%', '1': '9.90%', '4': '8.90%'})	(2.7, {'2': '41.62%', '3': '37.98%', '4': '17.44%', '1': '2.96%'})	(2.87, {'3': '45.72%', '2': '24.09%', '4': '23.92%', '1': '6.28%'})	(2.9, {'3': '57.13%', '4': '19.52%', '2': '17.23%', '1': '6.11%'})	(2.91, {'3': '64.67%', '2': '17.58%', '4': '14.58%', '1': '3.17%'})	(2.81, {'3': '74.11%', '2': '17.29%', '4': '5.30%', '1': '3.30%'})	(2.28, {'2': '38.58%', '3': '37.83%', '1': '19.00%', '4': '4.58%'})	(2.89, {'3': '45.47%', '2': '25.16%', '4': '24.14%', '1': '5.24%'})	(2.43, {'2': '43.03%', '3': '37.21%', '1': '11.21%', '4': '8.55%'})								133	INDIVIDUAL WELLBEING & DEVELOPMENT
(1.54, {'1': '53.92%', '2': '39.67%', '3': '4.75%', '4': '1.67%'})	(1.84, {'2': '43.93%', '1': '39.39%', '3': '10.21%', '4': '6.48%'})	(1.57, {'1': '55.59%', '2': '34.72%', '3': '7.18%', '4': '2.50%'})	(1.31, {'1': '75.31%', '2': '19.93%', '3': '3.34%', '4': '1.42%'})	(1.87, {'2': '53.08%', '1': '30.75%', '3': '14.83%', '4': '1.33%'})	(1.51, {'1': '55.78%', '2': '37.86%', '3': '5.53%', '4': '0.84%'})	(1.99, {'2': '56.25%', '1': '23.50%', '3': '17.67%', '4': '2.58%'})	(2.18, {'2': '67.97%', '3': '20.55%', '1': '8.48%', '4': '3.00%'})	(1.58, {'1': '56.15%', '2': '31.98%', '3': '9.30%', '4': '2.57%'})								134	GOVERNANCE & POLITICAL SYSTEMS
(3.6, {'4': '71.09%', '3': '19.55%', '2': '7.85%', '1': '1.50%'})	(2.81, {'3': '55.90%', '2': '18.70%', '4': '16.82%', '1': '8.58%'})	(3.16, {'3': '43.13%', '4': '38.86%', '2': '13.65%', '1': '4.36%'})	(3.46, {'4': '65.75%', '3': '17.76%', '2': '12.81%', '1': '3.69%'})	(3.06, {'3': '40.08%', '4': '34.98%', '2': '20.84%', '1': '4.10%'})	(3.03, {'3': '35.76%', '4': '35.51%', '2': '24.54%', '1': '4.19%'})	(2.87, {'3': '42.92%', '2': '27.25%', '4': '24.67%', '1': '5.17%'})	(3.11, {'3': '40.29%', '4': '38.12%', '2': '15.86%', '1': '5.73%'})	(2.84, {'3': '35.27%', '4': '28.38%', '2': '28.22%', '1': '8.13%'})								135	GOVERNANCE & POLITICAL SYSTEMS
(3.41, {'4': '62.49%', '3': '20.91%', '2': '11.85%', '1': '4.74%'})	(3.52, {'4': '64.18%', '3': '26.26%', '2': '6.53%', '1': '3.03%'})	(3.09, {'3': '42.42%', '4': '37.12%', '2': '12.37%', '1': '8.08%'})	(3.25, {'4': '60.07%', '2': '16.02%', '3': '14.60%', '1': '9.31%'})	(3.04, {'4': '36.23%', '3': '35.90%', '2': '23.18%', '1': '4.69%'})	(2.92, {'4': '34.37%', '3': '31.26%', '2': '26.03%', '1': '8.34%'})	(2.75, {'3': '34.92%', '2': '33.58%', '4': '24.00%', '1': '7.50%'})	(3.12, {'4': '39.74%', '3': '37.86%', '2': '17.55%', '1': '4.85%'})	(2.48, {'2': '35.00%', '3': '30.58%', '4': '17.42%', '1': '17.00%'})								136	GOVERNANCE & POLITICAL SYSTEMS
	(3.33, {'3': '46.12%', '4': '44.37%', '2': '7.28%', '1': '2.23%'})	(3.46, {'4': '58.61%', '3': '31.91%', '2': '6.47%', '1': '3.02%'})	(3.75, {'4': '83.82%', '3': '8.26%', '2': '6.59%', '1': '1.33%'})	(3.25, {'4': '43.34%', '3': '38.14%', '2': '18.27%', '1': '0.25%'})	(3.25, {'4': '50.84%', '3': '27.11%', '2': '18.58%', '1': '3.46%'})	(3.16, {'4': '43.25%', '3': '32.58%', '2': '21.50%', '1': '2.67%'})	(3.38, {'4': '54.63%', '3': '32.29%', '2': '9.69%', '1': '3.40%'})	(2.96, {'4': '36.80%', '3': '29.76%', '2': '25.73%', '1': '7.71%'})								137	GOVERNANCE & POLITICAL SYSTEMS
(3.7, {'4': '79.43%', '3': '12.74%', '2': '6.02%', '1': '1.81%'})	(3.54, {'4': '63.40%', '3': '30.02%', '2': '4.10%', '1': '2.48%'})	(3.42, {'4': '57.46%', '3': '31.54%', '2': '6.73%', '1': '4.26%'})	(3.52, {'4': '72.72%', '3': '11.72%', '2': '10.63%', '1': '4.94%'})	(3.36, {'4': '52.18%', '3': '33.81%', '2': '12.25%', '1': '1.76%'})	(3.13, {'4': '49.24%', '3': '23.14%', '2': '18.56%', '1': '9.07%'})	(3.11, {'4': '38.83%', '3': '37.67%', '2': '19.08%', '1': '4.42%'})	(3.28, {'4': '50.00%', '3': '33.61%', '2': '11.06%', '1': '5.32%'})	(3.2, {'4': '48.41%', '3': '29.05%', '2': '16.36%', '1': '6.18%'})								138	GOVERNANCE & POLITICAL SYSTEMS
(3.03, {'4': '45.84%', '2': '23.05%', '3': '21.42%', '1': '9.68%'})	(2.94, {'4': '36.74%', '3': '33.04%', '2': '17.43%', '1': '12.79%'})	(3.71, {'4': '78.50%', '3': '14.68%', '2': '6.48%', '1': '0.34%'})	(3.39, {'4': '68.64%', '2': '12.86%', '3': '10.17%', '1': '8.34%'})	(3.48, {'4': '58.10%', '3': '32.22%', '2': '9.68%'})	(3.0, {'4': '43.31%', '3': '23.44%', '2': '23.19%', '1': '10.06%'})	(2.79, {'4': '31.67%', '3': '28.42%', '2': '27.50%', '1': '12.42%'})	(3.28, {'4': '50.32%', '3': '32.43%', '2': '12.39%', '1': '4.86%'})	(2.91, {'4': '36.06%', '3': '30.14%', '2': '22.47%', '1': '11.32%'})								139	GOVERNANCE & POLITICAL SYSTEMS
(2.61, {'2': '39.85%', '4': '25.06%', '3': '22.81%', '1': '12.28%'})	(3.14, {'3': '48.03%', '4': '35.60%', '2': '11.42%', '1': '4.94%'})	(2.92, {'3': '46.24%', '4': '27.34%', '2': '17.73%', '1': '8.70%'})	(2.9, {'4': '39.88%', '2': '26.64%', '3': '21.73%', '1': '11.74%'})	(2.8, {'3': '37.26%', '2': '29.57%', '4': '25.23%', '1': '7.94%'})	(2.58, {'2': '36.47%', '4': '24.62%', '3': '23.78%', '1': '15.13%'})	(2.35, {'2': '44.08%', '3': '26.92%', '1': '16.67%', '4': '12.33%'})	(3.1, {'3': '40.21%', '4': '37.48%', '2': '17.02%', '1': '5.28%'})	(2.55, {'2': '34.30%', '3': '32.89%', '4': '18.19%', '1': '14.62%'})								140	GOVERNANCE & POLITICAL SYSTEMS
	(3.48, {'4': '56.43%', '3': '35.76%', '2': '6.80%', '1': '1.01%'})	(3.24, {'4': '47.37%', '3': '35.74%', '2': '10.02%', '1': '6.88%'})	(3.7, {'4': '80.56%', '3': '10.95%', '2': '6.88%', '1': '1.61%'})	(3.37, {'4': '55.00%', '3': '30.43%', '2': '11.55%', '1': '3.02%'})	(3.45, {'4': '62.14%', '3': '24.98%', '2': '8.99%', '1': '3.89%'})	(2.4, {'2': '35.33%', '3': '30.58%', '1': '19.75%', '4': '14.33%'})	(3.35, {'4': '54.48%', '3': '31.04%', '2': '9.72%', '1': '4.76%'})	(3.06, {'4': '41.44%', '3': '30.12%', '2': '21.39%', '1': '7.05%'})								141	GOVERNANCE & POLITICAL SYSTEMS
(1.75, {'2': '74.94%', '1': '25.06%'})	(1.37, {'1': '63.45%', '2': '36.55%'})	(1.65, {'2': '64.59%', '1': '35.41%'})	(1.75, {'2': '74.58%', '1': '25.42%'})	(1.63, {'2': '62.75%', '1': '37.25%'})	(1.54, {'2': '54.49%', '1': '45.51%'})	(1.38, {'1': '62.08%', '2': '37.92%'})	(1.66, {'2': '66.33%', '1': '33.67%'})	(1.51, {'2': '51.01%', '1': '48.99%'})								142	GOVERNANCE & POLITICAL SYSTEMS
(1.8, {'2': '80.35%', '1': '19.65%'})	(1.61, {'2': '60.81%', '1': '39.19%'})	(1.57, {'2': '57.31%', '1': '42.69%'})	(1.79, {'2': '79.03%', '1': '20.97%'})	(1.7, {'2': '70.50%', '1': '29.50%'})	(1.52, {'2': '52.31%', '1': '47.69%'})	(1.46, {'1': '54.00%', '2': '46.00%'})	(1.7, {'2': '69.58%', '1': '30.42%'})	(1.62, {'2': '61.93%', '1': '38.07%'})								143	GOVERNANCE & POLITICAL SYSTEMS
	(1.96, {'2': '96.20%', '1': '3.80%'})	(1.87, {'2': '86.71%', '1': '13.29%'})	(1.95, {'2': '95.49%', '1': '4.51%'})	(1.91, {'2': '91.33%', '1': '8.67%'})	(1.88, {'2': '87.68%', '1': '12.32%'})	(1.9, {'2': '90.08%', '1': '9.92%'})	(1.79, {'2': '79.14%', '1': '20.86%'})	(1.96, {'2': '95.60%', '1': '4.40%'})								144	GOVERNANCE & POLITICAL SYSTEMS
(2.08, {'1': '44.59%', '2': '22.52%', '4': '19.44%', '3': '13.46%'})	(2.54, {'2': '32.05%', '4': '30.89%', '1': '22.57%', '3': '14.48%'})	(1.81, {'1': '51.78%', '2': '24.28%', '3': '14.74%', '4': '9.19%'})	(2.47, {'1': '34.17%', '4': '33.49%', '2': '18.06%', '3': '14.29%'})	(2.18, {'2': '33.83%', '1': '31.25%', '3': '20.50%', '4': '14.42%'})	(1.84, {'1': '57.36%', '3': '14.64%', '2': '14.55%', '4': '13.45%'})	(2.34, {'1': '30.67%', '2': '28.33%', '4': '23.75%', '3': '17.25%'})	(2.02, {'2': '39.39%', '1': '32.89%', '3': '20.85%', '4': '6.87%'})	(1.62, {'1': '62.99%', '3': '17.03%', '2': '15.86%', '4': '4.12%'})								145	GOVERNANCE & POLITICAL SYSTEMS
(1.72, {'1': '51.81%', '2': '30.90%', '3': '10.41%', '4': '6.88%'})	(2.63, {'2': '32.24%', '3': '29.53%', '4': '24.03%', '1': '14.21%'})	(1.81, {'1': '50.00%', '2': '26.41%', '3': '16.32%', '4': '7.26%'})	(2.03, {'1': '43.99%', '2': '27.33%', '4': '18.12%', '3': '10.56%'})	(2.13, {'1': '36.83%', '2': '29.08%', '3': '17.83%', '4': '16.25%'})	(1.59, {'1': '67.63%', '2': '13.86%', '3': '10.09%', '4': '8.42%'})	(2.36, {'2': '32.08%', '1': '27.83%', '4': '23.25%', '3': '16.83%'})	(1.89, {'2': '41.22%', '1': '37.22%', '3': '16.93%', '4': '4.63%'})	(1.49, {'1': '66.84%', '2': '18.33%', '3': '13.33%', '4': '1.49%'})								146	GOVERNANCE & POLITICAL SYSTEMS
(1.95, {'2': '94.74%', '1': '5.26%'})	(1.94, {'2': '94.19%', '1': '5.81%'})	(1.91, {'2': '90.80%', '1': '9.20%'})	(1.97, {'2': '96.81%', '1': '3.19%'})	(1.97, {'2': '96.58%', '1': '3.42%'})	(1.93, {'2': '93.36%', '1': '6.64%'})	(1.84, {'2': '83.50%', '1': '16.50%'})	(1.96, {'2': '96.36%', '1': '3.64%'})	(1.93, {'2': '93.40%', '1': '6.60%'})								147	GOVERNANCE & POLITICAL SYSTEMS
(1.95, {'2': '95.15%', '1': '4.85%'})	(1.88, {'2': '87.58%', '1': '12.42%'})	(1.9, {'2': '89.63%', '1': '10.37%'})	(1.97, {'2': '97.15%', '1': '2.85%'})	(1.94, {'2': '93.58%', '1': '6.42%'})	(1.92, {'2': '92.00%', '1': '8.00%'})	(1.78, {'2': '78.50%', '1': '21.50%'})	(1.96, {'2': '95.55%', '1': '4.45%'})	(1.93, {'2': '93.28%', '1': '6.72%'})								148	GOVERNANCE & POLITICAL SYSTEMS
	(2.87, {'3': '37.64%', '2': '29.46%', '4': '27.36%', '1': '5.54%'})	(1.62, {'1': '57.56%', '2': '27.07%', '3': '10.86%', '4': '4.51%'})	(1.89, {'1': '51.84%', '2': '22.74%', '4': '15.22%', '3': '10.20%'})	(2.1, {'1': '33.75%', '2': '32.25%', '3': '24.75%', '4': '9.25%'})	(1.58, {'1': '71.02%', '3': '10.28%', '4': '9.60%', '2': '9.10%'})	(2.2, {'1': '34.67%', '2': '28.67%', '3': '18.67%', '4': '18.00%'})	(1.77, {'2': '46.05%', '1': '39.54%', '3': '12.28%', '4': '2.13%'})	(1.45, {'1': '70.32%', '2': '15.13%', '3': '14.05%', '4': '0.50%'})								149	GOVERNANCE & POLITICAL SYSTEMS
	(2.74, {'2': '38.73%', '4': '27.80%', '3': '25.98%', '1': '7.49%'})	(1.6, {'1': '60.62%', '2': '24.00%', '3': '10.03%', '4': '5.35%'})	(1.82, {'1': '52.68%', '2': '25.08%', '4': '12.71%', '3': '9.53%'})	(2.07, {'1': '34.67%', '2': '32.67%', '3': '23.50%', '4': '9.17%'})	(1.53, {'1': '71.70%', '2': '10.83%', '3': '9.74%', '4': '7.72%'})	(2.28, {'1': '31.50%', '2': '25.75%', '3': '25.50%', '4': '17.25%'})	(1.73, {'2': '43.16%', '1': '42.99%', '3': '11.97%', '4': '1.88%'})	(1.45, {'1': '70.87%', '3': '14.36%', '2': '13.78%', '4': '1.00%'})								150	GOVERNANCE & POLITICAL SYSTEMS
	(3.35, {'4': '55.80%', '3': '26.15%', '2': '15.23%', '1': '2.83%'})	(1.76, {'1': '55.54%', '2': '21.31%', '3': '14.68%', '4': '8.47%'})	(2.14, {'1': '46.61%', '4': '24.94%', '2': '17.32%', '3': '11.13%'})	(2.16, {'1': '36.50%', '3': '25.00%', '2': '24.58%', '4': '13.92%'})	(1.47, {'1': '75.27%', '2': '9.25%', '3': '8.49%', '4': '6.98%'})	(2.61, {'4': '30.42%', '3': '24.00%', '1': '23.42%', '2': '22.17%'})	(1.9, {'2': '42.78%', '1': '35.79%', '3': '17.04%', '4': '4.40%'})	(1.51, {'1': '69.02%', '3': '15.61%', '2': '13.04%', '4': '2.33%'})								151	GOVERNANCE & POLITICAL SYSTEMS
(1.63, {'2': '63.43%', '1': '36.57%'})	(1.68, {'2': '68.21%', '1': '31.79%'})	(1.62, {'2': '62.09%', '1': '37.91%'})	(1.51, {'2': '51.02%', '1': '48.98%'})	(1.63, {'2': '62.98%', '1': '37.02%'})	(1.56, {'2': '56.19%', '1': '43.81%'})	(1.49, {'1': '50.80%', '2': '49.20%'})	(1.58, {'2': '57.65%', '1': '42.35%'})	(1.47, {'1': '52.57%', '2': '47.43%'})								152	GOVERNANCE & POLITICAL SYSTEMS
(1.87, {'2': '87.28%', '1': '12.72%'})	(1.85, {'2': '85.03%', '1': '14.97%'})	(1.9, {'2': '90.14%', '1': '9.86%'})	(1.9, {'2': '90.29%', '1': '9.71%'})	(1.74, {'2': '73.68%', '1': '26.32%'})	(1.91, {'2': '91.06%', '1': '8.94%'})	(1.75, {'2': '74.96%', '1': '25.04%'})	(1.6, {'2': '60.14%', '1': '39.86%'})	(1.82, {'2': '81.80%', '1': '18.20%'})								153	GOVERNANCE & POLITICAL SYSTEMS
(1.1, {'1': '89.59%', '2': '10.41%'})	(1.26, {'1': '73.77%', '2': '26.23%'})	(1.2, {'1': '80.19%', '2': '19.81%'})	(1.04, {'1': '95.52%', '2': '4.48%'})	(1.33, {'1': '66.67%', '2': '33.33%'})	(1.15, {'1': '84.50%', '2': '15.50%'})	(1.16, {'1': '84.00%', '2': '16.00%'})	(1.2, {'1': '79.93%', '2': '20.07%'})	(1.13, {'1': '86.51%', '2': '13.49%'})								154	GOVERNANCE & POLITICAL SYSTEMS
(1.0, {'1': '62.98%', '2': '28.96%', '3': '4.71%', '4': '3.34%'})	(1.0, {'1': '44.52%', '2': '35.49%', '3': '12.23%', '4': '7.75%'})	(1.0, {'1': '48.67%', '2': '41.83%', '3': '4.83%', '4': '4.67%'})	(2.0, {'2': '46.55%', '1': '41.65%', '3': '7.98%', '4': '3.82%'})	(1.0, {'1': '51.83%', '2': '26.08%', '3': '20.50%', '4': '1.58%'})	(1.0, {'1': '45.87%', '2': '37.61%', '3': '9.11%', '4': '7.42%'})	(1.0, {'1': '48.67%', '2': '33.50%', '3': '12.17%', '4': '5.67%'})	(1.0, {'1': '44.74%', '2': '38.96%', '3': '13.36%', '4': '2.93%'})	(1.0, {'1': '58.48%', '2': '34.00%', '3': '6.02%', '4': '1.50%'})								155	SOCIAL & CULTURAL IDENTITY
(2.0, {'2': '46.17%', '1': '28.63%', '3': '16.65%', '4': '8.55%'})	(1.0, {'1': '30.56%', '3': '26.86%', '2': '26.12%', '4': '16.45%'})	(2.0, {'2': '37.67%', '1': '27.67%', '3': '19.42%', '4': '15.25%'})	(1.0, {'1': '37.88%', '2': '35.84%', '3': '18.26%', '4': '8.02%'})	(3.0, {'3': '37.92%', '2': '28.67%', '1': '23.92%', '4': '9.50%'})	(1.0, {'1': '32.73%', '2': '28.36%', '3': '19.97%', '4': '18.94%'})	(2.0, {'2': '29.56%', '3': '27.97%', '1': '26.88%', '4': '15.58%'})	(3.0, {'3': '34.39%', '2': '34.18%', '1': '20.99%', '4': '10.43%'})	(2.0, {'2': '36.68%', '1': '27.41%', '3': '20.66%', '4': '15.25%'})								156	SOCIAL & CULTURAL IDENTITY
(3.0, {'3': '54.16%', '1': '38.46%', '2': '3.78%', '4': '3.61%'})	(3.0, {'3': '36.31%', '1': '27.79%', '2': '23.62%', '4': '12.28%'})	(1.0, {'1': '63.58%', '2': '18.33%', '3': '11.25%', '4': '6.83%'})	(1.0, {'1': '51.04%', '3': '24.69%', '2': '14.88%', '4': '9.39%'})	(1.0, {'1': '51.58%', '2': '33.25%', '3': '12.92%', '4': '2.25%'})	(1.0, {'1': '62.83%', '3': '19.60%', '2': '9.76%', '4': '7.82%'})	(1.0, {'1': '47.92%', '3': '29.67%', '2': '15.83%', '4': '6.58%'})	(1.0, {'1': '34.46%', '2': '33.29%', '3': '24.58%', '4': '7.66%'})	(3.0, {'3': '42.07%', '1': '39.23%', '2': '15.11%', '4': '3.59%'})								157	SOCIAL & CULTURAL IDENTITY
(1.0, {'1': '40.15%', '3': '38.70%', '4': '11.64%', '2': '9.50%'})	(3.0, {'3': '27.61%', '2': '26.87%', '1': '24.04%', '4': '21.48%'})	(3.0, {'3': '33.83%', '2': '30.50%', '4': '18.17%', '1': '17.50%'})	(3.0, {'3': '41.67%', '2': '20.37%', '1': '19.36%', '4': '18.60%'})	(3.0, {'3': '46.83%', '1': '22.17%', '2': '17.67%', '4': '13.33%'})	(3.0, {'3': '35.52%', '2': '24.11%', '4': '22.06%', '1': '18.31%'})	(3.0, {'3': '35.18%', '2': '23.26%', '1': '21.83%', '4': '19.73%'})	(3.0, {'3': '40.59%', '1': '22.08%', '2': '19.41%', '4': '17.92%'})	(3.0, {'3': '40.34%', '1': '25.27%', '2': '17.94%', '4': '16.45%'})								158	SOCIAL & CULTURAL IDENTITY
(1.0, {'1': '68.10%', '4': '17.34%', '2': '8.04%', '3': '6.51%'})	(1.0, {'1': '33.71%', '4': '25.45%', '2': '21.56%', '3': '19.27%'})	(1.0, {'1': '47.17%', '4': '22.00%', '2': '21.25%', '3': '9.58%'})	(1.0, {'1': '52.12%', '4': '22.86%', '2': '16.38%', '3': '8.65%'})	(1.0, {'1': '54.42%', '2': '21.83%', '3': '18.75%', '4': '5.00%'})	(1.0, {'1': '35.41%', '4': '28.34%', '2': '20.35%', '3': '15.90%'})	(1.0, {'1': '44.75%', '2': '24.00%', '4': '16.25%', '3': '15.00%'})	(1.0, {'1': '45.03%', '2': '31.95%', '3': '13.83%', '4': '9.19%'})	(1.0, {'1': '58.90%', '2': '17.29%', '4': '15.71%', '3': '8.10%'})								159	SOCIAL & CULTURAL IDENTITY
(4.0, {'4': '39.67%', '2': '24.63%', '1': '18.15%', '3': '17.55%'})	(4.0, {'4': '28.84%', '2': '25.63%', '1': '24.68%', '3': '20.85%'})	(2.0, {'2': '30.58%', '4': '27.67%', '1': '22.08%', '3': '19.67%'})	(4.0, {'4': '32.49%', '1': '23.49%', '2': '23.07%', '3': '20.95%'})	(3.0, {'3': '36.67%', '2': '24.83%', '4': '23.17%', '1': '15.33%'})	(4.0, {'4': '32.00%', '1': '25.36%', '2': '22.04%', '3': '20.60%'})	(4.0, {'4': '30.46%', '2': '26.78%', '3': '22.76%', '1': '20.00%'})	(2.0, {'2': '37.69%', '3': '25.76%', '4': '19.50%', '1': '17.05%'})	(4.0, {'4': '41.77%', '2': '22.53%', '1': '19.64%', '3': '16.05%'})								160	SOCIAL & CULTURAL IDENTITY
(7.77, {'10': '32.59%', '8': '16.21%', '7': '15.41%', '9': '11.58%', '5': '8.82%', '6': '7.75%', '1': '2.76%', '4': '2.40%', '3': '1.69%', '2': '0.80%'})	(8.01, {'10': '42.46%', '8': '17.82%', '5': '13.28%', '7': '9.81%', '9': '7.01%', '6': '4.14%', '1': '3.14%', '4': '1.07%', '3': '0.93%', '2': '0.33%'})	(8.13, {'10': '35.42%', '9': '19.75%', '8': '15.50%', '7': '9.17%', '6': '7.67%', '5': '6.75%', '1': '1.75%', '2': '1.50%', '4': '1.33%', '3': '1.17%'})	(7.89, {'10': '40.13%', '8': '14.55%', '9': '12.12%', '7': '8.78%', '5': '8.70%', '6': '6.19%', '1': '4.35%', '4': '2.01%', '3': '1.76%', '2': '1.42%'})	(7.56, {'7': '26.00%', '8': '23.58%', '9': '17.75%', '6': '12.58%', '10': '11.75%', '5': '4.25%', '4': '1.25%', '2': '1.17%', '3': '0.92%', '1': '0.75%'})	(9.04, {'10': '63.99%', '9': '12.26%', '8': '7.35%', '7': '6.34%', '6': '4.90%', '5': '3.21%', '2': '0.68%', '4': '0.51%', '1': '0.42%', '3': '0.34%'})	(8.25, {'10': '41.92%', '8': '15.58%', '9': '15.58%', '7': '8.33%', '6': '6.75%', '5': '4.33%', '3': '3.67%', '4': '1.58%', '1': '1.17%', '2': '1.08%'})	(7.33, {'10': '25.90%', '8': '14.58%', '7': '14.37%', '6': '12.11%', '5': '10.90%', '9': '10.36%', '4': '5.51%', '3': '3.59%', '1': '1.42%', '2': '1.25%'})	(7.47, {'10': '33.39%', '8': '14.19%', '7': '12.49%', '9': '9.94%', '5': '8.84%', '6': '7.56%', '1': '4.67%', '4': '4.16%', '3': '2.72%', '2': '2.04%'})								161	ECONOMIC DIMENSIONS
(7.55, {'10': '30.08%', '8': '15.49%', '7': '15.04%', '6': '10.47%', '5': '10.21%', '9': '9.49%', '3': '3.22%', '4': '2.95%', '1': '1.52%', '2': '1.52%'})	(7.98, {'10': '40.70%', '8': '18.87%', '5': '14.24%', '7': '9.00%', '9': '7.79%', '6': '4.23%', '1': '2.69%', '3': '1.01%', '4': '0.87%', '2': '0.60%'})	(7.96, {'10': '31.42%', '9': '18.50%', '8': '16.08%', '7': '11.58%', '6': '8.75%', '5': '7.00%', '4': '2.42%', '3': '1.75%', '1': '1.50%', '2': '1.00%'})	(7.6, {'10': '31.82%', '8': '16.08%', '9': '13.47%', '5': '10.10%', '7': '9.60%', '6': '8.00%', '1': '4.46%', '4': '3.54%', '3': '1.85%', '2': '1.09%'})	(6.94, {'7': '22.58%', '8': '20.92%', '9': '12.92%', '5': '10.50%', '6': '10.00%', '10': '9.67%', '3': '6.33%', '4': '5.33%', '2': '0.92%', '1': '0.83%'})	(8.95, {'10': '63.29%', '9': '12.18%', '8': '7.80%', '7': '4.97%', '6': '4.12%', '5': '3.95%', '4': '1.29%', '3': '1.11%', '2': '0.77%', '1': '0.51%'})	(7.67, {'10': '34.08%', '8': '17.17%', '9': '12.42%', '6': '8.75%', '5': '8.33%', '7': '7.33%', '3': '4.08%', '4': '3.42%', '1': '3.00%', '2': '1.42%'})	(7.44, {'10': '24.55%', '8': '14.51%', '9': '13.76%', '6': '13.38%', '7': '12.84%', '5': '11.79%', '4': '4.68%', '3': '2.72%', '2': '0.88%', '1': '0.88%'})	(6.83, {'10': '23.78%', '7': '14.37%', '8': '13.70%', '5': '11.85%', '6': '11.01%', '9': '7.39%', '1': '5.97%', '4': '5.38%', '2': '3.61%', '3': '2.94%'})								162	ECONOMIC DIMENSIONS
(4.75, {'5': '25.17%', '1': '15.17%', '3': '9.58%', '4': '9.25%', '6': '8.92%', '2': '8.75%', '10': '8.50%', '7': '7.50%', '8': '4.33%', '9': '2.83%'})	(5.87, {'5': '22.47%', '10': '18.76%', '1': '16.13%', '8': '11.00%', '7': '8.77%', '6': '6.75%', '9': '5.13%', '4': '4.52%', '3': '3.78%', '2': '2.70%'})	(5.35, {'5': '17.00%', '1': '15.83%', '6': '12.67%', '10': '9.92%', '8': '9.17%', '7': '8.25%', '9': '7.58%', '4': '6.83%', '3': '6.67%', '2': '6.08%'})	(5.23, {'1': '19.01%', '5': '18.00%', '10': '10.43%', '7': '10.09%', '6': '9.50%', '8': '9.25%', '4': '7.57%', '9': '5.72%', '2': '5.30%', '3': '5.13%'})	(5.93, {'5': '16.25%', '6': '15.17%', '7': '14.92%', '8': '14.92%', '4': '8.17%', '3': '7.58%', '9': '7.00%', '2': '6.67%', '10': '6.17%', '1': '3.17%'})	(5.64, {'10': '23.51%', '2': '17.44%', '5': '12.49%', '3': '10.46%', '6': '7.54%', '4': '6.86%', '7': '6.41%', '1': '6.41%', '9': '5.29%', '8': '3.60%'})	(6.09, {'7': '16.25%', '10': '13.58%', '5': '13.42%', '6': '12.75%', '8': '11.50%', '3': '7.42%', '1': '7.25%', '9': '6.58%', '4': '6.25%', '2': '5.00%'})	(5.52, {'5': '16.48%', '6': '14.72%', '7': '12.61%', '8': '10.50%', '4': '10.28%', '1': '9.68%', '3': '8.56%', '9': '6.76%', '10': '6.33%', '2': '4.09%'})	(4.8, {'5': '19.98%', '1': '18.73%', '6': '10.62%', '7': '9.95%', '4': '8.86%', '3': '8.03%', '8': '7.11%', '10': '6.86%', '2': '6.61%', '9': '3.26%'})								163	ECONOMIC DIMENSIONS
(5.41, {'5': '17.53%', '7': '13.92%', '6': '11.13%', '4': '11.13%', '1': '10.82%', '8': '10.31%', '3': '7.94%', '10': '7.53%', '2': '4.95%', '9': '4.74%'})	(4.35, {'1': '28.97%', '5': '25.41%', '6': '7.60%', '8': '7.33%', '3': '6.64%', '7': '6.37%', '4': '5.62%', '10': '5.48%', '2': '3.70%', '9': '2.88%'})	(5.76, {'5': '17.75%', '6': '15.17%', '1': '11.58%', '10': '11.33%', '7': '10.17%', '9': '8.92%', '8': '8.00%', '4': '7.75%', '3': '5.83%', '2': '3.50%'})	(5.89, {'5': '16.65%', '6': '13.46%', '7': '12.77%', '10': '12.68%', '1': '12.68%', '8': '11.30%', '9': '6.82%', '4': '6.21%', '3': '4.31%', '2': '3.11%'})	(5.05, {'7': '13.59%', '5': '13.16%', '3': '11.97%', '6': '11.79%', '4': '11.11%', '8': '10.77%', '2': '10.60%', '1': '8.80%', '9': '5.56%', '10': '2.65%'})	(6.65, {'10': '31.68%', '5': '12.77%', '6': '11.88%', '2': '9.70%', '8': '6.93%', '7': '6.63%', '9': '5.84%', '3': '4.95%', '4': '4.85%', '1': '4.75%'})	(5.37, {'5': '20.75%', '7': '12.00%', '6': '11.83%', '3': '10.25%', '8': '9.42%', '1': '9.25%', '4': '9.00%', '10': '8.67%', '2': '5.58%', '9': '3.25%'})	(5.54, {'5': '16.76%', '6': '15.73%', '7': '12.49%', '4': '10.60%', '8': '9.61%', '1': '9.39%', '3': '7.67%', '9': '6.76%', '10': '6.72%', '2': '4.27%'})	(5.5, {'5': '26.64%', '6': '11.19%', '10': '11.01%', '4': '9.95%', '7': '9.77%', '8': '7.99%', '1': '7.90%', '3': '6.75%', '2': '5.68%', '9': '3.11%'})								164	ECONOMIC DIMENSIONS
(3.91, {'1': '22.83%', '2': '14.79%', '3': '14.34%', '5': '10.87%', '4': '10.41%', '6': '7.95%', '7': '7.76%', '8': '4.93%', '10': '3.29%', '9': '2.83%'})	(3.97, {'1': '34.68%', '5': '17.78%', '2': '7.74%', '10': '7.41%', '4': '6.53%', '3': '6.53%', '7': '6.13%', '8': '6.06%', '6': '5.86%', '9': '1.28%'})	(4.47, {'1': '28.17%', '6': '11.00%', '3': '9.08%', '5': '9.00%', '2': '8.25%', '10': '7.75%', '9': '7.67%', '4': '7.25%', '8': '5.92%', '7': '5.92%'})	(4.41, {'1': '31.18%', '5': '11.43%', '10': '8.74%', '6': '7.90%', '8': '7.82%', '7': '7.65%', '3': '7.31%', '2': '7.23%', '4': '6.30%', '9': '4.45%'})	(6.02, {'7': '32.69%', '6': '26.96%', '5': '11.46%', '4': '9.27%', '8': '6.49%', '2': '3.12%', '9': '2.95%', '3': '2.78%', '10': '2.19%', '1': '2.11%'})	(4.55, {'2': '31.06%', '10': '14.31%', '3': '12.67%', '1': '9.95%', '7': '6.81%', '5': '6.54%', '6': '5.99%', '4': '4.77%', '8': '4.36%', '9': '3.54%'})	(3.68, {'1': '27.42%', '2': '16.42%', '5': '16.25%', '3': '10.83%', '6': '7.83%', '4': '7.08%', '7': '4.75%', '10': '4.08%', '8': '3.17%', '9': '2.17%'})	(4.96, {'5': '15.83%', '1': '13.93%', '6': '13.46%', '4': '11.13%', '7': '10.67%', '3': '9.82%', '8': '8.34%', '2': '6.94%', '9': '6.10%', '10': '3.77%'})	(4.16, {'1': '23.27%', '5': '17.03%', '3': '12.23%', '4': '11.05%', '6': '10.12%', '2': '8.18%', '7': '6.24%', '8': '5.06%', '10': '4.38%', '9': '2.45%'})								165	ECONOMIC DIMENSIONS
(5.81, {'5': '17.75%', '10': '13.08%', '7': '13.08%', '6': '11.67%', '1': '11.25%', '8': '10.67%', '3': '6.83%', '4': '6.00%', '9': '5.58%', '2': '4.08%'})	(7.14, {'10': '28.70%', '5': '18.62%', '8': '16.26%', '7': '10.55%', '9': '7.19%', '6': '6.72%', '1': '6.18%', '4': '2.82%', '3': '1.81%', '2': '1.14%'})	(7.41, {'10': '26.75%', '9': '16.42%', '8': '15.67%', '7': '10.42%', '5': '9.33%', '6': '8.75%', '1': '5.08%', '4': '2.83%', '2': '2.50%', '3': '2.25%'})	(6.23, {'10': '24.12%', '5': '14.86%', '1': '12.52%', '8': '10.43%', '7': '8.85%', '9': '7.26%', '3': '6.43%', '6': '5.68%', '4': '5.51%', '2': '4.34%'})	(7.04, {'7': '24.50%', '8': '23.16%', '6': '18.06%', '9': '10.12%', '10': '10.03%', '3': '6.27%', '5': '2.93%', '4': '2.68%', '2': '1.51%', '1': '0.75%'})	(7.98, {'10': '45.80%', '8': '11.11%', '9': '10.39%', '5': '8.76%', '7': '6.87%', '6': '6.87%', '2': '3.52%', '3': '2.53%', '4': '2.08%', '1': '2.08%'})	(7.46, {'10': '21.17%', '8': '19.58%', '9': '16.58%', '7': '13.25%', '6': '11.42%', '5': '7.50%', '4': '3.92%', '3': '2.67%', '2': '2.00%', '1': '1.92%'})	(6.87, {'8': '17.21%', '7': '16.37%', '6': '15.91%', '10': '14.86%', '5': '13.56%', '9': '9.24%', '4': '6.09%', '3': '3.86%', '1': '1.64%', '2': '1.26%'})	(5.65, {'1': '20.05%', '10': '17.54%', '5': '11.11%', '7': '10.36%', '6': '9.86%', '8': '8.77%', '9': '7.44%', '3': '5.93%', '4': '4.85%', '2': '4.09%'})								166	ECONOMIC DIMENSIONS
(9.96, {'10': '97.07%', '9': '2.34%', '7': '0.33%', '6': '0.08%', '5': '0.08%', '8': '0.08%'})	(9.34, {'10': '81.58%', '9': '5.21%', '8': '3.54%', '6': '2.14%', '5': '1.74%', '7': '1.67%', '1': '1.27%', '2': '1.20%', '4': '0.93%', '3': '0.73%'})		(9.51, {'10': '88.22%', '9': '2.42%', '8': '2.17%', '1': '1.67%', '6': '1.59%', '5': '1.17%', '4': '1.17%', '7': '0.84%', '3': '0.50%', '2': '0.25%'})	(9.21, {'10': '60.17%', '9': '16.25%', '8': '13.83%', '7': '5.83%', '6': '3.33%', '1': '0.25%', '3': '0.08%', '2': '0.08%', '4': '0.08%', '5': '0.08%'})	(9.88, {'10': '95.97%', '9': '1.60%', '7': '0.76%', '5': '0.50%', '8': '0.50%', '3': '0.17%', '4': '0.17%', '6': '0.17%', '1': '0.17%'})	(8.98, {'10': '72.17%', '9': '10.00%', '1': '5.42%', '8': '5.00%', '6': '2.58%', '7': '2.08%', '5': '1.58%', '2': '0.67%', '4': '0.33%', '3': '0.17%'})	(8.14, {'10': '45.04%', '8': '11.55%', '7': '10.13%', '6': '10.01%', '9': '9.01%', '5': '8.26%', '4': '2.71%', '3': '1.33%', '1': '1.08%', '2': '0.88%'})	(7.92, {'10': '66.86%', '1': '15.82%', '9': '4.25%', '8': '2.16%', '7': '2.16%', '6': '2.16%', '5': '2.08%', '4': '1.67%', '2': '1.50%', '3': '1.33%'})								167	SOCIAL & CULTURAL IDENTITY
	(1.01, {'1': '99.33%', '2': '0.67%'})		(1.0, {'1': '99.67%', '2': '0.33%'})	(1.0, {'1': '99.58%', '2': '0.42%'})	(1.0, {'1': '99.92%', '2': '0.08%'})	(1.01, {'1': '98.67%', '2': '1.33%'})	(1.05, {'1': '95.32%', '2': '4.68%'})	(1.0, {'1': '99.75%', '2': '0.25%'})								168	SOCIAL & CULTURAL IDENTITY
(1.08, {'1': '92.48%', '2': '7.52%'})	(1.08, {'1': '92.12%', '2': '7.88%'})		(1.07, {'1': '92.62%', '2': '7.38%'})	(1.14, {'1': '86.20%', '2': '13.80%'})	(1.03, {'1': '96.52%', '2': '3.48%'})	(1.04, {'1': '96.17%', '2': '3.83%'})	(1.06, {'1': '93.86%', '2': '6.14%'})	(1.08, {'1': '91.90%', '2': '8.10%'})								169	SOCIAL & CULTURAL IDENTITY
(1.0, {'1': '99.83%', '2': '0.17%'})	(1.11, {'1': '88.93%', '2': '11.07%'})		(1.03, {'1': '97.00%', '2': '3.00%'})	(1.14, {'1': '85.83%', '2': '14.17%'})	(1.02, {'1': '97.64%', '2': '2.36%'})	(1.02, {'1': '97.67%', '2': '2.33%'})	(1.08, {'1': '91.97%', '2': '8.03%'})	(1.02, {'1': '98.42%', '2': '1.58%'})								170	SOCIAL & CULTURAL IDENTITY
(1.0, {'1': '99.75%', '2': '0.25%'})	(1.07, {'1': '92.74%', '2': '7.26%'})		(1.01, {'1': '99.25%', '2': '0.75%'})	(1.1, {'1': '89.58%', '2': '10.42%'})	(1.0, {'1': '99.92%', '2': '0.08%'})	(1.02, {'1': '97.92%', '2': '2.08%'})	(1.07, {'1': '92.64%', '2': '7.36%'})	(1.01, {'1': '99.42%', '2': '0.58%'})								171	SOCIAL & CULTURAL IDENTITY
(1.19, {'1': '81.99%', '2': '17.25%', '3': '0.75%'})	(2.21, {'2': '40.02%', '3': '27.94%', '1': '23.83%', '4': '8.22%'})	(1.51, {'1': '66.35%', '2': '19.47%', '3': '10.67%', '4': '3.50%'})	(1.14, {'1': '89.41%', '2': '8.15%', '3': '1.60%', '4': '0.84%'})	(2.01, {'2': '36.21%', '1': '33.39%', '3': '26.81%', '4': '3.59%'})	(1.15, {'1': '87.56%', '2': '10.42%', '3': '1.68%', '4': '0.34%'})	(1.52, {'1': '62.08%', '2': '25.58%', '3': '10.17%', '4': '2.17%'})	(1.99, {'1': '36.36%', '2': '33.53%', '3': '24.61%', '4': '5.50%'})	(1.29, {'1': '75.92%', '2': '19.82%', '3': '3.68%', '4': '0.59%'})								172	SOCIAL & CULTURAL IDENTITY
	(2.09, {'2': '38.74%', '1': '30.60%', '3': '21.32%', '4': '9.35%'})	(1.71, {'1': '61.60%', '3': '15.27%', '2': '14.33%', '4': '8.79%'})	(1.22, {'1': '85.64%', '2': '8.43%', '3': '4.01%', '4': '1.92%'})	(2.42, {'3': '36.26%', '2': '28.34%', '1': '21.79%', '4': '13.62%'})	(1.17, {'1': '86.82%', '2': '9.40%', '3': '3.36%', '4': '0.42%'})	(1.52, {'1': '60.58%', '2': '29.83%', '3': '6.92%', '4': '2.67%'})	(1.77, {'1': '45.60%', '2': '35.06%', '3': '16.41%', '4': '2.94%'})	(1.6, {'1': '61.53%', '2': '19.40%', '3': '16.99%', '4': '2.08%'})								173	SOCIAL & CULTURAL IDENTITY
(2.94, {'1': '34.70%', '4': '24.33%', '2': '22.49%', '7': '13.04%', '6': '2.09%', '3': '1.76%', '5': '1.59%'})	(3.71, {'4': '33.73%', '3': '17.20%', '2': '16.53%', '7': '12.25%', '1': '9.64%', '5': '7.43%', '6': '3.21%'})	(4.13, {'7': '32.82%', '1': '19.90%', '2': '16.11%', '4': '11.89%', '3': '9.13%', '6': '5.43%', '5': '4.74%'})	(3.45, {'1': '39.07%', '7': '26.29%', '2': '13.69%', '4': '8.01%', '6': '5.43%', '3': '3.92%', '5': '3.59%'})	(3.7, {'2': '31.68%', '7': '20.70%', '4': '16.43%', '1': '11.57%', '3': '10.31%', '6': '6.87%', '5': '2.43%'})	(3.62, {'1': '41.96%', '7': '31.91%', '2': '11.49%', '6': '5.70%', '5': '4.85%', '4': '3.15%', '3': '0.94%'})	(3.1, {'1': '33.67%', '4': '18.33%', '2': '17.67%', '7': '10.75%', '6': '7.67%', '3': '6.75%', '5': '5.17%'})	(3.71, {'4': '32.27%', '2': '27.76%', '7': '13.74%', '1': '9.01%', '6': '5.99%', '5': '5.90%', '3': '5.32%'})	(4.05, {'7': '33.03%', '1': '29.83%', '2': '11.51%', '4': '11.34%', '6': '9.08%', '3': '2.61%', '5': '2.61%'})								174	SOCIAL & CULTURAL IDENTITY
(1.42, {'1': '79.97%', '3': '11.99%', '2': '5.20%', '4': '1.09%', '8': '0.75%', '5': '0.59%', '7': '0.25%', '6': '0.17%'})	(2.16, {'1': '63.79%', '2': '10.02%', '3': '7.21%', '4': '6.61%', '8': '5.41%', '5': '3.81%', '7': '2.47%', '6': '0.67%'})	(1.88, {'1': '76.68%', '8': '6.47%', '3': '5.02%', '2': '4.17%', '4': '4.17%', '5': '1.96%', '7': '0.77%', '6': '0.77%'})	(1.86, {'1': '79.25%', '8': '6.69%', '3': '4.94%', '2': '3.35%', '4': '1.84%', '6': '1.51%', '7': '1.42%', '5': '1.00%'})	(2.44, {'1': '47.18%', '2': '22.33%', '3': '12.30%', '8': '6.74%', '4': '3.54%', '7': '3.37%', '5': '3.29%', '6': '1.26%'})	(1.16, {'1': '94.79%', '3': '2.69%', '8': '0.92%', '2': '0.59%', '4': '0.50%', '5': '0.34%', '6': '0.17%'})	(2.06, {'1': '69.58%', '3': '8.08%', '4': '6.50%', '5': '4.83%', '8': '3.50%', '2': '3.25%', '7': '2.17%', '6': '2.08%'})	(2.63, {'1': '43.14%', '3': '18.38%', '2': '12.99%', '5': '11.47%', '4': '6.78%', '8': '4.47%', '6': '1.43%', '7': '1.35%'})	(2.4, {'1': '72.58%', '8': '13.04%', '4': '4.04%', '7': '2.78%', '3': '2.69%', '2': '2.10%', '5': '1.68%', '6': '1.09%'})								175	SOCIAL & CULTURAL IDENTITY
(1.26, {'1': '73.60%', '2': '26.31%', '3': '0.09%'})	(1.17, {'1': '84.20%', '2': '14.52%', '3': '1.28%'})	(1.28, {'1': '76.72%', '2': '18.47%', '3': '4.82%'})	(1.21, {'1': '79.66%', '2': '20.08%', '3': '0.25%'})	(1.44, {'1': '57.87%', '2': '40.02%', '3': '2.12%'})	(1.25, {'1': '75.65%', '2': '24.01%', '3': '0.34%'})	(1.36, {'1': '64.17%', '2': '35.83%'})	(1.29, {'1': '72.15%', '2': '26.81%', '3': '1.04%'})	(1.4, {'1': '62.21%', '2': '35.59%', '3': '2.20%'})								176	SOCIAL & CULTURAL IDENTITY
(1.49, {'1': '50.65%', '2': '49.35%'})	(1.81, {'2': '81.37%', '1': '18.63%'})	(1.77, {'2': '76.58%', '1': '23.42%'})	(1.68, {'2': '68.14%', '1': '31.86%'})	(1.67, {'2': '66.81%', '1': '33.19%'})	(1.54, {'2': '53.92%', '1': '46.08%'})	(1.55, {'2': '54.58%', '1': '45.42%'})	(1.45, {'1': '54.87%', '2': '45.13%'})	(1.46, {'1': '53.90%', '2': '46.10%'})								177	SOCIAL & CULTURAL IDENTITY
(1.44, {'1': '56.04%', '2': '43.96%'})	(1.51, {'2': '51.33%', '1': '48.67%'})	(1.72, {'2': '71.59%', '1': '28.41%'})	(1.55, {'2': '55.21%', '1': '44.79%'})	(1.55, {'2': '55.00%', '1': '45.00%'})	(1.62, {'2': '62.47%', '1': '37.53%'})	(1.56, {'2': '56.42%', '1': '43.58%'})	(1.36, {'1': '64.04%', '2': '35.96%'})	(1.6, {'2': '59.63%', '1': '40.37%'})								178	SOCIAL & CULTURAL IDENTITY
(4.57, {'1': '19.40%', '3': '12.72%', '5': '11.92%', '7': '11.39%', '4': '10.59%', '6': '9.79%', '2': '8.19%', '8': '7.03%', '10': '6.05%', '9': '2.94%'})	(5.92, {'5': '28.97%', '10': '14.38%', '8': '13.28%', '1': '12.32%', '7': '11.98%', '6': '8.12%', '4': '3.72%', '9': '2.89%', '3': '2.48%', '2': '1.86%'})	(6.95, {'6': '17.08%', '10': '15.75%', '8': '14.75%', '7': '14.08%', '9': '14.00%', '5': '13.42%', '1': '4.67%', '4': '2.92%', '3': '2.33%', '2': '1.00%'})	(4.68, {'1': '23.72%', '5': '17.69%', '6': '11.23%', '7': '8.80%', '3': '8.55%', '10': '7.71%', '4': '7.21%', '8': '6.62%', '2': '4.86%', '9': '3.60%'})	(6.07, {'5': '20.19%', '8': '16.98%', '7': '13.18%', '4': '12.16%', '6': '11.15%', '9': '7.43%', '3': '6.84%', '10': '6.50%', '2': '3.97%', '1': '1.60%'})	(6.05, {'10': '19.77%', '2': '14.56%', '6': '13.92%', '5': '12.43%', '7': '9.88%', '9': '7.76%', '8': '6.59%', '4': '5.42%', '1': '4.99%', '3': '4.68%'})	(4.72, {'5': '16.25%', '4': '13.58%', '8': '13.50%', '1': '13.00%', '3': '12.42%', '2': '10.17%', '6': '8.42%', '7': '5.67%', '10': '4.33%', '9': '2.67%'})	(5.7, {'5': '18.15%', '6': '15.60%', '7': '13.53%', '8': '12.19%', '4': '10.67%', '3': '7.95%', '10': '6.48%', '1': '6.48%', '9': '5.40%', '2': '3.54%'})	(3.09, {'1': '40.33%', '3': '13.39%', '5': '12.97%', '2': '10.04%', '4': '9.71%', '6': '4.35%', '10': '3.01%', '7': '2.68%', '8': '2.34%', '9': '1.17%'})								179	SOCIAL & CULTURAL IDENTITY
(1.79, {'1': '70.43%', '2': '9.54%', '3': '8.66%', '4': '4.02%', '5': '3.06%', '6': '1.40%', '7': '1.22%', '10': '0.70%', '8': '0.61%', '9': '0.35%'})	(3.6, {'1': '39.62%', '5': '18.24%', '2': '9.60%', '3': '8.51%', '10': '8.44%', '8': '4.42%', '4': '4.15%', '6': '3.27%', '7': '2.72%', '9': '1.02%'})	(3.56, {'1': '36.08%', '3': '11.33%', '2': '11.00%', '5': '9.83%', '6': '8.67%', '4': '7.00%', '7': '4.92%', '10': '4.17%', '8': '3.83%', '9': '3.17%'})	(2.99, {'1': '56.27%', '5': '8.39%', '10': '7.71%', '2': '7.12%', '3': '5.76%', '4': '4.07%', '6': '3.81%', '7': '3.05%', '8': '2.20%', '9': '1.61%'})	(3.4, {'1': '33.28%', '2': '16.38%', '3': '11.09%', '4': '10.07%', '5': '6.91%', '7': '6.91%', '8': '6.31%', '6': '5.12%', '9': '2.90%', '10': '1.02%'})	(2.62, {'1': '71.43%', '10': '10.02%', '2': '4.01%', '5': '3.66%', '4': '2.53%', '3': '2.18%', '9': '2.09%', '8': '1.57%', '7': '1.31%', '6': '1.22%'})	(3.68, {'1': '39.83%', '5': '11.25%', '2': '10.00%', '3': '8.00%', '6': '6.17%', '10': '5.58%', '8': '5.50%', '7': '4.83%', '4': '4.50%', '9': '4.33%'})	(1.89, {'1': '74.13%', '2': '5.55%', '3': '5.30%', '4': '4.21%', '5': '2.96%', '6': '2.67%', '7': '2.29%', '8': '1.88%', '9': '0.71%', '10': '0.29%'})	(2.76, {'1': '56.63%', '2': '10.18%', '3': '7.01%', '5': '5.42%', '10': '4.17%', '4': '4.09%', '8': '3.67%', '6': '3.42%', '7': '2.75%', '9': '2.67%'})								180	SOCIAL & CULTURAL IDENTITY
(1.59, {'1': '74.41%', '2': '10.19%', '3': '6.31%', '4': '3.79%', '5': '3.28%', '6': '1.09%', '7': '0.51%', '9': '0.17%', '10': '0.17%', '8': '0.08%'})	(2.71, {'1': '55.64%', '2': '8.99%', '5': '8.66%', '4': '8.19%', '3': '6.85%', '10': '5.37%', '8': '3.22%', '6': '1.48%', '9': '0.81%', '7': '0.81%'})	(2.99, {'1': '42.42%', '2': '15.58%', '3': '10.92%', '6': '7.67%', '5': '6.75%', '4': '5.92%', '7': '3.42%', '8': '3.00%', '9': '2.33%', '10': '2.00%'})			(1.61, {'1': '85.07%', '2': '4.28%', '5': '2.27%', '10': '2.10%', '3': '1.83%', '4': '1.14%', '6': '0.96%', '7': '0.87%', '9': '0.87%', '8': '0.61%'})	(3.13, {'1': '47.42%', '5': '12.33%', '2': '9.08%', '4': '6.50%', '3': '5.67%', '8': '5.42%', '6': '5.33%', '7': '4.08%', '9': '2.83%', '10': '1.33%'})	(2.1, {'1': '68.93%', '3': '6.78%', '2': '6.07%', '5': '4.56%', '4': '4.23%', '6': '3.43%', '7': '2.89%', '8': '1.42%', '10': '1.21%', '9': '0.46%'})	(2.12, {'1': '61.26%', '2': '11.39%', '3': '11.22%', '4': '4.74%', '5': '3.82%', '6': '2.66%', '8': '1.75%', '7': '1.66%', '10': '1.25%', '9': '0.25%'})								181	SOCIAL & CULTURAL IDENTITY
(1.07, {'1': '95.48%', '2': '3.35%', '3': '0.67%', '4': '0.33%', '7': '0.08%', '6': '0.08%'})	(1.46, {'1': '84.83%', '3': '4.21%', '2': '3.74%', '5': '3.28%', '4': '1.74%', '10': '0.74%', '7': '0.60%', '6': '0.47%', '8': '0.27%', '9': '0.13%'})	(2.42, {'1': '52.42%', '2': '15.92%', '3': '9.33%', '5': '6.17%', '6': '6.08%', '4': '4.75%', '7': '1.92%', '9': '1.58%', '8': '1.50%', '10': '0.33%'})	(1.38, {'1': '86.67%', '2': '5.17%', '3': '3.17%', '5': '1.17%', '4': '0.92%', '6': '0.92%', '8': '0.83%', '7': '0.67%', '10': '0.25%', '9': '0.25%'})	(1.97, {'1': '57.37%', '2': '18.28%', '3': '12.05%', '4': '5.39%', '5': '2.36%', '6': '1.35%', '8': '1.26%', '7': '1.18%', '10': '0.42%', '9': '0.34%'})	(1.16, {'1': '95.29%', '2': '1.88%', '3': '0.68%', '4': '0.43%', '9': '0.43%', '6': '0.34%', '10': '0.26%', '5': '0.26%', '8': '0.26%', '7': '0.17%'})	(2.52, {'1': '57.00%', '5': '12.17%', '2': '7.75%', '3': '7.08%', '4': '6.25%', '6': '3.67%', '7': '2.33%', '8': '1.42%', '10': '1.33%', '9': '1.00%'})	(1.61, {'1': '82.03%', '2': '4.53%', '3': '3.66%', '4': '2.04%', '5': '2.00%', '6': '1.96%', '7': '1.83%', '8': '1.41%', '9': '0.42%', '10': '0.12%'})	(1.53, {'1': '78.14%', '2': '10.31%', '3': '4.24%', '4': '2.16%', '5': '1.83%', '6': '1.50%', '7': '0.75%', '8': '0.58%', '10': '0.42%', '9': '0.08%'})								182	SOCIAL & CULTURAL IDENTITY
(1.54, {'1': '79.20%', '2': '6.79%', '3': '6.11%', '4': '3.06%', '5': '2.04%', '6': '1.19%', '7': '0.76%', '10': '0.42%', '8': '0.34%', '9': '0.08%'})	(2.33, {'1': '64.27%', '2': '8.39%', '3': '8.26%', '5': '7.19%', '10': '4.23%', '7': '2.01%', '8': '1.75%', '4': '1.75%', '6': '1.75%', '9': '0.40%'})	(2.74, {'1': '44.83%', '2': '15.58%', '3': '11.67%', '5': '8.58%', '6': '7.08%', '4': '5.42%', '7': '2.42%', '8': '2.25%', '9': '1.17%', '10': '1.00%'})	(2.11, {'1': '71.58%', '2': '6.79%', '3': '5.36%', '5': '4.95%', '10': '3.44%', '4': '2.35%', '7': '1.59%', '6': '1.51%', '8': '1.26%', '9': '1.17%'})	(2.56, {'1': '44.36%', '2': '20.13%', '3': '11.86%', '4': '7.35%', '6': '4.85%', '5': '4.68%', '7': '2.59%', '8': '2.34%', '9': '1.17%', '10': '0.67%'})	(1.49, {'1': '88.70%', '2': '2.76%', '10': '2.50%', '5': '1.98%', '4': '1.21%', '3': '1.21%', '6': '0.60%', '7': '0.52%', '9': '0.35%', '8': '0.17%'})	(2.83, {'1': '53.00%', '5': '11.67%', '2': '7.67%', '3': '6.08%', '7': '5.83%', '6': '5.58%', '4': '5.50%', '8': '1.83%', '10': '1.67%', '9': '1.17%'})	(1.69, {'1': '78.71%', '2': '5.97%', '3': '3.97%', '4': '3.30%', '6': '2.13%', '7': '2.09%', '5': '2.00%', '8': '1.21%', '9': '0.42%', '10': '0.21%'})	(1.92, {'1': '67.05%', '2': '12.48%', '3': '7.57%', '4': '3.24%', '5': '3.16%', '6': '2.00%', '7': '1.91%', '10': '1.08%', '8': '1.08%', '9': '0.42%'})								183	SOCIAL & CULTURAL IDENTITY
(1.18, {'1': '90.78%', '2': '4.11%', '3': '3.02%', '4': '1.42%', '5': '0.34%', '6': '0.17%', '7': '0.08%', '9': '0.08%'})	(1.5, {'1': '77.50%', '2': '12.55%', '3': '5.61%', '5': '1.27%', '10': '1.20%', '8': '0.67%', '4': '0.53%', '6': '0.40%', '7': '0.20%', '9': '0.07%'})	(2.65, {'1': '49.50%', '2': '14.92%', '3': '10.58%', '6': '6.83%', '5': '6.08%', '4': '4.25%', '8': '2.50%', '7': '2.17%', '10': '1.58%', '9': '1.58%'})	(1.44, {'1': '84.22%', '2': '5.93%', '3': '3.34%', '4': '2.25%', '5': '1.59%', '7': '0.67%', '9': '0.58%', '10': '0.50%', '6': '0.50%', '8': '0.42%'})	(2.64, {'1': '41.17%', '2': '18.50%', '3': '13.25%', '5': '12.00%', '4': '7.17%', '6': '3.17%', '7': '1.75%', '8': '1.33%', '10': '0.92%', '9': '0.75%'})	(1.24, {'1': '93.61%', '2': '2.50%', '3': '0.95%', '10': '0.95%', '9': '0.60%', '6': '0.60%', '5': '0.35%', '8': '0.17%', '4': '0.17%', '7': '0.09%'})	(2.79, {'1': '54.92%', '5': '13.67%', '2': '7.08%', '6': '5.42%', '4': '5.17%', '3': '4.75%', '7': '3.42%', '8': '2.17%', '10': '1.75%', '9': '1.67%'})	(1.65, {'1': '80.30%', '2': '5.38%', '3': '4.13%', '4': '2.67%', '7': '1.79%', '6': '1.75%', '5': '1.63%', '8': '1.59%', '9': '0.50%', '10': '0.25%'})	(1.74, {'1': '73.57%', '2': '10.47%', '3': '5.90%', '4': '2.74%', '5': '2.24%', '6': '1.50%', '10': '1.25%', '8': '1.16%', '7': '0.91%', '9': '0.25%'})								184	SOCIAL & CULTURAL IDENTITY
	(1.6, {'1': '83.02%', '2': '5.50%', '5': '3.62%', '3': '2.21%', '10': '2.01%', '4': '1.54%', '8': '0.60%', '6': '0.60%', '7': '0.60%', '9': '0.27%'})	(2.3, {'1': '56.77%', '2': '15.81%', '3': '7.66%', '6': '6.59%', '5': '4.55%', '4': '3.47%', '7': '2.16%', '9': '1.08%', '10': '0.96%', '8': '0.96%'})	(1.27, {'1': '90.13%', '2': '3.77%', '3': '2.09%', '5': '1.17%', '4': '0.92%', '6': '0.84%', '7': '0.50%', '8': '0.33%', '10': '0.17%', '9': '0.08%'})	(2.34, {'1': '48.49%', '2': '21.64%', '3': '9.56%', '5': '6.46%', '4': '5.70%', '6': '3.10%', '7': '2.35%', '8': '1.34%', '9': '0.92%', '10': '0.42%'})	(1.12, {'1': '96.51%', '2': '1.43%', '3': '0.63%', '10': '0.54%', '4': '0.36%', '5': '0.27%', '9': '0.18%', '8': '0.09%'})	(2.77, {'1': '51.58%', '5': '13.33%', '2': '11.25%', '4': '5.75%', '3': '5.17%', '6': '4.67%', '9': '2.42%', '7': '2.17%', '8': '1.92%', '10': '1.75%'})	(2.08, {'1': '69.74%', '4': '6.05%', '5': '6.01%', '2': '5.04%', '3': '5.04%', '6': '2.84%', '7': '2.41%', '8': '1.69%', '9': '0.76%', '10': '0.42%'})	(1.41, {'1': '81.57%', '2': '8.92%', '3': '4.17%', '4': '2.09%', '5': '1.25%', '6': '0.92%', '10': '0.33%', '7': '0.33%', '8': '0.25%', '9': '0.17%'})								185	SOCIAL & CULTURAL IDENTITY
					(1.13, {'1': '95.76%', '2': '1.89%', '3': '0.63%', '10': '0.63%', '4': '0.63%', '5': '0.18%', '9': '0.18%', '6': '0.09%'})	(2.78, {'1': '50.83%', '2': '13.00%', '5': '12.42%', '3': '5.75%', '4': '4.58%', '6': '4.17%', '8': '2.67%', '10': '2.25%', '9': '2.25%', '7': '2.08%'})	(1.85, {'1': '73.96%', '2': '5.96%', '3': '5.17%', '4': '4.20%', '5': '4.03%', '6': '2.48%', '7': '2.44%', '8': '1.01%', '9': '0.59%', '10': '0.17%'})	(1.67, {'1': '76.81%', '2': '9.14%', '3': '5.15%', '4': '2.33%', '6': '1.83%', '10': '1.41%', '5': '1.25%', '8': '0.91%', '7': '0.91%', '9': '0.25%'})								186	SOCIAL & CULTURAL IDENTITY
(2.06, {'1': '68.27%', '3': '9.20%', '5': '7.43%', '4': '6.08%', '6': '4.05%', '2': '2.28%', '7': '1.86%', '8': '0.68%', '9': '0.08%', '10': '0.08%'})	(2.73, {'1': '58.70%', '5': '10.84%', '2': '7.56%', '3': '4.82%', '10': '4.15%', '4': '3.48%', '7': '3.35%', '6': '3.21%', '8': '2.61%', '9': '1.27%'})	(2.78, {'1': '43.17%', '2': '16.17%', '3': '10.08%', '5': '9.75%', '4': '7.33%', '6': '6.75%', '7': '3.08%', '8': '1.58%', '9': '1.25%', '10': '0.83%'})	(1.91, {'1': '69.31%', '2': '9.28%', '5': '6.61%', '3': '6.35%', '4': '3.43%', '6': '1.59%', '7': '1.25%', '8': '1.00%', '10': '0.84%', '9': '0.33%'})	(2.36, {'1': '48.17%', '2': '19.83%', '3': '13.25%', '4': '5.42%', '5': '4.83%', '6': '2.83%', '7': '2.08%', '8': '1.75%', '9': '1.17%', '10': '0.67%'})	(1.58, {'1': '87.39%', '10': '2.75%', '2': '2.40%', '5': '2.13%', '3': '1.78%', '4': '1.15%', '7': '0.80%', '8': '0.53%', '6': '0.53%', '9': '0.53%'})	(3.62, {'1': '36.25%', '5': '12.83%', '2': '11.50%', '6': '7.58%', '4': '7.42%', '3': '7.17%', '7': '6.25%', '8': '4.50%', '10': '3.67%', '9': '2.83%'})	(2.57, {'1': '55.92%', '5': '10.27%', '4': '8.33%', '3': '8.07%', '2': '6.17%', '6': '4.65%', '7': '3.09%', '8': '1.90%', '10': '0.97%', '9': '0.63%'})	(2.67, {'1': '55.45%', '5': '8.91%', '2': '8.33%', '4': '7.33%', '3': '6.66%', '6': '4.08%', '7': '3.16%', '8': '2.66%', '10': '2.16%', '9': '1.25%'})								187	SOCIAL & CULTURAL IDENTITY
(4.98, {'1': '20.24%', '5': '19.40%', '6': '13.60%', '7': '12.68%', '4': '9.40%', '10': '7.72%', '8': '7.64%', '3': '5.71%', '2': '2.10%', '9': '1.51%'})	(3.65, {'1': '41.42%', '5': '25.20%', '7': '6.43%', '6': '6.03%', '4': '5.56%', '10': '4.49%', '3': '3.82%', '8': '3.28%', '2': '3.15%', '9': '0.60%'})	(3.77, {'1': '26.08%', '5': '19.00%', '3': '12.17%', '2': '11.42%', '6': '10.25%', '4': '9.00%', '7': '4.58%', '8': '2.75%', '10': '2.42%', '9': '2.33%'})	(3.81, {'1': '34.84%', '5': '22.39%', '4': '8.35%', '6': '6.43%', '3': '6.43%', '2': '5.76%', '7': '5.01%', '8': '4.68%', '10': '3.84%', '9': '2.26%'})	(3.94, {'1': '24.46%', '2': '14.99%', '3': '12.65%', '5': '11.14%', '7': '8.63%', '6': '8.21%', '4': '7.71%', '8': '6.28%', '9': '3.77%', '10': '2.18%'})	(3.68, {'1': '46.07%', '5': '18.04%', '10': '9.81%', '6': '6.98%', '3': '4.60%', '4': '3.98%', '7': '3.45%', '2': '3.36%', '8': '2.03%', '9': '1.68%'})	(5.71, {'1': '16.92%', '10': '13.42%', '8': '13.00%', '7': '12.25%', '6': '11.42%', '5': '11.17%', '4': '7.42%', '9': '6.25%', '2': '4.50%', '3': '3.67%'})	(4.4, {'1': '29.78%', '5': '16.84%', '6': '13.62%', '7': '11.16%', '4': '6.79%', '8': '6.28%', '3': '5.47%', '10': '4.07%', '2': '3.14%', '9': '2.84%'})	(4.14, {'1': '34.63%', '5': '13.70%', '7': '9.39%', '2': '8.55%', '6': '8.22%', '8': '6.98%', '10': '5.65%', '4': '4.90%', '3': '4.15%', '9': '3.82%'})								188	SOCIAL & CULTURAL IDENTITY
	(2.24, {'1': '71.93%', '5': '10.16%', '6': '3.48%', '7': '3.07%', '10': '2.81%', '3': '2.67%', '4': '2.54%', '2': '2.34%', '8': '0.60%', '9': '0.40%'})		(1.25, {'1': '90.12%', '2': '4.36%', '3': '2.01%', '5': '1.09%', '4': '0.92%', '7': '0.59%', '6': '0.42%', '10': '0.34%', '8': '0.08%', '9': '0.08%'})	(2.28, {'1': '49.71%', '2': '21.92%', '3': '11.05%', '4': '5.19%', '5': '4.35%', '8': '2.43%', '7': '2.18%', '6': '1.51%', '9': '1.34%', '10': '0.33%'})	(1.12, {'1': '96.30%', '2': '1.67%', '5': '0.70%', '3': '0.44%', '10': '0.44%', '4': '0.18%', '6': '0.09%', '9': '0.09%', '8': '0.09%'})	(3.14, {'1': '41.42%', '5': '14.50%', '2': '11.83%', '4': '9.67%', '3': '6.92%', '6': '5.67%', '7': '3.08%', '8': '3.00%', '10': '2.42%', '9': '1.50%'})	(2.35, {'1': '62.37%', '5': '7.67%', '3': '6.91%', '2': '6.65%', '4': '5.47%', '6': '4.49%', '7': '2.97%', '8': '1.65%', '10': '1.02%', '9': '0.81%'})	(1.54, {'1': '78.77%', '2': '10.99%', '3': '3.50%', '4': '1.83%', '7': '1.25%', '6': '1.25%', '10': '0.92%', '5': '0.75%', '8': '0.75%'})								189	SOCIAL & CULTURAL IDENTITY
(1.12, {'1': '95.73%', '2': '2.26%', '5': '0.50%', '3': '0.42%', '10': '0.33%', '4': '0.33%', '7': '0.33%', '6': '0.08%'})	(1.49, {'1': '82.84%', '2': '6.81%', '5': '4.07%', '3': '2.27%', '4': '2.20%', '10': '1.07%', '6': '0.27%', '9': '0.20%', '8': '0.20%', '7': '0.07%'})	(2.28, {'1': '56.17%', '2': '15.17%', '3': '7.58%', '5': '5.67%', '6': '5.50%', '4': '5.42%', '7': '1.75%', '8': '1.58%', '9': '0.83%', '10': '0.33%'})	(1.24, {'1': '91.33%', '2': '3.25%', '3': '2.17%', '5': '1.08%', '4': '1.00%', '10': '0.33%', '8': '0.25%', '9': '0.25%', '7': '0.17%', '6': '0.17%'})	(2.09, {'1': '58.08%', '2': '18.92%', '3': '9.17%', '4': '4.42%', '5': '3.00%', '10': '1.58%', '9': '1.58%', '7': '1.42%', '8': '1.00%', '6': '0.83%'})	(1.15, {'1': '95.17%', '2': '2.19%', '5': '0.79%', '3': '0.70%', '10': '0.61%', '4': '0.26%', '9': '0.18%', '8': '0.09%'})	(2.94, {'1': '46.25%', '5': '16.58%', '2': '13.25%', '6': '6.08%', '4': '5.08%', '3': '4.67%', '8': '2.75%', '7': '2.25%', '10': '2.08%', '9': '1.00%'})	(1.8, {'1': '75.16%', '3': '6.06%', '2': '5.44%', '4': '3.89%', '5': '3.30%', '6': '2.26%', '7': '2.01%', '8': '0.92%', '9': '0.84%', '10': '0.13%'})	(1.44, {'1': '81.40%', '2': '8.97%', '3': '4.32%', '4': '2.24%', '5': '0.91%', '10': '0.75%', '7': '0.58%', '6': '0.42%', '9': '0.33%', '8': '0.08%'})								190	SOCIAL & CULTURAL IDENTITY
(1.57, {'1': '82.78%', '2': '3.83%', '3': '3.73%', '5': '3.63%', '4': '1.91%', '6': '1.71%', '7': '1.11%', '10': '0.60%', '8': '0.50%', '9': '0.20%'})	(3.07, {'1': '58.85%', '5': '14.44%', '10': '8.20%', '2': '3.93%', '8': '3.53%', '3': '3.05%', '6': '2.92%', '4': '2.03%', '7': '1.97%', '9': '1.08%'})	(2.4, {'1': '52.92%', '2': '15.25%', '3': '8.75%', '5': '7.75%', '4': '5.17%', '6': '5.08%', '7': '2.67%', '8': '1.08%', '10': '0.83%', '9': '0.50%'})	(1.5, {'1': '85.34%', '2': '4.92%', '5': '2.37%', '3': '2.03%', '4': '1.61%', '8': '1.02%', '10': '0.93%', '6': '0.68%', '9': '0.59%', '7': '0.51%'})	(2.36, {'1': '48.09%', '2': '20.48%', '3': '10.79%', '4': '7.22%', '5': '5.52%', '6': '2.55%', '7': '2.21%', '8': '1.95%', '10': '0.68%', '9': '0.51%'})	(1.21, {'1': '93.52%', '2': '2.57%', '3': '1.06%', '5': '0.89%', '10': '0.71%', '4': '0.62%', '8': '0.35%', '9': '0.18%', '7': '0.09%'})	(3.19, {'1': '45.08%', '5': '16.42%', '3': '9.33%', '2': '7.25%', '4': '4.92%', '6': '4.83%', '7': '3.92%', '8': '3.50%', '10': '2.83%', '9': '1.92%'})	(2.53, {'1': '61.94%', '5': '8.09%', '3': '5.68%', '2': '5.42%', '4': '5.38%', '6': '4.22%', '7': '3.27%', '8': '2.80%', '10': '1.72%', '9': '1.51%'})	(1.85, {'1': '72.52%', '2': '10.16%', '3': '5.91%', '4': '3.08%', '10': '2.41%', '5': '2.08%', '7': '1.58%', '6': '1.00%', '8': '0.92%', '9': '0.33%'})								191	SOCIAL & CULTURAL IDENTITY
(2.55, {'1': '52.98%', '5': '12.34%', '4': '10.92%', '3': '9.74%', '6': '5.96%', '2': '5.12%', '7': '2.27%', '8': '0.50%', '9': '0.08%', '10': '0.08%'})	(1.5, {'1': '79.32%', '2': '8.41%', '3': '4.87%', '5': '4.20%', '4': '2.07%', '10': '0.40%', '7': '0.27%', '9': '0.20%', '8': '0.20%', '6': '0.07%'})	(2.62, {'1': '47.92%', '2': '13.83%', '3': '10.58%', '5': '9.00%', '4': '6.83%', '6': '6.33%', '7': '2.42%', '8': '1.58%', '10': '0.83%', '9': '0.67%'})	(1.59, {'1': '79.68%', '2': '6.08%', '3': '4.50%', '5': '3.66%', '4': '2.66%', '6': '1.33%', '7': '0.83%', '8': '0.50%', '10': '0.42%', '9': '0.33%'})	(2.05, {'1': '54.52%', '2': '19.23%', '3': '12.54%', '4': '5.77%', '5': '2.93%', '7': '1.67%', '6': '1.51%', '8': '1.00%', '9': '0.84%'})	(1.7, {'1': '82.41%', '3': '3.59%', '2': '3.15%', '5': '3.06%', '10': '2.45%', '4': '2.36%', '6': '1.31%', '9': '0.61%', '8': '0.52%', '7': '0.52%'})	(3.27, {'1': '43.42%', '5': '17.42%', '3': '8.17%', '4': '7.00%', '6': '6.58%', '2': '6.42%', '7': '3.50%', '8': '3.25%', '10': '3.17%', '9': '1.08%'})	(1.8, {'1': '75.47%', '3': '5.50%', '2': '5.21%', '4': '4.79%', '5': '3.00%', '7': '1.96%', '6': '1.92%', '8': '1.17%', '9': '0.67%', '10': '0.33%'})	(1.94, {'1': '65.61%', '2': '15.37%', '3': '5.98%', '4': '4.15%', '5': '2.74%', '10': '1.91%', '6': '1.83%', '8': '0.91%', '7': '0.91%', '9': '0.58%'})								192	SOCIAL & CULTURAL IDENTITY
(3.87, {'1': '22.34%', '5': '21.42%', '4': '17.24%', '3': '11.63%', '6': '8.45%', '2': '7.70%', '7': '6.03%', '8': '2.59%', '10': '1.76%', '9': '0.84%'})	(2.21, {'1': '71.09%', '5': '8.08%', '2': '6.34%', '10': '3.47%', '3': '3.34%', '7': '1.80%', '6': '1.67%', '8': '1.47%', '4': '1.47%', '9': '1.27%'})	(3.34, {'1': '32.83%', '5': '16.17%', '2': '12.58%', '3': '10.83%', '4': '9.58%', '6': '9.00%', '7': '4.42%', '8': '2.67%', '9': '1.00%', '10': '0.92%'})	(2.55, {'1': '55.76%', '5': '9.43%', '2': '8.18%', '4': '8.01%', '3': '7.76%', '6': '4.17%', '7': '2.42%', '8': '1.75%', '10': '1.67%', '9': '0.83%'})	(2.54, {'1': '40.78%', '2': '22.60%', '3': '13.51%', '4': '7.73%', '5': '6.63%', '6': '3.23%', '8': '2.38%', '7': '1.95%', '9': '0.93%', '10': '0.25%'})	(3.05, {'1': '53.19%', '5': '11.72%', '10': '6.82%', '3': '6.56%', '2': '5.77%', '4': '5.77%', '6': '4.55%', '7': '2.80%', '8': '1.57%', '9': '1.22%'})	(4.7, {'1': '25.00%', '5': '11.58%', '6': '11.33%', '2': '9.17%', '8': '8.67%', '7': '8.67%', '10': '8.00%', '4': '6.83%', '3': '5.50%', '9': '5.25%'})	(2.09, {'1': '66.08%', '3': '8.04%', '2': '7.17%', '4': '5.50%', '5': '5.21%', '6': '2.96%', '7': '2.42%', '8': '1.79%', '9': '0.58%', '10': '0.25%'})	(3.0, {'1': '47.76%', '2': '11.30%', '3': '8.64%', '5': '7.23%', '4': '6.73%', '6': '5.23%', '7': '4.07%', '8': '3.90%', '10': '3.74%', '9': '1.41%'})								193	SOCIAL & CULTURAL IDENTITY
(1.51, {'1': '77.77%', '2': '7.72%', '3': '6.38%', '5': '3.61%', '4': '3.52%', '6': '0.67%', '7': '0.34%'})	(1.81, {'1': '79.29%', '5': '6.28%', '2': '4.07%', '6': '2.67%', '4': '2.20%', '3': '2.07%', '10': '2.00%', '8': '0.73%', '7': '0.53%', '9': '0.13%'})	(2.49, {'1': '49.83%', '2': '14.83%', '3': '9.50%', '5': '9.25%', '6': '6.58%', '4': '5.92%', '7': '2.00%', '8': '1.08%', '9': '0.92%', '10': '0.08%'})	(1.41, {'1': '82.76%', '2': '6.99%', '3': '4.00%', '5': '3.08%', '4': '1.58%', '6': '0.92%', '8': '0.33%', '7': '0.33%'})	(2.01, {'1': '52.50%', '2': '23.67%', '3': '12.17%', '4': '4.92%', '5': '2.17%', '7': '1.50%', '8': '1.42%', '6': '0.83%', '9': '0.58%', '10': '0.25%'})	(1.31, {'1': '91.86%', '2': '2.19%', '5': '1.31%', '3': '1.14%', '4': '1.14%', '10': '0.96%', '7': '0.44%', '6': '0.44%', '9': '0.35%', '8': '0.18%'})	(2.82, {'1': '49.92%', '5': '15.50%', '2': '8.75%', '3': '7.67%', '4': '6.92%', '6': '3.33%', '7': '2.42%', '10': '2.33%', '8': '2.17%', '9': '1.00%'})	(1.95, {'1': '70.68%', '3': '6.38%', '2': '6.34%', '4': '5.71%', '5': '3.59%', '6': '2.79%', '7': '2.25%', '8': '0.96%', '9': '0.92%', '10': '0.38%'})	(1.49, {'1': '77.18%', '2': '12.03%', '3': '4.48%', '4': '2.57%', '5': '1.83%', '6': '0.58%', '8': '0.50%', '7': '0.33%', '10': '0.33%', '9': '0.17%'})								194	SOCIAL & CULTURAL IDENTITY
(1.09, {'1': '94.19%', '2': '4.23%', '3': '0.53%', '4': '0.53%', '5': '0.44%', '10': '0.09%'})	(1.65, {'1': '84.06%', '5': '4.31%', '2': '3.42%', '10': '1.92%', '3': '1.71%', '4': '1.64%', '8': '0.96%', '6': '0.96%', '7': '0.62%', '9': '0.41%'})	(2.46, {'1': '53.67%', '2': '14.75%', '3': '7.83%', '5': '7.42%', '6': '6.25%', '4': '4.17%', '7': '2.25%', '9': '1.42%', '8': '1.33%', '10': '0.92%'})	(1.28, {'1': '87.63%', '2': '6.10%', '3': '2.93%', '4': '0.92%', '5': '0.92%', '6': '0.59%', '7': '0.59%', '10': '0.25%', '8': '0.08%'})	(1.82, {'1': '63.68%', '2': '18.41%', '3': '7.87%', '4': '4.02%', '8': '1.59%', '5': '1.51%', '7': '1.00%', '6': '0.92%', '9': '0.59%', '10': '0.42%'})	(1.12, {'1': '95.84%', '2': '1.77%', '3': '0.71%', '5': '0.53%', '4': '0.35%', '10': '0.35%', '8': '0.18%', '7': '0.09%', '9': '0.09%', '6': '0.09%'})	(2.35, {'1': '60.08%', '5': '15.08%', '2': '9.67%', '3': '4.33%', '4': '4.08%', '6': '2.50%', '7': '1.67%', '10': '1.33%', '8': '0.83%', '9': '0.42%'})		(1.35, {'1': '82.61%', '2': '9.07%', '3': '4.08%', '4': '2.16%', '5': '1.16%', '8': '0.33%', '10': '0.25%', '7': '0.25%', '6': '0.08%'})								195	SOCIAL & CULTURAL IDENTITY
				(2.18, {'1': '54.00%', '2': '18.42%', '3': '11.75%', '4': '4.50%', '5': '4.00%', '7': '2.17%', '8': '2.17%', '6': '1.92%', '9': '0.67%', '10': '0.42%'})	(1.06, {'1': '97.17%', '2': '1.50%', '3': '0.71%', '10': '0.18%', '5': '0.18%', '4': '0.18%', '9': '0.09%'})	(2.74, {'1': '51.25%', '5': '16.58%', '2': '10.00%', '4': '6.42%', '3': '5.42%', '6': '3.67%', '8': '2.25%', '7': '1.92%', '10': '1.58%', '9': '0.92%'})	(2.35, {'1': '62.85%', '5': '7.43%', '4': '6.84%', '2': '6.33%', '3': '6.04%', '6': '4.01%', '7': '2.70%', '8': '1.65%', '9': '1.18%', '10': '0.97%'})	(1.37, {'1': '81.63%', '2': '8.98%', '3': '5.32%', '4': '2.00%', '5': '1.00%', '6': '0.42%', '10': '0.33%', '8': '0.17%', '9': '0.08%', '7': '0.08%'})								196	SOCIAL & CULTURAL IDENTITY
(1.12, {'1': '93.52%', '2': '4.02%', '3': '1.19%', '4': '0.64%', '5': '0.37%', '6': '0.18%', '10': '0.09%'})	(1.97, {'1': '76.14%', '5': '7.38%', '2': '3.69%', '3': '3.42%', '10': '3.01%', '4': '2.87%', '8': '1.37%', '6': '1.03%', '7': '0.89%', '9': '0.21%'})	(2.65, {'1': '50.33%', '2': '12.00%', '3': '11.08%', '5': '7.50%', '6': '7.33%', '4': '4.75%', '7': '2.67%', '8': '1.83%', '10': '1.25%', '9': '1.25%'})	(1.3, {'1': '87.03%', '2': '5.94%', '3': '2.51%', '5': '1.67%', '4': '1.59%', '6': '0.59%', '8': '0.17%', '10': '0.17%', '7': '0.17%', '9': '0.17%'})	(1.97, {'1': '54.18%', '2': '22.91%', '3': '10.95%', '4': '4.85%', '5': '3.09%', '6': '1.42%', '8': '1.09%', '7': '1.00%', '9': '0.25%', '10': '0.25%'})	(1.19, {'1': '94.68%', '2': '1.86%', '5': '1.24%', '10': '0.53%', '3': '0.44%', '7': '0.35%', '8': '0.35%', '4': '0.35%', '9': '0.09%', '6': '0.09%'})	(2.54, {'1': '57.83%', '5': '18.08%', '2': '7.42%', '4': '4.75%', '3': '4.17%', '6': '2.83%', '10': '1.83%', '7': '1.42%', '8': '0.92%', '9': '0.75%'})		(1.35, {'1': '82.26%', '2': '8.99%', '3': '4.75%', '4': '2.16%', '5': '0.75%', '6': '0.33%', '7': '0.33%', '10': '0.17%', '8': '0.17%', '9': '0.08%'})								197	SOCIAL & CULTURAL IDENTITY
(6.64, {'10': '27.28%', '5': '14.37%', '1': '14.03%', '7': '12.65%', '8': '10.50%', '6': '10.24%', '9': '6.20%', '4': '2.41%', '2': '1.20%', '3': '1.12%'})	(6.86, {'10': '28.03%', '6': '12.40%', '7': '10.65%', '5': '10.18%', '9': '10.11%', '1': '9.97%', '8': '9.70%', '4': '3.50%', '2': '2.90%', '3': '2.56%'})	(4.96, {'1': '22.92%', '5': '15.00%', '6': '11.08%', '10': '8.75%', '7': '8.33%', '8': '8.33%', '9': '7.08%', '2': '6.42%', '4': '6.33%', '3': '5.75%'})	(5.34, {'1': '25.36%', '10': '16.29%', '5': '13.85%', '8': '9.99%', '7': '8.48%', '6': '6.55%', '9': '6.30%', '4': '5.63%', '2': '4.37%', '3': '3.19%'})	(3.84, {'1': '23.13%', '2': '17.88%', '3': '13.33%', '5': '11.18%', '4': '9.11%', '7': '6.88%', '8': '6.19%', '6': '6.19%', '9': '3.53%', '10': '2.58%'})	(4.54, {'1': '36.94%', '10': '15.74%', '5': '15.56%', '6': '8.05%', '7': '5.99%', '4': '4.56%', '3': '3.94%', '8': '3.67%', '9': '3.04%', '2': '2.50%'})	(4.3, {'1': '34.50%', '5': '11.83%', '10': '8.92%', '3': '7.83%', '6': '7.75%', '7': '7.33%', '4': '6.33%', '8': '5.42%', '9': '5.33%', '2': '4.75%'})	(3.29, {'1': '51.32%', '5': '7.22%', '6': '7.01%', '4': '5.86%', '10': '5.82%', '2': '5.73%', '7': '5.61%', '3': '5.23%', '8': '3.95%', '9': '2.25%'})	(3.36, {'1': '48.42%', '2': '8.74%', '10': '6.99%', '3': '6.99%', '5': '6.57%', '4': '5.32%', '6': '4.83%', '8': '4.66%', '7': '4.49%', '9': '3.00%'})								198	SOCIAL & CULTURAL IDENTITY
	(2.16, {'2': '50.85%', '1': '22.58%', '3': '14.20%', '4': '12.37%'})	(1.72, {'1': '60.34%', '2': '18.22%', '4': '11.02%', '3': '10.42%'})	(1.95, {'1': '51.17%', '2': '21.61%', '4': '19.26%', '3': '7.96%'})	(2.51, {'2': '32.16%', '4': '27.81%', '1': '22.19%', '3': '17.84%'})	(2.24, {'1': '33.39%', '2': '31.53%', '4': '22.63%', '3': '12.46%'})	(2.57, {'4': '31.17%', '2': '28.58%', '1': '22.67%', '3': '17.58%'})	(3.04, {'4': '41.31%', '3': '29.93%', '2': '20.33%', '1': '8.43%'})	(2.23, {'1': '35.53%', '2': '26.39%', '4': '20.32%', '3': '17.76%'})								199	SOCIAL & CULTURAL IDENTITY
	(2.55, {'2': '39.27%', '3': '23.10%', '4': '23.03%', '1': '14.61%'})	(2.43, {'1': '31.99%', '4': '28.31%', '2': '21.81%', '3': '17.88%'})	(2.34, {'1': '33.33%', '4': '26.94%', '2': '26.35%', '3': '13.38%'})	(2.65, {'2': '34.67%', '4': '30.23%', '3': '19.68%', '1': '15.41%'})	(2.75, {'4': '37.57%', '2': '24.68%', '1': '19.17%', '3': '18.58%'})	(3.21, {'4': '49.67%', '3': '25.92%', '2': '20.33%', '1': '4.08%'})	(3.23, {'4': '45.71%', '3': '36.44%', '2': '12.78%', '1': '5.07%'})	(2.58, {'4': '30.43%', '1': '25.43%', '3': '22.33%', '2': '21.81%'})								200	SOCIAL & CULTURAL IDENTITY
	(2.51, {'2': '33.56%', '4': '25.02%', '3': '21.25%', '1': '20.17%'})	(2.0, {'1': '47.20%', '2': '21.65%', '4': '16.38%', '3': '14.77%'})	(2.18, {'1': '36.49%', '2': '29.28%', '4': '20.13%', '3': '14.09%'})	(2.52, {'2': '37.94%', '4': '25.29%', '3': '19.01%', '1': '17.76%'})	(2.24, {'1': '36.92%', '2': '26.16%', '4': '23.88%', '3': '13.04%'})	(3.15, {'4': '47.25%', '3': '25.75%', '2': '22.08%', '1': '4.92%'})	(3.21, {'4': '46.02%', '3': '34.50%', '2': '13.64%', '1': '5.84%'})	(2.54, {'4': '29.20%', '1': '26.71%', '3': '22.26%', '2': '21.83%'})								201	SOCIAL & CULTURAL IDENTITY
(3.07, {'4': '39.08%', '3': '31.97%', '2': '25.44%', '1': '3.51%'})	(2.53, {'2': '39.57%', '3': '25.67%', '4': '20.59%', '1': '14.17%'})	(2.82, {'2': '32.97%', '4': '30.94%', '3': '27.90%', '1': '8.20%'})	(2.73, {'2': '36.63%', '4': '30.76%', '3': '21.79%', '1': '10.81%'})	(2.68, {'2': '37.08%', '3': '34.42%', '4': '20.67%', '1': '7.83%'})	(2.46, {'2': '48.19%', '3': '26.70%', '4': '14.78%', '1': '10.33%'})	(2.52, {'2': '43.92%', '3': '30.42%', '4': '15.83%', '1': '9.83%'})	(2.55, {'2': '45.59%', '3': '31.97%', '4': '15.21%', '1': '7.23%'})	(2.91, {'3': '35.11%', '4': '30.55%', '2': '29.54%', '1': '4.81%'})								202	GOVERNANCE & POLITICAL SYSTEMS
(2.51, {'3': '54.48%', '2': '41.74%', '1': '3.77%'})	(2.17, {'2': '50.27%', '3': '33.31%', '1': '16.42%'})	(2.35, {'3': '45.60%', '2': '44.14%', '1': '10.26%'})	(2.4, {'3': '51.01%', '2': '37.58%', '1': '11.40%'})	(2.14, {'2': '53.00%', '3': '30.50%', '1': '16.50%'})	(2.12, {'2': '48.06%', '3': '31.87%', '1': '20.07%'})	(2.12, {'2': '55.25%', '3': '28.42%', '1': '16.33%'})	(2.22, {'2': '61.10%', '3': '30.59%', '1': '8.30%'})	(2.34, {'2': '46.24%', '3': '43.70%', '1': '10.06%'})								203	GOVERNANCE & POLITICAL SYSTEMS
(4.5, {'5': '78.45%', '2': '8.19%', '4': '7.52%', '1': '2.92%', '3': '2.92%'})	(4.08, {'5': '59.20%', '3': '13.51%', '2': '12.44%', '4': '10.50%', '1': '4.35%'})	(4.14, {'5': '58.86%', '4': '17.72%', '3': '8.82%', '2': '8.06%', '1': '6.55%'})	(4.49, {'5': '77.12%', '4': '10.06%', '1': '5.70%', '2': '4.27%', '3': '2.85%'})	(4.37, {'5': '68.58%', '4': '14.92%', '2': '7.33%', '3': '5.33%', '1': '3.83%'})	(4.47, {'5': '68.57%', '4': '21.18%', '1': '4.18%', '3': '3.07%', '2': '2.99%'})	(3.97, {'5': '53.08%', '4': '19.42%', '1': '10.58%', '3': '9.92%', '2': '7.00%'})	(3.01, {'5': '29.56%', '1': '24.71%', '2': '19.36%', '3': '16.14%', '4': '10.24%'})	(4.11, {'5': '58.76%', '4': '19.28%', '1': '9.56%', '2': '6.71%', '3': '5.70%'})								204	GOVERNANCE & POLITICAL SYSTEMS
(2.35, {'1': '43.94%', '2': '22.31%', '5': '17.29%', '4': '10.36%', '3': '6.10%'})	(1.65, {'1': '63.06%', '2': '22.38%', '3': '6.75%', '5': '6.01%', '4': '1.80%'})	(2.05, {'1': '51.88%', '2': '21.05%', '5': '10.44%', '4': '8.77%', '3': '7.85%'})	(2.33, {'1': '45.63%', '2': '20.40%', '5': '17.99%', '4': '9.16%', '3': '6.83%'})	(2.02, {'1': '58.58%', '2': '15.42%', '5': '13.50%', '4': '7.42%', '3': '5.08%'})	(2.33, {'1': '45.78%', '2': '19.31%', '4': '14.59%', '5': '14.42%', '3': '5.90%'})	(2.39, {'1': '44.67%', '2': '17.67%', '5': '17.17%', '4': '11.92%', '3': '8.58%'})	(1.37, {'1': '78.60%', '2': '12.47%', '3': '4.70%', '5': '2.12%', '4': '2.12%'})	(1.81, {'1': '67.86%', '2': '10.74%', '5': '9.58%', '4': '8.58%', '3': '3.25%'})								205	GOVERNANCE & POLITICAL SYSTEMS
(4.38, {'5': '75.40%', '2': '8.09%', '4': '7.17%', '1': '6.01%', '3': '3.34%'})	(3.52, {'5': '46.89%', '1': '18.57%', '2': '14.36%', '3': '10.49%', '4': '9.69%'})	(3.95, {'5': '53.37%', '4': '16.03%', '3': '11.94%', '2': '9.80%', '1': '8.87%'})	(4.2, {'5': '68.53%', '4': '10.18%', '1': '10.18%', '2': '6.68%', '3': '4.42%'})	(3.76, {'5': '46.33%', '4': '19.92%', '1': '12.58%', '2': '11.75%', '3': '9.42%'})	(3.57, {'5': '42.02%', '4': '21.52%', '1': '18.70%', '2': '11.36%', '3': '6.40%'})	(3.38, {'5': '32.08%', '4': '25.75%', '1': '20.83%', '2': '10.75%', '3': '10.58%'})	(3.44, {'5': '38.10%', '2': '15.75%', '1': '15.71%', '3': '15.62%', '4': '14.83%'})	(2.51, {'1': '48.96%', '5': '20.20%', '4': '17.29%', '2': '8.89%', '3': '4.66%'})								206	GOVERNANCE & POLITICAL SYSTEMS
(4.36, {'5': '78.31%', '1': '10.05%', '2': '5.36%', '4': '4.77%', '3': '1.51%'})	(2.13, {'1': '58.26%', '5': '20.20%', '2': '14.11%', '3': '4.48%', '4': '2.94%'})	(3.06, {'5': '34.29%', '1': '33.19%', '4': '13.60%', '2': '10.22%', '3': '8.70%'})	(3.27, {'5': '47.58%', '1': '32.86%', '2': '8.44%', '4': '5.69%', '3': '5.43%'})	(2.96, {'1': '34.42%', '5': '32.58%', '4': '13.08%', '2': '12.92%', '3': '7.00%'})	(2.16, {'1': '60.78%', '5': '17.75%', '4': '10.06%', '2': '7.95%', '3': '3.47%'})	(2.63, {'1': '46.17%', '5': '27.92%', '2': '10.17%', '4': '9.42%', '3': '6.33%'})	(1.77, {'1': '68.82%', '5': '11.95%', '2': '11.57%', '3': '5.37%', '4': '2.29%'})	(3.16, {'5': '41.74%', '1': '38.73%', '4': '13.50%', '2': '3.86%', '3': '2.18%'})								207	GOVERNANCE & POLITICAL SYSTEMS
(4.6, {'5': '84.56%', '1': '4.87%', '4': '3.86%', '2': '3.36%', '3': '3.36%'})	(4.23, {'5': '65.37%', '3': '11.50%', '4': '10.29%', '2': '7.15%', '1': '5.68%'})	(3.69, {'5': '49.36%', '1': '18.98%', '4': '15.15%', '3': '9.45%', '2': '7.06%'})	(3.86, {'5': '62.65%', '1': '19.60%', '4': '6.62%', '2': '6.45%', '3': '4.69%'})	(3.52, {'5': '44.17%', '1': '20.92%', '4': '15.58%', '2': '9.83%', '3': '9.50%'})	(3.55, {'5': '44.86%', '1': '23.36%', '4': '19.20%', '2': '7.14%', '3': '5.44%'})	(3.58, {'5': '42.92%', '4': '17.25%', '1': '17.08%', '3': '11.50%', '2': '11.25%'})	(3.24, {'5': '39.02%', '1': '25.51%', '2': '13.05%', '3': '12.63%', '4': '9.79%'})	(3.85, {'5': '58.16%', '1': '19.28%', '4': '13.13%', '2': '5.72%', '3': '3.70%'})								208	GOVERNANCE & POLITICAL SYSTEMS
(4.08, {'5': '69.43%', '1': '12.40%', '2': '9.88%', '3': '4.36%', '4': '3.94%'})	(2.24, {'1': '53.21%', '5': '21.52%', '2': '16.24%', '3': '5.15%', '4': '3.88%'})	(2.73, {'1': '41.36%', '5': '29.75%', '2': '12.80%', '4': '9.07%', '3': '7.03%'})	(3.02, {'5': '41.19%', '1': '37.34%', '2': '11.70%', '4': '6.10%', '3': '3.68%'})	(2.95, {'1': '35.25%', '5': '33.42%', '2': '12.58%', '4': '10.92%', '3': '7.83%'})	(2.34, {'1': '51.01%', '5': '18.63%', '2': '13.58%', '4': '12.39%', '3': '4.38%'})	(2.3, {'1': '52.42%', '5': '21.25%', '2': '14.25%', '4': '6.08%', '3': '6.00%'})	(1.89, {'1': '65.06%', '5': '14.58%', '2': '13.16%', '3': '4.46%', '4': '2.75%'})	(3.22, {'5': '45.38%', '1': '35.71%', '4': '9.33%', '2': '6.30%', '3': '3.28%'})								209	GOVERNANCE & POLITICAL SYSTEMS
(3.64, {'5': '62.14%', '1': '25.96%', '2': '9.21%', '4': '1.34%', '3': '1.34%'})	(2.15, {'1': '61.10%', '5': '20.99%', '2': '8.29%', '3': '5.95%', '4': '3.68%'})	(2.32, {'1': '54.97%', '5': '22.47%', '2': '9.76%', '4': '6.90%', '3': '5.89%'})	(2.57, {'1': '53.34%', '5': '32.97%', '2': '6.76%', '4': '4.42%', '3': '2.50%'})	(2.36, {'1': '55.25%', '5': '23.25%', '2': '8.25%', '4': '7.92%', '3': '5.33%'})	(1.95, {'1': '65.12%', '5': '13.60%', '2': '10.73%', '4': '8.78%', '3': '1.77%'})	(1.74, {'1': '69.67%', '2': '12.67%', '5': '10.92%', '4': '3.67%', '3': '3.08%'})	(1.92, {'1': '65.03%', '5': '15.59%', '2': '11.98%', '3': '4.20%', '4': '3.20%'})	(2.73, {'1': '50.13%', '5': '36.02%', '4': '6.21%', '2': '5.21%', '3': '2.43%'})								210	GOVERNANCE & POLITICAL SYSTEMS
(3.48, {'5': '41.59%', '2': '21.67%', '4': '14.48%', '1': '14.14%', '3': '8.12%'})	(2.5, {'2': '31.84%', '1': '29.17%', '5': '14.55%', '3': '13.75%', '4': '10.68%'})	(2.24, {'1': '47.10%', '2': '20.49%', '5': '14.95%', '4': '8.82%', '3': '8.65%'})	(2.58, {'1': '37.41%', '2': '21.17%', '5': '20.25%', '4': '13.72%', '3': '7.45%'})	(2.17, {'1': '55.83%', '5': '15.92%', '2': '12.17%', '4': '8.58%', '3': '7.50%'})	(2.01, {'1': '54.05%', '2': '19.39%', '4': '11.30%', '5': '8.43%', '3': '6.83%'})	(2.16, {'1': '51.75%', '4': '15.08%', '2': '14.00%', '3': '10.08%', '5': '9.08%'})	(2.07, {'1': '42.96%', '2': '29.83%', '3': '12.71%', '5': '8.17%', '4': '6.33%'})	(2.47, {'1': '50.71%', '5': '20.87%', '4': '15.84%', '2': '9.47%', '3': '3.10%'})								211	GOVERNANCE & POLITICAL SYSTEMS
(2.83, {'3': '88.84%', '1': '6.09%', '2': '5.06%'})	(2.34, {'3': '45.76%', '2': '42.58%', '1': '11.66%'})	(2.63, {'3': '74.70%', '2': '13.81%', '1': '11.49%'})	(2.71, {'3': '78.30%', '2': '13.91%', '1': '7.79%'})	(2.62, {'3': '73.25%', '2': '15.95%', '1': '10.80%'})	(2.63, {'3': '71.66%', '2': '19.66%', '1': '8.68%'})	(2.32, {'3': '44.25%', '2': '43.00%', '1': '12.75%'})	(2.4, {'3': '48.90%', '2': '42.54%', '1': '8.56%'})	(2.69, {'3': '76.34%', '2': '16.54%', '1': '7.12%'})								212	GOVERNANCE & POLITICAL SYSTEMS
(2.89, {'3': '92.34%', '2': '4.26%', '1': '3.40%'})	(2.35, {'3': '49.73%', '2': '35.07%', '1': '15.20%'})	(2.77, {'3': '82.70%', '2': '11.22%', '1': '6.09%'})	(2.7, {'3': '77.19%', '2': '15.15%', '1': '7.66%'})	(2.72, {'3': '78.17%', '2': '15.57%', '1': '6.26%'})	(2.57, {'3': '66.00%', '2': '25.04%', '1': '8.96%'})	(2.07, {'2': '36.33%', '3': '35.25%', '1': '28.42%'})	(2.56, {'3': '60.37%', '2': '35.19%', '1': '4.44%'})	(2.64, {'3': '70.45%', '2': '22.73%', '1': '6.82%'})								213	GOVERNANCE & POLITICAL SYSTEMS
(2.93, {'3': '95.23%', '1': '2.39%', '2': '2.39%'})	(2.41, {'3': '52.49%', '2': '36.34%', '1': '11.17%'})	(2.57, {'3': '71.47%', '1': '14.65%', '2': '13.88%'})	(2.76, {'3': '81.74%', '2': '12.83%', '1': '5.43%'})	(2.64, {'3': '74.38%', '2': '15.32%', '1': '10.30%'})	(2.45, {'3': '59.72%', '2': '25.90%', '1': '14.37%'})	(2.17, {'2': '41.17%', '3': '38.00%', '1': '20.83%'})	(2.42, {'3': '48.41%', '2': '44.76%', '1': '6.82%'})	(2.56, {'3': '65.95%', '2': '23.96%', '1': '10.09%'})								214	GOVERNANCE & POLITICAL SYSTEMS
(2.98, {'3': '98.04%', '2': '1.45%', '1': '0.51%'})	(2.69, {'3': '71.84%', '2': '25.39%', '1': '2.77%'})	(2.76, {'3': '83.02%', '2': '10.43%', '1': '6.55%'})	(2.79, {'3': '83.42%', '2': '11.86%', '1': '4.73%'})	(2.66, {'3': '75.58%', '2': '15.29%', '1': '9.14%'})	(2.63, {'3': '70.28%', '2': '22.39%', '1': '7.32%'})	(2.31, {'2': '46.00%', '3': '42.42%', '1': '11.58%'})	(2.56, {'3': '59.18%', '2': '37.75%', '1': '3.07%'})	(2.66, {'3': '72.83%', '2': '20.02%', '1': '7.16%'})								215	GOVERNANCE & POLITICAL SYSTEMS
(2.59, {'3': '74.58%', '1': '15.51%', '2': '9.92%'})	(1.97, {'2': '36.22%', '1': '33.40%', '3': '30.38%'})	(2.06, {'3': '42.39%', '1': '36.46%', '2': '21.15%'})	(2.56, {'3': '68.91%', '2': '17.73%', '1': '13.36%'})	(2.25, {'3': '52.91%', '1': '27.43%', '2': '19.66%'})	(1.9, {'1': '38.93%', '2': '31.86%', '3': '29.22%'})	(2.16, {'2': '43.25%', '3': '36.33%', '1': '20.42%'})	(2.22, {'2': '48.10%', '3': '36.81%', '1': '15.09%'})	(2.45, {'3': '56.65%', '2': '31.22%', '1': '12.13%'})								216	GOVERNANCE & POLITICAL SYSTEMS
(2.63, {'3': '74.77%', '2': '13.00%', '1': '12.23%'})	(2.02, {'2': '55.44%', '3': '23.05%', '1': '21.51%'})	(2.72, {'3': '79.74%', '2': '12.70%', '1': '7.55%'})	(2.72, {'3': '79.83%', '2': '12.33%', '1': '7.84%'})	(2.7, {'3': '75.73%', '2': '18.12%', '1': '6.15%'})	(2.64, {'3': '71.70%', '2': '20.15%', '1': '8.15%'})	(2.39, {'2': '50.17%', '3': '44.50%', '1': '5.33%'})	(2.4, {'2': '48.24%', '3': '45.75%', '1': '6.01%'})	(2.67, {'3': '71.65%', '2': '23.76%', '1': '4.59%'})								217	GOVERNANCE & POLITICAL SYSTEMS
(2.92, {'3': '94.00%', '2': '4.28%', '1': '1.71%'})	(2.05, {'3': '35.98%', '2': '33.29%', '1': '30.73%'})	(2.69, {'3': '78.09%', '2': '13.13%', '1': '8.78%'})	(2.86, {'3': '89.24%', '2': '7.20%', '1': '3.56%'})	(2.68, {'3': '75.06%', '2': '18.07%', '1': '6.87%'})	(2.65, {'3': '72.09%', '2': '21.15%', '1': '6.76%'})	(2.45, {'3': '55.50%', '2': '33.75%', '1': '10.75%'})	(2.59, {'3': '63.96%', '2': '30.98%', '1': '5.06%'})	(2.76, {'3': '79.49%', '2': '16.96%', '1': '3.56%'})								218	GOVERNANCE & POLITICAL SYSTEMS
(2.62, {'3': '75.64%', '1': '13.97%', '2': '10.39%'})	(1.62, {'1': '57.06%', '2': '23.68%', '3': '19.26%'})	(2.37, {'3': '61.75%', '1': '24.87%', '2': '13.38%'})	(2.58, {'3': '72.07%', '1': '14.22%', '2': '13.71%'})	(2.51, {'3': '66.04%', '2': '19.16%', '1': '14.80%'})	(2.09, {'3': '40.44%', '1': '31.31%', '2': '28.24%'})	(2.41, {'3': '52.25%', '2': '36.25%', '1': '11.50%'})	(2.44, {'3': '52.13%', '2': '39.82%', '1': '8.05%'})	(2.6, {'3': '69.75%', '2': '20.28%', '1': '9.96%'})								219	GOVERNANCE & POLITICAL SYSTEMS
	(2.11, {'3': '40.38%', '2': '30.05%', '1': '29.58%'})	(2.5, {'3': '67.09%', '1': '17.09%', '2': '15.82%'})	(2.55, {'3': '71.83%', '1': '17.03%', '2': '11.14%'})	(2.39, {'3': '60.59%', '1': '21.09%', '2': '18.32%'})	(2.22, {'3': '50.95%', '1': '29.04%', '2': '20.02%'})	(1.89, {'1': '38.25%', '2': '34.42%', '3': '27.33%'})	(2.21, {'2': '44.59%', '3': '38.26%', '1': '17.15%'})	(2.58, {'3': '70.25%', '2': '17.85%', '1': '11.90%'})								220	GOVERNANCE & POLITICAL SYSTEMS
	(2.18, {'3': '41.24%', '2': '35.24%', '1': '23.52%'})	(2.84, {'3': '88.19%', '2': '8.10%', '1': '3.71%'})	(2.91, {'3': '92.74%', '2': '5.39%', '1': '1.87%'})	(2.78, {'3': '81.77%', '2': '14.40%', '1': '3.83%'})	(2.8, {'3': '83.61%', '2': '12.29%', '1': '4.10%'})	(2.33, {'3': '44.58%', '2': '44.08%', '1': '11.33%'})	(2.48, {'3': '53.82%', '2': '40.13%', '1': '6.05%'})	(2.79, {'3': '82.89%', '2': '13.65%', '1': '3.46%'})								221	GOVERNANCE & POLITICAL SYSTEMS
	(2.36, {'3': '55.06%', '2': '25.49%', '1': '19.45%'})	(2.75, {'3': '81.17%', '2': '12.18%', '1': '6.65%'})	(2.89, {'3': '91.92%', '2': '5.46%', '1': '2.62%'})	(2.72, {'3': '77.39%', '2': '17.53%', '1': '5.08%'})	(2.68, {'3': '74.53%', '2': '18.74%', '1': '6.74%'})	(2.53, {'3': '59.42%', '2': '33.75%', '1': '6.83%'})	(2.42, {'3': '48.00%', '2': '46.33%', '1': '5.67%'})	(2.74, {'3': '78.82%', '2': '16.18%', '1': '5.00%'})								222	GOVERNANCE & POLITICAL SYSTEMS
	(2.65, {'3': '66.11%', '2': '32.68%', '1': '1.21%'})	(2.81, {'3': '84.58%', '2': '11.79%', '1': '3.64%'})	(2.93, {'3': '94.66%', '2': '3.59%', '1': '1.74%'})	(2.76, {'3': '81.10%', '2': '13.66%', '1': '5.24%'})	(2.82, {'3': '85.66%', '2': '11.05%', '1': '3.28%'})	(2.52, {'3': '58.33%', '2': '35.50%', '1': '6.17%'})	(2.56, {'3': '59.33%', '2': '37.48%', '1': '3.19%'})	(2.83, {'3': '86.10%', '2': '10.85%', '1': '3.05%'})								223	GOVERNANCE & POLITICAL SYSTEMS
(2.49, {'3': '63.90%', '2': '20.94%', '1': '15.16%'})	(1.69, {'1': '45.14%', '2': '40.99%', '3': '13.86%'})	(1.91, {'1': '45.59%', '3': '36.18%', '2': '18.22%'})	(1.87, {'1': '47.29%', '3': '34.41%', '2': '18.30%'})	(1.6, {'1': '59.06%', '2': '22.06%', '3': '18.88%'})	(1.89, {'1': '40.17%', '2': '31.03%', '3': '28.79%'})	(2.02, {'2': '39.36%', '3': '31.21%', '1': '29.43%'})	(1.33, {'1': '69.57%', '2': '27.75%', '3': '2.68%'})	(2.02, {'3': '38.22%', '1': '36.47%', '2': '25.31%'})								224	GOVERNANCE & POLITICAL SYSTEMS
(2.03, {'3': '34.55%', '2': '33.93%', '1': '31.52%'})	(1.57, {'1': '51.56%', '2': '40.16%', '3': '8.28%'})	(1.49, {'1': '75.59%', '3': '24.41%'})	(1.85, {'1': '48.83%', '3': '33.42%', '2': '17.75%'})	(1.57, {'1': '61.06%', '2': '20.61%', '3': '18.33%'})	(1.96, {'1': '37.61%', '3': '34.08%', '2': '28.31%'})	(2.07, {'2': '37.54%', '3': '34.56%', '1': '27.90%'})	(1.31, {'1': '71.15%', '2': '26.26%', '3': '2.60%'})	(1.99, {'1': '36.88%', '3': '36.01%', '2': '27.11%'})								225	GOVERNANCE & POLITICAL SYSTEMS
(2.69, {'2': '33.67%', '4': '27.25%', '3': '26.80%', '1': '12.27%'})	(1.9, {'1': '49.17%', '2': '24.23%', '3': '13.87%', '4': '12.72%'})	(3.07, {'4': '42.92%', '3': '31.09%', '2': '15.63%', '1': '10.36%'})	(2.67, {'2': '34.90%', '4': '27.49%', '3': '24.95%', '1': '12.66%'})	(2.54, {'2': '40.44%', '3': '29.23%', '4': '18.27%', '1': '12.06%'})	(2.34, {'1': '36.40%', '3': '29.55%', '4': '20.54%', '2': '13.51%'})	(1.99, {'2': '38.50%', '1': '34.83%', '3': '19.67%', '4': '7.00%'})	(2.0, {'1': '37.56%', '2': '33.39%', '3': '20.40%', '4': '8.64%'})	(2.35, {'1': '28.33%', '2': '27.09%', '3': '25.38%', '4': '19.20%'})								226	GOVERNANCE & POLITICAL SYSTEMS
(2.53, {'3': '30.37%', '2': '28.65%', '4': '21.35%', '1': '19.63%'})	(2.49, {'2': '31.82%', '3': '28.57%', '4': '19.94%', '1': '19.66%'})	(2.88, {'3': '34.74%', '4': '32.39%', '2': '21.53%', '1': '11.35%'})	(2.82, {'4': '34.58%', '2': '29.80%', '3': '24.40%', '1': '11.21%'})	(2.71, {'3': '34.24%', '2': '33.54%', '4': '22.88%', '1': '9.34%'})	(2.57, {'4': '28.06%', '3': '27.04%', '1': '26.20%', '2': '18.70%'})	(2.74, {'3': '32.08%', '2': '30.50%', '4': '26.33%', '1': '11.08%'})	(2.8, {'3': '32.26%', '2': '30.86%', '4': '28.18%', '1': '8.70%'})	(2.76, {'3': '31.85%', '2': '28.94%', '4': '27.70%', '1': '11.51%'})								227	GOVERNANCE & POLITICAL SYSTEMS
	(2.27, {'2': '37.30%', '1': '24.89%', '3': '23.81%', '4': '14.00%'})				(1.94, {'1': '46.74%', '2': '23.32%', '3': '19.57%', '4': '10.37%'})	(2.34, {'2': '30.75%', '3': '26.25%', '1': '26.17%', '4': '16.83%'})	(2.4, {'2': '40.38%', '3': '30.60%', '1': '16.29%', '4': '12.74%'})	(1.98, {'1': '37.36%', '2': '33.46%', '3': '23.29%', '4': '5.89%'})								228	GOVERNANCE & POLITICAL SYSTEMS
(2.05, {'1': '39.35%', '3': '29.25%', '2': '24.09%', '4': '7.31%'})	(2.55, {'3': '27.34%', '4': '25.52%', '2': '24.06%', '1': '23.08%'})	(1.87, {'1': '52.10%', '2': '21.05%', '3': '14.63%', '4': '12.22%'})	(1.8, {'1': '48.00%', '2': '33.24%', '3': '9.60%', '4': '9.16%'})	(1.92, {'1': '39.61%', '2': '35.93%', '3': '17.11%', '4': '7.36%'})	(2.1, {'1': '40.96%', '2': '22.51%', '3': '22.32%', '4': '14.21%'})	(1.9, {'2': '38.58%', '1': '37.67%', '3': '19.92%', '4': '3.83%'})	(2.66, {'2': '32.68%', '3': '29.91%', '4': '24.47%', '1': '12.94%'})	(1.97, {'1': '38.60%', '2': '31.96%', '3': '23.27%', '4': '6.17%'})								229	GOVERNANCE & POLITICAL SYSTEMS
(2.99, {'4': '35.36%', '3': '33.66%', '2': '25.88%', '1': '5.10%'})	(2.47, {'2': '28.29%', '4': '24.84%', '1': '24.77%', '3': '22.10%'})	(2.4, {'2': '29.39%', '1': '25.60%', '3': '24.18%', '4': '20.83%'})	(2.52, {'2': '36.13%', '3': '27.45%', '4': '20.45%', '1': '15.97%'})	(2.42, {'2': '46.25%', '3': '34.07%', '1': '10.56%', '4': '9.11%'})	(2.55, {'3': '30.48%', '1': '26.39%', '4': '25.66%', '2': '17.47%'})	(2.22, {'2': '44.08%', '3': '28.00%', '1': '20.75%', '4': '7.17%'})	(2.46, {'2': '40.08%', '3': '31.03%', '4': '14.47%', '1': '14.42%'})	(2.33, {'2': '34.08%', '3': '31.09%', '1': '22.47%', '4': '12.36%'})								230	GOVERNANCE & POLITICAL SYSTEMS
(2.65, {'2': '34.34%', '3': '29.02%', '4': '24.05%', '1': '12.60%'})	(2.13, {'2': '35.71%', '1': '31.63%', '3': '20.21%', '4': '12.46%'})	(2.95, {'4': '39.59%', '3': '28.83%', '2': '18.51%', '1': '13.08%'})	(2.63, {'2': '34.98%', '3': '26.70%', '4': '25.02%', '1': '13.30%'})	(2.66, {'2': '40.49%', '3': '34.95%', '4': '18.41%', '1': '6.14%'})	(2.6, {'3': '32.42%', '4': '26.59%', '1': '25.41%', '2': '15.57%'})	(2.21, {'2': '42.25%', '3': '28.58%', '1': '22.08%', '4': '7.08%'})	(2.05, {'2': '34.42%', '1': '34.37%', '3': '23.36%', '4': '7.85%'})	(2.43, {'2': '30.47%', '3': '29.06%', '1': '22.26%', '4': '18.21%'})								231	GOVERNANCE & POLITICAL SYSTEMS
(2.01, {'1': '39.68%', '3': '28.39%', '2': '25.59%', '4': '6.34%'})	(2.24, {'2': '33.68%', '1': '29.01%', '3': '22.11%', '4': '15.20%'})	(1.93, {'1': '51.27%', '2': '18.72%', '3': '15.84%', '4': '14.17%'})	(1.73, {'1': '51.30%', '2': '31.37%', '3': '10.10%', '4': '7.24%'})	(1.98, {'2': '37.95%', '1': '35.63%', '3': '19.36%', '4': '7.06%'})	(1.92, {'1': '45.31%', '2': '25.90%', '3': '20.58%', '4': '8.21%'})	(1.99, {'2': '36.67%', '1': '34.67%', '3': '23.58%', '4': '5.08%'})	(2.84, {'3': '31.34%', '4': '30.34%', '2': '30.06%', '1': '8.26%'})	(1.95, {'1': '41.06%', '2': '28.78%', '3': '24.11%', '4': '6.05%'})								232	GOVERNANCE & POLITICAL SYSTEMS
(3.29, {'4': '54.28%', '3': '24.94%', '2': '16.51%', '1': '4.28%'})	(3.41, {'4': '59.82%', '3': '25.00%', '2': '11.40%', '1': '3.78%'})	(2.59, {'4': '30.71%', '1': '25.85%', '3': '23.83%', '2': '19.62%'})	(3.06, {'4': '47.79%', '2': '23.60%', '3': '19.37%', '1': '9.24%'})	(2.8, {'3': '35.70%', '2': '30.09%', '4': '26.23%', '1': '7.98%'})	(2.73, {'4': '35.79%', '3': '25.33%', '1': '24.11%', '2': '14.77%'})	(3.03, {'4': '39.33%', '3': '31.58%', '2': '21.92%', '1': '7.17%'})	(2.97, {'3': '34.33%', '4': '33.97%', '2': '26.34%', '1': '5.36%'})	(2.99, {'4': '38.72%', '3': '29.98%', '2': '22.66%', '1': '8.64%'})								233	GOVERNANCE & POLITICAL SYSTEMS
(2.76, {'3': '37.58%', '2': '29.29%', '4': '23.89%', '1': '9.24%'})	(2.12, {'2': '39.16%', '1': '30.67%', '3': '17.90%', '4': '12.27%'})	(2.42, {'1': '29.09%', '3': '24.84%', '2': '23.13%', '4': '22.94%'})	(2.31, {'2': '35.79%', '1': '24.85%', '3': '23.01%', '4': '16.36%'})	(2.4, {'2': '43.60%', '3': '34.73%', '1': '12.80%', '4': '8.87%'})	(2.14, {'1': '43.41%', '3': '20.92%', '4': '18.06%', '2': '17.60%'})	(2.19, {'2': '35.92%', '1': '27.50%', '3': '27.08%', '4': '9.50%'})	(2.07, {'1': '34.31%', '2': '33.73%', '3': '22.73%', '4': '9.22%'})	(2.33, {'2': '32.82%', '3': '29.39%', '1': '24.14%', '4': '13.65%'})								234	GOVERNANCE & POLITICAL SYSTEMS
(2.32, {'2': '36.38%', '3': '31.86%', '1': '21.21%', '4': '10.55%'})	(2.26, {'2': '34.31%', '3': '28.25%', '1': '25.66%', '4': '11.78%'})	(2.05, {'1': '42.58%', '2': '23.09%', '3': '20.72%', '4': '13.61%'})	(1.97, {'1': '38.34%', '2': '35.63%', '3': '16.33%', '4': '9.69%'})	(2.43, {'2': '36.96%', '3': '33.05%', '1': '16.82%', '4': '13.17%'})	(2.04, {'1': '47.91%', '3': '20.41%', '2': '15.88%', '4': '15.79%'})	(2.08, {'2': '38.42%', '1': '29.92%', '3': '25.75%', '4': '5.92%'})	(1.98, {'1': '37.68%', '2': '33.51%', '3': '22.28%', '4': '6.52%'})	(2.48, {'3': '39.25%', '2': '28.95%', '1': '18.29%', '4': '13.50%'})								235	GOVERNANCE & POLITICAL SYSTEMS
(1.37, {'1': '73.82%', '2': '18.41%', '3': '5.00%', '4': '2.77%'})	(1.34, {'1': '76.11%', '2': '16.22%', '3': '4.91%', '4': '2.76%'})	(1.64, {'1': '59.81%', '2': '22.62%', '3': '10.88%', '4': '6.68%'})	(1.53, {'1': '63.93%', '2': '23.33%', '3': '8.38%', '4': '4.36%'})	(1.67, {'1': '54.50%', '2': '28.17%', '3': '13.58%', '4': '3.75%'})	(1.37, {'1': '76.99%', '2': '12.86%', '3': '6.26%', '4': '3.89%'})	(1.56, {'1': '56.75%', '2': '32.67%', '3': '8.08%', '4': '2.50%'})	(1.51, {'1': '56.13%', '2': '37.21%', '3': '6.24%', '4': '0.42%'})	(1.56, {'1': '62.04%', '2': '23.47%', '3': '11.22%', '4': '3.28%'})								236	GOVERNANCE & POLITICAL SYSTEMS
(3.55, {'3': '35.06%', '4': '25.63%', '5': '23.81%', '2': '13.07%', '1': '2.43%'})	(3.1, {'3': '40.21%', '5': '18.34%', '2': '15.16%', '4': '13.70%', '1': '12.60%'})	(3.28, {'4': '26.13%', '3': '22.20%', '5': '22.03%', '2': '16.91%', '1': '12.72%'})	(2.8, {'3': '31.73%', '2': '24.10%', '1': '17.44%', '4': '14.29%', '5': '12.45%'})	(3.35, {'3': '29.06%', '4': '25.29%', '5': '20.52%', '2': '18.84%', '1': '6.28%'})	(3.16, {'3': '32.79%', '4': '22.77%', '5': '17.29%', '1': '14.64%', '2': '12.50%'})	(3.64, {'4': '34.17%', '3': '33.75%', '5': '21.67%', '2': '7.42%', '1': '3.00%'})		(3.1, {'3': '42.54%', '4': '20.07%', '5': '13.04%', '2': '12.18%', '1': '12.18%'})								237	GOVERNANCE & POLITICAL SYSTEMS
(2.94, {'4': '36.58%', '3': '28.34%', '2': '27.70%', '1': '7.38%'})	(2.49, {'2': '34.91%', '3': '25.60%', '4': '21.01%', '1': '18.48%'})	(2.0, {'1': '46.08%', '2': '21.81%', '3': '18.57%', '4': '13.54%'})	(2.44, {'2': '33.36%', '3': '32.42%', '1': '18.81%', '4': '15.41%'})	(2.81, {'4': '33.36%', '3': '28.95%', '2': '23.26%', '1': '14.43%'})	(2.36, {'1': '28.38%', '3': '28.21%', '2': '25.15%', '4': '18.25%'})	(2.37, {'2': '30.33%', '1': '27.33%', '4': '22.17%', '3': '20.17%'})	(2.42, {'2': '39.46%', '3': '29.87%', '1': '16.41%', '4': '14.26%'})	(3.03, {'3': '43.78%', '4': '34.51%', '2': '11.85%', '1': '9.87%'})								238	GOVERNANCE & POLITICAL SYSTEMS
(2.18, {'2': '53.08%', '1': '19.27%', '3': '18.50%', '4': '9.14%'})	(1.96, {'2': '37.18%', '1': '36.16%', '3': '20.96%', '4': '5.70%'})	(2.29, {'2': '31.81%', '1': '28.62%', '3': '21.47%', '4': '18.10%'})	(2.53, {'2': '37.56%', '3': '32.89%', '4': '16.59%', '1': '12.96%'})	(2.23, {'2': '38.90%', '1': '26.10%', '3': '21.10%', '4': '13.90%'})	(2.31, {'2': '33.45%', '3': '27.38%', '1': '24.87%', '4': '14.30%'})	(2.24, {'2': '31.58%', '1': '30.33%', '3': '22.00%', '4': '16.08%'})	(2.45, {'2': '38.32%', '3': '31.98%', '1': '15.52%', '4': '14.17%'})	(2.66, {'3': '30.70%', '4': '26.48%', '2': '24.68%', '1': '18.14%'})								239	GOVERNANCE & POLITICAL SYSTEMS
	(2.73, {'4': '29.80%', '2': '29.06%', '3': '27.16%', '1': '13.99%'})	(2.54, {'4': '26.64%', '3': '25.09%', '1': '24.74%', '2': '23.53%'})	(2.77, {'3': '33.90%', '2': '27.54%', '4': '27.16%', '1': '11.40%'})	(2.15, {'1': '32.91%', '2': '32.48%', '3': '21.34%', '4': '13.27%'})	(2.33, {'2': '29.18%', '1': '28.13%', '3': '24.63%', '4': '18.05%'})	(3.07, {'4': '40.00%', '3': '34.50%', '2': '18.33%', '1': '7.17%'})		(2.87, {'3': '41.57%', '4': '28.61%', '2': '18.24%', '1': '11.58%'})								240	GOVERNANCE & POLITICAL SYSTEMS
(1.44, {'1': '59.72%', '2': '37.81%', '4': '1.38%', '3': '1.09%'})	(1.44, {'1': '60.03%', '2': '36.92%', '3': '2.24%', '4': '0.81%'})	(2.27, {'1': '34.10%', '2': '25.19%', '4': '20.39%', '3': '20.31%'})	(2.02, {'2': '44.69%', '1': '30.51%', '3': '16.63%', '4': '8.17%'})	(1.94, {'2': '39.39%', '1': '37.36%', '3': '14.96%', '4': '8.28%'})	(1.58, {'1': '54.57%', '2': '36.64%', '3': '4.87%', '4': '3.92%'})	(1.65, {'1': '50.42%', '2': '37.33%', '3': '9.50%', '4': '2.75%'})	(1.78, {'1': '43.07%', '2': '39.51%', '3': '14.03%', '4': '3.39%'})	(1.95, {'1': '47.45%', '2': '25.85%', '4': '15.73%', '3': '10.97%'})								241	GOVERNANCE & POLITICAL SYSTEMS
(2.68, {'2': '33.76%', '3': '32.15%', '4': '23.19%', '1': '10.90%'})	(1.9, {'1': '42.59%', '2': '36.97%', '4': '11.85%', '3': '8.60%'})	(2.59, {'3': '27.96%', '4': '26.99%', '1': '23.01%', '2': '22.04%'})	(2.33, {'2': '41.23%', '3': '29.24%', '1': '18.42%', '4': '11.11%'})	(2.94, {'4': '36.21%', '3': '30.45%', '2': '24.26%', '1': '9.08%'})	(2.01, {'1': '40.42%', '2': '30.31%', '3': '17.51%', '4': '11.76%'})	(2.48, {'2': '34.00%', '3': '29.67%', '1': '18.17%', '4': '18.17%'})	(2.89, {'3': '36.30%', '4': '29.71%', '2': '26.99%', '1': '7.00%'})	(2.96, {'3': '43.39%', '4': '30.16%', '2': '19.01%', '1': '7.43%'})								242	GOVERNANCE & POLITICAL SYSTEMS
					(5.75, {'5': '31.19%', '6': '20.40%', '10': '14.97%', '2': '11.62%', '7': '4.60%', '8': '4.35%', '3': '3.85%', '9': '3.34%', '4': '3.09%', '1': '2.59%'})	(5.79, {'6': '21.92%', '5': '20.17%', '7': '10.92%', '4': '9.58%', '10': '9.50%', '8': '8.75%', '1': '5.58%', '3': '5.33%', '9': '4.17%', '2': '4.08%'})	(6.29, {'5': '19.76%', '10': '15.62%', '8': '13.90%', '7': '11.67%', '6': '10.55%', '4': '7.86%', '9': '6.60%', '1': '5.76%', '3': '4.88%', '2': '3.39%'})	(6.03, {'5': '25.00%', '10': '12.25%', '6': '12.04%', '7': '11.94%', '8': '11.54%', '4': '9.01%', '3': '7.89%', '9': '4.25%', '2': '3.34%', '1': '2.73%'})								243	GOVERNANCE & POLITICAL SYSTEMS
(8.03, {'10': '44.59%', '8': '12.05%', '9': '10.53%', '7': '9.68%', '6': '7.59%', '5': '5.41%', '1': '3.04%', '3': '2.94%', '4': '2.66%', '2': '1.52%'})	(7.83, {'10': '48.71%', '8': '12.38%', '5': '12.31%', '7': '7.37%', '1': '6.77%', '9': '4.74%', '6': '3.32%', '4': '2.17%', '2': '1.22%', '3': '1.01%'})	(7.25, {'10': '27.83%', '9': '14.58%', '8': '13.33%', '6': '10.50%', '7': '9.42%', '5': '8.58%', '1': '5.33%', '2': '3.50%', '3': '3.50%', '4': '3.42%'})	(7.19, {'10': '38.78%', '1': '10.67%', '5': '9.99%', '8': '9.23%', '9': '8.89%', '6': '6.94%', '7': '6.94%', '4': '3.05%', '3': '2.79%', '2': '2.71%'})	(7.06, {'8': '20.23%', '10': '17.56%', '9': '14.80%', '7': '13.21%', '6': '9.28%', '5': '8.53%', '4': '5.02%', '2': '4.68%', '3': '4.26%', '1': '2.42%'})	(6.91, {'10': '36.23%', '1': '13.26%', '5': '12.14%', '9': '9.62%', '8': '8.12%', '7': '6.72%', '6': '4.39%', '4': '3.45%', '3': '3.45%', '2': '2.61%'})	(7.32, {'10': '41.83%', '1': '11.83%', '9': '10.08%', '8': '8.92%', '6': '6.83%', '7': '6.42%', '5': '5.67%', '3': '4.67%', '4': '2.08%', '2': '1.67%'})	(5.84, {'6': '14.55%', '1': '14.38%', '5': '14.17%', '10': '13.66%', '7': '13.23%', '8': '10.92%', '4': '7.11%', '9': '5.39%', '3': '4.41%', '2': '2.18%'})	(7.53, {'10': '38.26%', '9': '12.67%', '8': '10.15%', '7': '9.14%', '5': '7.21%', '1': '6.96%', '6': '6.80%', '3': '4.61%', '4': '2.60%', '2': '1.59%'})								244	GOVERNANCE & POLITICAL SYSTEMS
(5.78, {'10': '17.05%', '5': '15.40%', '1': '12.54%', '6': '12.10%', '7': '11.44%', '8': '8.03%', '3': '7.37%', '4': '7.04%', '9': '4.62%', '2': '4.40%'})	(5.36, {'5': '23.59%', '1': '17.02%', '10': '13.97%', '8': '9.42%', '7': '6.78%', '4': '6.78%', '2': '6.31%', '9': '5.76%', '6': '5.29%', '3': '5.08%'})	(5.4, {'5': '15.08%', '1': '14.50%', '6': '13.33%', '10': '10.92%', '8': '9.92%', '3': '9.00%', '7': '8.25%', '4': '6.75%', '9': '6.50%', '2': '5.75%'})	(6.04, {'10': '21.65%', '5': '14.91%', '1': '14.65%', '8': '10.60%', '6': '9.07%', '7': '8.72%', '9': '6.29%', '2': '5.30%', '4': '4.58%', '3': '4.22%'})	(4.43, {'1': '19.56%', '3': '12.59%', '2': '12.24%', '5': '11.73%', '4': '9.86%', '7': '9.01%', '6': '7.82%', '8': '7.14%', '10': '5.61%', '9': '4.42%'})	(6.72, {'10': '32.68%', '5': '12.29%', '1': '11.64%', '8': '10.34%', '9': '8.19%', '7': '6.15%', '4': '5.49%', '6': '5.12%', '2': '4.28%', '3': '3.82%'})	(5.32, {'1': '18.75%', '10': '15.08%', '5': '13.00%', '6': '11.83%', '3': '8.83%', '7': '8.50%', '8': '7.33%', '4': '7.33%', '9': '4.75%', '2': '4.58%'})	(4.4, {'1': '27.12%', '5': '12.93%', '6': '12.15%', '7': '9.04%', '3': '8.91%', '4': '8.17%', '8': '7.87%', '2': '5.71%', '10': '5.02%', '9': '3.07%'})	(3.95, {'1': '29.93%', '3': '14.24%', '5': '10.72%', '2': '10.55%', '4': '7.72%', '10': '6.95%', '8': '5.92%', '7': '5.40%', '6': '4.89%', '9': '3.69%'})								245	GOVERNANCE & POLITICAL SYSTEMS
(8.76, {'10': '55.81%', '9': '12.55%', '8': '10.86%', '7': '9.18%', '6': '4.12%', '5': '3.09%', '4': '1.78%', '3': '1.69%', '1': '0.56%', '2': '0.37%'})	(8.0, {'10': '48.81%', '5': '14.11%', '8': '12.34%', '7': '6.00%', '6': '5.79%', '9': '5.32%', '1': '3.14%', '4': '2.04%', '3': '1.70%', '2': '0.75%'})	(8.02, {'10': '33.08%', '9': '20.42%', '8': '14.08%', '6': '11.25%', '7': '8.50%', '5': '6.75%', '1': '2.42%', '4': '1.92%', '3': '0.92%', '2': '0.67%'})	(7.79, {'10': '43.57%', '8': '11.56%', '9': '9.40%', '5': '9.32%', '7': '7.85%', '6': '6.64%', '1': '5.78%', '3': '2.50%', '4': '2.24%', '2': '1.12%'})	(7.48, {'10': '25.58%', '9': '17.33%', '8': '16.42%', '7': '13.42%', '6': '7.42%', '5': '5.00%', '2': '4.58%', '3': '4.58%', '4': '4.25%', '1': '1.42%'})	(8.4, {'10': '57.44%', '9': '12.17%', '8': '7.88%', '5': '5.25%', '1': '4.90%', '7': '3.42%', '6': '3.42%', '3': '2.45%', '4': '1.93%', '2': '1.14%'})	(7.66, {'10': '39.17%', '8': '13.83%', '6': '11.42%', '9': '9.50%', '7': '7.75%', '1': '6.08%', '5': '5.42%', '4': '3.25%', '3': '2.42%', '2': '1.17%'})	(7.53, {'10': '35.42%', '6': '11.25%', '8': '11.04%', '7': '10.40%', '5': '10.36%', '9': '9.21%', '4': '5.46%', '3': '2.98%', '1': '2.81%', '2': '1.07%'})	(7.59, {'10': '39.81%', '7': '10.49%', '8': '10.23%', '9': '9.55%', '6': '8.87%', '5': '5.88%', '3': '4.77%', '1': '4.52%', '4': '3.15%', '2': '2.73%'})								246	GOVERNANCE & POLITICAL SYSTEMS
(6.16, {'10': '18.90%', '8': '15.76%', '1': '11.40%', '5': '11.40%', '7': '10.16%', '6': '8.64%', '9': '6.36%', '3': '6.36%', '4': '5.79%', '2': '5.22%'})	(7.76, {'10': '43.92%', '8': '13.85%', '5': '13.04%', '7': '8.31%', '9': '6.01%', '1': '5.54%', '6': '4.59%', '4': '2.36%', '3': '1.42%', '2': '0.95%'})	(7.72, {'10': '31.58%', '9': '18.25%', '8': '13.58%', '6': '9.83%', '7': '8.33%', '5': '8.25%', '1': '3.83%', '4': '3.00%', '3': '1.83%', '2': '1.50%'})	(6.45, {'10': '29.64%', '1': '14.23%', '5': '11.94%', '7': '8.89%', '9': '7.96%', '8': '7.45%', '6': '6.44%', '4': '5.67%', '3': '3.90%', '2': '3.90%'})	(6.63, {'8': '19.25%', '7': '17.17%', '10': '12.67%', '9': '11.17%', '6': '10.42%', '5': '9.17%', '2': '6.08%', '4': '5.50%', '3': '5.25%', '1': '3.33%'})	(7.48, {'10': '45.72%', '5': '9.11%', '9': '8.36%', '1': '7.90%', '8': '7.71%', '6': '5.39%', '4': '5.20%', '7': '4.55%', '3': '3.53%', '2': '2.51%'})	(7.89, {'10': '39.83%', '9': '15.25%', '8': '12.67%', '6': '9.17%', '7': '8.33%', '1': '6.58%', '5': '3.25%', '4': '2.33%', '3': '1.75%', '2': '0.83%'})	(7.22, {'10': '24.93%', '7': '14.90%', '8': '13.36%', '5': '12.68%', '6': '11.78%', '9': '10.19%', '4': '5.44%', '3': '3.00%', '1': '2.57%', '2': '1.16%'})	(7.54, {'10': '37.89%', '8': '11.23%', '9': '10.23%', '7': '9.97%', '6': '9.97%', '5': '5.95%', '1': '5.20%', '3': '4.61%', '2': '2.51%', '4': '2.43%'})								247	GOVERNANCE & POLITICAL SYSTEMS
	(4.32, {'1': '28.08%', '5': '25.36%', '8': '7.16%', '6': '7.09%', '2': '6.54%', '4': '6.00%', '10': '5.86%', '3': '5.73%', '7': '4.43%', '9': '3.75%'})	(6.82, {'10': '21.33%', '8': '13.75%', '9': '13.75%', '6': '10.67%', '7': '10.17%', '5': '10.08%', '1': '7.33%', '4': '5.50%', '3': '5.08%', '2': '2.33%'})	(5.49, {'1': '22.02%', '10': '18.38%', '5': '12.92%', '7': '8.83%', '6': '8.46%', '8': '8.19%', '4': '6.19%', '9': '5.73%', '3': '5.46%', '2': '3.82%'})	(6.04, {'7': '14.68%', '5': '13.08%', '8': '12.41%', '10': '11.48%', '6': '11.48%', '4': '8.61%', '9': '8.44%', '3': '7.76%', '2': '6.75%', '1': '5.32%'})	(7.33, {'10': '43.22%', '5': '10.81%', '1': '9.00%', '9': '8.44%', '8': '7.77%', '7': '5.78%', '6': '4.27%', '4': '4.17%', '3': '3.41%', '2': '3.13%'})	(5.02, {'1': '20.08%', '5': '16.33%', '10': '12.67%', '2': '9.58%', '6': '9.50%', '8': '8.92%', '7': '7.92%', '4': '6.50%', '3': '5.33%', '9': '3.17%'})	(7.26, {'10': '28.22%', '6': '13.06%', '8': '12.08%', '7': '11.69%', '5': '11.09%', '9': '10.36%', '4': '5.61%', '1': '3.38%', '3': '3.34%', '2': '1.16%'})	(5.56, {'1': '18.62%', '10': '18.53%', '5': '12.41%', '6': '10.26%', '7': '7.50%', '8': '7.33%', '3': '7.24%', '9': '6.72%', '4': '5.95%', '2': '5.43%'})								248	GOVERNANCE & POLITICAL SYSTEMS
(7.99, {'10': '42.56%', '8': '11.78%', '6': '10.18%', '7': '9.95%', '5': '9.27%', '9': '8.70%', '4': '3.55%', '3': '2.40%', '1': '1.14%', '2': '0.46%'})	(8.36, {'10': '53.88%', '8': '11.29%', '5': '9.66%', '9': '8.03%', '7': '5.85%', '6': '5.65%', '1': '2.86%', '4': '1.16%', '2': '0.82%', '3': '0.82%'})	(7.39, {'10': '22.75%', '8': '16.67%', '7': '13.92%', '6': '13.58%', '9': '13.42%', '5': '10.75%', '4': '3.67%', '1': '2.25%', '3': '1.75%', '2': '1.25%'})	(6.91, {'10': '26.17%', '5': '14.46%', '7': '12.44%', '8': '12.35%', '6': '11.34%', '9': '7.41%', '1': '7.23%', '4': '4.67%', '3': '2.38%', '2': '1.56%'})	(6.75, {'8': '16.00%', '10': '15.67%', '7': '13.75%', '9': '13.33%', '6': '11.50%', '5': '10.58%', '3': '6.08%', '4': '5.25%', '2': '5.08%', '1': '2.75%'})	(7.37, {'10': '39.36%', '5': '11.91%', '8': '10.91%', '9': '8.91%', '1': '6.91%', '7': '6.64%', '6': '5.36%', '3': '4.00%', '4': '3.55%', '2': '2.45%'})	(7.51, {'10': '36.33%', '8': '17.17%', '6': '9.75%', '7': '8.67%', '9': '7.50%', '5': '7.33%', '1': '6.17%', '3': '2.58%', '2': '2.50%', '4': '2.00%'})	(6.83, {'10': '20.81%', '7': '14.25%', '5': '14.03%', '6': '13.99%', '8': '12.13%', '9': '9.37%', '4': '5.74%', '1': '5.22%', '3': '2.81%', '2': '1.64%'})	(7.52, {'10': '34.02%', '8': '12.92%', '7': '11.97%', '9': '11.28%', '5': '7.84%', '6': '7.75%', '3': '4.91%', '4': '3.88%', '1': '3.27%', '2': '2.15%'})								249	GOVERNANCE & POLITICAL SYSTEMS
(7.16, {'10': '28.64%', '8': '13.99%', '7': '13.62%', '6': '12.50%', '5': '11.85%', '9': '6.25%', '1': '5.32%', '4': '4.01%', '3': '2.61%', '2': '1.21%'})	(7.28, {'10': '43.81%', '5': '12.52%', '8': '9.69%', '7': '7.47%', '1': '7.07%', '4': '5.05%', '6': '4.24%', '2': '3.84%', '3': '3.36%', '9': '2.96%'})	(7.3, {'10': '25.67%', '9': '16.08%', '8': '13.00%', '6': '11.83%', '7': '10.42%', '5': '9.42%', '1': '4.33%', '4': '3.83%', '3': '3.25%', '2': '2.17%'})	(6.09, {'10': '22.02%', '1': '15.48%', '6': '11.65%', '5': '11.14%', '7': '10.46%', '8': '9.01%', '9': '6.72%', '4': '5.10%', '3': '4.25%', '2': '4.17%'})	(6.11, {'7': '15.00%', '8': '14.67%', '6': '12.08%', '5': '10.67%', '10': '10.50%', '9': '9.92%', '3': '7.42%', '2': '6.75%', '4': '6.58%', '1': '6.42%'})	(7.5, {'10': '45.14%', '5': '11.47%', '8': '9.16%', '1': '7.68%', '9': '7.49%', '7': '6.11%', '6': '3.61%', '4': '3.33%', '2': '3.05%', '3': '2.96%'})	(7.38, {'10': '30.67%', '8': '19.50%', '9': '9.42%', '7': '9.25%', '6': '8.92%', '5': '7.50%', '1': '5.75%', '4': '4.00%', '3': '3.33%', '2': '1.67%'})	(5.01, {'1': '20.15%', '5': '14.32%', '6': '12.30%', '7': '10.44%', '8': '9.45%', '4': '8.11%', '3': '7.98%', '10': '7.46%', '9': '5.18%', '2': '4.62%'})	(6.22, {'10': '20.55%', '1': '13.17%', '7': '11.74%', '6': '11.41%', '5': '10.40%', '8': '10.32%', '9': '8.22%', '4': '5.70%', '3': '4.45%', '2': '4.03%'})								250	GOVERNANCE & POLITICAL SYSTEMS
(6.37, {'5': '18.72%', '10': '18.22%', '6': '12.61%', '8': '12.41%', '7': '10.81%', '3': '6.81%', '9': '6.21%', '1': '5.61%', '4': '5.51%', '2': '3.10%'})	(6.21, {'5': '25.14%', '10': '23.00%', '8': '13.02%', '1': '11.64%', '7': '8.13%', '6': '5.17%', '2': '4.20%', '4': '3.58%', '9': '3.37%', '3': '2.75%'})	(6.43, {'10': '16.58%', '5': '15.25%', '6': '13.42%', '9': '11.25%', '8': '11.25%', '7': '10.50%', '4': '6.50%', '1': '6.25%', '3': '5.83%', '2': '3.17%'})	(7.4, {'10': '35.02%', '5': '13.05%', '7': '11.95%', '8': '11.70%', '6': '8.59%', '9': '7.58%', '1': '5.30%', '4': '3.54%', '3': '1.77%', '2': '1.52%'})	(4.98, {'5': '20.51%', '4': '12.31%', '6': '11.88%', '7': '10.94%', '3': '10.60%', '8': '9.32%', '1': '8.89%', '2': '8.55%', '9': '4.44%', '10': '2.56%'})	(7.86, {'10': '45.97%', '9': '11.15%', '8': '10.34%', '5': '9.97%', '7': '6.17%', '1': '4.99%', '6': '3.45%', '3': '3.08%', '4': '2.99%', '2': '1.90%'})	(6.17, {'10': '24.42%', '6': '14.25%', '1': '12.17%', '8': '9.33%', '7': '9.00%', '5': '7.58%', '4': '7.08%', '3': '5.92%', '2': '5.58%', '9': '4.67%'})	(7.76, {'10': '37.82%', '8': '11.28%', '6': '10.73%', '5': '10.26%', '9': '10.26%', '7': '10.13%', '4': '4.15%', '3': '2.65%', '1': '1.79%', '2': '0.94%'})	(5.88, {'10': '17.16%', '5': '16.15%', '7': '10.09%', '6': '9.67%', '1': '9.67%', '8': '9.50%', '3': '9.00%', '4': '8.83%', '9': '5.63%', '2': '4.29%'})								251	GOVERNANCE & POLITICAL SYSTEMS
(7.22, {'10': '30.73%', '5': '14.85%', '6': '12.97%', '7': '11.65%', '8': '10.62%', '9': '6.30%', '4': '5.92%', '3': '3.67%', '2': '1.88%', '1': '1.41%'})	(7.7, {'10': '41.69%', '8': '15.94%', '5': '12.10%', '7': '8.14%', '9': '6.52%', '1': '4.30%', '6': '3.50%', '4': '2.76%', '3': '2.69%', '2': '2.35%'})	(7.31, {'10': '28.42%', '9': '13.92%', '5': '12.58%', '6': '11.42%', '8': '11.00%', '7': '9.83%', '4': '3.75%', '1': '3.75%', '3': '3.67%', '2': '1.67%'})	(7.32, {'10': '34.45%', '7': '11.99%', '5': '11.15%', '8': '9.30%', '9': '9.30%', '6': '8.97%', '1': '6.20%', '4': '4.95%', '3': '2.35%', '2': '1.34%'})	(7.26, {'10': '23.00%', '8': '17.17%', '7': '13.50%', '9': '12.83%', '6': '9.75%', '5': '8.92%', '4': '5.92%', '3': '4.83%', '2': '3.42%', '1': '0.67%'})	(7.3, {'10': '40.04%', '5': '14.35%', '9': '9.25%', '8': '8.88%', '1': '8.03%', '7': '5.76%', '6': '4.34%', '4': '3.97%', '2': '2.74%', '3': '2.64%'})	(7.74, {'10': '42.25%', '8': '11.58%', '7': '10.17%', '9': '10.08%', '6': '6.33%', '1': '5.83%', '5': '5.25%', '4': '3.25%', '3': '3.17%', '2': '2.08%'})	(7.89, {'10': '35.83%', '8': '15.27%', '7': '11.68%', '6': '11.38%', '5': '10.11%', '9': '9.98%', '4': '3.26%', '3': '1.18%', '1': '0.89%', '2': '0.42%'})	(6.3, {'10': '23.25%', '5': '13.75%', '7': '9.58%', '1': '9.58%', '8': '9.33%', '6': '9.17%', '9': '7.33%', '4': '7.17%', '3': '6.00%', '2': '4.83%'})								252	GOVERNANCE & POLITICAL SYSTEMS
(9.13, {'10': '63.10%', '8': '12.62%', '9': '10.10%', '7': '8.70%', '6': '3.31%', '5': '1.57%', '3': '0.35%', '4': '0.17%', '1': '0.09%'})	(8.81, {'10': '64.17%', '8': '11.88%', '5': '6.82%', '7': '5.80%', '9': '5.20%', '6': '2.90%', '1': '2.16%', '3': '0.40%', '4': '0.34%', '2': '0.34%'})	(7.34, {'10': '26.17%', '9': '14.58%', '8': '13.42%', '7': '11.75%', '5': '11.33%', '6': '10.67%', '4': '4.17%', '1': '4.08%', '3': '2.42%', '2': '1.42%'})	(8.18, {'10': '48.81%', '8': '10.58%', '9': '8.70%', '7': '8.45%', '5': '8.02%', '6': '7.68%', '4': '3.41%', '1': '2.30%', '3': '1.37%', '2': '0.68%'})	(6.95, {'10': '23.97%', '9': '16.40%', '8': '14.21%', '3': '8.24%', '7': '7.65%', '4': '7.40%', '2': '7.15%', '6': '6.39%', '5': '6.14%', '1': '2.44%'})	(8.58, {'10': '61.12%', '9': '9.20%', '8': '6.86%', '5': '6.19%', '6': '6.10%', '7': '3.43%', '2': '2.84%', '4': '1.59%', '1': '1.42%', '3': '1.25%'})	(8.7, {'10': '60.25%', '9': '11.25%', '8': '7.92%', '6': '6.33%', '7': '4.17%', '5': '3.75%', '4': '2.25%', '3': '1.75%', '1': '1.67%', '2': '0.67%'})	(6.27, {'8': '17.38%', '7': '16.40%', '5': '14.53%', '6': '13.63%', '4': '9.08%', '10': '8.48%', '9': '7.58%', '3': '6.65%', '1': '3.62%', '2': '2.64%'})	(7.87, {'10': '43.21%', '9': '12.49%', '8': '9.11%', '7': '8.61%', '6': '6.84%', '5': '6.24%', '4': '4.89%', '3': '3.80%', '1': '3.63%', '2': '1.18%'})								253	GOVERNANCE & POLITICAL SYSTEMS
(1.58, {'1': '48.07%', '2': '46.98%', '3': '3.94%', '4': '1.01%'})	(1.22, {'1': '84.53%', '2': '10.81%', '3': '2.84%', '4': '1.82%'})	(1.54, {'1': '66.64%', '2': '18.86%', '3': '8.55%', '4': '5.95%'})	(1.12, {'1': '91.46%', '2': '6.11%', '3': '1.76%', '4': '0.67%'})	(1.58, {'1': '53.92%', '2': '36.42%', '3': '7.17%', '4': '2.50%'})	(1.2, {'1': '82.73%', '2': '15.42%', '3': '1.17%', '4': '0.67%'})	(1.68, {'2': '48.25%', '1': '42.33%', '3': '8.25%', '4': '1.17%'})	(1.44, {'1': '64.42%', '2': '28.10%', '3': '6.47%', '4': '1.01%'})	(1.5, {'1': '62.97%', '2': '26.69%', '3': '7.92%', '4': '2.42%'})								254	GOVERNANCE & POLITICAL SYSTEMS
(1.16, {'1': '86.67%', '2': '10.92%', '3': '1.92%', '4': '0.50%'})	(1.34, {'1': '73.56%', '2': '20.35%', '3': '4.28%', '4': '1.81%'})	(1.28, {'1': '81.40%', '2': '11.09%', '3': '6.01%', '4': '1.50%'})	(1.1, {'1': '91.74%', '2': '6.76%', '3': '0.83%', '4': '0.67%'})	(1.28, {'1': '79.50%', '2': '14.50%', '3': '4.25%', '4': '1.75%'})	(1.12, {'1': '90.34%', '2': '7.39%', '3': '1.93%', '4': '0.34%'})	(1.36, {'1': '70.83%', '2': '23.17%', '3': '5.08%', '4': '0.92%'})	(1.61, {'1': '48.91%', '2': '42.22%', '3': '7.32%', '4': '1.55%'})	(1.27, {'1': '79.32%', '2': '15.12%', '3': '4.98%', '4': '0.58%'})								255	GOVERNANCE & POLITICAL SYSTEMS
(1.2, {'1': '83.14%', '2': '14.61%', '3': '1.84%', '4': '0.42%'})	(1.56, {'1': '59.41%', '2': '28.60%', '3': '8.10%', '4': '3.88%'})	(1.38, {'1': '74.71%', '2': '15.69%', '3': '6.68%', '4': '2.92%'})	(1.12, {'1': '90.31%', '2': '8.02%', '3': '0.92%', '4': '0.75%'})	(1.34, {'1': '75.42%', '2': '17.67%', '3': '4.67%', '4': '2.25%'})	(1.19, {'1': '84.38%', '2': '12.59%', '3': '2.52%', '4': '0.50%'})	(1.54, {'1': '61.17%', '2': '25.83%', '3': '10.50%', '4': '2.50%'})	(1.86, {'2': '43.46%', '1': '36.86%', '3': '16.04%', '4': '3.64%'})	(1.26, {'1': '79.24%', '2': '16.03%', '3': '4.07%', '4': '0.66%'})								256	GOVERNANCE & POLITICAL SYSTEMS
(1.11, {'1': '91.38%', '2': '7.03%', '3': '1.00%', '4': '0.59%'})	(1.23, {'1': '82.15%', '2': '13.89%', '3': '2.68%', '4': '1.28%'})	(1.44, {'1': '76.36%', '2': '9.44%', '3': '8.02%', '4': '6.18%'})	(1.07, {'1': '94.99%', '2': '3.84%', '3': '0.75%', '4': '0.42%'})	(1.3, {'1': '79.67%', '2': '13.50%', '3': '4.42%', '4': '2.42%'})	(1.07, {'1': '94.71%', '2': '3.78%', '3': '1.17%', '4': '0.34%'})	(1.53, {'1': '67.25%', '2': '17.50%', '3': '10.17%', '4': '5.08%'})	(1.76, {'2': '42.79%', '1': '41.86%', '3': '13.30%', '4': '2.06%'})	(1.34, {'1': '74.31%', '2': '18.29%', '3': '6.82%', '4': '0.58%'})								257	GOVERNANCE & POLITICAL SYSTEMS
(1.73, {'1': '48.67%', '2': '34.42%', '3': '11.76%', '4': '5.15%'})	(2.48, {'2': '33.90%', '4': '25.34%', '1': '21.85%', '3': '18.90%'})	(2.16, {'1': '41.56%', '3': '20.99%', '2': '19.40%', '4': '18.05%'})	(1.31, {'1': '78.22%', '2': '15.58%', '3': '3.35%', '4': '2.85%'})	(2.24, {'1': '33.42%', '2': '28.83%', '4': '19.25%', '3': '18.50%'})	(1.75, {'1': '52.46%', '2': '27.76%', '3': '12.14%', '4': '7.64%'})	(1.79, {'1': '50.92%', '2': '26.42%', '3': '15.08%', '4': '7.58%'})	(2.83, {'3': '41.26%', '2': '27.65%', '4': '24.12%', '1': '6.98%'})	(1.57, {'1': '60.27%', '2': '24.62%', '3': '12.69%', '4': '2.42%'})								258	GOVERNANCE & POLITICAL SYSTEMS
(2.13, {'1': '35.46%', '2': '28.21%', '3': '24.63%', '4': '11.70%'})	(1.96, {'2': '40.04%', '1': '36.03%', '3': '15.36%', '4': '8.57%'})	(2.15, {'1': '38.21%', '2': '24.01%', '3': '21.98%', '4': '15.81%'})	(1.54, {'1': '63.67%', '2': '23.41%', '3': '8.22%', '4': '4.70%'})	(2.2, {'2': '35.97%', '1': '29.91%', '3': '18.45%', '4': '15.67%'})	(1.89, {'1': '44.01%', '2': '31.34%', '3': '16.10%', '4': '8.56%'})	(1.81, {'1': '55.00%', '2': '19.67%', '3': '15.08%', '4': '10.25%'})	(2.77, {'3': '39.23%', '2': '31.12%', '4': '22.37%', '1': '7.28%'})	(1.61, {'1': '60.40%', '2': '22.06%', '3': '13.70%', '4': '3.84%'})								259	GOVERNANCE & POLITICAL SYSTEMS
		(3.15, {'4': '48.65%', '3': '26.52%', '2': '16.13%', '1': '8.70%'})	(2.66, {'4': '28.28%', '2': '27.59%', '3': '26.98%', '1': '17.16%'})	(2.79, {'3': '36.86%', '4': '28.13%', '2': '20.91%', '1': '14.11%'})												260	GOVERNANCE & POLITICAL SYSTEMS
(1.35, {'1': '70.70%', '2': '23.54%', '3': '5.41%', '4': '0.34%'})		(1.35, {'1': '73.10%', '2': '20.07%', '3': '5.40%', '4': '1.43%'})	(1.32, {'1': '77.35%', '2': '15.47%', '3': '5.24%', '4': '1.94%'})	(1.39, {'1': '70.23%', '2': '21.15%', '3': '8.36%', '4': '0.25%'})												261	GOVERNANCE & POLITICAL SYSTEMS
(2.58, {'2': '46.23%', '3': '31.55%', '4': '16.21%', '1': '6.01%'})		(2.6, {'2': '28.81%', '3': '28.63%', '4': '24.72%', '1': '17.84%'})	(2.91, {'3': '35.20%', '4': '32.31%', '2': '24.08%', '1': '8.41%'})	(2.78, {'3': '39.01%', '2': '31.69%', '4': '22.91%', '1': '6.39%'})												262	GOVERNANCE & POLITICAL SYSTEMS
(1.72, {'1': '44.09%', '2': '42.21%', '3': '11.16%', '4': '2.53%'})		(1.89, {'2': '40.83%', '1': '39.48%', '3': '11.07%', '4': '8.62%'})	(1.65, {'1': '50.44%', '2': '37.35%', '3': '8.81%', '4': '3.40%'})	(2.02, {'2': '46.19%', '1': '29.44%', '3': '17.34%', '4': '7.02%'})												263	GOVERNANCE & POLITICAL SYSTEMS
(1.62, {'1': '50.13%', '2': '37.91%', '3': '11.96%'})		(1.61, {'1': '59.16%', '2': '26.33%', '3': '8.44%', '4': '6.08%'})	(1.89, {'1': '40.22%', '2': '34.23%', '3': '22.14%', '4': '3.41%'})	(1.72, {'1': '44.21%', '2': '42.11%', '3': '11.07%', '4': '2.60%'})												264	ECONOMIC DIMENSIONS
(1.61, {'1': '50.50%', '2': '38.66%', '3': '10.66%', '4': '0.18%'})		(1.65, {'1': '52.52%', '2': '34.30%', '3': '9.24%', '4': '3.93%'})	(1.8, {'1': '42.94%', '2': '36.62%', '3': '17.47%', '4': '2.97%'})	(1.66, {'1': '48.02%', '2': '40.02%', '3': '10.11%', '4': '1.85%'})												265	ECONOMIC DIMENSIONS
(1.36, {'1': '66.96%', '2': '30.34%', '3': '2.53%', '4': '0.17%'})		(1.75, {'1': '49.32%', '2': '31.05%', '3': '15.40%', '4': '4.23%'})	(1.77, {'1': '46.41%', '2': '32.61%', '3': '18.26%', '4': '2.72%'})	(1.69, {'1': '47.90%', '2': '38.05%', '3': '11.20%', '4': '2.86%'})												266	ECONOMIC DIMENSIONS
(1.98, {'1': '36.20%', '2': '31.38%', '3': '31.03%', '4': '1.40%'})		(1.79, {'1': '47.44%', '2': '31.48%', '3': '16.04%', '4': '5.03%'})	(2.29, {'3': '41.85%', '2': '26.25%', '1': '25.45%', '4': '6.45%'})	(1.72, {'1': '45.29%', '2': '40.42%', '3': '11.76%', '4': '2.52%'})												267	GOVERNANCE & POLITICAL SYSTEMS
(2.68, {'3': '45.60%', '4': '20.80%', '1': '19.58%', '2': '14.01%'})		(2.48, {'3': '37.09%', '1': '25.40%', '2': '19.22%', '4': '18.29%'})	(3.19, {'4': '44.27%', '3': '38.58%', '2': '8.80%', '1': '8.36%'})	(2.18, {'2': '32.80%', '3': '32.30%', '1': '27.92%', '4': '6.98%'})												268	GOVERNANCE & POLITICAL SYSTEMS
(2.0, {'2': '42.89%', '1': '29.45%', '3': '26.19%', '4': '1.48%'})		(2.12, {'2': '39.71%', '1': '27.57%', '3': '25.38%', '4': '7.34%'})	(2.81, {'3': '53.23%', '2': '21.26%', '4': '17.71%', '1': '7.79%'})	(2.08, {'2': '37.75%', '1': '29.19%', '3': '28.69%', '4': '4.36%'})												269	GOVERNANCE & POLITICAL SYSTEMS
(1.84, {'2': '42.40%', '1': '37.18%', '3': '19.32%', '4': '1.10%'})		(1.94, {'2': '45.26%', '1': '32.40%', '3': '17.94%', '4': '4.40%'})	(2.31, {'2': '37.34%', '3': '31.38%', '1': '20.86%', '4': '10.43%'})	(1.75, {'1': '44.36%', '2': '39.10%', '3': '13.62%', '4': '2.92%'})												270	GOVERNANCE & POLITICAL SYSTEMS
(1.96, {'2': '38.68%', '1': '33.42%', '3': '26.23%', '4': '1.67%'})		(2.02, {'2': '39.31%', '1': '32.44%', '3': '22.13%', '4': '6.12%'})	(2.86, {'3': '55.15%', '4': '18.87%', '2': '18.87%', '1': '7.10%'})	(2.38, {'3': '38.37%', '2': '28.88%', '1': '22.00%', '4': '10.75%'})												271	INDIVIDUAL WELLBEING & DEVELOPMENT
(1.88, {'1': '38.64%', '2': '35.97%', '3': '23.84%', '4': '1.55%'})		(1.95, {'2': '40.46%', '1': '34.97%', '3': '19.26%', '4': '5.32%'})	(2.83, {'3': '56.04%', '2': '20.29%', '4': '16.84%', '1': '6.82%'})	(1.82, {'2': '45.67%', '1': '37.09%', '3': '15.56%', '4': '1.68%'})												272	INDIVIDUAL WELLBEING & DEVELOPMENT
(1.95, {'2': '42.94%', '1': '32.02%', '3': '23.45%', '4': '1.60%'})		(1.87, {'1': '39.71%', '2': '38.27%', '3': '17.19%', '4': '4.83%'})	(2.5, {'3': '41.65%', '2': '33.03%', '1': '14.07%', '4': '11.25%'})	(1.7, {'2': '45.20%', '1': '42.85%', '3': '10.69%', '4': '1.26%'})												273	GOVERNANCE & POLITICAL SYSTEMS
(1.73, {'2': '49.67%', '1': '39.46%', '3': '9.75%', '4': '1.12%'})		(1.92, {'2': '39.71%', '1': '37.07%', '3': '17.18%', '4': '6.04%'})	(2.5, {'3': '45.44%', '2': '32.52%', '1': '13.10%', '4': '8.94%'})	(2.0, {'2': '39.66%', '1': '31.85%', '3': '25.38%', '4': '3.11%'})												274	GOVERNANCE & POLITICAL SYSTEMS
(2.01, {'2': '36.95%', '1': '32.24%', '3': '28.85%', '4': '1.96%'})		(1.93, {'1': '38.31%', '2': '36.66%', '3': '19.20%', '4': '5.82%'})	(2.65, {'3': '51.34%', '2': '24.93%', '4': '12.33%', '1': '11.40%'})	(1.75, {'2': '42.81%', '1': '41.62%', '3': '14.64%', '4': '0.93%'})												275	GOVERNANCE & POLITICAL SYSTEMS
(1.86, {'2': '41.22%', '1': '36.86%', '3': '20.87%', '4': '1.05%'})		(1.9, {'1': '41.36%', '2': '36.95%', '3': '11.61%', '4': '10.08%'})	(2.39, {'3': '42.01%', '2': '34.16%', '1': '16.77%', '4': '7.06%'})	(1.68, {'1': '47.01%', '2': '40.45%', '3': '10.09%', '4': '2.44%'})												276	GOVERNANCE & POLITICAL SYSTEMS
(1.51, {'1': '71.77%', '3': '22.38%', '2': '5.86%'})		(1.75, {'1': '55.67%', '3': '31.01%', '2': '13.32%'})	(1.94, {'1': '46.95%', '3': '40.94%', '2': '12.11%'})	(2.18, {'3': '44.28%', '2': '29.04%', '1': '26.67%'})												277	ECONOMIC DIMENSIONS
(1.43, {'1': '63.65%', '2': '31.19%', '3': '3.61%', '4': '1.56%'})		(1.53, {'1': '59.08%', '2': '31.17%', '3': '7.67%', '4': '2.08%'})	(1.43, {'1': '64.22%', '2': '29.70%', '3': '4.92%', '4': '1.16%'})	(1.74, {'2': '44.24%', '1': '42.20%', '3': '11.10%', '4': '2.46%'})												278	ECONOMIC DIMENSIONS
(1.69, {'2': '69.25%', '1': '30.75%'})		(1.53, {'2': '52.79%', '1': '47.21%'})	(1.44, {'1': '55.76%', '2': '44.24%'})	(1.46, {'1': '53.92%', '2': '46.08%'})												279	INDIVIDUAL WELLBEING & DEVELOPMENT
(1.68, {'2': '68.32%', '1': '31.68%'})		(1.53, {'2': '53.25%', '1': '46.75%'})	(1.36, {'1': '64.47%', '2': '35.53%'})	(1.41, {'1': '58.83%', '2': '41.17%'})												280	INDIVIDUAL WELLBEING & DEVELOPMENT
(1.69, {'2': '68.66%', '1': '31.34%'})		(1.52, {'2': '52.35%', '1': '47.65%'})	(1.41, {'1': '58.80%', '2': '41.20%'})	(1.46, {'1': '53.75%', '2': '46.25%'})												281	INDIVIDUAL WELLBEING & DEVELOPMENT
(2.67, {'2': '41.69%', '3': '32.83%', '4': '20.00%', '1': '5.49%'})																282	GOVERNANCE & POLITICAL SYSTEMS
(2.62, {'2': '40.18%', '3': '33.89%', '4': '18.04%', '1': '7.89%'})		(2.85, {'4': '34.92%', '3': '27.32%', '2': '25.15%', '1': '12.61%'})	(2.43, {'2': '38.39%', '3': '23.72%', '4': '18.94%', '1': '18.94%'})	(2.66, {'2': '37.58%', '3': '35.50%', '4': '19.25%', '1': '7.67%'})												283	GOVERNANCE & POLITICAL SYSTEMS
(2.79, {'3': '36.79%', '2': '35.43%', '4': '23.28%', '1': '4.50%'})		(2.8, {'3': '31.13%', '4': '29.79%', '2': '28.28%', '1': '10.79%'})	(2.17, {'2': '50.54%', '1': '21.71%', '3': '16.68%', '4': '11.06%'})	(2.34, {'2': '46.75%', '3': '21.92%', '1': '16.92%', '4': '14.42%'})												284	INDIVIDUAL WELLBEING & DEVELOPMENT
(2.41, {'2': '46.81%', '3': '26.51%', '4': '13.59%', '1': '13.09%'})		(2.79, {'3': '32.27%', '4': '29.59%', '2': '25.48%', '1': '12.66%'})	(1.89, {'2': '43.47%', '1': '37.10%', '3': '12.98%', '4': '6.45%'})	(2.74, {'2': '32.50%', '3': '28.75%', '4': '27.83%', '1': '10.92%'})												285	GOVERNANCE & POLITICAL SYSTEMS
(2.72, {'2': '34.53%', '3': '28.67%', '4': '26.66%', '1': '10.14%'})		(2.93, {'4': '35.90%', '3': '30.29%', '2': '24.85%', '1': '8.95%'})	(2.08, {'2': '43.50%', '1': '29.42%', '3': '16.67%', '4': '10.42%'})	(2.75, {'2': '36.75%', '3': '27.92%', '4': '27.58%', '1': '7.75%'})												286	GOVERNANCE & POLITICAL SYSTEMS
(3.06, {'4': '36.74%', '3': '35.65%', '2': '24.18%', '1': '3.43%'})		(3.06, {'4': '39.67%', '3': '33.47%', '2': '20.08%', '1': '6.78%'})	(2.07, {'2': '53.05%', '1': '24.48%', '3': '13.62%', '4': '8.86%'})	(2.92, {'3': '35.33%', '4': '31.08%', '2': '27.75%', '1': '5.83%'})												287	INDIVIDUAL WELLBEING & DEVELOPMENT
		(2.74, {'2': '30.34%', '3': '29.00%', '4': '28.50%', '1': '12.15%'})	(1.87, {'2': '53.04%', '1': '32.47%', '3': '9.66%', '4': '4.83%'})	(2.5, {'2': '48.08%', '3': '22.75%', '4': '18.75%', '1': '10.42%'})												288	GOVERNANCE & POLITICAL SYSTEMS
(2.46, {'2': '45.86%', '3': '27.82%', '4': '14.87%', '1': '11.45%'})		(2.77, {'3': '29.87%', '4': '29.53%', '2': '28.78%', '1': '11.83%'})	(1.94, {'2': '53.04%', '1': '29.48%', '3': '11.99%', '4': '5.50%'})	(2.42, {'2': '48.33%', '3': '20.58%', '4': '17.50%', '1': '13.58%'})												289	GOVERNANCE & POLITICAL SYSTEMS
(2.7, {'3': '38.58%', '2': '37.91%', '4': '18.24%', '1': '5.27%'})		(2.77, {'4': '30.56%', '2': '28.88%', '3': '28.04%', '1': '12.51%'})	(1.85, {'2': '51.83%', '1': '33.75%', '3': '10.25%', '4': '4.17%'})	(2.31, {'2': '47.33%', '3': '18.58%', '1': '18.50%', '4': '15.58%'})												290	GOVERNANCE & POLITICAL SYSTEMS
(1.45, {'1': '68.49%', '2': '21.78%', '3': '5.72%', '4': '4.01%'})		(1.73, {'1': '58.12%', '2': '19.43%', '3': '13.90%', '4': '8.54%'})	(1.17, {'1': '87.76%', '2': '8.72%', '3': '2.35%', '4': '1.17%'})	(2.5, {'4': '30.91%', '1': '29.13%', '2': '23.03%', '3': '16.93%'})												291	SOCIAL & CULTURAL IDENTITY
(1.48, {'1': '52.40%', '2': '47.60%'})		(1.81, {'1': '18.73%', '2': '81.27%'})	(1.79, {'1': '20.70%', '2': '79.30%'})	(1.97, {'1': '3.17%', '2': '96.83%'})	(1.81, {'1': '18.78%', '2': '81.22%'})	(1.5, {'1': '49.82%', '2': '50.18%'})		(1.6, {'1': '39.92%', '2': '60.08%'})	(1.37, {'1': '63.05%', '2': '36.95%'})	(1.03, {'1': '97.44%', '2': '2.56%'})	(1.86, {'1': '13.64%', '2': '86.36%'})	(1.86, {'1': '14.27%', '2': '85.73%'})	(1.18, {'1': '82.31%', '2': '17.69%'})	(1.46, {'1': '53.64%', '2': '46.36%'})	(1.02, {'1': '98.31%', '2': '1.69%'})	292	GOVERNANCE & POLITICAL SYSTEMS
(5, {'3': '14.58%', '4': '10.42%', '5': '66.15%', '9': '8.85%'})		(5, {'3': '2.08%', '4': '7.29%', '5': '35.42%', '8': '21.88%', '9': '33.33%'})	(5, {'2': '1.66%', '3': '17.00%', '4': '8.26%', '5': '49.79%', '8': '4.67%', '9': '18.62%'})	(8, {'3': '37.50%', '8': '62.50%'})	(5, {'3': '28.89%', '4': '4.44%', '5': '51.11%', '8': '11.11%', '9': '4.44%'})	(3, {'2': '3.53%', '3': '40.00%', '4': '10.59%', '5': '30.00%', '8': '4.71%', '9': '11.18%'})		(5, {'5': '94.03%', '8': '5.97%'})	(3, {'2': '3.17%', '3': '48.80%', '5': '46.13%', '9': '1.91%'})	(5, {'2': '29.26%', '3': '1.68%', '4': '31.16%', '5': '36.63%', '8': '0.42%', '9': '0.84%'})	(3, {'3': '33.33%', '5': '33.33%', '8': '33.33%'})	(8, {'3': '17.39%', '4': '4.35%', '5': '26.09%', '8': '30.43%', '9': '21.74%'})	(5, {'2': '24.87%', '3': '11.64%', '4': '28.04%', '5': '32.80%', '8': '0.53%', '9': '2.12%'})	(5, {'3': '2.00%', '4': '26.00%', '5': '67.00%', '8': '5.00%'})	(5, {'2': '11.43%', '3': '0.71%', '4': '12.14%', '5': '73.93%', '8': '1.79%'})	293	GOVERNANCE & POLITICAL SYSTEMS
(1, {'1': '75.31%', '2': '3.74%', '3': '0.25%', '4': '8.73%', '7': '7.73%', '8': '0.75%', '9': '3.49%'})		(9, {'1': '17.54%', '2': '11.48%', '3': '13.28%', '4': '13.11%', '7': '3.44%', '8': '10.66%', '9': '30.49%'})	(1, {'1': '78.69%', '2': '7.60%', '3': '4.96%', '4': '2.31%', '7': '2.85%', '8': '2.36%', '9': '1.23%'})	(1, {'1': '46.13%', '2': '15.19%', '3': '25.41%', '8': '1.38%', '9': '11.88%'})	(8, {'1': '14.29%', '2': '3.50%', '3': '6.20%', '4': '0.54%', '7': '11.59%', '8': '35.85%', '9': '28.03%'})	(1, {'1': '73.04%', '2': '5.12%', '3': '3.75%', '4': '9.90%', '7': '5.12%', '8': '1.02%', '9': '2.05%'})		(1, {'1': '50.38%', '2': '12.28%', '3': '5.12%', '4': '6.39%', '7': '14.58%', '8': '1.53%', '9': '9.72%'})	(1, {'1': '74.85%', '2': '12.56%', '3': '2.37%', '4': '9.43%', '8': '0.78%'})	(1, {'1': '36.00%', '2': '12.00%', '3': '8.00%', '4': '4.00%', '7': '4.00%', '9': '36.00%'})	(1, {'1': '35.91%', '2': '12.30%', '3': '1.19%', '4': '1.98%', '7': '10.71%', '8': '8.33%', '9': '29.56%'})	(1, {'1': '43.02%', '2': '7.08%', '3': '7.82%', '4': '0.56%', '7': '10.43%', '8': '14.15%', '9': '16.95%'})	(9, {'1': '10.19%', '2': '18.52%', '4': '3.70%', '7': '6.48%', '9': '61.11%'})	(1, {'1': '40.22%', '2': '23.18%', '3': '29.61%', '4': '2.51%', '7': '1.68%', '8': '0.56%', '9': '2.23%'})	(1, {'1': '75.00%', '7': '25.00%'})	294	GOVERNANCE & POLITICAL SYSTEMS
(2.34, {'1': '9.59%', '2': '55.18%', '3': '26.95%', '4': '8.28%'})		(2.43, {'1': '6.92%', '2': '55.48%', '3': '25.43%', '4': '12.17%'})	(2.71, {'1': '3.77%', '2': '43.68%', '3': '29.95%', '4': '22.61%'})	(2.92, {'1': '6.42%', '2': '25.51%', '3': '37.52%', '4': '30.55%'})	(2.02, {'1': '19.68%', '2': '63.41%', '3': '12.20%', '4': '4.71%'})	(2.39, {'1': '15.06%', '2': '43.26%', '3': '29.14%', '4': '12.54%'})		(2.78, {'1': '2.63%', '2': '41.48%', '3': '30.75%', '4': '25.15%'})	(2.22, {'1': '0.82%', '2': '76.66%', '3': '22.00%', '4': '0.52%'})	(1.39, {'1': '65.13%', '2': '32.11%', '3': '1.75%', '4': '1.01%'})	(2.82, {'1': '5.50%', '2': '33.93%', '3': '33.22%', '4': '27.35%'})	(2.48, {'1': '8.63%', '2': '50.00%', '3': '26.48%', '4': '14.89%'})	(1.88, {'1': '26.03%', '2': '63.07%', '3': '7.95%', '4': '2.95%'})	(2.36, {'1': '12.68%', '2': '46.80%', '3': '32.43%', '4': '8.09%'})	(1.46, {'1': '56.22%', '2': '42.44%', '3': '0.59%', '4': '0.76%'})	295	GOVERNANCE & POLITICAL SYSTEMS
(2.74, {'1': '5.76%', '2': '37.61%', '3': '33.22%', '4': '23.41%'})		(3.07, {'1': '2.44%', '2': '22.28%', '3': '41.11%', '4': '34.17%'})	(3.14, {'1': '1.54%', '2': '21.12%', '3': '39.37%', '4': '37.97%'})	(3.82, {'1': '0.19%', '2': '0.63%', '3': '16.32%', '4': '82.86%'})	(2.82, {'1': '5.89%', '2': '30.39%', '3': '39.65%', '4': '24.07%'})	(2.57, {'1': '12.03%', '2': '38.10%', '3': '30.39%', '4': '19.48%'})		(3.41, {'1': '1.48%', '2': '10.21%', '3': '34.15%', '4': '54.17%'})	(2.28, {'1': '0.47%', '2': '72.88%', '3': '24.75%', '4': '1.90%'})	(1.24, {'1': '78.20%', '2': '20.14%', '3': '0.99%', '4': '0.67%'})	(3.45, {'1': '1.14%', '2': '10.01%', '3': '31.79%', '4': '57.06%'})	(3.12, {'1': '1.50%', '2': '20.86%', '3': '41.42%', '4': '36.22%'})	(1.77, {'1': '41.72%', '2': '42.98%', '3': '12.29%', '4': '3.01%'})	(2.57, {'1': '13.01%', '2': '33.78%', '3': '36.05%', '4': '17.17%'})	(1.17, {'1': '83.50%', '2': '15.88%', '3': '0.62%'})	296	GOVERNANCE & POLITICAL SYSTEMS
(1.89, {'1': '29.02%', '2': '55.14%', '3': '13.88%', '4': '1.96%'})		(2.04, {'1': '22.76%', '2': '58.04%', '3': '12.01%', '4': '7.19%'})	(1.71, {'1': '44.48%', '2': '43.97%', '3': '8.07%', '4': '3.48%'})	(2.67, {'1': '7.77%', '2': '43.73%', '3': '21.74%', '4': '26.75%'})	(2.04, {'1': '21.23%', '2': '59.19%', '3': '13.72%', '4': '5.87%'})	(2.11, {'1': '29.63%', '2': '41.38%', '3': '16.98%', '4': '12.01%'})		(2.14, {'1': '23.47%', '2': '50.79%', '3': '13.78%', '4': '11.96%'})	(2.03, {'1': '7.76%', '2': '82.06%', '3': '10.08%', '4': '0.09%'})	(1.19, {'1': '84.54%', '2': '12.90%', '3': '1.62%', '4': '0.95%'})	(2.73, {'1': '10.80%', '2': '31.97%', '3': '30.84%', '4': '26.38%'})	(2.32, {'1': '16.27%', '2': '48.31%', '3': '22.78%', '4': '12.64%'})	(1.52, {'1': '55.00%', '2': '38.83%', '3': '5.42%', '4': '0.75%'})	(2.11, {'1': '21.99%', '2': '52.49%', '3': '18.40%', '4': '7.12%'})	(1.12, {'1': '88.51%', '2': '11.36%', '3': '0.12%'})	297	GOVERNANCE & POLITICAL SYSTEMS
(1.98, {'1': '27.60%', '2': '51.72%', '3': '15.37%', '4': '5.31%'})		(2.91, {'1': '2.88%', '2': '32.29%', '3': '35.79%', '4': '29.04%'})	(1.92, {'1': '33.38%', '2': '46.46%', '3': '15.14%', '4': '5.02%'})	(3.32, {'1': '4.09%', '2': '11.88%', '3': '31.82%', '4': '52.21%'})	(2.82, {'1': '4.70%', '2': '33.05%', '3': '38.10%', '4': '24.15%'})	(2.07, {'1': '28.86%', '2': '43.69%', '3': '19.07%', '4': '8.38%'})		(2.92, {'1': '4.41%', '2': '30.77%', '3': '33.19%', '4': '31.63%'})	(2.02, {'1': '6.78%', '2': '85.57%', '3': '6.85%', '4': '0.80%'})	(1.18, {'1': '86.37%', '2': '11.14%', '3': '1.04%', '4': '1.44%'})	(3.23, {'1': '3.46%', '2': '16.98%', '3': '32.68%', '4': '46.89%'})	(2.93, {'1': '5.45%', '2': '27.30%', '3': '36.23%', '4': '31.03%'})	(1.59, {'1': '53.79%', '2': '36.02%', '3': '8.02%', '4': '2.17%'})	(2.16, {'1': '22.41%', '2': '48.64%', '3': '19.97%', '4': '8.98%'})	(1.29, {'1': '72.37%', '2': '26.88%', '3': '0.33%', '4': '0.42%'})	298	GOVERNANCE & POLITICAL SYSTEMS
(2.37, {'1': '12.94%', '2': '47.14%', '3': '30.38%', '4': '9.54%'})		(3.41, {'1': '1.27%', '2': '11.65%', '3': '31.52%', '4': '55.57%'})	(2.42, {'1': '11.09%', '2': '48.30%', '3': '27.89%', '4': '12.71%'})	(3.63, {'1': '1.00%', '2': '4.13%', '3': '25.28%', '4': '69.59%'})	(3.07, {'1': '3.73%', '2': '19.89%', '3': '42.27%', '4': '34.10%'})	(2.64, {'1': '11.31%', '2': '35.69%', '3': '30.25%', '4': '22.75%'})		(3.1, {'1': '3.45%', '2': '25.61%', '3': '28.20%', '4': '42.73%'})	(2.05, {'1': '1.92%', '2': '91.01%', '3': '6.94%', '4': '0.14%'})	(1.2, {'1': '83.68%', '2': '14.13%', '3': '0.71%', '4': '1.48%'})	(3.44, {'1': '1.84%', '2': '8.82%', '3': '33.29%', '4': '56.05%'})	(3.2, {'1': '1.15%', '2': '17.35%', '3': '41.71%', '4': '39.80%'})	(1.97, {'1': '29.22%', '2': '50.00%', '3': '15.54%', '4': '5.24%'})	(2.64, {'1': '9.66%', '2': '34.92%', '3': '36.86%', '4': '18.56%'})	(1.35, {'1': '74.42%', '2': '19.12%', '3': '3.10%', '4': '3.36%'})	299	GOVERNANCE & POLITICAL SYSTEMS
(4, {'1': '8.14%', '2': '1.57%', '3': '12.59%', '4': '33.49%', '5': '7.16%', '6': '3.73%', '7': '14.33%', '8': '4.41%', '9': '3.26%', '10': '1.91%', '12': '1.27%', '13': '0.89%', '14': '2.97%', '21': '4.28%'})		(1, {'1': '26.83%', '2': '6.71%', '3': '19.25%', '4': '4.44%', '5': '7.00%', '6': '5.03%', '7': '5.41%', '8': '1.38%', '9': '8.55%', '10': '9.43%', '13': '1.59%', '14': '2.64%', '21': '1.72%'})	(1, {'1': '34.93%', '2': '0.89%', '3': '34.04%', '4': '13.85%', '5': '1.44%', '6': '0.59%', '7': '6.65%', '8': '2.52%', '9': '4.17%', '10': '0.18%', '12': '0.26%', '14': '0.09%', '21': '0.40%'})	(3, {'1': '11.25%', '2': '1.67%', '3': '35.56%', '4': '22.47%', '5': '1.58%', '6': '1.96%', '7': '9.84%', '8': '0.54%', '9': '6.75%', '10': '2.79%', '12': '0.54%', '13': '0.58%', '14': '1.54%', '21': '2.92%'})	(2, {'1': '16.92%', '2': '22.76%', '3': '14.27%', '4': '15.57%', '5': '3.18%', '6': '2.83%', '7': '4.13%', '8': '0.71%', '9': '5.37%', '10': '9.79%', '13': '1.47%', '14': '1.47%', '21': '1.53%'})	(4, {'1': '8.85%', '2': '2.21%', '3': '8.72%', '4': '22.09%', '5': '10.45%', '6': '4.21%', '7': '8.94%', '8': '9.74%', '9': '5.09%', '10': '2.35%', '12': '4.29%', '13': '1.42%', '14': '3.72%', '21': '7.92%'})		(3, {'1': '15.01%', '2': '2.75%', '3': '38.53%', '4': '18.59%', '5': '0.70%', '6': '3.45%', '7': '5.93%', '8': '4.06%', '9': '2.57%', '10': '7.72%', '13': '0.04%', '14': '0.35%', '21': '0.31%'})	(4, {'1': '23.74%', '2': '0.59%', '3': '5.26%', '4': '38.30%', '5': '5.86%', '6': '0.42%', '7': '2.12%', '8': '8.09%', '9': '2.66%', '10': '0.08%', '12': '2.93%', '13': '2.82%', '14': '4.64%', '21': '2.48%'})	(1, {'1': '30.41%', '2': '3.23%', '3': '19.35%', '4': '17.05%', '5': '7.60%', '6': '1.84%', '7': '2.53%', '8': '2.76%', '9': '3.46%', '10': '1.61%', '12': '1.61%', '13': '0.23%', '14': '6.45%', '21': '1.84%'})	(3, {'1': '9.33%', '2': '4.45%', '3': '33.28%', '4': '23.45%', '5': '4.79%', '6': '2.56%', '7': '7.90%', '8': '1.22%', '9': '3.07%', '10': '6.85%', '13': '1.34%', '14': '0.25%', '21': '1.51%'})	(3, {'1': '11.81%', '2': '5.38%', '3': '21.20%', '4': '19.91%', '5': '1.13%', '6': '1.25%', '7': '7.60%', '8': '1.09%', '9': '5.01%', '10': '2.59%', '11': '21.08%', '12': '0.08%', '13': '1.09%', '14': '0.46%', '21': '0.33%'})	(4, {'1': '13.59%', '3': '16.52%', '4': '21.88%', '5': '9.50%', '6': '2.88%', '7': '1.78%', '8': '11.05%', '9': '5.07%', '10': '4.38%', '12': '8.00%', '13': '0.69%', '14': '0.69%', '21': '3.97%'})	(4, {'1': '23.08%', '2': '0.50%', '3': '12.72%', '4': '29.63%', '5': '6.42%', '6': '1.13%', '7': '9.74%', '8': '1.80%', '9': '7.93%', '10': '0.80%', '12': '1.30%', '13': '0.46%', '14': '0.21%', '21': '4.28%'})	(4, {'1': '6.01%', '2': '0.97%', '3': '4.08%', '4': '43.35%', '5': '3.22%', '6': '2.47%', '7': '1.39%', '8': '7.73%', '9': '4.18%', '10': '1.72%', '12': '4.29%', '13': '1.72%', '14': '3.33%', '18': '12.12%', '21': '3.43%'})	300	GOVERNANCE & POLITICAL SYSTEMS
(2.47, {'1': '16.05%', '2': '38.94%', '3': '26.65%', '4': '18.36%'})		(3.39, {'1': '4.02%', '2': '14.93%', '3': '19.36%', '4': '61.69%'})	(3.17, {'1': '3.42%', '2': '25.37%', '3': '22.14%', '4': '49.08%'})	(3.7, {'1': '0.71%', '2': '4.45%', '3': '18.82%', '4': '76.02%'})	(3.09, {'1': '4.46%', '2': '25.53%', '3': '26.49%', '4': '43.53%'})	(2.73, {'1': '13.47%', '2': '28.27%', '3': '29.90%', '4': '28.36%'})		(2.66, {'1': '17.21%', '2': '35.20%', '3': '11.72%', '4': '35.88%'})	(2.23, {'1': '8.93%', '2': '68.26%', '3': '13.21%', '4': '9.61%'})	(1.68, {'1': '50.00%', '2': '39.29%', '3': '3.57%', '4': '7.14%'})	(3.15, {'1': '4.64%', '2': '18.86%', '3': '33.07%', '4': '43.43%'})	(3.15, {'1': '4.31%', '2': '19.99%', '3': '32.14%', '4': '43.56%'})	(1.94, {'1': '30.39%', '2': '48.24%', '3': '18.37%', '4': '3.00%'})	(2.65, {'1': '12.68%', '2': '32.74%', '3': '31.75%', '4': '22.83%'})	(1.52, {'1': '57.56%', '2': '34.56%', '3': '6.26%', '4': '1.62%'})	301	GOVERNANCE & POLITICAL SYSTEMS
(1.76, {'1': '24.05%', '2': '75.95%'})		(1.63, {'1': '37.32%', '2': '62.68%'})	(1.56, {'1': '43.87%', '2': '56.13%'})	(1.36, {'1': '63.80%', '2': '36.20%'})	(1.79, {'1': '21.29%', '2': '78.71%'})	(1.68, {'1': '32.03%', '2': '67.97%'})		(1.56, {'1': '43.91%', '2': '56.09%'})	(1.85, {'1': '14.55%', '2': '85.45%'})	(1.96, {'1': '4.32%', '2': '95.68%'})	(1.48, {'1': '51.61%', '2': '48.39%'})	(1.78, {'1': '21.74%', '2': '78.26%'})	(1.88, {'1': '11.71%', '2': '88.29%'})	(1.66, {'1': '34.26%', '2': '65.74%'})	(1.97, {'1': '3.47%', '2': '96.53%'})	302	GOVERNANCE & POLITICAL SYSTEMS
(2, {'1': '17.78%', '2': '58.89%', '3': '4.37%', '4': '4.08%', '5': '4.96%', '6': '0.87%', '7': '5.83%', '8': '3.21%'})		(1, {'1': '41.84%', '2': '6.42%', '3': '7.47%', '4': '4.86%', '5': '27.78%', '6': '2.60%', '7': '2.78%', '8': '6.08%', '9': '0.17%'})	(3, {'1': '13.79%', '2': '22.79%', '3': '25.28%', '4': '20.93%', '5': '9.69%', '6': '1.78%', '7': '3.86%', '8': '1.56%', '9': '0.34%'})	(1, {'1': '40.34%', '2': '16.79%', '3': '5.68%', '4': '16.30%', '5': '1.57%', '6': '10.87%', '7': '1.45%', '8': '3.86%', '9': '3.14%'})	(1, {'1': '56.67%', '2': '6.67%', '3': '3.81%', '4': '9.52%', '5': '7.14%', '6': '0.95%', '7': '10.00%', '8': '5.24%'})	(1, {'1': '67.97%', '2': '8.06%', '3': '8.99%', '4': '8.29%', '5': '2.76%', '6': '0.46%', '7': '0.23%', '8': '3.23%'})		(1, {'1': '71.56%', '2': '7.25%', '3': '2.36%', '4': '11.59%', '5': '1.63%', '6': '0.18%', '7': '4.17%', '8': '1.09%', '9': '0.18%'})	(1, {'1': '81.25%', '2': '6.31%', '5': '12.44%'})	(1, {'1': '24.53%', '2': '3.77%', '3': '15.09%', '4': '22.64%', '5': '3.77%', '7': '24.53%', '8': '5.66%'})	(2, {'1': '24.61%', '2': '39.75%', '3': '16.69%', '4': '3.54%', '5': '4.95%', '6': '0.85%', '7': '6.65%', '8': '2.40%', '9': '0.57%'})	(1, {'1': '40.91%', '2': '11.04%', '3': '4.87%', '4': '5.52%', '5': '21.43%', '6': '0.32%', '7': '12.01%', '8': '3.90%'})	(1, {'1': '41.33%', '2': '1.33%', '3': '24.00%', '4': '20.00%', '5': '6.67%', '6': '1.33%', '7': '1.33%', '8': '4.00%'})	(3, {'1': '24.61%', '2': '11.42%', '3': '38.78%', '4': '9.65%', '5': '1.57%', '6': '0.20%', '7': '3.15%', '8': '3.35%', '9': '7.28%'})	(1, {'1': '47.83%', '3': '4.35%', '4': '13.04%', '5': '17.39%', '8': '17.39%'})	303	GOVERNANCE & POLITICAL SYSTEMS
(1, {'1': '72.14%', '2': '1.39%', '3': '2.79%', '4': '11.14%', '5': '5.29%', '8': '7.24%'})		(1, {'1': '49.14%', '2': '23.02%', '3': '8.76%', '4': '7.73%', '5': '4.30%', '8': '7.04%'})	(1, {'1': '90.00%', '2': '1.58%', '3': '1.29%', '4': '2.81%', '5': '2.27%', '8': '2.05%'})	(1, {'1': '83.23%', '2': '4.72%', '3': '1.78%', '4': '5.66%', '5': '2.10%', '8': '2.52%'})	(1, {'1': '44.40%', '2': '32.33%', '3': '4.31%', '4': '12.93%', '5': '2.16%', '8': '3.88%'})	(1, {'1': '55.72%', '2': '1.30%', '3': '2.59%', '4': '13.61%', '5': '16.63%', '8': '10.15%'})		(1, {'1': '82.42%', '2': '1.21%', '3': '1.82%', '4': '3.03%', '5': '3.48%', '8': '8.03%'})	(1, {'1': '48.90%', '4': '43.30%', '5': '3.12%', '8': '4.68%'})	(1, {'1': '43.48%', '2': '10.87%', '3': '8.70%', '4': '13.04%', '5': '10.87%', '8': '13.04%'})	(1, {'1': '75.64%', '2': '7.22%', '3': '1.42%', '4': '7.47%', '5': '5.28%', '8': '2.96%'})	(1, {'1': '68.56%', '2': '9.28%', '3': '3.89%', '4': '6.89%', '5': '5.09%', '8': '6.29%'})	(1, {'1': '23.85%', '2': '8.26%', '3': '13.76%', '4': '23.85%', '5': '14.68%', '8': '15.60%'})	(1, {'1': '82.56%', '2': '1.16%', '3': '0.58%', '4': '9.30%', '5': '4.26%', '8': '2.13%'})	(4, {'1': '4.35%', '4': '73.91%', '5': '17.39%', '8': '4.35%'})	304	GOVERNANCE & POLITICAL SYSTEMS
(1.57, {'1': '42.77%', '2': '57.23%'})		(1.8, {'1': '20.02%', '2': '79.98%'})	(1.76, {'1': '23.67%', '2': '76.33%'})	(1.82, {'1': '18.23%', '2': '81.77%'})	(1.74, {'1': '25.62%', '2': '74.38%'})	(1.65, {'1': '34.96%', '2': '65.04%'})		(1.78, {'1': '21.91%', '2': '78.09%'})	(1.57, {'1': '43.42%', '2': '56.58%'})	(1.5, {'1': '50.16%', '2': '49.84%'})	(1.74, {'1': '25.67%', '2': '74.33%'})	(1.82, {'1': '17.75%', '2': '82.25%'})	(1.52, {'1': '48.18%', '2': '51.82%'})	(1.75, {'1': '24.57%', '2': '75.43%'})	(1.66, {'1': '34.12%', '2': '65.88%'})	305	GOVERNANCE & POLITICAL SYSTEMS
(1.36, {'1': '71.33%', '2': '22.59%', '3': '4.57%', '4': '1.51%'})		(2.66, {'1': '13.39%', '2': '38.12%', '3': '17.70%', '4': '30.79%'})	(2.13, {'1': '25.34%', '2': '50.26%', '3': '10.32%', '4': '14.07%'})	(3.0, {'1': '8.83%', '2': '25.49%', '3': '22.85%', '4': '42.82%'})	(2.26, {'1': '23.67%', '2': '44.78%', '3': '13.34%', '4': '18.21%'})	(2.09, {'1': '31.71%', '2': '36.58%', '3': '22.31%', '4': '9.40%'})		(2.63, {'1': '17.13%', '2': '37.70%', '3': '10.64%', '4': '34.53%'})	(1.86, {'1': '24.02%', '2': '67.48%', '3': '7.20%', '4': '1.30%'})	(1.24, {'1': '81.50%', '2': '15.01%', '3': '1.40%', '4': '2.10%'})	(2.52, {'1': '18.56%', '2': '35.60%', '3': '21.02%', '4': '24.83%'})	(2.56, {'1': '9.54%', '2': '44.48%', '3': '26.15%', '4': '19.83%'})	(N/A, {})	(2.05, {'1': '32.62%', '2': '39.11%', '3': '19.14%', '4': '9.13%'})	(1.29, {'1': '73.74%', '2': '23.82%', '3': '1.77%', '4': '0.67%'})	306	GOVERNANCE & POLITICAL SYSTEMS
(1.85, {'1': '43.07%', '2': '34.71%', '3': '16.43%', '4': '5.79%'})		(2.12, {'1': '29.33%', '2': '43.92%', '3': '12.04%', '4': '14.71%'})	(1.62, {'1': '55.69%', '2': '33.08%', '3': '4.59%', '4': '6.64%'})	(2.6, {'1': '15.52%', '2': '37.01%', '3': '19.87%', '4': '27.60%'})	(2.25, {'1': '23.01%', '2': '45.66%', '3': '14.39%', '4': '16.94%'})	(2.08, {'1': '33.33%', '2': '37.32%', '3': '17.01%', '4': '12.34%'})		(2.38, {'1': '25.59%', '2': '38.57%', '3': '7.71%', '4': '28.14%'})	(1.91, {'1': '23.50%', '2': '64.16%', '3': '10.46%', '4': '1.87%'})	(1.21, {'1': '84.27%', '2': '12.31%', '3': '1.83%', '4': '1.60%'})	(2.66, {'1': '15.55%', '2': '33.19%', '3': '20.62%', '4': '30.63%'})	(2.46, {'1': '12.04%', '2': '47.60%', '3': '22.23%', '4': '18.13%'})	(1.6, {'1': '56.15%', '2': '30.88%', '3': '9.96%', '4': '3.01%'})	(2.16, {'1': '27.98%', '2': '40.67%', '3': '19.01%', '4': '12.35%'})	(1.42, {'1': '68.37%', '2': '21.90%', '3': '9.06%', '4': '0.67%'})	307	GOVERNANCE & POLITICAL SYSTEMS
(2.29, {'1': '25.72%', '2': '33.56%', '3': '27.13%', '4': '13.59%'})		(3.42, {'1': '3.78%', '2': '13.75%', '3': '19.09%', '4': '63.37%'})	(3.51, {'1': '2.29%', '2': '15.88%', '3': '10.45%', '4': '71.39%'})	(3.31, {'1': '6.98%', '2': '14.72%', '3': '18.39%', '4': '59.91%'})	(3.08, {'1': '8.97%', '2': '23.60%', '3': '18.05%', '4': '49.38%'})	(2.71, {'1': '11.81%', '2': '31.68%', '3': '29.72%', '4': '26.78%'})		(3.62, {'1': '5.04%', '2': '9.11%', '3': '4.20%', '4': '81.65%'})	(2.27, {'1': '11.69%', '2': '58.80%', '3': '20.78%', '4': '8.73%'})	(1.29, {'1': '76.29%', '2': '19.84%', '3': '2.29%', '4': '1.57%'})	(2.82, {'1': '10.70%', '2': '31.08%', '3': '23.71%', '4': '34.51%'})	(N/A, {})	(1.86, {'1': '41.10%', '2': '37.81%', '3': '15.50%', '4': '5.58%'})	(2.68, {'1': '10.69%', '2': '34.32%', '3': '31.54%', '4': '23.45%'})	(1.41, {'1': '65.18%', '2': '30.01%', '3': '3.35%', '4': '1.46%'})	308	GOVERNANCE & POLITICAL SYSTEMS
(2.02, {'1': '36.94%', '2': '33.25%', '3': '20.21%', '4': '9.60%'})		(3.33, {'1': '4.97%', '2': '17.31%', '3': '17.31%', '4': '60.41%'})	(3.0, {'1': '8.59%', '2': '30.46%', '3': '13.42%', '4': '47.53%'})	(3.29, {'1': '8.88%', '2': '15.33%', '3': '13.36%', '4': '62.44%'})	(2.83, {'1': '12.50%', '2': '31.40%', '3': '17.19%', '4': '38.91%'})	(2.78, {'1': '11.15%', '2': '27.66%', '3': '32.98%', '4': '28.22%'})		(2.43, {'1': '24.80%', '2': '38.12%', '3': '6.11%', '4': '30.96%'})	(1.99, {'1': '20.60%', '2': '65.81%', '3': '7.57%', '4': '6.03%'})	(1.23, {'1': '81.81%', '2': '14.53%', '3': '2.51%', '4': '1.16%'})	(2.95, {'1': '12.15%', '2': '22.81%', '3': '22.73%', '4': '42.32%'})	(2.74, {'1': '8.01%', '2': '37.40%', '3': '27.57%', '4': '27.01%'})	(1.8, {'1': '44.33%', '2': '37.49%', '3': '12.24%', '4': '5.95%'})	(2.57, {'1': '14.22%', '2': '34.88%', '3': '30.16%', '4': '20.74%'})	(1.39, {'1': '71.10%', '2': '19.55%', '3': '8.68%', '4': '0.67%'})	309	GOVERNANCE & POLITICAL SYSTEMS
(2.65, {'1': '11.23%', '2': '31.93%', '3': '37.03%', '4': '19.80%'})		(3.62, {'1': '1.64%', '2': '9.11%', '3': '14.60%', '4': '74.65%'})	(3.71, {'1': '0.60%', '2': '9.21%', '3': '8.52%', '4': '81.67%'})	(3.18, {'1': '7.86%', '2': '21.69%', '3': '15.51%', '4': '54.94%'})	(3.13, {'1': '7.81%', '2': '22.11%', '3': '19.08%', '4': '51.00%'})	(2.89, {'1': '9.24%', '2': '25.78%', '3': '31.87%', '4': '33.12%'})		(3.67, {'1': '3.29%', '2': '9.02%', '3': '4.62%', '4': '83.07%'})	(2.96, {'1': '4.90%', '2': '25.04%', '3': '39.05%', '4': '31.01%'})	(N/A, {})	(3.11, {'1': '7.21%', '2': '21.55%', '3': '24.76%', '4': '46.48%'})	(3.11, {'1': '3.75%', '2': '23.54%', '3': '30.69%', '4': '42.02%'})	(2.28, {'1': '20.70%', '2': '41.40%', '3': '27.26%', '4': '10.63%'})	(2.85, {'1': '7.04%', '2': '28.58%', '3': '36.38%', '4': '27.99%'})	(N/A, {})	310	GOVERNANCE & POLITICAL SYSTEMS
(1.38, {'1': '74.87%', '2': '15.91%', '3': '5.88%', '4': '3.34%'})		(1.81, {'1': '49.37%', '2': '31.76%', '3': '7.47%', '4': '11.39%'})	(1.29, {'1': '78.24%', '2': '17.04%', '3': '2.36%', '4': '2.37%'})	(1.68, {'1': '52.44%', '2': '35.79%', '3': '3.17%', '4': '8.59%'})	(2.21, {'1': '33.35%', '2': '34.06%', '3': '11.20%', '4': '21.40%'})	(1.87, {'1': '46.54%', '2': '29.27%', '3': '14.68%', '4': '9.51%'})		(1.23, {'1': '82.88%', '2': '14.18%', '3': '0.42%', '4': '2.52%'})	(1.62, {'1': '44.40%', '2': '50.28%', '3': '4.38%', '4': '0.93%'})	(1.19, {'1': '86.33%', '2': '10.07%', '3': '2.19%', '4': '1.41%'})	(2.43, {'1': '30.09%', '2': '25.64%', '3': '15.91%', '4': '28.36%'})	(N/A, {})	(1.51, {'1': '65.68%', '2': '22.60%', '3': '6.70%', '4': '5.02%'})	(1.85, {'1': '46.61%', '2': '30.48%', '3': '14.15%', '4': '8.76%'})	(1.18, {'1': '84.05%', '2': '14.33%', '3': '0.93%', '4': '0.68%'})	311	GOVERNANCE & POLITICAL SYSTEMS
(2.14, {'1': '35.25%', '2': '28.60%', '3': '23.49%', '4': '12.66%'})		(N/A, {})	(1.44, {'1': '70.42%', '2': '20.90%', '3': '3.16%', '4': '5.52%'})	(N/A, {})	(2.42, {'1': '25.20%', '2': '33.76%', '3': '14.88%', '4': '26.17%'})	(N/A, {})		(N/A, {})	(N/A, {})	(1.25, {'1': '82.91%', '2': '11.90%', '3': '2.63%', '4': '2.57%'})	(2.65, {'1': '18.54%', '2': '29.71%', '3': '20.42%', '4': '31.33%'})	(2.63, {'1': '14.52%', '2': '35.39%', '3': '22.93%', '4': '27.16%'})	(1.59, {'1': '59.28%', '2': '27.24%', '3': '9.08%', '4': '4.40%'})	(2.12, {'1': '29.27%', '2': '41.42%', '3': '17.59%', '4': '11.73%'})	(N/A, {})	312	GOVERNANCE & POLITICAL SYSTEMS
(N/A, {})		(N/A, {})	(N/A, {})	(N/A, {})	(N/A, {})	(N/A, {})		(3.08, {'1': '11.57%', '2': '25.42%', '3': '6.76%', '4': '56.25%'})	(N/A, {})	(N/A, {})	(N/A, {})	(N/A, {})	(N/A, {})	(N/A, {})	(N/A, {})	313	GOVERNANCE & POLITICAL SYSTEMS
(N/A, {})		(N/A, {})	(N/A, {})	(N/A, {})	(N/A, {})	(N/A, {})		(N/A, {})	(N/A, {})	(N/A, {})	(N/A, {})	(2.8, {'1': '9.73%', '2': '33.35%', '3': '23.88%', '4': '33.04%'})	(N/A, {})	(N/A, {})	(N/A, {})	314	GOVERNANCE & POLITICAL SYSTEMS
(N/A, {})		(2.63, {'1': '13.43%', '2': '39.48%', '3': '18.12%', '4': '28.96%'})	(2.01, {'1': '28.68%', '2': '52.11%', '3': '8.37%', '4': '10.84%'})	(2.81, {'1': '12.28%', '2': '31.58%', '3': '19.05%', '4': '37.09%'})	(2.25, {'1': '24.71%', '2': '43.98%', '3': '13.38%', '4': '17.93%'})	(N/A, {})		(N/A, {})	(N/A, {})	(1.23, {'1': '79.45%', '2': '18.22%', '3': '2.12%', '4': '0.21%'})	(2.63, {'1': '16.93%', '2': '33.40%', '3': '19.00%', '4': '30.67%'})	(2.33, {'1': '15.57%', '2': '49.70%', '3': '20.83%', '4': '13.91%'})	(1.57, {'1': '50.50%', '2': '42.55%', '3': '6.03%', '4': '0.92%'})	(2.06, {'1': '32.94%', '2': '37.61%', '3': '19.58%', '4': '9.86%'})	(1.13, {'1': '88.69%', '2': '9.55%', '3': '1.76%'})	315	GOVERNANCE & POLITICAL SYSTEMS
(2.28, {'1': '20.72%', '2': '43.04%', '3': '23.98%', '4': '12.26%'})		(3.01, {'1': '7.08%', '2': '27.50%', '3': '22.40%', '4': '43.01%'})	(2.78, {'1': '5.12%', '2': '43.82%', '3': '19.21%', '4': '31.86%'})	(2.91, {'1': '4.05%', '2': '37.45%', '3': '21.96%', '4': '36.54%'})	(2.67, {'1': '12.52%', '2': '39.84%', '3': '16.24%', '4': '31.40%'})	(2.51, {'1': '15.02%', '2': '36.52%', '3': '30.77%', '4': '17.69%'})		(2.91, {'1': '10.60%', '2': '34.45%', '3': '8.47%', '4': '46.48%'})	(1.97, {'1': '26.64%', '2': '55.76%', '3': '11.11%', '4': '6.48%'})	(1.8, {'1': '42.86%', '2': '38.45%', '3': '14.92%', '4': '3.78%'})	(2.72, {'1': '13.91%', '2': '32.02%', '3': '22.39%', '4': '31.68%'})	(2.71, {'1': '5.26%', '2': '40.28%', '3': '32.69%', '4': '21.77%'})	(2.08, {'1': '23.59%', '2': '49.12%', '3': '22.67%', '4': '4.62%'})	(2.58, {'1': '10.75%', '2': '37.25%', '3': '34.79%', '4': '17.20%'})	(1.77, {'1': '41.80%', '2': '41.04%', '3': '15.76%', '4': '1.40%'})	316	GOVERNANCE & POLITICAL SYSTEMS
(2.4, {'1': '17.34%', '2': '39.43%', '3': '28.92%', '4': '14.31%'})		(2.65, {'1': '11.21%', '2': '41.46%', '3': '18.45%', '4': '28.87%'})	(2.59, {'1': '11.37%', '2': '46.12%', '3': '15.06%', '4': '27.45%'})	(2.77, {'1': '10.85%', '2': '34.67%', '3': '21.02%', '4': '33.46%'})	(2.77, {'1': '12.86%', '2': '34.89%', '3': '15.11%', '4': '37.14%'})	(2.4, {'1': '19.28%', '2': '37.95%', '3': '26.69%', '4': '16.08%'})		(2.81, {'1': '13.22%', '2': '34.71%', '3': '9.44%', '4': '42.63%'})	(2.12, {'1': '14.65%', '2': '65.83%', '3': '12.77%', '4': '6.76%'})	(1.54, {'1': '60.31%', '2': '29.36%', '3': '6.62%', '4': '3.72%'})	(2.81, {'1': '9.64%', '2': '34.08%', '3': '22.15%', '4': '34.13%'})	(2.37, {'1': '11.01%', '2': '53.91%', '3': '22.11%', '4': '12.97%'})	(2.14, {'1': '22.94%', '2': '47.83%', '3': '21.44%', '4': '7.80%'})	(2.6, {'1': '8.07%', '2': '40.65%', '3': '34.26%', '4': '17.02%'})	(1.75, {'1': '48.85%', '2': '33.84%', '3': '10.83%', '4': '6.48%'})	317	GOVERNANCE & POLITICAL SYSTEMS
(2.57, {'1': '12.51%', '2': '34.97%', '3': '35.61%', '4': '16.91%'})		(2.91, {'1': '8.96%', '2': '32.39%', '3': '17.42%', '4': '41.22%'})	(2.78, {'1': '8.77%', '2': '39.80%', '3': '16.13%', '4': '35.29%'})	(2.77, {'1': '11.75%', '2': '35.44%', '3': '16.93%', '4': '35.88%'})	(2.6, {'1': '15.79%', '2': '39.75%', '3': '13.22%', '4': '31.23%'})	(2.52, {'1': '17.44%', '2': '31.79%', '3': '31.98%', '4': '18.79%'})		(3.01, {'1': '9.27%', '2': '31.32%', '3': '8.72%', '4': '50.69%'})	(2.99, {'1': '3.83%', '2': '26.77%', '3': '35.65%', '4': '33.75%'})	(1.33, {'1': '74.25%', '2': '20.78%', '3': '2.94%', '4': '2.03%'})	(2.91, {'1': '9.36%', '2': '28.01%', '3': '25.11%', '4': '37.52%'})	(2.43, {'1': '10.19%', '2': '50.97%', '3': '24.42%', '4': '14.42%'})	(2.1, {'1': '23.57%', '2': '49.36%', '3': '20.68%', '4': '6.38%'})	(2.6, {'1': '10.98%', '2': '38.98%', '3': '29.33%', '4': '20.70%'})	(1.34, {'1': '73.36%', '2': '20.83%', '3': '4.55%', '4': '1.26%'})	318	GOVERNANCE & POLITICAL SYSTEMS
(N/A, {})		(N/A, {})	(N/A, {})	(N/A, {})	(N/A, {})	(N/A, {})		(N/A, {})	(N/A, {})	(N/A, {})	(2.96, {'1': '11.41%', '2': '24.77%', '3': '20.46%', '4': '43.36%'})	(N/A, {})	(N/A, {})	(N/A, {})	(N/A, {})	319	GOVERNANCE & POLITICAL SYSTEMS
(N/A, {})		(N/A, {})	(N/A, {})	(N/A, {})	(N/A, {})	(N/A, {})		(N/A, {})	(N/A, {})	(N/A, {})	(2.96, {'1': '12.16%', '2': '23.06%', '3': '21.71%', '4': '43.07%'})	(N/A, {})	(N/A, {})	(N/A, {})	(N/A, {})	320	GOVERNANCE & POLITICAL SYSTEMS
(N/A, {})		(N/A, {})	(N/A, {})	(N/A, {})	(N/A, {})	(N/A, {})		(N/A, {})	(N/A, {})	(N/A, {})	(3.09, {'1': '10.62%', '2': '19.09%', '3': '21.46%', '4': '48.84%'})	(N/A, {})	(N/A, {})	(N/A, {})	(N/A, {})	321	GOVERNANCE & POLITICAL SYSTEMS
(N/A, {})		(N/A, {})	(N/A, {})	(N/A, {})	(N/A, {})	(N/A, {})		(N/A, {})	(N/A, {})	(N/A, {})	(2.86, {'1': '9.67%', '2': '29.32%', '3': '26.21%', '4': '34.80%'})	(N/A, {})	(N/A, {})	(N/A, {})	(N/A, {})	322	GOVERNANCE & POLITICAL SYSTEMS
(N/A, {})		(2.14, {'1': '44.43%', '2': '23.03%', '3': '6.38%', '4': '26.16%'})	(N/A, {})	(N/A, {})	(N/A, {})	(N/A, {})		(N/A, {})	(N/A, {})	(N/A, {})	(N/A, {})	(N/A, {})	(N/A, {})	(N/A, {})	(N/A, {})	323	GOVERNANCE & POLITICAL SYSTEMS
(N/A, {})		(2.83, {'1': '21.94%', '2': '19.17%', '3': '12.74%', '4': '46.15%'})	(N/A, {})	(N/A, {})	(N/A, {})	(N/A, {})		(N/A, {})	(N/A, {})	(N/A, {})	(N/A, {})	(N/A, {})	(N/A, {})	(N/A, {})	(N/A, {})	324	GOVERNANCE & POLITICAL SYSTEMS
(N/A, {})		(3.57, {'1': '3.55%', '2': '7.74%', '3': '16.37%', '4': '72.34%'})	(N/A, {})	(N/A, {})	(N/A, {})	(N/A, {})		(N/A, {})	(N/A, {})	(N/A, {})	(N/A, {})	(N/A, {})	(N/A, {})	(N/A, {})	(N/A, {})	325	GOVERNANCE & POLITICAL SYSTEMS
(N/A, {})		(3.51, {'1': '4.61%', '2': '10.12%', '3': '14.85%', '4': '70.42%'})	(N/A, {})	(N/A, {})	(N/A, {})	(N/A, {})		(N/A, {})	(N/A, {})	(N/A, {})	(N/A, {})	(N/A, {})	(N/A, {})	(N/A, {})	(N/A, {})	326	GOVERNANCE & POLITICAL SYSTEMS
(N/A, {})		(3.47, {'1': '5.62%', '2': '10.09%', '3': '16.35%', '4': '67.94%'})	(N/A, {})	(N/A, {})	(N/A, {})	(N/A, {})		(N/A, {})	(N/A, {})	(N/A, {})	(N/A, {})	(N/A, {})	(N/A, {})	(N/A, {})	(N/A, {})	327	GOVERNANCE & POLITICAL SYSTEMS
(N/A, {})		(3.48, {'1': '3.56%', '2': '11.69%', '3': '17.53%', '4': '67.22%'})	(N/A, {})	(N/A, {})	(N/A, {})	(N/A, {})		(N/A, {})	(N/A, {})	(N/A, {})	(N/A, {})	(N/A, {})	(N/A, {})	(N/A, {})	(N/A, {})	328	GOVERNANCE & POLITICAL SYSTEMS
(N/A, {})		(3.6, {'1': '3.55%', '2': '7.49%', '3': '14.47%', '4': '74.49%'})	(N/A, {})	(N/A, {})	(N/A, {})	(N/A, {})		(N/A, {})	(N/A, {})	(N/A, {})	(N/A, {})	(N/A, {})	(N/A, {})	(N/A, {})	(N/A, {})	329	GOVERNANCE & POLITICAL SYSTEMS
(N/A, {})		(3.65, {'1': '1.95%', '2': '7.02%', '3': '15.47%', '4': '75.55%'})	(N/A, {})	(N/A, {})	(N/A, {})	(N/A, {})		(N/A, {})	(N/A, {})	(N/A, {})	(N/A, {})	(N/A, {})	(N/A, {})	(N/A, {})	(N/A, {})	330	GOVERNANCE & POLITICAL SYSTEMS
(N/A, {})		(N/A, {})	(N/A, {})	(3.38, {'1': '8.02%', '2': '13.10%', '3': '11.58%', '4': '67.30%'})	(N/A, {})	(N/A, {})		(N/A, {})	(N/A, {})	(N/A, {})	(N/A, {})	(N/A, {})	(N/A, {})	(N/A, {})	(N/A, {})	331	GOVERNANCE & POLITICAL SYSTEMS
(N/A, {})		(N/A, {})	(N/A, {})	(3.33, {'1': '11.08%', '2': '11.59%', '3': '10.70%', '4': '66.62%'})	(N/A, {})	(N/A, {})		(N/A, {})	(N/A, {})	(N/A, {})	(N/A, {})	(N/A, {})	(N/A, {})	(N/A, {})	(N/A, {})	332	GOVERNANCE & POLITICAL SYSTEMS
(N/A, {})		(N/A, {})	(N/A, {})	(3.48, {'1': '7.02%', '2': '8.43%', '3': '14.43%', '4': '70.11%'})	(N/A, {})	(N/A, {})		(N/A, {})	(N/A, {})	(N/A, {})	(N/A, {})	(N/A, {})	(N/A, {})	(N/A, {})	(N/A, {})	333	GOVERNANCE & POLITICAL SYSTEMS
(N/A, {})		(N/A, {})	(N/A, {})	(3.09, {'1': '18.82%', '2': '12.80%', '3': '8.58%', '4': '59.80%'})	(N/A, {})	(N/A, {})		(N/A, {})	(N/A, {})	(N/A, {})	(N/A, {})	(N/A, {})	(N/A, {})	(N/A, {})	(N/A, {})	334	GOVERNANCE & POLITICAL SYSTEMS
(N/A, {})		(N/A, {})	(N/A, {})	(3.28, {'1': '14.36%', '2': '9.23%', '3': '10.64%', '4': '65.77%'})	(N/A, {})	(N/A, {})		(N/A, {})	(N/A, {})	(N/A, {})	(N/A, {})	(N/A, {})	(N/A, {})	(N/A, {})	(N/A, {})	335	GOVERNANCE & POLITICAL SYSTEMS
(N/A, {})		(N/A, {})	(N/A, {})	(3.23, {'1': '9.48%', '2': '16.26%', '3': '16.13%', '4': '58.13%'})	(N/A, {})	(N/A, {})		(N/A, {})	(N/A, {})	(N/A, {})	(N/A, {})	(N/A, {})	(N/A, {})	(N/A, {})	(N/A, {})	336	GOVERNANCE & POLITICAL SYSTEMS
(N/A, {})		(N/A, {})	(N/A, {})	(3.45, {'1': '5.94%', '2': '10.85%', '3': '15.25%', '4': '67.96%'})	(N/A, {})	(N/A, {})		(N/A, {})	(N/A, {})	(N/A, {})	(N/A, {})	(N/A, {})	(N/A, {})	(N/A, {})	(N/A, {})	337	GOVERNANCE & POLITICAL SYSTEMS
(N/A, {})		(N/A, {})	(N/A, {})	(3.61, {'1': '1.68%', '2': '8.26%', '3': '17.65%', '4': '72.41%'})	(N/A, {})	(N/A, {})		(N/A, {})	(N/A, {})	(N/A, {})	(N/A, {})	(N/A, {})	(N/A, {})	(N/A, {})	(N/A, {})	338	GOVERNANCE & POLITICAL SYSTEMS
(N/A, {})		(N/A, {})	(N/A, {})	(3.67, {'1': '3.07%', '2': '4.32%', '3': '15.62%', '4': '76.99%'})	(N/A, {})	(N/A, {})		(N/A, {})	(N/A, {})	(N/A, {})	(N/A, {})	(N/A, {})	(N/A, {})	(N/A, {})	(N/A, {})	339	GOVERNANCE & POLITICAL SYSTEMS
(N/A, {})		(N/A, {})	(N/A, {})	(3.62, {'1': '2.25%', '2': '8.59%', '3': '13.61%', '4': '75.56%'})	(N/A, {})	(N/A, {})		(N/A, {})	(N/A, {})	(N/A, {})	(N/A, {})	(N/A, {})	(N/A, {})	(N/A, {})	(N/A, {})	340	GOVERNANCE & POLITICAL SYSTEMS
(N/A, {})		(N/A, {})	(N/A, {})	(3.58, {'1': '4.05%', '2': '7.96%', '3': '14.04%', '4': '73.95%'})	(N/A, {})	(N/A, {})		(N/A, {})	(N/A, {})	(N/A, {})	(N/A, {})	(N/A, {})	(N/A, {})	(N/A, {})	(N/A, {})	341	GOVERNANCE & POLITICAL SYSTEMS
(N/A, {})		(N/A, {})	(N/A, {})	(3.38, {'1': '5.09%', '2': '14.36%', '3': '18.28%', '4': '62.27%'})	(N/A, {})	(N/A, {})		(N/A, {})	(N/A, {})	(N/A, {})	(N/A, {})	(N/A, {})	(N/A, {})	(N/A, {})	(N/A, {})	342	GOVERNANCE & POLITICAL SYSTEMS
(N/A, {})		(N/A, {})	(N/A, {})	(3.75, {'1': '1.51%', '2': '3.92%', '3': '12.95%', '4': '81.63%'})	(N/A, {})	(N/A, {})		(N/A, {})	(N/A, {})	(N/A, {})	(N/A, {})	(N/A, {})	(N/A, {})	(N/A, {})	(N/A, {})	343	GOVERNANCE & POLITICAL SYSTEMS
(N/A, {})		(N/A, {})	(N/A, {})	(3.79, {'1': '0.16%', '2': '4.29%', '3': '11.92%', '4': '83.62%'})	(N/A, {})	(N/A, {})		(N/A, {})	(N/A, {})	(N/A, {})	(N/A, {})	(N/A, {})	(N/A, {})	(N/A, {})	(N/A, {})	344	GOVERNANCE & POLITICAL SYSTEMS
(N/A, {})		(N/A, {})	(N/A, {})	(3.42, {'1': '6.17%', '2': '12.89%', '3': '14.09%', '4': '66.85%'})	(N/A, {})	(N/A, {})		(N/A, {})	(N/A, {})	(N/A, {})	(N/A, {})	(N/A, {})	(N/A, {})	(N/A, {})	(N/A, {})	345	GOVERNANCE & POLITICAL SYSTEMS
(N/A, {})		(N/A, {})	(N/A, {})	(N/A, {})	(N/A, {})	(N/A, {})		(N/A, {})	(N/A, {})	(N/A, {})	(2.95, {'1': '12.78%', '2': '22.24%', '3': '22.64%', '4': '42.34%'})	(N/A, {})	(N/A, {})	(N/A, {})	(N/A, {})	346	GOVERNANCE & POLITICAL SYSTEMS
(N/A, {})		(N/A, {})	(N/A, {})	(N/A, {})	(N/A, {})	(N/A, {})		(N/A, {})	(N/A, {})	(N/A, {})	(3.26, {'1': '6.30%', '2': '15.83%', '3': '23.11%', '4': '54.76%'})	(N/A, {})	(N/A, {})	(N/A, {})	(N/A, {})	347	GOVERNANCE & POLITICAL SYSTEMS
(N/A, {})		(N/A, {})	(N/A, {})	(N/A, {})	(N/A, {})	(N/A, {})		(N/A, {})	(N/A, {})	(N/A, {})	(3.28, {'1': '5.52%', '2': '16.29%', '3': '23.23%', '4': '54.96%'})	(N/A, {})	(N/A, {})	(N/A, {})	(N/A, {})	348	GOVERNANCE & POLITICAL SYSTEMS
(N/A, {})		(N/A, {})	(N/A, {})	(N/A, {})	(N/A, {})	(N/A, {})		(N/A, {})	(N/A, {})	(N/A, {})	(3.13, {'1': '7.43%', '2': '20.06%', '3': '24.82%', '4': '47.69%'})	(N/A, {})	(N/A, {})	(N/A, {})	(N/A, {})	349	GOVERNANCE & POLITICAL SYSTEMS
(N/A, {})		(N/A, {})	(N/A, {})	(N/A, {})	(N/A, {})	(N/A, {})		(N/A, {})	(N/A, {})	(N/A, {})	(3.2, {'1': '5.80%', '2': '20.51%', '3': '21.64%', '4': '52.05%'})	(N/A, {})	(N/A, {})	(N/A, {})	(N/A, {})	350	GOVERNANCE & POLITICAL SYSTEMS
(N/A, {})		(N/A, {})	(N/A, {})	(N/A, {})	(N/A, {})	(N/A, {})		(N/A, {})	(N/A, {})	(N/A, {})	(3.38, {'1': '6.15%', '2': '12.17%', '3': '18.85%', '4': '62.83%'})	(N/A, {})	(N/A, {})	(N/A, {})	(N/A, {})	351	GOVERNANCE & POLITICAL SYSTEMS
(N/A, {})		(N/A, {})	(N/A, {})	(N/A, {})	(N/A, {})	(N/A, {})		(N/A, {})	(N/A, {})	(N/A, {})	(3.23, {'1': '7.36%', '2': '17.75%', '3': '19.62%', '4': '55.27%'})	(N/A, {})	(N/A, {})	(N/A, {})	(N/A, {})	352	GOVERNANCE & POLITICAL SYSTEMS
(N/A, {})		(N/A, {})	(N/A, {})	(N/A, {})	(N/A, {})	(N/A, {})		(N/A, {})	(N/A, {})	(N/A, {})	(2.92, {'1': '9.32%', '2': '29.19%', '3': '21.62%', '4': '39.86%'})	(N/A, {})	(N/A, {})	(N/A, {})	(N/A, {})	353	GOVERNANCE & POLITICAL SYSTEMS
(N/A, {})		(N/A, {})	(N/A, {})	(N/A, {})	(N/A, {})	(N/A, {})		(N/A, {})	(N/A, {})	(N/A, {})	(3.21, {'1': '6.10%', '2': '18.30%', '3': '23.83%', '4': '51.77%'})	(N/A, {})	(N/A, {})	(N/A, {})	(N/A, {})	354	GOVERNANCE & POLITICAL SYSTEMS
(N/A, {})		(N/A, {})	(N/A, {})	(N/A, {})	(N/A, {})	(N/A, {})		(N/A, {})	(N/A, {})	(N/A, {})	(2.71, {'1': '18.83%', '2': '26.53%', '3': '19.36%', '4': '35.28%'})	(N/A, {})	(N/A, {})	(N/A, {})	(N/A, {})	355	GOVERNANCE & POLITICAL SYSTEMS
(N/A, {})		(N/A, {})	(N/A, {})	(N/A, {})	(N/A, {})	(N/A, {})		(N/A, {})	(N/A, {})	(N/A, {})	(2.89, {'1': '12.17%', '2': '26.74%', '3': '21.12%', '4': '39.97%'})	(N/A, {})	(N/A, {})	(N/A, {})	(N/A, {})	356	GOVERNANCE & POLITICAL SYSTEMS
(N/A, {})		(N/A, {})	(N/A, {})	(N/A, {})	(N/A, {})	(N/A, {})		(N/A, {})	(N/A, {})	(N/A, {})	(3.06, {'1': '9.07%', '2': '21.29%', '3': '24.04%', '4': '45.60%'})	(N/A, {})	(N/A, {})	(N/A, {})	(N/A, {})	357	GOVERNANCE & POLITICAL SYSTEMS
(1.82, {'1': '36.89%', '2': '43.87%', '3': '19.25%'})		(2.37, {'1': '10.98%', '2': '41.17%', '3': '47.85%'})	(1.97, {'1': '17.19%', '2': '68.64%', '3': '14.17%'})	(2.44, {'1': '10.36%', '2': '35.43%', '3': '54.21%'})	(2.25, {'1': '14.87%', '2': '45.01%', '3': '40.12%'})	(1.92, {'1': '33.45%', '2': '40.81%', '3': '25.74%'})		(2.03, {'1': '21.89%', '2': '53.19%', '3': '24.91%'})	(1.63, {'1': '50.42%', '2': '36.27%', '3': '13.31%'})	(1.17, {'1': '87.16%', '2': '8.72%', '3': '4.12%'})	(2.05, {'1': '27.54%', '2': '40.41%', '3': '32.05%'})	(2.18, {'1': '11.25%', '2': '59.77%', '3': '28.98%'})	(1.53, {'1': '55.26%', '2': '36.16%', '3': '8.58%'})	(1.89, {'1': '37.52%', '2': '35.62%', '3': '26.86%'})	(1.33, {'1': '72.15%', '2': '22.32%', '3': '5.54%'})	358	GOVERNANCE & POLITICAL SYSTEMS
(1.99, {'1': '37.58%', '2': '33.40%', '3': '21.01%', '4': '8.01%'})		(1.28, {'1': '79.46%', '2': '14.79%', '3': '3.58%', '4': '2.17%'})	(1.41, {'1': '68.02%', '2': '25.00%', '3': '4.73%', '4': '2.25%'})	(1.2, {'1': '87.98%', '2': '6.95%', '3': '1.93%', '4': '3.14%'})	(1.41, {'1': '71.42%', '2': '20.31%', '3': '4.40%', '4': '3.87%'})	(2.29, {'1': '26.87%', '2': '31.38%', '3': '28.03%', '4': '13.71%'})		(1.24, {'1': '83.72%', '2': '11.38%', '3': '2.26%', '4': '2.64%'})	(2.0, {'1': '26.64%', '2': '49.76%', '3': '20.63%', '4': '2.98%'})	(3.01, {'1': '12.87%', '2': '19.51%', '3': '21.02%', '4': '46.60%'})	(1.54, {'1': '63.91%', '2': '23.10%', '3': '8.04%', '4': '4.95%'})	(1.6, {'1': '55.16%', '2': '32.43%', '3': '9.71%', '4': '2.70%'})	(2.39, {'1': '16.99%', '2': '40.86%', '3': '28.22%', '4': '13.94%'})	(1.75, {'1': '49.47%', '2': '30.77%', '3': '14.75%', '4': '5.00%'})	(3.03, {'1': '5.95%', '2': '23.38%', '3': '32.05%', '4': '38.62%'})	359	GOVERNANCE & POLITICAL SYSTEMS
(2.09, {'1': '32.60%', '2': '35.86%', '3': '21.43%', '4': '10.11%'})		(3.27, {'1': '5.16%', '2': '16.37%', '3': '24.60%', '4': '53.88%'})	(3.0, {'1': '6.98%', '2': '30.45%', '3': '17.87%', '4': '44.70%'})	(3.67, {'1': '1.13%', '2': '5.46%', '3': '18.56%', '4': '74.85%'})	(3.11, {'1': '4.85%', '2': '25.25%', '3': '23.82%', '4': '46.08%'})	(2.53, {'1': '19.43%', '2': '28.76%', '3': '31.67%', '4': '20.14%'})		(2.16, {'1': '34.99%', '2': '35.08%', '3': '8.83%', '4': '21.10%'})	(2.17, {'1': '18.66%', '2': '53.49%', '3': '20.52%', '4': '7.33%'})	(1.43, {'1': '72.93%', '2': '14.42%', '3': '8.91%', '4': '3.73%'})	(3.08, {'1': '6.08%', '2': '22.11%', '3': '29.62%', '4': '42.19%'})	(3.03, {'1': '3.86%', '2': '25.65%', '3': '33.77%', '4': '36.73%'})	(1.85, {'1': '35.92%', '2': '45.66%', '3': '15.86%', '4': '2.57%'})	(2.67, {'1': '12.74%', '2': '33.11%', '3': '28.89%', '4': '25.26%'})	(1.62, {'1': '55.56%', '2': '32.61%', '3': '6.20%', '4': '5.63%'})	360	GOVERNANCE & POLITICAL SYSTEMS
(2.1, {'1': '28.36%', '2': '41.06%', '3': '23.09%', '4': '7.49%'})		(3.2, {'1': '5.33%', '2': '19.94%', '3': '24.01%', '4': '50.71%'})	(2.8, {'1': '9.16%', '2': '36.26%', '3': '20.13%', '4': '34.45%'})	(3.1, {'1': '7.81%', '2': '20.48%', '3': '25.94%', '4': '45.78%'})	(3.13, {'1': '5.43%', '2': '22.51%', '3': '25.29%', '4': '46.77%'})	(2.38, {'1': '21.67%', '2': '33.35%', '3': '30.58%', '4': '14.40%'})		(2.86, {'1': '11.00%', '2': '34.10%', '3': '13.21%', '4': '41.69%'})	(1.92, {'1': '19.69%', '2': '70.22%', '3': '8.05%', '4': '2.04%'})	(1.32, {'1': '76.09%', '2': '18.70%', '3': '2.30%', '4': '2.91%'})	(2.73, {'1': '13.83%', '2': '27.84%', '3': '29.89%', '4': '28.43%'})	(2.87, {'1': '6.56%', '2': '29.12%', '3': '35.46%', '4': '28.86%'})	(1.79, {'1': '41.48%', '2': '41.53%', '3': '13.53%', '4': '3.47%'})	(2.42, {'1': '20.15%', '2': '34.24%', '3': '29.28%', '4': '16.32%'})	(1.6, {'1': '55.78%', '2': '30.56%', '3': '11.56%', '4': '2.10%'})	361	GOVERNANCE & POLITICAL SYSTEMS
(2.64, {'1': '13.01%', '2': '33.35%', '3': '30.11%', '4': '23.54%'})		(3.26, {'1': '4.52%', '2': '19.08%', '3': '21.80%', '4': '54.60%'})	(3.15, {'1': '3.59%', '2': '26.49%', '3': '21.19%', '4': '48.73%'})	(3.29, {'1': '5.52%', '2': '15.49%', '3': '23.68%', '4': '55.31%'})	(3.08, {'1': '4.74%', '2': '26.51%', '3': '24.37%', '4': '44.38%'})	(2.56, {'1': '15.60%', '2': '33.29%', '3': '30.21%', '4': '20.89%'})		(3.03, {'1': '8.41%', '2': '29.81%', '3': '11.85%', '4': '49.93%'})	(2.6, {'1': '2.59%', '2': '50.39%', '3': '31.62%', '4': '15.40%'})	(1.33, {'1': '74.73%', '2': '20.20%', '3': '2.51%', '4': '2.56%'})	(3.03, {'1': '8.01%', '2': '20.80%', '3': '31.25%', '4': '39.94%'})	(3.07, {'1': '3.97%', '2': '22.85%', '3': '35.03%', '4': '38.14%'})	(1.96, {'1': '35.47%', '2': '39.59%', '3': '18.71%', '4': '6.24%'})	(2.58, {'1': '14.42%', '2': '32.74%', '3': '32.79%', '4': '20.05%'})	(1.66, {'1': '51.65%', '2': '32.38%', '3': '13.89%', '4': '2.08%'})	362	GOVERNANCE & POLITICAL SYSTEMS
(1.71, {'1': '51.50%', '2': '30.40%', '3': '13.64%', '4': '4.46%'})		(2.69, {'1': '21.91%', '2': '23.73%', '3': '18.08%', '4': '36.28%'})	(1.94, {'1': '35.35%', '2': '44.53%', '3': '11.13%', '4': '8.98%'})	(2.24, {'1': '42.10%', '2': '16.69%', '3': '15.92%', '4': '25.29%'})	(2.48, {'1': '26.09%', '2': '29.55%', '3': '14.55%', '4': '29.82%'})	(2.29, {'1': '27.32%', '2': '31.83%', '3': '25.56%', '4': '15.29%'})		(2.36, {'1': '24.68%', '2': '39.96%', '3': '10.01%', '4': '25.35%'})	(1.86, {'1': '28.92%', '2': '58.35%', '3': '10.86%', '4': '1.87%'})	(1.42, {'1': '73.80%', '2': '16.13%', '3': '4.09%', '4': '5.98%'})	(2.33, {'1': '28.83%', '2': '28.96%', '3': '22.44%', '4': '19.77%'})	(2.46, {'1': '21.49%', '2': '33.16%', '3': '22.90%', '4': '22.45%'})	(1.77, {'1': '42.38%', '2': '40.54%', '3': '14.66%', '4': '2.43%'})	(2.31, {'1': '19.01%', '2': '44.12%', '3': '23.54%', '4': '13.34%'})	(1.35, {'1': '69.00%', '2': '26.81%', '3': '3.94%', '4': '0.25%'})	363	GOVERNANCE & POLITICAL SYSTEMS
(2.48, {'1': '10.47%', '2': '42.18%', '3': '36.25%', '4': '11.10%'})		(2.93, {'1': '6.32%', '2': '26.11%', '3': '35.69%', '4': '31.87%'})	(2.28, {'1': '16.20%', '2': '52.41%', '3': '18.43%', '4': '12.96%'})	(3.66, {'1': '0.38%', '2': '2.76%', '3': '26.96%', '4': '69.91%'})	(2.93, {'1': '4.33%', '2': '29.26%', '3': '35.58%', '4': '30.82%'})	(2.71, {'1': '10.15%', '2': '30.44%', '3': '37.79%', '4': '21.62%'})		(3.0, {'1': '5.62%', '2': '28.74%', '3': '26.12%', '4': '39.53%'})	(2.39, {'1': '1.90%', '2': '65.47%', '3': '24.33%', '4': '8.30%'})	(1.23, {'1': '81.00%', '2': '16.13%', '3': '1.85%', '4': '1.02%'})	(3.16, {'1': '4.49%', '2': '16.79%', '3': '37.05%', '4': '41.67%'})	(2.44, {'1': '8.92%', '2': '50.98%', '3': '27.32%', '4': '12.78%'})	(1.82, {'1': '37.86%', '2': '44.70%', '3': '15.10%', '4': '2.34%'})	(2.72, {'1': '4.41%', '2': '38.58%', '3': '37.82%', '4': '19.19%'})	(1.32, {'1': '71.88%', '2': '25.12%', '3': '2.50%', '4': '0.50%'})	364	GOVERNANCE & POLITICAL SYSTEMS
(2.0, {'0': '0.50%', '1': '23.24%', '2': '56.53%', '3': '15.08%', '4': '4.65%'})		(2.77, {'1': '9.73%', '2': '33.92%', '3': '25.56%', '4': '30.80%'})	(2.29, {'0': '0.64%', '1': '21.29%', '2': '42.65%', '3': '19.49%', '4': '15.93%'})	(3.4, {'0': '4.03%', '1': '0.63%', '2': '7.81%', '3': '26.32%', '4': '61.21%'})	(2.4, {'1': '15.82%', '2': '43.37%', '3': '25.68%', '4': '15.14%'})	(2.16, {'0': '3.52%', '1': '28.81%', '2': '30.06%', '3': '23.52%', '4': '14.09%'})		(2.82, {'0': '3.52%', '1': '7.42%', '2': '29.06%', '3': '23.52%', '4': '36.48%'})	(2.54, {'1': '3.72%', '2': '49.17%', '3': '36.40%', '4': '10.71%'})	(1.16, {'0': '2.30%', '1': '81.89%', '2': '14.06%', '3': '1.19%', '4': '0.55%'})	(2.58, {'0': '11.36%', '1': '9.34%', '2': '21.34%', '3': '26.14%', '4': '31.82%'})	(2.21, {'1': '23.20%', '2': '44.26%', '3': '21.31%', '4': '11.22%'})	(1.4, {'1': '67.83%', '2': '26.00%', '3': '4.67%', '4': '1.50%'})	(2.26, {'0': '8.04%', '1': '11.56%', '2': '38.44%', '3': '30.65%', '4': '11.31%'})	(1.12, {'1': '89.39%', '2': '9.60%', '3': '0.51%', '4': '0.51%'})	365	GOVERNANCE & POLITICAL SYSTEMS
(2.27, {'0': '4.51%', '1': '13.03%', '2': '44.36%', '3': '27.07%', '4': '11.03%'})		(2.78, {'1': '8.13%', '2': '34.63%', '3': '28.13%', '4': '29.13%'})	(1.9, {'0': '11.74%', '1': '24.52%', '2': '39.00%', '3': '11.29%', '4': '13.45%'})	(3.38, {'0': '3.38%', '1': '1.25%', '2': '7.64%', '3': '29.45%', '4': '58.27%'})	(2.85, {'1': '5.43%', '2': '29.88%', '3': '38.71%', '4': '25.98%'})	(2.25, {'0': '3.53%', '1': '25.09%', '2': '30.77%', '3': '23.83%', '4': '16.77%'})		(2.87, {'0': '4.79%', '1': '5.05%', '2': '28.11%', '3': '22.80%', '4': '39.25%'})	(2.13, {'1': '12.48%', '2': '68.05%', '3': '13.39%', '4': '6.09%'})	(1.21, {'0': '1.48%', '1': '79.48%', '2': '16.54%', '3': '1.85%', '4': '0.65%'})	(2.78, {'0': '12.64%', '1': '5.62%', '2': '12.39%', '3': '29.37%', '4': '39.97%'})	(1.81, {'0': '22.82%', '1': '14.38%', '2': '33.67%', '3': '17.15%', '4': '11.98%'})	(1.51, {'1': '63.17%', '2': '27.33%', '3': '4.67%', '4': '4.83%'})	(1.75, {'0': '40.10%', '1': '3.26%', '2': '14.79%', '3': '25.19%', '4': '16.67%'})	(1.22, {'1': '79.75%', '2': '18.99%', '3': '1.01%', '4': '0.25%'})	366	GOVERNANCE & POLITICAL SYSTEMS
(2.63, {'1': '4.72%', '2': '40.20%', '3': '42.31%', '4': '12.76%'})		(2.93, {'1': '6.81%', '2': '26.50%', '3': '33.38%', '4': '33.31%'})	(2.37, {'1': '16.03%', '2': '46.76%', '3': '21.57%', '4': '15.65%'})	(3.47, {'1': '0.38%', '2': '12.01%', '3': '27.97%', '4': '59.65%'})	(2.89, {'1': '4.74%', '2': '30.75%', '3': '35.40%', '4': '29.11%'})	(2.53, {'1': '13.02%', '2': '39.00%', '3': '30.28%', '4': '17.70%'})		(2.92, {'1': '5.44%', '2': '33.23%', '3': '25.61%', '4': '35.72%'})	(2.26, {'1': '6.44%', '2': '67.71%', '3': '19.28%', '4': '6.57%'})	(1.23, {'1': '80.19%', '2': '17.22%', '3': '1.76%', '4': '0.83%'})	(3.16, {'1': '2.96%', '2': '20.10%', '3': '34.73%', '4': '42.20%'})	(2.41, {'1': '11.72%', '2': '49.84%', '3': '24.32%', '4': '14.12%'})	(1.91, {'1': '33.39%', '2': '44.32%', '3': '20.12%', '4': '2.17%'})	(2.74, {'1': '4.22%', '2': '38.01%', '3': '37.44%', '4': '20.33%'})	(1.36, {'1': '65.96%', '2': '32.54%', '3': '1.38%', '4': '0.13%'})	367	GOVERNANCE & POLITICAL SYSTEMS
(2.86, {'1': '4.56%', '2': '29.53%', '3': '40.81%', '4': '25.10%'})		(3.41, {'1': '2.00%', '2': '9.99%', '3': '33.08%', '4': '54.93%'})	(3.28, {'1': '2.84%', '2': '15.32%', '3': '32.64%', '4': '49.20%'})	(3.8, {'1': '0.50%', '2': '0.75%', '3': '17.15%', '4': '81.60%'})	(3.22, {'1': '2.40%', '2': '15.58%', '3': '40.07%', '4': '41.95%'})	(2.8, {'1': '8.83%', '2': '29.58%', '3': '34.31%', '4': '27.27%'})		(3.49, {'1': '2.66%', '2': '10.27%', '3': '22.05%', '4': '65.02%'})	(3.27, {'2': '12.80%', '3': '47.64%', '4': '39.56%'})	(1.35, {'1': '71.80%', '2': '23.58%', '3': '2.89%', '4': '1.73%'})	(3.46, {'1': '2.45%', '2': '8.91%', '3': '28.55%', '4': '60.08%'})	(3.33, {'1': '1.27%', '2': '15.61%', '3': '32.11%', '4': '51.02%'})	(2.13, {'1': '19.43%', '2': '51.69%', '3': '25.34%', '4': '3.55%'})	(2.95, {'1': '2.89%', '2': '27.60%', '3': '40.65%', '4': '28.86%'})	(N/A, {})	368	GOVERNANCE & POLITICAL SYSTEMS
(2.79, {'1': '5.32%', '2': '31.05%', '3': '43.35%', '4': '20.28%'})		(3.52, {'1': '2.31%', '2': '6.88%', '3': '27.38%', '4': '63.44%'})	(3.46, {'1': '2.48%', '2': '10.67%', '3': '25.58%', '4': '61.26%'})	(3.78, {'1': '0.19%', '2': '1.13%', '3': '19.56%', '4': '79.12%'})	(3.23, {'1': '2.68%', '2': '17.49%', '3': '34.37%', '4': '45.45%'})	(2.69, {'1': '10.37%', '2': '33.25%', '3': '32.93%', '4': '23.45%'})		(3.47, {'1': '2.49%', '2': '11.61%', '3': '22.77%', '4': '63.14%'})	(2.99, {'1': '0.42%', '2': '27.45%', '3': '44.68%', '4': '27.45%'})	(1.41, {'1': '68.10%', '2': '24.86%', '3': '5.33%', '4': '1.71%'})	(3.4, {'1': '2.60%', '2': '10.06%', '3': '32.19%', '4': '55.16%'})	(3.37, {'1': '1.14%', '2': '14.71%', '3': '30.43%', '4': '53.72%'})	(2.13, {'1': '18.91%', '2': '53.97%', '3': '22.26%', '4': '4.85%'})	(2.92, {'1': '3.46%', '2': '27.53%', '3': '43.05%', '4': '25.96%'})	(N/A, {})	369	GOVERNANCE & POLITICAL SYSTEMS
(2.19, {'1': '21.09%', '2': '47.01%', '3': '23.76%', '4': '8.13%'})		(2.99, {'1': '6.75%', '2': '24.38%', '3': '31.88%', '4': '37.00%'})	(2.74, {'1': '5.35%', '2': '41.05%', '3': '27.85%', '4': '25.75%'})	(3.6, {'1': '0.25%', '2': '5.76%', '3': '27.94%', '4': '66.04%'})	(3.02, {'1': '2.90%', '2': '26.75%', '3': '35.95%', '4': '34.41%'})	(2.36, {'1': '19.77%', '2': '39.28%', '3': '25.67%', '4': '15.28%'})		(3.16, {'1': '3.78%', '2': '24.09%', '3': '24.21%', '4': '47.92%'})	(2.4, {'1': '2.32%', '2': '65.94%', '3': '20.85%', '4': '10.90%'})	(1.32, {'1': '72.69%', '2': '23.62%', '3': '2.68%', '4': '1.01%'})	(3.22, {'1': '2.86%', '2': '16.93%', '3': '35.29%', '4': '44.92%'})	(2.56, {'1': '4.43%', '2': '49.37%', '3': '32.28%', '4': '13.92%'})	(2.17, {'1': '27.00%', '2': '40.00%', '3': '22.17%', '4': '10.83%'})	(2.7, {'1': '5.68%', '2': '39.02%', '3': '34.72%', '4': '20.58%'})	(1.32, {'1': '74.81%', '2': '19.14%', '3': '5.29%', '4': '0.76%'})	370	GOVERNANCE & POLITICAL SYSTEMS
(2.39, {'1': '11.90%', '2': '45.59%', '3': '34.09%', '4': '8.42%'})		(3.17, {'1': '3.38%', '2': '17.40%', '3': '38.55%', '4': '40.68%'})	(2.87, {'1': '3.40%', '2': '34.76%', '3': '33.35%', '4': '28.48%'})	(3.58, {'1': '0.13%', '2': '4.08%', '3': '33.38%', '4': '62.42%'})	(3.12, {'1': '2.10%', '2': '22.20%', '3': '37.59%', '4': '38.11%'})	(2.46, {'1': '14.36%', '2': '39.19%', '3': '32.62%', '4': '13.83%'})		(3.2, {'1': '3.10%', '2': '19.65%', '3': '31.76%', '4': '45.49%'})	(3.11, {'1': '0.18%', '2': '21.16%', '3': '46.46%', '4': '32.19%'})	(1.32, {'1': '73.03%', '2': '22.79%', '3': '3.04%', '4': '1.14%'})	(3.24, {'1': '3.38%', '2': '12.84%', '3': '40.27%', '4': '43.51%'})	(2.86, {'1': '2.90%', '2': '28.85%', '3': '47.17%', '4': '21.08%'})	(1.93, {'1': '24.33%', '2': '59.90%', '3': '13.93%', '4': '1.85%'})	(2.74, {'1': '2.93%', '2': '40.05%', '3': '36.86%', '4': '20.15%'})	(1.37, {'1': '65.73%', '2': '31.71%', '3': '2.30%', '4': '0.26%'})	371	GOVERNANCE & POLITICAL SYSTEMS
(2.08, {'0': '1.00%', '1': '21.05%', '2': '52.13%', '3': '20.30%', '4': '5.51%'})		(3.06, {'1': '4.11%', '2': '23.69%', '3': '34.29%', '4': '37.91%'})	(1.82, {'1': '37.60%', '2': '47.70%', '3': '10.29%', '4': '4.41%'})	(3.55, {'0': '6.63%', '1': '0.25%', '2': '1.75%', '3': '14.64%', '4': '76.72%'})	(3.07, {'1': '3.57%', '2': '23.77%', '3': '34.63%', '4': '38.03%'})	(1.89, {'0': '3.52%', '1': '37.48%', '2': '34.97%', '3': '14.21%', '4': '9.81%'})		(2.6, {'1': '11.00%', '2': '43.99%', '3': '19.47%', '4': '25.54%'})	(2.04, {'1': '7.06%', '2': '84.16%', '3': '6.68%', '4': '2.10%'})	(1.24, {'0': '1.57%', '1': '76.78%', '2': '18.32%', '3': '2.31%', '4': '1.02%'})	(2.86, {'0': '10.66%', '1': '6.22%', '2': '11.80%', '3': '28.93%', '4': '42.39%'})	(2.36, {'0': '0.76%', '1': '17.53%', '2': '40.48%', '3': '27.62%', '4': '13.62%'})	(1.44, {'1': '68.67%', '2': '22.00%', '3': '5.50%', '4': '3.83%'})	(2.24, {'0': '11.54%', '1': '9.91%', '2': '35.38%', '3': '29.61%', '4': '13.55%'})	(1.08, {'1': '92.44%', '2': '7.05%', '3': '0.25%', '4': '0.25%'})	372	GOVERNANCE & POLITICAL SYSTEMS
(2.98, {'1': '3.70%', '2': '25.54%', '3': '40.10%', '4': '30.65%'})		(3.37, {'1': '2.38%', '2': '9.51%', '3': '36.92%', '4': '51.19%'})	(3.49, {'1': '1.40%', '2': '7.85%', '3': '31.23%', '4': '59.52%'})	(3.83, {'2': '1.01%', '3': '14.57%', '4': '84.42%'})	(3.26, {'1': '2.56%', '2': '13.50%', '3': '38.80%', '4': '45.13%'})	(2.9, {'1': '8.25%', '2': '24.10%', '3': '37.24%', '4': '30.41%'})		(3.59, {'1': '2.78%', '2': '6.46%', '3': '20.13%', '4': '70.63%'})	(3.33, {'1': '0.10%', '2': '12.43%', '3': '41.55%', '4': '45.92%'})	(1.51, {'1': '61.17%', '2': '29.55%', '3': '6.34%', '4': '2.94%'})	(3.58, {'1': '0.66%', '2': '6.55%', '3': '26.61%', '4': '66.19%'})	(3.39, {'1': '1.40%', '2': '13.72%', '3': '28.97%', '4': '55.91%'})	(2.31, {'1': '13.90%', '2': '52.60%', '3': '21.94%', '4': '11.56%'})	(3.03, {'1': '2.02%', '2': '28.25%', '3': '34.43%', '4': '35.31%'})	(1.75, {'1': '46.92%', '2': '34.10%', '3': '16.15%', '4': '2.82%'})	373	GOVERNANCE & POLITICAL SYSTEMS
(2.63, {'1': '5.51%', '2': '43.66%', '3': '32.78%', '4': '18.05%'})		(2.85, {'1': '6.02%', '2': '30.33%', '3': '35.84%', '4': '27.82%'})	(2.23, {'1': '17.67%', '2': '52.53%', '3': '18.52%', '4': '11.28%'})	(3.6, {'1': '0.38%', '2': '5.53%', '3': '28.05%', '4': '66.04%'})	(2.92, {'1': '4.10%', '2': '27.35%', '3': '40.68%', '4': '27.86%'})	(2.47, {'1': '14.30%', '2': '40.72%', '3': '28.35%', '4': '16.62%'})		(2.83, {'1': '6.31%', '2': '37.11%', '3': '24.10%', '4': '32.47%'})	(2.48, {'1': '1.41%', '2': '57.96%', '3': '31.47%', '4': '9.16%'})	(1.33, {'1': '72.20%', '2': '24.03%', '3': '2.73%', '4': '1.04%'})	(3.0, {'1': '4.19%', '2': '28.18%', '3': '31.32%', '4': '36.30%'})	(2.32, {'1': '10.98%', '2': '54.55%', '3': '25.63%', '4': '8.84%'})	(2.08, {'1': '22.41%', '2': '52.07%', '3': '20.69%', '4': '4.83%'})	(2.77, {'1': '3.96%', '2': '34.87%', '3': '41.25%', '4': '19.92%'})	(1.26, {'1': '74.24%', '2': '25.51%', '3': '0.25%'})	374	GOVERNANCE & POLITICAL SYSTEMS
(1.97, {'1': '29.30%', '2': '48.15%', '3': '18.73%', '4': '3.82%'})		(2.74, {'1': '11.63%', '2': '33.75%', '3': '23.88%', '4': '30.75%'})	(1.87, {'1': '32.85%', '2': '52.19%', '3': '10.21%', '4': '4.76%'})	(3.48, {'1': '0.50%', '2': '11.00%', '3': '28.62%', '4': '59.88%'})	(3.02, {'1': '3.94%', '2': '25.34%', '3': '35.45%', '4': '35.27%'})	(2.13, {'1': '29.86%', '2': '39.11%', '3': '19.56%', '4': '11.47%'})		(2.67, {'1': '8.11%', '2': '44.11%', '3': '20.79%', '4': '27.00%'})	(1.98, {'1': '9.35%', '2': '85.02%', '3': '4.37%', '4': '1.25%'})	(1.16, {'1': '86.62%', '2': '11.62%', '3': '1.29%', '4': '0.46%'})	(3.23, {'1': '2.34%', '2': '17.17%', '3': '35.89%', '4': '44.60%'})	(2.57, {'1': '9.09%', '2': '42.55%', '3': '30.81%', '4': '17.55%'})	(1.64, {'1': '50.75%', '2': '37.40%', '3': '8.85%', '4': '3.01%'})	(2.27, {'1': '14.23%', '2': '53.53%', '3': '23.17%', '4': '9.07%'})	(1.17, {'1': '83.63%', '2': '16.12%', '3': '0.25%'})	375	GOVERNANCE & POLITICAL SYSTEMS
(1.53, {'1': '55.21%', '2': '42.21%', '5': '2.58%'})		(1.86, {'1': '21.00%', '2': '76.63%', '5': '2.38%'})	(1.55, {'1': '47.03%', '2': '52.32%', '5': '0.65%'})	(1.99, {'1': '8.14%', '2': '89.58%', '5': '2.27%'})	(1.85, {'1': '21.26%', '2': '76.64%', '5': '2.10%'})	(1.8, {'1': '48.33%', '2': '42.19%', '5': '9.47%'})		(1.76, {'1': '27.52%', '2': '71.34%', '5': '1.14%'})	(1.1, {'1': '89.75%', '2': '10.25%'})	(1.18, {'1': '91.02%', '2': '6.04%', '5': '2.94%'})	(1.61, {'1': '49.48%', '2': '47.13%', '5': '3.39%'})	(1.75, {'1': '34.62%', '2': '62.08%', '5': '3.30%'})	(1.2, {'1': '88.72%', '2': '8.35%', '5': '2.92%'})	(1.63, {'1': '49.40%', '2': '46.45%', '5': '4.15%'})	(1.13, {'1': '92.19%', '2': '5.92%', '5': '1.89%'})	376	GOVERNANCE & POLITICAL SYSTEMS
(1.37, {'1': '69.87%', '2': '27.86%', '5': '2.26%'})		(1.86, {'1': '20.53%', '2': '77.35%', '5': '2.13%'})	(1.53, {'1': '49.60%', '2': '49.55%', '5': '0.85%'})	(1.96, {'1': '12.39%', '2': '84.91%', '5': '2.70%'})	(1.82, {'1': '22.02%', '2': '76.67%', '5': '1.32%'})	(1.61, {'1': '61.44%', '2': '31.17%', '5': '7.39%'})		(1.69, {'1': '32.71%', '2': '66.71%', '5': '0.58%'})	(1.12, {'1': '88.90%', '2': '10.65%', '5': '0.45%'})	(N/A, {})	(1.74, {'1': '42.59%', '2': '51.77%', '5': '5.64%'})	(N/A, {})	(1.22, {'1': '81.04%', '2': '17.79%', '5': '1.17%'})	(1.34, {'1': '74.84%', '2': '22.33%', '5': '2.83%'})	(N/A, {})	377	GOVERNANCE & POLITICAL SYSTEMS
(3.08, {'1': '10.62%', '2': '20.59%', '3': '19.09%', '4': '49.71%'})		(2.14, {'1': '39.31%', '2': '27.32%', '3': '13.69%', '4': '19.68%'})	(2.41, {'1': '24.31%', '2': '31.80%', '3': '22.28%', '4': '21.61%'})	(1.9, {'1': '51.73%', '2': '22.41%', '3': '10.49%', '4': '15.37%'})	(1.84, {'1': '45.63%', '2': '34.61%', '3': '10.02%', '4': '9.74%'})	(2.73, {'1': '17.19%', '2': '23.65%', '3': '28.59%', '4': '30.57%'})		(2.03, {'1': '43.58%', '2': '28.61%', '3': '8.56%', '4': '19.25%'})	(3.15, {'1': '11.31%', '2': '15.73%', '3': '19.91%', '4': '53.05%'})	(3.3, {'1': '8.50%', '2': '16.38%', '3': '11.29%', '4': '63.83%'})	(2.48, {'1': '27.16%', '2': '23.41%', '3': '23.49%', '4': '25.94%'})	(2.82, {'1': '15.86%', '2': '25.76%', '3': '19.25%', '4': '39.13%'})	(3.1, {'1': '7.49%', '2': '25.11%', '3': '17.62%', '4': '49.79%'})	(3.37, {'1': '6.19%', '2': '15.00%', '3': '14.04%', '4': '64.77%'})	(N/A, {})	378	GOVERNANCE & POLITICAL SYSTEMS
(1, {'1': '51.63%', '2': '9.40%', '3': '18.05%', '4': '2.88%', '6': '7.39%', '7': '0.63%', '8': '1.25%', '9': '1.75%', '11': '1.88%', '12': '2.88%', '13': '2.26%'})		(1, {'1': '53.00%', '2': '8.25%', '3': '13.25%', '4': '2.88%', '5': '2.00%', '6': '3.50%', '7': '0.75%', '8': '2.38%', '9': '5.63%', '10': '0.25%', '11': '4.38%', '13': '3.75%'})	(1, {'1': '58.04%', '2': '14.97%', '3': '6.81%', '4': '6.04%', '6': '1.57%', '7': '0.46%', '8': '0.55%', '9': '3.16%', '11': '1.28%', '13': '7.11%'})	(1, {'1': '52.39%', '2': '8.69%', '3': '13.35%', '5': '9.32%', '6': '9.57%', '7': '0.88%', '8': '0.76%', '9': '0.88%', '10': '1.01%', '11': '2.64%', '13': '0.50%'})	(1, {'1': '64.33%', '2': '7.39%', '3': '15.34%', '4': '1.85%', '6': '1.48%', '7': '1.11%', '8': '0.55%', '9': '2.22%', '11': '2.03%', '13': '3.70%'})	(1, {'1': '33.51%', '2': '10.19%', '3': '8.58%', '4': '6.03%', '6': '11.80%', '7': '4.02%', '8': '6.30%', '9': '9.25%', '11': '6.70%', '13': '3.62%'})		(1, {'1': '68.53%', '2': '7.30%', '3': '4.25%', '6': '2.26%', '8': '0.93%', '9': '2.52%', '11': '2.52%', '12': '9.56%', '13': '2.12%'})	(1, {'1': '39.65%', '2': '14.00%', '3': '10.91%', '4': '3.31%', '6': '10.40%', '7': '0.73%', '8': '1.18%', '9': '18.32%', '12': '1.25%', '13': '0.25%'})	(1, {'1': '71.97%', '2': '3.80%', '3': '12.59%', '4': '1.19%', '6': '0.48%', '8': '0.48%', '9': '3.33%', '10': '2.61%', '11': '1.43%', '13': '2.14%'})	(1, {'1': '52.37%', '2': '12.63%', '3': '23.03%', '4': '1.45%', '5': '1.18%', '6': '1.58%', '7': '1.18%', '8': '0.39%', '9': '2.37%', '10': '0.13%', '11': '1.58%', '13': '2.11%'})	(1, {'1': '68.18%', '2': '6.92%', '3': '7.92%', '4': '0.63%', '6': '3.65%', '7': '0.38%', '8': '0.38%', '9': '2.26%', '10': '1.64%', '11': '0.50%', '13': '7.55%'})	(1, {'1': '58.79%', '2': '15.58%', '3': '13.90%', '4': '3.85%', '5': '1.51%', '6': '1.17%', '7': '0.50%', '8': '0.17%', '9': '2.18%', '11': '1.84%', '13': '0.50%'})	(1, {'1': '49.94%', '2': '12.08%', '3': '10.57%', '4': '3.40%', '6': '4.15%', '7': '0.75%', '8': '1.01%', '9': '2.77%', '11': '3.14%', '12': '1.76%', '13': '10.44%'})	(1, {'1': '86.77%', '2': '1.78%', '3': '5.09%', '4': '1.02%', '6': '0.25%', '8': '0.25%', '9': '2.54%', '11': '0.51%', '13': '1.78%'})	379	GOVERNANCE & POLITICAL SYSTEMS
(3, {'1': '12.24%', '2': '5.99%', '3': '16.67%', '4': '3.65%', '6': '12.76%', '7': '1.56%', '8': '3.52%', '9': '16.54%', '11': '6.51%', '12': '12.63%', '13': '7.94%'})		(9, {'1': '17.49%', '2': '4.40%', '3': '20.60%', '4': '6.74%', '5': '2.98%', '6': '6.87%', '7': '2.72%', '8': '3.11%', '9': '22.15%', '11': '7.25%', '13': '5.70%'})	(3, {'1': '16.11%', '2': '6.07%', '3': '19.29%', '4': '13.69%', '6': '2.62%', '7': '3.09%', '8': '2.90%', '9': '17.17%', '11': '4.70%', '13': '14.37%'})	(3, {'1': '9.74%', '2': '6.36%', '3': '29.09%', '5': '14.34%', '6': '13.80%', '7': '2.44%', '8': '3.52%', '9': '7.44%', '10': '1.49%', '11': '8.80%', '13': '2.98%'})	(3, {'1': '12.28%', '2': '10.78%', '3': '31.68%', '4': '4.96%', '6': '9.91%', '7': '4.31%', '8': '1.29%', '9': '11.42%', '11': '3.88%', '13': '9.48%'})	(1, {'1': '16.61%', '2': '11.31%', '3': '9.36%', '4': '7.24%', '6': '10.78%', '7': '4.59%', '8': '7.77%', '9': '15.37%', '10': '0.53%', '11': '11.66%', '13': '4.77%'})		(9, {'1': '12.16%', '2': '5.98%', '3': '16.41%', '6': '8.30%', '8': '4.25%', '9': '22.39%', '11': '12.36%', '12': '12.16%', '13': '5.98%'})	(9, {'1': '11.73%', '2': '7.87%', '3': '14.42%', '4': '6.52%', '6': '15.72%', '7': '1.36%', '8': '7.17%', '9': '25.34%', '11': '2.12%', '12': '7.43%', '13': '0.32%'})	(9, {'1': '19.69%', '2': '16.60%', '3': '18.15%', '4': '3.47%', '6': '2.32%', '7': '0.39%', '8': '0.39%', '9': '23.17%', '10': '5.41%', '11': '5.41%', '13': '5.02%'})	(9, {'1': '10.12%', '2': '8.36%', '3': '23.02%', '4': '3.81%', '5': '1.76%', '6': '5.87%', '7': '2.20%', '8': '2.05%', '9': '25.07%', '10': '2.20%', '11': '5.72%', '13': '9.82%'})	(13, {'1': '16.37%', '2': '5.68%', '3': '17.59%', '4': '2.57%', '6': '9.47%', '7': '3.25%', '8': '1.62%', '9': '14.48%', '10': '4.06%', '11': '5.41%', '13': '19.49%'})	(3, {'1': '15.16%', '2': '12.44%', '3': '24.02%', '4': '4.94%', '5': '4.09%', '6': '10.05%', '7': '2.04%', '8': '2.73%', '9': '16.35%', '11': '3.75%', '13': '4.43%'})	(3, {'1': '14.19%', '2': '8.03%', '3': '18.07%', '4': '10.04%', '6': '11.78%', '7': '2.28%', '8': '2.54%', '9': '12.32%', '11': '5.22%', '12': '3.88%', '13': '11.65%'})	(9, {'1': '7.56%', '2': '2.03%', '3': '16.86%', '4': '5.52%', '5': '0.87%', '6': '3.49%', '7': '1.16%', '8': '1.74%', '9': '41.86%', '10': '1.45%', '11': '6.10%', '13': '11.34%'})	380	GOVERNANCE & POLITICAL SYSTEMS
(1, {'1': '28.41%', '2': '5.51%', '3': '9.51%', '4': '9.14%', '5': '15.27%', '6': '1.13%', '7': '1.63%', '8': '2.63%', '9': '13.02%', '10': '4.88%', '13': '2.00%', '21': '6.88%'})		(1, {'1': '20.58%', '2': '20.33%', '3': '14.68%', '4': '15.06%', '5': '7.28%', '6': '2.13%', '7': '0.63%', '8': '1.63%', '9': '0.50%', '10': '0.25%', '21': '16.94%'})	(1, {'1': '24.95%', '2': '7.17%', '3': '4.87%', '4': '17.22%', '5': '9.79%', '6': '0.34%', '7': '0.62%', '8': '9.24%', '9': '11.31%', '10': '2.01%', '21': '12.47%'})	(1, {'1': '27.20%', '2': '5.42%', '3': '11.08%', '4': '7.93%', '5': '17.38%', '6': '0.76%', '7': '1.26%', '8': '4.91%', '9': '14.23%', '10': '1.64%', '21': '8.19%'})	(1, {'1': '17.77%', '2': '10.42%', '3': '10.29%', '4': '15.07%', '5': '15.07%', '6': '5.76%', '7': '2.08%', '8': '3.68%', '9': '6.86%', '10': '1.10%', '21': '11.89%'})	(5, {'1': '15.42%', '2': '8.48%', '3': '3.98%', '4': '12.85%', '5': '15.55%', '6': '3.47%', '7': '3.86%', '8': '5.53%', '9': '12.60%', '10': '3.47%', '12': '2.96%', '13': '1.93%', '21': '9.90%'})		(1, {'1': '21.36%', '2': '4.48%', '3': '6.65%', '4': '17.77%', '5': '20.20%', '6': '2.43%', '7': '0.77%', '8': '5.63%', '9': '9.08%', '10': '7.29%', '13': '1.79%', '21': '2.56%'})	(9, {'1': '15.59%', '2': '6.17%', '3': '0.57%', '4': '9.03%', '5': '13.10%', '6': '5.12%', '7': '2.71%', '8': '9.02%', '9': '15.96%', '10': '14.29%', '13': '5.88%', '21': '2.55%'})	(8, {'1': '6.03%', '2': '4.22%', '3': '6.64%', '4': '14.63%', '5': '9.80%', '6': '2.56%', '7': '3.32%', '8': '27.60%', '9': '7.24%', '10': '2.87%', '12': '8.30%', '13': '0.15%', '21': '6.64%'})	(1, {'1': '35.39%', '2': '7.11%', '3': '4.08%', '4': '18.03%', '5': '9.21%', '6': '1.05%', '7': '1.45%', '8': '2.89%', '9': '7.11%', '10': '4.61%', '14': '0.66%', '21': '8.42%'})	(1, {'1': '30.44%', '2': '12.70%', '4': '9.94%', '5': '13.46%', '6': '1.51%', '7': '0.50%', '8': '9.56%', '9': '9.81%', '10': '0.75%', '15': '0.88%', '21': '10.44%'})	(1, {'1': '43.65%', '2': '13.21%', '3': '6.69%', '4': '11.37%', '5': '5.85%', '6': '2.34%', '7': '0.17%', '8': '2.17%', '9': '1.51%', '10': '1.34%', '21': '11.71%'})	(1, {'1': '36.22%', '2': '13.53%', '3': '4.51%', '4': '8.90%', '5': '7.14%', '6': '0.88%', '7': '0.50%', '8': '4.26%', '9': '12.78%', '10': '2.88%', '11': '2.01%', '21': '6.39%'})	(1, {'1': '50.12%', '2': '4.99%', '3': '1.75%', '4': '18.45%', '5': '6.48%', '6': '1.50%', '7': '0.50%', '8': '3.99%', '9': '4.49%', '10': '0.25%', '21': '7.48%'})	381	GOVERNANCE & POLITICAL SYSTEMS
(5, {'1': '7.92%', '2': '4.78%', '3': '4.40%', '4': '10.06%', '5': '24.40%', '6': '2.64%', '7': '5.28%', '8': '8.43%', '9': '18.24%', '10': '7.04%', '13': '2.52%', '21': '4.28%'})		(4, {'2': '4.48%', '3': '11.86%', '4': '21.61%', '5': '19.89%', '6': '7.38%', '7': '4.74%', '8': '14.36%', '9': '4.87%', '10': '0.79%', '21': '10.01%'})	(5, {'1': '13.72%', '2': '8.14%', '3': '5.21%', '4': '15.17%', '5': '19.66%', '6': '0.71%', '7': '2.32%', '8': '8.84%', '9': '13.32%', '10': '1.65%', '21': '11.25%'})	(5, {'1': '9.86%', '2': '4.42%', '3': '8.22%', '4': '13.27%', '5': '24.27%', '6': '3.03%', '7': '3.03%', '8': '5.44%', '9': '16.94%', '10': '2.91%', '21': '8.60%'})	(5, {'1': '4.82%', '2': '8.09%', '3': '10.98%', '4': '21.19%', '5': '21.77%', '6': '5.97%', '7': '1.93%', '8': '5.20%', '9': '5.78%', '10': '0.77%', '21': '13.49%'})	(5, {'1': '7.13%', '2': '6.13%', '3': '2.71%', '4': '8.42%', '5': '16.98%', '6': '5.14%', '7': '5.71%', '8': '12.27%', '9': '14.12%', '10': '4.71%', '12': '4.71%', '13': '3.71%', '21': '8.27%'})		(5, {'1': '6.39%', '2': '3.99%', '3': '11.05%', '4': '19.57%', '5': '27.03%', '6': '6.66%', '7': '2.13%', '8': '7.06%', '9': '7.19%', '10': '4.66%', '13': '1.73%', '21': '2.53%'})	(2, {'1': '18.61%', '2': '18.68%', '3': '1.21%', '4': '8.28%', '5': '11.41%', '6': '2.11%', '7': '1.47%', '8': '6.19%', '9': '12.90%', '10': '9.53%', '13': '3.22%', '21': '6.40%'})	(4, {'1': '10.00%', '2': '2.00%', '3': '7.00%', '4': '19.50%', '5': '18.75%', '6': '5.50%', '7': '4.75%', '8': '8.25%', '9': '6.75%', '10': '7.00%', '21': '10.50%'})	(5, {'1': '11.02%', '2': '6.18%', '3': '6.18%', '4': '16.67%', '5': '18.41%', '6': '3.36%', '7': '3.76%', '8': '6.05%', '9': '11.56%', '10': '4.17%', '14': '1.75%', '21': '10.89%'})	(5, {'1': '11.74%', '2': '9.72%', '4': '15.28%', '5': '19.07%', '6': '2.40%', '7': '2.02%', '8': '12.12%', '9': '13.89%', '10': '2.15%', '15': '0.38%', '21': '11.24%'})	(4, {'1': '8.38%', '2': '10.55%', '3': '10.22%', '4': '20.44%', '5': '16.92%', '6': '5.70%', '7': '1.68%', '8': '4.86%', '9': '3.52%', '10': '2.85%', '21': '14.91%'})	(5, {'1': '7.67%', '2': '7.67%', '3': '7.17%', '4': '14.47%', '5': '18.99%', '6': '2.14%', '7': '3.65%', '8': '8.55%', '9': '10.69%', '10': '4.78%', '11': '4.03%', '21': '10.19%'})	(4, {'1': '5.21%', '2': '2.86%', '3': '3.91%', '4': '26.56%', '5': '21.09%', '6': '2.60%', '7': '0.52%', '8': '7.29%', '9': '9.64%', '10': '5.47%', '21': '14.84%'})	382	GOVERNANCE & POLITICAL SYSTEMS
(9, {'1': '11.10%', '2': '4.97%', '3': '6.12%', '4': '9.69%', '5': '11.48%', '6': '3.70%', '7': '5.61%', '8': '9.57%', '9': '22.58%', '10': '5.99%', '13': '3.95%', '21': '5.23%'})		(9, {'1': '0.69%', '3': '1.94%', '4': '5.42%', '5': '12.78%', '6': '5.83%', '7': '4.72%', '8': '19.17%', '9': '25.00%', '10': '23.06%', '21': '1.39%'})	(9, {'1': '11.52%', '2': '6.18%', '3': '4.98%', '4': '12.01%', '5': '16.10%', '6': '1.86%', '7': '2.60%', '8': '13.42%', '9': '17.71%', '10': '4.40%', '21': '9.23%'})	(5, {'1': '9.78%', '2': '3.78%', '3': '6.78%', '4': '10.82%', '5': '17.21%', '6': '4.82%', '7': '7.95%', '8': '10.04%', '9': '17.08%', '10': '4.30%', '21': '7.43%'})	(4, {'1': '11.48%', '2': '4.92%', '3': '5.74%', '4': '15.57%', '5': '15.57%', '6': '15.57%', '7': '6.56%', '8': '2.46%', '9': '13.11%', '10': '0.82%', '21': '8.20%'})	(9, {'1': '7.14%', '2': '4.76%', '3': '3.57%', '4': '9.52%', '5': '14.12%', '6': '4.93%', '7': '5.78%', '8': '12.93%', '9': '17.18%', '10': '6.63%', '12': '3.40%', '13': '5.27%', '21': '4.76%'})		(5, {'1': '11.48%', '2': '5.81%', '3': '8.28%', '4': '14.39%', '5': '15.26%', '6': '8.58%', '7': '3.92%', '8': '9.88%', '9': '10.17%', '10': '7.99%', '13': '1.89%', '21': '2.33%'})	(9, {'1': '10.87%', '2': '10.15%', '3': '2.80%', '4': '9.71%', '5': '11.85%', '6': '2.12%', '7': '3.39%', '8': '12.07%', '9': '13.70%', '10': '7.97%', '13': '4.02%', '21': '11.35%'})	(4, {'1': '5.67%', '2': '7.00%', '3': '11.00%', '4': '16.33%', '5': '13.67%', '6': '4.33%', '7': '3.00%', '8': '9.33%', '9': '13.00%', '10': '5.67%', '21': '11.00%'})	(5, {'1': '10.50%', '2': '4.82%', '3': '4.40%', '4': '11.63%', '5': '16.60%', '6': '4.26%', '7': '4.40%', '8': '8.09%', '9': '12.48%', '10': '7.23%', '14': '7.66%', '15': '0.99%', '21': '6.95%'})	(9, {'1': '12.43%', '2': '8.86%', '4': '11.77%', '5': '16.80%', '6': '1.19%', '7': '2.91%', '8': '15.61%', '9': '17.33%', '10': '3.31%', '15': '1.46%', '21': '8.33%'})	(5, {'1': '12.84%', '2': '8.11%', '3': '7.94%', '4': '11.99%', '5': '14.36%', '6': '8.78%', '7': '1.52%', '8': '7.60%', '9': '10.14%', '10': '5.24%', '21': '11.49%'})	(9, {'1': '9.15%', '2': '6.99%', '3': '6.73%', '4': '13.72%', '5': '11.18%', '6': '3.30%', '7': '4.70%', '8': '8.51%', '9': '14.49%', '10': '8.13%', '11': '4.70%', '21': '8.39%'})	(5, {'1': '4.53%', '2': '3.47%', '3': '6.93%', '4': '8.00%', '5': '24.53%', '6': '4.27%', '7': '1.60%', '8': '10.93%', '9': '20.80%', '10': '7.73%', '21': '7.20%'})	383	GOVERNANCE & POLITICAL SYSTEMS
(1, {'1': '61.50%', '2': '36.79%', '3': '1.71%'})		(1, {'1': '75.38%', '2': '22.83%', '3': '1.79%'})	(1, {'1': '75.81%', '2': '23.27%', '3': '0.92%'})	(1, {'1': '79.57%', '2': '17.99%', '3': '2.43%'})	(1, {'1': '67.81%', '2': '30.33%', '3': '1.86%'})	(1, {'1': '53.82%', '2': '39.27%', '3': '6.91%'})		(1, {'1': '61.12%', '2': '38.07%', '3': '0.82%'})	(1, {'1': '52.17%', '2': '47.56%', '3': '0.27%'})	(2, {'1': '20.39%', '2': '65.13%', '3': '14.47%'})	(1, {'1': '72.53%', '2': '24.68%', '3': '2.79%'})	(1, {'1': '81.05%', '2': '16.75%', '3': '2.20%'})	(1, {'1': '57.91%', '2': '38.47%', '3': '3.62%'})	(1, {'1': '63.05%', '2': '34.10%', '3': '2.85%'})	(2, {'1': '14.49%', '2': '84.57%', '3': '0.94%'})	384	GOVERNANCE & POLITICAL SYSTEMS
(1.87, {'1': '39.77%', '2': '33.54%', '3': '26.69%'})		(1.96, {'1': '39.67%', '2': '25.12%', '3': '35.21%'})	(1.82, {'1': '46.20%', '2': '25.52%', '3': '28.28%'})	(1.56, {'1': '60.90%', '2': '22.26%', '3': '16.84%'})	(2.03, {'1': '33.66%', '2': '29.22%', '3': '37.12%'})	(1.98, {'1': '33.40%', '2': '34.80%', '3': '31.80%'})		(2.19, {'1': '25.79%', '2': '29.77%', '3': '44.45%'})	(1.82, {'1': '44.77%', '2': '28.70%', '3': '26.54%'})	(1.9, {'1': '38.71%', '2': '32.26%', '3': '29.03%'})	(1.96, {'1': '36.95%', '2': '29.83%', '3': '33.21%'})	(1.87, {'1': '41.69%', '2': '29.97%', '3': '28.34%'})	(1.82, {'1': '36.72%', '2': '44.80%', '3': '18.48%'})	(1.68, {'1': '50.07%', '2': '31.50%', '3': '18.43%'})	(1.42, {'1': '72.06%', '2': '14.27%', '3': '13.67%'})	385	GOVERNANCE & POLITICAL SYSTEMS
(1.28, {'1': '78.52%', '2': '15.95%', '3': '4.40%', '4': '1.13%'})		(1.35, {'1': '76.81%', '2': '15.96%', '3': '2.74%', '4': '4.49%'})	(1.21, {'1': '84.28%', '2': '11.28%', '3': '3.15%', '4': '1.29%'})	(1.22, {'1': '87.15%', '2': '7.18%', '3': '2.64%', '4': '3.02%'})	(1.25, {'1': '84.01%', '2': '10.30%', '3': '1.95%', '4': '3.73%'})	(1.78, {'1': '50.45%', '2': '29.45%', '3': '11.40%', '4': '8.71%'})		(1.42, {'1': '77.22%', '2': '11.77%', '3': '3.16%', '4': '7.85%'})	(1.03, {'1': '96.54%', '2': '3.46%'})	(1.25, {'1': '77.72%', '2': '20.10%', '3': '1.94%', '4': '0.24%'})	(1.48, {'1': '71.58%', '2': '15.92%', '3': '5.66%', '4': '6.84%'})	(1.29, {'1': '78.28%', '2': '16.67%', '3': '3.03%', '4': '2.02%'})	(1.4, {'1': '68.39%', '2': '23.75%', '3': '6.86%', '4': '1.00%'})	(1.37, {'1': '71.91%', '2': '21.79%', '3': '3.90%', '4': '2.39%'})	(1.08, {'1': '92.29%', '2': '7.71%'})	386	GOVERNANCE & POLITICAL SYSTEMS
(1.61, {'1': '60.00%', '2': '23.52%', '3': '12.20%', '4': '4.28%'})		(1.3, {'1': '78.80%', '2': '15.09%', '3': '2.99%', '4': '3.12%'})	(1.37, {'1': '77.03%', '2': '13.35%', '3': '5.02%', '4': '4.60%'})	(1.21, {'1': '87.95%', '2': '7.03%', '3': '1.00%', '4': '4.02%'})	(1.2, {'1': '86.92%', '2': '7.92%', '3': '3.27%', '4': '1.89%'})	(1.84, {'1': '46.55%', '2': '31.24%', '3': '13.68%', '4': '8.53%'})		(1.41, {'1': '79.87%', '2': '7.92%', '3': '3.90%', '4': '8.30%'})	(1.05, {'1': '94.53%', '2': '5.47%'})	(1.3, {'1': '75.89%', '2': '18.62%', '3': '5.25%', '4': '0.24%'})	(1.57, {'1': '68.22%', '2': '16.54%', '3': '5.56%', '4': '9.69%'})	(1.32, {'1': '78.36%', '2': '14.34%', '3': '4.53%', '4': '2.77%'})	(1.62, {'1': '55.76%', '2': '29.22%', '3': '12.02%', '4': '3.01%'})	(1.4, {'1': '69.97%', '2': '22.24%', '3': '5.53%', '4': '2.26%'})	(1.09, {'1': '91.58%', '2': '7.91%', '3': '0.26%', '4': '0.26%'})	387	GOVERNANCE & POLITICAL SYSTEMS
(1.47, {'1': '69.92%', '2': '17.29%', '3': '8.52%', '4': '4.26%'})		(1.21, {'1': '84.29%', '2': '12.72%', '3': '1.00%', '4': '2.00%'})	(1.17, {'1': '86.85%', '2': '10.00%', '3': '2.72%', '4': '0.42%'})	(1.15, {'1': '91.23%', '2': '5.01%', '3': '1.25%', '4': '2.51%'})	(1.12, {'1': '91.65%', '2': '5.45%', '3': '1.70%', '4': '1.19%'})	(1.77, {'1': '49.56%', '2': '31.12%', '3': '12.05%', '4': '7.28%'})		(1.27, {'1': '86.38%', '2': '6.25%', '3': '1.75%', '4': '5.62%'})	(1.03, {'1': '96.75%', '2': '3.25%'})	(1.31, {'1': '76.85%', '2': '16.47%', '3': '5.73%', '4': '0.95%'})	(1.51, {'1': '71.19%', '2': '14.86%', '3': '6.20%', '4': '7.75%'})	(1.25, {'1': '83.21%', '2': '11.03%', '3': '3.26%', '4': '2.51%'})	(1.48, {'1': '65.50%', '2': '23.33%', '3': '9.17%', '4': '2.00%'})	(1.37, {'1': '72.93%', '2': '20.05%', '3': '4.51%', '4': '2.51%'})	(1.05, {'1': '95.18%', '2': '4.82%'})	388	GOVERNANCE & POLITICAL SYSTEMS
(1.55, {'1': '66.08%', '2': '17.22%', '3': '12.41%', '4': '4.30%'})		(1.29, {'1': '77.93%', '2': '17.21%', '3': '2.62%', '4': '2.24%'})	(1.33, {'1': '76.32%', '2': '16.29%', '3': '5.16%', '4': '2.23%'})	(1.18, {'1': '88.10%', '2': '8.40%', '3': '1.38%', '4': '2.13%'})	(1.2, {'1': '87.33%', '2': '8.05%', '3': '2.23%', '4': '2.40%'})	(1.98, {'1': '38.16%', '2': '34.70%', '3': '17.93%', '4': '9.22%'})		(1.36, {'1': '81.46%', '2': '8.32%', '3': '3.03%', '4': '7.19%'})	(1.06, {'1': '94.84%', '2': '4.03%', '3': '1.02%', '4': '0.10%'})	(1.41, {'1': '68.86%', '2': '23.36%', '3': '5.60%', '4': '2.19%'})	(1.7, {'1': '58.26%', '2': '24.58%', '3': '6.50%', '4': '10.66%'})	(1.34, {'1': '74.72%', '2': '19.72%', '3': '2.91%', '4': '2.65%'})	(1.62, {'1': '56.59%', '2': '29.05%', '3': '10.35%', '4': '4.01%'})	(1.45, {'1': '66.62%', '2': '24.56%', '3': '6.17%', '4': '2.64%'})	(1.17, {'1': '85.01%', '2': '13.95%', '3': '0.52%', '4': '0.52%'})	389	GOVERNANCE & POLITICAL SYSTEMS
(1.59, {'1': '63.88%', '2': '19.65%', '3': '10.27%', '4': '6.21%'})		(1.26, {'1': '80.17%', '2': '15.59%', '3': '2.62%', '4': '1.62%'})	(1.31, {'1': '78.83%', '2': '14.10%', '3': '4.13%', '4': '2.93%'})	(1.16, {'1': '90.24%', '2': '6.01%', '3': '1.25%', '4': '2.50%'})	(1.12, {'1': '91.33%', '2': '6.29%', '3': '1.53%', '4': '0.85%'})	(2.02, {'1': '34.79%', '2': '38.00%', '3': '17.33%', '4': '9.88%'})		(1.3, {'1': '84.63%', '2': '7.05%', '3': '1.76%', '4': '6.55%'})	(1.03, {'1': '97.03%', '2': '2.97%'})	(1.31, {'1': '76.20%', '2': '18.75%', '3': '3.12%', '4': '1.92%'})	(1.59, {'1': '65.32%', '2': '18.57%', '3': '7.53%', '4': '8.57%'})	(1.27, {'1': '79.62%', '2': '16.10%', '3': '2.26%', '4': '2.01%'})	(1.58, {'1': '58.00%', '2': '29.00%', '3': '9.50%', '4': '3.50%'})	(1.4, {'1': '67.84%', '2': '26.01%', '3': '4.02%', '4': '2.14%'})	(1.06, {'1': '94.21%', '2': '5.54%', '3': '0.25%'})	390	GOVERNANCE & POLITICAL SYSTEMS
(1.56, {'1': '64.77%', '2': '19.32%', '3': '10.61%', '4': '5.30%'})		(1.26, {'1': '80.55%', '2': '15.46%', '3': '1.50%', '4': '2.49%'})	(1.27, {'1': '80.14%', '2': '14.36%', '3': '3.38%', '4': '2.12%'})	(1.14, {'1': '91.48%', '2': '5.26%', '3': '1.25%', '4': '2.01%'})	(1.11, {'1': '91.68%', '2': '6.11%', '3': '1.53%', '4': '0.68%'})	(1.71, {'1': '52.14%', '2': '30.03%', '3': '12.19%', '4': '5.65%'})		(1.27, {'1': '85.86%', '2': '6.51%', '3': '2.25%', '4': '5.38%'})	(1.04, {'1': '96.75%', '2': '2.98%', '3': '0.26%'})	(1.28, {'1': '76.57%', '2': '19.32%', '3': '3.62%', '4': '0.48%'})	(1.59, {'1': '62.69%', '2': '23.70%', '3': '5.18%', '4': '8.42%'})	(1.23, {'1': '82.49%', '2': '14.11%', '3': '1.64%', '4': '1.76%'})	(1.51, {'1': '62.00%', '2': '27.17%', '3': '8.83%', '4': '2.00%'})	(1.42, {'1': '69.01%', '2': '22.84%', '3': '5.40%', '4': '2.76%'})	(1.08, {'1': '92.68%', '2': '7.07%', '3': '0.25%'})	391	GOVERNANCE & POLITICAL SYSTEMS
(1.69, {'1': '59.02%', '2': '20.88%', '3': '12.11%', '4': '7.99%'})		(1.36, {'1': '73.19%', '2': '21.20%', '3': '2.49%', '4': '3.12%'})	(1.39, {'1': '73.19%', '2': '17.77%', '3': '5.78%', '4': '3.27%'})	(1.26, {'1': '81.51%', '2': '13.27%', '3': '2.55%', '4': '2.68%'})	(1.16, {'1': '88.05%', '2': '9.22%', '3': '1.54%', '4': '1.19%'})	(1.96, {'1': '36.26%', '2': '40.39%', '3': '14.84%', '4': '8.52%'})		(1.39, {'1': '77.93%', '2': '12.37%', '3': '2.68%', '4': '7.02%'})	(1.97, {'1': '55.89%', '2': '10.47%', '3': '14.55%', '4': '19.08%'})	(1.35, {'1': '71.04%', '2': '24.50%', '3': '2.97%', '4': '1.49%'})	(1.73, {'1': '54.67%', '2': '27.33%', '3': '8.13%', '4': '9.87%'})	(1.42, {'1': '67.47%', '2': '25.51%', '3': '4.08%', '4': '2.93%'})	(1.78, {'1': '46.14%', '2': '33.39%', '3': '16.44%', '4': '4.03%'})	(1.43, {'1': '66.58%', '2': '25.63%', '3': '5.53%', '4': '2.26%'})	(1.24, {'1': '80.10%', '2': '16.33%', '3': '2.81%', '4': '0.77%'})	392	GOVERNANCE & POLITICAL SYSTEMS
(1.74, {'1': '54.76%', '2': '23.00%', '3': '15.76%', '4': '6.48%'})		(1.25, {'1': '79.78%', '2': '17.60%', '3': '0.75%', '4': '1.87%'})	(1.41, {'1': '75.45%', '2': '13.96%', '3': '4.92%', '4': '5.67%'})	(1.26, {'1': '82.54%', '2': '11.81%', '3': '3.27%', '4': '2.39%'})	(1.15, {'1': '89.29%', '2': '7.48%', '3': '1.87%', '4': '1.36%'})	(1.88, {'1': '43.29%', '2': '34.30%', '3': '13.80%', '4': '8.61%'})		(1.45, {'1': '77.35%', '2': '9.89%', '3': '3.25%', '4': '9.51%'})	(1.25, {'1': '83.89%', '2': '8.69%', '3': '6.06%', '4': '1.36%'})	(1.34, {'1': '73.54%', '2': '19.90%', '3': '5.10%', '4': '1.46%'})	(1.67, {'1': '57.29%', '2': '26.69%', '3': '7.42%', '4': '8.59%'})	(1.32, {'1': '77.30%', '2': '16.02%', '3': '3.78%', '4': '2.90%'})	(1.74, {'1': '48.91%', '2': '33.56%', '3': '12.02%', '4': '5.51%'})	(1.45, {'1': '65.16%', '2': '27.44%', '3': '5.01%', '4': '2.38%'})	(1.16, {'1': '85.82%', '2': '12.66%', '3': '1.27%', '4': '0.25%'})	393	GOVERNANCE & POLITICAL SYSTEMS
(1.55, {'1': '65.31%', '2': '18.81%', '3': '11.44%', '4': '4.45%'})		(1.25, {'1': '79.78%', '2': '17.10%', '3': '1.12%', '4': '2.00%'})	(1.37, {'1': '74.93%', '2': '17.11%', '3': '4.25%', '4': '3.72%'})	(1.19, {'1': '87.66%', '2': '8.44%', '3': '1.64%', '4': '2.27%'})	(1.14, {'1': '90.17%', '2': '7.29%', '3': '1.36%', '4': '1.19%'})	(1.75, {'1': '47.38%', '2': '35.12%', '3': '13.03%', '4': '4.47%'})		(1.33, {'1': '83.71%', '2': '6.94%', '3': '1.52%', '4': '7.83%'})	(1.06, {'1': '94.03%', '2': '5.64%', '3': '0.17%', '4': '0.16%'})	(1.28, {'1': '77.24%', '2': '17.92%', '3': '4.36%', '4': '0.48%'})	(1.6, {'1': '63.62%', '2': '21.21%', '3': '7.20%', '4': '7.97%'})	(1.31, {'1': '76.76%', '2': '17.84%', '3': '3.02%', '4': '2.39%'})	(1.56, {'1': '59.53%', '2': '28.09%', '3': '9.03%', '4': '3.34%'})	(1.39, {'1': '69.30%', '2': '24.19%', '3': '4.76%', '4': '1.75%'})	(1.07, {'1': '94.42%', '2': '4.57%', '3': '0.76%', '4': '0.25%'})	394	GOVERNANCE & POLITICAL SYSTEMS
(1.48, {'1': '65.59%', '2': '24.19%', '3': '7.12%', '4': '3.10%'})		(1.53, {'1': '66.17%', '2': '21.35%', '3': '5.87%', '4': '6.62%'})	(1.37, {'1': '73.91%', '2': '17.90%', '3': '5.87%', '4': '2.32%'})	(1.32, {'1': '78.45%', '2': '15.34%', '3': '2.41%', '4': '3.80%'})	(1.25, {'1': '83.56%', '2': '11.13%', '3': '2.23%', '4': '3.08%'})	(2.02, {'1': '33.33%', '2': '40.68%', '3': '16.27%', '4': '9.71%'})		(1.41, {'1': '76.44%', '2': '13.44%', '3': '2.69%', '4': '7.43%'})	(1.1, {'1': '90.62%', '2': '8.37%', '3': '0.93%', '4': '0.08%'})	(1.36, {'1': '70.22%', '2': '24.07%', '3': '4.96%', '4': '0.74%'})	(1.67, {'1': '57.71%', '2': '26.20%', '3': '7.18%', '4': '8.91%'})	(1.62, {'1': '52.44%', '2': '36.79%', '3': '7.44%', '4': '3.33%'})	(1.73, {'1': '46.08%', '2': '38.56%', '3': '11.35%', '4': '4.01%'})	(1.48, {'1': '62.23%', '2': '29.99%', '3': '5.77%', '4': '2.01%'})	(1.15, {'1': '85.71%', '2': '13.52%', '3': '0.51%', '4': '0.26%'})	395	GOVERNANCE & POLITICAL SYSTEMS
(2.14, {'1': '40.34%', '2': '22.19%', '3': '20.76%', '4': '16.71%'})		(1.82, {'1': '54.00%', '2': '23.13%', '3': '10.13%', '4': '12.75%'})	(1.44, {'1': '70.94%', '2': '18.57%', '3': '5.80%', '4': '4.69%'})	(2.15, {'1': '47.92%', '2': '13.38%', '3': '14.42%', '4': '24.29%'})	(1.25, {'1': '82.93%', '2': '11.90%', '3': '2.24%', '4': '2.93%'})	(2.48, {'1': '23.32%', '2': '27.27%', '3': '27.40%', '4': '22.00%'})		(1.71, {'1': '64.74%', '2': '14.29%', '3': '6.56%', '4': '14.41%'})	(1.17, {'1': '88.50%', '2': '7.19%', '3': '2.79%', '4': '1.51%'})	(1.3, {'1': '74.63%', '2': '21.14%', '3': '3.73%', '4': '0.50%'})	(1.85, {'1': '52.91%', '2': '23.02%', '3': '10.71%', '4': '13.36%'})	(1.68, {'1': '51.86%', '2': '32.65%', '3': '10.88%', '4': '4.61%'})	(1.77, {'1': '48.23%', '2': '31.70%', '3': '14.50%', '4': '5.56%'})	(1.55, {'1': '63.32%', '2': '23.74%', '3': '7.79%', '4': '5.15%'})	(1.22, {'1': '82.34%', '2': '14.29%', '3': '2.08%', '4': '1.30%'})	396	GOVERNANCE & POLITICAL SYSTEMS
(1.89, {'1': '47.71%', '2': '23.92%', '3': '20.23%', '4': '8.14%'})		(1.3, {'1': '76.43%', '2': '18.95%', '3': '2.37%', '4': '2.24%'})	(1.43, {'1': '70.54%', '2': '19.63%', '3': '6.00%', '4': '3.83%'})	(1.22, {'1': '85.91%', '2': '8.68%', '3': '3.14%', '4': '2.26%'})	(1.11, {'1': '90.69%', '2': '7.95%', '3': '0.68%', '4': '0.68%'})	(1.85, {'1': '42.88%', '2': '36.20%', '3': '14.38%', '4': '6.55%'})		(1.33, {'1': '81.80%', '2': '9.61%', '3': '2.40%', '4': '6.19%'})	(1.06, {'1': '94.57%', '2': '5.17%', '3': '0.26%'})	(1.28, {'1': '77.48%', '2': '18.40%', '3': '3.15%', '4': '0.97%'})	(1.69, {'1': '54.09%', '2': '31.00%', '3': '6.60%', '4': '8.31%'})	(1.5, {'1': '62.89%', '2': '26.92%', '3': '7.80%', '4': '2.39%'})	(1.66, {'1': '54.67%', '2': '28.00%', '3': '14.00%', '4': '3.33%'})	(1.45, {'1': '65.50%', '2': '27.10%', '3': '4.64%', '4': '2.76%'})	(1.14, {'1': '88.13%', '2': '10.10%', '3': '1.01%', '4': '0.76%'})	397	GOVERNANCE & POLITICAL SYSTEMS
(1.79, {'1': '52.15%', '2': '23.67%', '3': '16.71%', '4': '7.47%'})		(1.31, {'1': '76.90%', '2': '17.48%', '3': '2.87%', '4': '2.75%'})	(1.67, {'1': '56.66%', '2': '27.12%', '3': '8.43%', '4': '7.78%'})	(1.5, {'1': '67.59%', '2': '19.60%', '3': '8.04%', '4': '4.77%'})	(1.19, {'1': '86.13%', '2': '9.98%', '3': '2.88%', '4': '1.02%'})	(2.11, {'1': '31.91%', '2': '36.30%', '3': '21.06%', '4': '10.72%'})		(1.59, {'1': '67.42%', '2': '15.97%', '3': '6.42%', '4': '10.19%'})	(1.33, {'1': '81.60%', '2': '7.30%', '3': '7.28%', '4': '3.83%'})	(1.34, {'1': '73.30%', '2': '20.39%', '3': '5.58%', '4': '0.73%'})	(1.69, {'1': '55.24%', '2': '28.80%', '3': '7.85%', '4': '8.12%'})	(1.72, {'1': '50.94%', '2': '30.94%', '3': '13.08%', '4': '5.03%'})	(1.74, {'1': '49.92%', '2': '31.89%', '3': '12.69%', '4': '5.51%'})	(1.52, {'1': '58.92%', '2': '32.79%', '3': '5.53%', '4': '2.76%'})	(1.19, {'1': '82.07%', '2': '17.17%', '3': '0.25%', '4': '0.51%'})	398	GOVERNANCE & POLITICAL SYSTEMS
(1.5, {'1': '68.77%', '2': '18.20%', '3': '7.71%', '4': '5.31%'})		(1.27, {'1': '79.43%', '2': '16.33%', '3': '1.87%', '4': '2.37%'})	(1.31, {'1': '79.59%', '2': '13.41%', '3': '3.24%', '4': '3.76%'})	(1.19, {'1': '87.58%', '2': '8.41%', '3': '1.76%', '4': '2.26%'})	(1.13, {'1': '90.52%', '2': '6.94%', '3': '1.18%', '4': '1.35%'})	(1.74, {'1': '48.80%', '2': '33.63%', '3': '11.88%', '4': '5.69%'})		(1.33, {'1': '84.00%', '2': '6.50%', '3': '2.00%', '4': '7.50%'})	(1.02, {'1': '98.03%', '2': '1.97%'})	(1.26, {'1': '79.12%', '2': '16.95%', '3': '2.95%', '4': '0.98%'})	(1.52, {'1': '65.89%', '2': '22.01%', '3': '6.25%', '4': '5.86%'})	(1.26, {'1': '80.71%', '2': '14.88%', '3': '2.27%', '4': '2.14%'})	(1.55, {'1': '58.03%', '2': '31.77%', '3': '7.36%', '4': '2.84%'})	(1.36, {'1': '72.45%', '2': '21.13%', '3': '4.53%', '4': '1.89%'})	(1.13, {'1': '88.32%', '2': '10.91%', '3': '0.51%', '4': '0.25%'})	399	GOVERNANCE & POLITICAL SYSTEMS
(1, {'1': '43.37%', '2': '8.80%', '3': '6.76%', '4': '2.42%', '5': '4.85%', '6': '8.42%', '7': '1.53%', '8': '4.72%', '9': '6.63%', '10': '2.30%', '11': '0.64%', '12': '1.53%', '13': '1.40%', '14': '6.63%'})		(3, {'1': '13.96%', '2': '14.60%', '3': '26.25%', '4': '3.46%', '5': '3.46%', '6': '5.38%', '7': '2.94%', '8': '13.57%', '9': '2.18%', '10': '1.41%', '11': '0.38%', '12': '3.97%', '13': '4.10%', '14': '4.35%'})	(3, {'1': '17.66%', '2': '8.60%', '3': '27.16%', '4': '1.46%', '5': '1.82%', '6': '5.42%', '7': '1.33%', '8': '15.62%', '9': '1.77%', '10': '0.83%', '11': '1.19%', '12': '4.63%', '13': '2.52%', '14': '9.99%'})	(1, {'1': '28.70%', '2': '13.38%', '3': '11.56%', '4': '1.95%', '5': '3.25%', '6': '12.99%', '7': '2.08%', '8': '7.79%', '9': '2.47%', '10': '0.91%', '12': '3.90%', '13': '1.30%', '14': '9.74%'})	(3, {'1': '25.41%', '2': '20.15%', '3': '26.86%', '4': '1.63%', '5': '2.18%', '6': '7.80%', '7': '0.91%', '8': '4.17%', '9': '0.73%', '10': '0.73%', '12': '2.90%', '13': '1.81%', '14': '4.72%'})	(1, {'1': '22.15%', '2': '12.79%', '3': '9.77%', '4': '6.46%', '5': '4.68%', '6': '9.35%', '7': '3.71%', '8': '5.91%', '9': '5.91%', '10': '3.16%', '11': '2.06%', '12': '4.13%', '13': '2.34%', '14': '7.57%'})		(3, {'1': '12.02%', '2': '6.81%', '3': '19.09%', '4': '1.07%', '5': '2.40%', '6': '14.42%', '7': '3.60%', '8': '9.75%', '9': '1.74%', '10': '1.87%', '11': '1.47%', '12': '5.74%', '13': '3.47%', '14': '16.56%'})	(1, {'1': '24.14%', '2': '10.69%', '3': '6.46%', '4': '6.04%', '5': '7.70%', '6': '5.71%', '7': '1.02%', '8': '9.27%', '9': '2.73%', '10': '2.92%', '11': '2.32%', '12': '5.43%', '13': '5.97%', '14': '9.61%'})	(1, {'1': '46.67%', '2': '20.00%', '3': '15.93%', '4': '1.85%', '5': '1.85%', '6': '1.85%', '7': '1.11%', '8': '2.22%', '9': '2.22%', '10': '0.74%', '12': '1.48%', '13': '2.96%', '14': '1.11%'})	(1, {'1': '49.55%', '2': '11.64%', '3': '13.43%', '4': '1.79%', '5': '3.43%', '6': '5.67%', '7': '1.94%', '8': '1.64%', '9': '1.19%', '10': '0.90%', '11': '0.75%', '12': '1.94%', '13': '0.75%', '14': '5.37%'})	(1, {'1': '28.51%', '2': '18.28%', '3': '21.42%', '4': '1.64%', '5': '1.77%', '6': '5.59%', '7': '1.50%', '8': '9.28%', '9': '2.18%', '10': '0.41%', '11': '0.68%', '12': '2.46%', '13': '0.95%', '14': '5.32%'})	(1, {'1': '56.81%', '2': '10.16%', '3': '8.89%', '4': '5.99%', '5': '3.81%', '6': '5.08%', '7': '1.09%', '8': '0.54%', '9': '3.09%', '10': '0.36%', '11': '0.54%', '12': '0.36%', '13': '0.73%', '14': '2.54%'})	(1, {'1': '45.42%', '2': '15.51%', '3': '8.18%', '4': '2.26%', '5': '2.40%', '6': '5.92%', '7': '1.83%', '8': '2.68%', '9': '3.53%', '10': '1.27%', '11': '1.83%', '12': '0.28%', '13': '0.85%', '14': '8.04%'})	(1, {'1': '72.14%', '2': '8.59%', '3': '6.77%', '4': '2.34%', '5': '1.56%', '6': '2.60%', '8': '2.86%', '9': '1.04%', '10': '0.26%', '11': '0.26%', '13': '0.26%', '14': '1.30%'})	400	GOVERNANCE & POLITICAL SYSTEMS
(6, {'1': '5.80%', '2': '10.28%', '3': '13.44%', '4': '4.87%', '5': '8.56%', '6': '13.97%', '7': '3.82%', '8': '5.80%', '9': '10.01%', '10': '8.30%', '11': '1.45%', '12': '1.84%', '13': '2.24%', '14': '9.62%'})		(8, {'1': '7.17%', '2': '9.30%', '3': '16.87%', '4': '6.51%', '5': '6.24%', '6': '9.03%', '7': '4.52%', '8': '17.53%', '9': '2.79%', '10': '1.46%', '11': '0.40%', '12': '3.98%', '13': '9.16%', '14': '5.05%'})	(3, {'1': '7.15%', '2': '11.20%', '3': '15.36%', '4': '2.54%', '5': '3.05%', '6': '12.49%', '7': '2.83%', '8': '14.00%', '9': '4.97%', '10': '2.57%', '11': '1.02%', '12': '7.40%', '13': '4.25%', '14': '11.15%'})	(6, {'1': '7.47%', '2': '13.11%', '3': '13.11%', '4': '4.72%', '5': '4.46%', '6': '19.79%', '7': '5.11%', '8': '10.88%', '9': '4.06%', '10': '1.05%', '11': '0.13%', '12': '6.03%', '13': '2.10%', '14': '7.99%'})	(3, {'1': '3.22%', '2': '16.30%', '3': '21.13%', '4': '4.83%', '5': '8.05%', '6': '12.27%', '7': '3.82%', '8': '6.04%', '9': '1.41%', '10': '1.01%', '11': '1.01%', '12': '10.26%', '13': '3.22%', '14': '7.44%'})	(6, {'1': '6.35%', '2': '10.75%', '3': '11.24%', '4': '6.84%', '5': '5.05%', '6': '13.19%', '7': '4.23%', '8': '4.89%', '9': '12.38%', '10': '4.07%', '11': '2.93%', '12': '5.70%', '13': '2.12%', '14': '10.26%'})		(6, {'1': '3.86%', '2': '8.73%', '3': '11.30%', '4': '2.15%', '5': '3.43%', '6': '16.17%', '7': '3.43%', '8': '12.16%', '9': '4.86%', '10': '2.43%', '11': '1.14%', '12': '9.59%', '13': '4.58%', '14': '16.17%'})	(2, {'1': '5.11%', '2': '11.65%', '3': '8.51%', '4': '5.07%', '5': '7.70%', '6': '8.15%', '7': '1.49%', '8': '10.79%', '9': '8.52%', '10': '5.03%', '11': '3.40%', '12': '6.02%', '13': '9.90%', '14': '8.66%'})	(2, {'1': '9.88%', '2': '31.40%', '3': '18.02%', '4': '4.07%', '5': '4.07%', '6': '5.23%', '7': '7.56%', '8': '3.49%', '9': '5.81%', '10': '1.16%', '11': '0.58%', '12': '2.33%', '13': '3.49%', '14': '2.91%'})	(2, {'1': '4.84%', '2': '24.06%', '3': '20.16%', '4': '5.78%', '5': '6.56%', '6': '10.62%', '7': '2.97%', '8': '3.12%', '9': '5.31%', '10': '3.28%', '11': '1.25%', '12': '2.50%', '13': '2.19%', '14': '7.34%'})	(3, {'1': '6.39%', '2': '16.11%', '3': '19.86%', '4': '5.83%', '5': '3.75%', '6': '14.31%', '7': '1.94%', '8': '12.64%', '9': '3.61%', '10': '0.56%', '11': '1.53%', '12': '3.61%', '13': '1.67%', '14': '8.19%'})	(2, {'1': '4.40%', '2': '21.22%', '3': '17.97%', '4': '7.46%', '5': '9.75%', '6': '9.56%', '7': '3.25%', '8': '4.40%', '9': '7.65%', '10': '1.53%', '11': '2.68%', '12': '3.82%', '13': '1.72%', '14': '4.59%'})	(2, {'1': '6.26%', '2': '23.00%', '3': '13.97%', '4': '7.57%', '5': '7.42%', '6': '11.79%', '7': '4.08%', '8': '5.82%', '9': '5.53%', '10': '1.60%', '11': '2.91%', '12': '1.60%', '13': '2.04%', '14': '6.40%'})	(2, {'1': '3.55%', '2': '28.42%', '3': '23.22%', '4': '4.37%', '5': '6.28%', '6': '8.20%', '7': '1.64%', '8': '9.84%', '9': '6.56%', '10': '1.64%', '11': '0.55%', '12': '0.27%', '13': '1.37%', '14': '4.10%'})	401	GOVERNANCE & POLITICAL SYSTEMS
(1.61, {'1': '42.93%', '2': '52.79%', '3': '4.28%'})		(1.59, {'1': '43.95%', '2': '53.56%', '3': '2.50%'})	(1.54, {'1': '49.22%', '2': '47.63%', '3': '3.15%'})	(1.77, {'1': '30.37%', '2': '62.16%', '3': '7.46%'})	(1.58, {'1': '43.41%', '2': '55.31%', '3': '1.28%'})	(1.71, {'1': '37.04%', '2': '55.24%', '3': '7.72%'})		(1.59, {'1': '41.73%', '2': '57.47%', '3': '0.80%'})	(1.5, {'1': '51.82%', '2': '46.79%', '3': '1.39%'})	(1.63, {'1': '52.16%', '2': '32.23%', '3': '15.61%'})	(1.46, {'1': '57.24%', '2': '39.51%', '3': '3.25%'})	(1.62, {'1': '42.46%', '2': '52.69%', '3': '4.85%'})	(1.38, {'1': '64.60%', '2': '32.55%', '3': '2.85%'})	(1.51, {'1': '51.57%', '2': '46.16%', '3': '2.26%'})	(1.61, {'1': '44.83%', '2': '49.34%', '3': '5.84%'})	402	GOVERNANCE & POLITICAL SYSTEMS
(3.31, {'1': '5.03%', '2': '14.65%', '3': '24.65%', '4': '55.66%'})		(2.93, {'1': '19.07%', '2': '16.44%', '3': '17.38%', '4': '47.11%'})	(3.12, {'1': '10.81%', '2': '20.64%', '3': '14.21%', '4': '54.34%'})	(3.35, {'1': '8.93%', '2': '10.44%', '3': '17.04%', '4': '63.58%'})	(3.03, {'1': '15.86%', '2': '16.50%', '3': '16.77%', '4': '50.87%'})	(3.16, {'1': '4.92%', '2': '16.77%', '3': '36.01%', '4': '42.29%'})		(2.43, {'1': '38.69%', '2': '15.80%', '3': '9.67%', '4': '35.84%'})	(2.36, {'1': '36.79%', '2': '20.48%', '3': '13.12%', '4': '29.62%'})	(2.04, {'1': '43.60%', '2': '25.90%', '3': '13.49%', '4': '17.01%'})	(2.76, {'1': '20.44%', '2': '21.10%', '3': '20.64%', '4': '37.82%'})	(3.0, {'1': '6.07%', '2': '24.67%', '3': '32.83%', '4': '36.43%'})	(2.99, {'1': '8.70%', '2': '24.66%', '3': '25.25%', '4': '41.39%'})	(2.92, {'1': '8.16%', '2': '26.82%', '3': '29.48%', '4': '35.55%'})	(2.79, {'1': '12.36%', '2': '30.45%', '3': '23.18%', '4': '34.01%'})	403	GOVERNANCE & POLITICAL SYSTEMS
(2.85, {'1': '18.16%', '2': '20.38%', '3': '19.27%', '4': '42.19%'})		(2.16, {'1': '41.39%', '2': '24.42%', '3': '11.36%', '4': '22.84%'})	(2.3, {'1': '34.10%', '2': '29.13%', '3': '9.77%', '4': '27.00%'})	(2.32, {'1': '32.15%', '2': '30.32%', '3': '11.05%', '4': '26.47%'})	(2.22, {'1': '38.02%', '2': '26.59%', '3': '10.53%', '4': '24.86%'})	(2.61, {'1': '17.04%', '2': '30.40%', '3': '26.72%', '4': '25.84%'})		(1.85, {'1': '59.92%', '2': '14.72%', '3': '6.27%', '4': '19.08%'})	(1.75, {'1': '55.54%', '2': '27.05%', '3': '4.50%', '4': '12.92%'})	(1.68, {'1': '60.54%', '2': '20.79%', '3': '8.99%', '4': '9.67%'})	(2.47, {'1': '27.01%', '2': '26.75%', '3': '17.97%', '4': '28.27%'})	(2.3, {'1': '23.07%', '2': '41.91%', '3': '17.26%', '4': '17.76%'})	(2.49, {'1': '17.37%', '2': '37.08%', '3': '24.92%', '4': '20.64%'})	(2.22, {'1': '21.46%', '2': '45.95%', '3': '21.39%', '4': '11.20%'})	(2.14, {'1': '32.23%', '2': '37.69%', '3': '13.83%', '4': '16.24%'})	404	GOVERNANCE & POLITICAL SYSTEMS
(3.42, {'1': '4.30%', '2': '9.68%', '3': '25.93%', '4': '60.09%'})		(3.27, {'1': '10.14%', '2': '9.70%', '3': '22.97%', '4': '57.20%'})	(3.45, {'1': '3.29%', '2': '14.58%', '3': '16.29%', '4': '65.83%'})	(3.46, {'1': '7.54%', '2': '7.98%', '3': '15.14%', '4': '69.35%'})	(3.27, {'1': '9.26%', '2': '13.53%', '3': '18.35%', '4': '58.86%'})	(3.15, {'1': '5.61%', '2': '16.12%', '3': '35.65%', '4': '42.62%'})		(3.1, {'1': '17.81%', '2': '11.75%', '3': '12.63%', '4': '57.80%'})	(3.3, {'1': '4.57%', '2': '12.25%', '3': '31.46%', '4': '51.72%'})	(2.24, {'1': '33.53%', '2': '28.71%', '3': '18.09%', '4': '19.67%'})	(3.11, {'1': '11.14%', '2': '17.68%', '3': '20.40%', '4': '50.78%'})	(3.21, {'1': '4.04%', '2': '18.35%', '3': '30.58%', '4': '47.04%'})	(2.99, {'1': '9.18%', '2': '23.32%', '3': '26.52%', '4': '40.99%'})	(2.99, {'1': '7.28%', '2': '26.05%', '3': '26.62%', '4': '40.05%'})	(3.2, {'1': '5.77%', '2': '18.46%', '3': '25.38%', '4': '50.38%'})	405	GOVERNANCE & POLITICAL SYSTEMS
(2.58, {'1': '23.71%', '2': '26.51%', '3': '17.48%', '4': '32.29%'})		(1.98, {'1': '47.30%', '2': '25.22%', '3': '9.50%', '4': '17.99%'})	(1.78, {'1': '50.95%', '2': '31.61%', '3': '5.60%', '4': '11.84%'})	(1.77, {'1': '53.33%', '2': '28.81%', '3': '5.53%', '4': '12.33%'})	(1.83, {'1': '55.88%', '2': '21.25%', '3': '6.51%', '4': '16.37%'})	(2.54, {'1': '16.28%', '2': '33.49%', '3': '30.27%', '4': '19.96%'})		(1.55, {'1': '70.18%', '2': '15.32%', '3': '3.37%', '4': '11.13%'})	(2.12, {'1': '37.22%', '2': '30.71%', '3': '14.56%', '4': '17.51%'})	(1.6, {'1': '64.17%', '2': '19.98%', '3': '7.30%', '4': '8.55%'})	(2.1, {'1': '37.96%', '2': '31.68%', '3': '12.76%', '4': '17.60%'})	(2.04, {'1': '31.35%', '2': '43.64%', '3': '14.88%', '4': '10.13%'})	(2.36, {'1': '20.94%', '2': '40.62%', '3': '19.51%', '4': '18.93%'})	(2.15, {'1': '24.12%', '2': '47.61%', '3': '17.53%', '4': '10.74%'})	(1.77, {'1': '48.03%', '2': '35.71%', '3': '7.88%', '4': '8.39%'})	406	GOVERNANCE & POLITICAL SYSTEMS
(1.67, {'1': '53.42%', '2': '29.94%', '3': '12.78%', '4': '3.86%'})		(3.06, {'1': '8.90%', '2': '22.49%', '3': '22.12%', '4': '46.49%'})	(1.72, {'1': '48.39%', '2': '37.31%', '3': '8.43%', '4': '5.87%'})	(3.23, {'1': '2.96%', '2': '19.09%', '3': '30.06%', '4': '47.89%'})	(3.02, {'1': '7.56%', '2': '26.19%', '3': '22.50%', '4': '43.74%'})	(2.33, {'1': '26.14%', '2': '30.72%', '3': '27.30%', '4': '15.84%'})		(2.49, {'1': '16.11%', '2': '44.09%', '3': '14.09%', '4': '25.71%'})	(2.22, {'1': '17.10%', '2': '46.21%', '3': '34.56%', '4': '2.13%'})	(1.61, {'1': '65.82%', '2': '18.99%', '3': '3.80%', '4': '11.39%'})	(2.78, {'1': '12.32%', '2': '28.52%', '3': '27.71%', '4': '31.45%'})	(2.5, {'1': '17.50%', '2': '36.39%', '3': '24.51%', '4': '21.60%'})	(1.53, {'1': '59.41%', '2': '29.96%', '3': '8.61%', '4': '2.03%'})	(1.84, {'1': '41.51%', '2': '37.92%', '3': '15.18%', '4': '5.38%'})	(1.16, {'1': '87.80%', '2': '9.11%', '3': '2.82%', '4': '0.26%'})	407	GOVERNANCE & POLITICAL SYSTEMS
(1, {'1': '21.46%', '2': '10.79%', '3': '9.49%', '4': '6.50%', '5': '12.48%', '6': '10.53%', '7': '8.06%', '8': '6.89%', '9': '4.81%', '10': '6.37%', '11': '2.60%'})		(2, {'1': '5.00%', '2': '17.38%', '3': '7.38%', '4': '8.75%', '5': '11.88%', '6': '6.50%', '7': '14.13%', '8': '12.88%', '9': '4.88%', '10': '7.13%', '11': '4.13%'})	(2, {'1': '16.37%', '2': '23.04%', '3': '5.00%', '4': '8.94%', '5': '8.92%', '6': '6.70%', '7': '9.87%', '8': '6.45%', '9': '1.54%', '10': '12.67%', '11': '0.52%'})	(2, {'1': '21.98%', '2': '25.92%', '3': '10.29%', '4': '4.45%', '5': '5.84%', '6': '6.61%', '7': '11.56%', '8': '4.07%', '9': '2.03%', '10': '6.73%', '11': '0.51%'})	(2, {'1': '22.07%', '2': '35.79%', '3': '9.94%', '4': '9.15%', '5': '6.76%', '6': '1.39%', '7': '4.37%', '8': '2.98%', '9': '1.19%', '10': '2.19%', '11': '4.17%'})	(1, {'1': '17.22%', '2': '16.02%', '3': '10.48%', '4': '7.63%', '5': '5.84%', '6': '7.93%', '7': '7.93%', '8': '7.78%', '9': '8.38%', '10': '6.59%', '11': '4.19%'})		(2, {'1': '12.55%', '2': '37.65%', '3': '8.28%', '4': '6.94%', '5': '5.47%', '6': '5.34%', '7': '5.61%', '8': '2.00%', '9': '2.40%', '10': '7.74%', '11': '6.01%'})	(5, {'1': '14.11%', '2': '8.74%', '3': '3.53%', '4': '3.71%', '5': '20.24%', '6': '5.59%', '7': '15.34%', '8': '13.49%', '9': '2.91%', '10': '6.22%', '11': '6.12%'})	(2, {'1': '25.16%', '2': '34.19%', '3': '7.74%', '4': '4.52%', '5': '3.23%', '6': '3.87%', '7': '13.55%', '8': '1.94%', '9': '2.58%', '10': '1.94%', '11': '1.29%'})	(1, {'1': '42.70%', '2': '16.99%', '3': '8.15%', '4': '7.02%', '5': '5.06%', '6': '5.76%', '7': '4.07%', '8': '4.35%', '9': '2.81%', '10': '2.11%', '11': '0.98%'})	(2, {'1': '21.63%', '2': '26.59%', '3': '4.83%', '4': '4.33%', '5': '6.11%', '6': '7.89%', '7': '12.21%', '8': '3.56%', '9': '2.04%', '10': '9.03%', '11': '1.78%'})	(1, {'1': '59.83%', '2': '21.72%', '3': '7.41%', '4': '3.45%', '5': '1.55%', '6': '1.38%', '7': '1.38%', '8': '1.21%', '9': '0.86%', '10': '1.03%', '11': '0.17%'})	(1, {'1': '36.65%', '2': '10.08%', '3': '5.89%', '4': '4.58%', '5': '8.77%', '6': '12.17%', '7': '12.17%', '8': '4.84%', '9': '1.31%', '10': '2.88%', '11': '0.65%'})	(1, {'1': '25.81%', '2': '17.20%', '3': '8.60%', '4': '2.42%', '5': '18.28%', '6': '5.11%', '7': '10.48%', '8': '5.38%', '9': '1.88%', '10': '1.88%', '11': '2.96%'})	408	GOVERNANCE & POLITICAL SYSTEMS
(7, {'1': '5.26%', '2': '7.95%', '3': '9.70%', '4': '5.53%', '5': '13.61%', '6': '12.26%', '7': '14.69%', '8': '11.46%', '9': '6.20%', '10': '10.24%', '11': '3.10%'})		(5, {'1': '5.27%', '2': '10.15%', '3': '7.46%', '4': '9.13%', '5': '13.88%', '6': '8.74%', '7': '12.47%', '8': '11.70%', '9': '6.68%', '10': '8.35%', '11': '6.17%'})	(10, {'1': '7.28%', '2': '12.86%', '3': '9.74%', '4': '12.26%', '5': '8.07%', '6': '11.93%', '7': '12.44%', '8': '6.84%', '9': '1.90%', '10': '16.22%', '11': '0.48%'})	(2, {'1': '7.98%', '2': '15.31%', '3': '10.34%', '4': '10.73%', '5': '10.21%', '6': '11.91%', '7': '11.13%', '8': '7.46%', '9': '2.75%', '10': '11.39%', '11': '0.79%'})	(4, {'1': '11.33%', '2': '17.78%', '3': '10.44%', '4': '19.56%', '5': '10.89%', '6': '6.22%', '7': '8.44%', '8': '4.67%', '9': '2.89%', '10': '4.44%', '11': '3.33%'})	(3, {'1': '11.96%', '2': '11.96%', '3': '13.77%', '4': '6.70%', '5': '6.70%', '6': '10.33%', '7': '8.15%', '8': '9.24%', '9': '6.70%', '10': '11.05%', '11': '3.44%'})		(2, {'1': '4.94%', '2': '16.36%', '3': '14.97%', '4': '12.19%', '5': '10.34%', '6': '8.02%', '7': '10.03%', '8': '4.17%', '9': '3.55%', '10': '9.10%', '11': '6.33%'})	(5, {'1': '9.14%', '2': '15.14%', '3': '6.88%', '4': '6.40%', '5': '15.31%', '6': '5.70%', '7': '10.64%', '8': '13.45%', '9': '4.41%', '10': '10.69%', '11': '2.24%'})	(2, {'1': '8.80%', '2': '18.40%', '3': '14.40%', '4': '14.40%', '5': '5.60%', '6': '4.00%', '7': '16.80%', '8': '7.20%', '9': '4.80%', '10': '3.20%', '11': '2.40%'})	(2, {'1': '9.13%', '2': '22.75%', '3': '9.71%', '4': '12.03%', '5': '8.84%', '6': '10.00%', '7': '10.14%', '8': '7.25%', '9': '3.19%', '10': '5.07%', '11': '1.88%'})	(7, {'1': '11.39%', '2': '12.30%', '3': '10.08%', '4': '5.89%', '5': '10.47%', '6': '14.14%', '7': '14.53%', '8': '5.89%', '9': '2.36%', '10': '12.04%', '11': '0.92%'})	(2, {'1': '7.83%', '2': '34.61%', '3': '18.61%', '4': '11.30%', '5': '6.61%', '6': '5.91%', '7': '4.52%', '8': '2.43%', '9': '2.26%', '10': '5.57%', '11': '0.35%'})	(6, {'1': '10.30%', '2': '12.95%', '3': '11.76%', '4': '7.66%', '5': '13.47%', '6': '15.59%', '7': '12.02%', '8': '6.74%', '9': '3.04%', '10': '5.55%', '11': '0.92%'})	(7, {'1': '9.58%', '2': '12.87%', '3': '8.08%', '4': '3.59%', '5': '12.28%', '6': '7.78%', '7': '14.97%', '8': '11.98%', '9': '5.39%', '10': '9.28%', '11': '4.19%'})	409	GOVERNANCE & POLITICAL SYSTEMS
(1.49, {'1': '55.43%', '2': '40.11%', '3': '4.46%'})		(1.58, {'1': '46.92%', '2': '48.57%', '3': '4.51%'})	(1.51, {'1': '55.69%', '2': '37.99%', '3': '6.32%'})	(1.81, {'1': '35.36%', '2': '48.33%', '3': '16.32%'})	(1.66, {'1': '38.11%', '2': '57.47%', '3': '4.41%'})	(1.76, {'1': '38.74%', '2': '46.81%', '3': '14.45%'})		(1.57, {'1': '45.12%', '2': '53.15%', '3': '1.73%'})	(1.34, {'1': '66.81%', '2': '32.51%', '3': '0.68%'})	(1.95, {'1': '33.50%', '2': '38.42%', '3': '28.08%'})	(1.53, {'1': '54.85%', '2': '37.35%', '3': '7.79%'})	(1.63, {'1': '48.86%', '2': '39.70%', '3': '11.43%'})	(1.45, {'1': '61.37%', '2': '32.63%', '3': '6.00%'})	(1.46, {'1': '59.59%', '2': '34.61%', '3': '5.80%'})	(1.79, {'1': '32.88%', '2': '55.71%', '3': '11.41%'})	410	GOVERNANCE & POLITICAL SYSTEMS
(1.62, {'1': '44.28%', '2': '49.56%', '3': '6.16%'})		(1.39, {'1': '61.75%', '2': '37.13%', '3': '1.13%'})	(1.48, {'1': '55.87%', '2': '40.42%', '3': '3.71%'})	(1.56, {'1': '54.52%', '2': '34.78%', '3': '10.70%'})	(1.41, {'1': '59.41%', '2': '39.72%', '3': '0.87%'})	(1.85, {'1': '28.79%', '2': '57.33%', '3': '13.88%'})		(1.54, {'1': '47.78%', '2': '50.44%', '3': '1.77%'})	(1.46, {'1': '54.49%', '2': '44.98%', '3': '0.53%'})	(1.65, {'1': '55.36%', '2': '23.88%', '3': '20.76%'})	(1.6, {'1': '45.29%', '2': '49.14%', '3': '5.58%'})	(1.67, {'1': '38.61%', '2': '55.57%', '3': '5.82%'})	(1.52, {'1': '55.54%', '2': '37.42%', '3': '7.05%'})	(1.61, {'1': '44.22%', '2': '50.70%', '3': '5.08%'})	(1.77, {'1': '40.64%', '2': '41.44%', '3': '17.91%'})	411	GOVERNANCE & POLITICAL SYSTEMS
(1.43, {'1': '58.24%', '2': '40.38%', '3': '1.38%'})		(1.72, {'1': '28.99%', '2': '69.63%', '3': '1.38%'})	(1.61, {'1': '40.07%', '2': '59.02%', '3': '0.91%'})	(1.79, {'1': '24.21%', '2': '72.44%', '3': '3.35%'})	(1.68, {'1': '34.12%', '2': '64.20%', '3': '1.67%'})	(1.6, {'1': '47.78%', '2': '44.87%', '3': '7.35%'})		(1.61, {'1': '39.51%', '2': '59.91%', '3': '0.58%'})	(1.44, {'1': '55.59%', '2': '44.41%'})	(1.5, {'1': '68.25%', '2': '13.95%', '3': '17.80%'})	(1.35, {'1': '67.31%', '2': '30.58%', '3': '2.11%'})	(1.65, {'1': '37.64%', '2': '59.51%', '3': '2.85%'})	(1.28, {'1': '73.49%', '2': '24.83%', '3': '1.68%'})	(1.37, {'1': '65.24%', '2': '32.62%', '3': '2.14%'})	(1.1, {'1': '91.32%', '2': '7.28%', '3': '1.40%'})	412	GOVERNANCE & POLITICAL SYSTEMS
(1.78, {'1': '37.99%', '2': '45.81%', '3': '16.20%'})		(2.33, {'1': '15.95%', '2': '34.67%', '3': '49.37%'})	(1.96, {'1': '19.94%', '2': '63.78%', '3': '16.28%'})	(2.5, {'1': '10.95%', '2': '28.26%', '3': '60.78%'})	(2.24, {'1': '18.37%', '2': '39.48%', '3': '42.15%'})	(1.85, {'1': '38.33%', '2': '38.33%', '3': '23.33%'})		(2.05, {'1': '28.32%', '2': '38.60%', '3': '33.08%'})	(1.59, {'1': '54.37%', '2': '32.34%', '3': '13.30%'})	(1.16, {'1': '88.53%', '2': '7.06%', '3': '4.41%'})	(1.88, {'1': '35.85%', '2': '40.58%', '3': '23.58%'})	(2.13, {'1': '16.19%', '2': '54.93%', '3': '28.88%'})	(1.43, {'1': '64.05%', '2': '29.38%', '3': '6.58%'})	(1.87, {'1': '39.55%', '2': '33.65%', '3': '26.81%'})	(1.14, {'1': '87.52%', '2': '10.66%', '3': '1.82%'})	413	GOVERNANCE & POLITICAL SYSTEMS
(1.33, {'1': '70.94%', '2': '25.41%', '3': '3.65%'})		(1.43, {'1': '57.73%', '2': '41.15%', '3': '1.12%'})	(1.29, {'1': '72.81%', '2': '25.19%', '3': '2.00%'})	(1.47, {'1': '57.38%', '2': '38.08%', '3': '4.54%'})	(1.35, {'1': '65.39%', '2': '33.74%', '3': '0.87%'})	(1.56, {'1': '56.36%', '2': '31.59%', '3': '12.06%'})		(1.39, {'1': '62.58%', '2': '35.65%', '3': '1.77%'})	(1.18, {'1': '82.96%', '2': '16.04%', '3': '1.00%'})	(1.42, {'1': '74.77%', '2': '8.21%', '3': '17.02%'})	(1.29, {'1': '74.42%', '2': '22.21%', '3': '3.38%'})	(1.44, {'1': '62.68%', '2': '30.57%', '3': '6.75%'})	(1.18, {'1': '84.15%', '2': '14.00%', '3': '1.85%'})	(1.16, {'1': '86.72%', '2': '10.78%', '3': '2.51%'})	(1.25, {'1': '84.36%', '2': '6.41%', '3': '9.23%'})	414	GOVERNANCE & POLITICAL SYSTEMS
(1.53, {'1': '49.08%', '2': '49.00%', '3': '1.92%'})		(1.61, {'1': '40.19%', '2': '58.43%', '3': '1.38%'})	(1.5, {'1': '50.84%', '2': '48.68%', '3': '0.47%'})	(1.76, {'1': '26.20%', '2': '71.58%', '3': '2.23%'})	(1.68, {'1': '32.10%', '2': '67.38%', '3': '0.52%'})	(1.65, {'1': '41.11%', '2': '52.58%', '3': '6.31%'})		(1.66, {'1': '34.48%', '2': '64.94%', '3': '0.59%'})	(1.89, {'1': '11.35%', '2': '88.14%', '3': '0.50%'})	(1.43, {'1': '64.45%', '2': '28.24%', '3': '7.31%'})	(1.5, {'1': '51.72%', '2': '46.48%', '3': '1.80%'})	(1.56, {'1': '46.29%', '2': '51.28%', '3': '2.43%'})	(1.34, {'1': '67.22%', '2': '31.61%', '3': '1.17%'})	(1.49, {'1': '53.13%', '2': '44.91%', '3': '1.96%'})	(1.6, {'1': '41.23%', '2': '57.08%', '3': '1.69%'})	415	GOVERNANCE & POLITICAL SYSTEMS
(1.46, {'1': '57.77%', '2': '37.99%', '3': '4.24%'})		(1.73, {'1': '28.97%', '2': '69.28%', '3': '1.76%'})	(1.71, {'1': '32.09%', '2': '65.01%', '3': '2.90%'})	(1.85, {'1': '18.39%', '2': '77.74%', '3': '3.87%'})	(1.65, {'1': '36.22%', '2': '62.23%', '3': '1.55%'})	(1.6, {'1': '51.54%', '2': '36.98%', '3': '11.48%'})		(1.6, {'1': '40.83%', '2': '58.50%', '3': '0.66%'})	(1.46, {'1': '54.59%', '2': '44.53%', '3': '0.87%'})	(1.56, {'1': '65.20%', '2': '13.18%', '3': '21.62%'})	(1.54, {'1': '52.33%', '2': '41.48%', '3': '6.19%'})	(1.73, {'1': '32.66%', '2': '62.03%', '3': '5.31%'})	(1.41, {'1': '66.36%', '2': '26.07%', '3': '7.57%'})	(1.5, {'1': '52.55%', '2': '44.43%', '3': '3.02%'})	(1.35, {'1': '75.39%', '2': '14.05%', '3': '10.57%'})	416	GOVERNANCE & POLITICAL SYSTEMS
(2.08, {'1': '27.63%', '2': '46.13%', '3': '17.24%', '4': '9.00%'})		(2.42, {'1': '23.06%', '2': '35.09%', '3': '19.05%', '4': '22.81%'})	(2.69, {'1': '15.51%', '2': '33.67%', '3': '17.48%', '4': '33.35%'})	(2.39, {'1': '24.62%', '2': '33.67%', '3': '20.15%', '4': '21.56%'})	(1.92, {'1': '43.82%', '2': '34.36%', '3': '8.11%', '4': '13.71%'})	(2.29, {'1': '23.67%', '2': '36.93%', '3': '25.75%', '4': '13.65%'})		(1.94, {'1': '48.28%', '2': '26.56%', '3': '8.01%', '4': '17.15%'})	(2.69, {'1': '13.24%', '2': '30.67%', '3': '29.54%', '4': '26.55%'})	(1.86, {'1': '44.14%', '2': '36.89%', '3': '8.32%', '4': '10.66%'})	(2.07, {'1': '35.46%', '2': '36.70%', '3': '13.30%', '4': '14.54%'})	(2.72, {'1': '8.34%', '2': '39.02%', '3': '24.90%', '4': '27.73%'})	(N/A, {})	(1.96, {'1': '30.54%', '2': '48.97%', '3': '14.69%', '4': '5.80%'})	(N/A, {})	417	GOVERNANCE & POLITICAL SYSTEMS
(2.13, {'1': '29.17%', '2': '39.24%', '3': '21.40%', '4': '10.19%'})		(2.34, {'1': '25.85%', '2': '37.14%', '3': '14.43%', '4': '22.58%'})	(2.67, {'1': '15.88%', '2': '34.80%', '3': '16.04%', '4': '33.28%'})	(2.39, {'1': '27.00%', '2': '30.54%', '3': '19.39%', '4': '23.07%'})	(1.78, {'1': '47.78%', '2': '35.07%', '3': '8.67%', '4': '8.48%'})	(2.31, {'1': '24.48%', '2': '36.39%', '3': '22.38%', '4': '16.75%'})		(1.77, {'1': '54.27%', '2': '27.52%', '3': '5.22%', '4': '12.99%'})	(2.77, {'1': '9.05%', '2': '31.40%', '3': '32.64%', '4': '26.92%'})	(1.76, {'1': '46.70%', '2': '38.38%', '3': '7.25%', '4': '7.68%'})	(2.09, {'1': '32.03%', '2': '39.69%', '3': '15.18%', '4': '13.09%'})	(2.6, {'1': '9.21%', '2': '44.76%', '3': '22.38%', '4': '23.66%'})	(N/A, {})	(2.06, {'1': '26.18%', '2': '48.16%', '3': '19.31%', '4': '6.35%'})	(N/A, {})	418	GOVERNANCE & POLITICAL SYSTEMS
(2.1, {'1': '27.12%', '2': '45.76%', '3': '16.97%', '4': '10.15%'})		(2.32, {'1': '26.44%', '2': '35.21%', '3': '17.79%', '4': '20.55%'})	(2.63, {'1': '17.99%', '2': '34.02%', '3': '15.47%', '4': '32.52%'})	(2.21, {'1': '35.15%', '2': '29.19%', '3': '15.10%', '4': '20.56%'})	(1.76, {'1': '51.33%', '2': '30.49%', '3': '8.71%', '4': '9.47%'})	(2.21, {'1': '29.17%', '2': '36.07%', '3': '19.79%', '4': '14.97%'})		(1.71, {'1': '58.83%', '2': '23.51%', '3': '5.46%', '4': '12.20%'})	(2.7, {'1': '11.45%', '2': '31.92%', '3': '31.86%', '4': '24.78%'})	(1.62, {'1': '56.22%', '2': '31.95%', '3': '5.60%', '4': '6.22%'})	(2.04, {'1': '31.51%', '2': '45.34%', '3': '10.68%', '4': '12.47%'})	(2.61, {'1': '9.44%', '2': '43.75%', '3': '22.70%', '4': '24.11%'})	(N/A, {})	(2.03, {'1': '27.36%', '2': '49.05%', '3': '16.77%', '4': '6.81%'})	(N/A, {})	419	GOVERNANCE & POLITICAL SYSTEMS
(2.04, {'1': '35.51%', '2': '33.72%', '3': '21.92%', '4': '8.85%'})		(2.27, {'1': '32.75%', '2': '29.99%', '3': '14.81%', '4': '22.46%'})	(2.39, {'1': '26.61%', '2': '34.33%', '3': '12.15%', '4': '26.91%'})	(2.08, {'1': '42.10%', '2': '25.54%', '3': '14.66%', '4': '17.70%'})	(1.88, {'1': '47.72%', '2': '28.90%', '3': '11.22%', '4': '12.17%'})	(2.33, {'1': '26.29%', '2': '32.63%', '3': '22.46%', '4': '18.63%'})		(1.51, {'1': '70.49%', '2': '16.39%', '3': '4.79%', '4': '8.32%'})	(2.59, {'1': '15.20%', '2': '34.69%', '3': '26.02%', '4': '24.09%'})	(1.68, {'1': '55.20%', '2': '30.15%', '3': '6.58%', '4': '8.07%'})	(2.23, {'1': '27.34%', '2': '39.70%', '3': '15.52%', '4': '17.45%'})	(2.84, {'1': '7.62%', '2': '33.59%', '3': '25.97%', '4': '32.82%'})	(N/A, {})	(2.02, {'1': '30.15%', '2': '45.73%', '3': '16.58%', '4': '7.54%'})	(N/A, {})	420	GOVERNANCE & POLITICAL SYSTEMS
(2.06, {'1': '32.01%', '2': '37.53%', '3': '22.62%', '4': '7.84%'})		(1.86, {'1': '43.98%', '2': '36.22%', '3': '9.27%', '4': '10.53%'})	(1.95, {'1': '43.73%', '2': '31.24%', '3': '11.56%', '4': '13.47%'})	(1.61, {'1': '62.60%', '2': '20.31%', '3': '10.54%', '4': '6.56%'})	(1.68, {'1': '54.60%', '2': '30.14%', '3': '7.63%', '4': '7.63%'})	(2.3, {'1': '24.59%', '2': '34.38%', '3': '27.45%', '4': '13.59%'})		(1.65, {'1': '60.62%', '2': '23.45%', '3': '5.83%', '4': '10.10%'})	(1.69, {'1': '43.26%', '2': '47.06%', '3': '6.72%', '4': '2.97%'})	(2.48, {'1': '25.84%', '2': '28.73%', '3': '17.15%', '4': '28.29%'})	(1.95, {'1': '38.90%', '2': '38.90%', '3': '10.96%', '4': '11.23%'})	(2.03, {'1': '31.30%', '2': '45.06%', '3': '13.12%', '4': '10.52%'})	(N/A, {})	(1.97, {'1': '31.90%', '2': '43.51%', '3': '20.05%', '4': '4.54%'})	(N/A, {})	421	GOVERNANCE & POLITICAL SYSTEMS
(2.31, {'1': '21.72%', '2': '36.60%', '3': '30.97%', '4': '10.72%'})		(1.82, {'1': '51.57%', '2': '27.42%', '3': '8.68%', '4': '12.33%'})	(2.07, {'1': '41.94%', '2': '26.31%', '3': '14.70%', '4': '17.05%'})	(1.66, {'1': '62.26%', '2': '18.93%', '3': '8.89%', '4': '9.91%'})	(1.87, {'1': '50.79%', '2': '25.10%', '3': '10.67%', '4': '13.44%'})	(2.37, {'1': '21.60%', '2': '36.27%', '3': '26.13%', '4': '16.00%'})		(2.04, {'1': '54.37%', '2': '13.30%', '3': '6.39%', '4': '25.95%'})	(2.37, {'1': '24.15%', '2': '35.83%', '3': '18.68%', '4': '21.34%'})	(2.68, {'1': '22.54%', '2': '23.50%', '3': '17.75%', '4': '36.21%'})	(2.28, {'1': '27.08%', '2': '34.72%', '3': '21.11%', '4': '17.08%'})	(2.16, {'1': '29.68%', '2': '40.11%', '3': '14.91%', '4': '15.30%'})	(N/A, {})	(2.11, {'1': '27.78%', '2': '41.41%', '3': '22.47%', '4': '8.33%'})	(N/A, {})	422	GOVERNANCE & POLITICAL SYSTEMS
(2.32, {'1': '19.95%', '2': '39.36%', '3': '29.65%', '4': '11.04%'})		(2.06, {'1': '37.72%', '2': '34.43%', '3': '12.41%', '4': '15.44%'})	(2.2, {'1': '30.15%', '2': '36.47%', '3': '16.39%', '4': '16.99%'})	(1.85, {'1': '49.87%', '2': '25.13%', '3': '15.46%', '4': '9.54%'})	(1.9, {'1': '46.85%', '2': '30.12%', '3': '9.65%', '4': '13.39%'})	(2.36, {'1': '22.28%', '2': '35.87%', '3': '25.68%', '4': '16.17%'})		(2.04, {'1': '51.08%', '2': '16.08%', '3': '10.81%', '4': '22.03%'})	(2.49, {'1': '20.90%', '2': '33.13%', '3': '22.20%', '4': '23.77%'})	(2.49, {'1': '25.75%', '2': '28.00%', '3': '17.50%', '4': '28.75%'})	(2.28, {'1': '25.94%', '2': '38.08%', '3': '17.85%', '4': '18.13%'})	(2.3, {'1': '22.50%', '2': '40.66%', '3': '20.92%', '4': '15.92%'})	(N/A, {})	(2.13, {'1': '26.68%', '2': '41.97%', '3': '23.01%', '4': '8.34%'})	(N/A, {})	423	GOVERNANCE & POLITICAL SYSTEMS
(2.38, {'1': '23.20%', '2': '31.06%', '3': '30.28%', '4': '15.46%'})		(2.05, {'1': '42.68%', '2': '27.78%', '3': '11.89%', '4': '17.65%'})	(2.23, {'1': '33.74%', '2': '30.94%', '3': '14.12%', '4': '21.20%'})	(1.82, {'1': '57.97%', '2': '15.95%', '3': '12.15%', '4': '13.92%'})	(1.74, {'1': '54.90%', '2': '26.67%', '3': '7.65%', '4': '10.78%'})	(2.33, {'1': '23.04%', '2': '35.29%', '3': '27.43%', '4': '14.25%'})		(2.05, {'1': '52.31%', '2': '15.64%', '3': '7.18%', '4': '24.87%'})	(2.08, {'1': '29.25%', '2': '44.02%', '3': '15.94%', '4': '10.79%'})	(2.6, {'1': '26.62%', '2': '21.06%', '3': '17.59%', '4': '34.72%'})	(2.13, {'1': '32.73%', '2': '36.49%', '3': '16.16%', '4': '14.62%'})	(2.31, {'1': '24.26%', '2': '38.06%', '3': '20.26%', '4': '17.42%'})	(N/A, {})	(2.1, {'1': '26.02%', '2': '43.53%', '3': '25.00%', '4': '5.46%'})	(N/A, {})	424	GOVERNANCE & POLITICAL SYSTEMS
(2.31, {'1': '23.32%', '2': '34.02%', '3': '30.80%', '4': '11.86%'})		(1.9, {'1': '43.45%', '2': '33.75%', '3': '11.96%', '4': '10.83%'})	(1.64, {'1': '57.52%', '2': '26.49%', '3': '10.42%', '4': '5.57%'})	(1.76, {'1': '50.70%', '2': '29.86%', '3': '12.45%', '4': '6.99%'})	(1.68, {'1': '56.88%', '2': '26.11%', '3': '8.91%', '4': '8.10%'})	(2.36, {'1': '21.93%', '2': '35.29%', '3': '27.14%', '4': '15.64%'})		(1.95, {'1': '54.40%', '2': '15.93%', '3': '9.97%', '4': '19.69%'})	(1.85, {'1': '33.15%', '2': '53.97%', '3': '7.62%', '4': '5.25%'})	(2.46, {'1': '27.18%', '2': '27.91%', '3': '16.50%', '4': '28.40%'})	(2.1, {'1': '30.61%', '2': '41.61%', '3': '14.81%', '4': '12.98%'})	(2.04, {'1': '29.26%', '2': '45.38%', '3': '17.17%', '4': '8.19%'})	(N/A, {})	(2.17, {'1': '22.62%', '2': '44.73%', '3': '25.92%', '4': '6.73%'})	(N/A, {})	425	GOVERNANCE & POLITICAL SYSTEMS
(2.09, {'1': '24.07%', '2': '50.06%', '3': '18.28%', '4': '7.59%'})		(2.32, {'1': '25.85%', '2': '36.26%', '3': '17.57%', '4': '20.33%'})	(2.61, {'1': '16.19%', '2': '33.36%', '3': '23.93%', '4': '26.52%'})	(2.23, {'1': '27.10%', '2': '37.28%', '3': '21.25%', '4': '14.38%'})	(2.05, {'1': '37.26%', '2': '35.36%', '3': '12.17%', '4': '15.21%'})	(2.64, {'1': '12.94%', '2': '33.15%', '3': '30.59%', '4': '23.32%'})		(1.98, {'1': '48.80%', '2': '22.56%', '3': '10.01%', '4': '18.63%'})	(2.67, {'1': '1.84%', '2': '48.36%', '3': '31.24%', '4': '18.55%'})	(1.97, {'1': '42.52%', '2': '33.02%', '3': '9.50%', '4': '14.96%'})	(2.14, {'1': '26.39%', '2': '45.56%', '3': '15.97%', '4': '12.08%'})	(2.52, {'1': '11.28%', '2': '42.28%', '3': '29.18%', '4': '17.25%'})	(N/A, {})	(1.93, {'1': '31.10%', '2': '49.56%', '3': '14.92%', '4': '4.42%'})	(N/A, {})	426	GOVERNANCE & POLITICAL SYSTEMS
(1.59, {'1': '53.18%', '2': '34.48%', '3': '12.34%'})		(1.64, {'1': '39.02%', '2': '57.97%', '3': '3.01%'})	(1.8, {'1': '37.22%', '2': '45.94%', '3': '16.84%'})	(1.65, {'1': '48.42%', '2': '37.90%', '3': '13.69%'})	(1.57, {'1': '47.86%', '2': '46.93%', '3': '5.21%'})	(1.72, {'1': '48.87%', '2': '30.20%', '3': '20.93%'})		(1.62, {'1': '42.82%', '2': '52.69%', '3': '4.49%'})	(2.17, {'1': '7.28%', '2': '68.59%', '3': '24.13%'})	(1.47, {'1': '59.03%', '2': '35.42%', '3': '5.56%'})	(1.44, {'1': '65.02%', '2': '26.44%', '3': '8.54%'})	(1.82, {'1': '42.75%', '2': '32.99%', '3': '24.26%'})	(1.53, {'1': '55.70%', '2': '35.74%', '3': '8.56%'})	(1.34, {'1': '71.93%', '2': '21.80%', '3': '6.27%'})	(1.85, {'1': '38.30%', '2': '38.05%', '3': '23.65%'})	427	GOVERNANCE & POLITICAL SYSTEMS
(2.42, {'1': '8.79%', '2': '50.00%', '3': '31.46%', '4': '9.75%'})		(2.81, {'1': '9.40%', '2': '29.57%', '3': '31.83%', '4': '29.20%'})	(2.99, {'1': '9.35%', '2': '22.26%', '3': '28.67%', '4': '39.73%'})	(2.56, {'1': '19.35%', '2': '26.75%', '3': '32.08%', '4': '21.82%'})	(2.74, {'1': '18.97%', '2': '19.96%', '3': '29.64%', '4': '31.42%'})	(2.73, {'1': '8.87%', '2': '30.07%', '3': '40.26%', '4': '20.79%'})		(2.99, {'1': '12.55%', '2': '17.44%', '3': '28.27%', '4': '41.74%'})	(3.43, {'2': '2.58%', '3': '51.40%', '4': '46.02%'})	(N/A, {})	(2.72, {'1': '10.58%', '2': '31.62%', '3': '32.87%', '4': '24.93%'})	(2.99, {'1': '4.00%', '2': '23.87%', '3': '41.20%', '4': '30.93%'})	(N/A, {})	(2.66, {'1': '7.64%', '2': '33.76%', '3': '43.69%', '4': '14.90%'})	(N/A, {})	428	GOVERNANCE & POLITICAL SYSTEMS
(2.86, {'1': '4.03%', '2': '28.99%', '3': '43.76%', '4': '23.22%'})		(3.08, {'1': '5.03%', '2': '21.11%', '3': '34.67%', '4': '39.20%'})	(3.43, {'1': '3.02%', '2': '10.39%', '3': '27.61%', '4': '58.98%'})	(3.15, {'1': '4.27%', '2': '16.84%', '3': '38.21%', '4': '40.67%'})	(3.06, {'1': '10.89%', '2': '15.73%', '3': '30.24%', '4': '43.15%'})	(2.95, {'1': '7.43%', '2': '20.95%', '3': '40.81%', '4': '30.81%'})		(3.26, {'1': '7.70%', '2': '12.08%', '3': '26.69%', '4': '53.52%'})	(3.46, {'2': '1.15%', '3': '52.02%', '4': '46.82%'})	(2.03, {'1': '37.27%', '2': '35.12%', '3': '15.28%', '4': '12.33%'})	(3.02, {'1': '5.38%', '2': '21.95%', '3': '38.10%', '4': '34.56%'})	(3.34, {'1': '0.67%', '2': '10.96%', '3': '42.51%', '4': '45.86%'})	(N/A, {})	(2.82, {'1': '4.08%', '2': '32.23%', '3': '41.27%', '4': '22.42%'})	(N/A, {})	429	GOVERNANCE & POLITICAL SYSTEMS
(3.67, {'1': '3.80%', '2': '12.70%', '3': '28.66%', '4': '22.51%', '5': '32.33%'})		(3.37, {'1': '9.54%', '2': '15.31%', '3': '31.62%', '4': '15.43%', '5': '28.11%'})	(3.9, {'1': '6.73%', '2': '10.54%', '3': '17.27%', '4': '17.34%', '5': '48.12%'})	(3.56, {'1': '6.63%', '2': '11.18%', '3': '29.78%', '4': '24.58%', '5': '27.83%'})	(2.73, {'1': '16.74%', '2': '21.34%', '3': '43.51%', '4': '8.79%', '5': '9.62%'})	(3.45, {'1': '5.07%', '2': '13.01%', '3': '31.64%', '4': '32.19%', '5': '18.08%'})		(3.77, {'1': '9.68%', '2': '6.63%', '3': '25.07%', '4': '14.59%', '5': '44.03%'})	(3.65, {'1': '0.33%', '3': '52.33%', '4': '29.41%', '5': '17.93%'})	(3.1, {'1': '9.49%', '2': '11.81%', '3': '48.38%', '4': '19.91%', '5': '10.42%'})	(3.19, {'1': '11.38%', '2': '16.17%', '3': '32.49%', '4': '21.56%', '5': '18.41%'})	(3.76, {'1': '3.11%', '2': '8.53%', '3': '28.82%', '4': '28.55%', '5': '30.99%'})	(N/A, {})	(3.29, {'1': '4.00%', '2': '11.73%', '3': '49.33%', '4': '21.47%', '5': '13.47%'})	(N/A, {})	430	GOVERNANCE & POLITICAL SYSTEMS
(2.59, {'1': '20.56%', '2': '25.94%', '3': '33.87%', '4': '12.77%', '5': '6.85%'})		(3.04, {'1': '13.37%', '2': '14.38%', '3': '42.50%', '4': '14.12%', '5': '15.64%'})	(2.34, {'1': '36.41%', '2': '23.58%', '3': '20.85%', '4': '8.06%', '5': '11.10%'})	(2.06, {'1': '44.58%', '2': '22.22%', '3': '20.92%', '4': '7.45%', '5': '4.84%'})	(2.63, {'1': '26.83%', '2': '13.21%', '3': '42.07%', '4': '5.89%', '5': '11.99%'})	(2.44, {'1': '22.45%', '2': '29.61%', '3': '33.88%', '4': '9.09%', '5': '4.96%'})		(2.23, {'1': '51.42%', '2': '11.13%', '3': '17.50%', '4': '3.12%', '5': '16.82%'})	(2.26, {'1': '23.56%', '2': '28.55%', '3': '46.94%', '4': '0.33%', '5': '0.62%'})	(2.67, {'1': '20.88%', '2': '14.25%', '3': '49.63%', '4': '7.62%', '5': '7.62%'})	(2.87, {'1': '13.36%', '2': '23.35%', '3': '38.40%', '4': '12.44%', '5': '12.44%'})	(3.07, {'1': '7.85%', '2': '19.33%', '3': '43.46%', '4': '16.42%', '5': '12.94%'})	(N/A, {})	(2.34, {'1': '28.89%', '2': '25.57%', '3': '32.22%', '4': '8.92%', '5': '4.39%'})	(N/A, {})	431	GOVERNANCE & POLITICAL SYSTEMS
(1.99, {'1': '37.42%', '2': '35.90%', '3': '16.56%', '4': '10.11%'})		(1.8, {'1': '48.50%', '2': '31.20%', '3': '11.78%', '4': '8.52%'})	(1.74, {'1': '55.11%', '2': '25.70%', '3': '9.48%', '4': '9.70%'})	(1.64, {'1': '59.54%', '2': '24.94%', '3': '7.25%', '4': '8.27%'})	(1.67, {'1': '60.11%', '2': '23.19%', '3': '6.49%', '4': '10.20%'})	(2.13, {'1': '34.61%', '2': '30.91%', '3': '21.53%', '4': '12.95%'})		(1.44, {'1': '76.07%', '2': '11.96%', '3': '4.03%', '4': '7.93%'})	(1.95, {'1': '51.39%', '2': '21.30%', '3': '8.56%', '4': '18.75%'})	(1.87, {'1': '48.04%', '2': '28.41%', '3': '12.47%', '4': '11.09%'})	(2.08, {'1': '32.56%', '2': '38.95%', '3': '16.57%', '4': '11.92%'})	(2.41, {'1': '19.76%', '2': '36.91%', '3': '26.18%', '4': '17.15%'})	(N/A, {})	(1.87, {'1': '39.33%', '2': '40.49%', '3': '13.62%', '4': '6.56%'})	(N/A, {})	432	GOVERNANCE & POLITICAL SYSTEMS
(2.78, {'1': '7.67%', '2': '30.82%', '3': '37.28%', '4': '24.23%'})		(2.87, {'1': '15.83%', '2': '21.73%', '3': '21.61%', '4': '40.83%'})	(3.4, {'1': '3.50%', '2': '14.33%', '3': '20.91%', '4': '61.25%'})	(3.2, {'1': '9.30%', '2': '16.54%', '3': '19.12%', '4': '55.04%'})	(2.22, {'1': '36.71%', '2': '25.62%', '3': '16.25%', '4': '21.41%'})	(2.82, {'1': '10.84%', '2': '28.11%', '3': '29.32%', '4': '31.73%'})		(2.68, {'1': '27.89%', '2': '18.25%', '3': '11.44%', '4': '42.42%'})	(3.34, {'1': '3.11%', '2': '9.64%', '3': '37.52%', '4': '49.73%'})	(1.82, {'1': '45.34%', '2': '35.77%', '3': '10.08%', '4': '8.82%'})	(2.66, {'1': '17.47%', '2': '28.82%', '3': '23.87%', '4': '29.84%'})	(3.32, {'1': '1.95%', '2': '16.02%', '3': '29.95%', '4': '52.08%'})	(N/A, {})	(2.31, {'1': '20.46%', '2': '41.18%', '3': '25.61%', '4': '12.74%'})	(N/A, {})	433	GOVERNANCE & POLITICAL SYSTEMS
(N/A, {})		(N/A, {})	(N/A, {})	(N/A, {})	(N/A, {})	(N/A, {})		(N/A, {})	(N/A, {})	(N/A, {})	(N/A, {})	(N/A, {})	(2.58, {'1': '21.53%', '2': '25.76%', '3': '25.93%', '4': '26.78%'})	(N/A, {})	(2.39, {'1': '21.57%', '2': '38.07%', '3': '20.30%', '4': '20.05%'})	434	GOVERNANCE & POLITICAL SYSTEMS
(2.24, {'1': '25.48%', '2': '37.64%', '3': '24.07%', '4': '12.80%'})		(2.05, {'1': '32.42%', '2': '39.55%', '3': '19.02%', '4': '9.01%'})	(2.1, {'1': '23.72%', '2': '51.79%', '3': '14.98%', '4': '9.51%'})	(2.09, {'1': '26.06%', '2': '46.45%', '3': '19.87%', '4': '7.61%'})	(2.14, {'1': '26.60%', '2': '42.33%', '3': '21.75%', '4': '9.32%'})	(2.56, {'1': '16.71%', '2': '29.51%', '3': '35.31%', '4': '18.46%'})		(1.92, {'1': '44.20%', '2': '30.28%', '3': '14.95%', '4': '10.57%'})	(2.51, {'1': '22.50%', '2': '26.17%', '3': '28.67%', '4': '22.67%'})	(2.98, {'1': '13.61%', '2': '15.59%', '3': '29.95%', '4': '40.84%'})	(2.37, {'1': '19.77%', '2': '41.41%', '3': '21.36%', '4': '17.46%'})	(2.38, {'1': '18.39%', '2': '41.34%', '3': '24.56%', '4': '15.70%'})	(N/A, {})	(2.1, {'1': '28.59%', '2': '42.06%', '3': '20.20%', '4': '9.15%'})	(N/A, {})	435	GOVERNANCE & POLITICAL SYSTEMS
(2.11, {'1': '31.73%', '2': '35.27%', '3': '22.88%', '4': '10.11%'})		(1.88, {'1': '46.37%', '2': '32.21%', '3': '8.90%', '4': '12.53%'})	(2.84, {'1': '15.01%', '2': '26.34%', '3': '18.12%', '4': '40.53%'})	(2.18, {'1': '35.78%', '2': '30.21%', '3': '14.54%', '4': '19.47%'})	(1.63, {'1': '63.25%', '2': '19.43%', '3': '8.30%', '4': '9.01%'})	(2.21, {'1': '26.33%', '2': '40.60%', '3': '18.55%', '4': '14.53%'})		(1.98, {'1': '53.52%', '2': '16.83%', '3': '7.66%', '4': '21.98%'})	(3.28, {'1': '7.04%', '2': '5.30%', '3': '39.84%', '4': '47.82%'})	(1.86, {'1': '48.24%', '2': '29.74%', '3': '9.60%', '4': '12.41%'})	(2.06, {'1': '36.33%', '2': '34.67%', '3': '15.33%', '4': '13.67%'})	(2.66, {'1': '10.45%', '2': '38.45%', '3': '25.94%', '4': '25.16%'})	(N/A, {})	(1.97, {'1': '31.94%', '2': '46.77%', '3': '13.43%', '4': '7.86%'})	(N/A, {})	436	GOVERNANCE & POLITICAL SYSTEMS
(2.03, {'1': '37.69%', '2': '32.49%', '3': '19.42%', '4': '10.41%'})		(1.79, {'1': '50.31%', '2': '31.91%', '3': '6.51%', '4': '11.26%'})	(2.93, {'1': '12.55%', '2': '24.58%', '3': '19.75%', '4': '43.12%'})	(2.29, {'1': '31.73%', '2': '28.32%', '3': '18.84%', '4': '21.11%'})	(1.51, {'1': '69.88%', '2': '16.81%', '3': '5.78%', '4': '7.53%'})	(2.32, {'1': '23.80%', '2': '34.41%', '3': '28.20%', '4': '13.58%'})		(1.77, {'1': '59.82%', '2': '19.02%', '3': '5.16%', '4': '15.99%'})	(3.29, {'1': '6.18%', '2': '6.64%', '3': '39.04%', '4': '48.13%'})	(1.67, {'1': '56.61%', '2': '28.54%', '3': '6.26%', '4': '8.58%'})	(1.97, {'1': '39.40%', '2': '36.94%', '3': '10.94%', '4': '12.72%'})	(2.64, {'1': '10.51%', '2': '38.59%', '3': '26.79%', '4': '24.10%'})	(2.62, {'1': '11.11%', '2': '37.71%', '3': '28.96%', '4': '22.22%'})	(2.05, {'1': '28.61%', '2': '44.56%', '3': '20.13%', '4': '6.71%'})	(2.57, {'1': '12.44%', '2': '41.62%', '3': '22.08%', '4': '23.86%'})	437	GOVERNANCE & POLITICAL SYSTEMS
(1.83, {'1': '46.46%', '2': '32.07%', '3': '13.89%', '4': '7.58%'})		(1.62, {'1': '61.08%', '2': '25.91%', '3': '3.13%', '4': '9.89%'})	(2.51, {'1': '24.71%', '2': '30.86%', '3': '13.26%', '4': '31.17%'})	(1.99, {'1': '45.53%', '2': '25.66%', '3': '12.96%', '4': '15.85%'})	(1.35, {'1': '76.09%', '2': '16.40%', '3': '3.66%', '4': '3.84%'})	(1.97, {'1': '37.24%', '2': '36.07%', '3': '18.88%', '4': '7.81%'})		(1.46, {'1': '76.23%', '2': '11.19%', '3': '2.77%', '4': '9.81%'})	(3.24, {'1': '8.44%', '2': '5.70%', '3': '39.20%', '4': '46.66%'})	(1.41, {'1': '73.48%', '2': '18.20%', '3': '1.80%', '4': '6.52%'})	(1.75, {'1': '50.41%', '2': '33.42%', '3': '7.34%', '4': '8.83%'})	(2.39, {'1': '20.87%', '2': '39.56%', '3': '19.59%', '4': '19.97%'})	(2.42, {'1': '24.92%', '2': '29.29%', '3': '24.92%', '4': '20.88%'})	(1.84, {'1': '41.91%', '2': '39.52%', '3': '11.54%', '4': '7.03%'})	(N/A, {})	438	GOVERNANCE & POLITICAL SYSTEMS
(1.9, {'1': '46.77%', '2': '27.25%', '3': '15.34%', '4': '10.65%'})		(1.68, {'1': '55.94%', '2': '29.91%', '3': '4.51%', '4': '9.64%'})	(2.56, {'1': '22.41%', '2': '31.07%', '3': '14.19%', '4': '32.33%'})	(1.99, {'1': '47.22%', '2': '22.47%', '3': '14.52%', '4': '15.78%'})	(1.39, {'1': '75.52%', '2': '15.03%', '3': '4.72%', '4': '4.72%'})	(2.0, {'1': '36.84%', '2': '36.19%', '3': '16.86%', '4': '10.12%'})		(1.44, {'1': '78.62%', '2': '8.55%', '3': '3.14%', '4': '9.69%'})	(3.23, {'1': '8.16%', '2': '6.63%', '3': '39.49%', '4': '45.72%'})	(1.46, {'1': '70.36%', '2': '19.91%', '3': '2.94%', '4': '6.79%'})	(1.77, {'1': '48.19%', '2': '35.57%', '3': '7.38%', '4': '8.86%'})	(2.42, {'1': '17.29%', '2': '43.28%', '3': '19.33%', '4': '20.10%'})	(2.57, {'1': '20.47%', '2': '27.24%', '3': '27.24%', '4': '25.04%'})	(1.86, {'1': '38.69%', '2': '42.46%', '3': '12.81%', '4': '6.03%'})	(2.46, {'1': '16.71%', '2': '42.03%', '3': '20.00%', '4': '21.27%'})	439	GOVERNANCE & POLITICAL SYSTEMS
(2.05, {'1': '37.44%', '2': '31.35%', '3': '20.30%', '4': '10.91%'})		(1.82, {'1': '48.56%', '2': '32.42%', '3': '7.38%', '4': '11.64%'})	(2.56, {'1': '21.35%', '2': '32.57%', '3': '15.26%', '4': '30.83%'})	(2.11, {'1': '40.61%', '2': '25.85%', '3': '15.64%', '4': '17.91%'})	(1.43, {'1': '73.65%', '2': '16.06%', '3': '3.84%', '4': '6.46%'})	(2.28, {'1': '26.10%', '2': '35.71%', '3': '22.73%', '4': '15.45%'})		(1.59, {'1': '71.11%', '2': '11.43%', '3': '4.65%', '4': '12.81%'})	(3.27, {'1': '7.04%', '2': '6.01%', '3': '39.38%', '4': '47.56%'})	(1.43, {'1': '72.94%', '2': '17.20%', '3': '3.44%', '4': '6.42%'})	(2.05, {'1': '38.88%', '2': '32.61%', '3': '13.23%', '4': '15.28%'})	(2.74, {'1': '10.70%', '2': '33.25%', '3': '27.58%', '4': '28.48%'})	(2.5, {'1': '24.33%', '2': '25.00%', '3': '26.85%', '4': '23.83%'})	(1.93, {'1': '34.13%', '2': '44.96%', '3': '14.48%', '4': '6.42%'})	(2.48, {'1': '19.75%', '2': '34.68%', '3': '23.80%', '4': '21.77%'})	440	GOVERNANCE & POLITICAL SYSTEMS
(1.98, {'1': '41.54%', '2': '29.67%', '3': '18.31%', '4': '10.48%'})		(1.84, {'1': '49.00%', '2': '31.08%', '3': '7.02%', '4': '12.91%'})	(2.51, {'1': '22.51%', '2': '33.04%', '3': '15.02%', '4': '29.43%'})	(2.06, {'1': '45.65%', '2': '20.93%', '3': '15.51%', '4': '17.91%'})	(1.53, {'1': '69.11%', '2': '17.80%', '3': '4.36%', '4': '8.73%'})	(2.37, {'1': '26.78%', '2': '29.95%', '3': '22.43%', '4': '20.84%'})		(1.45, {'1': '76.04%', '2': '11.92%', '3': '3.14%', '4': '8.91%'})	(3.27, {'1': '7.21%', '2': '5.80%', '3': '40.22%', '4': '46.76%'})	(1.42, {'1': '72.17%', '2': '18.87%', '3': '3.30%', '4': '5.66%'})	(2.16, {'1': '37.38%', '2': '26.47%', '3': '18.55%', '4': '17.60%'})	(2.87, {'1': '7.91%', '2': '28.27%', '3': '33.20%', '4': '30.61%'})	(2.57, {'1': '18.37%', '2': '27.38%', '3': '33.33%', '4': '20.92%'})	(1.97, {'1': '36.03%', '2': '39.32%', '3': '16.69%', '4': '7.96%'})	(2.45, {'1': '21.43%', '2': '33.67%', '3': '22.96%', '4': '21.94%'})	441	GOVERNANCE & POLITICAL SYSTEMS
(1.77, {'1': '51.89%', '2': '28.41%', '3': '10.86%', '4': '8.84%'})		(1.67, {'1': '57.45%', '2': '28.66%', '3': '3.63%', '4': '10.26%'})	(2.51, {'1': '22.13%', '2': '33.81%', '3': '15.22%', '4': '28.83%'})	(1.9, {'1': '53.89%', '2': '18.47%', '3': '11.06%', '4': '16.58%'})	(1.37, {'1': '77.14%', '2': '13.96%', '3': '3.32%', '4': '5.58%'})	(1.89, {'1': '44.42%', '2': '31.58%', '3': '14.76%', '4': '9.24%'})		(1.32, {'1': '83.71%', '2': '7.52%', '3': '1.88%', '4': '6.89%'})	(3.25, {'1': '6.99%', '2': '7.51%', '3': '39.27%', '4': '46.23%'})	(1.4, {'1': '74.60%', '2': '16.78%', '3': '2.95%', '4': '5.67%'})	(1.76, {'1': '49.53%', '2': '34.01%', '3': '7.02%', '4': '9.45%'})	(2.37, {'1': '19.38%', '2': '42.11%', '3': '20.54%', '4': '17.97%'})	(2.51, {'1': '17.66%', '2': '32.94%', '3': '29.71%', '4': '19.69%'})	(1.8, {'1': '42.55%', '2': '40.28%', '3': '11.49%', '4': '5.68%'})	(2.33, {'1': '25.82%', '2': '35.44%', '3': '18.48%', '4': '20.25%'})	442	GOVERNANCE & POLITICAL SYSTEMS
(N/A, {})		(N/A, {})	(N/A, {})	(N/A, {})	(N/A, {})	(N/A, {})		(N/A, {})	(N/A, {})	(N/A, {})	(N/A, {})	(N/A, {})	(N/A, {})	(N/A, {})	(N/A, {})	443	GOVERNANCE & POLITICAL SYSTEMS
(1, {'1': '37.04%', '2': '9.54%', '3': '5.27%', '4': '25.67%', '5': '7.78%', '6': '7.91%', '8': '3.39%', '10': '0.44%', '11': '1.19%', '12': '0.19%', '13': '1.13%', '14': '0.44%'})		(1, {'1': '33.86%', '2': '13.37%', '3': '4.26%', '4': '27.82%', '5': '2.67%', '6': '12.48%', '8': '1.53%', '10': '0.76%', '11': '1.08%', '12': '0.13%', '13': '1.08%', '14': '0.95%'})	(1, {'1': '34.69%', '2': '14.17%', '3': '1.82%', '4': '17.87%', '5': '2.59%', '6': '26.69%', '8': '0.88%', '10': '0.25%', '11': '0.31%', '12': '0.08%', '13': '0.57%', '14': '0.08%'})	(1, {'1': '27.75%', '2': '17.60%', '3': '1.99%', '4': '22.29%', '5': '7.13%', '6': '13.42%', '8': '1.86%', '10': '1.09%', '11': '1.93%', '13': '0.77%', '14': '4.17%'})	(4, {'1': '27.86%', '2': '10.82%', '3': '2.34%', '4': '39.77%', '5': '5.41%', '6': '6.85%', '8': '3.34%', '10': '0.36%', '11': '0.54%', '12': '0.09%', '13': '0.63%', '14': '1.98%'})	(1, {'1': '26.43%', '2': '17.73%', '3': '5.64%', '4': '10.89%', '5': '4.65%', '6': '10.69%', '8': '2.79%', '10': '4.52%', '11': '3.92%', '12': '4.65%', '13': '3.85%', '14': '4.25%'})		(1, {'1': '43.15%', '2': '13.18%', '3': '2.59%', '4': '22.28%', '5': '2.66%', '6': '7.99%', '8': '2.74%', '10': '0.81%', '11': '1.70%', '12': '0.07%', '13': '1.11%', '14': '1.70%'})	(1, {'1': '39.09%', '2': '20.24%', '3': '6.17%', '4': '23.49%', '5': '2.43%', '6': '3.89%', '8': '3.83%', '10': '0.45%', '11': '0.14%', '13': '0.28%'})	(1, {'1': '56.04%', '2': '14.58%', '3': '9.03%', '4': '5.22%', '5': '3.92%', '6': '6.86%', '8': '0.87%', '11': '0.76%', '12': '0.33%', '13': '0.33%', '14': '2.07%'})	(1, {'1': '41.50%', '2': '15.83%', '3': '4.23%', '4': '8.73%', '5': '7.95%', '6': '15.18%', '8': '3.39%', '10': '0.39%', '11': '1.24%', '12': '0.39%', '13': '0.46%', '14': '0.72%'})	(4, {'1': '28.23%', '2': '6.14%', '3': '1.36%', '4': '40.44%', '5': '3.49%', '6': '16.09%', '8': '1.36%', '10': '0.45%', '11': '0.78%', '13': '0.32%', '14': '1.36%'})	(1, {'1': '51.17%', '2': '25.13%', '3': '8.12%', '4': '4.61%', '5': '3.27%', '6': '3.27%', '8': '0.25%', '10': '1.01%', '11': '0.67%', '12': '0.84%', '13': '1.51%', '14': '0.17%'})	(1, {'1': '66.39%', '2': '11.39%', '3': '3.16%', '4': '6.90%', '5': '2.15%', '6': '5.63%', '8': '2.72%', '10': '0.38%', '11': '0.57%', '12': '0.06%', '13': '0.51%', '14': '0.13%'})	(1, {'1': '71.21%', '2': '15.52%', '3': '1.88%', '4': '5.38%', '5': '1.25%', '6': '3.13%', '10': '0.38%', '11': '0.38%', '13': '0.75%', '14': '0.13%'})	444	GOVERNANCE & POLITICAL SYSTEMS
(2, {'1': '15.41%', '2': '29.80%', '3': '4.48%', '4': '10.25%', '5': '13.03%', '6': '9.30%', '8': '5.36%', '10': '1.90%', '11': '4.14%', '12': '0.48%', '13': '4.28%', '14': '1.56%'})		(4, {'1': '22.56%', '2': '21.30%', '3': '9.68%', '4': '23.83%', '5': '5.14%', '6': '12.15%', '8': '2.40%', '10': '0.67%', '11': '0.93%', '12': '0.07%', '13': '0.60%', '14': '0.67%'})	(2, {'1': '27.37%', '2': '39.83%', '3': '3.22%', '4': '14.92%', '5': '3.60%', '6': '7.72%', '8': '1.05%', '10': '0.48%', '11': '0.84%', '13': '0.82%', '14': '0.15%'})	(2, {'1': '20.99%', '2': '24.08%', '3': '3.94%', '4': '12.89%', '5': '7.89%', '6': '11.41%', '8': '3.38%', '10': '2.46%', '11': '2.89%', '12': '0.70%', '13': '2.32%', '14': '7.04%'})	(2, {'1': '23.47%', '2': '30.94%', '3': '5.53%', '4': '14.84%', '5': '9.02%', '6': '9.70%', '8': '3.69%', '10': '0.19%', '11': '0.68%', '12': '0.10%', '13': '0.78%', '14': '1.07%'})	(2, {'1': '15.36%', '2': '25.92%', '3': '5.49%', '4': '7.21%', '5': '6.87%', '6': '8.33%', '8': '3.78%', '10': '5.15%', '11': '6.01%', '12': '5.75%', '13': '6.09%', '14': '4.03%'})		(2, {'1': '23.52%', '2': '38.19%', '3': '5.51%', '4': '11.91%', '5': '5.12%', '6': '6.69%', '8': '3.25%', '10': '0.79%', '11': '1.57%', '12': '0.30%', '13': '1.08%', '14': '2.07%'})	(2, {'1': '12.73%', '2': '41.98%', '3': '10.91%', '4': '14.24%', '5': '4.86%', '6': '6.93%', '8': '6.75%', '10': '0.73%', '12': '0.21%', '13': '0.49%', '14': '0.17%'})	(2, {'1': '31.19%', '2': '41.40%', '3': '12.31%', '4': '4.34%', '5': '2.52%', '6': '3.78%', '8': '1.68%', '11': '0.42%', '12': '0.14%', '13': '0.98%', '14': '1.26%'})	(2, {'1': '15.12%', '2': '37.08%', '3': '8.44%', '4': '11.53%', '5': '8.00%', '6': '7.78%', '8': '3.82%', '10': '1.54%', '11': '2.06%', '12': '0.81%', '13': '1.76%', '14': '2.06%'})	(1, {'1': '29.83%', '2': '18.14%', '3': '5.44%', '4': '17.56%', '5': '8.27%', '6': '9.87%', '8': '2.32%', '10': '0.94%', '11': '1.52%', '12': '0.22%', '13': '1.74%', '14': '4.14%'})	(2, {'1': '14.88%', '2': '36.36%', '3': '11.38%', '4': '8.64%', '5': '9.41%', '6': '5.05%', '8': '2.74%', '10': '4.53%', '11': '2.65%', '12': '1.03%', '13': '2.91%', '14': '0.43%'})	(2, {'1': '14.55%', '2': '51.58%', '3': '5.99%', '4': '9.63%', '5': '3.37%', '6': '5.72%', '8': '3.77%', '10': '0.74%', '11': '1.14%', '12': '0.34%', '13': '2.09%', '14': '1.08%'})	(2, {'1': '23.46%', '2': '60.03%', '3': '6.55%', '4': '2.23%', '5': '1.44%', '6': '2.75%', '8': '0.26%', '10': '0.13%', '11': '0.52%', '13': '1.83%', '14': '0.79%'})	445	GOVERNANCE & POLITICAL SYSTEMS
(N/A, {})		(N/A, {})	(N/A, {})	(N/A, {})	(N/A, {})	(N/A, {})		(N/A, {})	(N/A, {})	(N/A, {})	(N/A, {})	(N/A, {})	(N/A, {})	(N/A, {})	(N/A, {})	446	GOVERNANCE & POLITICAL SYSTEMS
(2.68, {'1': '13.86%', '2': '26.68%', '3': '37.08%', '4': '22.38%'})		(3.05, {'1': '11.83%', '2': '16.83%', '3': '25.99%', '4': '45.36%'})	(3.3, {'1': '6.51%', '2': '15.07%', '3': '19.84%', '4': '58.58%'})	(2.92, {'1': '9.82%', '2': '25.11%', '3': '28.37%', '4': '36.69%'})	(3.29, {'1': '6.24%', '2': '11.09%', '3': '29.91%', '4': '52.77%'})	(2.81, {'1': '11.71%', '2': '27.86%', '3': '27.70%', '4': '32.73%'})		(3.05, {'1': '12.95%', '2': '15.34%', '3': '25.53%', '4': '46.18%'})	(3.43, {'1': '0.18%', '2': '8.35%', '3': '39.94%', '4': '51.53%'})	(3.12, {'1': '11.49%', '2': '16.83%', '3': '20.02%', '4': '51.66%'})	(N/A, {})	(2.77, {'1': '11.73%', '2': '28.56%', '3': '30.44%', '4': '29.27%'})	(2.26, {'1': '21.25%', '2': '44.12%', '3': '21.97%', '4': '12.66%'})	(2.57, {'1': '16.41%', '2': '35.56%', '3': '22.71%', '4': '25.31%'})	(2.73, {'1': '18.79%', '2': '21.09%', '3': '28.95%', '4': '31.17%'})	447	GOVERNANCE & POLITICAL SYSTEMS
(N/A, {})		(N/A, {})	(N/A, {})	(N/A, {})	(N/A, {})	(N/A, {})		(N/A, {})	(N/A, {})	(N/A, {})	(N/A, {})	(N/A, {})	(N/A, {})	(N/A, {})	(N/A, {})	448	GOVERNANCE & POLITICAL SYSTEMS
(2.42, {'1': '19.77%', '2': '39.03%', '3': '20.28%', '4': '20.92%'})		(2.85, {'1': '11.25%', '2': '29.38%', '3': '22.63%', '4': '36.75%'})	(3.3, {'1': '4.13%', '2': '17.87%', '3': '21.69%', '4': '56.31%'})	(2.85, {'1': '10.49%', '2': '27.24%', '3': '29.54%', '4': '32.74%'})	(3.12, {'1': '4.18%', '2': '23.57%', '3': '28.14%', '4': '44.11%'})	(2.64, {'1': '13.69%', '2': '32.21%', '3': '30.20%', '4': '23.89%'})		(3.34, {'1': '7.74%', '2': '16.93%', '3': '9.19%', '4': '66.14%'})	(2.81, {'1': '0.57%', '2': '37.58%', '3': '41.79%', '4': '20.06%'})	(1.86, {'1': '45.35%', '2': '31.83%', '3': '14.11%', '4': '8.71%'})	(N/A, {})	(N/A, {})	(2.1, {'1': '20.30%', '2': '54.31%', '3': '20.64%', '4': '4.74%'})	(2.21, {'1': '20.35%', '2': '47.66%', '3': '22.88%', '4': '9.10%'})	(1.84, {'1': '27.10%', '2': '62.87%', '3': '8.94%', '4': '1.08%'})	449	GOVERNANCE & POLITICAL SYSTEMS
(1.64, {'1': '35.53%', '2': '64.47%'})		(1.59, {'1': '40.99%', '2': '59.01%'})	(1.7, {'1': '29.95%', '2': '70.05%'})	(1.48, {'1': '52.37%', '2': '47.63%'})	(N/A, {})	(1.6, {'1': '40.17%', '2': '59.83%'})		(N/A, {})	(1.71, {'1': '29.39%', '2': '70.61%'})	(N/A, {})	(N/A, {})	(N/A, {})	(N/A, {})	(1.32, {'1': '67.96%', '2': '32.04%'})	(1.41, {'1': '58.89%', '2': '41.11%'})	450	GOVERNANCE & POLITICAL SYSTEMS
(1.79, {'1': '38.43%', '2': '44.39%', '3': '17.19%'})		(2.41, {'1': '16.09%', '2': '26.63%', '3': '57.28%'})	(2.33, {'1': '16.87%', '2': '32.78%', '3': '50.35%'})	(2.46, {'1': '12.26%', '2': '29.71%', '3': '58.03%'})	(N/A, {})	(2.21, {'1': '24.52%', '2': '29.81%', '3': '45.68%'})		(N/A, {})	(2.03, {'1': '29.43%', '2': '38.48%', '3': '32.09%'})	(N/A, {})	(N/A, {})	(N/A, {})	(N/A, {})	(2.15, {'1': '21.85%', '2': '41.00%', '3': '37.15%'})	(1.21, {'1': '81.45%', '2': '16.44%', '3': '2.11%'})	451	GOVERNANCE & POLITICAL SYSTEMS
(1.37, {'1': '62.91%', '2': '37.09%'})		(1.52, {'1': '47.65%', '2': '52.35%'})	(1.65, {'1': '34.77%', '2': '65.23%'})	(1.45, {'1': '54.59%', '2': '45.41%'})	(1.5, {'1': '49.79%', '2': '50.21%'})	(1.5, {'1': '50.02%', '2': '49.98%'})		(1.36, {'1': '63.89%', '2': '36.11%'})	(1.6, {'1': '39.65%', '2': '60.35%'})	(1.68, {'1': '31.54%', '2': '68.46%'})	(1.42, {'1': '57.85%', '2': '42.15%'})	(1.54, {'1': '45.59%', '2': '54.41%'})	(1.28, {'1': '71.71%', '2': '28.29%'})	(1.29, {'1': '70.66%', '2': '29.34%'})	(1.33, {'1': '67.07%', '2': '32.93%'})	452	GOVERNANCE & POLITICAL SYSTEMS
(1, {'1': '21.98%', '2': '13.33%', '3': '14.57%', '4': '14.32%', '5': '8.64%', '6': '7.04%', '7': '7.53%', '12': '1.48%', '14': '0.49%', '20': '6.54%', '21': '4.07%'})		(1, {'1': '42.66%', '2': '24.39%', '3': '11.75%', '4': '8.73%', '5': '7.26%', '6': '1.96%', '7': '1.71%', '17': '0.08%', '20': '0.82%', '21': '0.65%'})	(1, {'1': '47.20%', '2': '6.05%', '3': '18.15%', '4': '12.12%', '5': '5.99%', '6': '3.18%', '7': '0.91%', '12': '0.05%', '14': '1.56%', '20': '2.90%', '21': '1.90%'})	(1, {'1': '33.67%', '2': '18.42%', '3': '16.48%', '4': '10.34%', '5': '8.39%', '6': '8.90%', '7': '0.51%', '12': '0.20%', '17': '1.13%', '20': '1.43%', '21': '0.51%'})	(2, {'1': '29.11%', '2': '31.85%', '3': '9.79%', '4': '7.18%', '5': '10.18%', '6': '7.18%', '7': '0.91%', '18': '1.04%', '20': '1.83%', '21': '0.91%'})	(6, {'1': '13.37%', '2': '9.40%', '3': '13.11%', '4': '11.99%', '5': '11.82%', '6': '15.70%', '7': '10.61%', '16': '0.86%', '20': '9.75%', '21': '3.36%'})		(1, {'1': '46.15%', '2': '7.83%', '3': '4.84%', '4': '20.37%', '5': '4.27%', '6': '9.83%', '7': '2.28%', '12': '0.85%', '14': '1.57%', '17': '0.28%', '20': '0.71%', '21': '1.00%'})	(6, {'1': '10.39%', '2': '9.54%', '3': '14.36%', '4': '12.93%', '5': '9.59%', '6': '24.63%', '7': '7.11%', '20': '8.84%', '21': '2.60%'})	(6, {'1': '20.00%', '2': '27.10%', '3': '4.52%', '4': '3.23%', '5': '2.58%', '6': '35.48%', '7': '0.65%', '12': '3.87%', '20': '2.58%'})	(1, {'1': '26.67%', '2': '22.14%', '3': '14.88%', '4': '11.19%', '5': '7.26%', '6': '11.43%', '7': '3.33%', '14': '0.12%', '17': '0.12%', '20': '2.38%', '21': '0.48%'})	(1, {'1': '43.50%', '2': '8.34%', '3': '14.23%', '4': '11.45%', '5': '7.85%', '6': '4.42%', '7': '3.60%', '12': '0.08%', '17': '0.08%', '20': '3.92%', '21': '2.53%'})	(1, {'1': '29.11%', '2': '24.74%', '3': '20.79%', '4': '7.69%', '5': '3.33%', '6': '6.03%', '7': '2.49%', '20': '3.74%', '21': '2.08%'})	(1, {'1': '26.55%', '2': '19.03%', '3': '18.44%', '4': '10.47%', '5': '10.62%', '6': '5.90%', '7': '4.42%', '12': '0.15%', '17': '1.03%', '20': '2.21%', '21': '1.18%'})	(6, {'1': '14.29%', '2': '24.00%', '3': '8.29%', '4': '6.86%', '5': '2.29%', '6': '32.29%', '7': '5.14%', '17': '0.29%', '20': '3.71%', '21': '2.86%'})	453	GOVERNANCE & POLITICAL SYSTEMS
(1, {'1': '28.41%', '2': '8.28%', '3': '9.68%', '4': '10.45%', '5': '7.39%', '6': '1.40%', '7': '8.28%', '8': '1.78%', '9': '5.86%', '11': '4.97%', '16': '1.15%', '22': '0.25%', '23': '1.53%', '24': '2.80%', '25': '2.68%', '26': '0.64%', '27': '0.13%', '28': '1.40%', '30': '1.27%', '31': '0.25%', '32': '0.38%', '33': '0.51%', '35': '0.51%'})		(2, {'1': '11.07%', '2': '54.21%', '3': '11.19%', '4': '5.03%', '5': '3.40%', '6': '0.88%', '7': '8.30%', '8': '0.25%', '9': '1.64%', '11': '0.63%', '16': '0.13%', '23': '1.01%', '24': '0.88%', '25': '0.63%', '27': '0.13%', '28': '0.13%', '30': '0.13%', '35': '0.38%'})	(2, {'1': '11.48%', '2': '26.30%', '3': '10.68%', '4': '5.85%', '5': '8.65%', '6': '1.82%', '7': '14.19%', '8': '0.60%', '9': '6.57%', '11': '2.45%', '16': '3.14%', '23': '2.61%', '24': '1.08%', '25': '2.25%', '26': '0.61%', '27': '0.15%', '30': '0.83%', '31': '0.15%', '35': '0.60%'})	(2, {'1': '19.76%', '2': '29.18%', '3': '6.23%', '4': '11.14%', '5': '12.47%', '7': '5.04%', '8': '0.66%', '9': '2.12%', '11': '1.59%', '16': '0.27%', '23': '2.25%', '24': '1.06%', '25': '0.80%', '26': '1.99%', '27': '0.13%', '28': '0.66%', '30': '0.66%', '32': '0.93%', '33': '0.66%', '35': '2.39%'})	(2, {'1': '8.23%', '2': '36.55%', '3': '15.06%', '4': '9.64%', '5': '6.02%', '6': '4.62%', '7': '2.81%', '8': '0.60%', '9': '1.00%', '11': '1.41%', '16': '0.80%', '22': '0.40%', '23': '0.60%', '24': '1.41%', '25': '0.80%', '26': '1.41%', '27': '0.20%', '28': '0.40%', '29': '3.21%', '30': '0.20%', '31': '0.40%', '32': '0.20%', '34': '1.41%', '35': '2.61%'})	(2, {'1': '10.00%', '2': '13.01%', '3': '11.10%', '4': '8.90%', '5': '7.12%', '6': '0.68%', '7': '6.71%', '8': '4.25%', '9': '4.38%', '11': '4.25%', '16': '1.51%', '22': '1.64%', '23': '4.25%', '24': '4.52%', '25': '1.92%', '26': '0.41%', '27': '1.92%', '28': '1.78%', '29': '2.05%', '30': '3.97%', '31': '1.51%', '32': '0.96%', '33': '0.82%', '34': '0.55%', '35': '1.78%'})		(2, {'1': '18.34%', '2': '35.81%', '3': '1.73%', '4': '2.77%', '5': '15.57%', '6': '0.87%', '7': '5.54%', '8': '1.38%', '9': '4.50%', '11': '1.21%', '23': '3.63%', '24': '0.69%', '25': '0.35%', '26': '0.87%', '27': '0.87%', '28': '0.17%', '31': '0.17%', '32': '0.17%', '33': '0.87%', '35': '4.50%'})	(2, {'1': '1.27%', '2': '13.31%', '3': '10.93%', '4': '8.44%', '5': '7.08%', '6': '0.75%', '7': '8.78%', '8': '1.50%', '9': '7.03%', '11': '2.94%', '16': '3.22%', '22': '0.41%', '23': '6.56%', '24': '1.10%', '25': '5.60%', '27': '0.18%', '28': '5.34%', '29': '0.36%', '30': '8.49%', '31': '0.24%', '32': '1.11%', '35': '4.71%', '36': '0.65%'})	(1, {'1': '23.22%', '2': '11.37%', '3': '17.54%', '4': '4.27%', '5': '8.53%', '6': '2.37%', '7': '2.37%', '8': '0.47%', '9': '7.58%', '11': '3.32%', '15': '0.47%', '16': '0.95%', '22': '1.42%', '23': '6.16%', '24': '0.95%', '25': '2.37%', '26': '0.47%', '27': '0.95%', '28': '0.47%', '29': '0.47%', '30': '0.47%', '32': '0.95%', '34': '0.47%', '35': '2.37%'})	(1, {'1': '24.89%', '2': '24.16%', '3': '6.15%', '4': '12.88%', '5': '10.40%', '6': '0.88%', '7': '5.12%', '8': '4.25%', '9': '2.78%', '11': '0.15%', '22': '0.29%', '23': '0.73%', '24': '2.93%', '25': '0.15%', '26': '0.73%', '27': '0.29%', '28': '0.29%', '30': '0.73%', '31': '0.29%', '32': '0.15%', '33': '0.15%', '35': '1.61%'})	(2, {'1': '16.03%', '2': '31.52%', '3': '7.02%', '4': '6.62%', '5': '10.73%', '6': '3.58%', '7': '9.27%', '8': '2.38%', '9': '2.91%', '11': '1.06%', '15': '0.26%', '16': '0.66%', '22': '0.13%', '23': '1.59%', '24': '2.12%', '25': '0.66%', '26': '0.93%', '30': '0.79%', '31': '0.53%', '33': '0.26%', '35': '0.93%'})	(1, {'1': '50.59%', '2': '27.56%', '3': '5.88%', '4': '5.38%', '5': '4.54%', '6': '0.67%', '7': '0.67%', '8': '0.50%', '9': '0.50%', '11': '0.34%', '16': '0.17%', '22': '0.17%', '23': '0.17%', '24': '1.01%', '25': '0.34%', '26': '0.17%', '27': '0.17%', '30': '0.67%', '33': '0.34%', '34': '0.17%'})	(1, {'1': '36.22%', '2': '21.99%', '3': '7.89%', '4': '5.43%', '5': '4.40%', '6': '3.10%', '7': '4.01%', '8': '2.46%', '9': '1.03%', '11': '1.55%', '16': '0.91%', '22': '0.26%', '23': '1.16%', '24': '2.72%', '25': '0.13%', '26': '2.33%', '28': '0.13%', '29': '0.39%', '30': '1.03%', '31': '0.52%', '32': '0.39%', '33': '0.39%', '34': '0.65%', '35': '0.91%'})	(2, {'1': '26.09%', '2': '31.25%', '3': '7.61%', '4': '3.80%', '5': '13.32%', '6': '0.54%', '7': '4.35%', '9': '4.89%', '11': '0.82%', '16': '0.27%', '22': '0.27%', '23': '2.72%', '24': '1.36%', '27': '0.54%', '28': '0.54%', '30': '0.54%', '34': '0.27%', '35': '0.82%'})	454	GOVERNANCE & POLITICAL SYSTEMS
(4, {'1': '7.35%', '2': '8.76%', '3': '9.28%', '4': '13.14%', '5': '10.18%', '6': '1.42%', '7': '6.06%', '8': '3.35%', '9': '8.38%', '11': '6.96%', '16': '1.80%', '22': '1.55%', '23': '3.87%', '24': '4.90%', '25': '3.22%', '26': '1.29%', '27': '0.52%', '28': '2.71%', '30': '1.93%', '31': '0.90%', '32': '0.64%', '33': '0.39%', '34': '0.64%', '35': '0.77%'})		(3, {'2': '5.88%', '3': '24.90%', '4': '12.72%', '5': '7.11%', '6': '2.19%', '7': '20.52%', '8': '1.64%', '9': '6.02%', '11': '2.33%', '16': '1.37%', '22': '0.14%', '23': '3.97%', '24': '5.34%', '25': '2.05%', '26': '0.41%', '27': '0.41%', '28': '0.27%', '30': '1.09%', '32': '0.27%', '33': '0.41%', '34': '0.27%', '35': '0.68%'})	(7, {'1': '4.93%', '2': '14.49%', '3': '10.11%', '4': '11.50%', '5': '9.05%', '6': '1.99%', '7': '16.31%', '8': '0.66%', '9': '12.36%', '11': '5.54%', '16': '2.19%', '22': '0.17%', '23': '2.81%', '24': '2.37%', '25': '1.37%', '26': '1.56%', '27': '0.48%', '30': '1.52%', '31': '0.49%', '32': '0.11%'})	(4, {'1': '6.89%', '2': '15.29%', '3': '8.54%', '4': '17.22%', '5': '11.57%', '6': '1.38%', '7': '13.22%', '8': '2.75%', '9': '4.55%', '11': '2.20%', '15': '0.96%', '16': '1.10%', '22': '0.28%', '23': '1.79%', '24': '3.86%', '25': '1.24%', '26': '0.55%', '27': '0.41%', '28': '0.96%', '29': '0.14%', '30': '1.38%', '31': '0.14%', '32': '0.96%', '33': '0.55%', '35': '1.93%', '36': '0.14%'})	(4, {'1': '4.61%', '2': '12.38%', '3': '13.83%', '4': '15.29%', '5': '9.95%', '6': '4.85%', '7': '12.62%', '8': '1.94%', '9': '1.46%', '11': '2.18%', '16': '1.21%', '22': '0.49%', '23': '0.97%', '24': '6.07%', '25': '0.24%', '26': '1.21%', '27': '0.49%', '28': '0.24%', '29': '5.10%', '31': '0.24%', '32': '0.49%', '34': '0.73%', '35': '3.40%'})	(3, {'1': '6.54%', '2': '8.01%', '3': '10.46%', '4': '8.82%', '5': '7.52%', '6': '0.82%', '7': '7.19%', '8': '6.54%', '9': '6.70%', '11': '3.27%', '16': '1.96%', '22': '0.82%', '23': '5.56%', '24': '5.72%', '25': '3.92%', '26': '0.98%', '27': '1.96%', '28': '1.80%', '29': '1.14%', '30': '3.10%', '31': '1.47%', '32': '1.63%', '33': '1.14%', '34': '1.14%', '35': '1.80%'})		(5, {'1': '6.96%', '2': '20.88%', '3': '3.87%', '4': '2.84%', '5': '24.74%', '6': '0.77%', '7': '13.66%', '8': '1.80%', '9': '7.73%', '11': '1.29%', '22': '0.52%', '23': '5.15%', '24': '0.52%', '25': '1.55%', '26': '0.77%', '27': '0.26%', '28': '0.26%', '29': '0.26%', '30': '1.29%', '31': '0.26%', '32': '0.77%', '33': '0.52%', '34': '0.52%', '35': '2.84%'})	(2, {'1': '0.46%', '2': '18.34%', '3': '10.82%', '4': '5.67%', '5': '11.61%', '6': '2.30%', '7': '6.47%', '8': '3.99%', '9': '8.70%', '11': '4.22%', '16': '2.20%', '22': '0.20%', '23': '6.68%', '24': '3.72%', '25': '4.26%', '27': '0.20%', '28': '2.73%', '29': '1.31%', '30': '3.13%', '31': '0.27%', '34': '0.19%', '35': '2.50%'})	(23, {'1': '15.15%', '2': '13.13%', '3': '6.06%', '4': '3.03%', '5': '16.16%', '6': '1.01%', '7': '2.02%', '9': '6.06%', '11': '1.01%', '23': '18.18%', '24': '2.02%', '25': '2.02%', '27': '1.01%', '30': '2.02%', '31': '8.08%', '32': '2.02%', '33': '1.01%'})	(2, {'1': '6.66%', '2': '18.58%', '3': '10.37%', '4': '12.85%', '5': '10.53%', '6': '1.70%', '7': '7.28%', '8': '9.13%', '9': '3.41%', '11': '1.70%', '16': '0.46%', '22': '0.15%', '23': '2.94%', '24': '6.35%', '25': '0.77%', '26': '0.62%', '27': '0.62%', '30': '0.93%', '32': '0.62%', '34': '0.62%', '35': '3.72%'})	(2, {'1': '7.36%', '2': '20.30%', '3': '6.81%', '4': '11.72%', '5': '11.58%', '6': '2.18%', '7': '14.44%', '8': '3.41%', '9': '4.90%', '11': '1.50%', '15': '0.54%', '16': '0.41%', '22': '0.27%', '23': '3.13%', '24': '4.50%', '25': '0.82%', '26': '1.23%', '27': '0.27%', '28': '0.27%', '30': '2.86%', '31': '0.27%', '32': '0.27%', '34': '0.14%', '35': '0.82%'})	(2, {'1': '11.80%', '2': '27.49%', '3': '10.46%', '4': '16.02%', '5': '15.68%', '6': '2.02%', '7': '2.53%', '8': '1.18%', '9': '2.36%', '11': '0.34%', '16': '0.84%', '22': '1.35%', '23': '1.69%', '24': '1.85%', '25': '0.51%', '27': '0.34%', '28': '0.51%', '30': '0.67%', '31': '0.34%', '32': '1.18%', '33': '0.17%', '34': '0.17%', '35': '0.51%'})	(2, {'1': '6.56%', '2': '19.54%', '3': '10.58%', '4': '13.79%', '5': '8.84%', '6': '4.95%', '7': '11.78%', '8': '6.69%', '9': '2.54%', '11': '3.48%', '16': '0.67%', '22': '0.27%', '23': '1.20%', '24': '5.35%', '25': '0.27%', '26': '0.54%', '27': '0.13%', '28': '0.13%', '29': '0.13%', '30': '1.47%', '31': '0.13%', '32': '0.13%', '33': '0.13%', '34': '0.13%', '35': '0.54%'})	(5, {'1': '5.41%', '2': '18.02%', '3': '15.02%', '4': '5.41%', '5': '18.62%', '6': '1.50%', '7': '6.31%', '9': '6.91%', '11': '1.20%', '16': '0.90%', '22': '0.90%', '23': '8.71%', '24': '4.50%', '25': '0.30%', '28': '1.80%', '30': '1.80%', '34': '0.60%', '35': '2.10%'})	455	GOVERNANCE & POLITICAL SYSTEMS
(9, {'1': '6.12%', '2': '5.59%', '3': '7.71%', '4': '9.57%', '5': '9.18%', '6': '1.46%', '7': '7.85%', '8': '3.99%', '9': '10.77%', '11': '6.52%', '16': '2.26%', '22': '1.86%', '23': '5.59%', '24': '4.52%', '25': '5.19%', '26': '1.20%', '27': '0.53%', '28': '1.86%', '30': '3.06%', '31': '0.93%', '32': '0.53%', '33': '1.46%', '34': '0.80%', '35': '1.46%'})		(7, {'1': '0.44%', '2': '0.15%', '3': '4.41%', '4': '8.08%', '5': '4.70%', '6': '2.50%', '7': '16.89%', '8': '1.76%', '9': '8.96%', '11': '6.75%', '16': '1.91%', '22': '0.73%', '23': '12.33%', '24': '6.46%', '25': '4.26%', '26': '1.32%', '27': '1.76%', '28': '1.03%', '30': '3.52%', '31': '0.44%', '32': '0.73%', '33': '0.59%', '34': '0.29%', '35': '9.99%'})	(7, {'1': '2.61%', '2': '9.83%', '3': '9.37%', '4': '8.07%', '5': '8.21%', '6': '3.14%', '7': '14.79%', '8': '2.14%', '9': '11.92%', '11': '6.05%', '16': '1.51%', '22': '0.10%', '23': '6.47%', '24': '4.22%', '25': '2.38%', '26': '2.09%', '27': '0.20%', '28': '0.47%', '30': '5.09%', '32': '0.08%', '33': '0.57%', '35': '0.69%'})	(7, {'1': '7.79%', '2': '11.03%', '3': '6.32%', '4': '12.35%', '5': '10.00%', '6': '1.03%', '7': '14.56%', '8': '3.24%', '9': '5.88%', '11': '2.06%', '15': '1.76%', '16': '0.44%', '23': '3.09%', '24': '6.62%', '25': '0.88%', '26': '1.03%', '27': '0.74%', '28': '0.74%', '29': '0.29%', '30': '3.82%', '31': '0.88%', '32': '1.47%', '33': '0.74%', '34': '0.29%', '35': '2.50%', '36': '0.44%'})	(4, {'1': '3.80%', '2': '5.06%', '3': '9.18%', '4': '11.39%', '5': '10.44%', '6': '6.01%', '7': '11.39%', '8': '5.06%', '9': '6.01%', '11': '3.80%', '16': '2.53%', '22': '1.27%', '24': '6.01%', '25': '0.95%', '26': '3.16%', '28': '0.32%', '29': '4.43%', '31': '0.63%', '32': '1.58%', '34': '2.22%', '35': '4.75%'})	(8, {'1': '7.47%', '2': '6.43%', '3': '6.43%', '4': '4.77%', '5': '8.51%', '6': '2.28%', '7': '7.68%', '8': '9.13%', '9': '5.60%', '11': '3.53%', '16': '1.45%', '22': '2.49%', '23': '8.51%', '24': '6.22%', '25': '3.11%', '26': '1.04%', '27': '2.07%', '28': '1.04%', '29': '1.66%', '30': '2.90%', '31': '1.87%', '32': '2.90%', '33': '0.41%', '34': '1.66%', '35': '0.83%'})		(5, {'1': '1.69%', '2': '18.54%', '3': '1.69%', '4': '3.93%', '5': '19.66%', '6': '1.12%', '7': '10.67%', '8': '1.69%', '9': '12.36%', '11': '1.12%', '22': '2.25%', '23': '7.87%', '24': '2.25%', '25': '1.69%', '27': '1.69%', '28': '0.56%', '29': '1.12%', '30': '0.56%', '31': '0.56%', '32': '1.12%', '33': '1.69%', '35': '6.18%'})	(5, {'2': '6.86%', '3': '8.85%', '4': '8.88%', '5': '16.02%', '7': '8.34%', '8': '6.86%', '9': '10.25%', '11': '5.45%', '16': '3.18%', '22': '0.45%', '23': '5.16%', '24': '2.00%', '25': '7.31%', '28': '4.29%', '29': '0.48%', '30': '4.30%', '35': '1.11%', '36': '0.22%'})	(23, {'1': '7.14%', '2': '10.71%', '3': '7.14%', '5': '3.57%', '6': '7.14%', '9': '7.14%', '16': '3.57%', '23': '32.14%', '24': '3.57%', '25': '10.71%', '30': '3.57%', '35': '3.57%'})	(4, {'1': '5.03%', '2': '7.72%', '3': '6.21%', '4': '12.25%', '5': '11.91%', '6': '2.35%', '7': '9.40%', '8': '9.06%', '9': '6.38%', '11': '3.86%', '16': '0.17%', '22': '0.84%', '23': '6.54%', '24': '7.55%', '25': '0.50%', '26': '0.67%', '27': '0.34%', '28': '0.50%', '30': '1.85%', '31': '1.17%', '32': '1.68%', '33': '0.67%', '35': '3.36%'})	(7, {'1': '5.43%', '2': '10.85%', '3': '6.89%', '4': '6.30%', '5': '10.41%', '6': '3.08%', '7': '15.84%', '8': '4.69%', '9': '8.80%', '11': '4.11%', '15': '1.61%', '16': '0.44%', '22': '0.59%', '23': '3.67%', '24': '7.18%', '25': '0.73%', '26': '1.61%', '27': '0.29%', '28': '0.29%', '30': '3.37%', '31': '0.15%', '32': '0.73%', '33': '0.44%', '34': '0.15%', '35': '2.35%'})	(4, {'1': '9.31%', '2': '9.31%', '3': '12.59%', '4': '15.86%', '5': '13.45%', '6': '3.28%', '7': '5.34%', '8': '3.28%', '9': '1.72%', '11': '2.93%', '16': '0.34%', '22': '1.38%', '23': '2.59%', '24': '8.28%', '25': '1.38%', '26': '0.86%', '27': '1.38%', '28': '0.34%', '30': '2.07%', '31': '0.34%', '32': '1.03%', '33': '0.86%', '34': '0.86%', '35': '1.21%'})	(7, {'1': '7.13%', '2': '8.39%', '3': '7.97%', '4': '9.23%', '5': '9.37%', '6': '3.92%', '7': '15.38%', '8': '8.53%', '9': '4.20%', '11': '4.06%', '16': '1.26%', '22': '0.56%', '23': '2.80%', '24': '9.65%', '25': '1.12%', '26': '0.28%', '27': '0.28%', '29': '0.28%', '30': '2.38%', '31': '0.28%', '32': '0.70%', '33': '0.56%', '34': '0.70%', '35': '0.98%'})	(5, {'1': '3.29%', '2': '10.86%', '3': '8.22%', '4': '6.91%', '5': '19.41%', '6': '3.95%', '7': '9.21%', '9': '9.87%', '11': '1.32%', '16': '1.64%', '23': '8.22%', '24': '3.62%', '25': '1.64%', '28': '1.64%', '30': '3.95%', '32': '0.33%', '34': '0.99%', '35': '4.93%'})	456	GOVERNANCE & POLITICAL SYSTEMS
(1.56, {'1': '43.88%', '2': '56.12%'})		(2.41, {'1': '10.63%', '2': '37.89%', '3': '51.49%'})	(1.9, {'1': '10.49%', '2': '89.51%'})	(1.39, {'1': '61.45%', '2': '38.55%'})	(2.51, {'1': '5.90%', '2': '37.01%', '3': '57.09%'})	(1.48, {'1': '51.70%', '2': '48.30%'})		(1.72, {'1': '27.96%', '2': '72.04%'})	(1.95, {'1': '5.48%', '2': '94.52%'})	(N/A, {})	(1.72, {'1': '27.65%', '2': '72.35%'})	(1.44, {'1': '55.52%', '2': '44.48%'})	(1.77, {'1': '22.67%', '2': '77.33%'})	(1.76, {'1': '49.65%', '2': '24.35%', '3': '25.99%'})	(N/A, {})	457	GOVERNANCE & POLITICAL SYSTEMS
(2.1, {'1': '37.03%', '2': '32.75%', '3': '16.12%', '4': '11.34%', '5': '2.77%'})		(2.43, {'1': '33.04%', '2': '20.40%', '3': '21.15%', '4': '21.65%', '5': '3.75%'})	(2.39, {'1': '31.12%', '2': '24.02%', '3': '24.32%', '4': '15.38%', '5': '5.16%'})	(2.3, {'1': '34.82%', '2': '23.85%', '3': '21.43%', '4': '16.33%', '5': '3.57%'})	(2.29, {'1': '33.58%', '2': '28.49%', '3': '14.88%', '4': '21.78%', '5': '1.27%'})	(2.29, {'1': '37.87%', '2': '24.53%', '3': '15.87%', '4': '14.00%', '5': '7.73%'})		(2.11, {'1': '45.90%', '2': '16.79%', '3': '20.13%', '4': '15.13%', '5': '2.05%'})	(1.54, {'1': '45.76%', '2': '54.08%', '3': '0.16%'})	(2.73, {'1': '19.75%', '2': '42.27%', '3': '6.35%', '4': '8.15%', '5': '23.48%'})	(1.86, {'1': '46.76%', '2': '33.24%', '3': '10.07%', '4': '7.17%', '5': '2.76%'})	(1.96, {'1': '45.37%', '2': '33.21%', '3': '4.82%', '4': '12.93%', '5': '3.68%'})	(1.69, {'1': '49.16%', '2': '40.47%', '3': '3.51%', '4': '5.85%', '5': '1.00%'})	(1.86, {'1': '38.52%', '2': '48.93%', '3': '3.26%', '4': '7.03%', '5': '2.26%'})	(2.16, {'1': '37.40%', '2': '37.67%', '3': '6.50%', '4': '8.67%', '5': '9.76%'})	458	GOVERNANCE & POLITICAL SYSTEMS
(1.39, {'1': '69.77%', '2': '27.46%', '5': '2.77%'})		(1.58, {'1': '53.44%', '2': '42.80%', '5': '3.75%'})	(1.6, {'1': '55.14%', '2': '39.70%', '5': '5.16%'})	(1.52, {'1': '58.67%', '2': '37.76%', '5': '3.57%'})	(1.42, {'1': '62.07%', '2': '36.66%', '5': '1.27%'})	(1.61, {'1': '62.40%', '2': '29.87%', '5': '7.73%'})		(1.43, {'1': '62.69%', '2': '35.26%', '5': '2.05%'})	(1.0, {'1': '99.84%', '2': '0.16%'})	(2.08, {'1': '62.02%', '2': '14.50%', '5': '23.48%'})	(1.28, {'1': '80.00%', '2': '17.24%', '5': '2.76%'})	(1.32, {'1': '78.58%', '2': '17.74%', '5': '3.68%'})	(1.13, {'1': '89.63%', '2': '9.36%', '5': '1.00%'})	(1.19, {'1': '87.45%', '2': '10.29%', '5': '2.26%'})	(1.54, {'1': '75.07%', '2': '15.18%', '5': '9.76%'})	459	GOVERNANCE & POLITICAL SYSTEMS
(2.51, {'1': '13.57%', '2': '39.04%', '3': '30.61%', '4': '16.78%'})		(1.97, {'1': '40.63%', '2': '31.16%', '3': '18.93%', '4': '9.28%'})	(1.93, {'1': '40.69%', '2': '34.16%', '3': '16.94%', '4': '8.20%'})	(2.41, {'1': '27.65%', '2': '22.78%', '3': '30.48%', '4': '19.09%'})	(2.35, {'1': '27.80%', '2': '29.60%', '3': '22.20%', '4': '20.40%'})	(2.9, {'1': '10.26%', '2': '20.66%', '3': '38.36%', '4': '30.72%'})		(2.21, {'1': '41.57%', '2': '19.12%', '3': '15.72%', '4': '23.58%'})	(1.93, {'1': '37.36%', '2': '37.42%', '3': '20.17%', '4': '5.05%'})	(2.46, {'1': '9.32%', '2': '48.02%', '3': '29.58%', '4': '13.08%'})	(2.43, {'1': '18.90%', '2': '33.53%', '3': '33.53%', '4': '14.04%'})	(2.38, {'1': '14.24%', '2': '42.98%', '3': '33.29%', '4': '9.49%'})	(2.52, {'1': '11.86%', '2': '36.01%', '3': '40.10%', '4': '12.03%'})	(2.32, {'1': '17.14%', '2': '42.41%', '3': '31.43%', '4': '9.02%'})	(2.46, {'1': '8.54%', '2': '41.74%', '3': '44.77%', '4': '4.96%'})	460	GOVERNANCE & POLITICAL SYSTEMS
(1.81, {'1': '18.97%', '2': '81.03%'})		(1.93, {'1': '6.85%', '2': '93.15%'})	(1.99, {'1': '0.62%', '2': '99.38%'})	(1.83, {'1': '16.93%', '2': '83.07%'})	(1.98, {'1': '1.95%', '2': '98.05%'})	(1.92, {'1': '7.59%', '2': '92.41%'})		(1.97, {'1': '2.88%', '2': '97.12%'})	(1.99, {'1': '0.69%', '2': '99.31%'})	(1.99, {'1': '1.09%', '2': '98.91%'})	(1.89, {'1': '11.07%', '2': '88.93%'})	(1.81, {'1': '19.22%', '2': '80.78%'})	(1.81, {'1': '19.18%', '2': '80.82%'})	(1.69, {'1': '31.25%', '2': '68.75%'})	(1.98, {'1': '1.68%', '2': '98.32%'})	461	GOVERNANCE & POLITICAL SYSTEMS
(3.08, {'1': '21.76%', '3': '26.81%', '4': '51.43%'})		(3.64, {'1': '6.92%', '3': '15.69%', '4': '77.39%'})	(3.95, {'1': '0.77%', '3': '2.95%', '4': '96.28%'})	(3.2, {'1': '17.46%', '3': '27.99%', '4': '54.55%'})	(3.87, {'1': '2.83%', '3': '4.49%', '4': '92.68%'})	(3.39, {'1': '8.82%', '3': '34.56%', '4': '56.62%'})		(3.8, {'1': '3.11%', '3': '10.49%', '4': '86.41%'})	(3.9, {'1': '0.70%', '3': '7.83%', '4': '91.47%'})	(3.96, {'1': '1.09%', '3': '0.59%', '4': '98.32%'})	(3.45, {'1': '13.27%', '3': '15.18%', '4': '71.55%'})	(3.18, {'1': '20.32%', '3': '20.54%', '4': '59.14%'})	(3.09, {'1': '22.80%', '3': '22.93%', '4': '54.27%'})	(2.78, {'1': '31.36%', '3': '28.12%', '4': '40.52%'})	(3.93, {'1': '1.83%', '3': '1.28%', '4': '96.89%'})	462	GOVERNANCE & POLITICAL SYSTEMS
(1.76, {'1': '24.12%', '2': '75.88%'})		(1.94, {'1': '6.46%', '2': '93.54%'})	(1.97, {'1': '3.45%', '2': '96.55%'})	(1.94, {'1': '5.93%', '2': '94.07%'})	(1.91, {'1': '9.23%', '2': '90.77%'})	(1.9, {'1': '9.91%', '2': '90.09%'})		(1.94, {'1': '5.55%', '2': '94.45%'})	(1.98, {'1': '1.57%', '2': '98.43%'})	(1.93, {'1': '6.69%', '2': '93.31%'})	(1.85, {'1': '15.36%', '2': '84.64%'})	(1.94, {'1': '6.18%', '2': '93.82%'})	(1.65, {'1': '34.69%', '2': '65.31%'})	(1.88, {'1': '12.34%', '2': '87.66%'})	(1.92, {'1': '8.41%', '2': '91.59%'})	463	GOVERNANCE & POLITICAL SYSTEMS
(1.79, {'1': '20.53%', '2': '79.47%'})		(1.95, {'1': '5.04%', '2': '94.96%'})	(1.96, {'1': '3.71%', '2': '96.29%'})	(1.96, {'1': '4.30%', '2': '95.70%'})	(1.93, {'1': '6.92%', '2': '93.08%'})	(1.89, {'1': '10.66%', '2': '89.34%'})		(1.94, {'1': '5.76%', '2': '94.24%'})	(1.98, {'1': '1.61%', '2': '98.39%'})	(N/A, {})	(1.87, {'1': '12.55%', '2': '87.45%'})	(1.92, {'1': '7.56%', '2': '92.44%'})	(1.7, {'1': '30.15%', '2': '69.85%'})	(1.89, {'1': '10.80%', '2': '89.20%'})	(N/A, {})	464	GOVERNANCE & POLITICAL SYSTEMS
(1.82, {'1': '17.59%', '2': '82.41%'})		(1.9, {'1': '9.81%', '2': '90.19%'})	(1.91, {'1': '9.16%', '2': '90.84%'})	(1.93, {'1': '7.14%', '2': '92.86%'})	(1.87, {'1': '12.62%', '2': '87.38%'})	(1.91, {'1': '8.90%', '2': '91.10%'})		(N/A, {})	(N/A, {})	(1.92, {'1': '8.46%', '2': '91.54%'})	(1.8, {'1': '19.77%', '2': '80.23%'})	(1.91, {'1': '9.10%', '2': '90.90%'})	(1.6, {'1': '40.21%', '2': '59.79%'})	(1.84, {'1': '16.43%', '2': '83.57%'})	(N/A, {})	465	GOVERNANCE & POLITICAL SYSTEMS
(1.87, {'1': '13.36%', '2': '86.64%'})		(1.9, {'1': '9.67%', '2': '90.33%'})	(1.98, {'1': '2.05%', '2': '97.95%'})	(1.95, {'1': '4.67%', '2': '95.33%'})	(1.95, {'1': '5.12%', '2': '94.88%'})	(1.91, {'1': '8.79%', '2': '91.21%'})		(1.97, {'1': '2.63%', '2': '97.37%'})	(2.0, {'1': '0.34%', '2': '99.66%'})	(1.96, {'1': '3.73%', '2': '96.27%'})	(1.85, {'1': '15.36%', '2': '84.64%'})	(1.95, {'1': '4.68%', '2': '95.32%'})	(1.71, {'1': '29.00%', '2': '71.00%'})	(1.88, {'1': '12.43%', '2': '87.57%'})	(1.96, {'1': '4.46%', '2': '95.54%'})	466	GOVERNANCE & POLITICAL SYSTEMS
(1.68, {'1': '45.13%', '2': '43.59%', '3': '9.23%', '4': '2.05%'})		(2.02, {'1': '41.51%', '2': '33.96%', '3': '5.66%', '4': '18.87%'})	(2.1, {'1': '38.20%', '2': '34.77%', '3': '5.69%', '4': '21.35%'})	(1.83, {'1': '41.30%', '2': '41.30%', '3': '10.87%', '4': '6.52%'})	(2.13, {'1': '30.43%', '2': '39.13%', '3': '17.39%', '4': '13.04%'})	(2.07, {'1': '30.67%', '2': '37.33%', '3': '26.67%', '4': '5.33%'})		(2.0, {'1': '42.50%', '2': '32.50%', '3': '7.50%', '4': '17.50%'})	(1.25, {'1': '74.85%', '2': '25.15%'})	(2.27, {'1': '32.99%', '2': '35.05%', '3': '4.12%', '4': '27.84%'})	(2.07, {'1': '38.97%', '2': '32.35%', '3': '11.03%', '4': '17.65%'})	(1.95, {'1': '41.03%', '2': '35.90%', '3': '10.26%', '4': '12.82%'})	(1.99, {'1': '21.30%', '2': '60.19%', '3': '17.13%', '4': '1.39%'})	(2.25, {'1': '30.10%', '2': '33.98%', '3': '16.50%', '4': '19.42%'})	(1.9, {'1': '26.67%', '2': '56.67%', '3': '16.67%'})	467	GOVERNANCE & POLITICAL SYSTEMS
(2.31, {'1': '13.84%', '2': '50.31%', '3': '27.04%', '4': '8.81%'})		(2.72, {'1': '25.64%', '2': '17.95%', '3': '15.38%', '4': '41.03%'})	(2.78, {'1': '24.02%', '2': '15.02%', '3': '19.97%', '4': '41.00%'})	(2.35, {'1': '26.09%', '2': '34.78%', '3': '17.39%', '4': '21.74%'})	(2.65, {'1': '20.59%', '2': '32.35%', '3': '8.82%', '4': '38.24%'})	(2.59, {'1': '10.13%', '2': '39.24%', '3': '31.65%', '4': '18.99%'})		(3.1, {'1': '18.75%', '2': '10.42%', '3': '12.50%', '4': '58.33%'})	(1.3, {'1': '70.35%', '2': '29.65%'})	(N/A, {})	(2.17, {'1': '30.00%', '2': '37.00%', '3': '19.00%', '4': '14.00%'})	(2.31, {'1': '25.45%', '2': '38.18%', '3': '16.36%', '4': '20.00%'})	(2.18, {'1': '16.02%', '2': '53.59%', '3': '26.52%', '4': '3.87%'})	(1.96, {'1': '35.53%', '2': '43.42%', '3': '10.53%', '4': '10.53%'})	(N/A, {})	468	GOVERNANCE & POLITICAL SYSTEMS
(1.75, {'1': '38.69%', '2': '49.64%', '3': '9.49%', '4': '2.19%'})		(2.4, {'1': '33.33%', '2': '23.46%', '3': '13.58%', '4': '29.63%'})	(2.23, {'1': '27.63%', '2': '38.93%', '3': '16.17%', '4': '17.26%'})	(2.3, {'1': '30.19%', '2': '30.19%', '3': '18.87%', '4': '20.75%'})	(2.21, {'1': '33.80%', '2': '32.39%', '3': '12.68%', '4': '21.13%'})	(2.54, {'1': '14.93%', '2': '29.85%', '3': '41.79%', '4': '13.43%'})		(N/A, {})	(N/A, {})	(2.6, {'1': '23.33%', '2': '30.00%', '3': '10.00%', '4': '36.67%'})	(2.06, {'1': '40.99%', '2': '27.95%', '3': '14.91%', '4': '16.15%'})	(2.13, {'1': '27.63%', '2': '40.79%', '3': '22.37%', '4': '9.21%'})	(1.88, {'1': '28.57%', '2': '55.56%', '3': '14.68%', '4': '1.19%'})	(2.22, {'1': '28.46%', '2': '37.69%', '3': '16.92%', '4': '16.92%'})	(N/A, {})	469	GOVERNANCE & POLITICAL SYSTEMS
(1.68, {'1': '45.87%', '2': '43.12%', '3': '8.26%', '4': '2.75%'})		(2.3, {'1': '30.99%', '2': '32.39%', '3': '12.68%', '4': '23.94%'})	(1.97, {'1': '25.96%', '2': '51.15%', '3': '22.89%'})	(2.29, {'1': '33.33%', '2': '25.00%', '3': '20.83%', '4': '20.83%'})	(2.35, {'1': '38.71%', '2': '19.35%', '3': '9.68%', '4': '32.26%'})	(2.45, {'1': '14.55%', '2': '38.18%', '3': '34.55%', '4': '12.73%'})		(2.47, {'1': '21.05%', '2': '42.11%', '3': '5.26%', '4': '31.58%'})	(1.0, {'1': '100.00%'})	(2.5, {'1': '25.93%', '2': '29.63%', '3': '12.96%', '4': '31.48%'})	(2.08, {'1': '40.87%', '2': '25.22%', '3': '19.13%', '4': '14.78%'})	(1.88, {'1': '37.50%', '2': '46.88%', '3': '6.25%', '4': '9.38%'})	(1.91, {'1': '30.56%', '2': '48.89%', '3': '20.00%', '4': '0.56%'})	(2.09, {'1': '24.42%', '2': '52.33%', '3': '12.79%', '4': '10.47%'})	(1.73, {'1': '45.45%', '2': '36.36%', '3': '18.18%'})	470	GOVERNANCE & POLITICAL SYSTEMS
(5.01, {'1': '24.13%', '2': '3.73%', '3': '7.45%', '4': '10.46%', '5': '10.50%', '6': '7.87%', '7': '11.13%', '8': '8.09%', '9': '3.77%', '10': '12.87%'})		(6.61, {'1': '7.94%', '2': '2.97%', '3': '5.64%', '4': '6.22%', '5': '16.67%', '6': '8.10%', '7': '10.03%', '8': '7.60%', '9': '5.51%', '10': '29.32%'})	(5.61, {'1': '17.97%', '2': '6.59%', '3': '4.84%', '4': '4.63%', '5': '17.00%', '6': '6.94%', '7': '10.25%', '8': '6.95%', '9': '5.13%', '10': '19.69%'})	(8.19, {'1': '5.63%', '2': '0.84%', '3': '1.26%', '4': '2.69%', '5': '6.21%', '6': '4.91%', '7': '8.19%', '8': '8.65%', '9': '5.84%', '10': '55.79%'})	(6.23, {'1': '11.49%', '2': '3.17%', '3': '4.81%', '4': '6.86%', '5': '19.05%', '6': '9.20%', '7': '8.44%', '8': '6.04%', '9': '4.16%', '10': '26.79%'})	(6.43, {'1': '5.14%', '2': '2.87%', '3': '6.62%', '4': '6.92%', '5': '11.80%', '6': '13.63%', '7': '18.20%', '8': '12.93%', '9': '5.88%', '10': '16.02%'})		(6.4, {'1': '13.26%', '2': '2.71%', '3': '4.21%', '4': '4.75%', '5': '17.16%', '6': '6.34%', '7': '8.74%', '8': '9.05%', '9': '5.14%', '10': '28.65%'})	(6.16, {'1': '0.98%', '2': '0.99%', '3': '3.46%', '4': '11.91%', '5': '28.24%', '6': '22.54%', '7': '10.38%', '8': '4.26%', '9': '0.21%', '10': '17.04%'})	(3.72, {'1': '51.52%', '2': '5.02%', '3': '4.50%', '4': '3.39%', '5': '7.54%', '6': '3.21%', '7': '3.74%', '8': '3.86%', '9': '2.86%', '10': '14.37%'})	(5.78, {'1': '23.91%', '2': '6.50%', '3': '7.28%', '4': '4.90%', '5': '5.50%', '6': '4.54%', '7': '5.18%', '8': '4.12%', '9': '5.36%', '10': '32.71%'})	(4.64, {'1': '24.18%', '2': '7.09%', '3': '9.12%', '4': '7.51%', '5': '16.08%', '6': '7.76%', '7': '8.74%', '8': '5.22%', '9': '4.16%', '10': '10.14%'})	(5.23, {'1': '9.68%', '2': '14.85%', '3': '8.62%', '4': '7.73%', '5': '9.12%', '6': '12.18%', '7': '15.35%', '8': '9.90%', '9': '3.78%', '10': '8.79%'})	(5.28, {'1': '19.55%', '2': '4.42%', '3': '7.62%', '4': '9.60%', '5': '11.75%', '6': '10.28%', '7': '8.30%', '8': '9.31%', '9': '6.61%', '10': '12.55%'})	(5.64, {'1': '28.89%', '2': '6.27%', '3': '3.00%', '4': '2.12%', '5': '7.16%', '6': '7.24%', '7': '4.95%', '8': '3.80%', '9': '4.59%', '10': '31.98%'})	471	GOVERNANCE & POLITICAL SYSTEMS
(2.58, {'1': '18.40%', '2': '5.60%', '3': '76.01%'})		(2.89, {'1': '3.94%', '2': '2.73%', '3': '93.33%'})	(2.96, {'1': '0.89%', '2': '2.27%', '3': '96.84%'})	(2.87, {'1': '4.05%', '2': '5.36%', '3': '90.59%'})	(2.92, {'1': '3.15%', '2': '1.76%', '3': '95.09%'})	(2.64, {'1': '11.55%', '2': '12.74%', '3': '75.70%'})		(2.95, {'1': '1.92%', '2': '1.38%', '3': '96.70%'})	(2.94, {'1': '2.54%', '2': '1.07%', '3': '96.39%'})	(2.83, {'1': '6.95%', '2': '3.36%', '3': '89.69%'})	(2.7, {'1': '8.89%', '2': '12.36%', '3': '78.76%'})	(2.87, {'1': '4.27%', '2': '4.73%', '3': '91.00%'})	(2.34, {'1': '21.52%', '2': '22.59%', '3': '55.89%'})	(2.66, {'1': '12.70%', '2': '8.59%', '3': '78.70%'})	(2.66, {'1': '11.85%', '2': '9.87%', '3': '78.28%'})	472	GOVERNANCE & POLITICAL SYSTEMS
(2.68, {'1': '13.83%', '2': '4.05%', '3': '82.12%'})		(2.76, {'1': '7.11%', '2': '10.25%', '3': '82.64%'})	(2.96, {'1': '1.04%', '2': '2.30%', '3': '96.66%'})	(2.71, {'1': '8.05%', '2': '13.18%', '3': '78.77%'})	(2.81, {'1': '6.84%', '2': '5.64%', '3': '87.52%'})	(2.52, {'1': '15.86%', '2': '16.38%', '3': '67.76%'})		(2.92, {'1': '2.92%', '2': '2.38%', '3': '94.70%'})	(2.87, {'1': '5.26%', '2': '2.43%', '3': '92.32%'})	(2.86, {'1': '4.73%', '2': '4.73%', '3': '90.54%'})	(2.58, {'1': '11.55%', '2': '19.00%', '3': '69.44%'})	(2.79, {'1': '6.75%', '2': '7.30%', '3': '85.95%'})	(2.32, {'1': '25.24%', '2': '17.46%', '3': '57.30%'})	(2.62, {'1': '12.97%', '2': '12.21%', '3': '74.82%'})	(2.7, {'1': '10.56%', '2': '9.18%', '3': '80.26%'})	473	GOVERNANCE & POLITICAL SYSTEMS
(2.6, {'1': '16.87%', '2': '6.31%', '3': '76.82%'})		(2.89, {'1': '3.53%', '2': '3.83%', '3': '92.64%'})	(2.96, {'1': '0.75%', '2': '2.41%', '3': '96.85%'})	(2.82, {'1': '5.13%', '2': '7.32%', '3': '87.54%'})	(2.89, {'1': '3.93%', '2': '3.09%', '3': '92.98%'})	(2.57, {'1': '14.68%', '2': '13.39%', '3': '71.93%'})		(2.95, {'1': '1.42%', '2': '1.96%', '3': '96.62%'})	(2.96, {'1': '1.41%', '2': '1.07%', '3': '97.52%'})	(2.71, {'1': '12.92%', '2': '3.25%', '3': '83.83%'})	(2.67, {'1': '9.55%', '2': '14.25%', '3': '76.20%'})	(2.85, {'1': '4.69%', '2': '5.58%', '3': '89.73%'})	(2.28, {'1': '27.17%', '2': '18.17%', '3': '54.67%'})	(2.67, {'1': '11.07%', '2': '10.74%', '3': '78.19%'})	(2.69, {'1': '10.68%', '2': '9.30%', '3': '80.02%'})	474	GOVERNANCE & POLITICAL SYSTEMS
(2.56, {'1': '16.80%', '2': '10.37%', '3': '72.83%'})		(2.85, {'1': '5.24%', '2': '4.82%', '3': '89.93%'})	(2.95, {'1': '1.49%', '2': '2.06%', '3': '96.45%'})	(2.81, {'1': '5.75%', '2': '7.52%', '3': '86.73%'})	(2.85, {'1': '5.67%', '2': '3.44%', '3': '90.89%'})	(2.47, {'1': '15.55%', '2': '21.69%', '3': '62.77%'})		(2.91, {'1': '3.10%', '2': '2.89%', '3': '94.01%'})	(2.87, {'1': '4.73%', '2': '3.79%', '3': '91.48%'})	(2.7, {'1': '12.55%', '2': '4.83%', '3': '82.62%'})	(2.67, {'1': '9.52%', '2': '14.39%', '3': '76.09%'})	(2.81, {'1': '5.89%', '2': '7.37%', '3': '86.74%'})	(2.19, {'1': '30.77%', '2': '19.63%', '3': '49.60%'})	(2.66, {'1': '10.19%', '2': '13.26%', '3': '76.56%'})	(2.67, {'1': '10.44%', '2': '11.91%', '3': '77.65%'})	475	GOVERNANCE & POLITICAL SYSTEMS
(1, {'1': '36.61%', '2': '3.39%', '3': '8.70%', '4': '3.99%', '5': '3.19%', '6': '3.32%', '7': '4.32%', '8': '17.01%', '9': '14.09%', '10': '2.06%', '11': '1.46%', '12': '1.86%'})		(1, {'1': '53.68%', '2': '11.63%', '3': '4.06%', '4': '2.34%', '5': '8.81%', '6': '2.62%', '7': '3.85%', '8': '3.37%', '9': '3.85%', '10': '5.78%'})	(1, {'1': '45.04%', '2': '4.38%', '3': '2.75%', '4': '0.87%', '5': '1.40%', '6': '0.51%', '7': '6.28%', '8': '7.49%', '9': '4.84%', '10': '4.94%', '11': '18.47%', '12': '3.02%'})	(1, {'1': '43.88%', '2': '7.37%', '3': '3.58%', '4': '3.25%', '5': '7.10%', '6': '3.85%', '7': '8.59%', '8': '3.79%', '9': '6.56%', '10': '10.21%', '11': '1.42%', '12': '0.41%'})	(1, {'1': '43.42%', '2': '9.12%', '3': '5.18%', '4': '2.49%', '5': '6.84%', '6': '4.66%', '7': '10.16%', '8': '2.18%', '9': '6.42%', '10': '7.36%', '11': '1.55%', '12': '0.62%'})	(7, {'1': '15.13%', '2': '6.93%', '3': '10.96%', '4': '8.20%', '5': '8.84%', '6': '10.25%', '7': '15.42%', '8': '6.58%', '9': '10.25%', '10': '7.21%', '11': '0.21%'})		(1, {'1': '30.51%', '2': '3.95%', '3': '6.66%', '4': '2.80%', '5': '4.52%', '6': '1.48%', '7': '12.34%', '8': '2.30%', '9': '9.13%', '10': '17.11%', '11': '9.21%'})	(7, {'1': '12.49%', '2': '0.43%', '3': '7.12%', '4': '2.48%', '5': '9.38%', '6': '13.56%', '7': '33.54%', '8': '6.17%', '9': '6.03%', '10': '8.80%'})	(1, {'1': '28.30%', '2': '16.35%', '3': '3.14%', '4': '4.40%', '5': '1.26%', '6': '3.14%', '7': '5.03%', '8': '5.66%', '9': '15.72%', '10': '11.32%', '11': '5.66%'})	(1, {'1': '46.73%', '2': '7.76%', '3': '5.92%', '4': '3.54%', '5': '5.69%', '6': '3.69%', '7': '10.53%', '8': '1.92%', '9': '6.23%', '10': '5.46%', '11': '1.31%', '12': '1.23%'})	(1, {'1': '49.00%', '2': '5.19%', '3': '3.98%', '4': '2.42%', '5': '4.55%', '6': '3.63%', '7': '7.11%', '8': '1.28%', '9': '9.67%', '10': '7.11%', '11': '3.06%', '12': '2.99%'})	(1, {'1': '63.22%', '2': '14.31%', '3': '3.20%', '4': '2.36%', '5': '1.09%', '6': '0.25%', '7': '3.37%', '8': '6.90%', '9': '1.68%', '10': '3.28%', '11': '0.17%', '12': '0.17%'})	(1, {'1': '35.94%', '2': '5.73%', '3': '3.58%', '4': '3.65%', '5': '5.79%', '6': '4.36%', '7': '12.57%', '8': '7.23%', '9': '10.87%', '10': '8.92%', '11': '1.37%'})	(1, {'1': '38.33%', '2': '2.70%', '3': '0.94%', '4': '2.56%', '5': '0.94%', '6': '0.94%', '7': '11.61%', '8': '14.71%', '9': '16.60%', '10': '5.80%', '11': '4.86%'})	476	GOVERNANCE & POLITICAL SYSTEMS
(9, {'1': '14.06%', '2': '10.68%', '3': '8.59%', '4': '10.33%', '5': '4.95%', '6': '6.25%', '7': '5.30%', '8': '16.32%', '9': '16.84%', '10': '5.73%', '12': '0.95%'})		(2, {'2': '27.23%', '3': '7.36%', '4': '8.61%', '5': '14.24%', '6': '11.27%', '7': '7.98%', '8': '10.02%', '9': '5.48%', '10': '7.82%'})	(2, {'1': '15.98%', '2': '20.22%', '3': '5.78%', '4': '5.08%', '5': '2.41%', '6': '0.83%', '7': '7.31%', '8': '12.54%', '9': '13.67%', '10': '15.75%', '12': '0.43%'})	(2, {'1': '14.55%', '2': '16.76%', '3': '5.56%', '4': '4.99%', '5': '10.55%', '6': '8.01%', '7': '11.53%', '8': '6.30%', '9': '10.71%', '10': '10.87%', '12': '0.16%'})	(2, {'1': '16.19%', '2': '18.91%', '3': '6.73%', '4': '7.88%', '5': '9.31%', '6': '5.87%', '7': '11.75%', '8': '5.73%', '9': '7.88%', '10': '9.74%'})	(7, {'1': '8.25%', '2': '7.52%', '3': '10.55%', '4': '11.18%', '5': '8.67%', '6': '11.08%', '7': '12.85%', '8': '8.88%', '9': '11.49%', '10': '9.51%'})		(1, {'1': '17.45%', '2': '11.69%', '3': '11.33%', '4': '8.09%', '5': '6.29%', '6': '3.06%', '7': '10.07%', '8': '3.42%', '9': '15.29%', '10': '13.31%'})	(7, {'1': '2.14%', '2': '2.22%', '3': '7.19%', '4': '2.35%', '5': '11.27%', '6': '15.67%', '7': '17.46%', '8': '14.57%', '9': '12.97%', '10': '14.17%'})	(1, {'1': '21.92%', '2': '15.07%', '3': '2.74%', '4': '10.96%', '5': '4.11%', '6': '5.48%', '7': '5.48%', '8': '12.33%', '9': '8.22%', '10': '13.70%'})	(2, {'1': '11.37%', '2': '19.91%', '3': '9.38%', '4': '9.10%', '5': '8.91%', '6': '7.30%', '7': '13.18%', '8': '5.59%', '9': '8.25%', '10': '7.01%'})	(2, {'1': '13.52%', '2': '15.30%', '3': '7.50%', '4': '8.29%', '5': '10.46%', '6': '6.22%', '7': '9.58%', '8': '5.03%', '9': '11.65%', '10': '11.35%', '12': '1.09%'})	(2, {'1': '13.07%', '2': '20.84%', '3': '9.60%', '4': '7.22%', '5': '3.47%', '6': '3.02%', '7': '7.95%', '8': '13.99%', '9': '7.31%', '10': '13.44%', '12': '0.09%'})	(2, {'1': '7.90%', '2': '18.73%', '3': '9.52%', '4': '8.60%', '5': '8.60%', '6': '7.75%', '7': '11.20%', '8': '11.44%', '9': '9.06%', '10': '7.21%'})	(9, {'1': '8.78%', '2': '10.18%', '3': '3.59%', '4': '4.39%', '5': '1.20%', '7': '13.97%', '8': '18.36%', '9': '25.95%', '10': '13.37%', '12': '0.20%'})	477	GOVERNANCE & POLITICAL SYSTEMS
(8, {'1': '8.48%', '2': '8.18%', '3': '10.91%', '4': '10.76%', '5': '6.36%', '6': '9.85%', '7': '10.61%', '8': '14.09%', '9': '10.30%', '10': '10.00%', '12': '0.45%'})		(10, {'3': '3.43%', '4': '10.54%', '5': '11.03%', '6': '7.84%', '7': '10.05%', '8': '5.39%', '9': '7.35%', '10': '44.36%'})	(2, {'1': '9.30%', '2': '15.72%', '3': '6.78%', '4': '12.43%', '5': '2.30%', '6': '1.76%', '7': '13.20%', '8': '13.44%', '9': '10.42%', '10': '14.28%', '12': '0.37%'})	(10, {'1': '6.82%', '2': '10.65%', '3': '9.80%', '4': '7.03%', '5': '7.03%', '6': '8.63%', '7': '13.84%', '8': '6.60%', '9': '11.50%', '10': '18.10%'})	(10, {'1': '7.81%', '2': '14.51%', '3': '6.47%', '4': '7.37%', '5': '6.70%', '6': '8.93%', '7': '14.73%', '8': '7.81%', '9': '8.71%', '10': '16.96%'})	(9, {'1': '9.08%', '2': '6.37%', '3': '11.31%', '4': '9.55%', '5': '8.60%', '6': '10.03%', '7': '11.94%', '8': '10.99%', '9': '12.26%', '10': '9.87%'})		(10, {'1': '6.91%', '2': '7.57%', '3': '9.54%', '4': '12.83%', '5': '7.89%', '6': '4.61%', '7': '11.51%', '8': '7.24%', '9': '11.84%', '10': '20.07%'})	(10, {'1': '1.48%', '2': '1.37%', '3': '4.02%', '4': '1.50%', '5': '14.11%', '6': '16.51%', '7': '19.95%', '8': '11.52%', '9': '8.71%', '10': '20.83%'})	(1, {'1': '20.00%', '2': '4.00%', '3': '20.00%', '4': '8.00%', '6': '8.00%', '7': '20.00%', '8': '4.00%', '9': '4.00%', '10': '12.00%'})	(10, {'1': '9.25%', '2': '9.25%', '3': '12.67%', '4': '12.90%', '5': '8.33%', '6': '6.39%', '7': '12.21%', '8': '5.48%', '9': '8.45%', '10': '15.07%'})	(10, {'1': '9.38%', '2': '8.59%', '3': '8.45%', '4': '8.72%', '5': '11.36%', '6': '8.45%', '7': '12.42%', '8': '5.42%', '9': '12.55%', '10': '14.66%'})	(10, {'1': '7.31%', '2': '7.92%', '3': '14.11%', '4': '12.69%', '5': '5.08%', '6': '3.86%', '7': '10.96%', '8': '11.17%', '9': '9.34%', '10': '17.56%'})	(10, {'1': '5.37%', '2': '6.67%', '3': '8.06%', '4': '10.93%', '5': '10.65%', '6': '6.57%', '7': '16.39%', '8': '8.98%', '9': '7.96%', '10': '18.43%'})	(7, {'1': '12.50%', '2': '4.93%', '3': '4.61%', '4': '9.87%', '5': '1.32%', '6': '0.99%', '7': '19.41%', '8': '17.43%', '9': '16.12%', '10': '12.50%', '12': '0.33%'})	478	GOVERNANCE & POLITICAL SYSTEMS
(1, {'1': '58.82%', '2': '4.18%', '3': '3.58%', '4': '0.21%', '5': '32.35%', '6': '0.85%'})		(5, {'1': '39.34%', '2': '0.46%', '3': '0.12%', '5': '57.12%', '6': '2.96%'})	(1, {'1': '51.30%', '2': '0.84%', '3': '0.42%', '5': '43.80%', '6': '3.64%'})	(5, {'1': '46.98%', '2': '0.90%', '3': '1.89%', '4': '0.09%', '5': '48.09%', '6': '2.06%'})	(5, {'1': '30.23%', '2': '3.90%', '3': '0.72%', '4': '0.07%', '5': '62.74%', '6': '2.34%'})	(1, {'1': '45.14%', '2': '6.12%', '3': '8.31%', '4': '0.77%', '5': '38.20%', '6': '1.46%'})		(1, {'1': '47.42%', '2': '14.17%', '3': '1.34%', '5': '33.11%', '6': '3.97%'})	(1, {'1': '86.29%', '2': '0.16%', '3': '0.76%', '5': '12.58%', '6': '0.21%'})	(1, {'1': '46.92%', '2': '4.11%', '3': '2.69%', '4': '0.63%', '5': '39.81%', '6': '5.85%'})	(1, {'1': '54.39%', '2': '17.89%', '3': '1.33%', '4': '0.51%', '5': '24.18%', '6': '1.70%'})	(5, {'1': '31.56%', '2': '5.71%', '3': '0.21%', '5': '61.29%', '6': '1.24%'})	(5, {'1': '30.10%', '2': '2.30%', '3': '17.91%', '4': '2.19%', '5': '47.28%', '6': '0.22%'})	(1, {'1': '57.30%', '2': '19.53%', '3': '0.82%', '5': '20.87%', '6': '1.47%'})	(1, {'1': '66.02%', '2': '3.04%', '3': '4.97%', '5': '25.38%', '6': '0.59%'})	479	GOVERNANCE & POLITICAL SYSTEMS
(4.44, {'1': '21.37%', '2': '8.23%', '3': '8.58%', '4': '9.11%', '5': '8.58%', '6': '7.71%', '7': '36.43%'})		(3.69, {'1': '27.45%', '2': '13.03%', '3': '12.83%', '4': '6.81%', '5': '11.22%', '6': '7.01%', '7': '21.64%'})	(3.3, {'1': '35.20%', '2': '10.93%', '3': '10.11%', '4': '11.39%', '5': '11.62%', '6': '6.16%', '7': '14.59%'})	(3.49, {'1': '32.71%', '2': '17.55%', '3': '5.85%', '4': '8.51%', '5': '6.91%', '6': '4.52%', '7': '23.94%'})	(5.29, {'1': '8.52%', '2': '6.27%', '3': '8.52%', '4': '9.52%', '5': '8.52%', '6': '8.77%', '7': '49.87%'})	(3.14, {'1': '31.45%', '2': '13.78%', '3': '12.01%', '4': '13.60%', '5': '16.78%', '6': '6.01%', '7': '6.36%'})		(3.57, {'1': '37.94%', '2': '8.82%', '3': '8.82%', '4': '6.47%', '5': '6.47%', '6': '3.82%', '7': '27.65%'})	(2.61, {'1': '37.47%', '2': '26.45%', '3': '13.03%', '4': '8.21%', '5': '2.15%', '6': '0.99%', '7': '11.70%'})	(N/A, {})	(2.02, {'1': '64.34%', '2': '14.34%', '3': '7.17%', '4': '2.52%', '5': '1.36%', '6': '1.74%', '7': '8.53%'})	(1.85, {'1': '64.37%', '2': '14.29%', '3': '8.67%', '4': '4.98%', '5': '3.37%', '6': '1.28%', '7': '3.05%'})	(2.47, {'1': '41.33%', '2': '22.29%', '3': '10.86%', '4': '9.33%', '5': '8.57%', '6': '4.76%', '7': '2.86%'})	(1.46, {'1': '78.77%', '2': '9.54%', '3': '6.31%', '4': '2.62%', '6': '0.46%', '7': '2.31%'})	(1.18, {'1': '91.18%', '2': '4.96%', '3': '1.10%', '4': '0.55%', '5': '1.65%', '6': '0.28%', '7': '0.28%'})	480	GOVERNANCE & POLITICAL SYSTEMS
(3.04, {'1': '27.82%', '2': '21.24%', '3': '15.23%', '4': '12.59%', '5': '7.89%', '6': '8.08%', '7': '7.14%'})		(3.23, {'1': '20.70%', '2': '26.37%', '3': '13.92%', '4': '9.71%', '5': '11.36%', '6': '13.74%', '7': '4.21%'})	(3.77, {'1': '13.53%', '2': '24.44%', '3': '9.89%', '4': '14.09%', '5': '12.85%', '6': '12.25%', '7': '12.95%'})	(3.8, {'1': '14.33%', '2': '23.69%', '3': '14.88%', '4': '6.06%', '5': '10.19%', '6': '17.63%', '7': '13.22%'})	(4.31, {'1': '16.63%', '2': '10.45%', '3': '12.35%', '4': '12.35%', '5': '10.93%', '6': '8.79%', '7': '28.50%'})	(3.68, {'1': '13.04%', '2': '24.82%', '3': '14.46%', '4': '10.89%', '5': '10.89%', '6': '17.86%', '7': '8.04%'})		(3.82, {'1': '14.62%', '2': '18.60%', '3': '15.95%', '4': '10.30%', '5': '13.29%', '6': '15.61%', '7': '11.63%'})	(2.88, {'1': '19.82%', '2': '34.02%', '3': '20.06%', '4': '9.30%', '5': '3.92%', '6': '6.69%', '7': '6.19%'})	(N/A, {})	(2.96, {'1': '16.70%', '2': '43.68%', '3': '11.13%', '4': '8.78%', '5': '5.35%', '6': '4.07%', '7': '10.28%'})	(3.46, {'1': '9.29%', '2': '37.80%', '3': '14.69%', '4': '10.80%', '5': '7.34%', '6': '3.89%', '7': '16.20%'})	(2.9, {'1': '10.52%', '2': '41.68%', '3': '20.65%', '4': '10.52%', '5': '9.56%', '6': '5.35%', '7': '1.72%'})	(3.22, {'1': '4.78%', '2': '53.27%', '3': '12.21%', '4': '7.26%', '5': '4.60%', '6': '3.36%', '7': '14.51%'})	(3.64, {'1': '3.08%', '2': '44.31%', '3': '11.08%', '4': '11.69%', '5': '5.23%', '6': '5.85%', '7': '18.77%'})	481	GOVERNANCE & POLITICAL SYSTEMS
(4.12, {'1': '4.42%', '2': '17.20%', '3': '19.66%', '4': '17.94%', '5': '13.27%', '6': '16.46%', '7': '11.06%'})		(3.98, {'1': '7.21%', '2': '10.59%', '3': '26.13%', '4': '17.57%', '5': '19.14%', '6': '10.36%', '7': '9.01%'})	(4.17, {'1': '4.23%', '2': '13.24%', '3': '23.20%', '4': '20.58%', '5': '12.76%', '6': '11.22%', '7': '14.76%'})	(3.84, {'1': '13.44%', '2': '8.75%', '3': '25.00%', '4': '15.31%', '5': '17.81%', '6': '9.69%', '7': '10.00%'})	(4.87, {'1': '8.62%', '2': '10.06%', '3': '12.36%', '4': '10.92%', '5': '10.34%', '6': '8.05%', '7': '39.66%'})	(3.72, {'1': '10.47%', '2': '14.10%', '3': '24.79%', '4': '19.02%', '5': '14.32%', '6': '9.83%', '7': '7.48%'})		(4.16, {'1': '4.35%', '2': '17.93%', '3': '17.39%', '4': '16.85%', '5': '17.39%', '6': '13.59%', '7': '12.50%'})	(5.15, {'1': '0.51%', '2': '8.18%', '3': '16.32%', '4': '9.67%', '5': '15.27%', '6': '15.74%', '7': '34.31%'})	(N/A, {})	(3.95, {'1': '2.13%', '2': '10.67%', '3': '38.93%', '4': '16.80%', '5': '12.80%', '6': '6.67%', '7': '12.00%'})	(3.78, {'1': '4.91%', '2': '13.58%', '3': '38.11%', '4': '15.85%', '5': '8.68%', '6': '7.17%', '7': '11.70%'})	(3.41, {'1': '11.07%', '2': '13.01%', '3': '33.98%', '4': '23.11%', '5': '8.16%', '6': '6.41%', '7': '4.27%'})	(3.57, {'1': '6.37%', '2': '12.03%', '3': '47.17%', '4': '10.38%', '5': '8.96%', '6': '6.84%', '7': '8.25%'})	(3.3, {'1': '0.32%', '2': '23.73%', '3': '49.37%', '4': '7.59%', '5': '12.34%', '6': '4.43%', '7': '2.22%'})	482	GOVERNANCE & POLITICAL SYSTEMS
(3.32, {'1': '18.08%', '2': '20.04%', '3': '20.92%', '4': '15.03%', '5': '11.11%', '6': '7.84%', '7': '6.97%'})		(4.08, {'1': '9.44%', '2': '10.41%', '3': '13.32%', '4': '28.09%', '5': '17.43%', '6': '10.90%', '7': '10.41%'})	(4.44, {'1': '5.22%', '2': '5.94%', '3': '18.29%', '4': '25.24%', '5': '14.37%', '6': '17.40%', '7': '13.55%'})	(4.25, {'1': '4.62%', '2': '8.40%', '3': '13.87%', '4': '34.03%', '5': '18.49%', '6': '10.92%', '7': '9.66%'})	(4.7, {'1': '9.04%', '2': '10.17%', '3': '16.10%', '4': '9.32%', '5': '11.30%', '6': '9.60%', '7': '34.46%'})	(4.0, {'1': '10.16%', '2': '11.96%', '3': '14.45%', '4': '27.09%', '5': '14.67%', '6': '10.84%', '7': '10.84%'})		(4.36, {'1': '10.87%', '2': '9.42%', '3': '12.32%', '4': '14.49%', '5': '18.84%', '6': '21.74%', '7': '12.32%'})	(4.73, {'1': '2.72%', '2': '9.39%', '3': '9.73%', '4': '20.64%', '5': '18.89%', '6': '25.49%', '7': '13.13%'})	(N/A, {})	(4.47, {'1': '2.01%', '2': '7.18%', '3': '10.06%', '4': '37.07%', '5': '21.84%', '6': '10.34%', '7': '11.49%'})	(4.61, {'1': '1.97%', '2': '4.93%', '3': '13.79%', '4': '32.02%', '5': '18.23%', '6': '14.78%', '7': '14.29%'})	(4.13, {'1': '9.78%', '2': '6.11%', '3': '12.83%', '4': '30.96%', '5': '19.35%', '6': '14.87%', '7': '6.11%'})	(4.47, {'1': '2.04%', '2': '5.90%', '3': '7.94%', '4': '42.40%', '5': '17.69%', '6': '17.01%', '7': '7.03%'})	(4.63, {'1': '0.73%', '2': '2.20%', '3': '7.33%', '4': '46.15%', '5': '17.22%', '6': '19.41%', '7': '6.96%'})	483	GOVERNANCE & POLITICAL SYSTEMS
(3.76, {'1': '9.32%', '2': '16.37%', '3': '20.15%', '4': '19.14%', '5': '19.65%', '6': '9.07%', '7': '6.30%'})		(4.01, {'1': '11.52%', '2': '13.13%', '3': '14.06%', '4': '16.13%', '5': '23.04%', '6': '13.13%', '7': '8.99%'})	(4.47, {'1': '6.30%', '2': '11.68%', '3': '13.65%', '4': '11.10%', '5': '29.29%', '6': '10.63%', '7': '17.34%'})	(4.12, {'1': '7.66%', '2': '10.53%', '3': '19.14%', '4': '16.27%', '5': '26.32%', '6': '11.00%', '7': '9.09%'})	(4.87, {'1': '7.50%', '2': '10.00%', '3': '9.72%', '4': '14.72%', '5': '11.67%', '6': '11.11%', '7': '35.28%'})	(4.39, {'1': '9.30%', '2': '10.20%', '3': '14.29%', '4': '13.83%', '5': '22.00%', '6': '12.02%', '7': '18.37%'})		(3.91, {'1': '5.38%', '2': '15.05%', '3': '22.04%', '4': '20.97%', '5': '19.89%', '6': '10.22%', '7': '6.45%'})	(4.54, {'1': '3.65%', '2': '3.95%', '3': '13.29%', '4': '21.28%', '5': '36.53%', '6': '14.55%', '7': '6.74%'})	(N/A, {})	(4.48, {'1': '6.79%', '2': '8.36%', '3': '14.10%', '4': '10.97%', '5': '31.85%', '6': '16.71%', '7': '11.23%'})	(4.76, {'1': '3.23%', '2': '5.53%', '3': '11.06%', '4': '19.35%', '5': '28.57%', '6': '17.97%', '7': '14.29%'})	(4.46, {'1': '13.59%', '2': '6.58%', '3': '7.86%', '4': '7.86%', '5': '33.55%', '6': '17.83%', '7': '12.74%'})	(4.21, {'1': '4.76%', '2': '10.97%', '3': '16.77%', '4': '11.80%', '5': '41.20%', '6': '10.77%', '7': '3.73%'})	(3.84, {'1': '2.71%', '2': '23.05%', '3': '18.64%', '4': '10.51%', '5': '37.29%', '6': '3.73%', '7': '4.07%'})	484	GOVERNANCE & POLITICAL SYSTEMS
(4.77, {'1': '3.77%', '2': '8.37%', '3': '9.21%', '4': '12.55%', '5': '30.54%', '6': '22.59%', '7': '12.97%'})		(4.45, {'1': '8.97%', '2': '16.03%', '3': '8.97%', '4': '13.04%', '5': '9.24%', '6': '27.99%', '7': '15.76%'})	(4.53, {'1': '3.94%', '2': '18.60%', '3': '9.31%', '4': '14.90%', '5': '9.90%', '6': '28.80%', '7': '14.55%'})	(4.02, {'1': '13.15%', '2': '22.07%', '3': '11.74%', '4': '6.57%', '5': '8.45%', '6': '24.88%', '7': '13.15%'})	(4.54, {'1': '15.73%', '2': '7.73%', '3': '12.27%', '4': '12.00%', '5': '10.40%', '6': '7.47%', '7': '34.40%'})	(4.63, {'1': '12.93%', '2': '9.76%', '3': '8.71%', '4': '9.23%', '5': '13.72%', '6': '20.32%', '7': '25.33%'})		(4.07, {'1': '11.68%', '2': '14.60%', '3': '12.41%', '4': '18.98%', '5': '16.06%', '6': '11.68%', '7': '14.60%'})	(3.54, {'1': '15.16%', '2': '17.86%', '3': '21.64%', '4': '17.80%', '5': '7.23%', '6': '11.48%', '7': '8.83%'})	(N/A, {})	(5.27, {'1': '2.66%', '2': '7.60%', '3': '7.22%', '4': '8.37%', '5': '9.89%', '6': '44.87%', '7': '19.39%'})	(5.01, {'1': '4.32%', '2': '7.03%', '3': '9.73%', '4': '12.97%', '5': '16.22%', '6': '27.57%', '7': '22.16%'})	(5.67, {'1': '2.89%', '2': '4.58%', '3': '6.51%', '4': '5.30%', '5': '8.67%', '6': '33.49%', '7': '38.55%'})	(5.72, {'1': '0.76%', '2': '1.77%', '3': '4.55%', '4': '11.11%', '5': '8.59%', '6': '45.45%', '7': '27.78%'})	(5.89, {'1': '1.23%', '2': '1.23%', '3': '4.32%', '4': '3.09%', '5': '7.41%', '6': '56.17%', '7': '26.54%'})	485	GOVERNANCE & POLITICAL SYSTEMS
(4.83, {'1': '9.72%', '2': '5.56%', '3': '5.56%', '4': '14.81%', '5': '16.20%', '6': '31.94%', '7': '16.20%'})		(4.51, {'1': '15.81%', '2': '10.00%', '3': '10.65%', '4': '10.00%', '5': '7.74%', '6': '16.13%', '7': '29.68%'})	(4.26, {'1': '18.06%', '2': '10.76%', '3': '10.11%', '4': '10.25%', '5': '15.34%', '6': '9.92%', '7': '25.56%'})	(4.78, {'1': '10.53%', '2': '9.21%', '3': '10.53%', '4': '11.18%', '5': '9.87%', '6': '17.11%', '7': '31.58%'})	(5.14, {'1': '5.69%', '2': '7.32%', '3': '10.57%', '4': '11.65%', '5': '13.55%', '6': '11.11%', '7': '40.11%'})	(4.51, {'1': '13.27%', '2': '9.61%', '3': '11.90%', '4': '13.27%', '5': '9.84%', '6': '13.73%', '7': '28.38%'})		(3.01, {'1': '31.91%', '2': '18.52%', '3': '13.96%', '4': '10.54%', '5': '9.40%', '6': '8.83%', '7': '6.84%'})	(4.79, {'1': '7.42%', '2': '8.58%', '3': '10.65%', '4': '19.14%', '5': '13.02%', '6': '7.17%', '7': '34.01%'})	(N/A, {})	(5.54, {'1': '2.92%', '2': '2.92%', '3': '8.33%', '4': '15.00%', '5': '10.42%', '6': '14.58%', '7': '45.83%'})	(5.43, {'1': '4.63%', '2': '4.63%', '3': '4.63%', '4': '12.96%', '5': '13.89%', '6': '21.30%', '7': '37.96%'})	(5.77, {'1': '5.04%', '2': '3.26%', '3': '5.34%', '4': '8.90%', '5': '6.23%', '6': '16.02%', '7': '55.19%'})	(5.01, {'1': '7.00%', '2': '9.26%', '3': '10.91%', '4': '10.29%', '5': '11.93%', '6': '12.35%', '7': '38.27%'})	(6.03, {'2': '1.83%', '3': '3.05%', '4': '14.63%', '5': '8.54%', '6': '14.63%', '7': '57.32%'})	486	GOVERNANCE & POLITICAL SYSTEMS
(4.58, {'1': '18.90%', '2': '9.21%', '3': '10.02%', '4': '8.08%', '5': '6.30%', '6': '6.14%', '7': '41.36%'})		(3.72, {'1': '23.74%', '2': '15.29%', '3': '11.33%', '4': '11.51%', '5': '11.69%', '6': '5.58%', '7': '20.86%'})	(3.43, {'1': '26.65%', '2': '14.19%', '3': '15.72%', '4': '13.39%', '5': '9.09%', '6': '5.32%', '7': '15.66%'})	(3.76, {'1': '25.55%', '2': '16.22%', '3': '9.09%', '4': '10.57%', '5': '7.13%', '6': '7.13%', '7': '24.32%'})	(5.54, {'1': '6.67%', '2': '6.00%', '3': '6.89%', '4': '8.44%', '5': '8.00%', '6': '7.56%', '7': '56.44%'})	(2.88, {'1': '38.71%', '2': '14.23%', '3': '12.52%', '4': '10.82%', '5': '9.87%', '6': '5.88%', '7': '7.97%'})		(4.4, {'1': '23.21%', '2': '7.81%', '3': '9.54%', '4': '7.81%', '5': '7.59%', '6': '4.77%', '7': '39.26%'})	(2.93, {'1': '32.04%', '2': '29.67%', '3': '11.66%', '4': '5.33%', '5': '0.53%', '6': '2.27%', '7': '18.51%'})	(N/A, {})	(2.22, {'1': '60.93%', '2': '13.95%', '3': '6.28%', '4': '3.49%', '5': '2.09%', '6': '2.79%', '7': '10.47%'})	(2.06, {'1': '56.00%', '2': '17.76%', '3': '10.72%', '4': '6.72%', '5': '2.40%', '6': '0.96%', '7': '5.44%'})	(2.8, {'1': '39.68%', '2': '16.34%', '3': '11.49%', '4': '10.23%', '5': '7.72%', '6': '7.72%', '7': '6.82%'})	(1.57, {'1': '76.47%', '2': '9.15%', '3': '6.21%', '4': '3.43%', '5': '1.14%', '6': '0.98%', '7': '2.61%'})	(1.18, {'1': '89.66%', '2': '5.68%', '3': '2.07%', '4': '1.81%', '5': '0.78%'})	487	GOVERNANCE & POLITICAL SYSTEMS
(3.07, {'1': '27.67%', '2': '20.80%', '3': '14.47%', '4': '12.84%', '5': '9.04%', '6': '8.32%', '7': '6.87%'})		(3.14, {'1': '21.07%', '2': '28.39%', '3': '13.57%', '4': '11.96%', '5': '8.04%', '6': '11.79%', '7': '5.18%'})	(3.9, {'1': '11.02%', '2': '20.80%', '3': '15.75%', '4': '13.19%', '5': '12.27%', '6': '12.77%', '7': '14.20%'})	(3.98, {'1': '11.96%', '2': '23.16%', '3': '13.99%', '4': '7.12%', '5': '8.91%', '6': '18.83%', '7': '16.03%'})	(4.38, {'1': '12.30%', '2': '12.30%', '3': '12.53%', '4': '15.88%', '5': '10.51%', '6': '8.28%', '7': '28.19%'})	(3.29, {'1': '15.59%', '2': '26.62%', '3': '18.63%', '4': '12.93%', '5': '9.70%', '6': '11.22%', '7': '5.32%'})		(3.84, {'1': '11.02%', '2': '18.46%', '3': '16.53%', '4': '14.05%', '5': '16.25%', '6': '16.80%', '7': '6.89%'})	(2.84, {'1': '25.69%', '2': '30.56%', '3': '16.91%', '4': '8.50%', '5': '5.11%', '6': '5.84%', '7': '7.39%'})	(N/A, {})	(3.25, {'1': '13.90%', '2': '39.57%', '3': '11.50%', '4': '8.56%', '5': '7.49%', '6': '6.95%', '7': '12.03%'})	(3.72, {'1': '10.82%', '2': '30.06%', '3': '14.83%', '4': '11.02%', '5': '7.82%', '6': '4.61%', '7': '20.84%'})	(2.91, {'1': '12.77%', '2': '38.83%', '3': '21.63%', '4': '11.17%', '5': '6.74%', '6': '4.43%', '7': '4.43%'})	(3.33, {'1': '5.48%', '2': '50.64%', '3': '10.24%', '4': '8.41%', '5': '5.48%', '6': '4.02%', '7': '15.72%'})	(3.52, {'1': '2.49%', '2': '46.13%', '3': '11.88%', '4': '13.54%', '5': '3.59%', '6': '6.63%', '7': '15.75%'})	488	GOVERNANCE & POLITICAL SYSTEMS
(4.34, {'1': '4.25%', '2': '12.53%', '3': '19.46%', '4': '14.09%', '5': '18.57%', '6': '20.36%', '7': '10.74%'})		(3.69, {'1': '8.55%', '2': '15.48%', '3': '28.11%', '4': '14.46%', '5': '18.94%', '6': '8.96%', '7': '5.50%'})	(4.49, {'1': '3.91%', '2': '8.45%', '3': '19.32%', '4': '18.53%', '5': '18.20%', '6': '15.84%', '7': '15.76%'})	(3.85, {'1': '12.88%', '2': '9.20%', '3': '24.23%', '4': '12.27%', '5': '23.01%', '6': '11.66%', '7': '6.75%'})	(4.69, {'1': '8.58%', '2': '6.43%', '3': '16.35%', '4': '15.55%', '5': '13.40%', '6': '8.58%', '7': '31.10%'})	(3.91, {'1': '8.52%', '2': '11.88%', '3': '23.77%', '4': '20.18%', '5': '17.94%', '6': '6.95%', '7': '10.76%'})		(4.1, {'1': '7.69%', '2': '9.50%', '3': '17.65%', '4': '23.53%', '5': '22.17%', '6': '11.31%', '7': '8.14%'})	(4.56, {'1': '1.32%', '2': '6.59%', '3': '18.65%', '4': '25.08%', '5': '22.40%', '6': '8.83%', '7': '17.14%'})	(N/A, {})	(4.16, {'1': '2.42%', '2': '10.57%', '3': '31.72%', '4': '16.01%', '5': '15.41%', '6': '10.88%', '7': '12.99%'})	(3.6, {'1': '4.71%', '2': '17.03%', '3': '38.41%', '4': '13.77%', '5': '11.23%', '6': '9.42%', '7': '5.43%'})	(3.3, {'1': '11.38%', '2': '17.25%', '3': '33.21%', '4': '18.53%', '5': '10.64%', '6': '5.69%', '7': '3.30%'})	(3.76, {'1': '3.41%', '2': '11.82%', '3': '45.91%', '4': '9.77%', '5': '9.32%', '6': '12.73%', '7': '7.05%'})	(3.16, {'1': '1.13%', '2': '25.50%', '3': '49.86%', '4': '7.65%', '5': '11.33%', '6': '4.53%'})	489	GOVERNANCE & POLITICAL SYSTEMS
(3.19, {'1': '16.74%', '2': '24.90%', '3': '18.83%', '4': '16.53%', '5': '11.92%', '6': '7.11%', '7': '3.97%'})		(4.05, {'1': '8.22%', '2': '9.59%', '3': '16.67%', '4': '28.31%', '5': '17.58%', '6': '10.96%', '7': '8.68%'})	(4.43, {'1': '5.74%', '2': '11.48%', '3': '11.13%', '4': '22.80%', '5': '19.16%', '6': '13.42%', '7': '16.26%'})	(3.98, {'1': '4.64%', '2': '5.06%', '3': '21.94%', '4': '40.93%', '5': '16.03%', '6': '6.33%', '7': '5.06%'})	(4.71, {'1': '6.96%', '2': '12.37%', '3': '14.69%', '4': '11.08%', '5': '12.63%', '6': '7.99%', '7': '34.28%'})	(4.0, {'1': '10.23%', '2': '12.79%', '3': '14.19%', '4': '23.72%', '5': '17.67%', '6': '11.40%', '7': '10.00%'})		(4.15, {'1': '8.09%', '2': '12.72%', '3': '12.14%', '4': '21.97%', '5': '21.97%', '6': '14.45%', '7': '8.67%'})	(4.68, {'1': '3.08%', '2': '8.04%', '3': '10.66%', '4': '21.21%', '5': '16.87%', '6': '33.65%', '7': '6.50%'})	(N/A, {})	(4.38, {'1': '4.03%', '2': '7.72%', '3': '11.74%', '4': '33.89%', '5': '17.45%', '6': '15.77%', '7': '9.40%'})	(4.58, {'1': '1.49%', '2': '7.96%', '3': '8.96%', '4': '34.83%', '5': '18.41%', '6': '15.92%', '7': '12.44%'})	(4.01, {'1': '7.56%', '2': '10.96%', '3': '15.31%', '4': '30.43%', '5': '16.07%', '6': '13.99%', '7': '5.67%'})	(4.46, {'1': '1.59%', '2': '4.76%', '3': '9.98%', '4': '42.63%', '5': '17.69%', '6': '17.69%', '7': '5.67%'})	(4.72, {'1': '0.63%', '2': '1.26%', '3': '4.10%', '4': '47.95%', '5': '21.14%', '6': '15.14%', '7': '9.78%'})	490	GOVERNANCE & POLITICAL SYSTEMS
(3.76, {'1': '12.27%', '2': '15.05%', '3': '18.98%', '4': '16.90%', '5': '17.36%', '6': '14.12%', '7': '5.32%'})		(4.09, {'1': '11.57%', '2': '12.45%', '3': '13.32%', '4': '15.07%', '5': '22.71%', '6': '15.28%', '7': '9.61%'})	(3.76, {'1': '13.33%', '2': '14.09%', '3': '15.86%', '4': '19.70%', '5': '19.59%', '6': '11.62%', '7': '5.80%'})	(3.94, {'1': '8.44%', '2': '12.00%', '3': '24.00%', '4': '13.33%', '5': '23.11%', '6': '12.89%', '7': '6.22%'})	(4.71, {'1': '7.32%', '2': '12.37%', '3': '12.37%', '4': '12.88%', '5': '12.37%', '6': '10.35%', '7': '32.32%'})	(4.52, {'1': '7.71%', '2': '7.71%', '3': '14.22%', '4': '15.90%', '5': '20.96%', '6': '17.11%', '7': '16.39%'})		(4.02, {'1': '6.13%', '2': '17.45%', '3': '18.87%', '4': '16.51%', '5': '14.62%', '6': '19.34%', '7': '7.08%'})	(4.29, {'1': '3.47%', '2': '1.28%', '3': '26.70%', '4': '19.98%', '5': '31.34%', '6': '14.75%', '7': '2.48%'})	(N/A, {})	(4.32, {'1': '6.42%', '2': '10.09%', '3': '17.43%', '4': '10.70%', '5': '31.19%', '6': '14.98%', '7': '9.17%'})	(4.56, {'1': '3.41%', '2': '6.34%', '3': '14.15%', '4': '18.05%', '5': '31.71%', '6': '18.05%', '7': '8.29%'})	(4.31, {'1': '13.27%', '2': '5.77%', '3': '10.19%', '4': '14.23%', '5': '31.35%', '6': '14.23%', '7': '10.96%'})	(4.1, {'1': '6.95%', '2': '13.91%', '3': '11.25%', '4': '16.36%', '5': '38.04%', '6': '8.79%', '7': '4.70%'})	(4.04, {'1': '2.73%', '2': '17.58%', '3': '19.39%', '4': '6.97%', '5': '41.82%', '6': '9.70%', '7': '1.82%'})	491	GOVERNANCE & POLITICAL SYSTEMS
(4.7, {'1': '3.01%', '2': '7.14%', '3': '10.53%', '4': '19.92%', '5': '23.68%', '6': '26.69%', '7': '9.02%'})		(4.57, {'1': '10.68%', '2': '11.17%', '3': '10.92%', '4': '7.52%', '5': '13.83%', '6': '29.61%', '7': '16.26%'})	(4.22, {'1': '8.13%', '2': '12.10%', '3': '22.73%', '4': '11.40%', '5': '11.76%', '6': '20.10%', '7': '13.77%'})	(3.65, {'1': '18.35%', '2': '27.52%', '3': '9.63%', '4': '3.21%', '5': '8.72%', '6': '21.56%', '7': '11.01%'})	(4.58, {'1': '13.65%', '2': '9.43%', '3': '12.41%', '4': '10.42%', '5': '10.67%', '6': '10.42%', '7': '33.00%'})	(4.77, {'1': '10.80%', '2': '8.86%', '3': '6.93%', '4': '9.97%', '5': '15.51%', '6': '24.93%', '7': '22.99%'})		(4.17, {'1': '12.88%', '2': '13.50%', '3': '17.18%', '4': '11.66%', '5': '9.82%', '6': '15.34%', '7': '19.63%'})	(3.05, {'1': '28.01%', '2': '17.05%', '3': '16.87%', '4': '13.35%', '5': '12.46%', '6': '8.77%', '7': '3.49%'})	(N/A, {})	(5.06, {'1': '4.20%', '2': '8.40%', '3': '7.98%', '4': '10.50%', '5': '12.61%', '6': '37.82%', '7': '18.49%'})	(4.99, {'1': '3.61%', '2': '4.64%', '3': '13.40%', '4': '13.92%', '5': '15.46%', '6': '29.38%', '7': '19.59%'})	(5.44, {'1': '4.71%', '2': '4.07%', '3': '5.57%', '4': '5.78%', '5': '14.35%', '6': '38.97%', '7': '26.55%'})	(5.49, {'1': '1.71%', '2': '2.68%', '3': '9.27%', '4': '8.29%', '5': '10.98%', '6': '43.17%', '7': '23.90%'})	(5.86, {'1': '0.80%', '2': '0.80%', '3': '3.59%', '4': '6.37%', '5': '10.76%', '6': '50.60%', '7': '27.09%'})	492	GOVERNANCE & POLITICAL SYSTEMS
(4.64, {'1': '9.05%', '2': '7.62%', '3': '12.38%', '4': '12.38%', '5': '16.19%', '6': '24.29%', '7': '18.10%'})		(4.73, {'1': '12.79%', '2': '7.83%', '3': '8.88%', '4': '13.32%', '5': '9.92%', '6': '15.40%', '7': '31.85%'})	(4.81, {'1': '4.80%', '2': '9.96%', '3': '8.24%', '4': '19.83%', '5': '16.43%', '6': '15.36%', '7': '25.38%'})	(4.55, {'1': '12.42%', '2': '16.77%', '3': '6.83%', '4': '11.18%', '5': '6.83%', '6': '12.42%', '7': '33.54%'})	(4.99, {'1': '7.29%', '2': '6.53%', '3': '13.57%', '4': '11.56%', '5': '12.31%', '6': '10.55%', '7': '38.19%'})	(4.58, {'1': '10.64%', '2': '13.37%', '3': '10.64%', '4': '10.40%', '5': '9.90%', '6': '17.33%', '7': '27.72%'})		(3.14, {'1': '28.42%', '2': '20.38%', '3': '11.26%', '4': '13.67%', '5': '8.31%', '6': '10.72%', '7': '7.24%'})	(5.65, {'1': '1.51%', '2': '10.06%', '3': '8.25%', '4': '9.61%', '5': '3.79%', '6': '5.68%', '7': '61.09%'})	(N/A, {})	(4.97, {'1': '9.84%', '2': '5.74%', '3': '10.25%', '4': '14.34%', '5': '9.84%', '6': '11.89%', '7': '38.11%'})	(5.12, {'1': '3.64%', '2': '10.00%', '3': '5.45%', '4': '15.45%', '5': '13.64%', '6': '20.91%', '7': '30.91%'})	(5.6, {'1': '8.09%', '2': '5.64%', '3': '2.70%', '4': '6.62%', '5': '9.56%', '6': '13.73%', '7': '53.68%'})	(4.91, {'1': '7.91%', '2': '11.54%', '3': '10.04%', '4': '9.62%', '5': '11.75%', '6': '11.11%', '7': '38.03%'})	(5.99, {'2': '1.75%', '3': '4.80%', '4': '11.35%', '5': '8.73%', '6': '21.40%', '7': '51.97%'})	493	GOVERNANCE & POLITICAL SYSTEMS
(3.98, {'1': '27.73%', '2': '11.76%', '3': '7.14%', '4': '9.24%', '5': '7.98%', '6': '4.41%', '7': '31.72%'})		(3.15, {'1': '36.33%', '2': '14.37%', '3': '11.38%', '4': '8.78%', '5': '8.98%', '6': '5.59%', '7': '14.57%'})	(3.0, {'1': '41.60%', '2': '15.09%', '3': '8.89%', '4': '7.01%', '5': '5.43%', '6': '7.74%', '7': '14.25%'})	(2.91, {'1': '46.48%', '2': '13.15%', '3': '6.42%', '4': '6.42%', '5': '7.03%', '6': '5.20%', '7': '15.29%'})	(4.46, {'1': '22.31%', '2': '7.18%', '3': '9.23%', '4': '7.44%', '5': '7.95%', '6': '8.97%', '7': '36.92%'})	(2.94, {'1': '40.76%', '2': '12.92%', '3': '9.58%', '4': '9.80%', '5': '10.69%', '6': '7.57%', '7': '8.69%'})		(2.95, {'1': '48.40%', '2': '8.65%', '3': '11.86%', '4': '2.88%', '5': '5.45%', '6': '4.17%', '7': '18.59%'})	(1.79, {'1': '74.60%', '2': '11.83%', '3': '2.17%', '4': '2.01%', '7': '9.39%'})	(N/A, {})	(2.18, {'1': '63.40%', '2': '14.41%', '3': '2.59%', '4': '3.46%', '5': '2.59%', '6': '3.75%', '7': '9.80%'})	(1.76, {'1': '65.44%', '2': '15.86%', '3': '9.18%', '4': '2.34%', '5': '3.84%', '6': '1.00%', '7': '2.34%'})	(2.77, {'1': '35.89%', '2': '19.56%', '3': '15.52%', '4': '8.47%', '5': '7.26%', '6': '7.66%', '7': '5.65%'})	(1.61, {'1': '77.17%', '2': '7.67%', '3': '6.50%', '4': '2.67%', '5': '1.50%', '6': '0.67%', '7': '3.83%'})	(1.16, {'1': '93.90%', '2': '3.49%', '3': '0.29%', '4': '0.29%', '6': '0.87%', '7': '1.16%'})	494	GOVERNANCE & POLITICAL SYSTEMS
(2.97, {'1': '30.66%', '2': '18.87%', '3': '15.09%', '4': '13.44%', '5': '8.49%', '6': '7.08%', '7': '6.37%'})		(2.99, {'1': '20.38%', '2': '34.29%', '3': '12.76%', '4': '9.33%', '5': '9.71%', '6': '9.14%', '7': '4.38%'})	(3.79, {'1': '10.86%', '2': '25.96%', '3': '13.28%', '4': '13.78%', '5': '10.84%', '6': '9.88%', '7': '15.40%'})	(3.5, {'1': '11.00%', '2': '34.95%', '3': '13.92%', '4': '8.41%', '5': '8.09%', '6': '11.65%', '7': '11.97%'})	(4.04, {'1': '16.67%', '2': '12.88%', '3': '15.40%', '4': '13.13%', '5': '12.37%', '6': '5.81%', '7': '23.74%'})	(3.43, {'1': '14.80%', '2': '25.11%', '3': '15.25%', '4': '17.04%', '5': '10.76%', '6': '9.19%', '7': '7.85%'})		(3.37, {'1': '12.92%', '2': '32.10%', '3': '14.76%', '4': '11.81%', '5': '11.07%', '6': '8.86%', '7': '8.49%'})	(3.87, {'1': '16.74%', '2': '33.40%', '3': '9.56%', '4': '2.29%', '7': '38.01%'})	(N/A, {})	(3.01, {'1': '13.62%', '2': '45.51%', '3': '12.07%', '4': '8.05%', '5': '4.02%', '6': '9.29%', '7': '7.43%'})	(3.5, {'1': '10.54%', '2': '36.13%', '3': '15.70%', '4': '8.39%', '5': '6.02%', '6': '6.45%', '7': '16.77%'})	(2.86, {'1': '11.67%', '2': '42.92%', '3': '18.54%', '4': '10.21%', '5': '10.00%', '6': '4.38%', '7': '2.29%'})	(3.21, {'1': '6.19%', '2': '53.38%', '3': '11.80%', '4': '5.42%', '5': '3.68%', '6': '4.06%', '7': '15.47%'})	(3.37, {'1': '2.65%', '2': '49.67%', '3': '12.91%', '4': '11.26%', '5': '3.97%', '6': '5.30%', '7': '14.24%'})	495	GOVERNANCE & POLITICAL SYSTEMS
[truncated: 369 more rows]
